# Supplementary material
Source: HighWire-hosted journal article supplement (doi:10.1101/rna.080738.125)
Supplement: S1_Data.xlsx [file S1_Data.xlsx]

## Sheet: WT_0h_vs_WT_3h
GeneID	Description	Aliases	Mechanism	Isoform1	Isoform2	Time1	Time2
AT1G01790	Encodes a member of the cation/proton antiporters-2 antiporter superfamily, the K efflux antiporter KEA1 that is localized to the chloroplast envelope.	ATKEA1,KEA1	A3	AT1G01790_P1	AT1G01790_c3	WT_3h	WT_0h
AT1G02010	member of KEULE Gene Family	SEC1A	IR	AT1G02010_P1	AT1G02010_P3	WT_3h	WT_0h
AT1G02610	RING/FYVE/PHD zinc finger superfamily protein;(source:Araport11)	NA	ES	AT1G02610_P2	AT1G02610_ID3	WT_3h	WT_0h
AT1G02610	RING/FYVE/PHD zinc finger superfamily protein;(source:Araport11)	NA	IR	AT1G02610_P2	AT1G02610_ID3	WT_3h	WT_0h
AT1G02910	Mutants defective in this gene were shown to have a reduced PSII content (overall reduction in the levels of several PSII subunits) and a disrupted grana stack structure. The N-terminal half of the protein contains two tetratricopeptide repeat (TPR) motifs that are arranged tandemly, each consisting of a 34-residue degenerate consensus sequence. The N-terminal sequence is rich in positive and hyd…	LPA1	A3	AT1G02910_JS5	AT1G02910_ID8	WT_3h	WT_0h
AT1G02910	Mutants defective in this gene were shown to have a reduced PSII content (overall reduction in the levels of several PSII subunits) and a disrupted grana stack structure. The N-terminal half of the protein contains two tetratricopeptide repeat (TPR) motifs that are arranged tandemly, each consisting of a 34-residue degenerate consensus sequence. The N-terminal sequence is rich in positive and hyd…	LPA1	A3	AT1G02910_JS5	AT1G02910_P1	WT_3h	WT_0h
AT1G03000	Encodes an apparent ATPase similar to yeast and human protein required for peroxisomal biogenesis. May facilitate recycling of PEX5, the peroxisomal matrix protein receptor, and thereby promote peroxisomal matrix protein import.	PEX6	A5	AT1G03000_ID4	AT1G03000_JS8	WT_3h	WT_0h
AT1G03000	Encodes an apparent ATPase similar to yeast and human protein required for peroxisomal biogenesis. May facilitate recycling of PEX5, the peroxisomal matrix protein receptor, and thereby promote peroxisomal matrix protein import.	PEX6	IR	AT1G03000_ID4	AT1G03000_JS8	WT_3h	WT_0h
AT1G03590	Protein phosphatase 2C family protein;(source:Araport11)	NA	A5	AT1G03590_P1	AT1G03590_JS7	WT_3h	WT_0h
AT1G05200	Encodes a putative glutamate receptor GLR3 with dual localization in plastid and plasma membrane.	ATGLR3.4,GLR3.4,GLUR3	A3	AT1G05200_P6	AT1G05200.2	WT_3h	WT_0h
AT1G05200	Encodes a putative glutamate receptor GLR3 with dual localization in plastid and plasma membrane.	ATGLR3.4,GLR3.4,GLUR3	A5	AT1G05200_P6	AT1G05200.2	WT_3h	WT_0h
AT1G05230	Encodes a homeobox-leucine zipper family protein belonging to the HD-ZIP IV family. Mutants have trichomes that appear glass-like under a dissecting microscope as compared to the wild-type trichomes. The mutations do not affect trichome growth or branch number.	HDG2	A5	AT1G05230.4	AT1G05230_ID8	WT_3h	WT_0h
AT1G05230	Encodes a homeobox-leucine zipper family protein belonging to the HD-ZIP IV family. Mutants have trichomes that appear glass-like under a dissecting microscope as compared to the wild-type trichomes. The mutations do not affect trichome growth or branch number.	HDG2	ES	AT1G05230.4	AT1G05230_ID8	WT_3h	WT_0h
AT1G05230	Encodes a homeobox-leucine zipper family protein belonging to the HD-ZIP IV family. Mutants have trichomes that appear glass-like under a dissecting microscope as compared to the wild-type trichomes. The mutations do not affect trichome growth or branch number.	HDG2	IR	AT1G05230.4	AT1G05230_ID8	WT_3h	WT_0h
AT1G05230	Encodes a homeobox-leucine zipper family protein belonging to the HD-ZIP IV family. Mutants have trichomes that appear glass-like under a dissecting microscope as compared to the wild-type trichomes. The mutations do not affect trichome growth or branch number.	HDG2	A5	AT1G05230.4	AT1G05230_JC3	WT_3h	WT_0h
AT1G05230	Encodes a homeobox-leucine zipper family protein belonging to the HD-ZIP IV family. Mutants have trichomes that appear glass-like under a dissecting microscope as compared to the wild-type trichomes. The mutations do not affect trichome growth or branch number.	HDG2	ES	AT1G05230.4	AT1G05230_JC3	WT_3h	WT_0h
AT1G05230	Encodes a homeobox-leucine zipper family protein belonging to the HD-ZIP IV family. Mutants have trichomes that appear glass-like under a dissecting microscope as compared to the wild-type trichomes. The mutations do not affect trichome growth or branch number.	HDG2	IR	AT1G05230.4	AT1G05230_JC3	WT_3h	WT_0h
AT1G05230	Encodes a homeobox-leucine zipper family protein belonging to the HD-ZIP IV family. Mutants have trichomes that appear glass-like under a dissecting microscope as compared to the wild-type trichomes. The mutations do not affect trichome growth or branch number.	HDG2	A5	AT1G05230.4	AT1G05230_P1	WT_3h	WT_0h
AT1G05230	Encodes a homeobox-leucine zipper family protein belonging to the HD-ZIP IV family. Mutants have trichomes that appear glass-like under a dissecting microscope as compared to the wild-type trichomes. The mutations do not affect trichome growth or branch number.	HDG2	IR	AT1G05230.4	AT1G05230_P1	WT_3h	WT_0h
AT1G05785	Got1/Sft2-like vescicle transport protein family;(source:Araport11)	NA	A3	AT1G05785_P5	AT1G05785_P1	WT_3h	WT_0h
AT1G05785	Got1/Sft2-like vescicle transport protein family;(source:Araport11)	NA	IR	AT1G05785_P5	AT1G05785_P1	WT_3h	WT_0h
AT1G05840	Eukaryotic aspartyl protease family protein;(source:Araport11)	NA	IR	AT1G05840_P1	AT1G05840_ID6	WT_3h	WT_0h
AT1G05870	hypothetical protein (DUF1685);(source:Araport11)	NA	IR	AT1G05870_P2	AT1G05870_s5	WT_3h	WT_0h
AT1G05900	endonuclease III 2;(source:Araport11)	ATNTH2,NTH2	IR	AT1G05900_ID9	AT1G05900_c1	WT_3h	WT_0h
AT1G05900	endonuclease III 2;(source:Araport11)	ATNTH2,NTH2	IR	AT1G05900_ID9	AT1G05900_c2	WT_3h	WT_0h
AT1G06050	ENHANCED DISEASE RESISTANCE-like protein (DUF1336);(source:Araport11)	NA	A5	AT1G06050_c1	AT1G06050_P1	WT_3h	WT_0h
AT1G07440	NAD(P)-binding Rossmann-fold superfamily protein;(source:Araport11)	NA	IR	AT1G07440_P1	AT1G07440_ID2	WT_3h	WT_0h
AT1G07728	Natural antisense transcript overlaps with AT1G07725;(source:Araport11)	NA	IR	AT1G07728_ID2	AT1G07728_ID1	WT_3h	WT_0h
AT1G08550	Violaxanthin deepoxidase involved in xanthophyll cycle.Two major consequences of the npq1 mutation are the absence of zeaxanthin formation in strong light and the partial inhibition of the quenching of singlet excited chlorophylls in the photosystem II light-harvesting complex	AVDE1,NPQ1	A3	AT1G08550_ID11	AT1G08550.1	WT_3h	WT_0h
AT1G08630	Encodes a threonine aldolase, involved in threonine degradation to glycine. Primarily expressed in seeds and seedlings.	THA1	A5	AT1G08630_JC3	AT1G08630.2	WT_3h	WT_0h
AT1G08630	Encodes a threonine aldolase, involved in threonine degradation to glycine. Primarily expressed in seeds and seedlings.	THA1	A5	AT1G08630_JC3	AT1G08630_P1	WT_3h	WT_0h
AT1G08900	Major facilitator superfamily protein;(source:Araport11)	NA	IR	AT1G08900_P4	AT1G08900.1	WT_3h	WT_0h
AT1G08900	Major facilitator superfamily protein;(source:Araport11)	NA	IR	AT1G08900_P4	AT1G08900_P2	WT_3h	WT_0h
AT1G09140	Encodes a serine-arginine rich RNA binding protein involved in regulation of splicing (including splicing of itself). Exists as 3 alternative spliced forms that are differentially expressed. AT1G09140.1 predominantly accumulates in the cytosol in light grown plants.Barta et al (2010) have proposed a nomenclature for Serine/Arginine-Rich Protein Splicing Factors (SR proteins): Plant Cell. 2010, 22…	At-SR30,ATSRP30,SR30	A3	AT1G09140_P2	AT1G09140_P1	WT_3h	WT_0h
AT1G09530	Transcription factor interacting with photoreceptors phyA and phyB. Forms a ternary complex in vitro with G-box element of the promoters of LHY, CCA1. Acts as a negative regulator of phyB signalling. It degrades rapidly after irradiation of dark grown seedlings in a process controlled by phytochromes. Does not play a significant role in controlling light input and function of the circadian clockw…	PAP3,PIF3	A5	AT1G09530_P2	AT1G09530_P1	WT_3h	WT_0h
AT1G09530	Transcription factor interacting with photoreceptors phyA and phyB. Forms a ternary complex in vitro with G-box element of the promoters of LHY, CCA1. Acts as a negative regulator of phyB signalling. It degrades rapidly after irradiation of dark grown seedlings in a process controlled by phytochromes. Does not play a significant role in controlling light input and function of the circadian clockw…	PAP3,PIF3	IR	AT1G09530_P2	AT1G09530_P3	WT_3h	WT_0h
AT1G09890	Rhamnogalacturonate lyase family protein;(source:Araport11)	NA	A3	AT1G09890_P4	AT1G09890_JS1	WT_3h	WT_0h
AT1G10910	Member of the P subfamily of PRR proteins. Loss of function results in defects in abnormal plastid RNA edit and chloroplast biogenesis	EMB3103,PDM2	A3	AT1G10910_ID6	AT1G10910_P1	WT_3h	WT_0h
AT1G10910	Member of the P subfamily of PRR proteins. Loss of function results in defects in abnormal plastid RNA edit and chloroplast biogenesis	EMB3103,PDM2	IR	AT1G10910_ID6	AT1G10910_P1	WT_3h	WT_0h
AT1G10910	Member of the P subfamily of PRR proteins. Loss of function results in defects in abnormal plastid RNA edit and chloroplast biogenesis	EMB3103,PDM2	A3	AT1G10910_ID6	AT1G10910_P2	WT_3h	WT_0h
AT1G11130	Encodes an atypical receptor-like kinase protein with a predicted extracellular domain of six leucine-rich repeats and an intracellular serine-threonine kinase domain expressed throughout the developing root but whose kinase activity is not essential for its function in vivo. Regulates expression of GLABRA2, CAPRICE, WEREWOLF, and ENHANCER OF GLABRA3. Required for floral organ shape, the developm…	SCM,SRF9,SUB	IR	AT1G11130_P2	AT1G11130_P1	WT_3h	WT_0h
AT1G11650	Encodes an RNA binding protein with three RNA recognition motifs. The mRNA is cell-to-cell mobile.	ATRBP45B,RBP45B	ES	AT1G11650_c1	AT1G11650_P2	WT_3h	WT_0h
AT1G12250	Pentapeptide repeat-containing protein;(source:Araport11)	TL20.3	A3	AT1G12250.2	AT1G12250_P1	WT_3h	WT_0h
AT1G13860	Encodes QUASIMODO2 LIKE1 (QUL1), a paralog of QUASIMODO2 (QUA2). AT1G78240 (QUA2), AT1G13860 (QUL1) and AT2G03480 (QUL2) form a clade with a possible role in plant vasculature development.	QUL1	A3	AT1G13860_JS3	AT1G13860.4	WT_3h	WT_0h
AT1G13860	Encodes QUASIMODO2 LIKE1 (QUL1), a paralog of QUASIMODO2 (QUA2). AT1G78240 (QUA2), AT1G13860 (QUL1) and AT2G03480 (QUL2) form a clade with a possible role in plant vasculature development.	QUL1	A5	AT1G13860_JS3	AT1G13860.4	WT_3h	WT_0h
AT1G13860	Encodes QUASIMODO2 LIKE1 (QUL1), a paralog of QUASIMODO2 (QUA2). AT1G78240 (QUA2), AT1G13860 (QUL1) and AT2G03480 (QUL2) form a clade with a possible role in plant vasculature development.	QUL1	A5	AT1G13860_JS3	AT1G13860_P3	WT_3h	WT_0h
AT1G14770	RING/FYVE/PHD zinc finger superfamily protein;(source:Araport11)	NA	IR	AT1G14770_ID3	AT1G14770_c1	WT_3h	WT_0h
AT1G14770	RING/FYVE/PHD zinc finger superfamily protein;(source:Araport11)	NA	A5	AT1G14770_ID3	AT1G14770_P1	WT_3h	WT_0h
AT1G14770	RING/FYVE/PHD zinc finger superfamily protein;(source:Araport11)	NA	IR	AT1G14770_ID3	AT1G14770_P1	WT_3h	WT_0h
AT1G16610	Encodes SR45, a member of the highly conserved family of serine/arginine-rich (SR) proteins, which play key roles in pre-mRNA splicing and other aspects of RNA metabolism. SR45 is a spliceosome protein, interacts with SR33 and the U1-70K protein of the U1 snRNP. Also involved in plant sugar response. sr45-1 mutation confers hypersensitivity to glucose during early seedling growth.	AtSR45,RNPS1,SR45	A5	AT1G16610_P6	AT1G16610_P1	WT_3h	WT_0h
AT1G16610	Encodes SR45, a member of the highly conserved family of serine/arginine-rich (SR) proteins, which play key roles in pre-mRNA splicing and other aspects of RNA metabolism. SR45 is a spliceosome protein, interacts with SR33 and the U1-70K protein of the U1 snRNP. Also involved in plant sugar response. sr45-1 mutation confers hypersensitivity to glucose during early seedling growth.	AtSR45,RNPS1,SR45	IR	AT1G16610_P6	AT1G16610_P1	WT_3h	WT_0h
AT1G17145	RING/U-box superfamily protein;(source:Araport11)	NA	IR	AT1G17145_P1	AT1G17145_ID4	WT_3h	WT_0h
AT1G17520	Single Myb Histone (SMH) gene family member. Contains terminal acidic SANT domain.	NA	A5	AT1G17520_c2	AT1G17520.1	WT_3h	WT_0h
AT1G19000	Homeodomain-like superfamily protein;(source:Araport11)	NA	A3	AT1G19000_P2	AT1G19000_ID16	WT_3h	WT_0h
AT1G19000	Homeodomain-like superfamily protein;(source:Araport11)	NA	A5	AT1G19000_P2	AT1G19000_ID16	WT_3h	WT_0h
AT1G19340	Methyltransferase MT-A70 family protein;(source:Araport11)	NA	A3	AT1G19340_ID1	AT1G19340_P1	WT_3h	WT_0h
AT1G19340	Methyltransferase MT-A70 family protein;(source:Araport11)	NA	IR	AT1G19340_ID1	AT1G19340_P1	WT_3h	WT_0h
AT1G20920	P-loop containing nucleoside triphosphate hydrolases superfamily protein;(source:Araport11)	RCF1	IR	AT1G20920_P4	AT1G20920_P1	WT_3h	WT_0h
AT1G22430	GroES-like zinc-binding dehydrogenase family protein;(source:Araport11)	NA	IR	AT1G22430_P5	AT1G22430_ID25	WT_3h	WT_0h
AT1G22430	GroES-like zinc-binding dehydrogenase family protein;(source:Araport11)	NA	IR	AT1G22430_P5	AT1G22430_P1	WT_3h	WT_0h
AT1G22890	Secreted peptide which functions in plant growth and pathogen defense.	NA	A5	AT1G22890_P1	AT1G22890_ID2	WT_3h	WT_0h
AT1G22890	Secreted peptide which functions in plant growth and pathogen defense.	NA	A5	AT1G22890_P1	AT1G22890_ID3	WT_3h	WT_0h
AT1G22890	Secreted peptide which functions in plant growth and pathogen defense.	NA	IR	AT1G22890_P1	AT1G22890_ID3	WT_3h	WT_0h
AT1G23860	Encodes a 9G8-like serine-arginine rich (SR) protein that interacts in vivo with U1-70K, a U1 small nuclear ribonucleoprotein 70-kDa protein that is involved in nuclear precursor mRNA processing. Barta et al (2010) have proposed a nomenclature for Serine/Arginine-Rich Protein Splicing Factors (SR proteins): Plant Cell. 2010, 22:2926.	At-RSZ21,RSZ21,RSZP21,SRZ-21,SRZ21	IR	AT1G23860_P1	AT1G23860.2	WT_3h	WT_0h
AT1G24330	Plant U-box type E3 ubiquitin ligase (PUB).	NA	IR	AT1G24330_P1	AT1G24330_ID1	WT_3h	WT_0h
AT1G24330	Plant U-box type E3 ubiquitin ligase (PUB).	NA	A5	AT1G24330_P1	AT1G24330_P2	WT_3h	WT_0h
AT1G28060	Pre-mRNA-splicing factor 3;(source:Araport11)	RDM16	IR	AT1G28060_JC1	AT1G28060.1	WT_3h	WT_0h
AT1G28530	Encodes a protein that localizes to both chloroplasts and amyloplasts and is required for both chloroplast and mesophyll development.	ANU10	A3	AT1G28530.1	AT1G28530_ID2	WT_3h	WT_0h
AT1G28600	GDSL-motif esterase/acyltransferase/lipase. Enzyme group with broad substrate specificity that may catalyze acyltransfer or hydrolase reactions with lipid and non-lipid substrates.	NA	IR	AT1G28600.2	AT1G28600_P1	WT_3h	WT_0h
AT1G30460	Encodes AtCPSF30, the 30-KDa subunit of cleavage and polyadenylation specificity factor. AtCPSF30 is a probable processing endonuclease. Nucleus-localized RNA binding protein capable of interacting with itself and with calmodulin. Its RNA-binding activity is inhibited by calmodulin in a calcium-dependent fashion.	ATCPSF30,CPSF30,OXT6	IR	AT1G30460_P1	AT1G30460_P2	WT_3h	WT_0h
AT1G30640	Ubiquitously expressed protein kinase.	NA	A3	AT1G30640_s2	AT1G30640_s4	WT_3h	WT_0h
AT1G30810	JMJ18 encodes a novel JmjC domain- containing histone H3K4 demethylase. PHD finger-containing protein.	JMJ18	ES	AT1G30810.2	AT1G30810.1	WT_3h	WT_0h
AT1G30810	JMJ18 encodes a novel JmjC domain- containing histone H3K4 demethylase. PHD finger-containing protein.	JMJ18	IR	AT1G30810.2	AT1G30810_JS1	WT_3h	WT_0h
AT1G30810	JMJ18 encodes a novel JmjC domain- containing histone H3K4 demethylase. PHD finger-containing protein.	JMJ18	IR	AT1G30810.2	AT1G30810_P1	WT_3h	WT_0h
AT1G30970	Encodes SUF4 (SUPPRESSOR of FRI 4), a putative zinc-finger-containing transcription factor that is required for delayed flowering in winter-annual Arabidopsis. suf4 mutations strongly suppress the late-flowering phenotype of FRI (FRIGIDA) mutants. suf4 mutants also show reduced H3K4 trimethylation at FLC (FLOWERING LOCUS C), a floral inhibitor. SUF4 may act to specifically recruit a putative hist…	SUF4	IR	AT1G30970_s2	AT1G30970_P1	WT_3h	WT_0h
AT1G32230	Encodes a protein belonging to the (ADP-ribosyl)transferase domain-containing subfamily of WWE protein-protein interaction domain protein family. Superoxide radicals are necessary and sufficient to propagate cell death or lesion formation in rcd1 mutants. Without stress treatment, RCD1 is localized in the nucleus. Under high salt or oxidative stress, RCD1 is found not only in the nucleus but also…	ATP8,AtRCD1,CEO,CEO1,RCD1,RIMB1	A5	AT1G32230_s1	AT1G32230_JS1	WT_3h	WT_0h
AT1G32230	Encodes a protein belonging to the (ADP-ribosyl)transferase domain-containing subfamily of WWE protein-protein interaction domain protein family. Superoxide radicals are necessary and sufficient to propagate cell death or lesion formation in rcd1 mutants. Without stress treatment, RCD1 is localized in the nucleus. Under high salt or oxidative stress, RCD1 is found not only in the nucleus but also…	ATP8,AtRCD1,CEO,CEO1,RCD1,RIMB1	IR	AT1G32230_s1	AT1G32230_JS1	WT_3h	WT_0h
AT1G34630	transmembrane protein;(source:Araport11)	NA	A3	AT1G34630_P1	AT1G34630_P3	WT_3h	WT_0h
AT1G34630	transmembrane protein;(source:Araport11)	NA	IR	AT1G34630_P1	AT1G34630_P3	WT_3h	WT_0h
AT1G35420	alpha/beta-Hydrolases superfamily protein;(source:Araport11)	NA	IR	AT1G35420_P1	AT1G35420_P3	WT_3h	WT_0h
AT1G37150	Although HCS2 is predicted to encode a biotin protein ligase / holocarboxylase synthetase (HCS), hcs2 mutants do not show a decrease in HCS activity. A dual-targeted HCS1 (At2g25710) might account for the HCS activity observed in multiple subcellular compartments in Arabidopsis.	HCS2	A3	AT1G37150_P7	AT1G37150_s1	WT_3h	WT_0h
AT1G37150	Although HCS2 is predicted to encode a biotin protein ligase / holocarboxylase synthetase (HCS), hcs2 mutants do not show a decrease in HCS activity. A dual-targeted HCS1 (At2g25710) might account for the HCS activity observed in multiple subcellular compartments in Arabidopsis.	HCS2	A3	AT1G37150_ID17	AT1G37150_s1	WT_3h	WT_0h
AT1G37150	Although HCS2 is predicted to encode a biotin protein ligase / holocarboxylase synthetase (HCS), hcs2 mutants do not show a decrease in HCS activity. A dual-targeted HCS1 (At2g25710) might account for the HCS activity observed in multiple subcellular compartments in Arabidopsis.	HCS2	A3	AT1G37150.1	AT1G37150_s1	WT_3h	WT_0h
AT1G37150	Although HCS2 is predicted to encode a biotin protein ligase / holocarboxylase synthetase (HCS), hcs2 mutants do not show a decrease in HCS activity. A dual-targeted HCS1 (At2g25710) might account for the HCS activity observed in multiple subcellular compartments in Arabidopsis.	HCS2	A5	AT1G37150_P7	AT1G37150_s1	WT_3h	WT_0h
AT1G37150	Although HCS2 is predicted to encode a biotin protein ligase / holocarboxylase synthetase (HCS), hcs2 mutants do not show a decrease in HCS activity. A dual-targeted HCS1 (At2g25710) might account for the HCS activity observed in multiple subcellular compartments in Arabidopsis.	HCS2	IR	AT1G37150.1	AT1G37150_s1	WT_3h	WT_0h
AT1G37150	Although HCS2 is predicted to encode a biotin protein ligase / holocarboxylase synthetase (HCS), hcs2 mutants do not show a decrease in HCS activity. A dual-targeted HCS1 (At2g25710) might account for the HCS activity observed in multiple subcellular compartments in Arabidopsis.	HCS2	IR	AT1G37150_ID5	AT1G37150_s1	WT_3h	WT_0h
AT1G48030	Encodes a mitochondrial lipoamide dehydrogenase whose expression is induced by light.	mtLPD1	IR	AT1G48030_P1	AT1G48030_P3	WT_3h	WT_0h
AT1G50200	Alanyl-tRNA synthetase;(source:Araport11)	ACD,ALATS	IR	AT1G50200_P1	AT1G50200_ID2	WT_3h	WT_0h
AT1G52100	Mannose-binding lectin superfamily protein;(source:Araport11)	NA	IR	AT1G52100_P2	AT1G52100_P4	WT_3h	WT_0h
AT1G53090	Encodes a member of the SPA (suppressor of phyA-105) protein family (SPA1-SPA4). SPA proteins contain an N-terminal serine/threonine kinase-like motif followed by a coiled-coil structure and a C-terminal WD-repeat domain. SPA proteins function redundantly in suppressing photomorphogenesis in dark- and light-grown seedlings. SPA4 (and SPA3) predominantly regulates elongation growth in adult plants.	SPA4	A5	AT1G53090_P3	AT1G53090_P2	WT_3h	WT_0h
AT1G53090	Encodes a member of the SPA (suppressor of phyA-105) protein family (SPA1-SPA4). SPA proteins contain an N-terminal serine/threonine kinase-like motif followed by a coiled-coil structure and a C-terminal WD-repeat domain. SPA proteins function redundantly in suppressing photomorphogenesis in dark- and light-grown seedlings. SPA4 (and SPA3) predominantly regulates elongation growth in adult plants.	SPA4	IR	AT1G53090_P3	AT1G53090_P2	WT_3h	WT_0h
AT1G53390	P-loop containing nucleoside triphosphate hydrolases superfamily protein;(source:Araport11)	ABCG24	A5	AT1G53390_JS2	AT1G53390_P1	WT_3h	WT_0h
AT1G53510	Member of MAP Kinase familly. Target of MPKKK20 phosphorylation. Mutant root growth is sensitive oryzalin and suggestive of a role in signaling during microtubule organization.	ATMPK18,MPK18	A3	AT1G53510_c2	AT1G53510_P1	WT_3h	WT_0h
AT1G53510	Member of MAP Kinase familly. Target of MPKKK20 phosphorylation. Mutant root growth is sensitive oryzalin and suggestive of a role in signaling during microtubule organization.	ATMPK18,MPK18	ES	AT1G53510_c2	AT1G53510_P1	WT_3h	WT_0h
AT1G53510	Member of MAP Kinase familly. Target of MPKKK20 phosphorylation. Mutant root growth is sensitive oryzalin and suggestive of a role in signaling during microtubule organization.	ATMPK18,MPK18	IR	AT1G53510_c2	AT1G53510_P1	WT_3h	WT_0h
AT1G54440	Rrp6-like protein, controls RNA-directed DNA methylation by helping with the retention of noncoding RNAs in normal cells.	AAtrimmer1,AtRRP6L1,RRP6L1	A3	AT1G54440_ID2	AT1G54440_s2	WT_3h	WT_0h
AT1G54440	Rrp6-like protein, controls RNA-directed DNA methylation by helping with the retention of noncoding RNAs in normal cells.	AAtrimmer1,AtRRP6L1,RRP6L1	A3	AT1G54440_JS3	AT1G54440_s2	WT_3h	WT_0h
AT1G54440	Rrp6-like protein, controls RNA-directed DNA methylation by helping with the retention of noncoding RNAs in normal cells.	AAtrimmer1,AtRRP6L1,RRP6L1	A5	AT1G54440_JS3	AT1G54440_s2	WT_3h	WT_0h
AT1G54440	Rrp6-like protein, controls RNA-directed DNA methylation by helping with the retention of noncoding RNAs in normal cells.	AAtrimmer1,AtRRP6L1,RRP6L1	IR	AT1G54440_JS3	AT1G54440_s2	WT_3h	WT_0h
AT1G54440	Rrp6-like protein, controls RNA-directed DNA methylation by helping with the retention of noncoding RNAs in normal cells.	AAtrimmer1,AtRRP6L1,RRP6L1	IR	AT1G54440_ID2	AT1G54440_s2	WT_3h	WT_0h
AT1G55310	Encodes a SR spliceosome protein that is localized to nuclear specks, interacts with SR45 and the U1-70K protein of the U1 snRNP, has sequence similar to human SC35 protein. Barta et al (2010) have proposed a nomenclature for Serine/Arginine-Rich Protein Splicing Factors (SR proteins): Plant Cell. 2010, 22:2926.	At-SCL33,ATSCL33,SCL33,SR33	ES	AT1G55310_P4	AT1G55310_P1	WT_3h	WT_0h
AT1G55310	Encodes a SR spliceosome protein that is localized to nuclear specks, interacts with SR45 and the U1-70K protein of the U1 snRNP, has sequence similar to human SC35 protein. Barta et al (2010) have proposed a nomenclature for Serine/Arginine-Rich Protein Splicing Factors (SR proteins): Plant Cell. 2010, 22:2926.	At-SCL33,ATSCL33,SCL33,SR33	IR	AT1G55310_P4	AT1G55310_P1	WT_3h	WT_0h
AT1G55340	hypothetical protein (DUF1639);(source:Araport11)	NA	A3	AT1G55340_c2	AT1G55340.1	WT_3h	WT_0h
AT1G55340	hypothetical protein (DUF1639);(source:Araport11)	NA	A5	AT1G55340_c2	AT1G55340.1	WT_3h	WT_0h
AT1G55340	hypothetical protein (DUF1639);(source:Araport11)	NA	A3	AT1G55340_ID9	AT1G55340.2	WT_3h	WT_0h
AT1G55340	hypothetical protein (DUF1639);(source:Araport11)	NA	A5	AT1G55340_ID9	AT1G55340.2	WT_3h	WT_0h
AT1G55340	hypothetical protein (DUF1639);(source:Araport11)	NA	A5	AT1G55340_c2	AT1G55340.2	WT_3h	WT_0h
AT1G55340	hypothetical protein (DUF1639);(source:Araport11)	NA	IR	AT1G55340_ID9	AT1G55340.2	WT_3h	WT_0h
AT1G55475	hypothetical protein;(source:Araport11)	NA	A3	AT1G55475_s1	AT1G55475_P2	WT_3h	WT_0h
AT1G55475	hypothetical protein;(source:Araport11)	NA	IR	AT1G55475_s1	AT1G55475_P2	WT_3h	WT_0h
AT1G55475	hypothetical protein;(source:Araport11)	NA	IR	AT1G55475_ID8	AT1G55475_P2	WT_3h	WT_0h
AT1G55880	Pyridoxal-5-phosphate-dependent enzyme family protein;(source:Araport11)	NA	A3	AT1G55880_ID1	AT1G55880.1	WT_3h	WT_0h
AT1G58602	LRR and NB-ARC domains-containing disease resistance protein;(source:Araport11)	RPP7	A3	AT1G58602_JS22	AT1G58602_JC7	WT_3h	WT_0h
AT1G58602	LRR and NB-ARC domains-containing disease resistance protein;(source:Araport11)	RPP7	A5	AT1G58602_JS22	AT1G58602_JC7	WT_3h	WT_0h
AT1G58602	LRR and NB-ARC domains-containing disease resistance protein;(source:Araport11)	RPP7	ES	AT1G58602_JS22	AT1G58602_JC7	WT_3h	WT_0h
AT1G58602	LRR and NB-ARC domains-containing disease resistance protein;(source:Araport11)	RPP7	IR	AT1G58602_JS22	AT1G58602_JC7	WT_3h	WT_0h
AT1G58807	Disease resistance protein (CC-NBS-LRR class) family;(source:Araport11)	NA	A5	AT1G58807_P2	AT1G58807_P1	WT_3h	WT_0h
AT1G58807	Disease resistance protein (CC-NBS-LRR class) family;(source:Araport11)	NA	IR	AT1G58807_P2	AT1G58807_P1	WT_3h	WT_0h
AT1G59218	Similar to disease resistance proteins.	NA	A3	AT1G59218_s2	AT1G59218_P1	WT_3h	WT_0h
AT1G59218	Similar to disease resistance proteins.	NA	IR	AT1G59218_s2	AT1G59218_P1	WT_3h	WT_0h
AT1G60200	RBM25 is an alternative splicing factor involved in mediation of abiotic stress response and ABA response. Its expression is modulated by a variety of stressors and it in turn appears to affect the ratio of splice variants of stress responsive genes such as HAB1.2/HAB1.1.	RBM25	ES	AT1G60200_P2	AT1G60200_P1	WT_3h	WT_0h
AT1G60200	RBM25 is an alternative splicing factor involved in mediation of abiotic stress response and ABA response. Its expression is modulated by a variety of stressors and it in turn appears to affect the ratio of splice variants of stress responsive genes such as HAB1.2/HAB1.1.	RBM25	IR	AT1G60200_P2	AT1G60200_P1	WT_3h	WT_0h
AT1G60200	RBM25 is an alternative splicing factor involved in mediation of abiotic stress response and ABA response. Its expression is modulated by a variety of stressors and it in turn appears to affect the ratio of splice variants of stress responsive genes such as HAB1.2/HAB1.1.	RBM25	IR	AT1G60200_P2	AT1G60200_P3	WT_3h	WT_0h
AT1G60505	Natural antisense transcript overlaps with AT1G60510;(source:Araport11)	NA	A3	AT1G60505_ID4	AT1G60505_c1	WT_3h	WT_0h
AT1G60505	Natural antisense transcript overlaps with AT1G60510;(source:Araport11)	NA	A3	AT1G60505_ID4	AT1G60505_ID5	WT_3h	WT_0h
AT1G60505	Natural antisense transcript overlaps with AT1G60510;(source:Araport11)	NA	A5	AT1G60505_ID4	AT1G60505_ID5	WT_3h	WT_0h
AT1G60560	SWIM zinc finger family protein;(source:Araport11)	NA	IR	AT1G60560_P2	AT1G60560_P1	WT_3h	WT_0h
AT1G60600	Encodes a protein similar to 1,4-dihydroxy-2-naphthoic acid phytyltransferase involved in phylloquinone and plastoquinone biosynthesis. Mutants are pale green and heterotrophic with defects in photosynthetic electron transport.	ABC4	A3	AT1G60600.1	AT1G60600_P2	WT_3h	WT_0h
AT1G60900	Putative U2A65 splicing factor which functions in abscisic acid mediated flowering via regulating the precursor messenger RNA splicing of ABI5 and FLC in shoot apex. Regulates flowering time and displays a redundant role in pollen tube growth together with AtU2AF65a.	ATU2AF65B,U2AF65b	A5	AT1G60900_ID13	AT1G60900_P1	WT_3h	WT_0h
AT1G60900	Putative U2A65 splicing factor which functions in abscisic acid mediated flowering via regulating the precursor messenger RNA splicing of ABI5 and FLC in shoot apex. Regulates flowering time and displays a redundant role in pollen tube growth together with AtU2AF65a.	ATU2AF65B,U2AF65b	ES	AT1G60900_ID13	AT1G60900_P1	WT_3h	WT_0h
AT1G60900	Putative U2A65 splicing factor which functions in abscisic acid mediated flowering via regulating the precursor messenger RNA splicing of ABI5 and FLC in shoot apex. Regulates flowering time and displays a redundant role in pollen tube growth together with AtU2AF65a.	ATU2AF65B,U2AF65b	IR	AT1G60900_ID13	AT1G60900_P1	WT_3h	WT_0h
AT1G61065	1,3-beta-glucan synthase component (DUF1218);(source:Araport11)	NA	IR	AT1G61065_s1	AT1G61065_P1	WT_3h	WT_0h
AT1G61210	DWA3 encodes a DWD(DDB1 binding WD40) protein. Invitro analyses suggest its involvement in the negative regulation of ABA responses.One of four katanin p80 subunits. Involved in targeting of katanin complex to crossover and branch points to properly sever microtubules.	DWA3,KTN80.2	A3	AT1G61210_JS3	AT1G61210_P2	WT_3h	WT_0h
AT1G61210	DWA3 encodes a DWD(DDB1 binding WD40) protein. Invitro analyses suggest its involvement in the negative regulation of ABA responses.One of four katanin p80 subunits. Involved in targeting of katanin complex to crossover and branch points to properly sever microtubules.	DWA3,KTN80.2	A3	AT1G61210.1	AT1G61210_P2	WT_3h	WT_0h
AT1G61280	Phosphatidylinositol N-acetylglucosaminyltransferase, GPI19/PIG-P subunit;(source:Araport11)	NA	IR	AT1G61280_ID2	AT1G61280.1	WT_3h	WT_0h
AT1G61640	Protein kinase superfamily protein;(source:Araport11)	NA	IR	AT1G61640_P2	AT1G61640_ID4	WT_3h	WT_0h
AT1G61660	Encodes a transcriptional activator that regulates the expression of genes by binding to their GCG- or E-boxes to mediate physiological responses, including proline biosynthesis and ROS scavenging pathways, to enhance stress tolerance. Governs the competence of pericycle cells to initiate lateral root primordium formation.	AtbHLH112	A5	AT1G61660.2	AT1G61660_P1	WT_3h	WT_0h
AT1G61660	Encodes a transcriptional activator that regulates the expression of genes by binding to their GCG- or E-boxes to mediate physiological responses, including proline biosynthesis and ROS scavenging pathways, to enhance stress tolerance. Governs the competence of pericycle cells to initiate lateral root primordium formation.	AtbHLH112	IR	AT1G61660.2	AT1G61660_P1	WT_3h	WT_0h
AT1G63420	O-glucosyltransferase-like protein (DUF821);(source:Araport11)	NA	ES	AT1G63420_ID1	AT1G63420_P1	WT_3h	WT_0h
AT1G63420	O-glucosyltransferase-like protein (DUF821);(source:Araport11)	NA	IR	AT1G63420_ID1	AT1G63420_P1	WT_3h	WT_0h
AT1G63770	Peptidase M1 family protein;(source:Araport11)	NA	ES	AT1G63770_P7	AT1G63770_P5	WT_3h	WT_0h
AT1G63770	Peptidase M1 family protein;(source:Araport11)	NA	IR	AT1G63770_P7	AT1G63770_P5	WT_3h	WT_0h
AT1G64090	Reticulan like protein B3;(source:Araport11)	RTN3,RTNLB3	IR	AT1G64090_c1	AT1G64090_P1	WT_3h	WT_0h
AT1G66980	Encodes SNC4 (suppressor of npr1-1, constitutive 4), an atypical receptor-like kinase with two predicted extracellular glycerophosphoryl diester phosphodiesterase domains.	GDPDL2,SNC4	IR	AT1G66980_P1	AT1G66980_P2	WT_3h	WT_0h
AT1G66980	Encodes SNC4 (suppressor of npr1-1, constitutive 4), an atypical receptor-like kinase with two predicted extracellular glycerophosphoryl diester phosphodiesterase domains.	GDPDL2,SNC4	A5	AT1G66980_P1	AT1G66980_P3	WT_3h	WT_0h
AT1G66980	Encodes SNC4 (suppressor of npr1-1, constitutive 4), an atypical receptor-like kinase with two predicted extracellular glycerophosphoryl diester phosphodiesterase domains.	GDPDL2,SNC4	IR	AT1G66980_P1	AT1G66980_P3	WT_3h	WT_0h
AT1G69980	structural polyprotein;(source:Araport11)	NA	IR	AT1G69980_P1	AT1G69980_c1	WT_3h	WT_0h
AT1G69980	structural polyprotein;(source:Araport11)	NA	IR	AT1G69980_P1	AT1G69980_ID2	WT_3h	WT_0h
AT1G71696	Encodes a Putative Zn2+ carboxypeptidase, 4 splice variants have been identified but not characterized for different functions and/or expression patterns.SOL1 isolated as a suppressor of root- specific overexpression of CLE19, a clavata3 like gene. sol1 partially suppresses the short root phenotype caused by CLE19 overexpression.	SOL1	A3	AT1G71696_P2	AT1G71696_JS4	WT_3h	WT_0h
AT1G72190	D-isomer specific 2-hydroxyacid dehydrogenase family protein;(source:Araport11)	NA	A3	AT1G72190_P1	AT1G72190_ID51	WT_3h	WT_0h
AT1G72320	Encodes a member of the Arabidopsis Pumilio (APUM) proteins containing PUF domain (eight repeats of approximately 36 amino acids each). PUF proteins regulate both mRNA stability and translation through sequence-specific binding to the 3' UTR of target mRNA transcripts.	APUM23,PUM23	A3	AT1G72320_ID7	AT1G72320_P4	WT_3h	WT_0h
AT1G72450	JAZ6 transcript levels rise in response to a jasmonate stimulus and a GFP:JAZ6 fusion protein localizes to the nucleus. Application of jasmonate methyl ester to Arabidopsis roots reduces the levels of a JAZ6:GUS fusion protein, presumably by stimulating ubiquitin-proteasome-mediated degradation.	JAZ6,TIFY11B	IR	AT1G72450_s1	AT1G72450_P1	WT_3h	WT_0h
AT1G72990	beta-galactosidase 17;(source:Araport11)	BGAL17	A3	AT1G72990_JC5	AT1G72990_P1	WT_3h	WT_0h
AT1G72990	beta-galactosidase 17;(source:Araport11)	BGAL17	A3	AT1G72990_JC5	AT1G72990_s2	WT_3h	WT_0h
AT1G73350	ankyrin repeat protein;(source:Araport11)	NA	A3	AT1G73350_ID9	AT1G73350_ID4	WT_3h	WT_0h
AT1G73920	alpha/beta-Hydrolases superfamily protein;(source:Araport11)	NA	IR	AT1G73920_P1	AT1G73920_ID4	WT_3h	WT_0h
AT1G74200	receptor like protein 16;(source:Araport11)	AtRLP16,RLP16	IR	AT1G74200_P3	AT1G74200_c1	WT_3h	WT_0h
AT1G75860	DNA ligase;(source:Araport11)	NA	IR	AT1G75860_P2	AT1G75860_ID1	WT_3h	WT_0h
AT1G76900	Member of plant TLP family. Contains terminal F-box domain, interacts with ASK proteins. Tethered to the PM.	AtTLP1,TLP1	A5	AT1G76900_P2	AT1G76900.1	WT_3h	WT_0h
AT1G76990	ACT domain repeat 3;(source:Araport11)	ACR3	A5	AT1G76990_P1	AT1G76990_P3	WT_3h	WT_0h
AT1G76990	ACT domain repeat 3;(source:Araport11)	ACR3	IR	AT1G76990_P1	AT1G76990_P3	WT_3h	WT_0h
AT1G77000	AtSKP2;2 is a homolog of human SKP2, the human F-box protein that recruits E2F1. Contains an F-box motif at the N-terminal region and a C-terminal Leu-rich repeat domain. Forms part of an E3-ubiquitin-ligase SCF (Skp1, cullin, F-box) complex and recruits phosphorylated AtE2Fc, a transcriptional factor that might play a role in cell division and during the transition from skotomorphogenesis to pho…	ATSKP22,SKP2B	A5	AT1G77000_P1	AT1G77000_P2	WT_3h	WT_0h
AT1G77000	AtSKP2;2 is a homolog of human SKP2, the human F-box protein that recruits E2F1. Contains an F-box motif at the N-terminal region and a C-terminal Leu-rich repeat domain. Forms part of an E3-ubiquitin-ligase SCF (Skp1, cullin, F-box) complex and recruits phosphorylated AtE2Fc, a transcriptional factor that might play a role in cell division and during the transition from skotomorphogenesis to pho…	ATSKP22,SKP2B	IR	AT1G77000_P1	AT1G77000_P2	WT_3h	WT_0h
AT1G77460	Encodes a plasma membrane, microtubule associated protein with sequence similarity to CSI1 that is involved in cellulose biosynthesis and cell elongation. A mutation in CSI3 alone do not appear to affect growth but enhances the cell elongation phenotype of CSI1 mutants. CSI3 co localizes with CSI1 and CESA3 and CESA6.	CSI3	A3	AT1G77460_P2	AT1G77460_JS3	WT_3h	WT_0h
AT1G77460	Encodes a plasma membrane, microtubule associated protein with sequence similarity to CSI1 that is involved in cellulose biosynthesis and cell elongation. A mutation in CSI3 alone do not appear to affect growth but enhances the cell elongation phenotype of CSI1 mutants. CSI3 co localizes with CSI1 and CESA3 and CESA6.	CSI3	A5	AT1G77460_P2	AT1G77460_JS3	WT_3h	WT_0h
AT1G77460	Encodes a plasma membrane, microtubule associated protein with sequence similarity to CSI1 that is involved in cellulose biosynthesis and cell elongation. A mutation in CSI3 alone do not appear to affect growth but enhances the cell elongation phenotype of CSI1 mutants. CSI3 co localizes with CSI1 and CESA3 and CESA6.	CSI3	IR	AT1G77460_P2	AT1G77460_JS3	WT_3h	WT_0h
AT1G77480	Eukaryotic aspartyl protease family protein;(source:Araport11)	NA	IR	AT1G77480_P2	AT1G77480_ID4	WT_3h	WT_0h
AT1G77480	Eukaryotic aspartyl protease family protein;(source:Araport11)	NA	IR	AT1G77480_P2	AT1G77480_P1	WT_3h	WT_0h
AT1G78270	UDP-glucosyl transferase 85A4;(source:Araport11)	AtUGT85A4,UGT85A4	IR	AT1G78270.1	AT1G78270_ID1	WT_3h	WT_0h
AT1G79880	RNA recognition motif (RRM)-containing protein;(source:Araport11)	AtLa2,La2	IR	AT1G79880_P1	AT1G79880_P2	WT_3h	WT_0h
AT1G80030	Molecular chaperone Hsp40/DnaJ family protein;(source:Araport11)	DJA7	A5	AT1G80030_s1	AT1G80030_ID4	WT_3h	WT_0h
AT1G80380	encodes a glycerate kinase which catalyzes the last step of photorespiration C2 cycle.	GLYK	A5	AT1G80380_P3	AT1G80380_P2	WT_3h	WT_0h
AT1G80500	Part of multi-protein complex, acting as guanine nucleotide exchange factors (GEFs) and possibly as tethers, regulating intracellular trafficking.	NA	A3	AT1G80500_P1	AT1G80500_s1	WT_3h	WT_0h
AT1G80780	Deadenylase.	NA	IR	AT1G80780_P1	AT1G80780_P2	WT_3h	WT_0h
AT2G02080	C2H2 BIRD transcription factor family.	AtIDD4,IDD4,IME	A5	AT2G02080_P3	AT2G02080_P1	WT_3h	WT_0h
AT2G02080	C2H2 BIRD transcription factor family.	AtIDD4,IDD4,IME	IR	AT2G02080_P3	AT2G02080_P1	WT_3h	WT_0h
AT2G02080	C2H2 BIRD transcription factor family.	AtIDD4,IDD4,IME	A5	AT2G02080_P3	AT2G02080_P4	WT_3h	WT_0h
AT2G02080	C2H2 BIRD transcription factor family.	AtIDD4,IDD4,IME	IR	AT2G02080_P3	AT2G02080_P4	WT_3h	WT_0h
AT2G14835	RING/U-box superfamily protein;(source:Araport11)	NA	IR	AT2G14835_P1	AT2G14835_P2	WT_3h	WT_0h
AT2G16405	Transducin/WD40 repeat-like superfamily protein;(source:Araport11)	NA	A3	AT2G16405_c5	AT2G16405_P1	WT_3h	WT_0h
AT2G16405	Transducin/WD40 repeat-like superfamily protein;(source:Araport11)	NA	IR	AT2G16405_c5	AT2G16405_P1	WT_3h	WT_0h
AT2G16980	Major facilitator superfamily protein;(source:Araport11)	NA	IR	AT2G16980_ID2	AT2G16980_P3	WT_3h	WT_0h
AT2G16990	Major facilitator superfamily protein;(source:Araport11)	NA	IR	AT2G16990_P2	AT2G16990_P1	WT_3h	WT_0h
AT2G17150	Plant regulator RWP-RK family protein;(source:Araport11)	NLP1	A5	AT2G17150_P5	AT2G17150_P3	WT_3h	WT_0h
AT2G17150	Plant regulator RWP-RK family protein;(source:Araport11)	NLP1	A5	AT2G17150_P5	AT2G17150_P4	WT_3h	WT_0h
AT2G17150	Plant regulator RWP-RK family protein;(source:Araport11)	NLP1	IR	AT2G17150_P5	AT2G17150_P4	WT_3h	WT_0h
AT2G17150	Plant regulator RWP-RK family protein;(source:Araport11)	NLP1	A5	AT2G17150_P5	AT2G17150_P6	WT_3h	WT_0h
AT2G17150	Plant regulator RWP-RK family protein;(source:Araport11)	NLP1	IR	AT2G17150_P5	AT2G17150_P6	WT_3h	WT_0h
AT2G22650	FAD-dependent oxidoreductase family protein;(source:Araport11)	NA	IR	AT2G22650_P1	AT2G22650_ID24	WT_3h	WT_0h
AT2G22650	FAD-dependent oxidoreductase family protein;(source:Araport11)	NA	IR	AT2G22650_P3	AT2G22650_ID24	WT_3h	WT_0h
AT2G23590	Encodes a protein shown to have carboxylesterase activity in vitro. It has similarity to the SABP2 methyl salicylate esterase from tobacco. This protein does not act on methyl IAA, methyl JA, MeSA, MeGA4, or MEGA9 in vitro.	ATMES8,MES8	A5	AT2G23590_c1	AT2G23590_ID2	WT_3h	WT_0h
AT2G23590	Encodes a protein shown to have carboxylesterase activity in vitro. It has similarity to the SABP2 methyl salicylate esterase from tobacco. This protein does not act on methyl IAA, methyl JA, MeSA, MeGA4, or MEGA9 in vitro.	ATMES8,MES8	IR	AT2G23590_c1	AT2G23590_ID2	WT_3h	WT_0h
AT2G23910	NAD(P)-binding Rossmann-fold superfamily protein;(source:Araport11)	NA	A3	AT2G23910_c1	AT2G23910_P2	WT_3h	WT_0h
AT2G23910	NAD(P)-binding Rossmann-fold superfamily protein;(source:Araport11)	NA	A3	AT2G23910_P1	AT2G23910_P2	WT_3h	WT_0h
AT2G23910	NAD(P)-binding Rossmann-fold superfamily protein;(source:Araport11)	NA	A5	AT2G23910_c1	AT2G23910_P2	WT_3h	WT_0h
AT2G23910	NAD(P)-binding Rossmann-fold superfamily protein;(source:Araport11)	NA	IR	AT2G23910_P3	AT2G23910_P2	WT_3h	WT_0h
AT2G23910	NAD(P)-binding Rossmann-fold superfamily protein;(source:Araport11)	NA	IR	AT2G23910_P1	AT2G23910_P2	WT_3h	WT_0h
AT2G23910	NAD(P)-binding Rossmann-fold superfamily protein;(source:Araport11)	NA	IR	AT2G23910_c1	AT2G23910_P2	WT_3h	WT_0h
AT2G25355	PNAS-3-like protein;(source:Araport11)	NA	IR	AT2G25355_ID44	AT2G25355_c1	WT_3h	WT_0h
AT2G25620	Encodes DBP1, a member of the DBP factors (DNA-binding protein phosphatases) featuring sequence-specific DNA-binding and protein phosphatase activity. DBP1 is involved in plant-potyvirus interactions. Loss-of-function of DBP1 renders resistance to potyviruses. Negatively regulates drought and salt tolerance through altering leaf surface permeability.	AtDBP1,DBP1	A3	AT2G25620_s1	AT2G25620_P1	WT_3h	WT_0h
AT2G25620	Encodes DBP1, a member of the DBP factors (DNA-binding protein phosphatases) featuring sequence-specific DNA-binding and protein phosphatase activity. DBP1 is involved in plant-potyvirus interactions. Loss-of-function of DBP1 renders resistance to potyviruses. Negatively regulates drought and salt tolerance through altering leaf surface permeability.	AtDBP1,DBP1	IR	AT2G25620_ID6	AT2G25620_P1	WT_3h	WT_0h
AT2G25620	Encodes DBP1, a member of the DBP factors (DNA-binding protein phosphatases) featuring sequence-specific DNA-binding and protein phosphatase activity. DBP1 is involved in plant-potyvirus interactions. Loss-of-function of DBP1 renders resistance to potyviruses. Negatively regulates drought and salt tolerance through altering leaf surface permeability.	AtDBP1,DBP1	IR	AT2G25620_s1	AT2G25620_P1	WT_3h	WT_0h
AT2G25620	Encodes DBP1, a member of the DBP factors (DNA-binding protein phosphatases) featuring sequence-specific DNA-binding and protein phosphatase activity. DBP1 is involved in plant-potyvirus interactions. Loss-of-function of DBP1 renders resistance to potyviruses. Negatively regulates drought and salt tolerance through altering leaf surface permeability.	AtDBP1,DBP1	IR	AT2G25620_P2	AT2G25620_P1	WT_3h	WT_0h
AT2G25870	Encodes an endoribonuclease that is required for chloroplast rRNA processing.	AtYbeY	A3	AT2G25870_ID5	AT2G25870_P1	WT_3h	WT_0h
AT2G26260	Encodes an enzyme with 3&	3BETAHSD/D2,AT3BETAHSD/D2	A3	AT2G26260_s1	AT2G26260_JS14	WT_3h	WT_0h
AT2G26260	Encodes an enzyme with 3&	3BETAHSD/D2,AT3BETAHSD/D2	A5	AT2G26260_s1	AT2G26260_JS14	WT_3h	WT_0h
AT2G26590	regulatory particle non-ATPase 13;(source:Araport11)	RPN13	A5	AT2G26590_P1	AT2G26590_P3	WT_3h	WT_0h
AT2G27060	Leucine-rich repeat protein kinase family protein;(source:Araport11)	NA	A3	AT2G27060_s1	AT2G27060_P1	WT_3h	WT_0h
AT2G27060	Leucine-rich repeat protein kinase family protein;(source:Araport11)	NA	IR	AT2G27060_s1	AT2G27060_P1	WT_3h	WT_0h
AT2G29525	Inositol phosphorylceramide synthase	AtIPCS3	A3	AT2G29525.3	AT2G29525_ID3	WT_3h	WT_0h
AT2G29525	Inositol phosphorylceramide synthase	AtIPCS3	A5	AT2G29525_P1	AT2G29525_ID3	WT_3h	WT_0h
AT2G29525	Inositol phosphorylceramide synthase	AtIPCS3	IR	AT2G29525.3	AT2G29525_ID3	WT_3h	WT_0h
AT2G29525	Inositol phosphorylceramide synthase	AtIPCS3	IR	AT2G29525_P1	AT2G29525_ID3	WT_3h	WT_0h
AT2G29540	RNA polymerase I(A) and III(C) 14 kDa subunit	ATRPAC14,ATRPC14,RPC14	IR	AT2G29540.2	AT2G29540_ID2	WT_3h	WT_0h
AT2G31955	COFACTOR OF NITRATE REDUCTASE AND XANTHINE DEHYDROGENASE 2. Encodes a protein involved in molybdenum cofactor biosynthesis. Homologous to E.coli moaA. Expression is abundant in all tissues examined, particularly in roots. Appears to have targeting signals for chloroplast or mitochondria.	CNX2	A3	AT2G31955_ID43	AT2G31955.2	WT_3h	WT_0h
AT2G31955	COFACTOR OF NITRATE REDUCTASE AND XANTHINE DEHYDROGENASE 2. Encodes a protein involved in molybdenum cofactor biosynthesis. Homologous to E.coli moaA. Expression is abundant in all tissues examined, particularly in roots. Appears to have targeting signals for chloroplast or mitochondria.	CNX2	A3	AT2G31955_ID48	AT2G31955.2	WT_3h	WT_0h
AT2G31955	COFACTOR OF NITRATE REDUCTASE AND XANTHINE DEHYDROGENASE 2. Encodes a protein involved in molybdenum cofactor biosynthesis. Homologous to E.coli moaA. Expression is abundant in all tissues examined, particularly in roots. Appears to have targeting signals for chloroplast or mitochondria.	CNX2	A5	AT2G31955_ID48	AT2G31955.2	WT_3h	WT_0h
AT2G31955	COFACTOR OF NITRATE REDUCTASE AND XANTHINE DEHYDROGENASE 2. Encodes a protein involved in molybdenum cofactor biosynthesis. Homologous to E.coli moaA. Expression is abundant in all tissues examined, particularly in roots. Appears to have targeting signals for chloroplast or mitochondria.	CNX2	IR	AT2G31955_ID48	AT2G31955.2	WT_3h	WT_0h
AT2G31955	COFACTOR OF NITRATE REDUCTASE AND XANTHINE DEHYDROGENASE 2. Encodes a protein involved in molybdenum cofactor biosynthesis. Homologous to E.coli moaA. Expression is abundant in all tissues examined, particularly in roots. Appears to have targeting signals for chloroplast or mitochondria.	CNX2	IR	AT2G31955_ID43	AT2G31955.2	WT_3h	WT_0h
AT2G31955	COFACTOR OF NITRATE REDUCTASE AND XANTHINE DEHYDROGENASE 2. Encodes a protein involved in molybdenum cofactor biosynthesis. Homologous to E.coli moaA. Expression is abundant in all tissues examined, particularly in roots. Appears to have targeting signals for chloroplast or mitochondria.	CNX2	A5	AT2G31955_ID43	AT2G31955_ID47	WT_3h	WT_0h
AT2G31955	COFACTOR OF NITRATE REDUCTASE AND XANTHINE DEHYDROGENASE 2. Encodes a protein involved in molybdenum cofactor biosynthesis. Homologous to E.coli moaA. Expression is abundant in all tissues examined, particularly in roots. Appears to have targeting signals for chloroplast or mitochondria.	CNX2	IR	AT2G31955_ID48	AT2G31955_ID47	WT_3h	WT_0h
AT2G31955	COFACTOR OF NITRATE REDUCTASE AND XANTHINE DEHYDROGENASE 2. Encodes a protein involved in molybdenum cofactor biosynthesis. Homologous to E.coli moaA. Expression is abundant in all tissues examined, particularly in roots. Appears to have targeting signals for chloroplast or mitochondria.	CNX2	IR	AT2G31955_ID43	AT2G31955_ID47	WT_3h	WT_0h
AT2G32180	plastid transcriptionally active 18;(source:Araport11)	PTAC18	A3	AT2G32180.1	AT2G32180_ID1	WT_3h	WT_0h
AT2G32320	Interacts genetically with its homolog ICA1; alters growth and flowering time plasticity in relation to temperature. Mutants display effects on growth, flowering and plant development, and ploidy level depending on ambient temperature (effects specific at >27C).	NA	A3	AT2G32320_ID71	AT2G32320.2	WT_3h	WT_0h
AT2G32320	Interacts genetically with its homolog ICA1; alters growth and flowering time plasticity in relation to temperature. Mutants display effects on growth, flowering and plant development, and ploidy level depending on ambient temperature (effects specific at >27C).	NA	A5	AT2G32320_ID71	AT2G32320.2	WT_3h	WT_0h
AT2G32320	Interacts genetically with its homolog ICA1; alters growth and flowering time plasticity in relation to temperature. Mutants display effects on growth, flowering and plant development, and ploidy level depending on ambient temperature (effects specific at >27C).	NA	IR	AT2G32320_ID71	AT2G32320.2	WT_3h	WT_0h
AT2G32320	Interacts genetically with its homolog ICA1; alters growth and flowering time plasticity in relation to temperature. Mutants display effects on growth, flowering and plant development, and ploidy level depending on ambient temperature (effects specific at >27C).	NA	A3	AT2G32320_ID68	AT2G32320_ID44	WT_3h	WT_0h
AT2G32320	Interacts genetically with its homolog ICA1; alters growth and flowering time plasticity in relation to temperature. Mutants display effects on growth, flowering and plant development, and ploidy level depending on ambient temperature (effects specific at >27C).	NA	A3	AT2G32320_ID71	AT2G32320_ID44	WT_3h	WT_0h
AT2G32320	Interacts genetically with its homolog ICA1; alters growth and flowering time plasticity in relation to temperature. Mutants display effects on growth, flowering and plant development, and ploidy level depending on ambient temperature (effects specific at >27C).	NA	IR	AT2G32320_P1	AT2G32320_ID44	WT_3h	WT_0h
AT2G32320	Interacts genetically with its homolog ICA1; alters growth and flowering time plasticity in relation to temperature. Mutants display effects on growth, flowering and plant development, and ploidy level depending on ambient temperature (effects specific at >27C).	NA	IR	AT2G32320_ID71	AT2G32320_ID67	WT_3h	WT_0h
AT2G32340	TraB family protein;(source:Araport11)	NA	A5	AT2G32340.1	AT2G32340_P1	WT_3h	WT_0h
AT2G32640	Encodes a lycopene beta cyclase that catalyzes the addition of beta-ionone end groups to the end of lycopene molecules.	LCYB	IR	AT2G32640_ID8	AT2G32640_P2	WT_3h	WT_0h
AT2G32700	Encodes a WD40 repeat and LUFS domain containing protein that is similar to LUG. Interacts physically with SEUSS and likely functions as part of a repressor complex that represses AG. Involved in cell wall modifications necessary for mucilage extrusion and mediates aluminium sensitivity through PECTIN METHYLESTERASE46-modulated root cell wall pectin methylesterification.	LUH,MUM1	A3	AT2G32700_c3	AT2G32700_P4	WT_3h	WT_0h
AT2G32700	Encodes a WD40 repeat and LUFS domain containing protein that is similar to LUG. Interacts physically with SEUSS and likely functions as part of a repressor complex that represses AG. Involved in cell wall modifications necessary for mucilage extrusion and mediates aluminium sensitivity through PECTIN METHYLESTERASE46-modulated root cell wall pectin methylesterification.	LUH,MUM1	A3	AT2G32700_ID18	AT2G32700_P4	WT_3h	WT_0h
AT2G32700	Encodes a WD40 repeat and LUFS domain containing protein that is similar to LUG. Interacts physically with SEUSS and likely functions as part of a repressor complex that represses AG. Involved in cell wall modifications necessary for mucilage extrusion and mediates aluminium sensitivity through PECTIN METHYLESTERASE46-modulated root cell wall pectin methylesterification.	LUH,MUM1	IR	AT2G32700_ID18	AT2G32700_P4	WT_3h	WT_0h
AT2G32700	Encodes a WD40 repeat and LUFS domain containing protein that is similar to LUG. Interacts physically with SEUSS and likely functions as part of a repressor complex that represses AG. Involved in cell wall modifications necessary for mucilage extrusion and mediates aluminium sensitivity through PECTIN METHYLESTERASE46-modulated root cell wall pectin methylesterification.	LUH,MUM1	A3	AT2G32700_c3	AT2G32700_P6	WT_3h	WT_0h
AT2G33150	Encodes an organellar (peroxisome, glyoxysome) 3-ketoacyl-CoA thiolase, involved in fatty acid b-oxidation during germination and subsequent seedling growth. Mutants have defects in glyoxysomal fatty acid beta-oxidation. EC2.3.1.16 thiolase.	KAT2,PED1,PKT3	IR	AT2G33150_JC2	AT2G33150_P1	WT_3h	WT_0h
AT2G34020	Calcium-binding EF-hand family protein;(source:Araport11)	NA	IR	AT2G34020_P2	AT2G34020_P1	WT_3h	WT_0h
AT2G35660	Encodes a member of a novel gene family with homology to known proteins involved in hydroxylation and oxidation of an aromatic ring.	CTF2A	A3	AT2G35660_P1	AT2G35660.3	WT_3h	WT_0h
AT2G35660	Encodes a member of a novel gene family with homology to known proteins involved in hydroxylation and oxidation of an aromatic ring.	CTF2A	IR	AT2G35660_P1	AT2G35660.3	WT_3h	WT_0h
AT2G35660	Encodes a member of a novel gene family with homology to known proteins involved in hydroxylation and oxidation of an aromatic ring.	CTF2A	A3	AT2G35660_P1	AT2G35660_ID1	WT_3h	WT_0h
AT2G36000	Encodes an mTERF protein localized in the chloroplast stroma.	EMB3114	A5	AT2G36000_P2	AT2G36000_P1	WT_3h	WT_0h
AT2G36792	Natural antisense transcript overlaps with AT2G36790;(source:Araport11)	NA	A3	AT2G36792_ID2	AT2G36792_ID1	WT_3h	WT_0h
AT2G36792	Natural antisense transcript overlaps with AT2G36790;(source:Araport11)	NA	A5	AT2G36792.1	AT2G36792_ID1	WT_3h	WT_0h
AT2G36792	Natural antisense transcript overlaps with AT2G36790;(source:Araport11)	NA	IR	AT2G36792_ID2	AT2G36792_ID1	WT_3h	WT_0h
AT2G36792	Natural antisense transcript overlaps with AT2G36790;(source:Araport11)	NA	IR	AT2G36792.1	AT2G36792_ID1	WT_3h	WT_0h
AT2G37025	TRF-like 8;(source:Araport11)	TRFL8	IR	AT2G37025_ID4	AT2G37025_c1	WT_3h	WT_0h
AT2G37025	TRF-like 8;(source:Araport11)	TRFL8	IR	AT2G37025_ID4	AT2G37025_ID6	WT_3h	WT_0h
AT2G37450	nodulin MtN21-like transporter family protein	UMAMIT13	ES	AT2G37450_P3	AT2G37450_P2	WT_3h	WT_0h
AT2G37450	nodulin MtN21-like transporter family protein	UMAMIT13	IR	AT2G37450_P3	AT2G37450_P2	WT_3h	WT_0h
AT2G37860	Encodes a protein involved in differential development of bundle sheath and mesophyll cell chloroplasts.	LCD1	IR	AT2G37860_P3	AT2G37860_P4	WT_3h	WT_0h
AT2G38710	AMMECR1 family;(source:Araport11)	NA	A5	AT2G38710_P2	AT2G38710_P1	WT_3h	WT_0h
AT2G38710	AMMECR1 family;(source:Araport11)	NA	IR	AT2G38710_P2	AT2G38710_P1	WT_3h	WT_0h
AT2G39470	PsbP-like protein 2;(source:Araport11)	PnsL1,PPL2	IR	AT2G39470_P1	AT2G39470_ID5	WT_3h	WT_0h
AT2G40340	Encodes a member of the DREB subfamily A-2 of ERF/AP2 transcription factor family. The protein contains one AP2 domain. There are eight members in this subfamily including DREB2A AND DREB2B that are involved in response to drought.	AtERF48,DREB2C	ES	AT2G40340_P2	AT2G40340_P3	WT_3h	WT_0h
AT2G40340	Encodes a member of the DREB subfamily A-2 of ERF/AP2 transcription factor family. The protein contains one AP2 domain. There are eight members in this subfamily including DREB2A AND DREB2B that are involved in response to drought.	AtERF48,DREB2C	IR	AT2G40340_P2	AT2G40340_P3	WT_3h	WT_0h
AT2G41020	WW domain-containing protein;(source:Araport11)	NA	A5	AT2G41020_P1	AT2G41020_ID21	WT_3h	WT_0h
AT2G41020	WW domain-containing protein;(source:Araport11)	NA	IR	AT2G41020_P1	AT2G41020_ID21	WT_3h	WT_0h
AT2G41070	Transcription factor homologous to ABI5. Regulates AtEm1 expression by binding directly at the AtEm1 promoter. Located in the nucleus and expressed during seed maturation in the cotyledons and later in the whole embryo.	ATBZIP12,DPBF4,EEL	A5	AT2G41070.1	AT2G41070.3	WT_3h	WT_0h
AT2G41070	Transcription factor homologous to ABI5. Regulates AtEm1 expression by binding directly at the AtEm1 promoter. Located in the nucleus and expressed during seed maturation in the cotyledons and later in the whole embryo.	ATBZIP12,DPBF4,EEL	IR	AT2G41070.1	AT2G41070.3	WT_3h	WT_0h
AT2G41670	Encodes SIN2 (SHORT INTEGUMENTS 2), a mitochondrial DAR GTPase. SIN2 is hypothesized to function in mitochondrial ribosome assembly. sin2 mutants produce ovules with short integuments due to early cessation of cell division in these structures.	SIN2	IR	AT2G41670_P1	AT2G41670_P2	WT_3h	WT_0h
AT2G41680	Encodes a NADPH thioredoxin reductase involved in chloroplast protection against oxidative damage.	NTRC	A3	AT2G41680_ID4	AT2G41680_P1	WT_3h	WT_0h
AT2G41710	Integrase-type DNA-binding superfamily protein;(source:Araport11)	NA	A3	AT2G41710.1	AT2G41710.2	WT_3h	WT_0h
AT2G42890	A member of mei2-like gene family, predominantly plant-based family of genes encoding RNA binding proteins with characteristic presence of a highly conserved RNA binding motif first described in the mei2 gene of the fission yeast S. pombe. In silico analyses reveal nine mei2 -like genes in A. thaliana. They were grouped into four distinct clades, based on overall sequence similarity and subfamily…	AML2,ML2	IR	AT2G42890.1	AT2G42890_P2	WT_3h	WT_0h
AT2G43370	RNA-binding (RRM/RBD/RNP motifs) family protein;(source:Araport11)	NA	A3	AT2G43370_ID16	AT2G43370_ID22	WT_3h	WT_0h
AT2G43370	RNA-binding (RRM/RBD/RNP motifs) family protein;(source:Araport11)	NA	IR	AT2G43370_JS2	AT2G43370_ID22	WT_3h	WT_0h
AT2G43400	Encodes a unique electron-transfer flavoprotein:ubiquinone oxidoreductase that is localized to the mitochondrion. Mutants are more sensitive to sugar starvation when plants are kept in the dark for long periods.	ETFQO	IR	AT2G43400_ID36	AT2G43400_P1	WT_3h	WT_0h
AT2G43400	Encodes a unique electron-transfer flavoprotein:ubiquinone oxidoreductase that is localized to the mitochondrion. Mutants are more sensitive to sugar starvation when plants are kept in the dark for long periods.	ETFQO	IR	AT2G43400_ID31	AT2G43400_P1	WT_3h	WT_0h
AT2G43500	Plant regulator RWP-RK family protein;(source:Araport11)	NLP8	A3	AT2G43500_c3	AT2G43500_P1	WT_3h	WT_0h
AT2G43500	Plant regulator RWP-RK family protein;(source:Araport11)	NLP8	A3	AT2G43500_P3	AT2G43500_P1	WT_3h	WT_0h
AT2G43500	Plant regulator RWP-RK family protein;(source:Araport11)	NLP8	A5	AT2G43500_c1	AT2G43500_P1	WT_3h	WT_0h
AT2G43500	Plant regulator RWP-RK family protein;(source:Araport11)	NLP8	A5	AT2G43500_P11	AT2G43500_P1	WT_3h	WT_0h
AT2G43500	Plant regulator RWP-RK family protein;(source:Araport11)	NLP8	ES	AT2G43500_c3	AT2G43500_P1	WT_3h	WT_0h
AT2G43500	Plant regulator RWP-RK family protein;(source:Araport11)	NLP8	IR	AT2G43500_c3	AT2G43500_P1	WT_3h	WT_0h
AT2G43500	Plant regulator RWP-RK family protein;(source:Araport11)	NLP8	IR	AT2G43500_P11	AT2G43500_P1	WT_3h	WT_0h
AT2G43500	Plant regulator RWP-RK family protein;(source:Araport11)	NLP8	IR	AT2G43500_P3	AT2G43500_P1	WT_3h	WT_0h
AT2G43760	molybdopterin biosynthesis MoaE family protein;(source:Araport11)	CNX6	A5	AT2G43760.3	AT2G43760_ID2	WT_3h	WT_0h
AT2G43900	Encodes a 5-inositol-phosphate phosphatase, that, in vitro, shows activity against IP(1,4,5).	5PTase12	IR	AT2G43900_P1	AT2G43900_P2	WT_3h	WT_0h
AT2G45280	Encodes a protein similar to RAD51C involved in double stranded break repair via homologous recombination. Sensitive to DSB induced by Mitomycin C and gamma irradiation, interacts with Atxrcc3 in yeast two-hybrid assay. Required for female meiosis but not critical for mitosis under normal conditions.	ATRAD51C,RAD51C	A5	AT2G45280_P1	AT2G45280_c1	WT_3h	WT_0h
AT2G46340	Encodes a member of the SPA (suppressor of phyA-105) protein family (SPA1-SPA4). SPA proteins contain an N-terminal serine/threonine kinase-like motif followed by a coiled-coil structure and a C-terminal WD-repeat domain. SPA1 is a PHYA signaling intermediate, putative regulator of PHYA signaling pathway. Light responsive repressor of photomorphogenesis. Involved in regulating circadian rhythms a…	SPA1	A5	AT2G46340_P1	AT2G46340_ID12	WT_3h	WT_0h
AT2G46340	Encodes a member of the SPA (suppressor of phyA-105) protein family (SPA1-SPA4). SPA proteins contain an N-terminal serine/threonine kinase-like motif followed by a coiled-coil structure and a C-terminal WD-repeat domain. SPA1 is a PHYA signaling intermediate, putative regulator of PHYA signaling pathway. Light responsive repressor of photomorphogenesis. Involved in regulating circadian rhythms a…	SPA1	IR	AT2G46340_P1	AT2G46340_ID12	WT_3h	WT_0h
AT2G46450	Member of Cyclic nucleotide gated channel family.Positive regulator of resistance against avirulent fungal pathogen.Suppresses the phenotype conferred by cpr22 in a dosage-dependent manner.	ATCNGC12,CNGC12	A5	AT2G46450_JC26	AT2G46450_ID40	WT_3h	WT_0h
AT2G46450	Member of Cyclic nucleotide gated channel family.Positive regulator of resistance against avirulent fungal pathogen.Suppresses the phenotype conferred by cpr22 in a dosage-dependent manner.	ATCNGC12,CNGC12	IR	AT2G46450_ID20	AT2G46450_ID40	WT_3h	WT_0h
AT2G46450	Member of Cyclic nucleotide gated channel family.Positive regulator of resistance against avirulent fungal pathogen.Suppresses the phenotype conferred by cpr22 in a dosage-dependent manner.	ATCNGC12,CNGC12	IR	AT2G46450_JC26	AT2G46450_ID40	WT_3h	WT_0h
AT2G46810	MYC-type transcription factor which interacts with ICE1 and negatively regulates cold-responsive genes and cold tolerance.	MYC70	A5	AT2G46810.1	AT2G46810_ID2	WT_3h	WT_0h
AT2G46810	MYC-type transcription factor which interacts with ICE1 and negatively regulates cold-responsive genes and cold tolerance.	MYC70	A5	AT2G46810_c2	AT2G46810_ID2	WT_3h	WT_0h
AT2G46810	MYC-type transcription factor which interacts with ICE1 and negatively regulates cold-responsive genes and cold tolerance.	MYC70	ES	AT2G46810.1	AT2G46810_ID2	WT_3h	WT_0h
AT2G46810	MYC-type transcription factor which interacts with ICE1 and negatively regulates cold-responsive genes and cold tolerance.	MYC70	IR	AT2G46810.1	AT2G46810_ID2	WT_3h	WT_0h
AT2G46810	MYC-type transcription factor which interacts with ICE1 and negatively regulates cold-responsive genes and cold tolerance.	MYC70	IR	AT2G46810_c2	AT2G46810_ID2	WT_3h	WT_0h
AT2G46810	MYC-type transcription factor which interacts with ICE1 and negatively regulates cold-responsive genes and cold tolerance.	MYC70	A5	AT2G46810_c2	AT2G46810_P3	WT_3h	WT_0h
AT2G46810	MYC-type transcription factor which interacts with ICE1 and negatively regulates cold-responsive genes and cold tolerance.	MYC70	A5	AT2G46810.1	AT2G46810_P3	WT_3h	WT_0h
AT2G46810	MYC-type transcription factor which interacts with ICE1 and negatively regulates cold-responsive genes and cold tolerance.	MYC70	ES	AT2G46810.1	AT2G46810_P3	WT_3h	WT_0h
AT2G46810	MYC-type transcription factor which interacts with ICE1 and negatively regulates cold-responsive genes and cold tolerance.	MYC70	IR	AT2G46810.1	AT2G46810_P3	WT_3h	WT_0h
AT2G46810	MYC-type transcription factor which interacts with ICE1 and negatively regulates cold-responsive genes and cold tolerance.	MYC70	IR	AT2G46810_c2	AT2G46810_P3	WT_3h	WT_0h
AT3G01210	ACD11 binding partner, may be involved in negative regulation of ROS-mediated defense response.	NA	A5	AT3G01210_P1	AT3G01210_c1	WT_3h	WT_0h
AT3G01210	ACD11 binding partner, may be involved in negative regulation of ROS-mediated defense response.	NA	IR	AT3G01210_P1	AT3G01210_c1	WT_3h	WT_0h
AT3G01770	Bromodomain protein that functions as a negative regulator of sugar and ABA signaling.	ATBET10,BET10,GTE11	IR	AT3G01770_P1	AT3G01770_P2	WT_3h	WT_0h
AT3G02300	Regulator of chromosome condensation (RCC1) family protein;(source:Araport11)	NA	A5	AT3G02300_ID3	AT3G02300_P1	WT_3h	WT_0h
AT3G02740	Eukaryotic aspartyl protease family protein;(source:Araport11)	NA	A5	AT3G02740_ID17	AT3G02740_P1	WT_3h	WT_0h
AT3G02890	PHD protein which cooperates with PAIPP2 and BAH domain protein AIPP3 to read H3K4 histone marks. The BAH-PHD bivalent histone reader complex silences a substantial subset of H3K27me3-enriched loci, including development and stress response-related genes. Interacts with BDT1, acts with other PHD proteins to associate with flowering genes and thereby suppress their transcription.	AIPP2	A3	AT3G02890_P4	AT3G02890_c1	WT_3h	WT_0h
AT3G02890	PHD protein which cooperates with PAIPP2 and BAH domain protein AIPP3 to read H3K4 histone marks. The BAH-PHD bivalent histone reader complex silences a substantial subset of H3K27me3-enriched loci, including development and stress response-related genes. Interacts with BDT1, acts with other PHD proteins to associate with flowering genes and thereby suppress their transcription.	AIPP2	IR	AT3G02890_P4	AT3G02890_c1	WT_3h	WT_0h
AT3G02890	PHD protein which cooperates with PAIPP2 and BAH domain protein AIPP3 to read H3K4 histone marks. The BAH-PHD bivalent histone reader complex silences a substantial subset of H3K27me3-enriched loci, including development and stress response-related genes. Interacts with BDT1, acts with other PHD proteins to associate with flowering genes and thereby suppress their transcription.	AIPP2	IR	AT3G02890_P4	AT3G02890_P3	WT_3h	WT_0h
AT3G02890	PHD protein which cooperates with PAIPP2 and BAH domain protein AIPP3 to read H3K4 histone marks. The BAH-PHD bivalent histone reader complex silences a substantial subset of H3K27me3-enriched loci, including development and stress response-related genes. Interacts with BDT1, acts with other PHD proteins to associate with flowering genes and thereby suppress their transcription.	AIPP2	IR	AT3G02890_P1	AT3G02890_P3	WT_3h	WT_0h
AT3G04500	RNA-binding (RRM/RBD/RNP motifs) family protein;(source:Araport11)	NA	A3	AT3G04500_P3	AT3G04500_P1	WT_3h	WT_0h
AT3G05700	Encodes a DNA binding protein with transcription activation activity. It is expressed in response to osmotic, drought and ABA stress.	Dil9-3	A3	AT3G05700_P2	AT3G05700_P1	WT_3h	WT_0h
AT3G05700	Encodes a DNA binding protein with transcription activation activity. It is expressed in response to osmotic, drought and ABA stress.	Dil9-3	A5	AT3G05700_JS1	AT3G05700_P1	WT_3h	WT_0h
AT3G05700	Encodes a DNA binding protein with transcription activation activity. It is expressed in response to osmotic, drought and ABA stress.	Dil9-3	IR	AT3G05700_JS1	AT3G05700_P1	WT_3h	WT_0h
AT3G05700	Encodes a DNA binding protein with transcription activation activity. It is expressed in response to osmotic, drought and ABA stress.	Dil9-3	IR	AT3G05700_P2	AT3G05700_P1	WT_3h	WT_0h
AT3G06500	Encodes an alkaline/neutral invertase which localizes in mitochondria. It may be modulating hormone balance in relation to the radicle emergence. Mutants display severely reduced shoot growth and reduced oxygen consumption. Mutant root development is not affected as reported for A/N-InvA mutant (inva) plants. The mRNA is cell-to-cell mobile.	A/N-InvC	ES	AT3G06500_ID6	AT3G06500_ID4	WT_3h	WT_0h
AT3G06500	Encodes an alkaline/neutral invertase which localizes in mitochondria. It may be modulating hormone balance in relation to the radicle emergence. Mutants display severely reduced shoot growth and reduced oxygen consumption. Mutant root development is not affected as reported for A/N-InvA mutant (inva) plants. The mRNA is cell-to-cell mobile.	A/N-InvC	IR	AT3G06500_ID6	AT3G06500_ID4	WT_3h	WT_0h
AT3G06880	Transducin/WD40 repeat-like superfamily protein;(source:Araport11)	NA	A3	AT3G06880_P2	AT3G06880_JS5	WT_3h	WT_0h
AT3G06880	Transducin/WD40 repeat-like superfamily protein;(source:Araport11)	NA	IR	AT3G06880_P2	AT3G06880_P3	WT_3h	WT_0h
AT3G07890	Ypt/Rab-GAP domain of gyp1p superfamily protein;(source:Araport11)	NA	A3	AT3G07890_P4	AT3G07890_P3	WT_3h	WT_0h
AT3G07890	Ypt/Rab-GAP domain of gyp1p superfamily protein;(source:Araport11)	NA	A3	AT3G07890_P5	AT3G07890_P3	WT_3h	WT_0h
AT3G07890	Ypt/Rab-GAP domain of gyp1p superfamily protein;(source:Araport11)	NA	IR	AT3G07890_P4	AT3G07890_P3	WT_3h	WT_0h
AT3G07890	Ypt/Rab-GAP domain of gyp1p superfamily protein;(source:Araport11)	NA	IR	AT3G07890_P5	AT3G07890_P3	WT_3h	WT_0h
AT3G08710	Associated to plasma membrane. Moves cell to cell, suggesting a role in intercellular communication. The redox reaction between oxidized AtGPX3 and reduced AtTRXh9 is realized through the forming and breaking of disulfide bonds via the active sites of Cys4 and Cys57 in AtTRXh9.	ATH9,TH9,TRX_H9	A5	AT3G08710_P2	AT3G08710_P1	WT_3h	WT_0h
AT3G08720	Encodes a ribosomal-protein S6 kinase. Gene expression is induced by cold and salt (NaCl). Activation of AtS6k is regulated by 1-naphthylacetic acid and kinetin, at least in part, via a lipid kinase-dependent pathway. Phosphorylates specifically mammalian and plant S6 at 25 degrees C but not at 37 degrees C. Involved in translational up-regulation of ribosomal proteins.	ATPK19,ATPK2,ATS6K2,S6K2	A3	AT3G08720_s2	AT3G08720_c2	WT_3h	WT_0h
AT3G08720	Encodes a ribosomal-protein S6 kinase. Gene expression is induced by cold and salt (NaCl). Activation of AtS6k is regulated by 1-naphthylacetic acid and kinetin, at least in part, via a lipid kinase-dependent pathway. Phosphorylates specifically mammalian and plant S6 at 25 degrees C but not at 37 degrees C. Involved in translational up-regulation of ribosomal proteins.	ATPK19,ATPK2,ATS6K2,S6K2	A3	AT3G08720_s2	AT3G08720_P2	WT_3h	WT_0h
AT3G08720	Encodes a ribosomal-protein S6 kinase. Gene expression is induced by cold and salt (NaCl). Activation of AtS6k is regulated by 1-naphthylacetic acid and kinetin, at least in part, via a lipid kinase-dependent pathway. Phosphorylates specifically mammalian and plant S6 at 25 degrees C but not at 37 degrees C. Involved in translational up-regulation of ribosomal proteins.	ATPK19,ATPK2,ATS6K2,S6K2	IR	AT3G08720_s2	AT3G08720_P2	WT_3h	WT_0h
AT3G09160	RNA-binding (RRM/RBD/RNP motifs) family protein;(source:Araport11)	NA	IR	AT3G09160_ID6	AT3G09160.1	WT_3h	WT_0h
AT3G09160	RNA-binding (RRM/RBD/RNP motifs) family protein;(source:Araport11)	NA	IR	AT3G09160_ID6	AT3G09160_ID7	WT_3h	WT_0h
AT3G10010	Encodes a protein with DNA glycosylase activity that is involved in maintaining methylation marks.	DML2	A5	AT3G10010_JC1	AT3G10010_P2	WT_3h	WT_0h
AT3G10572	APEM9 is required for both PTS1- and PTS2-dependent protein transport. APEM9 interacts with PEX6 in BiFC assay and mating-based Split ubiquitin system. BiFC data shows that APEM9 is required for peroxisomal localization of PEX1-PEX6 complex. These results indicate that APEM9 functions like mammalian PEX26 and yeast PEX15.	APEM9,DAYU,PEX26	IR	AT3G10572_P1	AT3G10572_P2	WT_3h	WT_0h
AT3G11620	alpha/beta-Hydrolases superfamily protein;(source:Araport11)	NA	A3	AT3G11620_ID22	AT3G11620.2	WT_3h	WT_0h
AT3G11620	alpha/beta-Hydrolases superfamily protein;(source:Araport11)	NA	IR	AT3G11620_ID22	AT3G11620.2	WT_3h	WT_0h
AT3G11620	alpha/beta-Hydrolases superfamily protein;(source:Araport11)	NA	A3	AT3G11620_ID22	AT3G11620_c1	WT_3h	WT_0h
AT3G11620	alpha/beta-Hydrolases superfamily protein;(source:Araport11)	NA	A5	AT3G11620_ID22	AT3G11620_c1	WT_3h	WT_0h
AT3G11620	alpha/beta-Hydrolases superfamily protein;(source:Araport11)	NA	IR	AT3G11620_ID22	AT3G11620_c1	WT_3h	WT_0h
AT3G11620	alpha/beta-Hydrolases superfamily protein;(source:Araport11)	NA	A5	AT3G11620_ID22	AT3G11620_ID30	WT_3h	WT_0h
AT3G11820	Encodes a syntaxin localized at the plasma membrane. SYR1/PEN1 is a member of the SNARE superfamily and functions in positioning anchoring of the KAT1 K+ channel protein at the plasma membrane. Transcription is upregulated by abscisic acid, suggesting a role in ABA signaling. Also functions in non-host resistance against barley powdery mildew. It is a nonessential component of the preinvasive res…	AT-SYR1,ATSYP121,ATSYR1,PEN1,SYP121,SYR1	IR	AT3G11820_P2	AT3G11820_ID2	WT_3h	WT_0h
AT3G11820	Encodes a syntaxin localized at the plasma membrane. SYR1/PEN1 is a member of the SNARE superfamily and functions in positioning anchoring of the KAT1 K+ channel protein at the plasma membrane. Transcription is upregulated by abscisic acid, suggesting a role in ABA signaling. Also functions in non-host resistance against barley powdery mildew. It is a nonessential component of the preinvasive res…	AT-SYR1,ATSYP121,ATSYR1,PEN1,SYP121,SYR1	IR	AT3G11820_c2	AT3G11820_ID2	WT_3h	WT_0h
AT3G13420	transmembrane protein;(source:Araport11)	NA	IR	AT3G13420_P2	AT3G13420_P1	WT_3h	WT_0h
AT3G13420	transmembrane protein;(source:Araport11)	NA	IR	AT3G13420_P2	AT3G13420_P3	WT_3h	WT_0h
AT3G14770	Nodulin MtN3 family protein;(source:Araport11)	AtSWEET2,SWEET2	IR	AT3G14770.1	AT3G14770_JS1	WT_3h	WT_0h
AT3G14910	Rab3 GTPase-activating protein non-catalytic subunit;(source:Araport11)	NA	A3	AT3G14910_ID3	AT3G14910_P1	WT_3h	WT_0h
AT3G14930	Uroporphyrinogen decarboxylase;(source:Araport11)	HEME1	IR	AT3G14930_P1	AT3G14930_P2	WT_3h	WT_0h
AT3G16030	lectin protein kinase family protein;(source:Araport11)	CES101,RFO3	A5	AT3G16030_P2	AT3G16030_c2	WT_3h	WT_0h
AT3G16030	lectin protein kinase family protein;(source:Araport11)	CES101,RFO3	IR	AT3G16030_P2	AT3G16030_c2	WT_3h	WT_0h
AT3G16030	lectin protein kinase family protein;(source:Araport11)	CES101,RFO3	A3	AT3G16030_P2	AT3G16030_JS6	WT_3h	WT_0h
AT3G16030	lectin protein kinase family protein;(source:Araport11)	CES101,RFO3	A5	AT3G16030_P2	AT3G16030_JS6	WT_3h	WT_0h
AT3G16030	lectin protein kinase family protein;(source:Araport11)	CES101,RFO3	IR	AT3G16030_P2	AT3G16030_JS6	WT_3h	WT_0h
AT3G16030	lectin protein kinase family protein;(source:Araport11)	CES101,RFO3	IR	AT3G16030_P2	AT3G16030_P3	WT_3h	WT_0h
AT3G16030	lectin protein kinase family protein;(source:Araport11)	CES101,RFO3	IR	AT3G16030_P2	AT3G16030_P4	WT_3h	WT_0h
AT3G16520	UDP-glucosyl transferase 88A1;(source:Araport11)	UGT88A1	A3	AT3G16520.1	AT3G16520_P2	WT_3h	WT_0h
AT3G17030	Nucleic acid-binding proteins superfamily;(source:Araport11)	NA	A3	AT3G17030_c1	AT3G17030_c2	WT_3h	WT_0h
AT3G17100	sequence-specific DNA binding transcription factor;(source:Araport11)	AIF3	IR	AT3G17100_P2	AT3G17100_P1	WT_3h	WT_0h
AT3G17430	Nucleotide/sugar transporter family protein The mRNA is cell-to-cell mobile.	NA	A5	AT3G17430_P2	AT3G17430_P1	WT_3h	WT_0h
AT3G17430	Nucleotide/sugar transporter family protein The mRNA is cell-to-cell mobile.	NA	IR	AT3G17430_P2	AT3G17430_P1	WT_3h	WT_0h
AT3G18530	ARM repeat superfamily protein;(source:Araport11)	NA	A3	AT3G18530_ID1	AT3G18530_ID7	WT_3h	WT_0h
AT3G19800	Encodes the DUF177B version of the two DUF177 proteins in Arabidopsis. This version differs from DUF177A in containing a 23 aa insertion compared to the DUF177A sequence.	DUF177B	A3	AT3G19800_P1	AT3G19800_c1	WT_3h	WT_0h
AT3G20010	Encodes a member of the SNF2 family of helicase-like proteins and is involved in RNA-directed DNA methylation. It is functionally redundant with FRG2 and interacts physically with SUVR2, another component of the RdDM pathway.	CHR27,FRG1	IR	AT3G20010_P1	AT3G20010_P3	WT_3h	WT_0h
AT3G20810	JMJD5 encodes a protein which contains a jumonji-C (jmjC) domain. jmjd5 mutant plants have a short-period circadian phenotype. JMJD5 has histone demethylase activity and interacts with EFM to repress FT.	JMJ30,JMJD5	A3	AT3G20810_ID9	AT3G20810_P5	WT_3h	WT_0h
AT3G20810	JMJD5 encodes a protein which contains a jumonji-C (jmjC) domain. jmjd5 mutant plants have a short-period circadian phenotype. JMJD5 has histone demethylase activity and interacts with EFM to repress FT.	JMJ30,JMJD5	A5	AT3G20810_ID9	AT3G20810_P5	WT_3h	WT_0h
AT3G20810	JMJD5 encodes a protein which contains a jumonji-C (jmjC) domain. jmjd5 mutant plants have a short-period circadian phenotype. JMJD5 has histone demethylase activity and interacts with EFM to repress FT.	JMJ30,JMJD5	A5	AT3G20810_s4	AT3G20810_P5	WT_3h	WT_0h
AT3G20810	JMJD5 encodes a protein which contains a jumonji-C (jmjC) domain. jmjd5 mutant plants have a short-period circadian phenotype. JMJD5 has histone demethylase activity and interacts with EFM to repress FT.	JMJ30,JMJD5	IR	AT3G20810_s4	AT3G20810_P5	WT_3h	WT_0h
AT3G20810	JMJD5 encodes a protein which contains a jumonji-C (jmjC) domain. jmjd5 mutant plants have a short-period circadian phenotype. JMJD5 has histone demethylase activity and interacts with EFM to repress FT.	JMJ30,JMJD5	IR	AT3G20810_ID9	AT3G20810_P5	WT_3h	WT_0h
AT3G23090	Member of the microtubule regulatory protein WVD2/WDL family WDL3 stabilizes cortical microtubules and is involved in light induced hypocotyl elongation. WDL3 is ubiquinated by COP1, leading to its degadation in the dark,	WDL3	A5	AT3G23090_P4	AT3G23090_P3	WT_3h	WT_0h
AT3G23255	tRNA dimethylallyltransferase;(source:Araport11)	NA	IR	AT3G23255.1	AT3G23255_ID8	WT_3h	WT_0h
AT3G24530	AAA-type ATPase family protein / ankyrin repeat family protein;(source:Araport11)	NA	A3	AT3G24530_JS1	AT3G24530_P1	WT_3h	WT_0h
AT3G24530	AAA-type ATPase family protein / ankyrin repeat family protein;(source:Araport11)	NA	IR	AT3G24530_JS1	AT3G24530_P1	WT_3h	WT_0h
AT3G25190	The gene encodes nodulin-like21 whose transcript abundance was repressed under conditions of Fe-deficient growth.	AtVTL5,VTL5	A3	AT3G25190_P1	AT3G25190_ID2	WT_3h	WT_0h
AT3G25740	Encodes a plastid localized methionine aminopeptidase. Formerly called MAP1C, now called MAP1B.	MAP1B,MAP1C	A5	AT3G25740_P2	AT3G25740_ID29	WT_3h	WT_0h
AT3G25740	Encodes a plastid localized methionine aminopeptidase. Formerly called MAP1C, now called MAP1B.	MAP1B,MAP1C	IR	AT3G25740_P2	AT3G25740_ID29	WT_3h	WT_0h
AT3G25740	Encodes a plastid localized methionine aminopeptidase. Formerly called MAP1C, now called MAP1B.	MAP1B,MAP1C	A3	AT3G25740_P2	AT3G25740_ID31	WT_3h	WT_0h
AT3G25740	Encodes a plastid localized methionine aminopeptidase. Formerly called MAP1C, now called MAP1B.	MAP1B,MAP1C	A5	AT3G25740_P2	AT3G25740_ID31	WT_3h	WT_0h
AT3G25740	Encodes a plastid localized methionine aminopeptidase. Formerly called MAP1C, now called MAP1B.	MAP1B,MAP1C	IR	AT3G25740_P2	AT3G25740_ID31	WT_3h	WT_0h
AT3G25740	Encodes a plastid localized methionine aminopeptidase. Formerly called MAP1C, now called MAP1B.	MAP1B,MAP1C	A5	AT3G25740_P2	AT3G25740_P1	WT_3h	WT_0h
AT3G25740	Encodes a plastid localized methionine aminopeptidase. Formerly called MAP1C, now called MAP1B.	MAP1B,MAP1C	IR	AT3G25740_P2	AT3G25740_P1	WT_3h	WT_0h
AT3G25840	Spliceosome-associated kinase involved in alternative splicing. May influence alternative splicing patterns by phosphorylating a subset of splicing regulators.	PRP4KA	ES	AT3G25840.1	AT3G25840_P2	WT_3h	WT_0h
AT3G25840	Spliceosome-associated kinase involved in alternative splicing. May influence alternative splicing patterns by phosphorylating a subset of splicing regulators.	PRP4KA	IR	AT3G25840.1	AT3G25840_P2	WT_3h	WT_0h
AT3G26020	Encodes protein phosphatase 2A (PP2A) B'eta subunit. Targeted to nucleus and cytosol.	PP2AB'ETA	A3	AT3G26020_P6	AT3G26020_P1	WT_3h	WT_0h
AT3G28670	oxidoreductase, zinc-binding dehydrogenase family protein;(source:Araport11)	NA	A3	AT3G28670_P1	AT3G28670_P2	WT_3h	WT_0h
AT3G28956	RNA polymerase II, Rpb4, core protein;(source:Araport11)	NA	A5	AT3G28956_ID6	AT3G28956_P8	WT_3h	WT_0h
AT3G29240	PPR containing protein (DUF179);(source:Araport11)	NA	IR	AT3G29240.1	AT3G29240_P2	WT_3h	WT_0h
AT3G32940	RNA-binding KH domain-containing protein;(source:Araport11)	NA	IR	AT3G32940.1	AT3G32940_ID2	WT_3h	WT_0h
AT3G45780	Blue-light photoreceptor. Contains a light activated serine-threonine kinase domain and LOV1 and LOV2 repeats. Mutants are defective in blue-light response. Mediates blue light-induced growth enhancements. PHOT1 and PHOT2 mediate blue light-dependent activation of the plasma membrane H+-ATPase in guard cell protoplasts. PHOT1 undergoes blue-light-dependent autophosphorylation. At least eight phos…	JK224,NPH1,PHOT1,RPT1	IR	AT3G45780_P1	AT3G45780_P2	WT_3h	WT_0h
AT3G47550	RING/FYVE/PHD zinc finger superfamily protein;(source:Araport11)	NA	IR	AT3G47550.6	AT3G47550_P3	WT_3h	WT_0h
AT3G49430	Barta et al (2010) have proposed a nomenclature for Serine/Arginine-Rich Protein Splicing Factors (SR proteins): Plant Cell. 2010, 22:2926.	At-SR34a,SR34a,SRp34a	ES	AT3G49430_P6	AT3G49430_P1	WT_3h	WT_0h
AT3G49430	Barta et al (2010) have proposed a nomenclature for Serine/Arginine-Rich Protein Splicing Factors (SR proteins): Plant Cell. 2010, 22:2926.	At-SR34a,SR34a,SRp34a	IR	AT3G49430_P6	AT3G49430_P1	WT_3h	WT_0h
AT3G49920	Encodes a voltage-dependent anion channel (VDAC: AT3G01280/VDAC1, AT5G67500/VDAC2, AT5G15090/VDAC3, AT5G57490/VDAC4, AT5G15090/VDAC5). VDACs are reported to be porin-type, beta-barrel diffusion pores. They are prominently localized in the outer mitochondrial membrane and are involved in metabolite exchange between the organelle and the cytosol.	ATVDAC5,VDAC5	IR	AT3G49920_P3	AT3G49920_JS1	WT_3h	WT_0h
AT3G50790	esterase/lipase/thioesterase family protein;(source:Araport11)	NA	A3	AT3G50790_ID5	AT3G50790.1	WT_3h	WT_0h
AT3G50790	esterase/lipase/thioesterase family protein;(source:Araport11)	NA	A3	AT3G50790_c2	AT3G50790.1	WT_3h	WT_0h
AT3G52180	Encodes a plant-specific glucan phosphatase that contains a noncatalytic carbohydrate-binding module as well as a dual specificity protein phosphatase domain. SEX4 can dephosphorylate C6- and C3-glucosyl residues on native starch grains and related maltodextrin compounds in vitro. This protein interacts with the plant SnRK AKIN11, binds starch, and is localized in the chloroplast. sex4 mutants ha…	ATPTPKIS1,ATSEX4,DSP4,SEX4	A3	AT3G52180_P4	AT3G52180_ID2	WT_3h	WT_0h
AT3G52180	Encodes a plant-specific glucan phosphatase that contains a noncatalytic carbohydrate-binding module as well as a dual specificity protein phosphatase domain. SEX4 can dephosphorylate C6- and C3-glucosyl residues on native starch grains and related maltodextrin compounds in vitro. This protein interacts with the plant SnRK AKIN11, binds starch, and is localized in the chloroplast. sex4 mutants ha…	ATPTPKIS1,ATSEX4,DSP4,SEX4	IR	AT3G52180_P4	AT3G52180_ID2	WT_3h	WT_0h
AT3G52180	Encodes a plant-specific glucan phosphatase that contains a noncatalytic carbohydrate-binding module as well as a dual specificity protein phosphatase domain. SEX4 can dephosphorylate C6- and C3-glucosyl residues on native starch grains and related maltodextrin compounds in vitro. This protein interacts with the plant SnRK AKIN11, binds starch, and is localized in the chloroplast. sex4 mutants ha…	ATPTPKIS1,ATSEX4,DSP4,SEX4	A5	AT3G52180_P4	AT3G52180_JS5	WT_3h	WT_0h
AT3G52180	Encodes a plant-specific glucan phosphatase that contains a noncatalytic carbohydrate-binding module as well as a dual specificity protein phosphatase domain. SEX4 can dephosphorylate C6- and C3-glucosyl residues on native starch grains and related maltodextrin compounds in vitro. This protein interacts with the plant SnRK AKIN11, binds starch, and is localized in the chloroplast. sex4 mutants ha…	ATPTPKIS1,ATSEX4,DSP4,SEX4	IR	AT3G52180_P4	AT3G52180_JS5	WT_3h	WT_0h
AT3G52180	Encodes a plant-specific glucan phosphatase that contains a noncatalytic carbohydrate-binding module as well as a dual specificity protein phosphatase domain. SEX4 can dephosphorylate C6- and C3-glucosyl residues on native starch grains and related maltodextrin compounds in vitro. This protein interacts with the plant SnRK AKIN11, binds starch, and is localized in the chloroplast. sex4 mutants ha…	ATPTPKIS1,ATSEX4,DSP4,SEX4	IR	AT3G52180_P4	AT3G52180_P1	WT_3h	WT_0h
AT3G54390	sequence-specific DNA binding transcription factor;(source:Araport11)	NA	IR	AT3G54390_ID4	AT3G54390_ID1	WT_3h	WT_0h
AT3G54390	sequence-specific DNA binding transcription factor;(source:Araport11)	NA	IR	AT3G54390_P2	AT3G54390_ID1	WT_3h	WT_0h
AT3G54750	downstream neighbor of Son;(source:Araport11)	NA	A3	AT3G54750_P5	AT3G54750_P2	WT_3h	WT_0h
AT3G54810	Encodes a protein containing a GATA type zinc finger domain that is expressed in the embryo axis and involved in germination. Mutants have a reduced rate of germination even when stratified.	BME3,BME3-ZF,GATA8	IR	AT3G54810_ID8	AT3G54810_P2	WT_3h	WT_0h
AT3G54880	zinc finger protein;(source:Araport11)	NA	A3	AT3G54880_ID4	AT3G54880.1	WT_3h	WT_0h
AT3G54880	zinc finger protein;(source:Araport11)	NA	A3	AT3G54880_ID4	AT3G54880_JC8	WT_3h	WT_0h
AT3G54880	zinc finger protein;(source:Araport11)	NA	ES	AT3G54880_ID4	AT3G54880_JC8	WT_3h	WT_0h
AT3G54910	RNI-like superfamily protein;(source:Araport11)	NA	A3	AT3G54910_ID10	AT3G54910_ID9	WT_3h	WT_0h
AT3G54910	RNI-like superfamily protein;(source:Araport11)	NA	IR	AT3G54910_ID12	AT3G54910_ID9	WT_3h	WT_0h
AT3G55290	NAD(P)-binding Rossmann-fold superfamily protein;(source:Araport11)	SDRd	A3	AT3G55290_P2	AT3G55290_P1	WT_3h	WT_0h
AT3G55330	Facilitates the assembly of the photosystem II supercomplexes and optimizes plant pitness under fluctuating light.	PPL1	A3	AT3G55330_s1	AT3G55330_P1	WT_3h	WT_0h
AT3G56050	Protein kinase family protein;(source:Araport11)	NA	IR	AT3G56050_P2	AT3G56050_P1	WT_3h	WT_0h
AT3G56080	S-adenosyl-L-methionine-dependent methyltransferases superfamily protein;(source:Araport11)	NA	A5	AT3G56080_JS1	AT3G56080_P1	WT_3h	WT_0h
AT3G56080	S-adenosyl-L-methionine-dependent methyltransferases superfamily protein;(source:Araport11)	NA	A5	AT3G56080_s1	AT3G56080_P1	WT_3h	WT_0h
AT3G56080	S-adenosyl-L-methionine-dependent methyltransferases superfamily protein;(source:Araport11)	NA	ES	AT3G56080_JS1	AT3G56080_P1	WT_3h	WT_0h
AT3G56080	S-adenosyl-L-methionine-dependent methyltransferases superfamily protein;(source:Araport11)	NA	IR	AT3G56080_JS1	AT3G56080_P1	WT_3h	WT_0h
AT3G57470	Insulinase (Peptidase family M16) family protein;(source:Araport11)	NA	IR	AT3G57470_P4	AT3G57470_P6	WT_3h	WT_0h
AT3G58430	MATH domain/coiled-coil protein;(source:Araport11)	NA	IR	AT3G58430_ID2	AT3G58430_JS2	WT_3h	WT_0h
AT3G58930	F-box/RNI-like superfamily protein;(source:Araport11)	NA	IR	AT3G58930_P5	AT3G58930_P3	WT_3h	WT_0h
AT3G59060	Encodes a novel Myc-related bHLH transcription factor, which physically associated with APRR1/TOC1 and is a member of PIF3 transcription factor family. Involved in shade avoidance. Functions as negative regulator of PhyB. Protein levels are modulated by phytochrome B. Controls the resistance to B. cinerea in a COI1- and EIN2-dependent manner.	A-PUT2,bHLHb1,PIF5	A3	AT3G59060_P2	AT3G59060_ID3	WT_3h	WT_0h
AT3G59060	Encodes a novel Myc-related bHLH transcription factor, which physically associated with APRR1/TOC1 and is a member of PIF3 transcription factor family. Involved in shade avoidance. Functions as negative regulator of PhyB. Protein levels are modulated by phytochrome B. Controls the resistance to B. cinerea in a COI1- and EIN2-dependent manner.	A-PUT2,bHLHb1,PIF5	IR	AT3G59060_P2	AT3G59060_ID3	WT_3h	WT_0h
AT3G59110	Protein kinase superfamily protein;(source:Araport11)	NA	A3	AT3G59110_ID2	AT3G59110_P1	WT_3h	WT_0h
AT3G60140	Encodes a protein similar to beta-glucosidase and is a member of glycoside hydrolase family 1. Expression is induced after 24 hours of dark treatment, in senescing leaves and treatment with exogenous photosynthesis inhibitor. Induction of gene expression was suppressed in excised leaves supplied with sugar. The authors suggest that the gene's expression pattern is responding to the level of sugar…	BGLU30,DIN2,SRG2	A3	AT3G60140_P2	AT3G60140_JC3	WT_3h	WT_0h
AT3G60140	Encodes a protein similar to beta-glucosidase and is a member of glycoside hydrolase family 1. Expression is induced after 24 hours of dark treatment, in senescing leaves and treatment with exogenous photosynthesis inhibitor. Induction of gene expression was suppressed in excised leaves supplied with sugar. The authors suggest that the gene's expression pattern is responding to the level of sugar…	BGLU30,DIN2,SRG2	IR	AT3G60140_P2	AT3G60140_JC3	WT_3h	WT_0h
AT3G60140	Encodes a protein similar to beta-glucosidase and is a member of glycoside hydrolase family 1. Expression is induced after 24 hours of dark treatment, in senescing leaves and treatment with exogenous photosynthesis inhibitor. Induction of gene expression was suppressed in excised leaves supplied with sugar. The authors suggest that the gene's expression pattern is responding to the level of sugar…	BGLU30,DIN2,SRG2	IR	AT3G60140_P2	AT3G60140_P1	WT_3h	WT_0h
AT3G60810	DUF1499 family protein;(source:Araport11)	NA	IR	AT3G60810_ID12	AT3G60810_ID11	WT_3h	WT_0h
AT3G60830	Encodes an actin-related protein required for normal embryogenesis, plant architecture and floral organ abscission.	ARP7,ARP7,ATARP7	IR	AT3G60830_s1	AT3G60830_P1	WT_3h	WT_0h
AT3G60965	transposable_element_gene;(source:Araport11);copia-like retrotransposon family, has a 8.8e-146 P-value blast match to dbj|BAA78425.1| polyprotein (Arabidopsis thaliana) (AtRE1) (Ty1_Copia-element);(source:TAIR10)	NA	A3	AT3G60965.1	AT3G60965_JC3	WT_3h	WT_0h
AT3G60965	transposable_element_gene;(source:Araport11);copia-like retrotransposon family, has a 8.8e-146 P-value blast match to dbj|BAA78425.1| polyprotein (Arabidopsis thaliana) (AtRE1) (Ty1_Copia-element);(source:TAIR10)	NA	IR	AT3G60965.1	AT3G60965_JC3	WT_3h	WT_0h
AT3G61080	Protein kinase superfamily protein;(source:Araport11)	NA	A3	AT3G61080.1	AT3G61080_ID5	WT_3h	WT_0h
AT3G61080	Protein kinase superfamily protein;(source:Araport11)	NA	IR	AT3G61080.1	AT3G61080_ID5	WT_3h	WT_0h
AT3G61860	encodes an arginine/serine-rich splicing factor. transcript is alternatively spliced and is differentially expressed in different tissues (flowers, roots, stems, and leaves) examined. Barta et al (2010) have proposed a nomenclature for Serine/Arginine-Rich Protein Splicing Factors (SR proteins): Plant Cell. 2010, 22:2926.	At-RS31,ATRSP31,RS31,RSP31	ES	AT3G61860_ID2	AT3G61860_P1	WT_3h	WT_0h
AT3G61860	encodes an arginine/serine-rich splicing factor. transcript is alternatively spliced and is differentially expressed in different tissues (flowers, roots, stems, and leaves) examined. Barta et al (2010) have proposed a nomenclature for Serine/Arginine-Rich Protein Splicing Factors (SR proteins): Plant Cell. 2010, 22:2926.	At-RS31,ATRSP31,RS31,RSP31	IR	AT3G61860_ID2	AT3G61860_P1	WT_3h	WT_0h
AT3G62090	encodes a novel Myc-related bHLH transcription factor, which physically associated with APRR1/TOC1 and is a member of PIF3 transcription factor family.	PIF6	IR	AT3G62090_ID2	AT3G62090.1	WT_3h	WT_0h
AT3G62910	Encodes a plastid-localized ribosome release factor 1 that is essential in chloroplast development. Pale green, albino mutant seedlings arrest early in seedling development.	APG3,AtcpRF1,cpRF1	A3	AT3G62910_s1	AT3G62910_ID12	WT_3h	WT_0h
AT3G62910	Encodes a plastid-localized ribosome release factor 1 that is essential in chloroplast development. Pale green, albino mutant seedlings arrest early in seedling development.	APG3,AtcpRF1,cpRF1	A5	AT3G62910_s1	AT3G62910_P1	WT_3h	WT_0h
AT3G63140	Encodes a protein with ribonuclease activity that is involved in plastid rRNA maturation.	CSP41A	IR	AT3G63140_P1	AT3G63140_ID4	WT_3h	WT_0h
AT3G63530	Encodes a novel E3 ubiquitin ligase that acts as a central negative regulator of Arabidopsis floral organ size. Organ size is limited by restricting the period of proliferative growth, rather than the rate of growth and appears to act in a novel pathway, independent of ANT and JAG. Both mRNA and protein are expressed in all actively growing regions of the plant and the vasculature and the protein…	BB,BB2,EOD1	A3	AT3G63530_c1	AT3G63530_ID1	WT_3h	WT_0h
AT4G00310	Putative membrane lipoprotein;(source:Araport11)	EDA8,MEE46	IR	AT4G00310_P2	AT4G00310_P1	WT_3h	WT_0h
AT4G00755	F-box family protein;(source:Araport11)	NA	IR	AT4G00755_P2	AT4G00755_ID1	WT_3h	WT_0h
AT4G00840	DHHC-type zinc finger family protein;(source:Araport11)	NA	A3	AT4G00840_c2	AT4G00840.1	WT_3h	WT_0h
AT4G00980	zinc knuckle (CCHC-type) family protein;(source:Araport11)	NA	IR	AT4G00980_ID4	AT4G00980.1	WT_3h	WT_0h
AT4G04692	pseudogene of expressed protein;(source:Araport11)	NA	IR	AT4G04692.2	AT4G04692.1	WT_3h	WT_0h
AT4G04850	Encodes a potassium efflux antiporter; has three splice forms KEA3.1, KEA3.2, and KEA3.3, KEA3.2 is the most abundant splice form in all plant organs (silique, flower, leaf and root). KEA3.1 and KEA3.3 are minor variants that can be found in flowers and in leaves. KEA3 is localized to the thylakoid membrane and enriched in the stromal lamellae. It allows proton efflux from the thylakoid lumen by …	ATKEA3,KEA3	IR	AT4G04850.1	AT4G04850.2	WT_3h	WT_0h
AT4G04870	Encodes a protein with cardiolipin synthase activity that is localized to the mitochondiria.	CLS	IR	AT4G04870_s1	AT4G04870_P1	WT_3h	WT_0h
AT4G05590	Encodes NRGA1, a putative mitochondrial pyruvate carrier that mediates ABA regulation of guard cell ion channels and drought stress responses.	MPC2L,NRGA1	A3	AT4G05590_ID4	AT4G05590_ID5	WT_3h	WT_0h
AT4G05590	Encodes NRGA1, a putative mitochondrial pyruvate carrier that mediates ABA regulation of guard cell ion channels and drought stress responses.	MPC2L,NRGA1	IR	AT4G05590_ID4	AT4G05590_ID5	WT_3h	WT_0h
AT4G09720	RAB GTPase homolog G3A;(source:Araport11)	ATRABG3A,RABG3A	IR	AT4G09720_P2	AT4G09720_JC3	WT_3h	WT_0h
AT4G10770	oligopeptide transporter	ATOPT7,OPT7	A3	AT4G10770_s1	AT4G10770_P1	WT_3h	WT_0h
AT4G10770	oligopeptide transporter	ATOPT7,OPT7	IR	AT4G10770_s1	AT4G10770_P1	WT_3h	WT_0h
AT4G11050	glycosyl hydrolase 9C3;(source:Araport11)	AtGH9C3,GH9C3	A3	AT4G11050_P1	AT4G11050_P3	WT_3h	WT_0h
AT4G11610	C2 calcium/lipid-binding plant phosphoribosyltransferase family protein;(source:Araport11)	MCTP7	IR	AT4G11610_P3	AT4G11610_P1	WT_3h	WT_0h
AT4G12710	ARM repeat superfamily protein;(source:Araport11)	NA	IR	AT4G12710_P1	AT4G12710_ID1	WT_3h	WT_0h
AT4G12780	Negative regulation of growth and endocytosis, most likely as a result of inhibition of the recruitment of clathrin to endocytic pits. Overexpression inhbits recruitment of clathrin resulting in negative regulation of endocytosis and developmental arrest.	AUXILIN-LIKE1	IR	AT4G12780_P6	AT4G12780.2	WT_3h	WT_0h
AT4G12780	Negative regulation of growth and endocytosis, most likely as a result of inhibition of the recruitment of clathrin to endocytic pits. Overexpression inhbits recruitment of clathrin resulting in negative regulation of endocytosis and developmental arrest.	AUXILIN-LIKE1	IR	AT4G12780_P6	AT4G12780_P4	WT_3h	WT_0h
AT4G14096	F-box/RNI-like superfamily protein;(source:Araport11)	NA	ES	AT4G14096_JC2	AT4G14096_P1	WT_3h	WT_0h
AT4G14096	F-box/RNI-like superfamily protein;(source:Araport11)	NA	ES	AT4G14096_JC2	AT4G14096_P2	WT_3h	WT_0h
AT4G14096	F-box/RNI-like superfamily protein;(source:Araport11)	NA	IR	AT4G14096_JC2	AT4G14096_P2	WT_3h	WT_0h
AT4G14147	actin-related protein 2/3 complex 34kDa subunit family / arp2/3 complex 34kDa subunit family	ARPC4	A3	AT4G14147_ID1	AT4G14147_c3	WT_3h	WT_0h
AT4G14147	actin-related protein 2/3 complex 34kDa subunit family / arp2/3 complex 34kDa subunit family	ARPC4	IR	AT4G14147_ID1	AT4G14147_c3	WT_3h	WT_0h
AT4G14385	histone acetyltransferase subunit NuA4-domain protein;(source:Araport11)	NA	A5	AT4G14385_P1	AT4G14385_P6	WT_3h	WT_0h
AT4G14385	histone acetyltransferase subunit NuA4-domain protein;(source:Araport11)	NA	IR	AT4G14385_P1	AT4G14385_P6	WT_3h	WT_0h
AT4G14770	Regulates fate transition and cell Divisions in the stomatal lineage.	ATTCX2,SOL2,TCX2	IR	AT4G14770.1	AT4G14770_ID2	WT_3h	WT_0h
AT4G15233	ABC-2 and Plant PDR ABC-type transporter family protein;(source:Araport11)	ABCG42	ES	AT4G15233_c1	AT4G15233_P8	WT_3h	WT_0h
AT4G16845	The VERNALIZATION2 (VRN2) gene mediates vernalization and encodes a nuclear-localized zinc finger protein with similarity to Polycomb group (PcG) proteins of plants and animals. In wild-type Arabidopsis, vernalization results in the stable reduction of the levels of the floral repressor FLC. In vrn2 mutants, FLC expression is downregulated normally in response to vernalization, but instead of rem…	VRN2	A3	AT4G16845.2	AT4G16845_P1	WT_3h	WT_0h
AT4G16845	The VERNALIZATION2 (VRN2) gene mediates vernalization and encodes a nuclear-localized zinc finger protein with similarity to Polycomb group (PcG) proteins of plants and animals. In wild-type Arabidopsis, vernalization results in the stable reduction of the levels of the floral repressor FLC. In vrn2 mutants, FLC expression is downregulated normally in response to vernalization, but instead of rem…	VRN2	A5	AT4G16845.2	AT4G16845_P1	WT_3h	WT_0h
AT4G16845	The VERNALIZATION2 (VRN2) gene mediates vernalization and encodes a nuclear-localized zinc finger protein with similarity to Polycomb group (PcG) proteins of plants and animals. In wild-type Arabidopsis, vernalization results in the stable reduction of the levels of the floral repressor FLC. In vrn2 mutants, FLC expression is downregulated normally in response to vernalization, but instead of rem…	VRN2	IR	AT4G16845.2	AT4G16845_P1	WT_3h	WT_0h
AT4G17695	Homeodomain-like superfamily protein;(source:Araport11)	KAN3	A3	AT4G17695_s3	AT4G17695_P1	WT_3h	WT_0h
AT4G18370	Encodes DEG5. Forms a hexamer with DEG8 in the thylakoid lumen. Involved in the cleavage of photodamaged D2 protein of photosystem II (PSII).	DEG5,DEGP5,HHOA	A5	AT4G18370_c1	AT4G18370_P1	WT_3h	WT_0h
AT4G18593	dual specificity protein phosphatase-like protein;(source:Araport11)	NA	IR	AT4G18593_s2	AT4G18593_P1	WT_3h	WT_0h
AT4G21430	protein B160;(source:Araport11)	B160	A3	AT4G21430_P1	AT4G21430_c1	WT_3h	WT_0h
AT4G21430	protein B160;(source:Araport11)	B160	IR	AT4G21430_P1	AT4G21430_JS7	WT_3h	WT_0h
AT4G21910	MATE efflux family protein;(source:Araport11)	NA	ES	AT4G21910_P2	AT4G21910_ID6	WT_3h	WT_0h
AT4G21910	MATE efflux family protein;(source:Araport11)	NA	IR	AT4G21910.1	AT4G21910_ID6	WT_3h	WT_0h
AT4G21910	MATE efflux family protein;(source:Araport11)	NA	ES	AT4G21910.1	AT4G21910_P4	WT_3h	WT_0h
AT4G21910	MATE efflux family protein;(source:Araport11)	NA	IR	AT4G21910.1	AT4G21910_P4	WT_3h	WT_0h
AT4G22970	Encodes a separase (ESP), homologous to human and mouse separase protein. Separase is a capase family protease required for the release of sister chromatid cohesion during meiosis and mitosis. Arabidopsis separase contains a predicted 2Fe2S-ferredoxin domain that is not present in the proteins of other organisms. Also contains a putative EF-hand calcium binding domain. Mutant seeds exhibited embr…	AESP,ESP,ESP,RSW4	A3	AT4G22970_P2	AT4G22970_P1	WT_3h	WT_0h
AT4G24270	A locus involved in embryogenesis. Mutations in this locus result in embryo lethality.	EMB140	A3	AT4G24270_P3	AT4G24270_JS3	WT_3h	WT_0h
AT4G24270	A locus involved in embryogenesis. Mutations in this locus result in embryo lethality.	EMB140	A3	AT4G24270_P3	AT4G24270_P1	WT_3h	WT_0h
AT4G24270	A locus involved in embryogenesis. Mutations in this locus result in embryo lethality.	EMB140	IR	AT4G24270_P3	AT4G24270_P1	WT_3h	WT_0h
AT4G24670	Encodes a protein with similarity to the TAA1 trytophan aminotransferase involved in IAA biosynthesis. Double mutant analyses suggest that this protein is involved in regulating many aspects of plant growth and development from embryogenesis to flower formation and plays a role in ethylene-mediated signaling.TAR2 is required for reprogramming root architecture in response to low nitrogen conditio…	AtTAR2,TAR2	IR	AT4G24670_P2	AT4G24670_P1	WT_3h	WT_0h
AT4G25080	Encodes a protein with methyltransferase activity responsible for the methylation of magnesium protoporphyrin IX. Mutants defective in this gene are affected in chlorophyll biosynthesis and show a reduction in the accumulation of a number of major thylakoid-associated proteins including components of PSI (LHCI), PSII (LHCII, D1, CP43) and the cytochrome b6f complex (Cytf). By contrast, no signifi…	CHLM	A3	AT4G25080_JS2	AT4G25080_P2	WT_3h	WT_0h
AT4G25080	Encodes a protein with methyltransferase activity responsible for the methylation of magnesium protoporphyrin IX. Mutants defective in this gene are affected in chlorophyll biosynthesis and show a reduction in the accumulation of a number of major thylakoid-associated proteins including components of PSI (LHCI), PSII (LHCII, D1, CP43) and the cytochrome b6f complex (Cytf). By contrast, no signifi…	CHLM	A5	AT4G25080_JS2	AT4G25080_P2	WT_3h	WT_0h
AT4G25080	Encodes a protein with methyltransferase activity responsible for the methylation of magnesium protoporphyrin IX. Mutants defective in this gene are affected in chlorophyll biosynthesis and show a reduction in the accumulation of a number of major thylakoid-associated proteins including components of PSI (LHCI), PSII (LHCII, D1, CP43) and the cytochrome b6f complex (Cytf). By contrast, no signifi…	CHLM	IR	AT4G25080_JS2	AT4G25080_P2	WT_3h	WT_0h
AT4G25080	Encodes a protein with methyltransferase activity responsible for the methylation of magnesium protoporphyrin IX. Mutants defective in this gene are affected in chlorophyll biosynthesis and show a reduction in the accumulation of a number of major thylakoid-associated proteins including components of PSI (LHCI), PSII (LHCII, D1, CP43) and the cytochrome b6f complex (Cytf). By contrast, no signifi…	CHLM	IR	AT4G25080.3	AT4G25080_P2	WT_3h	WT_0h
AT4G25910	Encodes a protein containing the NFU domain that may be involved in iron-sulfur cluster assembly. Part of a five member gene family, more closely related to NFU1 and 2 than to NFU4 and 5. Targeted to the chloroplast. The mRNA is cell-to-cell mobile.	ATCNFU3,NFU3	A3	AT4G25910_s1	AT4G25910_ID4	WT_3h	WT_0h
AT4G25910	Encodes a protein containing the NFU domain that may be involved in iron-sulfur cluster assembly. Part of a five member gene family, more closely related to NFU1 and 2 than to NFU4 and 5. Targeted to the chloroplast. The mRNA is cell-to-cell mobile.	ATCNFU3,NFU3	IR	AT4G25910_s1	AT4G25910_ID4	WT_3h	WT_0h
AT4G26190	Haloacid dehalogenase-like hydrolase (HAD) superfamily protein;(source:Araport11)	NA	IR	AT4G26190_P1	AT4G26190_c6	WT_3h	WT_0h
AT4G26190	Haloacid dehalogenase-like hydrolase (HAD) superfamily protein;(source:Araport11)	NA	MES	AT4G26190_JC5	AT4G26190_c6	WT_3h	WT_0h
AT4G26190	Haloacid dehalogenase-like hydrolase (HAD) superfamily protein;(source:Araport11)	NA	IR	AT4G26190_P1	AT4G26190_P3	WT_3h	WT_0h
AT4G26400	RING/U-box superfamily protein;(source:Araport11)	NA	A5	AT4G26400_P2	AT4G26400_ID3	WT_3h	WT_0h
AT4G26400	RING/U-box superfamily protein;(source:Araport11)	NA	IR	AT4G26400_P2	AT4G26400_ID3	WT_3h	WT_0h
AT4G26780	unknown function	AR192,MGE2	IR	AT4G26780_P1	AT4G26780_ID1	WT_3h	WT_0h
AT4G27040	EAP30/Vps36 family protein;(source:Araport11)	VPS22	A3	AT4G27040_P5	AT4G27040_ID118	WT_3h	WT_0h
AT4G27040	EAP30/Vps36 family protein;(source:Araport11)	VPS22	IR	AT4G27040_P5	AT4G27040_ID118	WT_3h	WT_0h
AT4G27100	Ypt/Rab-GAP domain of gyp1p superfamily protein;(source:Araport11)	NA	IR	AT4G27100_P2	AT4G27100.1	WT_3h	WT_0h
AT4G27100	Ypt/Rab-GAP domain of gyp1p superfamily protein;(source:Araport11)	NA	IR	AT4G27100_P2	AT4G27100_ID12	WT_3h	WT_0h
AT4G28020	tRNA-thr(GGU) m(6)t(6)A37 methyltransferase;(source:Araport11)	NA	IR	AT4G28020_P1	AT4G28020_P3	WT_3h	WT_0h
AT4G28020	tRNA-thr(GGU) m(6)t(6)A37 methyltransferase;(source:Araport11)	NA	IR	AT4G28020_P1	AT4G28020_P4	WT_3h	WT_0h
AT4G28550	Ypt/Rab-GAP domain of gyp1p superfamily protein;(source:Araport11)	NA	A3	AT4G28550_P1	AT4G28550_ID4	WT_3h	WT_0h
AT4G30000	Dihydropterin pyrophosphokinase / Dihydropteroate synthase;(source:Araport11)	NA	IR	AT4G30000.1	AT4G30000_ID1	WT_3h	WT_0h
AT4G30310	FGGY family of carbohydrate kinase;(source:Araport11)	NA	IR	AT4G30310_P2	AT4G30310_P4	WT_3h	WT_0h
AT4G30580	Encodes a plastidic lysophosphatidic acid acyltransferase (LPAAT). Is critical for chloroplasts phosphatidic acid biosynthesis. The null allele is embryo lethal.	ATS2,EMB1995,LPAT1	A3	AT4G30580_c1	AT4G30580_P1	WT_3h	WT_0h
AT4G30630	hypothetical protein;(source:Araport11)	NA	IR	AT4G30630_P1	AT4G30630_P2	WT_3h	WT_0h
AT4G30993	Calcineurin-like metallo-phosphoesterase superfamily protein;(source:Araport11)	NA	A3	AT4G30993_P1	AT4G30993_c1	WT_3h	WT_0h
AT4G30993	Calcineurin-like metallo-phosphoesterase superfamily protein;(source:Araport11)	NA	IR	AT4G30993_P1	AT4G30993_c1	WT_3h	WT_0h
AT4G30993	Calcineurin-like metallo-phosphoesterase superfamily protein;(source:Araport11)	NA	IR	AT4G30993_P1	AT4G30993_P2	WT_3h	WT_0h
AT4G31240	protein kinase C-like zinc finger protein;(source:Araport11)	AtNRX2,NRX2	IR	AT4G31240_P2	AT4G31240_P1	WT_3h	WT_0h
AT4G32060	Encodes an EF-hand protein with homology to constituents of the mitochondrial Ca2+ uniporter machinery in mammals. MICU binds Ca2+ and localizes to the mitochondria in Arabidopsis. It is a negative regulator of mitochondrial calcium uptake. Mutants display elevated matrix calcium at steady state and modified calcium transient kinetics in vivo.	MICU	A5	AT4G32060_ID12	AT4G32060_P1	WT_3h	WT_0h
AT4G32060	Encodes an EF-hand protein with homology to constituents of the mitochondrial Ca2+ uniporter machinery in mammals. MICU binds Ca2+ and localizes to the mitochondria in Arabidopsis. It is a negative regulator of mitochondrial calcium uptake. Mutants display elevated matrix calcium at steady state and modified calcium transient kinetics in vivo.	MICU	IR	AT4G32060_ID12	AT4G32060_P1	WT_3h	WT_0h
AT4G32850	Encodes a nuclear poly(A) polymerase. Located in the nucleus. The mRNA is cell-to-cell mobile.	nPAP,PAP(IV),PAPS4	A3	AT4G32850_P5	AT4G32850_P10	WT_3h	WT_0h
AT4G32850	Encodes a nuclear poly(A) polymerase. Located in the nucleus. The mRNA is cell-to-cell mobile.	nPAP,PAP(IV),PAPS4	IR	AT4G32850_P5	AT4G32850_P10	WT_3h	WT_0h
AT4G33530	potassium transporter	KUP5	IR	AT4G33530_ID6	AT4G33530.1	WT_3h	WT_0h
AT4G34430	Member of a small family of SWI3-like genes in Arabidopsis. Referred to as CHB4 in Zhou et al. (2002).	ATSWI3D,CHB3	A3	AT4G34430.3	AT4G34430_P2	WT_3h	WT_0h
AT4G34900	xanthine dehydrogenase 2;(source:Araport11)	ATXDH2,XDH2	A3	AT4G34900_P1	AT4G34900_JS2	WT_3h	WT_0h
AT4G34900	xanthine dehydrogenase 2;(source:Araport11)	ATXDH2,XDH2	ES	AT4G34900_P1	AT4G34900_JS2	WT_3h	WT_0h
AT4G34900	xanthine dehydrogenase 2;(source:Araport11)	ATXDH2,XDH2	IR	AT4G34900_P1	AT4G34900_JS2	WT_3h	WT_0h
AT4G35250	HCF244 is a member of the atypical short-chain dehydrogenase/reductase superfamily, a modified group, which has lost enzyme activity.HCF244 interacts with unknown partners in a 200-400 kD membrane associated complex.	HCF244	A3	AT4G35250_JS1	AT4G35250_P1	WT_3h	WT_0h
AT4G36648	other_RNA;(source:Araport11)	NA	IR	AT4G36648_c1	AT4G36648_ID2	WT_3h	WT_0h
AT4G36690	Regulates flowering time and displays a redundant role in pollen tube growth together with AtU2AF65b.	ATU2AF65A	IR	AT4G36690_P3	AT4G36690_P2	WT_3h	WT_0h
AT4G37040	encodes a methionine aminopeptidase	MAP1D	IR	AT4G37040_ID6	AT4G37040_P1	WT_3h	WT_0h
AT4G37300	maternal effect embryo arrest 59;(source:Araport11)	MEE59	IR	AT4G37300.1	AT4G37300_c1	WT_3h	WT_0h
AT4G37432	Natural antisense transcript overlaps with AT4G37430;(source:Araport11)	NA	IR	AT4G37432.1	AT4G37432_ID1	WT_3h	WT_0h
AT4G37550	Indole-3-acetamide (IAM) hydrolase gene required for the auxin effects of IAM.	NA	IR	AT4G37550_P1	AT4G37550_P2	WT_3h	WT_0h
AT4G38240	Encodes N-acetyl glucosaminyl transferase I, the first enzyme in the pathway of complex glycan biosynthesis.	CGL,CGL1,GNTI	IR	AT4G38240.1	AT4G38240_ID219	WT_3h	WT_0h
AT4G38240	Encodes N-acetyl glucosaminyl transferase I, the first enzyme in the pathway of complex glycan biosynthesis.	CGL,CGL1,GNTI	IR	AT4G38240.2	AT4G38240_ID219	WT_3h	WT_0h
AT4G38240	Encodes N-acetyl glucosaminyl transferase I, the first enzyme in the pathway of complex glycan biosynthesis.	CGL,CGL1,GNTI	IR	AT4G38240.2	AT4G38240_ID99	WT_3h	WT_0h
AT4G39850	Encodes a peroxisomal protein of the ATP binding cassette (ABC) transporter class (PMP subfamily) with significant identity to the human X-linked adrenoleukodystrophy protein (ALDP). The gene product promotes germination and represses embryo dormancy. ABI3, ABA1, FUS3 and LEC1 are epistatic to this gene. Mutants accumulate fatty acyl CoA suggesting a defect in uptake of fatty acyl CoA into the pe…	ABCD1,ACN2,AtABCD1,CTS,PED3,PXA1	IR	AT4G39850_P4	AT4G39850_P1	WT_3h	WT_0h
AT5G02790	GST functions in reductive deglutathionylation of glutathione conjugates of quercetin.	GSTL3	IR	AT5G02790.1	AT5G02790_ID8	WT_3h	WT_0h
AT5G03560	Tetratricopeptide repeat (TPR)-like superfamily protein;(source:Araport11)	NA	ES	AT5G03560_P1	AT5G03560_P2	WT_3h	WT_0h
AT5G03560	Tetratricopeptide repeat (TPR)-like superfamily protein;(source:Araport11)	NA	IR	AT5G03560_P1	AT5G03560_P2	WT_3h	WT_0h
AT5G04360	Encodes an enzyme thought to be involved in the hydrolysis of the &	ATLDA,ATPU1,LDA,PU1	A3	AT5G04360_JS18	AT5G04360_ID4	WT_3h	WT_0h
AT5G04360	Encodes an enzyme thought to be involved in the hydrolysis of the &	ATLDA,ATPU1,LDA,PU1	A5	AT5G04360_JS18	AT5G04360_ID4	WT_3h	WT_0h
AT5G04360	Encodes an enzyme thought to be involved in the hydrolysis of the &	ATLDA,ATPU1,LDA,PU1	IR	AT5G04360_JS18	AT5G04360_ID4	WT_3h	WT_0h
AT5G04360	Encodes an enzyme thought to be involved in the hydrolysis of the &	ATLDA,ATPU1,LDA,PU1	A3	AT5G04360_JS18	AT5G04360_JS17	WT_3h	WT_0h
AT5G04360	Encodes an enzyme thought to be involved in the hydrolysis of the &	ATLDA,ATPU1,LDA,PU1	A5	AT5G04360_JS18	AT5G04360_JS17	WT_3h	WT_0h
AT5G04360	Encodes an enzyme thought to be involved in the hydrolysis of the &	ATLDA,ATPU1,LDA,PU1	IR	AT5G04360_JS18	AT5G04360_JS17	WT_3h	WT_0h
AT5G04360	Encodes an enzyme thought to be involved in the hydrolysis of the &	ATLDA,ATPU1,LDA,PU1	A3	AT5G04360_JS18	AT5G04360_P2	WT_3h	WT_0h
AT5G04360	Encodes an enzyme thought to be involved in the hydrolysis of the &	ATLDA,ATPU1,LDA,PU1	A5	AT5G04360_JS18	AT5G04360_P2	WT_3h	WT_0h
AT5G04360	Encodes an enzyme thought to be involved in the hydrolysis of the &	ATLDA,ATPU1,LDA,PU1	IR	AT5G04360_JS18	AT5G04360_P2	WT_3h	WT_0h
AT5G05310	TLC ATP/ADP transporter;(source:Araport11)	NA	IR	AT5G05310_c1	AT5G05310_ID97	WT_3h	WT_0h
AT5G05310	TLC ATP/ADP transporter;(source:Araport11)	NA	IR	AT5G05310_c1	AT5G05310_ID99	WT_3h	WT_0h
AT5G05310	TLC ATP/ADP transporter;(source:Araport11)	NA	A3	AT5G05310_c1	AT5G05310_P7	WT_3h	WT_0h
AT5G05310	TLC ATP/ADP transporter;(source:Araport11)	NA	A3	AT5G05310_c1	AT5G05310_s3	WT_3h	WT_0h
AT5G05310	TLC ATP/ADP transporter;(source:Araport11)	NA	ES	AT5G05310_c1	AT5G05310_s3	WT_3h	WT_0h
AT5G05310	TLC ATP/ADP transporter;(source:Araport11)	NA	IR	AT5G05310_c1	AT5G05310_s3	WT_3h	WT_0h
AT5G06690	Encodes a thioredoxin (WCRKC1) localized in chloroplast stroma. Contains a WCRKC motif. Functions in redox cascade with 2CPA and 2CPB via the ferredoxin-thioredoxin reductase (FTR)/thioredoxin (Trx) pathway to mediate the light-responsive reductive control of target proteins. Oxidizes redox-regulated proteins.	TrxL2.1,WCRKC1	IR	AT5G06690_P1	AT5G06690_c1	WT_3h	WT_0h
AT5G06690	Encodes a thioredoxin (WCRKC1) localized in chloroplast stroma. Contains a WCRKC motif. Functions in redox cascade with 2CPA and 2CPB via the ferredoxin-thioredoxin reductase (FTR)/thioredoxin (Trx) pathway to mediate the light-responsive reductive control of target proteins. Oxidizes redox-regulated proteins.	TrxL2.1,WCRKC1	IR	AT5G06690_P1	AT5G06690_P4	WT_3h	WT_0h
AT5G06710	Homeobox-leucine zipper protein.	HAT14	IR	AT5G06710_P4	AT5G06710_P1	WT_3h	WT_0h
AT5G06950	Transcription factor of the B-ZIP family that has high affinity for C-box motifs. Interacts with NPR1 and may regulate PR gene expression. Phosphorylated by a CK2-like protein in vitro. Phosphorylation is enhanced by salicylic acid treatment.	AHBP-1B,AtTGA2,TGA2	A3	AT5G06950_ID102	AT5G06950_P1	WT_3h	WT_0h
AT5G07320	Encodes an APC isoform in Arabidopsis, a calcium-dependent mitochondrial ATP-Mg/Pi transporter.	APC3	A3	AT5G07320_JS1	AT5G07320_P1	WT_3h	WT_0h
AT5G07790	hypothetical protein;(source:Araport11)	NA	A5	AT5G07790_P1	AT5G07790_P3	WT_3h	WT_0h
AT5G08040	mitochondrial import receptor subunit TOM5-like protein;(source:Araport11)	TOM5	IR	AT5G08040_s1	AT5G08040_P1	WT_3h	WT_0h
AT5G08500	Transmembrane CLPTM1 family protein;(source:Araport11)	NA	IR	AT5G08500_P1	AT5G08500_P2	WT_3h	WT_0h
AT5G08710	Regulator of chromosome condensation (RCC1) family protein;(source:Araport11)	RUG1	A3	AT5G08710_ID8	AT5G08710_ID14	WT_3h	WT_0h
AT5G08710	Regulator of chromosome condensation (RCC1) family protein;(source:Araport11)	RUG1	A3	AT5G08710_s2	AT5G08710_ID14	WT_3h	WT_0h
AT5G08710	Regulator of chromosome condensation (RCC1) family protein;(source:Araport11)	RUG1	A5	AT5G08710_ID8	AT5G08710_ID14	WT_3h	WT_0h
AT5G08710	Regulator of chromosome condensation (RCC1) family protein;(source:Araport11)	RUG1	IR	AT5G08710_s2	AT5G08710_ID14	WT_3h	WT_0h
AT5G10320	ATP synthase subunit B;(source:Araport11)	NA	IR	AT5G10320_P2	AT5G10320_ID91	WT_3h	WT_0h
AT5G11250	Encodes an atypical TIR-NBS-LRR protein that is involved in stress responses. Loss of function alleles overproduce stress hormones JA,SA, ABA, and ET.	BURNOUT1	IR	AT5G11250_P1	AT5G11250_ID2	WT_3h	WT_0h
AT5G11250	Encodes an atypical TIR-NBS-LRR protein that is involved in stress responses. Loss of function alleles overproduce stress hormones JA,SA, ABA, and ET.	BURNOUT1	IR	AT5G11250_P1	AT5G11250_P2	WT_3h	WT_0h
AT5G11510	Arabidopsis thaliana putative c-myb-like transcription factor MYB3R-4. Functions in powdery mildew induced host endoreduplication at the site of infection. Activates mitotic gene expression, cytokinin response.	AtMYB3R4,MYB3R-4	A3	AT5G11510_P3	AT5G11510_JC6	WT_3h	WT_0h
AT5G11780	SNF2 domain protein;(source:Araport11)	NA	IR	AT5G11780_P1	AT5G11780_ID4	WT_3h	WT_0h
AT5G12040	Nitrilase/cyanide hydratase and apolipoprotein N-acyltransferase family protein;(source:Araport11)	NA	IR	AT5G12040.2	AT5G12040_P1	WT_3h	WT_0h
AT5G14850	Encodes a putative mannosyltransferase homolog to human PIG-B and yeast GPI10, both of which are involved in the biosynthesis of glycosylphosphatidylinositol (GPI) anchors. Disruption of the gene affects COBRA-LIKE10 localization, a GPI-anchored protein (GPI-AP) important for pollen tube growth and guidance.	APTG1	A3	AT5G14850_P4	AT5G14850_P6	WT_3h	WT_0h
AT5G14850	Encodes a putative mannosyltransferase homolog to human PIG-B and yeast GPI10, both of which are involved in the biosynthesis of glycosylphosphatidylinositol (GPI) anchors. Disruption of the gene affects COBRA-LIKE10 localization, a GPI-anchored protein (GPI-AP) important for pollen tube growth and guidance.	APTG1	A3	AT5G14850_P3	AT5G14850_P6	WT_3h	WT_0h
AT5G14850	Encodes a putative mannosyltransferase homolog to human PIG-B and yeast GPI10, both of which are involved in the biosynthesis of glycosylphosphatidylinositol (GPI) anchors. Disruption of the gene affects COBRA-LIKE10 localization, a GPI-anchored protein (GPI-AP) important for pollen tube growth and guidance.	APTG1	IR	AT5G14850_P4	AT5G14850_P6	WT_3h	WT_0h
AT5G15640	Mitochondrial substrate carrier family protein;(source:Araport11)	NA	A5	AT5G15640_c2	AT5G15640_P1	WT_3h	WT_0h
AT5G15720	Contains lipase signature motif and GDSL domain.	GLIP7	IR	AT5G15720_ID6	AT5G15720_P1	WT_3h	WT_0h
AT5G16110	hypothetical protein;(source:Araport11)	NA	IR	AT5G16110_P1	AT5G16110_JS1	WT_3h	WT_0h
AT5G16120	alpha/beta-Hydrolases superfamily protein;(source:Araport11)	MAGL15	A3	AT5G16120_JC6	AT5G16120_JS1	WT_3h	WT_0h
AT5G16120	alpha/beta-Hydrolases superfamily protein;(source:Araport11)	MAGL15	A5	AT5G16120_JC6	AT5G16120_JS1	WT_3h	WT_0h
AT5G16120	alpha/beta-Hydrolases superfamily protein;(source:Araport11)	MAGL15	A3	AT5G16120_JC6	AT5G16120_s1	WT_3h	WT_0h
AT5G16480	Encodes an atypical dual-speci&	AtPFA-DSP5,PFA-DSP5	ES	AT5G16480_P1	AT5G16480_c2	WT_3h	WT_0h
AT5G16880	Encodes a member of the Arabidopsis TOL (TOM1-LIKE) family of ubiquitin binding proteins that acts redundantly in the recognition and further endocytic sorting of a PIN-FORMED (PIN)-type auxin carrier protein at the plasma membrane, modulating dynamic auxin distribution and associated growth responses.	NA	A3	AT5G16880_P2	AT5G16880_P4	WT_3h	WT_0h
AT5G16880	Encodes a member of the Arabidopsis TOL (TOM1-LIKE) family of ubiquitin binding proteins that acts redundantly in the recognition and further endocytic sorting of a PIN-FORMED (PIN)-type auxin carrier protein at the plasma membrane, modulating dynamic auxin distribution and associated growth responses.	NA	IR	AT5G16880_P2	AT5G16880_P4	WT_3h	WT_0h
AT5G17230	Encodes phytoene synthase that is the rate-limiting enzyme in the carotenoid biosynthetic pathway and that interacts with the ORANGE (OR) protein. PSY's expression is posttransciptionally regulated by OR.	PSY	IR	AT5G17230_ID4	AT5G17230_P1	WT_3h	WT_0h
AT5G18255	Natural antisense transcript overlaps with AT5G18260;(source:Araport11)	NA	IR	AT5G18255_ID4	AT5G18255_ID3	WT_3h	WT_0h
AT5G19210	P-loop containing nucleoside triphosphate hydrolases superfamily protein;(source:Araport11)	NA	A3	AT5G19210.1	AT5G19210_ID2	WT_3h	WT_0h
AT5G19210	P-loop containing nucleoside triphosphate hydrolases superfamily protein;(source:Araport11)	NA	IR	AT5G19210.1	AT5G19210_ID2	WT_3h	WT_0h
AT5G19210	P-loop containing nucleoside triphosphate hydrolases superfamily protein;(source:Araport11)	NA	IR	AT5G19210_ID3	AT5G19210_P2	WT_3h	WT_0h
AT5G19460	nudix hydrolase homolog 20;(source:Araport11)	atnudt20,NUDT20	A3	AT5G19460_ID7	AT5G19460_P1	WT_3h	WT_0h
AT5G19460	nudix hydrolase homolog 20;(source:Araport11)	atnudt20,NUDT20	IR	AT5G19460_ID7	AT5G19460_P1	WT_3h	WT_0h
AT5G19950	tudor domain protein (DUF1767);(source:Araport11)	NA	IR	AT5G19950.1	AT5G19950.3	WT_3h	WT_0h
AT5G19950	tudor domain protein (DUF1767);(source:Araport11)	NA	IR	AT5G19950.1	AT5G19950_P2	WT_3h	WT_0h
AT5G20140	Encodes a haem-binding protein, HBP5. HBP5 binds haem and interacts with the haem oxygenase, HY1. Disrupting the binding of HBP5 to HY1 leads to oxidative stress.	AtHBP5,HBP5	A5	AT5G20140_ID43	AT5G20140.1	WT_3h	WT_0h
AT5G20140	Encodes a haem-binding protein, HBP5. HBP5 binds haem and interacts with the haem oxygenase, HY1. Disrupting the binding of HBP5 to HY1 leads to oxidative stress.	AtHBP5,HBP5	IR	AT5G20140_ID43	AT5G20140.1	WT_3h	WT_0h
AT5G21930	P-Type ATPase, mediates copper transport to chloroplast thylakoid lumen. Required for accumulation of copper-containing plastocyanin in the thylakoid lumen and for effective photosynthetic electron transport	ATHMA8,HMA8,PAA2	IR	AT5G21930_ID4	AT5G21930_ID3	WT_3h	WT_0h
AT5G23810	Encodes nonfunctional amino acid transporter. AAP7 is the most distantly related member of the AAP family, a group of well characterized amino acid transporters within the ATF1 superfamily. Expression of this gene has not been detected with RNA gel blots or promoter GUS studies.	AAP7	IR	AT5G23810_P1	AT5G23810_P4	WT_3h	WT_0h
AT5G24350	Member of MAG2 complex on the ER that is responsible for efficient transport of seed storage proteins, functions in protein transport between the ER and Golgi apparatus, contain a Zeste?White 10 (ZW10) domain and a Sec39 domain. Required for proper maturation of seed storage proteins.	MIP2	A3	AT5G24350.1	AT5G24350_P1	WT_3h	WT_0h
AT5G26770	NEAP2 is a member of a small family containing coiled-coil domains, a nuclear localization signal and a C-terminal predicted transmembrane domain. It localizes to the nuclear periphery. Mutants have altered nuclear morphology and chromatin structure.	AtNEAP2	A5	AT5G26770.3	AT5G26770_P2	WT_3h	WT_0h
AT5G26770	NEAP2 is a member of a small family containing coiled-coil domains, a nuclear localization signal and a C-terminal predicted transmembrane domain. It localizes to the nuclear periphery. Mutants have altered nuclear morphology and chromatin structure.	AtNEAP2	IR	AT5G26770.3	AT5G26770_P2	WT_3h	WT_0h
AT5G27830	Folate receptor family protein;(source:Araport11).Expression correlates with increase in bound folate in planta.	NA	A3	AT5G27830.5	AT5G27830.4	WT_3h	WT_0h
AT5G27830	Folate receptor family protein;(source:Araport11).Expression correlates with increase in bound folate in planta.	NA	A3	AT5G27830_P6	AT5G27830.4	WT_3h	WT_0h
AT5G27830	Folate receptor family protein;(source:Araport11).Expression correlates with increase in bound folate in planta.	NA	IR	AT5G27830.5	AT5G27830.4	WT_3h	WT_0h
AT5G27830	Folate receptor family protein;(source:Araport11).Expression correlates with increase in bound folate in planta.	NA	IR	AT5G27830_P6	AT5G27830.4	WT_3h	WT_0h
AT5G27830	Folate receptor family protein;(source:Araport11).Expression correlates with increase in bound folate in planta.	NA	A3	AT5G27830_P6	AT5G27830_P1	WT_3h	WT_0h
AT5G27830	Folate receptor family protein;(source:Araport11).Expression correlates with increase in bound folate in planta.	NA	A3	AT5G27830.5	AT5G27830_P1	WT_3h	WT_0h
AT5G27830	Folate receptor family protein;(source:Araport11).Expression correlates with increase in bound folate in planta.	NA	IR	AT5G27830_P6	AT5G27830_P1	WT_3h	WT_0h
AT5G37500	Encodes a guard cell outward potassium channel. Belongs to the Shaker family K+ channel. This family includes five groups based on phylogenetic analysis (FEBS Letters (2007) 581: 2357): I (inward rectifying channel): AKT1 (AT2G26650), AKT5 (AT4G32500) and SPIK (also known as AKT6, AT2G25600); II (inward rectifying channel): KAT1 (AT5G46240) and KAT2 (AT4G18290); III (weakly inward rectifying chan…	GORK	IR	AT5G37500_ID7	AT5G37500_ID4	WT_3h	WT_0h
AT5G37770	Encodes a protein with 40% similarity to calmodulin. Binds Ca(2+) and, as a consequence, undergoes conformational changes. CML24 expression occurs in all major organs, and transcript levels are increased from 2- to 15-fold in plants subjected to touch, darkness, heat, cold, hydrogen peroxide, abscisic acid (ABA), and indole-3-acetic acid. However, CML24 protein accumulation changes were not detec…	AtCML24,CML24,TCH2	IR	AT5G37770_P2	AT5G37770_c1	WT_3h	WT_0h
AT5G38660	mutant has Altered acclimation responses;	APE1	A3	AT5G38660_P1	AT5G38660.2	WT_3h	WT_0h
AT5G38660	mutant has Altered acclimation responses;	APE1	A5	AT5G38660_P1	AT5G38660.2	WT_3h	WT_0h
AT5G38660	mutant has Altered acclimation responses;	APE1	IR	AT5G38660_P1	AT5G38660.2	WT_3h	WT_0h
AT5G39360	EID1-like 2;(source:Araport11)	EDL2	IR	AT5G39360_ID2	AT5G39360.1	WT_3h	WT_0h
AT5G40500	hypothetical protein;(source:Araport11)	NA	A5	AT5G40500_ID1	AT5G40500_P2	WT_3h	WT_0h
AT5G40500	hypothetical protein;(source:Araport11)	NA	IR	AT5G40500_ID1	AT5G40500_P2	WT_3h	WT_0h
AT5G40720	C3H4 type zinc finger protein (DUF23);(source:Araport11)	NA	A5	AT5G40720_P1	AT5G40720_P2	WT_3h	WT_0h
AT5G40720	C3H4 type zinc finger protein (DUF23);(source:Araport11)	NA	A5	AT5G40720_P3	AT5G40720_P2	WT_3h	WT_0h
AT5G40720	C3H4 type zinc finger protein (DUF23);(source:Araport11)	NA	IR	AT5G40720_P1	AT5G40720_P2	WT_3h	WT_0h
AT5G41120	Esterase/lipase/thioesterase family protein;(source:Araport11)	NA	IR	AT5G41120_ID3	AT5G41120_ID2	WT_3h	WT_0h
AT5G42180	Peroxidase required for casparian strip lignification as well as partially required for SGN-dependent compensatory lignification.	PER64,PRX64	A3	AT5G42180_P1	AT5G42180_ID2	WT_3h	WT_0h
AT5G42180	Peroxidase required for casparian strip lignification as well as partially required for SGN-dependent compensatory lignification.	PER64,PRX64	A5	AT5G42180_P1	AT5G42180_ID2	WT_3h	WT_0h
AT5G42765	plasma membrane fusion protein;(source:Araport11)	NA	IR	AT5G42765_ID4	AT5G42765.1	WT_3h	WT_0h
AT5G42765	plasma membrane fusion protein;(source:Araport11)	NA	IR	AT5G42765_ID1	AT5G42765.1	WT_3h	WT_0h
AT5G42920	Encodes a component of the putative Arabidopsis THO/TREX complex: THO1 or HPR1 (At5g09860), THO2 (At1g24706), THO3 or TEX1 (At5g56130), THO5 (At5g42920, At1g45233), THO6 (At2g19430), and THO7 (At5g16790, At3g02950). THO/TREX complexes in animals have been implicated in the transport of mRNA precursors. Mutants of THO3/TEX1, THO1, THO6 accumulate reduced amount of small interfering (si)RNA, sugges…	AtTHO5,THO5	IR	AT5G42920_P2	AT5G42920_P1	WT_3h	WT_0h
AT5G43630	Encodes a zinc knuckle protein that negatively regulates morning specific growth. The role of TZP in hypocotyl elongation was established through a QTL analysis of BayXSha RIL populations. The Bay-0 allele contains a deletion causing a frameshift mutation. TZP is under circadian control and acts to regulate morning-specific hypocotyl growth. The mRNA is cell-to-cell mobile.	TZP	IR	AT5G43630_P3	AT5G43630_P2	WT_3h	WT_0h
AT5G48000	Encodes a member of the CYP708A family of cytochrome P450 enzymes. THAH appears to add a hydroxyl group to the triterpene thalianol. thah1 mutants have an elevated accumulation of thalianol. thah1-1 mutants have longer roots than wild type plants. Thalian-diol and desaturated thalian-diol are lost from the root extracts of thah1-1 mutants. Overexpression of the sequence from At5g48000.1 rescues t…	CYP708_A2,CYP708A2,THAH,THAH1	A3	AT5G48000_P1	AT5G48000_P6	WT_3h	WT_0h
AT5G48000	Encodes a member of the CYP708A family of cytochrome P450 enzymes. THAH appears to add a hydroxyl group to the triterpene thalianol. thah1 mutants have an elevated accumulation of thalianol. thah1-1 mutants have longer roots than wild type plants. Thalian-diol and desaturated thalian-diol are lost from the root extracts of thah1-1 mutants. Overexpression of the sequence from At5g48000.1 rescues t…	CYP708_A2,CYP708A2,THAH,THAH1	A5	AT5G48000_P1	AT5G48000_P6	WT_3h	WT_0h
AT5G48000	Encodes a member of the CYP708A family of cytochrome P450 enzymes. THAH appears to add a hydroxyl group to the triterpene thalianol. thah1 mutants have an elevated accumulation of thalianol. thah1-1 mutants have longer roots than wild type plants. Thalian-diol and desaturated thalian-diol are lost from the root extracts of thah1-1 mutants. Overexpression of the sequence from At5g48000.1 rescues t…	CYP708_A2,CYP708A2,THAH,THAH1	IR	AT5G48000_P1	AT5G48000_P6	WT_3h	WT_0h
AT5G48880	Encodes a peroxisomal 3-keto-acyl-CoA thiolase 2 precursor. EC2.3.1.16 thiolases. AT5G48880.1 is named PKT1 and AT5G48880.2 is named PKT2.	KAT5,PKT1,PKT2	ES	AT5G48880_P1	AT5G48880_P4	WT_3h	WT_0h
AT5G51170	U6 snRNA phosphodiesterase-like protein;(source:Araport11)	AtUSB1	A5	AT5G51170_ID5	AT5G51170.1	WT_3h	WT_0h
AT5G51410	LUC7 N terminus domain-containing protein;(source:Araport11)	LUC7RL	A3	AT5G51410_P2	AT5G51410_P1	WT_3h	WT_0h
AT5G51410	LUC7 N terminus domain-containing protein;(source:Araport11)	LUC7RL	A5	AT5G51410_P2	AT5G51410_P1	WT_3h	WT_0h
AT5G52100	Is essential for chloroplast NAD(P)H dehydrogenase activity, which is involved in electron transfer between PSII and PSI. Likely functions in biogenesis or stabilization of the NAD(P)H dehydrogenase complex. The mRNA is cell-to-cell mobile.	CRR1	A3	AT5G52100_ID7	AT5G52100_P1	WT_3h	WT_0h
AT5G52100	Is essential for chloroplast NAD(P)H dehydrogenase activity, which is involved in electron transfer between PSII and PSI. Likely functions in biogenesis or stabilization of the NAD(P)H dehydrogenase complex. The mRNA is cell-to-cell mobile.	CRR1	A5	AT5G52100_ID11	AT5G52100_P1	WT_3h	WT_0h
AT5G53350	CLP protease regulatory subunit CLPX mRNA, nuclear gene	CLPX	IR	AT5G53350_P1	AT5G53350_ID5	WT_3h	WT_0h
AT5G53580	NAD(P)-linked oxidoreductase superfamily protein;(source:Araport11)	AtPLR1,PLR1	A5	AT5G53580_s3	AT5G53580_P1	WT_3h	WT_0h
AT5G53900	Serine/threonine-protein kinase WNK (With No Lysine)-like protein;(source:Araport11)	NA	A5	AT5G53900_c1	AT5G53900_P2	WT_3h	WT_0h
AT5G55600	Agenet and bromo-adjacent homology (BAH) domain-containing protein;(source:Araport11)	NA	IR	AT5G55600_P2	AT5G55600_P1	WT_3h	WT_0h
AT5G55810	encodes a bi-functional enzyme that expresses both nicotinamide-nucleotide adenylyltransferase (2.7.7.1) and nicotinate-nucleotide adenylyltransferase (2.7.7.18)activity.	AtNMNAT,NMNAT	A3	AT5G55810_ID5	AT5G55810.1	WT_3h	WT_0h
AT5G55810	encodes a bi-functional enzyme that expresses both nicotinamide-nucleotide adenylyltransferase (2.7.7.1) and nicotinate-nucleotide adenylyltransferase (2.7.7.18)activity.	AtNMNAT,NMNAT	A3	AT5G55810_ID5	AT5G55810_ID1	WT_3h	WT_0h
AT5G55810	encodes a bi-functional enzyme that expresses both nicotinamide-nucleotide adenylyltransferase (2.7.7.1) and nicotinate-nucleotide adenylyltransferase (2.7.7.18)activity.	AtNMNAT,NMNAT	IR	AT5G55810_ID5	AT5G55810_ID1	WT_3h	WT_0h
AT5G55810	encodes a bi-functional enzyme that expresses both nicotinamide-nucleotide adenylyltransferase (2.7.7.1) and nicotinate-nucleotide adenylyltransferase (2.7.7.18)activity.	AtNMNAT,NMNAT	A5	AT5G55810_ID5	AT5G55810_ID6	WT_3h	WT_0h
AT5G56240	hapless protein;(source:Araport11)	NA	A5	AT5G56240.1	AT5G56240_s2	WT_3h	WT_0h
AT5G56240	hapless protein;(source:Araport11)	NA	IR	AT5G56240.1	AT5G56240_s2	WT_3h	WT_0h
AT5G57565	Protein kinase superfamily protein;(source:Araport11)	NA	A5	AT5G57565_P3	AT5G57565_P4	WT_3h	WT_0h
AT5G57565	Protein kinase superfamily protein;(source:Araport11)	NA	IR	AT5G57565_P3	AT5G57565_P4	WT_3h	WT_0h
AT5G57565	Protein kinase superfamily protein;(source:Araport11)	NA	IR	AT5G57565_P3	AT5G57565_P7	WT_3h	WT_0h
AT5G57670	Protein kinase superfamily protein;(source:Araport11)	NA	IR	AT5G57670_ID4	AT5G57670_P2	WT_3h	WT_0h
AT5G57880	Encodes MULTIPOLAR SPINDLE 1 (MPS1), involved in meiotic spindle organization.	ATPRD2,MPS1,PRD2	A5	AT5G57880_P1	AT5G57880_ID3	WT_3h	WT_0h
AT5G57880	Encodes MULTIPOLAR SPINDLE 1 (MPS1), involved in meiotic spindle organization.	ATPRD2,MPS1,PRD2	IR	AT5G57880_P1	AT5G57880_ID3	WT_3h	WT_0h
AT5G57880	Encodes MULTIPOLAR SPINDLE 1 (MPS1), involved in meiotic spindle organization.	ATPRD2,MPS1,PRD2	A5	AT5G57880_P1	AT5G57880_ID4	WT_3h	WT_0h
AT5G57880	Encodes MULTIPOLAR SPINDLE 1 (MPS1), involved in meiotic spindle organization.	ATPRD2,MPS1,PRD2	IR	AT5G57880_P1	AT5G57880_ID4	WT_3h	WT_0h
AT5G58410	HEAT/U-box domain-containing protein;(source:Araport11)	NA	A5	AT5G58410_c1	AT5G58410_P2	WT_3h	WT_0h
AT5G58540	Protein kinase superfamily protein;(source:Araport11)	NA	A3	AT5G58540.2	AT5G58540.1	WT_3h	WT_0h
AT5G58540	Protein kinase superfamily protein;(source:Araport11)	NA	A3	AT5G58540.2	AT5G58540.3	WT_3h	WT_0h
AT5G58540	Protein kinase superfamily protein;(source:Araport11)	NA	IR	AT5G58540.2	AT5G58540.3	WT_3h	WT_0h
AT5G59140	BTB/POZ domain-containing protein;(source:Araport11)	NA	IR	AT5G59140_P1	AT5G59140_ID2	WT_3h	WT_0h
AT5G59220	Encodes a member of the PP2C family (Clade A protein phosphatases type 2C). Functions as a negative regulator of osmotic stress and ABA signaling.	HAI1,SAG113	IR	AT5G59220_P2	AT5G59220_P1	WT_3h	WT_0h
AT5G59430	Encodes a telomeric repeat binding protein with a DNA binding domain at its C terminus. The DNA binding domain has a preference for GGTTTAG sequences and at least five of these repeats are required for recognition by a nearly full-length TRP1 protein.	ATTRP1,TRP1	IR	AT5G59430_P2	AT5G59430_P5	WT_3h	WT_0h
AT5G60100	Encodes pseudo-response regulator 3 (APRR3/PRR3). PRR3 transcript levels vary in a circadian pattern with peak expression at dusk under long and short day conditions. PRR3 affects the period of the circadian clock and seedlings with reduced levels of PRR3 have shorter periods, based on transcriptional assays of clock-regulated genes. PRR3 is expressed in the vasculature of cotyledons and leaves w…	APRR3,PRR3	IR	AT5G60100_P5	AT5G60100_P1	WT_3h	WT_0h
AT5G60100	Encodes pseudo-response regulator 3 (APRR3/PRR3). PRR3 transcript levels vary in a circadian pattern with peak expression at dusk under long and short day conditions. PRR3 affects the period of the circadian clock and seedlings with reduced levels of PRR3 have shorter periods, based on transcriptional assays of clock-regulated genes. PRR3 is expressed in the vasculature of cotyledons and leaves w…	APRR3,PRR3	A3	AT5G60100_P5	AT5G60100_P3	WT_3h	WT_0h
AT5G60100	Encodes pseudo-response regulator 3 (APRR3/PRR3). PRR3 transcript levels vary in a circadian pattern with peak expression at dusk under long and short day conditions. PRR3 affects the period of the circadian clock and seedlings with reduced levels of PRR3 have shorter periods, based on transcriptional assays of clock-regulated genes. PRR3 is expressed in the vasculature of cotyledons and leaves w…	APRR3,PRR3	IR	AT5G60100_P5	AT5G60100_P3	WT_3h	WT_0h
AT5G60540	Encodes a protein predicted to function in tandem with PDX1 to form glutamine amidotransferase complex with involved in vitamin B6 biosynthesis. PDX2 is predicted to function as glutaminase within the complex.	ATPDX2,EMB2407,PDX2	IR	AT5G60540_c1	AT5G60540.1	WT_3h	WT_0h
AT5G61030	Encodes a glycine-rich RNA binding protein that is involved in C-> U RNA editing in mitochondria. Gene expression is induced by cold. The mRNA is cell-to-cell mobile.	GR-RBP3,ORRM3,RBGA7	A3	AT5G61030_ID30	AT5G61030_ID24	WT_3h	WT_0h
AT5G61030	Encodes a glycine-rich RNA binding protein that is involved in C-> U RNA editing in mitochondria. Gene expression is induced by cold. The mRNA is cell-to-cell mobile.	GR-RBP3,ORRM3,RBGA7	MES	AT5G61030_ID30	AT5G61030_ID24	WT_3h	WT_0h
AT5G61190	putative endonuclease or glycosyl hydrolase with C2H2-type zinc finger domain-containing protein;(source:Araport11)	NA	A3	AT5G61190_P2	AT5G61190_s3	WT_3h	WT_0h
AT5G61190	putative endonuclease or glycosyl hydrolase with C2H2-type zinc finger domain-containing protein;(source:Araport11)	NA	A3	AT5G61190_JS16	AT5G61190_s3	WT_3h	WT_0h
AT5G61190	putative endonuclease or glycosyl hydrolase with C2H2-type zinc finger domain-containing protein;(source:Araport11)	NA	IR	AT5G61190_P2	AT5G61190_s3	WT_3h	WT_0h
AT5G61880	Encodes PAM16L, a paralog of PAM16 (AT3G59280).	AtPAM16L,PAM16L	A3	AT5G61880_P3	AT5G61880_ID4	WT_3h	WT_0h
AT5G61880	Encodes PAM16L, a paralog of PAM16 (AT3G59280).	AtPAM16L,PAM16L	A5	AT5G61880_P3	AT5G61880_ID4	WT_3h	WT_0h
AT5G62570	Calmodulin binding protein-like protein;(source:Araport11)	CBP60a	A3	AT5G62570_P1	AT5G62570_ID14	WT_3h	WT_0h
AT5G62570	Calmodulin binding protein-like protein;(source:Araport11)	CBP60a	IR	AT5G62570_P1	AT5G62570_ID14	WT_3h	WT_0h
AT5G62570	Calmodulin binding protein-like protein;(source:Araport11)	CBP60a	A3	AT5G62570_ID15	AT5G62570_P4	WT_3h	WT_0h
AT5G62570	Calmodulin binding protein-like protein;(source:Araport11)	CBP60a	IR	AT5G62570_P1	AT5G62570_P4	WT_3h	WT_0h
AT5G62570	Calmodulin binding protein-like protein;(source:Araport11)	CBP60a	IR	AT5G62570_ID15	AT5G62570_P4	WT_3h	WT_0h
AT5G63490	CBS / octicosapeptide/Phox/Bemp1 (PB1) domains-containing protein;(source:Araport11)	NA	A3	AT5G63490_ID9	AT5G63490_ID22	WT_3h	WT_0h
AT5G63490	CBS / octicosapeptide/Phox/Bemp1 (PB1) domains-containing protein;(source:Araport11)	NA	IR	AT5G63490_ID14	AT5G63490_ID22	WT_3h	WT_0h
AT5G63490	CBS / octicosapeptide/Phox/Bemp1 (PB1) domains-containing protein;(source:Araport11)	NA	IR	AT5G63490_ID9	AT5G63490_ID22	WT_3h	WT_0h
AT5G64360	EIP9 interacts with EMF1 to regulate flowering. It functions partially redundantly with SDJ2 and SDJ3 and interacts with SUVH1 and SUVH3 to form a SUVH-SDJ complex. The complex binds promoters with DNA methylation and mediates transcriptional activation of promoter methylated genes.	EIP9,SDJ1	IR	AT5G64360_P7	AT5G64360_P2	WT_3h	WT_0h
AT5G64360	EIP9 interacts with EMF1 to regulate flowering. It functions partially redundantly with SDJ2 and SDJ3 and interacts with SUVH1 and SUVH3 to form a SUVH-SDJ complex. The complex binds promoters with DNA methylation and mediates transcriptional activation of promoter methylated genes.	EIP9,SDJ1	IR	AT5G64360_P6	AT5G64360_P2	WT_3h	WT_0h
AT5G64360	EIP9 interacts with EMF1 to regulate flowering. It functions partially redundantly with SDJ2 and SDJ3 and interacts with SUVH1 and SUVH3 to form a SUVH-SDJ complex. The complex binds promoters with DNA methylation and mediates transcriptional activation of promoter methylated genes.	EIP9,SDJ1	IR	AT5G64360_P6	AT5G64360_P3	WT_3h	WT_0h
AT5G64360	EIP9 interacts with EMF1 to regulate flowering. It functions partially redundantly with SDJ2 and SDJ3 and interacts with SUVH1 and SUVH3 to form a SUVH-SDJ complex. The complex binds promoters with DNA methylation and mediates transcriptional activation of promoter methylated genes.	EIP9,SDJ1	IR	AT5G64360_P7	AT5G64360_P3	WT_3h	WT_0h
AT5G64390	encodes a K homology (KH) domain-containing, putative RNA binding protein that interacts with HUA1, a CCCH zinc finger RNA binding protein in the nucleus. HEN4 acts redundantly with HUA1 and HUA2 in the specification of floral organ identity in the third whorl. The mRNA is cell-to-cell mobile.	HEN4	IR	AT5G64390.2	AT5G64390.1	WT_3h	WT_0h
AT5G64850	sorbin/SH3 domain protein;(source:Araport11)	NA	IR	AT5G64850_c1	AT5G64850_P1	WT_3h	WT_0h
AT5G65685	SS5 is a chloroplast-localized protein that is related to the canonical starch synthases (most closely to SS4), but is catalytically inactive. Arabidopsis ss5 mutants have near-normal total transitory starch contents, but produce fewer and larger starch granules in their chloroplast. SS5 can bind to starch in vitro, and interacts with MRC/PII1 in vivo.	NA	A5	AT5G65685_ID2	AT5G65685_ID24	WT_3h	WT_0h
AT5G65685	SS5 is a chloroplast-localized protein that is related to the canonical starch synthases (most closely to SS4), but is catalytically inactive. Arabidopsis ss5 mutants have near-normal total transitory starch contents, but produce fewer and larger starch granules in their chloroplast. SS5 can bind to starch in vitro, and interacts with MRC/PII1 in vivo.	NA	IR	AT5G65685_ID2	AT5G65685_ID24	WT_3h	WT_0h
AT5G65740	zinc ion binding protein;(source:Araport11)	NA	IR	AT5G65740_ID15	AT5G65740_JS13	WT_3h	WT_0h
AT5G66055	A locus involved in embryogenesis. Mutations in this locus result in embryo lethality.	AKRP,EMB16,EMB2036	IR	AT5G66055_P1	AT5G66055_ID3	WT_3h	WT_0h
AT5G66055	A locus involved in embryogenesis. Mutations in this locus result in embryo lethality.	AKRP,EMB16,EMB2036	IR	AT5G66055_P1	AT5G66055_P2	WT_3h	WT_0h
AT5G67540	Arabinanase/levansucrase/invertase;(source:Araport11)	NA	A3	AT5G67540_P1	AT5G67540_s1	WT_3h	WT_0h
AT5G67540	Arabinanase/levansucrase/invertase;(source:Araport11)	NA	IR	AT5G67540_P1	AT5G67540_s1	WT_3h	WT_0h

## Sheet: WT_3h_vs_WT_24h
GeneID	Description	Aliases	Mechanism	Isoform1	Isoform2	Time1	Time2
AT1G01160	Arabidopsis thaliana GRF1-interacting factor 2 (GIF2) mRNA	GIF2	IR	AT1G01160_s1	AT1G01160.1	WT_24h	WT_3h
AT1G01340	member of Cyclic nucleotide gated channel family	ACBK1,ATCNGC10,CNGC10	ES	AT1G01340_JS2	AT1G01340_P2	WT_24h	WT_3h
AT1G03070	Bax inhibitor-1 family protein;(source:Araport11)	AtLFG4,LFG4	A5	AT1G03070_P1	AT1G03070_P2	WT_24h	WT_3h
AT1G03190	UV damage and heat induce a common stress response in plants that leads to tissue death and reduced chloroplast function. The UVH6 product is suggested to be a negative regulator of this response.	ATXPD,UVH6	IR	AT1G03190_P1	AT1G03190.2	WT_24h	WT_3h
AT1G03370	C2 calcium/lipid-binding and GRAM domain containing protein;(source:Araport11)	NA	IR	AT1G03370_P1	AT1G03370_P2	WT_24h	WT_3h
AT1G04350	encodes a protein whose sequence is similar to 2-oxoglutarate-dependent dioxygenase	NA	IR	AT1G04350_ID2	AT1G04350_c1	WT_24h	WT_3h
AT1G04550	IAA12/BDL plays a role in auxin-mediated processes of apical-basal patterning in the embryo. bdl mutants lack a primary root meristem	BDL,IAA12	A3	AT1G04550.1	AT1G04550_ID7	WT_24h	WT_3h
AT1G04550	IAA12/BDL plays a role in auxin-mediated processes of apical-basal patterning in the embryo. bdl mutants lack a primary root meristem	BDL,IAA12	IR	AT1G04550.1	AT1G04550_ID7	WT_24h	WT_3h
AT1G05090	dentin sialophosphoprotein-like protein;(source:Araport11)	NA	IR	AT1G05090_ID2	AT1G05090.1	WT_24h	WT_3h
AT1G05160	Encodes an ent-kaurenoic acid hydroxylase, a member of the CYP88A cytochrome p450 family.	ATKAO1,CYP88A3,KAO1	A3	AT1G05160_ID12	AT1G05160_ID4	WT_24h	WT_3h
AT1G05160	Encodes an ent-kaurenoic acid hydroxylase, a member of the CYP88A cytochrome p450 family.	ATKAO1,CYP88A3,KAO1	A3	AT1G05160.1	AT1G05160_ID4	WT_24h	WT_3h
AT1G05160	Encodes an ent-kaurenoic acid hydroxylase, a member of the CYP88A cytochrome p450 family.	ATKAO1,CYP88A3,KAO1	IR	AT1G05160_ID12	AT1G05160_ID4	WT_24h	WT_3h
AT1G05160	Encodes an ent-kaurenoic acid hydroxylase, a member of the CYP88A cytochrome p450 family.	ATKAO1,CYP88A3,KAO1	IR	AT1G05160.1	AT1G05160_ID4	WT_24h	WT_3h
AT1G05385	Encodes a Psb27 homolog involved in photosystem II biogenesis.	LPA19,Psb27-H1	IR	AT1G05385_ID2	AT1G05385_P1	WT_24h	WT_3h
AT1G05385	Encodes a Psb27 homolog involved in photosystem II biogenesis.	LPA19,Psb27-H1	IR	AT1G05385_ID2	AT1G05385_P2	WT_24h	WT_3h
AT1G05410	CDPK adapter, putative (DUF1423);(source:Araport11)	NA	A3	AT1G05410_P1	AT1G05410_ID15	WT_24h	WT_3h
AT1G05785	Got1/Sft2-like vescicle transport protein family;(source:Araport11)	NA	A3	AT1G05785_P1	AT1G05785_P6	WT_24h	WT_3h
AT1G05785	Got1/Sft2-like vescicle transport protein family;(source:Araport11)	NA	IR	AT1G05785_P1	AT1G05785_P6	WT_24h	WT_3h
AT1G05870	hypothetical protein (DUF1685);(source:Araport11)	NA	IR	AT1G05870_s5	AT1G05870_P2	WT_24h	WT_3h
AT1G06190	Encodes a novel ribonucleic acid-binding protein that interacts with the endonuclease RNase E and supports its function in processing plastid ribonucleic acids.	RHON1	IR	AT1G06190_P1	AT1G06190.2	WT_24h	WT_3h
AT1G06220	Encodes a protein with similarity to splicing factor Snu114. Snu114 is thought to be involved in activation of the splicosome. Loss of GFA1 function results in reduced female fertility. Approximately 50% of ovules abort due to defects in the female gametophyte. In mutant gametophytes antipodal cells express egg cell markers suggesting a defect in specification of cell fate.GFA1 is also required t…	CLO,GFA1,MEE5	ES	AT1G06220_P1	AT1G06220_P2	WT_24h	WT_3h
AT1G07135	glycine-rich protein;(source:Araport11)	NA	IR	AT1G07135_P1	AT1G07135_s1	WT_24h	WT_3h
AT1G07720	Encodes KCS3, a member of the 3-ketoacyl-CoA synthase family involved in the biosynthesis of VLCFA (very long chain fatty acids).	KCS3	IR	AT1G07720_P2	AT1G07720_JC2	WT_24h	WT_3h
AT1G07780	Encodes phosphoribosylanthranilate isomerase which catalyzes the third step of the tryptophan biosynthetic pathway. Member of gene family. The mRNA is cell-to-cell mobile.	PAI1,TRP6	ES	AT1G07780_P1	AT1G07780_P2	WT_24h	WT_3h
AT1G07950	Surfeit locus protein 5 subunit 22 of Mediator complex;(source:Araport11)	MED22B	A3	AT1G07950_JS1	AT1G07950.1	WT_24h	WT_3h
AT1G07950	Surfeit locus protein 5 subunit 22 of Mediator complex;(source:Araport11)	MED22B	IR	AT1G07950_JS1	AT1G07950.1	WT_24h	WT_3h
AT1G08490	Chloroplastic NifS-like protein that can catalyze the conversion of cysteine into alanine and elemental sulfur (S(0)) and of selenocysteine into alanine and elemental Se (Se(0)). Overexpression enhances selenium tolerance and accumulation.	ATCPNIFS,ATNFS2,ATSUFS,CPNIFS,SUFS	A3	AT1G08490_c1	AT1G08490_P1	WT_24h	WT_3h
AT1G09300	Encodes a mitochondrial protease ICP55. Alters the stability of proteins by removal of a single amino acid from their sequence.	AtICP55	IR	AT1G09300.2	AT1G09300_P1	WT_24h	WT_3h
AT1G09530	Transcription factor interacting with photoreceptors phyA and phyB. Forms a ternary complex in vitro with G-box element of the promoters of LHY, CCA1. Acts as a negative regulator of phyB signalling. It degrades rapidly after irradiation of dark grown seedlings in a process controlled by phytochromes. Does not play a significant role in controlling light input and function of the circadian clockw…	PAP3,PIF3	A5	AT1G09530_P1	AT1G09530_JS7	WT_24h	WT_3h
AT1G09530	Transcription factor interacting with photoreceptors phyA and phyB. Forms a ternary complex in vitro with G-box element of the promoters of LHY, CCA1. Acts as a negative regulator of phyB signalling. It degrades rapidly after irradiation of dark grown seedlings in a process controlled by phytochromes. Does not play a significant role in controlling light input and function of the circadian clockw…	PAP3,PIF3	IR	AT1G09530_P1	AT1G09530_JS7	WT_24h	WT_3h
AT1G09890	Rhamnogalacturonate lyase family protein;(source:Araport11)	NA	A3	AT1G09890_JS1	AT1G09890_P4	WT_24h	WT_3h
AT1G09995	DNA repair DEAD helicase RAD3/XP-D subfamily protein;(source:Araport11)	NA	A3	AT1G09995_P3	AT1G09995_P1	WT_24h	WT_3h
AT1G09995	DNA repair DEAD helicase RAD3/XP-D subfamily protein;(source:Araport11)	NA	A3	AT1G09995_P2	AT1G09995_P1	WT_24h	WT_3h
AT1G09995	DNA repair DEAD helicase RAD3/XP-D subfamily protein;(source:Araport11)	NA	IR	AT1G09995_P2	AT1G09995_P1	WT_24h	WT_3h
AT1G09995	DNA repair DEAD helicase RAD3/XP-D subfamily protein;(source:Araport11)	NA	IR	AT1G09995_P3	AT1G09995_P1	WT_24h	WT_3h
AT1G10670	One of the three genes encoding subunit A of the trimeric protein ATP Citrate Lyase. Antisense ACLA-1 plants cause a reduction in cytosolic acetyl-CoA metabolism and have upregulation of stress-related genes and down-regulation of primary metabolism and growth genes, suggesting the mutation restricts normal growth and developmental processes and puts the plant into a state of stress.	ACLA-1	IR	AT1G10670_P2	AT1G10670_c1	WT_24h	WT_3h
AT1G11850	transmembrane protein;(source:Araport11)	NA	A3	AT1G11850_P2	AT1G11850.3	WT_24h	WT_3h
AT1G11850	transmembrane protein;(source:Araport11)	NA	A5	AT1G11850_P2	AT1G11850.3	WT_24h	WT_3h
AT1G11850	transmembrane protein;(source:Araport11)	NA	IR	AT1G11850_P2	AT1G11850.3	WT_24h	WT_3h
AT1G11850	transmembrane protein;(source:Araport11)	NA	A5	AT1G11850_P2	AT1G11850_c1	WT_24h	WT_3h
AT1G11850	transmembrane protein;(source:Araport11)	NA	IR	AT1G11850_P2	AT1G11850_c1	WT_24h	WT_3h
AT1G13000	transmembrane protein, putative (DUF707);(source:Araport11)	NA	IR	AT1G13000_P1	AT1G13000_P3	WT_24h	WT_3h
AT1G13060	Encodes 20S proteasome beta subunit PBE1 (PBE1).	PBE1	A5	AT1G13060_P1	AT1G13060_ID64	WT_24h	WT_3h
AT1G13060	Encodes 20S proteasome beta subunit PBE1 (PBE1).	PBE1	MES	AT1G13060_P1	AT1G13060_ID64	WT_24h	WT_3h
AT1G13450	Encodes GT-1, a plant transcription factor that binds to one of the cis-acting elements, BoxII, which resides within the upstream promoter region of light-responsive genes. GT-1 was assumed to act as a molecular switch modulated through Ca(2+)-dependent phosphorylation/dephosphorylation in response to light signals.	GT-1	A5	AT1G13450_ID3	AT1G13450_ID2	WT_24h	WT_3h
AT1G13650	hypothetical protein;(source:Araport11)	NA	IR	AT1G13650_P3	AT1G13650_P4	WT_24h	WT_3h
AT1G14150	Encodes a subunit of the NAD(P)H dehydrogenase complex located in the chloroplast thylakoid lumen.	PnsL2,PQL1,PQL2	A5	AT1G14150.1	AT1G14150_c1	WT_24h	WT_3h
AT1G14270	CAAX amino terminal protease family protein;(source:Araport11)	NA	A3	AT1G14270.4	AT1G14270_P1	WT_24h	WT_3h
AT1G14270	CAAX amino terminal protease family protein;(source:Araport11)	NA	A3	AT1G14270.3	AT1G14270_P1	WT_24h	WT_3h
AT1G14270	CAAX amino terminal protease family protein;(source:Araport11)	NA	IR	AT1G14270.4	AT1G14270_P1	WT_24h	WT_3h
AT1G14660	member of putative Na+/H+ antiporter (AtNHX) family. Functions as a plasma membrane Li+/H+ antiporter. Involved in Li+ efflux and detoxification.	ATNHX8,NHX8,NHX8	IR	AT1G14660_c2	AT1G14660_c1	WT_24h	WT_3h
AT1G14685	Encodes a member of the BASIC PENTACYSTEINE (BPC) proteins. BPC proteins are plant-specific transcription factors present throughout land plants. BPC transcription factor family is integral for a wide range of processes that support normal growth and development.Along with BPC1, BPC2 binds to the promoter of and represses GALS1 thereby reducing beta 1,4- galactan accumulation.	ATBPC2,BBR/BPC2,BPC2	A5	AT1G14685_s2	AT1G14685_s1	WT_24h	WT_3h
AT1G14685	Encodes a member of the BASIC PENTACYSTEINE (BPC) proteins. BPC proteins are plant-specific transcription factors present throughout land plants. BPC transcription factor family is integral for a wide range of processes that support normal growth and development.Along with BPC1, BPC2 binds to the promoter of and represses GALS1 thereby reducing beta 1,4- galactan accumulation.	ATBPC2,BBR/BPC2,BPC2	IR	AT1G14685_s2	AT1G14685_s1	WT_24h	WT_3h
AT1G15500	TLC ATP/ADP transporter;(source:Araport11)	ATNTT2	IR	AT1G15500_JS1	AT1G15500_P1	WT_24h	WT_3h
AT1G15660	Encodes a homologue of the human centromeric protein C (CENP-C). CENP-C co-localizes with the 180 bp centromeric regions of chromosomes throughout the cell cycle, but does not completely cover the 180 bp regions.	CENP-C,CENP-C	A3	AT1G15660_s1	AT1G15660_P1	WT_24h	WT_3h
AT1G15690	Encodes a H(+)-translocating (pyrophosphate-energized) inorganic pyrophosphatase (H(+)-PPase; EC 3.6.1.1) located in the vacuolar membrane. Expression is found in all tissues examined, including meristems and floral organ primordium. Expression is particularly enhanced in pollen, and is repressed by light. Over expression and loss of function phenotypes suggest AVP1 is involved in regulation of a…	AtAVP1,ATAVP3,AtVHP1,AVP-3,AVP1,FUGU5,VHP1	A3	AT1G15690_ID11	AT1G15690.2	WT_24h	WT_3h
AT1G15690	Encodes a H(+)-translocating (pyrophosphate-energized) inorganic pyrophosphatase (H(+)-PPase; EC 3.6.1.1) located in the vacuolar membrane. Expression is found in all tissues examined, including meristems and floral organ primordium. Expression is particularly enhanced in pollen, and is repressed by light. Over expression and loss of function phenotypes suggest AVP1 is involved in regulation of a…	AtAVP1,ATAVP3,AtVHP1,AVP-3,AVP1,FUGU5,VHP1	A5	AT1G15690_ID11	AT1G15690.2	WT_24h	WT_3h
AT1G15690	Encodes a H(+)-translocating (pyrophosphate-energized) inorganic pyrophosphatase (H(+)-PPase; EC 3.6.1.1) located in the vacuolar membrane. Expression is found in all tissues examined, including meristems and floral organ primordium. Expression is particularly enhanced in pollen, and is repressed by light. Over expression and loss of function phenotypes suggest AVP1 is involved in regulation of a…	AtAVP1,ATAVP3,AtVHP1,AVP-3,AVP1,FUGU5,VHP1	ES	AT1G15690_ID11	AT1G15690.2	WT_24h	WT_3h
AT1G17090	transmembrane protein;(source:Araport11)	NA	A3	AT1G17090_P3	AT1G17090_ID2	WT_24h	WT_3h
AT1G17090	transmembrane protein;(source:Araport11)	NA	IR	AT1G17090_P3	AT1G17090_ID2	WT_24h	WT_3h
AT1G18270	ketose-bisphosphate aldolase class-II family protein;(source:Araport11)	NA	IR	AT1G18270_P1	AT1G18270_P4	WT_24h	WT_3h
AT1G18335	Acyl-CoA N-acyltransferases (NAT) superfamily protein;(source:Araport11)	NA	A3	AT1G18335_P3	AT1G18335_P2	WT_24h	WT_3h
AT1G18335	Acyl-CoA N-acyltransferases (NAT) superfamily protein;(source:Araport11)	NA	IR	AT1G18335_P3	AT1G18335_P2	WT_24h	WT_3h
AT1G18700	DNAJ heat shock N-terminal domain-containing protein;(source:Araport11)	NA	IR	AT1G18700_P1	AT1G18700_P2	WT_24h	WT_3h
AT1G18870	Encodes a protein with isochorismate synthase activity involved in phylloquinone biosynthesis. Mutant studies of this gene's function suggest that its function is redundant with that of ICS1 (AT1G7410).	ATICS2,ICS2	A3	AT1G18870_ID5	AT1G18870_ID8	WT_24h	WT_3h
AT1G18870	Encodes a protein with isochorismate synthase activity involved in phylloquinone biosynthesis. Mutant studies of this gene's function suggest that its function is redundant with that of ICS1 (AT1G7410).	ATICS2,ICS2	IR	AT1G18870_ID5	AT1G18870_ID8	WT_24h	WT_3h
AT1G19000	Homeodomain-like superfamily protein;(source:Araport11)	NA	A3	AT1G19000_P2	AT1G19000_ID16	WT_24h	WT_3h
AT1G19000	Homeodomain-like superfamily protein;(source:Araport11)	NA	A5	AT1G19000_P2	AT1G19000_ID16	WT_24h	WT_3h
AT1G19080	This gene is predicted to encode a PSF3 component of the GINS complex. This complex has been implicated in the initiation of DNA replication in Xenopus. Mutations in this gene cause defects in embryo development.	PSF3,TTN10	ES	AT1G19080_ID5	AT1G19080_JC5	WT_24h	WT_3h
AT1G19080	This gene is predicted to encode a PSF3 component of the GINS complex. This complex has been implicated in the initiation of DNA replication in Xenopus. Mutations in this gene cause defects in embryo development.	PSF3,TTN10	IR	AT1G19080_ID5	AT1G19080_JC5	WT_24h	WT_3h
AT1G19080	This gene is predicted to encode a PSF3 component of the GINS complex. This complex has been implicated in the initiation of DNA replication in Xenopus. Mutations in this gene cause defects in embryo development.	PSF3,TTN10	A5	AT1G19080_ID4	AT1G19080_JS8	WT_24h	WT_3h
AT1G19080	This gene is predicted to encode a PSF3 component of the GINS complex. This complex has been implicated in the initiation of DNA replication in Xenopus. Mutations in this gene cause defects in embryo development.	PSF3,TTN10	A5	AT1G19080_ID5	AT1G19080_JS8	WT_24h	WT_3h
AT1G19080	This gene is predicted to encode a PSF3 component of the GINS complex. This complex has been implicated in the initiation of DNA replication in Xenopus. Mutations in this gene cause defects in embryo development.	PSF3,TTN10	ES	AT1G19080_JS6	AT1G19080_JS8	WT_24h	WT_3h
AT1G19080	This gene is predicted to encode a PSF3 component of the GINS complex. This complex has been implicated in the initiation of DNA replication in Xenopus. Mutations in this gene cause defects in embryo development.	PSF3,TTN10	ES	AT1G19080_ID4	AT1G19080_JS8	WT_24h	WT_3h
AT1G19080	This gene is predicted to encode a PSF3 component of the GINS complex. This complex has been implicated in the initiation of DNA replication in Xenopus. Mutations in this gene cause defects in embryo development.	PSF3,TTN10	IR	AT1G19080_JS6	AT1G19080_JS8	WT_24h	WT_3h
AT1G19080	This gene is predicted to encode a PSF3 component of the GINS complex. This complex has been implicated in the initiation of DNA replication in Xenopus. Mutations in this gene cause defects in embryo development.	PSF3,TTN10	IR	AT1G19080_ID5	AT1G19080_JS8	WT_24h	WT_3h
AT1G19080	This gene is predicted to encode a PSF3 component of the GINS complex. This complex has been implicated in the initiation of DNA replication in Xenopus. Mutations in this gene cause defects in embryo development.	PSF3,TTN10	IR	AT1G19080_ID4	AT1G19080_JS8	WT_24h	WT_3h
AT1G19100	Encodes a member of the conserved Microrchidia (MORC) adenosine triphosphatase (ATPase) family, predicted to catalyze alterations in chromosome superstructure. Required for heterochromatin condensation and gene silencing.	AtMORC6,DMS11,MORC6	A3	AT1G19100_P1	AT1G19100_JS3	WT_24h	WT_3h
AT1G19100	Encodes a member of the conserved Microrchidia (MORC) adenosine triphosphatase (ATPase) family, predicted to catalyze alterations in chromosome superstructure. Required for heterochromatin condensation and gene silencing.	AtMORC6,DMS11,MORC6	A5	AT1G19100_P1	AT1G19100_JS3	WT_24h	WT_3h
AT1G19350	Encodes brassinosteroid (BR) signalling protein that accumulates in the nucleus as dephosphorylated form in response to BRs. Is phosphorylated by the BIN2 GSK3 kinase. It synergistically interacts with BIM1 to bind to E box sequences (CANNTG). The protein contains a nuclear localization signal (NLS), followed by a highly conserved amino-terminal domain (N) shared by all family members, a BIN2 pho…	BES1,BZR2	A5	AT1G19350_ID4	AT1G19350_ID2	WT_24h	WT_3h
AT1G19350	Encodes brassinosteroid (BR) signalling protein that accumulates in the nucleus as dephosphorylated form in response to BRs. Is phosphorylated by the BIN2 GSK3 kinase. It synergistically interacts with BIM1 to bind to E box sequences (CANNTG). The protein contains a nuclear localization signal (NLS), followed by a highly conserved amino-terminal domain (N) shared by all family members, a BIN2 pho…	BES1,BZR2	IR	AT1G19350_ID4	AT1G19350_ID2	WT_24h	WT_3h
AT1G20020	Encodes a leaf-type ferredoxin:NADP(H) oxidoreductase. It is present in both chloroplast stroma and thylakoid membranes but is more abundant in the stroma The mRNA is cell-to-cell mobile.	ATLFNR2,FNR2,LFNR2	IR	AT1G20020_P2	AT1G20020_P1	WT_24h	WT_3h
AT1G20580	Small nuclear ribonucleoprotein family protein;(source:Araport11)	NA	A3	AT1G20580_P1	AT1G20580_ID1	WT_24h	WT_3h
AT1G20810	FKBP-like peptidyl-prolyl cis-trans isomerase family protein;(source:Araport11)	NA	A5	AT1G20810_s1	AT1G20810.1	WT_24h	WT_3h
AT1G20830	Encodes MCD1 (MULTIPLE CHLOROPLAST DIVISION SITE 1). Determines the site of chloroplast division in concert with MinD (AT5G24020).	MCD1	A3	AT1G20830_c1	AT1G20830_ID4	WT_24h	WT_3h
AT1G20830	Encodes MCD1 (MULTIPLE CHLOROPLAST DIVISION SITE 1). Determines the site of chloroplast division in concert with MinD (AT5G24020).	MCD1	A5	AT1G20830_c1	AT1G20830_ID4	WT_24h	WT_3h
AT1G21630	TPLATE Adaptor complex subunit.	AtEH2	A3	AT1G21630_P1	AT1G21630_s1	WT_24h	WT_3h
AT1G21840	Encodes a urease accessory protein which is essential for the activation of plant urease.	UREF	IR	AT1G21840_JC5	AT1G21840_JS1	WT_24h	WT_3h
AT1G21840	Encodes a urease accessory protein which is essential for the activation of plant urease.	UREF	IR	AT1G21840_P1	AT1G21840_JS1	WT_24h	WT_3h
AT1G21840	Encodes a urease accessory protein which is essential for the activation of plant urease.	UREF	IR	AT1G21840_JC5	AT1G21840_P2	WT_24h	WT_3h
AT1G22200	Endoplasmic reticulum vesicle transporter protein;(source:Araport11)	NA	A3	AT1G22200_P1	AT1G22200_ID21	WT_24h	WT_3h
AT1G22200	Endoplasmic reticulum vesicle transporter protein;(source:Araport11)	NA	A5	AT1G22200_P1	AT1G22200_ID21	WT_24h	WT_3h
AT1G22250	hypothetical protein;(source:Araport11)	NA	IR	AT1G22250_ID2	AT1G22250.1	WT_24h	WT_3h
AT1G22300	Encodes a 14-3-3 protein. This protein is reported to interact with the BZR1 transcription factor involved in brassinosteroid signaling and may affect the nucleocytoplasmic shuttling of BZR1. Might act as a stabilization factor to mediate the oligomerization of REM on the plasma membrane.	14-3-3EPSILON,GF14_EPSILON,GRF10	IR	AT1G22300.3	AT1G22300_P1	WT_24h	WT_3h
AT1G22450	subunit 6b of cytochrome c oxidase	ATCOX6B2,COX6B	IR	AT1G22450.1	AT1G22450_ID1	WT_24h	WT_3h
AT1G22650	Plant neutral invertase family protein;(source:Araport11)	A/N-InvD	IR	AT1G22650_c1	AT1G22650_P2	WT_24h	WT_3h
AT1G22960	Pentatricopeptide repeat (PPR) superfamily protein;(source:Araport11)	NA	A3	AT1G22960.1	AT1G22960_c1	WT_24h	WT_3h
AT1G22960	Pentatricopeptide repeat (PPR) superfamily protein;(source:Araport11)	NA	IR	AT1G22960.1	AT1G22960_c1	WT_24h	WT_3h
AT1G24190	Enhances AtERF7-mediated transcriptional repression. RNAi lines show ABA hypersensitivity. Interacts with ERF7 and HDA19.	ATSIN3,SIN3,SNL3	IR	AT1G24190_P2	AT1G24190_ID2	WT_24h	WT_3h
AT1G24460	Encodes a novel protein that co-immunoprecipitates with SYP41. It is involved in vacuolar trafficking and salt tolerance, potentially via a role in vesicle fusion and in maintaining TGN structure or identity. Mutants display delayed formation of the Brefeldin A (BFA) compartment in cotyledons upon application of BFA.	TNO1	A5	AT1G24460_c1	AT1G24460_P2	WT_24h	WT_3h
AT1G26110	Encodes Decapping 5, required for mRNA decapping, P-body formation and translational repression during postembryonic development.	DCP5	A3	AT1G26110_P1	AT1G26110_ID1	WT_24h	WT_3h
AT1G26110	Encodes Decapping 5, required for mRNA decapping, P-body formation and translational repression during postembryonic development.	DCP5	A5	AT1G26110_P1	AT1G26110_ID1	WT_24h	WT_3h
AT1G26110	Encodes Decapping 5, required for mRNA decapping, P-body formation and translational repression during postembryonic development.	DCP5	ES	AT1G26110_P1	AT1G26110_ID1	WT_24h	WT_3h
AT1G26810	Encodes a protein with &	GALT1	IR	AT1G26810_P1	AT1G26810_ID2	WT_24h	WT_3h
AT1G27210	ARM repeat superfamily protein;(source:Araport11)	NA	A3	AT1G27210_P1	AT1G27210_c1	WT_24h	WT_3h
AT1G27210	ARM repeat superfamily protein;(source:Araport11)	NA	A5	AT1G27210_P1	AT1G27210_c1	WT_24h	WT_3h
AT1G27300	transmembrane protein;(source:Araport11)	NA	IR	AT1G27300.1	AT1G27300_ID1	WT_24h	WT_3h
AT1G27970	Encodes an ortholog of yeast NTF2, a nuclear envelop transport protein that functions as the nuclear import receptor for RanGDP, an essential player in nucleocytoplasmic transport. The mRNA is cell-to-cell mobile.	NTF2B	IR	AT1G27970_P1	AT1G27970.2	WT_24h	WT_3h
AT1G28060	Pre-mRNA-splicing factor 3;(source:Araport11)	RDM16	IR	AT1G28060.1	AT1G28060_JC1	WT_24h	WT_3h
AT1G28210	DnaJ homolog AtJ1 (atj)	AtDjB1,ATJ1	A3	AT1G28210_JS2	AT1G28210_JS1	WT_24h	WT_3h
AT1G28210	DnaJ homolog AtJ1 (atj)	AtDjB1,ATJ1	IR	AT1G28210_JS2	AT1G28210_JS1	WT_24h	WT_3h
AT1G28210	DnaJ homolog AtJ1 (atj)	AtDjB1,ATJ1	A3	AT1G28210_JS2	AT1G28210_JS3	WT_24h	WT_3h
AT1G28210	DnaJ homolog AtJ1 (atj)	AtDjB1,ATJ1	IR	AT1G28210_JS2	AT1G28210_JS3	WT_24h	WT_3h
AT1G28210	DnaJ homolog AtJ1 (atj)	AtDjB1,ATJ1	IR	AT1G28210_JS2	AT1G28210_P2	WT_24h	WT_3h
AT1G28290	Encodes an atypical arabinogalactan protein that is localized to the plasma membrange. AGP31 is highly expressed in flowers and vascular tissue and is repressed by jasmonic acid. AGP31 may play a role in vascular tissue function during defense and development.	AGP31	IR	AT1G28290_P1	AT1G28290_P2	WT_24h	WT_3h
AT1G29120	Hydrolase-like protein family;(source:Araport11)	UP9	A3	AT1G29120_s3	AT1G29120_JC5	WT_24h	WT_3h
AT1G29120	Hydrolase-like protein family;(source:Araport11)	UP9	IR	AT1G29120_s3	AT1G29120_JC5	WT_24h	WT_3h
AT1G29750	Receptor-like serine/threonine kinase (RKF1). The putative extracellular domain of the RKF1 protein contains 13 tandem repeats of leucine-rich sequences. Expressed in early flower primordial, stamen, and pollen grains.	RKF1	A3	AT1G29750_P2	AT1G29750_JC12	WT_24h	WT_3h
AT1G30040	Encodes a gibberellin 2-oxidase that acts on C-19 gibberellins. AtGA2OX2 expression is responsive to cytokinin and KNOX activities.	ATGA2OX2,GA2OX2,GA2OX2	IR	AT1G30040_P2	AT1G30040_P1	WT_24h	WT_3h
AT1G30520	Encodes a chloroplast O-succinylbenzoyl-CoA ligase. Involved in phylloquinone biosynthesis. Knock mutant is seedling lethal.	AAE14	A3	AT1G30520_P1	AT1G30520_s2	WT_24h	WT_3h
AT1G30520	Encodes a chloroplast O-succinylbenzoyl-CoA ligase. Involved in phylloquinone biosynthesis. Knock mutant is seedling lethal.	AAE14	IR	AT1G30520_P1	AT1G30520_s2	WT_24h	WT_3h
AT1G30590	RNA polymerase I specific transcription initiation factor RRN3 protein;(source:Araport11)	NA	IR	AT1G30590_JS15	AT1G30590_ID8	WT_24h	WT_3h
AT1G30590	RNA polymerase I specific transcription initiation factor RRN3 protein;(source:Araport11)	NA	A3	AT1G30590_JS15	AT1G30590_JS11	WT_24h	WT_3h
AT1G30690	Sec14p-like phosphatidylinositol transfer family protein;(source:Araport11)	PATL4	A5	AT1G30690_P2	AT1G30690_P1	WT_24h	WT_3h
AT1G31440	SH3 domain-containing protein;(source:Araport11)	SH3P1	A3	AT1G31440_P1	AT1G31440_c1	WT_24h	WT_3h
AT1G31440	SH3 domain-containing protein;(source:Araport11)	SH3P1	A5	AT1G31440_P1	AT1G31440_c1	WT_24h	WT_3h
AT1G31500	HESP identified based on similarity to nocturnins and presence circadian regulatory elements in the promoter. It functions as a Mg(II) dependent poly(A) exoribonuclease.It is under circadian regulation and expressed at night. Knockdowns affect the regulation of circadian genes CCA1 and TOC1.	HESP	A3	AT1G31500_ID11	AT1G31500_P4	WT_24h	WT_3h
AT1G31500	HESP identified based on similarity to nocturnins and presence circadian regulatory elements in the promoter. It functions as a Mg(II) dependent poly(A) exoribonuclease.It is under circadian regulation and expressed at night. Knockdowns affect the regulation of circadian genes CCA1 and TOC1.	HESP	IR	AT1G31500_ID11	AT1G31500_P4	WT_24h	WT_3h
AT1G31500	HESP identified based on similarity to nocturnins and presence circadian regulatory elements in the promoter. It functions as a Mg(II) dependent poly(A) exoribonuclease.It is under circadian regulation and expressed at night. Knockdowns affect the regulation of circadian genes CCA1 and TOC1.	HESP	A3	AT1G31500_ID11	AT1G31500_P5	WT_24h	WT_3h
AT1G32160	beta-casein (DUF760);(source:Araport11)	NA	IR	AT1G32160_ID2	AT1G32160_P1	WT_24h	WT_3h
AT1G32400	TOM2A encodes a 280 amino acid putative four-pass transmembrane protein with a C-terminal farnesylation signal, essential for efficient multiplication of tobacco mosaic viruses.	TOM2A	A3	AT1G32400_P1	AT1G32400_ID4	WT_24h	WT_3h
AT1G33060	NAC 014;(source:Araport11)	ANAC014,NAC014	A3	AT1G33060_P2	AT1G33060_P1	WT_24h	WT_3h
AT1G33490	E3 ubiquitin-protein ligase;(source:Araport11)	NA	IR	AT1G33490_c1	AT1G33490_P1	WT_24h	WT_3h
AT1G34430	2-oxoacid dehydrogenases acyltransferase family protein;(source:Araport11)	EMB3003	A3	AT1G34430_ID62	AT1G34430_ID99	WT_24h	WT_3h
AT1G34430	2-oxoacid dehydrogenases acyltransferase family protein;(source:Araport11)	EMB3003	A5	AT1G34430.1	AT1G34430_ID99	WT_24h	WT_3h
AT1G34430	2-oxoacid dehydrogenases acyltransferase family protein;(source:Araport11)	EMB3003	A5	AT1G34430_ID62	AT1G34430_ID99	WT_24h	WT_3h
AT1G34430	2-oxoacid dehydrogenases acyltransferase family protein;(source:Araport11)	EMB3003	IR	AT1G34430.1	AT1G34430_ID99	WT_24h	WT_3h
AT1G34430	2-oxoacid dehydrogenases acyltransferase family protein;(source:Araport11)	EMB3003	MES	AT1G34430_ID62	AT1G34430_ID99	WT_24h	WT_3h
AT1G34430	2-oxoacid dehydrogenases acyltransferase family protein;(source:Araport11)	EMB3003	MES	AT1G34430.1	AT1G34430_ID99	WT_24h	WT_3h
AT1G34550	transmembrane protein (DUF616);(source:Araport11)	EMB2756	IR	AT1G34550.1	AT1G34550_P2	WT_24h	WT_3h
AT1G34570	Essential protein Yae1, N-terminal;(source:Araport11)	NA	A5	AT1G34570_P1	AT1G34570_ID6	WT_24h	WT_3h
AT1G34570	Essential protein Yae1, N-terminal;(source:Araport11)	NA	IR	AT1G34570_P1	AT1G34570_ID6	WT_24h	WT_3h
AT1G34570	Essential protein Yae1, N-terminal;(source:Araport11)	NA	A5	AT1G34570_P1	AT1G34570_JS2	WT_24h	WT_3h
AT1G35340	ATP-dependent protease La (LON) domain protein;(source:Araport11)	NA	A3	AT1G35340_P3	AT1G35340_P1	WT_24h	WT_3h
AT1G35340	ATP-dependent protease La (LON) domain protein;(source:Araport11)	NA	IR	AT1G35340_P3	AT1G35340_P1	WT_24h	WT_3h
AT1G35340	ATP-dependent protease La (LON) domain protein;(source:Araport11)	NA	IR	AT1G35340_P6	AT1G35340_P1	WT_24h	WT_3h
AT1G35530	Encodes FANCM, a highly conserved helicase that functions as a major factor limiting meiotic crossover formation. It is not directly involved in the repair of DNA lesions but suppresses spontaneous somatic homologous recombination via a RecQ helicase (At-RECQ4A)-independent pathway.	At-FANCM,FANCM	A3	AT1G35530_P3	AT1G35530_P5	WT_24h	WT_3h
AT1G35530	Encodes FANCM, a highly conserved helicase that functions as a major factor limiting meiotic crossover formation. It is not directly involved in the repair of DNA lesions but suppresses spontaneous somatic homologous recombination via a RecQ helicase (At-RECQ4A)-independent pathway.	At-FANCM,FANCM	A5	AT1G35530_P3	AT1G35530_P5	WT_24h	WT_3h
AT1G35530	Encodes FANCM, a highly conserved helicase that functions as a major factor limiting meiotic crossover formation. It is not directly involved in the repair of DNA lesions but suppresses spontaneous somatic homologous recombination via a RecQ helicase (At-RECQ4A)-independent pathway.	At-FANCM,FANCM	ES	AT1G35530_P3	AT1G35530_P5	WT_24h	WT_3h
AT1G35530	Encodes FANCM, a highly conserved helicase that functions as a major factor limiting meiotic crossover formation. It is not directly involved in the repair of DNA lesions but suppresses spontaneous somatic homologous recombination via a RecQ helicase (At-RECQ4A)-independent pathway.	At-FANCM,FANCM	IR	AT1G35530_P3	AT1G35530_P5	WT_24h	WT_3h
AT1G37130	Identified as a mutant resistant to chlorate. Encodes nitrate reductase structural gene. Involved in nitrate assimilation. Has nitrate reductase activity. Up-regulated by the fungus P. indica. Binds transcription factor At2g35940. The mRNA is cell-to-cell mobile.	ATNR2,B29,CHL3,NIA2,NIA2-1,NR,NR2	IR	AT1G37130_P1	AT1G37130_c3	WT_24h	WT_3h
AT1G43170	Encodes a cytoplasmic ribosomal protein. The mRNA is cell-to-cell mobile.	ARP1,emb2207,RP1,RPL3A	A3	AT1G43170_P1	AT1G43170.4	WT_24h	WT_3h
AT1G43170	Encodes a cytoplasmic ribosomal protein. The mRNA is cell-to-cell mobile.	ARP1,emb2207,RP1,RPL3A	MES	AT1G43170_P1	AT1G43170.4	WT_24h	WT_3h
AT1G43670	Encodes a fructose-1,6-bisphosphatase. This enzyme, in addition to catalyzing the formation of fructose-6-phosphate for sucrose biosynthesis, appears to play a role in fructose-mediated signaling that is independent of its enzymatic activity. atcfbp-1/fins1 mutants have reduced photosynthetic rates, elevated levels of starch and reduced levels of sucrose during the day. Although the protein is ex…	AtcFBP,cyfbp,FBP,FINS1	A3	AT1G43670_P1	AT1G43670_ID19	WT_24h	WT_3h
AT1G43670	Encodes a fructose-1,6-bisphosphatase. This enzyme, in addition to catalyzing the formation of fructose-6-phosphate for sucrose biosynthesis, appears to play a role in fructose-mediated signaling that is independent of its enzymatic activity. atcfbp-1/fins1 mutants have reduced photosynthetic rates, elevated levels of starch and reduced levels of sucrose during the day. Although the protein is ex…	AtcFBP,cyfbp,FBP,FINS1	A5	AT1G43670_P1	AT1G43670_ID19	WT_24h	WT_3h
AT1G43670	Encodes a fructose-1,6-bisphosphatase. This enzyme, in addition to catalyzing the formation of fructose-6-phosphate for sucrose biosynthesis, appears to play a role in fructose-mediated signaling that is independent of its enzymatic activity. atcfbp-1/fins1 mutants have reduced photosynthetic rates, elevated levels of starch and reduced levels of sucrose during the day. Although the protein is ex…	AtcFBP,cyfbp,FBP,FINS1	MES	AT1G43670_P1	AT1G43670_ID19	WT_24h	WT_3h
AT1G45474	Encodes a component of the light harvesting complex of photosystem I.	Lhca5	IR	AT1G45474_P1	AT1G45474_P2	WT_24h	WT_3h
AT1G47056	Encodes an F-box protein. Based on genetic analysis appears to be functionally redundant with VFB2,3, and 4. When expression of all 4 genes is reduced plants show defects in growth and reduced expression of auxin response genes.	VFB1	IR	AT1G47056_P1	AT1G47056_c1	WT_24h	WT_3h
AT1G47128	Cysteine proteinase precursor-like protein/ dehydration stress-responsive gene (RD21). Has been shown to have peptide ligase activity and protease activity in vitro. RD21 is involved in immunity to the necrotrophic fungal pathogen Botrytis cinerea.Activity detected in root, leaf, flower and cell culture.	RD21,RD21A	A3	AT1G47128_P1	AT1G47128_ID8	WT_24h	WT_3h
AT1G47128	Cysteine proteinase precursor-like protein/ dehydration stress-responsive gene (RD21). Has been shown to have peptide ligase activity and protease activity in vitro. RD21 is involved in immunity to the necrotrophic fungal pathogen Botrytis cinerea.Activity detected in root, leaf, flower and cell culture.	RD21,RD21A	A5	AT1G47128_P1	AT1G47128_ID8	WT_24h	WT_3h
AT1G47128	Cysteine proteinase precursor-like protein/ dehydration stress-responsive gene (RD21). Has been shown to have peptide ligase activity and protease activity in vitro. RD21 is involved in immunity to the necrotrophic fungal pathogen Botrytis cinerea.Activity detected in root, leaf, flower and cell culture.	RD21,RD21A	IR	AT1G47128_P1	AT1G47128_ID8	WT_24h	WT_3h
AT1G47128	Cysteine proteinase precursor-like protein/ dehydration stress-responsive gene (RD21). Has been shown to have peptide ligase activity and protease activity in vitro. RD21 is involved in immunity to the necrotrophic fungal pathogen Botrytis cinerea.Activity detected in root, leaf, flower and cell culture.	RD21,RD21A	MES	AT1G47128_P1	AT1G47128_ID8	WT_24h	WT_3h
AT1G47565	transposable_element_gene;(source:Araport11);retrotransposon gag protein, contains Pfam:PF03732 Retrotransposon gag protein;(source:TAIR10)	NA	IR	AT1G47565.1	AT1G47565_JS1	WT_24h	WT_3h
AT1G49980	DNA/RNA polymerases superfamily protein;(source:Araport11)	NA	A5	AT1G49980_P5	AT1G49980_P4	WT_24h	WT_3h
AT1G49980	DNA/RNA polymerases superfamily protein;(source:Araport11)	NA	IR	AT1G49980_P5	AT1G49980_P4	WT_24h	WT_3h
AT1G49980	DNA/RNA polymerases superfamily protein;(source:Araport11)	NA	A5	AT1G49980_P5	AT1G49980_P6	WT_24h	WT_3h
AT1G49980	DNA/RNA polymerases superfamily protein;(source:Araport11)	NA	IR	AT1G49980_P5	AT1G49980_P6	WT_24h	WT_3h
AT1G50140	P-loop containing nucleoside triphosphate hydrolases superfamily protein;(source:Araport11)	NA	IR	AT1G50140_c3	AT1G50140_s4	WT_24h	WT_3h
AT1G50140	P-loop containing nucleoside triphosphate hydrolases superfamily protein;(source:Araport11)	NA	A5	AT1G50140_c3	AT1G50140_s6	WT_24h	WT_3h
AT1G50140	P-loop containing nucleoside triphosphate hydrolases superfamily protein;(source:Araport11)	NA	ES	AT1G50140_c3	AT1G50140_s6	WT_24h	WT_3h
AT1G50140	P-loop containing nucleoside triphosphate hydrolases superfamily protein;(source:Araport11)	NA	IR	AT1G50140_c3	AT1G50140_s6	WT_24h	WT_3h
AT1G51110	localized to chloroplasts	NA	A3	AT1G51110_s1	AT1G51110_P1	WT_24h	WT_3h
AT1G51745	Tudor/PWWP/MBT superfamily protein;(source:Araport11)	PWWP2,SL1	IR	AT1G51745_P1	AT1G51745.1	WT_24h	WT_3h
AT1G52320	kinesin-like protein;(source:Araport11)	NA	A3	AT1G52320.2	AT1G52320_P4	WT_24h	WT_3h
AT1G52360	Coatomer, beta subunit;(source:Araport11)	NA	A5	AT1G52360_P1	AT1G52360_P3	WT_24h	WT_3h
AT1G53760	K+-H+ exchange-like protein;(source:Araport11)	NA	A3	AT1G53760_P1	AT1G53760.2	WT_24h	WT_3h
AT1G54180	Belongs to five-member BRX gene family. Arabidopsis BRX genes share high levels of similarity among each others, with several conserved domains. The most distinct is BRX domain - highly conserved in all BRX genes among distantly related species. This protein-protein interaction domain is required and sufficient for BRX activity.	ATBRXL3,BRX-LIKE3	ES	AT1G54180_ID2	AT1G54180_P2	WT_24h	WT_3h
AT1G54180	Belongs to five-member BRX gene family. Arabidopsis BRX genes share high levels of similarity among each others, with several conserved domains. The most distinct is BRX domain - highly conserved in all BRX genes among distantly related species. This protein-protein interaction domain is required and sufficient for BRX activity.	ATBRXL3,BRX-LIKE3	IR	AT1G54180_ID2	AT1G54180_P2	WT_24h	WT_3h
AT1G54220	Encodes a subunit of the mitochondrial pyruvate dehydrogenase complex.	mtE2-3	A3	AT1G54220_c1	AT1G54220_P1	WT_24h	WT_3h
AT1G54380	Encodes GEMIN2, a spliceosomal small nuclear ribonucleoprotein assembly factor conserved from yeast to humans. GEMIN2 is a key component of a posttranscriptional regulatory mechanism that ensures the appropriate acclimation of plants to daily and seasonal changes in temperature conditions. It controls the alternative splicing of several circadian clock genes and attenuates the effects of temperat…	GEMIN2	A3	AT1G54380_P1	AT1G54380_c3	WT_24h	WT_3h
AT1G54385	At1G54385 encodes the plant KASH protein SINE1; SINE1 interacts with SUN1 and SUN2, is colocalized with F-actin, and is localized at the nuclear envelope.	SINE1	IR	AT1G54385_P3	AT1G54385_P1	WT_24h	WT_3h
AT1G54440	Rrp6-like protein, controls RNA-directed DNA methylation by helping with the retention of noncoding RNAs in normal cells.	AAtrimmer1,AtRRP6L1,RRP6L1	A3	AT1G54440_s2	AT1G54440_JS3	WT_24h	WT_3h
AT1G54440	Rrp6-like protein, controls RNA-directed DNA methylation by helping with the retention of noncoding RNAs in normal cells.	AAtrimmer1,AtRRP6L1,RRP6L1	A5	AT1G54440_s2	AT1G54440_JS3	WT_24h	WT_3h
AT1G54440	Rrp6-like protein, controls RNA-directed DNA methylation by helping with the retention of noncoding RNAs in normal cells.	AAtrimmer1,AtRRP6L1,RRP6L1	IR	AT1G54440_s2	AT1G54440_JS3	WT_24h	WT_3h
AT1G54440	Rrp6-like protein, controls RNA-directed DNA methylation by helping with the retention of noncoding RNAs in normal cells.	AAtrimmer1,AtRRP6L1,RRP6L1	A3	AT1G54440_s2	AT1G54440_P1	WT_24h	WT_3h
AT1G54440	Rrp6-like protein, controls RNA-directed DNA methylation by helping with the retention of noncoding RNAs in normal cells.	AAtrimmer1,AtRRP6L1,RRP6L1	IR	AT1G54440_s2	AT1G54440_P1	WT_24h	WT_3h
AT1G55810	One of the homologous genes predicted to encode proteins with UPRT domains (Uracil phosphoribosyltransferase). Five of these genes (At5g40870, At3g27190, At1g55810, At4g26510 and At3g27440) show a high level of identity, and are annotated as also containing a N-terminal uracil kinase (UK) domain. These genes are referred to as UKL1 (UK-like 1), UKL2, UKL3, UKL4 and UKL5, respectively.	UKL3	A5	AT1G55810_P1	AT1G55810_P3	WT_24h	WT_3h
AT1G56500	Encodes a thylakoid membrane protein with thioredoxin-like and beta-propeller domains located in the lumen and a haloacid-dehalogenase domain exposed to the chloroplast stroma. The protein's role may be to prevent formation of a slowly reversible form of antenna quenching, thereby maintaining the efficiency of light harvesting. The mRNA is cell-to-cell mobile.	SOQ1	IR	AT1G56500_P3	AT1G56500_P1	WT_24h	WT_3h
AT1G57770	FAD/NAD(P)-binding oxidoreductase family protein;(source:Araport11)	NA	IR	AT1G57770_ID6	AT1G57770_P1	WT_24h	WT_3h
AT1G58807	Disease resistance protein (CC-NBS-LRR class) family;(source:Araport11)	NA	A5	AT1G58807_P1	AT1G58807_JC5	WT_24h	WT_3h
AT1G58807	Disease resistance protein (CC-NBS-LRR class) family;(source:Araport11)	NA	IR	AT1G58807_P1	AT1G58807_JC5	WT_24h	WT_3h
AT1G59218	Similar to disease resistance proteins.	NA	A3	AT1G59218_P1	AT1G59218_s2	WT_24h	WT_3h
AT1G59218	Similar to disease resistance proteins.	NA	IR	AT1G59218_P1	AT1G59218_s2	WT_24h	WT_3h
AT1G59870	ATP binding cassette transporter. Localized to the plasma membrane in uninfected cells. In infected leaves, the protein concentrated at infection sites. Contributes to nonhost resistance to inappropriate pathogens that enter by direct penetration in a salicylic acid?dependent manner. Required for mlo resistance. Has Cd transporter activity (Cd2+ extrusion pump) and contributes to heavy metal resi…	ABCG36,ATABCG36,ATPDR8,PDR8,PEN3	A3	AT1G59870_P1	AT1G59870_ID5	WT_24h	WT_3h
AT1G59870	ATP binding cassette transporter. Localized to the plasma membrane in uninfected cells. In infected leaves, the protein concentrated at infection sites. Contributes to nonhost resistance to inappropriate pathogens that enter by direct penetration in a salicylic acid?dependent manner. Required for mlo resistance. Has Cd transporter activity (Cd2+ extrusion pump) and contributes to heavy metal resi…	ABCG36,ATABCG36,ATPDR8,PDR8,PEN3	A5	AT1G59870_P1	AT1G59870_ID5	WT_24h	WT_3h
AT1G60060	Serine/threonine-protein kinase WNK (With No Lysine)-like protein;(source:Araport11)	NA	IR	AT1G60060_ID2	AT1G60060_P1	WT_24h	WT_3h
AT1G60140	Encodes an enzyme putatively involved in trehalose biosynthesis. The protein has a trehalose synthase (TPS)-like domain that may or may not be active as well as a trehalose phosphatase (TPP)-like domain.	ATTPS10,TPS10,TPS10	IR	AT1G60140_P1	AT1G60140_P3	WT_24h	WT_3h
AT1G60270	beta glucosidase 6;(source:Araport11)	BGLU6	IR	AT1G60270_P2	AT1G60270_ID23	WT_24h	WT_3h
AT1G60270	beta glucosidase 6;(source:Araport11)	BGLU6	A3	AT1G60270_P2	AT1G60270_s4	WT_24h	WT_3h
AT1G60270	beta glucosidase 6;(source:Araport11)	BGLU6	IR	AT1G60270_P2	AT1G60270_s4	WT_24h	WT_3h
AT1G60490	Encodes a phosphatidylinositol 3-kinase that is expressed in most plant tissues. Defects in VPS34 affect a number of cellular processes. Loss of function mutations are not transmitted through the male gametophyte due to defects in microgametogenesis therefore it is difficult to assess the effects of loss of VPS34 function in the whole plant. Involved in salt-stress responses.	ATVPS34,PI3K,VPS34	IR	AT1G60490_P1	AT1G60490_ID2	WT_24h	WT_3h
AT1G61140	SNF2 domain-containing protein / helicase domain-containing protein / zinc finger protein-like protein;(source:Araport11)	EDA16,FRG4	IR	AT1G61140_P1	AT1G61140_s1	WT_24h	WT_3h
AT1G61170	hypothetical protein;(source:Araport11)	NA	IR	AT1G61170_P1	AT1G61170_ID1	WT_24h	WT_3h
AT1G61250	Encodes a putative secretory carrier membrane protein (SC3). The mRNA is cell-to-cell mobile.	AtSCAMP1,SC3,SCAMP1	A3	AT1G61250_P1	AT1G61250.2	WT_24h	WT_3h
AT1G61250	Encodes a putative secretory carrier membrane protein (SC3). The mRNA is cell-to-cell mobile.	AtSCAMP1,SC3,SCAMP1	A5	AT1G61250_P1	AT1G61250.2	WT_24h	WT_3h
AT1G61520	PSI type III chlorophyll a/b-binding protein (Lhca3*1) The mRNA is cell-to-cell mobile.	LHCA3	IR	AT1G61520_P1	AT1G61520.3	WT_24h	WT_3h
AT1G61790	Encodes the OST3/6 subunit of the hetero-oligomeric plant oligosaccharyltransferase complex (OST). Also identified by GWAS as having a role in interspecific pollen tube recognition.	ARTUMES,OST3/6	IR	AT1G61790_P1	AT1G61790_P2	WT_24h	WT_3h
AT1G62600	Flavin-binding monooxygenase family protein;(source:Araport11)	NA	IR	AT1G62600_P1	AT1G62600_ID11	WT_24h	WT_3h
AT1G62610	NAD(P)-binding Rossmann-fold superfamily protein;(source:Araport11)	NA	A3	AT1G62610_ID3	AT1G62610.2	WT_24h	WT_3h
AT1G62680	Pentatricopeptide repeat (PPR) superfamily protein;(source:Araport11)	NA	IR	AT1G62680_P2	AT1G62680_c1	WT_24h	WT_3h
AT1G62680	Pentatricopeptide repeat (PPR) superfamily protein;(source:Araport11)	NA	IR	AT1G62680_P2	AT1G62680_P1	WT_24h	WT_3h
AT1G62960	Encodes an aminotransferase with broad specificity for aspartate and aromatic amino aids such as tyrosine and phenylalanine. It does not act on branched chain amino acids and does not have ACC synthase activity.	ACS10	A3	AT1G62960_P1	AT1G62960_c1	WT_24h	WT_3h
AT1G63660	GMP synthase (glutamine-hydrolyzing), putative / glutamine amidotransferase;(source:Araport11)	NA	A3	AT1G63660_P1	AT1G63660_ID1	WT_24h	WT_3h
AT1G63660	GMP synthase (glutamine-hydrolyzing), putative / glutamine amidotransferase;(source:Araport11)	NA	A5	AT1G63660_P1	AT1G63660_ID1	WT_24h	WT_3h
AT1G63660	GMP synthase (glutamine-hydrolyzing), putative / glutamine amidotransferase;(source:Araport11)	NA	MES	AT1G63660_P1	AT1G63660_ID1	WT_24h	WT_3h
AT1G63670	hypothetical protein (DUF3741);(source:Araport11)	TRM12	IR	AT1G63670_P3	AT1G63670_JC3	WT_24h	WT_3h
AT1G64060	Interacts with AtrbohD gene to fine tune the spatial control of ROI production and hypersensitive response to cell in and around infection site.	ATRBOH_F,ATRBOHF,RBOH_F,RBOHAP108,RBOHF	A5	AT1G64060_P1	AT1G64060_s1	WT_24h	WT_3h
AT1G64090	Reticulan like protein B3;(source:Araport11)	RTN3,RTNLB3	IR	AT1G64090_P1	AT1G64090_c1	WT_24h	WT_3h
AT1G64530	Plant regulator RWP-RK family protein;(source:Araport11)	NLP6	IR	AT1G64530_P1	AT1G64530_P2	WT_24h	WT_3h
AT1G65720	transmembrane protein;(source:Araport11)	NA	IR	AT1G65720_P1	AT1G65720_JC1	WT_24h	WT_3h
AT1G66980	Encodes SNC4 (suppressor of npr1-1, constitutive 4), an atypical receptor-like kinase with two predicted extracellular glycerophosphoryl diester phosphodiesterase domains.	GDPDL2,SNC4	A5	AT1G66980_P3	AT1G66980_P1	WT_24h	WT_3h
AT1G66980	Encodes SNC4 (suppressor of npr1-1, constitutive 4), an atypical receptor-like kinase with two predicted extracellular glycerophosphoryl diester phosphodiesterase domains.	GDPDL2,SNC4	IR	AT1G66980_P3	AT1G66980_P1	WT_24h	WT_3h
AT1G66980	Encodes SNC4 (suppressor of npr1-1, constitutive 4), an atypical receptor-like kinase with two predicted extracellular glycerophosphoryl diester phosphodiesterase domains.	GDPDL2,SNC4	IR	AT1G66980_P2	AT1G66980_P1	WT_24h	WT_3h
AT1G67195	miRNA (MIR414). Has been identified as a translated small open reading frame by ribosome profiling.	MIR414,sORF16	IR	AT1G67195_ID1	AT1G67195.1	WT_24h	WT_3h
AT1G67710	Encodes an Arabidopsis response regulator (ARR) protein that acts in concert with other type-B ARRs in the cytokinin signaling pathway. Affects ABA-JA crosstalk.	ARR11	A5	AT1G67710_JC21	AT1G67710_P2	WT_24h	WT_3h
AT1G67710	Encodes an Arabidopsis response regulator (ARR) protein that acts in concert with other type-B ARRs in the cytokinin signaling pathway. Affects ABA-JA crosstalk.	ARR11	IR	AT1G67710_P1	AT1G67710_P2	WT_24h	WT_3h
AT1G67710	Encodes an Arabidopsis response regulator (ARR) protein that acts in concert with other type-B ARRs in the cytokinin signaling pathway. Affects ABA-JA crosstalk.	ARR11	IR	AT1G67710_JC21	AT1G67710_P2	WT_24h	WT_3h
AT1G68580	Agenet and bromo-adjacent homology (BAH) domain-containing protein;(source:Araport11)	NA	ES	AT1G68580_P2	AT1G68580_P1	WT_24h	WT_3h
AT1G68580	Agenet and bromo-adjacent homology (BAH) domain-containing protein;(source:Araport11)	NA	IR	AT1G68580_P3	AT1G68580_P1	WT_24h	WT_3h
AT1G68580	Agenet and bromo-adjacent homology (BAH) domain-containing protein;(source:Araport11)	NA	IR	AT1G68580_P2	AT1G68580_P1	WT_24h	WT_3h
AT1G68580	Agenet and bromo-adjacent homology (BAH) domain-containing protein;(source:Araport11)	NA	ES	AT1G68580_P3	AT1G68580_P4	WT_24h	WT_3h
AT1G68580	Agenet and bromo-adjacent homology (BAH) domain-containing protein;(source:Araport11)	NA	IR	AT1G68580_P2	AT1G68580_P4	WT_24h	WT_3h
AT1G68580	Agenet and bromo-adjacent homology (BAH) domain-containing protein;(source:Araport11)	NA	IR	AT1G68580_P3	AT1G68580_P4	WT_24h	WT_3h
AT1G68580	Agenet and bromo-adjacent homology (BAH) domain-containing protein;(source:Araport11)	NA	ES	AT1G68580_P2	AT1G68580_s1	WT_24h	WT_3h
AT1G68580	Agenet and bromo-adjacent homology (BAH) domain-containing protein;(source:Araport11)	NA	IR	AT1G68580_P3	AT1G68580_s1	WT_24h	WT_3h
AT1G68580	Agenet and bromo-adjacent homology (BAH) domain-containing protein;(source:Araport11)	NA	IR	AT1G68580_P2	AT1G68580_s1	WT_24h	WT_3h
AT1G68690	Encodes a member of the proline-rich extensin-like receptor kinase (PERK) family. This family consists of 15 predicted receptor kinases (PMID: 15653807).	AtPERK9,PERK9	IR	AT1G68690_P1	AT1G68690_P4	WT_24h	WT_3h
AT1G69530	Member of Alpha-Expansin Gene Family. Naming convention from the Expansin Working Group (Kende et al, Plant Mol Bio). Involved in the formation of nematode-induced syncytia in roots of Arabidopsis thaliana.	AT-EXP1,ATEXP1,ATEXPA1,ATHEXP_ALPHA_1.2,EXP1,EXPA1	A3	AT1G69530_P2	AT1G69530_P4	WT_24h	WT_3h
AT1G69530	Member of Alpha-Expansin Gene Family. Naming convention from the Expansin Working Group (Kende et al, Plant Mol Bio). Involved in the formation of nematode-induced syncytia in roots of Arabidopsis thaliana.	AT-EXP1,ATEXP1,ATEXPA1,ATHEXP_ALPHA_1.2,EXP1,EXPA1	IR	AT1G69530_P2	AT1G69530_P4	WT_24h	WT_3h
AT1G70620	cyclin-like protein;(source:Araport11)	NA	IR	AT1G70620_P4	AT1G70620_ID10	WT_24h	WT_3h
AT1G70620	cyclin-like protein;(source:Araport11)	NA	A3	AT1G70620_P4	AT1G70620_P7	WT_24h	WT_3h
AT1G70620	cyclin-like protein;(source:Araport11)	NA	IR	AT1G70620_P4	AT1G70620_P8	WT_24h	WT_3h
AT1G70620	cyclin-like protein;(source:Araport11)	NA	IR	AT1G70620_P6	AT1G70620_P8	WT_24h	WT_3h
AT1G71030	Encodes a putative myb family transcription factor. In contrast to most other myb-like proteins its myb domain consists of a single repeat. A proline-rich region potentially involved in transactivation is found in the C-terminal part of the protein. Its transcript accumulates mainly in leaves.	ATMYBL2,MYBL2	IR	AT1G71030_P1	AT1G71030_P2	WT_24h	WT_3h
AT1G71696	Encodes a Putative Zn2+ carboxypeptidase, 4 splice variants have been identified but not characterized for different functions and/or expression patterns.SOL1 isolated as a suppressor of root- specific overexpression of CLE19, a clavata3 like gene. sol1 partially suppresses the short root phenotype caused by CLE19 overexpression.	SOL1	A3	AT1G71696_JS4	AT1G71696_ID9	WT_24h	WT_3h
AT1G71696	Encodes a Putative Zn2+ carboxypeptidase, 4 splice variants have been identified but not characterized for different functions and/or expression patterns.SOL1 isolated as a suppressor of root- specific overexpression of CLE19, a clavata3 like gene. sol1 partially suppresses the short root phenotype caused by CLE19 overexpression.	SOL1	IR	AT1G71696_JS4	AT1G71696_ID9	WT_24h	WT_3h
AT1G71696	Encodes a Putative Zn2+ carboxypeptidase, 4 splice variants have been identified but not characterized for different functions and/or expression patterns.SOL1 isolated as a suppressor of root- specific overexpression of CLE19, a clavata3 like gene. sol1 partially suppresses the short root phenotype caused by CLE19 overexpression.	SOL1	A3	AT1G71696_JS4	AT1G71696_P2	WT_24h	WT_3h
AT1G72150	novel cell-plate-associated protein that is related in sequence to proteins involved in membrane trafficking in other eukaryotes The mRNA is cell-to-cell mobile.	PATL1	A3	AT1G72150_P1	AT1G72150_ID5	WT_24h	WT_3h
AT1G72150	novel cell-plate-associated protein that is related in sequence to proteins involved in membrane trafficking in other eukaryotes The mRNA is cell-to-cell mobile.	PATL1	IR	AT1G72150_P1	AT1G72150_ID5	WT_24h	WT_3h
AT1G72190	D-isomer specific 2-hydroxyacid dehydrogenase family protein;(source:Araport11)	NA	A3	AT1G72190_ID51	AT1G72190_ID21	WT_24h	WT_3h
AT1G72190	D-isomer specific 2-hydroxyacid dehydrogenase family protein;(source:Araport11)	NA	A3	AT1G72190_ID51	AT1G72190_P1	WT_24h	WT_3h
AT1G72370	acidic protein associated to 40S ribosomal subunit of ribosomes. Involved in polysome formation during active protein synthesis. Expressed in actively growing tissue.	AP40,P40,RP40,RPSAA	A3	AT1G72370_P1	AT1G72370_ID6	WT_24h	WT_3h
AT1G72370	acidic protein associated to 40S ribosomal subunit of ribosomes. Involved in polysome formation during active protein synthesis. Expressed in actively growing tissue.	AP40,P40,RP40,RPSAA	MES	AT1G72370_P1	AT1G72370_ID6	WT_24h	WT_3h
AT1G72640	NAD(P)-binding Rossmann-fold superfamily protein;(source:Araport11)	NA	A3	AT1G72640_ID19	AT1G72640_P4	WT_24h	WT_3h
AT1G72640	NAD(P)-binding Rossmann-fold superfamily protein;(source:Araport11)	NA	A3	AT1G72640_ID14	AT1G72640_P4	WT_24h	WT_3h
AT1G72650	Arabidopsis thaliana myb family transcription factor (At1g72650)	TRFL6	A3	AT1G72650_ID32	AT1G72650_P1	WT_24h	WT_3h
AT1G72650	Arabidopsis thaliana myb family transcription factor (At1g72650)	TRFL6	A5	AT1G72650_ID32	AT1G72650_P1	WT_24h	WT_3h
AT1G72650	Arabidopsis thaliana myb family transcription factor (At1g72650)	TRFL6	IR	AT1G72650_ID32	AT1G72650_P1	WT_24h	WT_3h
AT1G72770	mutant has ABA hypersensitive inhibition of seed germination; Protein Phosphatase 2C; regulates the activation of the Snf1-related kinase OST1 by abscisic acid. The mRNA is cell-to-cell mobile.	AtHAB1,HAB1	A3	AT1G72770_ID1	AT1G72770.3	WT_24h	WT_3h
AT1G72770	mutant has ABA hypersensitive inhibition of seed germination; Protein Phosphatase 2C; regulates the activation of the Snf1-related kinase OST1 by abscisic acid. The mRNA is cell-to-cell mobile.	AtHAB1,HAB1	IR	AT1G72770_ID1	AT1G72770.3	WT_24h	WT_3h
AT1G72770	mutant has ABA hypersensitive inhibition of seed germination; Protein Phosphatase 2C; regulates the activation of the Snf1-related kinase OST1 by abscisic acid. The mRNA is cell-to-cell mobile.	AtHAB1,HAB1	IR	AT1G72770_ID1	AT1G72770_P2	WT_24h	WT_3h
AT1G72990	beta-galactosidase 17;(source:Araport11)	BGAL17	A3	AT1G72990_P2	AT1G72990_P1	WT_24h	WT_3h
AT1G73290	serine carboxypeptidase-like 5;(source:Araport11)	scpl5	A5	AT1G73290_c1	AT1G73290_P3	WT_24h	WT_3h
AT1G73290	serine carboxypeptidase-like 5;(source:Araport11)	scpl5	IR	AT1G73290_c1	AT1G73290_P3	WT_24h	WT_3h
AT1G73290	serine carboxypeptidase-like 5;(source:Araport11)	scpl5	IR	AT1G73290_P2	AT1G73290_P3	WT_24h	WT_3h
AT1G73470	hypothetical protein;(source:Araport11)	NA	A3	AT1G73470_P2	AT1G73470.3	WT_24h	WT_3h
AT1G73470	hypothetical protein;(source:Araport11)	NA	IR	AT1G73470_P2	AT1G73470.3	WT_24h	WT_3h
AT1G73470	hypothetical protein;(source:Araport11)	NA	IR	AT1G73470_P2	AT1G73470_P1	WT_24h	WT_3h
AT1G73600	Encodes a S-adenosyl-L-methionine-dependent phosphoethanolamine N-methyltransferase whose expression is responsive to both phosphate (Pi) and phosphite (Phi) in roots. It catalyzes the three sequential P-base methylation of phosphoethanolamine to phosphocholine. Homologous biochemical function to NMT1 (At3g18000). Double mutants of NMT1 and NMT3 are defective in leaf, root, flower, seed, and poll…	AtPMT3,NMT,NMT3	ES	AT1G73600_ID1	AT1G73600.2	WT_24h	WT_3h
AT1G73640	RAB GTPase homolog A6A;(source:Araport11)	AtRABA6a,RABA6a	IR	AT1G73640_ID2	AT1G73640_P1	WT_24h	WT_3h
AT1G73750	alpha/beta hydrolase family protein;(source:Araport11)	NA	A5	AT1G73750_ID11	AT1G73750.1	WT_24h	WT_3h
AT1G73980	TTM1 is a triphosphate tunnel metalloenzyme that displays pyrophosphatase activity. It contains both a uridine kinase (UK) domain,CYTH domain, a coiled-coil domain and a transmembrane domain at the C-terminal Mutants show a delay in leaf senescence. Can functionally complement TTM1 and vise versa. (PMID:28733390)	AtTTM1,TTM1	A3	AT1G73980_c4	AT1G73980.1	WT_24h	WT_3h
AT1G74440	Similar to MPH1, can complement mph1-1 salt sensitivity phenotype.	NA	A3	AT1G74440.1	AT1G74440_s1	WT_24h	WT_3h
AT1G74440	Similar to MPH1, can complement mph1-1 salt sensitivity phenotype.	NA	A3	AT1G74440_ID2	AT1G74440_s1	WT_24h	WT_3h
AT1G74440	Similar to MPH1, can complement mph1-1 salt sensitivity phenotype.	NA	IR	AT1G74440_ID2	AT1G74440_s1	WT_24h	WT_3h
AT1G75420	UDP-Glycosyltransferase superfamily protein;(source:Araport11)	NA	IR	AT1G75420_P1	AT1G75420_P3	WT_24h	WT_3h
AT1G76170	2-thiocytidine tRNA biosynthesis protein, TtcA;(source:Araport11)	NA	A3	AT1G76170_P2	AT1G76170.1	WT_24h	WT_3h
AT1G76170	2-thiocytidine tRNA biosynthesis protein, TtcA;(source:Araport11)	NA	A5	AT1G76170_P2	AT1G76170.1	WT_24h	WT_3h
AT1G76170	2-thiocytidine tRNA biosynthesis protein, TtcA;(source:Araport11)	NA	IR	AT1G76170_P2	AT1G76170.1	WT_24h	WT_3h
AT1G76170	2-thiocytidine tRNA biosynthesis protein, TtcA;(source:Araport11)	NA	A3	AT1G76170_P2	AT1G76170_c2	WT_24h	WT_3h
AT1G76170	2-thiocytidine tRNA biosynthesis protein, TtcA;(source:Araport11)	NA	IR	AT1G76170_P2	AT1G76170_c2	WT_24h	WT_3h
AT1G76170	2-thiocytidine tRNA biosynthesis protein, TtcA;(source:Araport11)	NA	A3	AT1G76170_P2	AT1G76170_ID3	WT_24h	WT_3h
AT1G76170	2-thiocytidine tRNA biosynthesis protein, TtcA;(source:Araport11)	NA	IR	AT1G76170_P2	AT1G76170_ID3	WT_24h	WT_3h
AT1G76170	2-thiocytidine tRNA biosynthesis protein, TtcA;(source:Araport11)	NA	A3	AT1G76170_P2	AT1G76170_P3	WT_24h	WT_3h
AT1G76170	2-thiocytidine tRNA biosynthesis protein, TtcA;(source:Araport11)	NA	IR	AT1G76170_P2	AT1G76170_P3	WT_24h	WT_3h
AT1G77800	PHD finger family protein;(source:Araport11)	NA	IR	AT1G77800_P5	AT1G77800_P6	WT_24h	WT_3h
AT1G78040	Pollen Ole e 1 allergen and extensin family protein;(source:Araport11)	NA	A3	AT1G78040_JS1	AT1G78040_JS2	WT_24h	WT_3h
AT1G78040	Pollen Ole e 1 allergen and extensin family protein;(source:Araport11)	NA	A5	AT1G78040_JS1	AT1G78040_JS2	WT_24h	WT_3h
AT1G78770	anaphase promoting complex 6;(source:Araport11)	APC6	IR	AT1G78770_ID9	AT1G78770.1	WT_24h	WT_3h
AT1G78960	Encodes a multifunctional 2-3-oxidosqualene (OS)-triterpene cyclase that can cyclize OS into lupeol, alpha- and beta-amyrin.	ATLUP2,LUP2	IR	AT1G78960_P5	AT1G78960_s2	WT_24h	WT_3h
AT1G79590	Encodes one of 24 Arabidopsis syntaxins. Its mRNA has been shown to be expressed.	ATSYP52,SYP52	IR	AT1G79590_P2	AT1G79590_JS2	WT_24h	WT_3h
AT1G79590	Encodes one of 24 Arabidopsis syntaxins. Its mRNA has been shown to be expressed.	ATSYP52,SYP52	IR	AT1G79590_P2	AT1G79590_P1	WT_24h	WT_3h
AT1G79700	WRI4 encodes an AP2/ERF-type transcriptional activator that specifically controls cuticular wax biosynthesis in Arabidopsis stems. It also functions to activate transcription of genes involved fatty acid biosynthesis during seed and flower development as well as stem wax biosynthesis. Targets identified by ChIP-seq include: LACS1, KCR1, PAS2, ECR, and WSD1.	WRI4	ES	AT1G79700_P4	AT1G79700_ID13	WT_24h	WT_3h
AT1G79700	WRI4 encodes an AP2/ERF-type transcriptional activator that specifically controls cuticular wax biosynthesis in Arabidopsis stems. It also functions to activate transcription of genes involved fatty acid biosynthesis during seed and flower development as well as stem wax biosynthesis. Targets identified by ChIP-seq include: LACS1, KCR1, PAS2, ECR, and WSD1.	WRI4	IR	AT1G79700_P4	AT1G79700_ID13	WT_24h	WT_3h
AT1G79830	This gene is predicted to encode a protein that functions as a Golgi apparatus structural component known as a golgin in mammals and yeast. A fluorescently-tagged version of GC5 co-localizes with Golgi markers, and this localization appears to be replicated using the C-terminal (139 aa) portion of the protein. The C-terminal portion of the protein can also specifically interact with two members o…	GC5	IR	AT1G79830_P1	AT1G79830_ID28	WT_24h	WT_3h
AT1G80360	Encodes a methionine-specific aminotransferase that uses the ethylene biosynthetic intermediate methionine as an amino donor and the auxin biosynthetic intermediate indole-3-pyruvic acid as an amino acceptor to produce L-tryptophan and 2-oxo-4-methylthiobutyric acid. These actions allow VAS1 to coordinate both auxin and ethylene biosynthesis. It functions downstream of TAA1/SAV3 but upstream of Y…	ISS1,VAS1	IR	AT1G80360_P1	AT1G80360_c1	WT_24h	WT_3h
AT1G80360	Encodes a methionine-specific aminotransferase that uses the ethylene biosynthetic intermediate methionine as an amino donor and the auxin biosynthetic intermediate indole-3-pyruvic acid as an amino acceptor to produce L-tryptophan and 2-oxo-4-methylthiobutyric acid. These actions allow VAS1 to coordinate both auxin and ethylene biosynthesis. It functions downstream of TAA1/SAV3 but upstream of Y…	ISS1,VAS1	IR	AT1G80360_s3	AT1G80360_c1	WT_24h	WT_3h
AT1G80780	Deadenylase.	NA	IR	AT1G80780_P2	AT1G80780_P1	WT_24h	WT_3h
AT1G80810	One of 5 PO76/PDS5 cohesion cofactor orthologs of Arabidopsis.	AtPDS5D,PDS5D,SL2	A3	AT1G80810_P3	AT1G80810_c1	WT_24h	WT_3h
AT1G80810	One of 5 PO76/PDS5 cohesion cofactor orthologs of Arabidopsis.	AtPDS5D,PDS5D,SL2	IR	AT1G80810_P3	AT1G80810_P5	WT_24h	WT_3h
AT1G80940	Snf1 kinase interactor-like protein;(source:Araport11)	NA	IR	AT1G80940_JC4	AT1G80940_ID2	WT_24h	WT_3h
AT1G80940	Snf1 kinase interactor-like protein;(source:Araport11)	NA	IR	AT1G80940_JC4	AT1G80940_P1	WT_24h	WT_3h
AT2G01140	Aldolase superfamily protein;(source:Araport11)	AtFBA3,FBA3,PDE345	A3	AT2G01140.1	AT2G01140_ID4	WT_24h	WT_3h
AT2G01140	Aldolase superfamily protein;(source:Araport11)	AtFBA3,FBA3,PDE345	A5	AT2G01140.1	AT2G01140_ID4	WT_24h	WT_3h
AT2G02080	C2H2 BIRD transcription factor family.	AtIDD4,IDD4,IME	A5	AT2G02080_P4	AT2G02080_JS3	WT_24h	WT_3h
AT2G02080	C2H2 BIRD transcription factor family.	AtIDD4,IDD4,IME	IR	AT2G02080_P4	AT2G02080_JS3	WT_24h	WT_3h
AT2G02730	GRIP/coiled-coil protein, putative (DUF1664);(source:Araport11)	NA	IR	AT2G02730_P1	AT2G02730_ID4	WT_24h	WT_3h
AT2G03710	This gene belongs to the family of SEP genes. It is involved in the development of sepals, petals, stamens and carpels. Additionally, it plays a central role in the determination of flower meristem and organ identity.	AGL3,SEP4	ES	AT2G03710.1	AT2G03710_JC2	WT_24h	WT_3h
AT2G03710	This gene belongs to the family of SEP genes. It is involved in the development of sepals, petals, stamens and carpels. Additionally, it plays a central role in the determination of flower meristem and organ identity.	AGL3,SEP4	A3	AT2G03710.1	AT2G03710_JS1	WT_24h	WT_3h
AT2G03710	This gene belongs to the family of SEP genes. It is involved in the development of sepals, petals, stamens and carpels. Additionally, it plays a central role in the determination of flower meristem and organ identity.	AGL3,SEP4	ES	AT2G03710.1	AT2G03710_JS1	WT_24h	WT_3h
AT2G03710	This gene belongs to the family of SEP genes. It is involved in the development of sepals, petals, stamens and carpels. Additionally, it plays a central role in the determination of flower meristem and organ identity.	AGL3,SEP4	A3	AT2G03710.1	AT2G03710_P2	WT_24h	WT_3h
AT2G03710	This gene belongs to the family of SEP genes. It is involved in the development of sepals, petals, stamens and carpels. Additionally, it plays a central role in the determination of flower meristem and organ identity.	AGL3,SEP4	IR	AT2G03710.1	AT2G03710_P3	WT_24h	WT_3h
AT2G04050	MATE efflux family protein;(source:Araport11)	NA	ES	AT2G04050_JS4	AT2G04050_ID5	WT_24h	WT_3h
AT2G04050	MATE efflux family protein;(source:Araport11)	NA	IR	AT2G04050_JS4	AT2G04050_ID5	WT_24h	WT_3h
AT2G04235	hypothetical protein;(source:Araport11)	NA	A3	AT2G04235_P3	AT2G04235_JS1	WT_24h	WT_3h
AT2G04235	hypothetical protein;(source:Araport11)	NA	IR	AT2G04235_P3	AT2G04235_JS1	WT_24h	WT_3h
AT2G04800	hypothetical protein;(source:Araport11)	NA	A5	AT2G04800_c1	AT2G04800_s1	WT_24h	WT_3h
AT2G05310	transmembrane protein;(source:Araport11)	NA	A5	AT2G05310_P2	AT2G05310_P1	WT_24h	WT_3h
AT2G05310	transmembrane protein;(source:Araport11)	NA	IR	AT2G05310_P2	AT2G05310_P1	WT_24h	WT_3h
AT2G05380	glycine-rich protein 3 short isoform (GRP3S) mRNA, complete The mRNA is cell-to-cell mobile.	GRP3S	A3	AT2G05380_P3	AT2G05380_s2	WT_24h	WT_3h
AT2G05380	glycine-rich protein 3 short isoform (GRP3S) mRNA, complete The mRNA is cell-to-cell mobile.	GRP3S	A5	AT2G05380_P3	AT2G05380_s2	WT_24h	WT_3h
AT2G05380	glycine-rich protein 3 short isoform (GRP3S) mRNA, complete The mRNA is cell-to-cell mobile.	GRP3S	IR	AT2G05380_P3	AT2G05380_s2	WT_24h	WT_3h
AT2G05518	other_RNA;(source:Araport11)	NA	IR	AT2G05518.1	AT2G05518_ID2	WT_24h	WT_3h
AT2G05518	other_RNA;(source:Araport11)	NA	IR	AT2G05518_ID1	AT2G05518_ID2	WT_24h	WT_3h
AT2G05520	Encodes a glycine-rich protein that is expressed mainly in stems and leaves. AtGRP3 functions in root size determination during development and in Al stress. mRNA levels are upregulated in response to ABA, salicylic acid and ethylene but downregulated in response to desiccation. The mRNA is cell-to-cell mobile.	ATGRP-3,ATGRP3,GRP-3,GRP3	A3	AT2G05520_P1	AT2G05520_s3	WT_24h	WT_3h
AT2G05520	Encodes a glycine-rich protein that is expressed mainly in stems and leaves. AtGRP3 functions in root size determination during development and in Al stress. mRNA levels are upregulated in response to ABA, salicylic acid and ethylene but downregulated in response to desiccation. The mRNA is cell-to-cell mobile.	ATGRP-3,ATGRP3,GRP-3,GRP3	A5	AT2G05520_P1	AT2G05520_s3	WT_24h	WT_3h
AT2G05520	Encodes a glycine-rich protein that is expressed mainly in stems and leaves. AtGRP3 functions in root size determination during development and in Al stress. mRNA levels are upregulated in response to ABA, salicylic acid and ethylene but downregulated in response to desiccation. The mRNA is cell-to-cell mobile.	ATGRP-3,ATGRP3,GRP-3,GRP3	IR	AT2G05520_P1	AT2G05520_s3	WT_24h	WT_3h
AT2G05710	Encodes an aconitase that can catalyze the conversion of citrate to isocitrate through a cis-aconitate intermediate, indicating that it may participate in the TCA cycle and other primary metabolic pathways. The protein is believed to accumulate in the mitochondria and the cytosol. It affects CSD2 (At2g28190 - a superoxide dismutase) transcript levels and may play a role in the response to oxidati…	ACO3	A3	AT2G05710_P1	AT2G05710_ID13	WT_24h	WT_3h
AT2G05710	Encodes an aconitase that can catalyze the conversion of citrate to isocitrate through a cis-aconitate intermediate, indicating that it may participate in the TCA cycle and other primary metabolic pathways. The protein is believed to accumulate in the mitochondria and the cytosol. It affects CSD2 (At2g28190 - a superoxide dismutase) transcript levels and may play a role in the response to oxidati…	ACO3	A5	AT2G05710_P1	AT2G05710_ID13	WT_24h	WT_3h
AT2G12646	Plant AT-rich sequence and zinc-binding transcription factor (PLATZ) family protein which plays central role in mediating RGF1 signalling. Controls root meristem size through ROS signalling.	NA	A3	AT2G12646_ID1	AT2G12646_P1	WT_24h	WT_3h
AT2G14060	encodes a protein whose sequence is similar to SAM:salicylic acid carboxyl methyltransferase (SAMT) (GI:6002712)(Clarkia breweri) and to SAM:benzoic acid carboxyl methyltransferase (BAMT)(GI:9789277)(Antirrhinum majus)	NA	IR	AT2G14060_P2	AT2G14060_P1	WT_24h	WT_3h
AT2G14110	Haloacid dehalogenase-like hydrolase (HAD) superfamily protein;(source:Araport11)	NA	IR	AT2G14110_ID2	AT2G14110_P1	WT_24h	WT_3h
AT2G15290	Encodes a protein located in the chloroplast inner envelope. The study of mutant defective in the gene product suggests that the protein is involved in the translocation of protein across the envelope membrane into the chloroplast stroma.	AtTic21,CIA5,PIC1,TIC21	A3	AT2G15290_P1	AT2G15290_ID1	WT_24h	WT_3h
AT2G15290	Encodes a protein located in the chloroplast inner envelope. The study of mutant defective in the gene product suggests that the protein is involved in the translocation of protein across the envelope membrane into the chloroplast stroma.	AtTic21,CIA5,PIC1,TIC21	A5	AT2G15290_P1	AT2G15290_ID1	WT_24h	WT_3h
AT2G15730	P-loop containing nucleoside triphosphate hydrolases superfamily protein;(source:Araport11)	NA	IR	AT2G15730_JS2	AT2G15730_P1	WT_24h	WT_3h
AT2G16405	Transducin/WD40 repeat-like superfamily protein;(source:Araport11)	NA	A3	AT2G16405_P1	AT2G16405_c5	WT_24h	WT_3h
AT2G16405	Transducin/WD40 repeat-like superfamily protein;(source:Araport11)	NA	IR	AT2G16405_P1	AT2G16405_c5	WT_24h	WT_3h
AT2G16790	P-loop containing nucleoside triphosphate hydrolases superfamily protein;(source:Araport11)	NA	IR	AT2G16790_P1	AT2G16790_P3	WT_24h	WT_3h
AT2G16900	phospholipase-like protein (PEARLI 4) family protein;(source:Araport11)	NA	IR	AT2G16900_P7	AT2G16900_P4	WT_24h	WT_3h
AT2G17150	Plant regulator RWP-RK family protein;(source:Araport11)	NLP1	A5	AT2G17150_P3	AT2G17150_P5	WT_24h	WT_3h
AT2G17360	Ribosomal protein S4 (RPS4A) family protein;(source:Araport11)	NA	IR	AT2G17360_P1	AT2G17360.2	WT_24h	WT_3h
AT2G17730	Intrinsic thylakoid membrane protein that fixes RPOTmp on the stromal side of the thylakoid membrane.	NIP2	A3	AT2G17730_P1	AT2G17730_c1	WT_24h	WT_3h
AT2G17730	Intrinsic thylakoid membrane protein that fixes RPOTmp on the stromal side of the thylakoid membrane.	NIP2	IR	AT2G17730_P1	AT2G17730_c1	WT_24h	WT_3h
AT2G18290	Encodes APC10 (anaphase promoting complex 10). Overexpression of APC10 likely mimics auxin and ethylene sensitive phenotypes. Plays an essential role in cell proliferation during leaf development.	APC10,AtAPC10,EMB2783	IR	AT2G18290.1	AT2G18290_c1	WT_24h	WT_3h
AT2G18760	chromatin remodeling 8;(source:Araport11)	CHR8	A3	AT2G18760_JC10	AT2G18760_c1	WT_24h	WT_3h
AT2G18760	chromatin remodeling 8;(source:Araport11)	CHR8	A5	AT2G18760_P6	AT2G18760_c1	WT_24h	WT_3h
AT2G18760	chromatin remodeling 8;(source:Araport11)	CHR8	IR	AT2G18760_P6	AT2G18760_c1	WT_24h	WT_3h
AT2G18760	chromatin remodeling 8;(source:Araport11)	CHR8	IR	AT2G18760_JC10	AT2G18760_c1	WT_24h	WT_3h
AT2G19860	Encodes a protein with hexokinase activity (AtHXK2) and acts as a sensor for plant sugar responses.	ATHXK2,HXK2	IR	AT2G19860_P1	AT2G19860_P2	WT_24h	WT_3h
AT2G20080	hypothetical protein;(source:Araport11)	TIE2	ES	AT2G20080_P2	AT2G20080_P1	WT_24h	WT_3h
AT2G20080	hypothetical protein;(source:Araport11)	TIE2	IR	AT2G20080_s1	AT2G20080_P1	WT_24h	WT_3h
AT2G20420	ATP citrate lyase (ACL) family protein;(source:Araport11)	NA	A5	AT2G20420_P1	AT2G20420_c1	WT_24h	WT_3h
AT2G20420	ATP citrate lyase (ACL) family protein;(source:Araport11)	NA	ES	AT2G20420_P1	AT2G20420_c1	WT_24h	WT_3h
AT2G21160	Translocon-associated protein (TRAP), alpha subunit;(source:Araport11)	NA	A3	AT2G21160_P1	AT2G21160.2	WT_24h	WT_3h
AT2G21160	Translocon-associated protein (TRAP), alpha subunit;(source:Araport11)	NA	A5	AT2G21160_P1	AT2G21160.2	WT_24h	WT_3h
AT2G21160	Translocon-associated protein (TRAP), alpha subunit;(source:Araport11)	NA	ES	AT2G21160_P1	AT2G21160.2	WT_24h	WT_3h
AT2G21280	A nuclear-encoded, plastid-targeted protein (AtSulA) whose overexpression causes severe yet stochastic plastid (shown in chloroplasts and leucoplasts) division defects. The protein does not appear to interact with either AtFtsZ proteins when studied in a yeast two-hybrid system.	ATSULA,GC1,SULA	A5	AT2G21280_ID12	AT2G21280.1	WT_24h	WT_3h
AT2G21300	ATP binding microtubule motor family protein;(source:Araport11)	NA	IR	AT2G21300_P2	AT2G21300_JC8	WT_24h	WT_3h
AT2G21300	ATP binding microtubule motor family protein;(source:Araport11)	NA	MES	AT2G21300_P2	AT2G21300_JC8	WT_24h	WT_3h
AT2G21300	ATP binding microtubule motor family protein;(source:Araport11)	NA	IR	AT2G21300_P2	AT2G21300_P4	WT_24h	WT_3h
AT2G21660	Encodes a small glycine-rich RNA binding protein that is part of a negative-feedback loop through which AtGRP7 regulates the circadian oscillations of its own transcript. Gene expression is induced by cold. GRP7 appears to promote stomatal opening and reduce tolerance under salt and dehydration stress conditions, but, promotes stomatal closing and thereby increases stress tolerance under conditio…	ATGRP7,CCR2,GR-RBP7,GRP7,RBGA3	A5	AT2G21660_JS19	AT2G21660_JS20	WT_24h	WT_3h
AT2G22920	serine carboxypeptidase-like 12;(source:Araport11)	FPT1,SCPL12	A3	AT2G22920_s3	AT2G22920_c4	WT_24h	WT_3h
AT2G22920	serine carboxypeptidase-like 12;(source:Araport11)	FPT1,SCPL12	A5	AT2G22920_s3	AT2G22920_c4	WT_24h	WT_3h
AT2G22920	serine carboxypeptidase-like 12;(source:Araport11)	FPT1,SCPL12	ES	AT2G22920_s3	AT2G22920_c4	WT_24h	WT_3h
AT2G22920	serine carboxypeptidase-like 12;(source:Araport11)	FPT1,SCPL12	ES	AT2G22920_P2	AT2G22920_c4	WT_24h	WT_3h
AT2G22920	serine carboxypeptidase-like 12;(source:Araport11)	FPT1,SCPL12	IR	AT2G22920_s3	AT2G22920_c4	WT_24h	WT_3h
AT2G23130	AGP17 is a lysine-rich arabinogalactan-protein (AGP) and part of a multi-gene family of glycoproteins with approx. 50 members. It falls into one subclass with AGP18 and AGP19, other lysine-rich AGPs. 84% of its proline residues are hydroxylated to hydroproline and its heavy glycosylation accounts for appr. 69% of the molecular weight. The main glycosyl residues are arabinose (30.1%) and galactose…	AGP17,ATAGP17	IR	AT2G23130_P1	AT2G23130_P2	WT_24h	WT_3h
AT2G23985	hypothetical protein;(source:Araport11)	NA	ES	AT2G23985_P10	AT2G23985_JS2	WT_24h	WT_3h
AT2G23985	hypothetical protein;(source:Araport11)	NA	IR	AT2G23985_P10	AT2G23985_JS2	WT_24h	WT_3h
AT2G23985	hypothetical protein;(source:Araport11)	NA	IR	AT2G23985_P10	AT2G23985_P11	WT_24h	WT_3h
AT2G23985	hypothetical protein;(source:Araport11)	NA	A3	AT2G23985_P10	AT2G23985_s9	WT_24h	WT_3h
AT2G23985	hypothetical protein;(source:Araport11)	NA	IR	AT2G23985_P10	AT2G23985_s9	WT_24h	WT_3h
AT2G24260	Encodes a basic helix-loop-helix (bHLH) protein that regulates root hair and sperm cell development. One of the three Arabidopsis homologs of the Lotus japonicus ROOTHAIRLESS1 (LjRHL1) gene: At2g24260 (AtLRL1), At4g30980 (AtLRL2), and At5g58010 (AtLRL3).	DROP1,LRL1	IR	AT2G24260_P1	AT2G24260_P2	WT_24h	WT_3h
AT2G24690	Transcriptional factor B3 family protein;(source:Araport11)	NA	A5	AT2G24690_s4	AT2G24690_ID17	WT_24h	WT_3h
AT2G24690	Transcriptional factor B3 family protein;(source:Araport11)	NA	IR	AT2G24690_c3	AT2G24690_ID17	WT_24h	WT_3h
AT2G24690	Transcriptional factor B3 family protein;(source:Araport11)	NA	IR	AT2G24690_ID4	AT2G24690_ID17	WT_24h	WT_3h
AT2G24690	Transcriptional factor B3 family protein;(source:Araport11)	NA	IR	AT2G24690_s4	AT2G24690_ID17	WT_24h	WT_3h
AT2G24690	Transcriptional factor B3 family protein;(source:Araport11)	NA	MES	AT2G24690_s4	AT2G24690_ID17	WT_24h	WT_3h
AT2G25080	Encodes glutathione peroxidase. The mRNA is cell-to-cell mobile.	ATGPX1,GPX1,GPXL1	A5	AT2G25080_P1	AT2G25080_ID1	WT_24h	WT_3h
AT2G25355	PNAS-3-like protein;(source:Araport11)	NA	A3	AT2G25355_c1	AT2G25355.2	WT_24h	WT_3h
AT2G25355	PNAS-3-like protein;(source:Araport11)	NA	A3	AT2G25355_P1	AT2G25355.2	WT_24h	WT_3h
AT2G25355	PNAS-3-like protein;(source:Araport11)	NA	IR	AT2G25355_c1	AT2G25355.2	WT_24h	WT_3h
AT2G25355	PNAS-3-like protein;(source:Araport11)	NA	IR	AT2G25355_c1	AT2G25355_ID44	WT_24h	WT_3h
AT2G25355	PNAS-3-like protein;(source:Araport11)	NA	IR	AT2G25355_P1	AT2G25355_ID44	WT_24h	WT_3h
AT2G25355	PNAS-3-like protein;(source:Araport11)	NA	IR	AT2G25355_P1	AT2G25355_ID46	WT_24h	WT_3h
AT2G25355	PNAS-3-like protein;(source:Araport11)	NA	IR	AT2G25355_c1	AT2G25355_ID47	WT_24h	WT_3h
AT2G25355	PNAS-3-like protein;(source:Araport11)	NA	IR	AT2G25355_P1	AT2G25355_ID47	WT_24h	WT_3h
AT2G25605	DNA-directed RNA polymerase subunit beta;(source:Araport11)	NA	A3	AT2G25605_ID4	AT2G25605.1	WT_24h	WT_3h
AT2G25605	DNA-directed RNA polymerase subunit beta;(source:Araport11)	NA	IR	AT2G25605_ID4	AT2G25605.1	WT_24h	WT_3h
AT2G26540	Encodes a uroporphyrinogen-III synthase involved in tetrapyrrole biosynthesis. The protein localizes to the chloroplast. Member of the plant-specific DUF724 protein family. Arabidopsis has 10 DUF724 proteins. Loss of function mutant has a WT phenotype	ATDUF3,ATUROS,DUF3,HEMD,UROS	IR	AT2G26540_s2	AT2G26540_P1	WT_24h	WT_3h
AT2G26650	Encodes AKT1, a member of the Shaker family inward rectifying potassium channel predominantly expressed in predominantly in root hairs and root endodermis. This family includes five groups based on phylogenetic analysis (FEBS Letters (2007) 581: 2357): I (inward rectifying channel): AKT1 (AT2G26650), AKT5 (AT4G32500) and SPIK (also known as AKT6, AT2G25600); II (inward rectifying channel): KAT1 (…	AKT1,ATAKT1,KT1	IR	AT2G26650_ID4	AT2G26650_P1	WT_24h	WT_3h
AT2G26930	Encodes a 4-(cytidine 5'-phospho)-2-C-methyl-D-erithritol kinase.	ATCDPMEK,CDPMEK,CMEK,CMK,ISPE,PDE277	A5	AT2G26930_ID16	AT2G26930_P1	WT_24h	WT_3h
AT2G27150	Encodes the aldehyde oxidase delta isoform catalyzing the final step in abscisic acid biosynthesis.	AAO3,AOdelta,At-AO3,AtAAO3	IR	AT2G27150_P3	AT2G27150_P1	WT_24h	WT_3h
AT2G27150	Encodes the aldehyde oxidase delta isoform catalyzing the final step in abscisic acid biosynthesis.	AAO3,AOdelta,At-AO3,AtAAO3	IR	AT2G27150_P3	AT2G27150_P6	WT_24h	WT_3h
AT2G27730	copper ion binding protein;(source:Araport11)	NA	A5	AT2G27730_P1	AT2G27730_P4	WT_24h	WT_3h
AT2G28305	Putative lysine decarboxylase family protein;(source:Araport11)	ATLOG1,LOG1	IR	AT2G28305_P1	AT2G28305_s2	WT_24h	WT_3h
AT2G28360	SIT4 phosphatase-associated family protein;(source:Araport11)	NA	A3	AT2G28360_P1	AT2G28360_JC2	WT_24h	WT_3h
AT2G28540	RNA binding (RRM/RBD/RNP motifs) family protein;(source:Araport11)	NA	IR	AT2G28540_P2	AT2G28540.1	WT_24h	WT_3h
AT2G28550	AP2 family transcription factor that is involved in regulation of flowering and innate immunity.Interacts with CRY2 to regulate CO and FT. TOE1 binds to activation domain of CO and binds CORE sequences of the FT promoter.TOE1/TOE2 are also targets of MiR172b and function in regulation of innate immunity.	RAP2.7,TOE1	IR	AT2G28550_P1	AT2G28550.2	WT_24h	WT_3h
AT2G28550	AP2 family transcription factor that is involved in regulation of flowering and innate immunity.Interacts with CRY2 to regulate CO and FT. TOE1 binds to activation domain of CO and binds CORE sequences of the FT promoter.TOE1/TOE2 are also targets of MiR172b and function in regulation of innate immunity.	RAP2.7,TOE1	ES	AT2G28550_P1	AT2G28550_P2	WT_24h	WT_3h
AT2G28550	AP2 family transcription factor that is involved in regulation of flowering and innate immunity.Interacts with CRY2 to regulate CO and FT. TOE1 binds to activation domain of CO and binds CORE sequences of the FT promoter.TOE1/TOE2 are also targets of MiR172b and function in regulation of innate immunity.	RAP2.7,TOE1	IR	AT2G28550_P1	AT2G28550_P2	WT_24h	WT_3h
AT2G28940	Protein kinase superfamily protein;(source:Araport11)	NA	A3	AT2G28940_ID5	AT2G28940_ID3	WT_24h	WT_3h
AT2G28940	Protein kinase superfamily protein;(source:Araport11)	NA	IR	AT2G28940_ID5	AT2G28940_ID3	WT_24h	WT_3h
AT2G28940	Protein kinase superfamily protein;(source:Araport11)	NA	A3	AT2G28940_ID5	AT2G28940_P2	WT_24h	WT_3h
AT2G28940	Protein kinase superfamily protein;(source:Araport11)	NA	IR	AT2G28940_ID5	AT2G28940_P2	WT_24h	WT_3h
AT2G29340	NAD-dependent epimerase/dehydratase family protein;(source:Araport11)	NA	A5	AT2G29340_P2	AT2G29340_P1	WT_24h	WT_3h
AT2G29340	NAD-dependent epimerase/dehydratase family protein;(source:Araport11)	NA	IR	AT2G29340_P2	AT2G29340_P1	WT_24h	WT_3h
AT2G29525	Inositol phosphorylceramide synthase	AtIPCS3	A5	AT2G29525_ID3	AT2G29525_P1	WT_24h	WT_3h
AT2G29525	Inositol phosphorylceramide synthase	AtIPCS3	IR	AT2G29525_ID3	AT2G29525_P1	WT_24h	WT_3h
AT2G29630	Encodes a protein involved in thiamin biosynthesis. The protein is an iron-sulfur cluster protein predicted to catalyze the conversion of 5-aminoimidazole ribonucleotide (AIR) to hydroxymethylpyrimidine (HMP) or hydroxymethylpyrimidine phosphate (HMP-P). A severe reduction of THIC levels in plants decreases vitamin B1 (thiamin diphosphate (TPP)) levels and also leads to changes in the levels of n…	PY,THIC	A3	AT2G29630_P2	AT2G29630.3	WT_24h	WT_3h
AT2G29630	Encodes a protein involved in thiamin biosynthesis. The protein is an iron-sulfur cluster protein predicted to catalyze the conversion of 5-aminoimidazole ribonucleotide (AIR) to hydroxymethylpyrimidine (HMP) or hydroxymethylpyrimidine phosphate (HMP-P). A severe reduction of THIC levels in plants decreases vitamin B1 (thiamin diphosphate (TPP)) levels and also leads to changes in the levels of n…	PY,THIC	A5	AT2G29630_P2	AT2G29630.3	WT_24h	WT_3h
AT2G30170	Encodes a chloroplast PP2C phosphatase that is required for efficient dephosphorylation of PSII proteins and involved in light acclimation.Loss of function enhances immunity to bacterial pathogens.	PBCP	IR	AT2G30170_P4	AT2G30170_P5	WT_24h	WT_3h
AT2G31580	ICA1 is a nuclear localized member of the tRNA(His) guanylyl transferase superfamily. Loss of function alleles show increased sensitivity to growth at high temperatures defects in cell cycle progression and DNA repair.	ICA1	IR	AT2G31580_ID7	AT2G31580_ID8	WT_24h	WT_3h
AT2G31580	ICA1 is a nuclear localized member of the tRNA(His) guanylyl transferase superfamily. Loss of function alleles show increased sensitivity to growth at high temperatures defects in cell cycle progression and DNA repair.	ICA1	A5	AT2G31580_ID7	AT2G31580_P2	WT_24h	WT_3h
AT2G31580	ICA1 is a nuclear localized member of the tRNA(His) guanylyl transferase superfamily. Loss of function alleles show increased sensitivity to growth at high temperatures defects in cell cycle progression and DNA repair.	ICA1	A3	AT2G31580_ID7	AT2G31580_s2	WT_24h	WT_3h
AT2G31660	SAD2 (super sensitive to ABA and drought 2) encodes an importin beta-domain family protein likely to be involved in nuclear transport in ABA signaling. Subcellular localization of GFP-tagged SAD2 showed a predominantly nuclear localization, consistent with a role for SAD2 in nuclear transport. Mutation of SAD2 in Arabidopsis alters abscisic acid sensitivity. SAD2 was ubiquitously expressed at low…	EMA1,SAD2,URM9	IR	AT2G31660_P1	AT2G31660_ID18	WT_24h	WT_3h
AT2G32530	encodes a gene similar to cellulose synthase	ATCSLB03,ATCSLB3,CSLB03	IR	AT2G32530_P1	AT2G32530_JS2	WT_24h	WT_3h
AT2G32640	Encodes a lycopene beta cyclase that catalyzes the addition of beta-ionone end groups to the end of lycopene molecules.	LCYB	A3	AT2G32640_P2	AT2G32640_P1	WT_24h	WT_3h
AT2G32700	Encodes a WD40 repeat and LUFS domain containing protein that is similar to LUG. Interacts physically with SEUSS and likely functions as part of a repressor complex that represses AG. Involved in cell wall modifications necessary for mucilage extrusion and mediates aluminium sensitivity through PECTIN METHYLESTERASE46-modulated root cell wall pectin methylesterification.	LUH,MUM1	A3	AT2G32700_P4	AT2G32700_c3	WT_24h	WT_3h
AT2G32700	Encodes a WD40 repeat and LUFS domain containing protein that is similar to LUG. Interacts physically with SEUSS and likely functions as part of a repressor complex that represses AG. Involved in cell wall modifications necessary for mucilage extrusion and mediates aluminium sensitivity through PECTIN METHYLESTERASE46-modulated root cell wall pectin methylesterification.	LUH,MUM1	A3	AT2G32700_P4	AT2G32700_ID25	WT_24h	WT_3h
AT2G34770	encodes a fatty acid hydroxylase, required for the AtBI-1-mediated suppression of programmed cell death.	ATFAH1,FAH1	ES	AT2G34770.1	AT2G34770_ID5	WT_24h	WT_3h
AT2G35390	Phosphoribosyltransferase family protein;(source:Araport11)	NA	IR	AT2G35390_P2	AT2G35390_P1	WT_24h	WT_3h
AT2G35630	Member of the MAP215 family of microtubule-associated proteins required to establish interphase arrays of cortical microtubules.Mutants have defects in cytokinesis during pollen development. Vegetative phenotypes observed in temperature sensitive mutants include left-handed organ twisting, isotropic cell expansion and impairment of root hair polarity. The mRNA is cell-to-cell mobile.	GEM1,MOR1	IR	AT2G35630_P1	AT2G35630_JS2	WT_24h	WT_3h
AT2G35630	Member of the MAP215 family of microtubule-associated proteins required to establish interphase arrays of cortical microtubules.Mutants have defects in cytokinesis during pollen development. Vegetative phenotypes observed in temperature sensitive mutants include left-handed organ twisting, isotropic cell expansion and impairment of root hair polarity. The mRNA is cell-to-cell mobile.	GEM1,MOR1	A3	AT2G35630_P1	AT2G35630_s1	WT_24h	WT_3h
AT2G35630	Member of the MAP215 family of microtubule-associated proteins required to establish interphase arrays of cortical microtubules.Mutants have defects in cytokinesis during pollen development. Vegetative phenotypes observed in temperature sensitive mutants include left-handed organ twisting, isotropic cell expansion and impairment of root hair polarity. The mRNA is cell-to-cell mobile.	GEM1,MOR1	IR	AT2G35630_P1	AT2G35630_s1	WT_24h	WT_3h
AT2G35940	Encodes a member of the BEL-like homeodomain protein family. Ecotopic expression in the embryo sac leads to defects in nuclear migration and cellularization and embryo sacs with multiple egg cells. Loss of function alleles have no female gametophyte defects. The ecotopic expression phenotype requires KNAT3 because it can be suppressed by loss of KNAT3 function alleles. Localized to the nucleus bu…	BLH1,EDA29	IR	AT2G35940_P3	AT2G35940_ID17	WT_24h	WT_3h
AT2G36070	One of two genes in Arabidopsis that encode a putative subunit of the mitochondrial inner membrane translocase complex. TIM44 subunit is thought to provide the energy for translocation via hydrolysis of ATP.	ATTIM44-2,TIM44-2	A3	AT2G36070_P1	AT2G36070_s1	WT_24h	WT_3h
AT2G36070	One of two genes in Arabidopsis that encode a putative subunit of the mitochondrial inner membrane translocase complex. TIM44 subunit is thought to provide the energy for translocation via hydrolysis of ATP.	ATTIM44-2,TIM44-2	A5	AT2G36070_P1	AT2G36070_s1	WT_24h	WT_3h
AT2G36070	One of two genes in Arabidopsis that encode a putative subunit of the mitochondrial inner membrane translocase complex. TIM44 subunit is thought to provide the energy for translocation via hydrolysis of ATP.	ATTIM44-2,TIM44-2	ES	AT2G36070_P1	AT2G36070_s1	WT_24h	WT_3h
AT2G36620	RPL24A encodes ribosomal protein L24, homolog of cytosolic RPL24, found in archaea and higher eukaryotes. Arabidopsis has two RPL24 homologs, RPL24A (AT2G36620) and RPL24B (AT3G53020).	RPL24A	A3	AT2G36620_P1	AT2G36620_ID24	WT_24h	WT_3h
AT2G36620	RPL24A encodes ribosomal protein L24, homolog of cytosolic RPL24, found in archaea and higher eukaryotes. Arabidopsis has two RPL24 homologs, RPL24A (AT2G36620) and RPL24B (AT3G53020).	RPL24A	A5	AT2G36620_P1	AT2G36620_ID24	WT_24h	WT_3h
AT2G36900	member of Membrin Gene Family	ATMEMB11,MEMB11	IR	AT2G36900_P1	AT2G36900_P2	WT_24h	WT_3h
AT2G36980	Tetratricopeptide repeat (TPR)-like superfamily protein;(source:Araport11)	NA	A3	AT2G36980_P1	AT2G36980_P2	WT_24h	WT_3h
AT2G36980	Tetratricopeptide repeat (TPR)-like superfamily protein;(source:Araport11)	NA	IR	AT2G36980_P1	AT2G36980_P2	WT_24h	WT_3h
AT2G37040	Encodes PAL1, a phenylalanine ammonia-lyase. Arabidopsis has four PALs: AT2G37040 (PAL1), AT3G53260 (PAL2), AT5G04230 (PAL3) and AT3G10340 (PAL4).	ATPAL1,PAL1	IR	AT2G37040_P1	AT2G37040_c1	WT_24h	WT_3h
AT2G37150	RING/U-box superfamily protein;(source:Araport11)	NA	A5	AT2G37150_JC2	AT2G37150.1	WT_24h	WT_3h
AT2G37150	RING/U-box superfamily protein;(source:Araport11)	NA	MES	AT2G37150_JC2	AT2G37150.1	WT_24h	WT_3h
AT2G37150	RING/U-box superfamily protein;(source:Araport11)	NA	A5	AT2G37150_JC2	AT2G37150_ID96	WT_24h	WT_3h
AT2G37150	RING/U-box superfamily protein;(source:Araport11)	NA	IR	AT2G37150_JC2	AT2G37150_ID96	WT_24h	WT_3h
AT2G37150	RING/U-box superfamily protein;(source:Araport11)	NA	MES	AT2G37150_JC2	AT2G37150_ID96	WT_24h	WT_3h
AT2G37450	nodulin MtN21-like transporter family protein	UMAMIT13	ES	AT2G37450_P2	AT2G37450_P3	WT_24h	WT_3h
AT2G37450	nodulin MtN21-like transporter family protein	UMAMIT13	IR	AT2G37450_P2	AT2G37450_P3	WT_24h	WT_3h
AT2G37620	Member of the actin gene family. Expressed in mature pollen.	AAc1,ACT1	A5	AT2G37620_P1	AT2G37620_c1	WT_24h	WT_3h
AT2G37870	Bifunctional inhibitor/lipid-transfer protein/seed storage 2S albumin superfamily protein;(source:Araport11)	NA	IR	AT2G37870_ID2	AT2G37870_P1	WT_24h	WT_3h
AT2G37930	hypothetical protein (DUF3527);(source:Araport11)	NA	A5	AT2G37930_P2	AT2G37930_s2	WT_24h	WT_3h
AT2G37930	hypothetical protein (DUF3527);(source:Araport11)	NA	IR	AT2G37930_P2	AT2G37930_s2	WT_24h	WT_3h
AT2G38550	Mediates fatty acid transport from plastid.	NA	ES	AT2G38550_P1	AT2G38550_ID4	WT_24h	WT_3h
AT2G38550	Mediates fatty acid transport from plastid.	NA	IR	AT2G38550_P1	AT2G38550_s1	WT_24h	WT_3h
AT2G38880	Encodes a transcription factor from the nuclear factor Y (NF-Y) family, AtNF-YB1. Confers drought tolerance.	ATHAP3,ATNF-YB1,HAP3,HAP3A,NF-YB1	A5	AT2G38880_s1	AT2G38880_P6	WT_24h	WT_3h
AT2G38880	Encodes a transcription factor from the nuclear factor Y (NF-Y) family, AtNF-YB1. Confers drought tolerance.	ATHAP3,ATNF-YB1,HAP3,HAP3A,NF-YB1	IR	AT2G38880_s1	AT2G38880_P6	WT_24h	WT_3h
AT2G38980	pseudogene of cationic amino acid transporter 4;(source:Araport11)	NA	A3	AT2G38980_c5	AT2G38980.1	WT_24h	WT_3h
AT2G38980	pseudogene of cationic amino acid transporter 4;(source:Araport11)	NA	ES	AT2G38980_c5	AT2G38980.1	WT_24h	WT_3h
AT2G38980	pseudogene of cationic amino acid transporter 4;(source:Araport11)	NA	IR	AT2G38980_c5	AT2G38980.1	WT_24h	WT_3h
AT2G39445	Phosphatidylinositol N-acetylglucosaminyltransferase, GPI19/PIG-P subunit;(source:Araport11)	NA	A5	AT2G39445_P1	AT2G39445_JC2	WT_24h	WT_3h
AT2G39445	Phosphatidylinositol N-acetylglucosaminyltransferase, GPI19/PIG-P subunit;(source:Araport11)	NA	A5	AT2G39445_P1	AT2G39445_JS1	WT_24h	WT_3h
AT2G39445	Phosphatidylinositol N-acetylglucosaminyltransferase, GPI19/PIG-P subunit;(source:Araport11)	NA	IR	AT2G39445_P1	AT2G39445_P3	WT_24h	WT_3h
AT2G39470	PsbP-like protein 2;(source:Araport11)	PnsL1,PPL2	A5	AT2G39470_ID4	AT2G39470.2	WT_24h	WT_3h
AT2G39470	PsbP-like protein 2;(source:Araport11)	PnsL1,PPL2	IR	AT2G39470_ID4	AT2G39470.2	WT_24h	WT_3h
AT2G39730	Rubisco activase, a nuclear-encoded chloroplast protein that consists of two isoforms arising from alternative splicing in most plants. Required for the light activation of rubisco. Involved in jasmonate-induced leaf senescence.	RCA	A5	AT2G39730_P2	AT2G39730_P1	WT_24h	WT_3h
AT2G39730	Rubisco activase, a nuclear-encoded chloroplast protein that consists of two isoforms arising from alternative splicing in most plants. Required for the light activation of rubisco. Involved in jasmonate-induced leaf senescence.	RCA	IR	AT2G39730_JC4	AT2G39730_P1	WT_24h	WT_3h
AT2G40400	Encodes a chloroplast localized protein of unknown function that is involved in regulation of chloroplast development.	BPG3,RER5	IR	AT2G40400_P1	AT2G40400_P2	WT_24h	WT_3h
AT2G40820	stomatal closure actin-binding-like protein;(source:Araport11)	NA	IR	AT2G40820_P5	AT2G40820_P4	WT_24h	WT_3h
AT2G41340	NRPE5-like protein of unknown function; homologous to budding yeast RPB5	RPB5D	A3	AT2G41340_ID6	AT2G41340_ID5	WT_24h	WT_3h
AT2G41340	NRPE5-like protein of unknown function; homologous to budding yeast RPB5	RPB5D	IR	AT2G41340_ID6	AT2G41340_ID5	WT_24h	WT_3h
AT2G41560	Encodes a calmodulin-regulated Ca(2+)-ATPase that improves salt tolerance in yeast. Localized to the vacuole. Lesion mimic phenotype when mutation in the gene is combined with a mutation in ACA11. Lesion mimic phenotype of double knockout can be suppressed by nutritional supplements that increase anion levels (e.g. 15 mM Nitrate, Chloride, or Phosphate).	ACA4	A3	AT2G41560_P1	AT2G41560_c2	WT_24h	WT_3h
AT2G41560	Encodes a calmodulin-regulated Ca(2+)-ATPase that improves salt tolerance in yeast. Localized to the vacuole. Lesion mimic phenotype when mutation in the gene is combined with a mutation in ACA11. Lesion mimic phenotype of double knockout can be suppressed by nutritional supplements that increase anion levels (e.g. 15 mM Nitrate, Chloride, or Phosphate).	ACA4	ES	AT2G41560_P1	AT2G41560_c2	WT_24h	WT_3h
AT2G41840	Ribosomal protein S5 family protein;(source:Araport11)	NA	A3	AT2G41840_ID20	AT2G41840_ID19	WT_24h	WT_3h
AT2G41840	Ribosomal protein S5 family protein;(source:Araport11)	NA	A3	AT2G41840_P1	AT2G41840_ID19	WT_24h	WT_3h
AT2G41840	Ribosomal protein S5 family protein;(source:Araport11)	NA	A5	AT2G41840_ID20	AT2G41840_ID19	WT_24h	WT_3h
AT2G41840	Ribosomal protein S5 family protein;(source:Araport11)	NA	IR	AT2G41840_P1	AT2G41840_ID19	WT_24h	WT_3h
AT2G42010	phospholipase D (PLDbeta)	PLDBETA,PLDBETA1	IR	AT2G42010_P2	AT2G42010_P1	WT_24h	WT_3h
AT2G42300	Together with bHLH60 associates with phytochrome interacting factor 7 to regulate hypocotyl elongation.	NA	A5	AT2G42300_P1	AT2G42300_s1	WT_24h	WT_3h
AT2G43640	Signal recognition particle, SRP9/SRP14 subunit;(source:Araport11)	NA	A5	AT2G43640_ID6	AT2G43640.1	WT_24h	WT_3h
AT2G43640	Signal recognition particle, SRP9/SRP14 subunit;(source:Araport11)	NA	IR	AT2G43640_ID6	AT2G43640.1	WT_24h	WT_3h
AT2G43760	molybdopterin biosynthesis MoaE family protein;(source:Araport11)	CNX6	A5	AT2G43760_ID2	AT2G43760.3	WT_24h	WT_3h
AT2G44280	Major facilitator superfamily protein;(source:Araport11)	NA	A3	AT2G44280_P1	AT2G44280_P4	WT_24h	WT_3h
AT2G44280	Major facilitator superfamily protein;(source:Araport11)	NA	A5	AT2G44280_P1	AT2G44280_P4	WT_24h	WT_3h
AT2G44280	Major facilitator superfamily protein;(source:Araport11)	NA	A5	AT2G44280_P2	AT2G44280_P4	WT_24h	WT_3h
AT2G44280	Major facilitator superfamily protein;(source:Araport11)	NA	IR	AT2G44280_P1	AT2G44280_P4	WT_24h	WT_3h
AT2G45690	Encodes a protein with similarity to yeast Pep16p, a membrane localized protein involved in peroxisome assembly and protein-trafficking. SSE1 mutant seeds do not accumulate oils and dessicated seeds have a shrunken appearance. Involved in protein and oil body biogenesis. SSE is expressed during seed development, reaching the highest peak in mature siliques. Expression in leaves and roots is low c…	ATPEX16,PEX16,SSE,SSE1	A5	AT2G45690_P1	AT2G45690_s1	WT_24h	WT_3h
AT2G45870	Encodes a bestrophin-like protein (Best2). Minor isoform (10% transcript of AtBest1). Putative chloride ion channel. Proposed to modulate proton motive force partitioning by mediating chloride ion influx in the thylakoid lumen.	VCCN2	IR	AT2G45870_P1	AT2G45870_P2	WT_24h	WT_3h
AT2G45870	Encodes a bestrophin-like protein (Best2). Minor isoform (10% transcript of AtBest1). Putative chloride ion channel. Proposed to modulate proton motive force partitioning by mediating chloride ion influx in the thylakoid lumen.	VCCN2	IR	AT2G45870_P1	AT2G45870_P3	WT_24h	WT_3h
AT2G46470	inner membrane protein OXA1-like protein;(source:Araport11)	OXA1b,OXA1L	IR	AT2G46470_ID3	AT2G46470_P1	WT_24h	WT_3h
AT2G46790	Pseudo-response regulator PRR9. Involved in clock function. PRR7 and PRR9 are partially redundant essential components of a temperature-sensitive circadian system. CCA1 and LHY had a positive effect on PRR9. Interact with TOC1 in a yeast two-hybrid assay. Acts as transcriptional repressor of CCA1 and LHY. Acts additively with EC, PRR5 and PRR7 to regulate hypocotyl growth under photoperiodic cond…	APRR9,PRR9,TL1	IR	AT2G46790_P3	AT2G46790_P1	WT_24h	WT_3h
AT2G46790	Pseudo-response regulator PRR9. Involved in clock function. PRR7 and PRR9 are partially redundant essential components of a temperature-sensitive circadian system. CCA1 and LHY had a positive effect on PRR9. Interact with TOC1 in a yeast two-hybrid assay. Acts as transcriptional repressor of CCA1 and LHY. Acts additively with EC, PRR5 and PRR7 to regulate hypocotyl growth under photoperiodic cond…	APRR9,PRR9,TL1	A5	AT2G46790_P3	AT2G46790_P5	WT_24h	WT_3h
AT2G46830	Encodes a transcriptional repressor that performs overlapping functions with LHY in a regulatory feedback loop that is closely associated with the circadian oscillator of Arabidopsis. Binds to the evening element in the promoter of TOC1 and represses TOC1 transcription. CCA1 and LHY colocalize in the nucleus and form heterodimers in vivo. CCA1 and LHY function synergistically in regulating circad…	AtCCA1,CCA1	A5	AT2G46830_P1	AT2G46830_JC2	WT_24h	WT_3h
AT2G46830	Encodes a transcriptional repressor that performs overlapping functions with LHY in a regulatory feedback loop that is closely associated with the circadian oscillator of Arabidopsis. Binds to the evening element in the promoter of TOC1 and represses TOC1 transcription. CCA1 and LHY colocalize in the nucleus and form heterodimers in vivo. CCA1 and LHY function synergistically in regulating circad…	AtCCA1,CCA1	IR	AT2G46830_P1	AT2G46830_JC2	WT_24h	WT_3h
AT2G46830	Encodes a transcriptional repressor that performs overlapping functions with LHY in a regulatory feedback loop that is closely associated with the circadian oscillator of Arabidopsis. Binds to the evening element in the promoter of TOC1 and represses TOC1 transcription. CCA1 and LHY colocalize in the nucleus and form heterodimers in vivo. CCA1 and LHY function synergistically in regulating circad…	AtCCA1,CCA1	A3	AT2G46830_P1	AT2G46830_JC6	WT_24h	WT_3h
AT2G46920	Pol mutations are recessive, partial suppressors of meristem defects in strong clv1 and clv3 mutants, and nearly complete suppressors of weak clv1 mutants. Single mutants appear normal. Acts downstream of the CLV signaling pathway in meristem development and is required together with PLL1 for stem-cell maintenance through the regulation of WUS.	POL	A3	AT2G46920_ID5	AT2G46920_P1	WT_24h	WT_3h
AT2G46920	Pol mutations are recessive, partial suppressors of meristem defects in strong clv1 and clv3 mutants, and nearly complete suppressors of weak clv1 mutants. Single mutants appear normal. Acts downstream of the CLV signaling pathway in meristem development and is required together with PLL1 for stem-cell maintenance through the regulation of WUS.	POL	IR	AT2G46920_ID5	AT2G46920_P1	WT_24h	WT_3h
AT2G47450	A component of the chloroplast signal recognition particle pathway that is involved in LHCP targeting. It is downregulated in response to high light. It recognizes the DPLG motif in Lhcb1. The mRNA is cell-to-cell mobile.	CAO,CPSRP43	IR	AT2G47450_P1	AT2G47450_s1	WT_24h	WT_3h
AT2G47470	Encodes a protein disulfide isomerase-like (PDIL) protein, a member of a multigene family within the thioredoxin (TRX) superfamily. Transcript levels for this gene are up-regulated in response to three different chemical inducers of ER stress (dithiothreitol, beta-mercaptoethanol, and tunicamycin). AtIRE1-2 does not appear to be required for this response, but the atbzip60 mutant has a diminished…	ATPDI11,ATPDIL2-1,MEE30,PDI11,UNE5	A3	AT2G47470_P1	AT2G47470.4	WT_24h	WT_3h
AT2G47470	Encodes a protein disulfide isomerase-like (PDIL) protein, a member of a multigene family within the thioredoxin (TRX) superfamily. Transcript levels for this gene are up-regulated in response to three different chemical inducers of ER stress (dithiothreitol, beta-mercaptoethanol, and tunicamycin). AtIRE1-2 does not appear to be required for this response, but the atbzip60 mutant has a diminished…	ATPDI11,ATPDIL2-1,MEE30,PDI11,UNE5	A5	AT2G47470_P1	AT2G47470.4	WT_24h	WT_3h
AT3G01040	Encodes a protein with putative galacturonosyltransferase activity.	GAUT13	IR	AT3G01040_P3	AT3G01040_c1	WT_24h	WT_3h
AT3G01120	encodes a cystathionine gamma-synthase, which performs the first committed step in methionine biosynthesis. A conserved motif of 13 amino acids in the first exon is required for posttranscriptional autoregulation. This enzyme shares the same substrate as threonine synthase (TS) and its absence transcriptionally affects 8 genes in the genome.	AtCGS1,AtCYS1,CGS,CGS1,MTO1	IR	AT3G01120_P1	AT3G01120_c1	WT_24h	WT_3h
AT3G01150	Encodes one of the two polypyrimidine tract-binding (PTB) protein homologs in the Arabidopsis genome. Double mutants have defects in pollen germination.	ATPTB1,PTB1	ES	AT3G01150.1	AT3G01150_c2	WT_24h	WT_3h
AT3G01210	ACD11 binding partner, may be involved in negative regulation of ROS-mediated defense response.	NA	A5	AT3G01210_c1	AT3G01210_P1	WT_24h	WT_3h
AT3G01210	ACD11 binding partner, may be involved in negative regulation of ROS-mediated defense response.	NA	IR	AT3G01210_c1	AT3G01210_P1	WT_24h	WT_3h
AT3G01210	ACD11 binding partner, may be involved in negative regulation of ROS-mediated defense response.	NA	A5	AT3G01210_ID2	AT3G01210_P2	WT_24h	WT_3h
AT3G01210	ACD11 binding partner, may be involved in negative regulation of ROS-mediated defense response.	NA	IR	AT3G01210_c1	AT3G01210_P2	WT_24h	WT_3h
AT3G01210	ACD11 binding partner, may be involved in negative regulation of ROS-mediated defense response.	NA	IR	AT3G01210_ID2	AT3G01210_P2	WT_24h	WT_3h
AT3G01280	Encodes a voltage-dependent anion channel (VDAC: AT3G01280/VDAC1, AT5G67500/VDAC2, AT5G15090/VDAC3, AT5G57490/VDAC4, AT5G15090/VDAC5). VDACs are reported to be porin-type, beta-barrel diffusion pores. They are prominently localized in the outer mitochondrial membrane and are involved in metabolite exchange between the organelle and the cytosol. The mRNA is cell-to-cell mobile.	ATVDAC1,VDAC1	A3	AT3G01280_ID8	AT3G01280.1	WT_24h	WT_3h
AT3G01280	Encodes a voltage-dependent anion channel (VDAC: AT3G01280/VDAC1, AT5G67500/VDAC2, AT5G15090/VDAC3, AT5G57490/VDAC4, AT5G15090/VDAC5). VDACs are reported to be porin-type, beta-barrel diffusion pores. They are prominently localized in the outer mitochondrial membrane and are involved in metabolite exchange between the organelle and the cytosol. The mRNA is cell-to-cell mobile.	ATVDAC1,VDAC1	ES	AT3G01280_ID8	AT3G01280.1	WT_24h	WT_3h
AT3G01480	Encodes a chloroplast cyclophilin functioning in the assembly and maintenance of photosystem II (PSII) supercomplexes. The mRNA is cell-to-cell mobile.	ATCYP38,CYP38	A3	AT3G01480_c1	AT3G01480_P1	WT_24h	WT_3h
AT3G01500	Encodes a putative beta-carbonic anhydrase betaCA1. Together with betaCA4 (At1g70410) regulates CO2-controlled stomatal movements in guard cells, as well as attenuates immunity. Differential CA gene expression in response to changing atmospheric CO2 conditions contribute to altered disease resistance levels. Activated by OXS2 under the treatment of salt.	ATBCA1,ATSABP3,CA1,SABP3	IR	AT3G01500_ID11	AT3G01500.2	WT_24h	WT_3h
AT3G01540	RNA HELICASE DRH1	ATDRH1,DRH1,RH14	A3	AT3G01540_c4	AT3G01540.4	WT_24h	WT_3h
AT3G01540	RNA HELICASE DRH1	ATDRH1,DRH1,RH14	A3	AT3G01540_c4	AT3G01540_s9	WT_24h	WT_3h
AT3G01540	RNA HELICASE DRH1	ATDRH1,DRH1,RH14	IR	AT3G01540_c4	AT3G01540_s9	WT_24h	WT_3h
AT3G01920	DHBP synthase RibB-like alpha/beta domain-containing protein;(source:Araport11)	NA	IR	AT3G01920_ID2	AT3G01920.1	WT_24h	WT_3h
AT3G03340	LUC7 related protein;(source:Araport11)	LUC7A,UNE6	ES	AT3G03340_ID1	AT3G03340.1	WT_24h	WT_3h
AT3G03340	LUC7 related protein;(source:Araport11)	LUC7A,UNE6	A5	AT3G03340_ID1	AT3G03340_JS3	WT_24h	WT_3h
AT3G03340	LUC7 related protein;(source:Araport11)	LUC7A,UNE6	A5	AT3G03340_P3	AT3G03340_JS3	WT_24h	WT_3h
AT3G03340	LUC7 related protein;(source:Araport11)	LUC7A,UNE6	ES	AT3G03340_P3	AT3G03340_JS3	WT_24h	WT_3h
AT3G03340	LUC7 related protein;(source:Araport11)	LUC7A,UNE6	IR	AT3G03340_P3	AT3G03340_JS3	WT_24h	WT_3h
AT3G03360	F-box/RNI-like superfamily protein;(source:Araport11)	NA	IR	AT3G03360.1	AT3G03360_ID2	WT_24h	WT_3h
AT3G04260	PEP complex component.	PDE324,PTAC3	A3	AT3G04260_P1	AT3G04260_c1	WT_24h	WT_3h
AT3G04460	RING finger protein involved in peroxisome biogenesis. Also involved in peroxisomal import of nitric oxide synthase. Has been demonstrated to have E3 ubiquitin ligase activity.	APM4,ATPEX12,PEX12	A5	AT3G04460_P1	AT3G04460_ID2	WT_24h	WT_3h
AT3G04630	Member of a small gene family which have a KLEEK domain which may be involved in protein- protein interactions. Over expression of WDL1 results in abnormal root development.	WDL1	IR	AT3G04630.1	AT3G04630_P3	WT_24h	WT_3h
AT3G05270	Encodes a protein that localizes at motile vesicle-like small compartments in differentiating xylem cells that is associated with microtubule plus-ends. VETH-positive compartments are unlikely to be elements in conventional endomembrane trafficking pathways. It can associate with COG2, and together these two proteins co-localize with the EXO70A1 exocyst subunit, tethering EXO70A1 to compartments …	VETH1	A3	AT3G05270_P1	AT3G05270_P2	WT_24h	WT_3h
AT3G05380	ALWAYS EARLY 2;(source:Araport11)	ALY2,ATALY2	A5	AT3G05380_P3	AT3G05380.5	WT_24h	WT_3h
AT3G05380	ALWAYS EARLY 2;(source:Araport11)	ALY2,ATALY2	IR	AT3G05380_P3	AT3G05380.5	WT_24h	WT_3h
AT3G05600	Encodes a cytosolic epoxide hydrolase capable of acting on 9,10-epoxystearic acid and on 12,13- epoxyoctadec-9-enoic acid that is involved in the synthesis of poly-hydroxylated cutin monomers.	AtEH1	IR	AT3G05600_P2	AT3G05600_P1	WT_24h	WT_3h
AT3G05910	Pectinacetylesterase family protein;(source:Araport11)	AtPAE12	ES	AT3G05910_P1	AT3G05910_ID2	WT_24h	WT_3h
AT3G06080	Encodes a member of the TBL (TRICHOME BIREFRINGENCE-LIKE) gene family containing a plant-specific DUF231 (domain of unknown function) domain. TBL gene family has 46 members, two of which (TBR/AT5G06700 and TBL3/AT5G01360) have been shown to be involved in the synthesis and deposition of secondary wall cellulose, presumably by influencing the esterification state of pectic polymers. A nomenclature…	TBL10	IR	AT3G06080_P1	AT3G06080_P2	WT_24h	WT_3h
AT3G06290	Encodes a component of the conserved TREX-2 complex that couples mRNA transcription with nucleo-cytoplasmic export, that is required for prevention of epigenetic gene silencing and has additional roles in regulating siRNAs and DNA methylation.	AtSAC3B,SAC3B	A3	AT3G06290_JS21	AT3G06290_JS12	WT_24h	WT_3h
AT3G06380	Member of plant TLP family which differs in having an F box domain. Interacts with ASK proteins.Plasma membrane tethering is mediated by PIP2 binding domain. Mutants are insensitive to ABA. May act redundantly with its paralog TPL3.	ATTLP9,TLP9	IR	AT3G06380_P1	AT3G06380_ID3	WT_24h	WT_3h
AT3G06778	Chaperone DnaJ-domain superfamily protein;(source:Araport11)	NA	A3	AT3G06778_c1	AT3G06778_ID9	WT_24h	WT_3h
AT3G06778	Chaperone DnaJ-domain superfamily protein;(source:Araport11)	NA	A3	AT3G06778_c1	AT3G06778_P1	WT_24h	WT_3h
AT3G06778	Chaperone DnaJ-domain superfamily protein;(source:Araport11)	NA	IR	AT3G06778_c1	AT3G06778_P1	WT_24h	WT_3h
AT3G07090	Interacts with C3H59 via its WD40 domain and C-terminal region, respectively, in the nucleus.	NA	IR	AT3G07090_P1	AT3G07090_ID8	WT_24h	WT_3h
AT3G07200	RING/U-box superfamily protein;(source:Araport11)	NA	A3	AT3G07200_P1	AT3G07200_ID2	WT_24h	WT_3h
AT3G07200	RING/U-box superfamily protein;(source:Araport11)	NA	A3	AT3G07200_P1	AT3G07200_JS1	WT_24h	WT_3h
AT3G07690	6-phosphogluconate dehydrogenase family protein;(source:Araport11)	NA	A3	AT3G07690_P1	AT3G07690_ID4	WT_24h	WT_3h
AT3G07690	6-phosphogluconate dehydrogenase family protein;(source:Araport11)	NA	IR	AT3G07690_P1	AT3G07690_ID4	WT_24h	WT_3h
AT3G08510	Phosphoinositide-specific phospholipase C (PI-PLC), catalyzes hydrolysis of phosphatidylinositol 4,5-bisphosphate into inositol 1,4,5-trisphosphate and diacylglycerol. It is involved in auxin biosynthesis and signaling, modulating development of both male and female gametophytes. It also regulates MAMP-triggered immunity by modulating ROS production.	ATPLC2,PLC2	IR	AT3G08510_P1	AT3G08510.2	WT_24h	WT_3h
AT3G08510	Phosphoinositide-specific phospholipase C (PI-PLC), catalyzes hydrolysis of phosphatidylinositol 4,5-bisphosphate into inositol 1,4,5-trisphosphate and diacylglycerol. It is involved in auxin biosynthesis and signaling, modulating development of both male and female gametophytes. It also regulates MAMP-triggered immunity by modulating ROS production.	ATPLC2,PLC2	A3	AT3G08510_P1	AT3G08510_ID1	WT_24h	WT_3h
AT3G08510	Phosphoinositide-specific phospholipase C (PI-PLC), catalyzes hydrolysis of phosphatidylinositol 4,5-bisphosphate into inositol 1,4,5-trisphosphate and diacylglycerol. It is involved in auxin biosynthesis and signaling, modulating development of both male and female gametophytes. It also regulates MAMP-triggered immunity by modulating ROS production.	ATPLC2,PLC2	A5	AT3G08510_P1	AT3G08510_ID1	WT_24h	WT_3h
AT3G08510	Phosphoinositide-specific phospholipase C (PI-PLC), catalyzes hydrolysis of phosphatidylinositol 4,5-bisphosphate into inositol 1,4,5-trisphosphate and diacylglycerol. It is involved in auxin biosynthesis and signaling, modulating development of both male and female gametophytes. It also regulates MAMP-triggered immunity by modulating ROS production.	ATPLC2,PLC2	ES	AT3G08510_P1	AT3G08510_ID1	WT_24h	WT_3h
AT3G08710	Associated to plasma membrane. Moves cell to cell, suggesting a role in intercellular communication. The redox reaction between oxidized AtGPX3 and reduced AtTRXh9 is realized through the forming and breaking of disulfide bonds via the active sites of Cys4 and Cys57 in AtTRXh9.	ATH9,TH9,TRX_H9	A5	AT3G08710_P1	AT3G08710_P2	WT_24h	WT_3h
AT3G10060	FKBP-like peptidyl-prolyl cis-trans isomerase family protein;(source:Araport11)	NA	A3	AT3G10060_s1	AT3G10060_JC1	WT_24h	WT_3h
AT3G10060	FKBP-like peptidyl-prolyl cis-trans isomerase family protein;(source:Araport11)	NA	A5	AT3G10060_s1	AT3G10060_P1	WT_24h	WT_3h
AT3G12915	Ribosomal protein S5/Elongation factor G/III/V family protein;(source:Araport11)	NA	IR	AT3G12915_JS7	AT3G12915_JS3	WT_24h	WT_3h
AT3G13225	WW domain-containing protein;(source:Araport11)	FNBP4	IR	AT3G13225_ID2	AT3G13225_P1	WT_24h	WT_3h
AT3G13530	MAP3K epsilon protein kinase 1 is functionally redundant with MAP3Ke2. Required for pollen development but not essential. map3ke1;map3ke2 double-mutant pollen grains develop plasma membrane irregularities following pollen mitosis I. Localized primarily in the plasma membrane. Expressed in leaf trichomes, root columella cells and developing ovules.	MAP3KE1,MAPKKK7	A3	AT3G13530.1	AT3G13530_s2	WT_24h	WT_3h
AT3G13530	MAP3K epsilon protein kinase 1 is functionally redundant with MAP3Ke2. Required for pollen development but not essential. map3ke1;map3ke2 double-mutant pollen grains develop plasma membrane irregularities following pollen mitosis I. Localized primarily in the plasma membrane. Expressed in leaf trichomes, root columella cells and developing ovules.	MAP3KE1,MAPKKK7	IR	AT3G13530.1	AT3G13530_s2	WT_24h	WT_3h
AT3G14870	hypothetical protein (DUF641);(source:Araport11)	NA	ES	AT3G14870_s1	AT3G14870_P2	WT_24h	WT_3h
AT3G14930	Uroporphyrinogen decarboxylase;(source:Araport11)	HEME1	IR	AT3G14930_P2	AT3G14930_P1	WT_24h	WT_3h
AT3G15190	chloroplast 30S ribosomal protein S20;(source:Araport11)	PRPS20	A3	AT3G15190_P1	AT3G15190_ID1	WT_24h	WT_3h
AT3G15190	chloroplast 30S ribosomal protein S20;(source:Araport11)	PRPS20	A5	AT3G15190_P1	AT3G15190_ID1	WT_24h	WT_3h
AT3G15220	Protein kinase superfamily protein;(source:Araport11)	NA	A3	AT3G15220_JS11	AT3G15220_c6	WT_24h	WT_3h
AT3G15351	P53/DNA damage-regulated protein;(source:Araport11)	NA	ES	AT3G15351_P6	AT3G15351_P2	WT_24h	WT_3h
AT3G15351	P53/DNA damage-regulated protein;(source:Araport11)	NA	IR	AT3G15351_P1	AT3G15351_P2	WT_24h	WT_3h
AT3G15351	P53/DNA damage-regulated protein;(source:Araport11)	NA	IR	AT3G15351_P6	AT3G15351_P2	WT_24h	WT_3h
AT3G15351	P53/DNA damage-regulated protein;(source:Araport11)	NA	IR	AT3G15351_P7	AT3G15351_P2	WT_24h	WT_3h
AT3G15430	Regulator of chromosome condensation (RCC1) family protein;(source:Araport11)	NA	A3	AT3G15430_P2	AT3G15430_P3	WT_24h	WT_3h
AT3G15430	Regulator of chromosome condensation (RCC1) family protein;(source:Araport11)	NA	A5	AT3G15430_P2	AT3G15430_P3	WT_24h	WT_3h
AT3G15430	Regulator of chromosome condensation (RCC1) family protein;(source:Araport11)	NA	IR	AT3G15430_P2	AT3G15430_P3	WT_24h	WT_3h
AT3G15520	Cyclophilin-like peptidyl-prolyl cis-trans isomerase family protein;(source:Araport11)	NA	A3	AT3G15520_s2	AT3G15520.1	WT_24h	WT_3h
AT3G15520	Cyclophilin-like peptidyl-prolyl cis-trans isomerase family protein;(source:Araport11)	NA	A5	AT3G15520_s2	AT3G15520.1	WT_24h	WT_3h
AT3G15520	Cyclophilin-like peptidyl-prolyl cis-trans isomerase family protein;(source:Araport11)	NA	IR	AT3G15520_s2	AT3G15520.1	WT_24h	WT_3h
AT3G15730	Encodes phospholipase D alpha 1 (PLD alpha 1). Positive regulator of abscisic acid (ABA) mediated stomatal movements. PLD alpha 1 plays an important role in seed deterioration and aging in Arabidopsis. The mRNA is cell-to-cell mobile.	PLD,PLDALPHA1	IR	AT3G15730_P1	AT3G15730_s1	WT_24h	WT_3h
AT3G15770	hypothetical protein;(source:Araport11)	NA	IR	AT3G15770_P1	AT3G15770_ID1	WT_24h	WT_3h
AT3G15770	hypothetical protein;(source:Araport11)	NA	A3	AT3G15770_P1	AT3G15770_ID4	WT_24h	WT_3h
AT3G15770	hypothetical protein;(source:Araport11)	NA	IR	AT3G15770_P1	AT3G15770_ID4	WT_24h	WT_3h
AT3G15950	Similar to TSK-associating protein 1 (TSA1), contains 10 EFE repeats, a novel repeat sequence unique to plants. Expressed preferentially in the roots.Protein is localized to ER bodies- an endoplasmic reticulum derived structure. Loss of function mutations lack ER bodies.	NAI2	MES	AT3G15950_P1	AT3G15950_ID510	WT_24h	WT_3h
AT3G16400	Encodes a nitrile-specifier protein NSP1 responsible for constitutive and herbivore-induced simple nitrile formation in rosette leaves. NSP1 is one out of five (At3g16400/NSP1, At2g33070/NSP2, At3g16390/NSP3, At3g16410/NSP4 and At5g48180/NSP5) A. thaliana epithiospecifier protein (ESP) homologues that promote simple nitrile, but not epithionitrile or thiocyanate formation. The mRNA is cell-to-cel…	ATMLP-470,ATNSP1,NSP1	IR	AT3G16400.2	AT3G16400_P1	WT_24h	WT_3h
AT3G16520	UDP-glucosyl transferase 88A1;(source:Araport11)	UGT88A1	A3	AT3G16520_P3	AT3G16520.1	WT_24h	WT_3h
AT3G16520	UDP-glucosyl transferase 88A1;(source:Araport11)	UGT88A1	IR	AT3G16520_P3	AT3G16520.1	WT_24h	WT_3h
AT3G17100	sequence-specific DNA binding transcription factor;(source:Araport11)	AIF3	IR	AT3G17100_P1	AT3G17100_P2	WT_24h	WT_3h
AT3G17120	transmembrane protein;(source:Araport11)	NA	A3	AT3G17120_P2	AT3G17120_P1	WT_24h	WT_3h
AT3G17120	transmembrane protein;(source:Araport11)	NA	ES	AT3G17120_P2	AT3G17120_P1	WT_24h	WT_3h
AT3G17609	Encodes a homolog of HY5 (HYH). Involved in phyB signaling pathway.	HYH	A3	AT3G17609_P4	AT3G17609_P2	WT_24h	WT_3h
AT3G19370	filament-like protein (DUF869);(source:Araport11)	NA	A5	AT3G19370_P1	AT3G19370_JS2	WT_24h	WT_3h
AT3G19370	filament-like protein (DUF869);(source:Araport11)	NA	IR	AT3G19370_P1	AT3G19370_JS2	WT_24h	WT_3h
AT3G19800	Encodes the DUF177B version of the two DUF177 proteins in Arabidopsis. This version differs from DUF177A in containing a 23 aa insertion compared to the DUF177A sequence.	DUF177B	A3	AT3G19800_c1	AT3G19800.2	WT_24h	WT_3h
AT3G19850	Phototropic-responsive NPH3 family protein;(source:Araport11)	NA	IR	AT3G19850_JC5	AT3G19850_s1	WT_24h	WT_3h
AT3G19850	Phototropic-responsive NPH3 family protein;(source:Araport11)	NA	IR	AT3G19850_P1	AT3G19850_s1	WT_24h	WT_3h
AT3G20270	Encodes one of the two LBP/BPI related proteins (AT1G04970/LBR-1, AT3G20270/LBR-2) that bind to LPS directly and regulate PR1 expression.	LBR-2	A3	AT3G20270_c1	AT3G20270_JC2	WT_24h	WT_3h
AT3G22120	Cell wall-plasma membrane linker protein homolog (CWLP)	CWLP	A3	AT3G22120_ID4	AT3G22120_ID1	WT_24h	WT_3h
AT3G22460	Encodes a member of a family of genes with O-acetylserine(thiol)lyase activity.	OASA2	A3	AT3G22460_ID14	AT3G22460_ID4	WT_24h	WT_3h
AT3G22460	Encodes a member of a family of genes with O-acetylserine(thiol)lyase activity.	OASA2	IR	AT3G22460_ID2	AT3G22460_ID4	WT_24h	WT_3h
AT3G23090	Member of the microtubule regulatory protein WVD2/WDL family WDL3 stabilizes cortical microtubules and is involved in light induced hypocotyl elongation. WDL3 is ubiquinated by COP1, leading to its degadation in the dark,	WDL3	A5	AT3G23090_P3	AT3G23090_P4	WT_24h	WT_3h
AT3G23450	Kratos restricts cell death during differentiation of tracheary elements.	NA	A3	AT3G23450_P1	AT3G23450_P2	WT_24h	WT_3h
AT3G23450	Kratos restricts cell death during differentiation of tracheary elements.	NA	IR	AT3G23450_P1	AT3G23450_P2	WT_24h	WT_3h
AT3G23450	Kratos restricts cell death during differentiation of tracheary elements.	NA	A5	AT3G23450_P1	AT3G23450_P3	WT_24h	WT_3h
AT3G23450	Kratos restricts cell death during differentiation of tracheary elements.	NA	IR	AT3G23450_P1	AT3G23450_P3	WT_24h	WT_3h
AT3G23610	Encodes a dual specificity protein phosphatase whose activity is modulated by CaM binding.	DSPTP1	IR	AT3G23610_P2	AT3G23610_P6	WT_24h	WT_3h
AT3G23990	mitochondrial chaperonin HSP. assist in rapid assembly of the oligomeric protein structures in the mitochondria.	HSP60,HSP60-3B	A5	AT3G23990_P1	AT3G23990_ID2	WT_24h	WT_3h
AT3G23990	mitochondrial chaperonin HSP. assist in rapid assembly of the oligomeric protein structures in the mitochondria.	HSP60,HSP60-3B	MES	AT3G23990_P1	AT3G23990_ID2	WT_24h	WT_3h
AT3G25480	Rhodanese/Cell cycle control phosphatase superfamily protein;(source:Araport11)	NA	A3	AT3G25480_ID2	AT3G25480.1	WT_24h	WT_3h
AT3G25740	Encodes a plastid localized methionine aminopeptidase. Formerly called MAP1C, now called MAP1B.	MAP1B,MAP1C	A3	AT3G25740_ID31	AT3G25740_P2	WT_24h	WT_3h
AT3G25740	Encodes a plastid localized methionine aminopeptidase. Formerly called MAP1C, now called MAP1B.	MAP1B,MAP1C	A5	AT3G25740_ID31	AT3G25740_P2	WT_24h	WT_3h
AT3G25740	Encodes a plastid localized methionine aminopeptidase. Formerly called MAP1C, now called MAP1B.	MAP1B,MAP1C	A5	AT3G25740_ID29	AT3G25740_P2	WT_24h	WT_3h
AT3G25740	Encodes a plastid localized methionine aminopeptidase. Formerly called MAP1C, now called MAP1B.	MAP1B,MAP1C	IR	AT3G25740_ID31	AT3G25740_P2	WT_24h	WT_3h
AT3G25740	Encodes a plastid localized methionine aminopeptidase. Formerly called MAP1C, now called MAP1B.	MAP1B,MAP1C	IR	AT3G25740_ID29	AT3G25740_P2	WT_24h	WT_3h
AT3G26115	Pyridoxal-5-phosphate-dependent enzyme family protein;(source:Araport11)	NA	IR	AT3G26115_P5	AT3G26115_JS3	WT_24h	WT_3h
AT3G26115	Pyridoxal-5-phosphate-dependent enzyme family protein;(source:Araport11)	NA	A3	AT3G26115_P5	AT3G26115_P3	WT_24h	WT_3h
AT3G26115	Pyridoxal-5-phosphate-dependent enzyme family protein;(source:Araport11)	NA	A5	AT3G26115_P5	AT3G26115_P3	WT_24h	WT_3h
AT3G26115	Pyridoxal-5-phosphate-dependent enzyme family protein;(source:Araport11)	NA	IR	AT3G26115_P5	AT3G26115_P3	WT_24h	WT_3h
AT3G26180	putative cytochrome P450	CYP71B20	IR	AT3G26180_P1	AT3G26180_ID4	WT_24h	WT_3h
AT3G26240	Cysteine/Histidine-rich C1 domain family protein. Accumulation of this protein is regulated by a cis-Natural Antisense RNA (cis-NAT).	NA	IR	AT3G26240_P1	AT3G26240_s1	WT_24h	WT_3h
AT3G26720	Glycosyl hydrolase family 38 protein;(source:Araport11)	NA	A3	AT3G26720_P1	AT3G26720.2	WT_24h	WT_3h
AT3G26890	meiosis chromosome segregation family protein;(source:Araport11)	NA	A5	AT3G26890_P8	AT3G26890.4	WT_24h	WT_3h
AT3G26890	meiosis chromosome segregation family protein;(source:Araport11)	NA	ES	AT3G26890_P8	AT3G26890.4	WT_24h	WT_3h
AT3G26890	meiosis chromosome segregation family protein;(source:Araport11)	NA	IR	AT3G26890_P8	AT3G26890.4	WT_24h	WT_3h
AT3G27330	zinc finger (C3HC4-type RING finger) family protein;(source:Araport11)	NA	ES	AT3G27330_P1	AT3G27330_s1	WT_24h	WT_3h
AT3G27580	D6PK family kinase involved in pulse-induced phototropism but also for time-dependent second positive phototropism, and continuous light-induced hypocotyl phototropism.D6PKL3 is polarly localized within the plasma membrane. It is involved in pollen aperture formation. The protein is localized within distinct regions of the pollen plasma membrane and mutants are also defective in pollen aperture f…	ATPK7,D6PKL3	IR	AT3G27580_P1	AT3G27580_P2	WT_24h	WT_3h
AT3G27925	Encodes a DegP protease; nuclear gene encoding chloroplast-targeted protease that can degrade two lumenal proteins, plastocyanin and OE33, suggesting a role as a general-purpose protease in the thylakoid lumen. Involved in the degradation of D1 protein of PS II, hence participating in the repair of PS II damages caused by photoinhibition. The mRNA is cell-to-cell mobile.	DEG1,DEGP1	IR	AT3G27925_P1	AT3G27925_P2	WT_24h	WT_3h
AT3G29100	Encodes a member of the Arabidopsis v-SNARE (vesicle soluble NSF attachment protein receptor) family that has 3 members: VTI11, VTI12, and VTI13. This gene is not expressed at levels detectable by RT-PCR. However, one EST corresponding to this gene has been isolated.	ATVTI13,VTI13	ES	AT3G29100_s3	AT3G29100_P1	WT_24h	WT_3h
AT3G29100	Encodes a member of the Arabidopsis v-SNARE (vesicle soluble NSF attachment protein receptor) family that has 3 members: VTI11, VTI12, and VTI13. This gene is not expressed at levels detectable by RT-PCR. However, one EST corresponding to this gene has been isolated.	ATVTI13,VTI13	IR	AT3G29100_s3	AT3G29100_P1	WT_24h	WT_3h
AT3G29100	Encodes a member of the Arabidopsis v-SNARE (vesicle soluble NSF attachment protein receptor) family that has 3 members: VTI11, VTI12, and VTI13. This gene is not expressed at levels detectable by RT-PCR. However, one EST corresponding to this gene has been isolated.	ATVTI13,VTI13	IR	AT3G29100_P2	AT3G29100_P1	WT_24h	WT_3h
AT3G29100	Encodes a member of the Arabidopsis v-SNARE (vesicle soluble NSF attachment protein receptor) family that has 3 members: VTI11, VTI12, and VTI13. This gene is not expressed at levels detectable by RT-PCR. However, one EST corresponding to this gene has been isolated.	ATVTI13,VTI13	IR	AT3G29100_ID4	AT3G29100_P1	WT_24h	WT_3h
AT3G29240	PPR containing protein (DUF179);(source:Araport11)	NA	IR	AT3G29240.1	AT3G29240_P2	WT_24h	WT_3h
AT3G30390	Encodes a putative amino acid transporter.	NA	ES	AT3G30390_P2	AT3G30390_P1	WT_24h	WT_3h
AT3G30390	Encodes a putative amino acid transporter.	NA	IR	AT3G30390_P2	AT3G30390_P1	WT_24h	WT_3h
AT3G43720	Bifunctional inhibitor/lipid-transfer protein/seed storage 2S albumin superfamily protein;(source:Araport11)	LTPG2	A3	AT3G43720_P1	AT3G43720_ID1	WT_24h	WT_3h
AT3G44110	homologous to the co-chaperon DNAJ protein from E coli	ATJ,ATJ3,J3	IR	AT3G44110_P1	AT3G44110.2	WT_24h	WT_3h
AT3G44200	Encodes AtNek5, a member of the NIMA-related serine/threonine kinases (Neks) that have been linked to cell-cycle regulation in fungi and mammals. Plant Neks might be involved in plant development processes.Interacts physically with plant kinesins ARK1 and ARK2. Mutants show defects in root epidermal cell morphology, trichome branching and other epidermal cell abnormalities suggesting a rol e in e…	ATNEK6,IBO1,NEK6	IR	AT3G44200_P1	AT3G44200_s1	WT_24h	WT_3h
AT3G44730	kinesin-like protein 1;(source:Araport11)	AtKIN14h,ATKP1,KP1	IR	AT3G44730_P2	AT3G44730.1	WT_24h	WT_3h
AT3G46040	Regulated by TCP20. The mRNA is cell-to-cell mobile.	RPS15AD	A5	AT3G46040_P1	AT3G46040_c2	WT_24h	WT_3h
AT3G46040	Regulated by TCP20. The mRNA is cell-to-cell mobile.	RPS15AD	IR	AT3G46040_s1	AT3G46040_c2	WT_24h	WT_3h
AT3G46830	RAB GTPase homolog A2C;(source:Araport11)	ATRAB-A2C,ATRAB11A,ATRABA2C,RAB-A2C,RABA2c	A5	AT3G46830_P2	AT3G46830_P1	WT_24h	WT_3h
AT3G47010	Glycosyl hydrolase family protein;(source:Araport11)	NA	A3	AT3G47010_P1	AT3G47010.2	WT_24h	WT_3h
AT3G47010	Glycosyl hydrolase family protein;(source:Araport11)	NA	A5	AT3G47010_P1	AT3G47010.2	WT_24h	WT_3h
AT3G47500	Dof-type zinc finger domain-containing protein, identical to H-protein promoter binding factor-2a GI:3386546 from (Arabidopsis thaliana). Interacts with LKP2 and FKF1, but its overexpression does not change flowering time under short or long day conditions.	CDF3	IR	AT3G47500_P1	AT3G47500_c1	WT_24h	WT_3h
AT3G48115	other_RNA;(source:Araport11)	NA	IR	AT3G48115.1	AT3G48115_ID1	WT_24h	WT_3h
AT3G48330	Encodes protein-L-isoaspartate methyltransferase. Important for maintaining viability as the seed ages. Involved in germination.	ATPIMT1,PIMT1	IR	AT3G48330_P1	AT3G48330_ID3	WT_24h	WT_3h
AT3G48330	Encodes protein-L-isoaspartate methyltransferase. Important for maintaining viability as the seed ages. Involved in germination.	ATPIMT1,PIMT1	IR	AT3G48330_P1	AT3G48330_ID5	WT_24h	WT_3h
AT3G48360	Encodes a protein (BT2) that is an essential component of the TAC1-mediated telomerase activation pathway. Acts redundantly with BT3 and BT1 during female gametophyte development and with BT3 during male gametophyte development. BT2 also mediates multiple responses to nutrients, stresses, and hormones.	ATBT2,BT2	IR	AT3G48360_P1	AT3G48360_c1	WT_24h	WT_3h
AT3G48360	Encodes a protein (BT2) that is an essential component of the TAC1-mediated telomerase activation pathway. Acts redundantly with BT3 and BT1 during female gametophyte development and with BT3 during male gametophyte development. BT2 also mediates multiple responses to nutrients, stresses, and hormones.	ATBT2,BT2	IR	AT3G48360_P1	AT3G48360_P2	WT_24h	WT_3h
AT3G50370	hypothetical protein;(source:Araport11)	NA	IR	AT3G50370_P2	AT3G50370.1	WT_24h	WT_3h
AT3G51150	ATP binding microtubule motor family protein;(source:Araport11)	NA	A3	AT3G51150_P2	AT3G51150_P3	WT_24h	WT_3h
AT3G52100	RING/FYVE/PHD zinc finger-containing protein. Part of emdomembrane trafficking system.	NA	IR	AT3G52100_ID8	AT3G52100_ID7	WT_24h	WT_3h
AT3G52100	RING/FYVE/PHD zinc finger-containing protein. Part of emdomembrane trafficking system.	NA	IR	AT3G52100_ID8	AT3G52100_P2	WT_24h	WT_3h
AT3G52660	RNA-binding (RRM/RBD/RNP motifs) family protein;(source:Araport11)	NA	A3	AT3G52660_P1	AT3G52660_P3	WT_24h	WT_3h
AT3G52730	ubiquinol-cytochrome C reductase UQCRX/QCR9-like family protein;(source:Araport11)	NA	A5	AT3G52730_P1	AT3G52730_P2	WT_24h	WT_3h
AT3G52850	Encodes the Vacuolar Sorting Receptor-1 (VSR-1)/Epidermal Growth Factor Receptor-like protein1(VSR-1/ATELP1). Binds vacuolar targeting signals. Involved in sorting seed storage proteins into vacuoles. The mRNA is cell-to-cell mobile.	ATELP,ATELP1,ATVSR1,BP-80,BP80,BP80-11,BP80B,GFS1,VSR1,VSR11	IR	AT3G52850_P1	AT3G52850_JC1	WT_24h	WT_3h
AT3G53130	Lutein-deficient 1 (LUT1) required for lutein biosynthesis, member of the xanthophyll class of carotenoids. Involved in epsilon ring hydroxylation. Maps at 67.3 cM on chromosome 3.	CYP97C1,LUT1	IR	AT3G53130_JS1	AT3G53130_P1	WT_24h	WT_3h
AT3G54050	Encodes a chloroplastic fructose 1,6-bisphosphate phosphatase. also known as HCEF1 (High Cyclic Electron Flow 1). hcef1 mutants have constitutively elevated electron flow (CEFI) and plants with antisense suppression of this enzyme have higher levels of net leaf photosynthesis and increased sucrose biosynthesis. The mRNA is cell-to-cell mobile.	cfbp1,HCEF1	A5	AT3G54050_P1	AT3G54050_JC2	WT_24h	WT_3h
AT3G54050	Encodes a chloroplastic fructose 1,6-bisphosphate phosphatase. also known as HCEF1 (High Cyclic Electron Flow 1). hcef1 mutants have constitutively elevated electron flow (CEFI) and plants with antisense suppression of this enzyme have higher levels of net leaf photosynthesis and increased sucrose biosynthesis. The mRNA is cell-to-cell mobile.	cfbp1,HCEF1	IR	AT3G54050_P1	AT3G54050_JC2	WT_24h	WT_3h
AT3G54880	zinc finger protein;(source:Araport11)	NA	A3	AT3G54880_JC8	AT3G54880_ID4	WT_24h	WT_3h
AT3G54880	zinc finger protein;(source:Araport11)	NA	ES	AT3G54880_JC8	AT3G54880_ID4	WT_24h	WT_3h
AT3G55020	Ypt/Rab-GAP domain of gyp1p superfamily protein;(source:Araport11)	NA	A5	AT3G55020_P3	AT3G55020_ID5	WT_24h	WT_3h
AT3G55330	Facilitates the assembly of the photosystem II supercomplexes and optimizes plant pitness under fluctuating light.	PPL1	A3	AT3G55330_s1	AT3G55330_P1	WT_24h	WT_3h
AT3G55850	Encodes a product that might regulate nucleo-cytoplasmic trafficking of an intermediate(s) involved in phyA signal transduction. Differs from isoform 2 only in the first few N-terminal amino acids.	LAF3,LAF3_ISF1,LAF3_ISF2	A3	AT3G55850_P6	AT3G55850_P4	WT_24h	WT_3h
AT3G55850	Encodes a product that might regulate nucleo-cytoplasmic trafficking of an intermediate(s) involved in phyA signal transduction. Differs from isoform 2 only in the first few N-terminal amino acids.	LAF3,LAF3_ISF1,LAF3_ISF2	A5	AT3G55850_P6	AT3G55850_P4	WT_24h	WT_3h
AT3G55850	Encodes a product that might regulate nucleo-cytoplasmic trafficking of an intermediate(s) involved in phyA signal transduction. Differs from isoform 2 only in the first few N-terminal amino acids.	LAF3,LAF3_ISF1,LAF3_ISF2	IR	AT3G55850_P6	AT3G55850_P4	WT_24h	WT_3h
AT3G56050	Protein kinase family protein;(source:Araport11)	NA	IR	AT3G56050_P1	AT3G56050_P2	WT_24h	WT_3h
AT3G56300	Cysteinyl-tRNA synthetase, class Ia family protein;(source:Araport11)	NA	A3	AT3G56300_ID4	AT3G56300_ID1	WT_24h	WT_3h
AT3G56450	member of alpha-SNAP Gene Family	ALPHA-SNAP1	ES	AT3G56450_ID69	AT3G56450_ID61	WT_24h	WT_3h
AT3G56450	member of alpha-SNAP Gene Family	ALPHA-SNAP1	IR	AT3G56450_ID69	AT3G56450_ID61	WT_24h	WT_3h
AT3G56510	RNA-binding (RRM/RBD/RNP motifs) family protein;(source:Araport11)	NA	A3	AT3G56510.2	AT3G56510_P4	WT_24h	WT_3h
AT3G56510	RNA-binding (RRM/RBD/RNP motifs) family protein;(source:Araport11)	NA	ES	AT3G56510.2	AT3G56510_P4	WT_24h	WT_3h
AT3G56510	RNA-binding (RRM/RBD/RNP motifs) family protein;(source:Araport11)	NA	IR	AT3G56510.2	AT3G56510_P4	WT_24h	WT_3h
AT3G56650	thylakoid lumenal protein (Mog1/PsbP/DUF1795-like photosystem II reaction center PsbP family protein);(source:Araport11)	PPD6	A3	AT3G56650_ID1	AT3G56650.1	WT_24h	WT_3h
AT3G56680	Single-stranded nucleic acid binding R3H protein;(source:Araport11)	NA	A3	AT3G56680_P1	AT3G56680_ID2	WT_24h	WT_3h
AT3G56680	Single-stranded nucleic acid binding R3H protein;(source:Araport11)	NA	A5	AT3G56680_P1	AT3G56680_ID2	WT_24h	WT_3h
AT3G57040	response regulator ARR9, A two-component response regulator-like protein with a receiver domain with a conserved aspartate residue and a possible phosphorylation site and at the N-terminal half. Appears to interact with histidine kinase like genes ATHP3 and ATHP2	ARR9,ATRR4	IR	AT3G57040_P2	AT3G57040_ID1	WT_24h	WT_3h
AT3G57040	response regulator ARR9, A two-component response regulator-like protein with a receiver domain with a conserved aspartate residue and a possible phosphorylation site and at the N-terminal half. Appears to interact with histidine kinase like genes ATHP3 and ATHP2	ARR9,ATRR4	IR	AT3G57040_P2	AT3G57040_ID5	WT_24h	WT_3h
AT3G57060	Similar to mamalian condensin. Mutants have reduced fertility.	NA	A5	AT3G57060_P3	AT3G57060_c1	WT_24h	WT_3h
AT3G57170	N-acetylglucosaminyl transferase component family protein / Gpi1 family protein;(source:Araport11)	NA	A5	AT3G57170_P2	AT3G57170_s3	WT_24h	WT_3h
AT3G57170	N-acetylglucosaminyl transferase component family protein / Gpi1 family protein;(source:Araport11)	NA	IR	AT3G57170_P2	AT3G57170_s3	WT_24h	WT_3h
AT3G57380	Glycosyltransferase family 61 protein;(source:Araport11)	NA	IR	AT3G57380_ID4	AT3G57380_P1	WT_24h	WT_3h
AT3G58610	ketol-acid reductoisomerase;(source:Araport11)	NA	IR	AT3G58610_ID7	AT3G58610_ID9	WT_24h	WT_3h
AT3G58610	ketol-acid reductoisomerase;(source:Araport11)	NA	MES	AT3G58610_ID7	AT3G58610_ID9	WT_24h	WT_3h
AT3G58760	Integrin-linked protein kinase family;(source:Araport11)	NA	A5	AT3G58760_P2	AT3G58760_c1	WT_24h	WT_3h
AT3G59090	tobamovirus multiplication protein;(source:Araport11)	Cand3	IR	AT3G59090_P4	AT3G59090_P1	WT_24h	WT_3h
AT3G59410	Encodes an eIF2alpha kinase that can bind uncharged tRNA via its C-terminus and can phosphorylate both eIF2alpha homologues in Arabidopsis.	ATGCN2,GCN2	A3	AT3G59410_JC4	AT3G59410.1	WT_24h	WT_3h
AT3G59870	hypothetical protein;(source:Araport11)	NA	A3	AT3G59870_s1	AT3G59870_P1	WT_24h	WT_3h
AT3G59870	hypothetical protein;(source:Araport11)	NA	IR	AT3G59870_s1	AT3G59870_P1	WT_24h	WT_3h
AT3G60590	cytochrome P450 family protein;(source:Araport11)	NA	IR	AT3G60590_ID3	AT3G60590_ID6	WT_24h	WT_3h
AT3G61080	Protein kinase superfamily protein;(source:Araport11)	NA	A3	AT3G61080_ID3	AT3G61080.1	WT_24h	WT_3h
AT3G61160	Protein kinase superfamily protein;(source:Araport11)	NA	A5	AT3G61160_P2	AT3G61160_P1	WT_24h	WT_3h
AT3G61420	BSD domain (BTF2-like transcription factors, Synapse-associated proteins and DOS2-like proteins);(source:Araport11)	NA	A3	AT3G61420_P1	AT3G61420_JS25	WT_24h	WT_3h
AT3G62120	Encodes a cytosolic prolyl-tRNA synthetase.	AtProRS-Cyt,ProRS-Cyt	A5	AT3G62120.1	AT3G62120_ID7	WT_24h	WT_3h
AT3G62120	Encodes a cytosolic prolyl-tRNA synthetase.	AtProRS-Cyt,ProRS-Cyt	IR	AT3G62120.1	AT3G62120_P3	WT_24h	WT_3h
AT3G63140	Encodes a protein with ribonuclease activity that is involved in plastid rRNA maturation.	CSP41A	IR	AT3G63140_ID4	AT3G63140_P1	WT_24h	WT_3h
AT3G63370	Encodes a chloroplast RNA editing factor.	OTP86	IR	AT3G63370_c1	AT3G63370_P1	WT_24h	WT_3h
AT3G63510	FMN-linked oxidoreductases superfamily protein;(source:Araport11)	NA	A3	AT3G63510_s1	AT3G63510_ID43	WT_24h	WT_3h
AT3G63510	FMN-linked oxidoreductases superfamily protein;(source:Araport11)	NA	A3	AT3G63510_ID47	AT3G63510_ID43	WT_24h	WT_3h
AT3G63510	FMN-linked oxidoreductases superfamily protein;(source:Araport11)	NA	A3	AT3G63510_ID36	AT3G63510_ID43	WT_24h	WT_3h
AT3G63510	FMN-linked oxidoreductases superfamily protein;(source:Araport11)	NA	IR	AT3G63510_ID36	AT3G63510_ID43	WT_24h	WT_3h
AT3G63510	FMN-linked oxidoreductases superfamily protein;(source:Araport11)	NA	IR	AT3G63510_s1	AT3G63510_ID43	WT_24h	WT_3h
AT3G63510	FMN-linked oxidoreductases superfamily protein;(source:Araport11)	NA	IR	AT3G63510_ID47	AT3G63510_ID43	WT_24h	WT_3h
AT4G00500	alpha/beta-Hydrolases superfamily protein;(source:Araport11)	NA	A3	AT4G00500.1	AT4G00500_s3	WT_24h	WT_3h
AT4G00800	transducin family protein / WD-40 repeat family protein;(source:Araport11)	SETH5,VPS8	IR	AT4G00800_P1	AT4G00800_P2	WT_24h	WT_3h
AT4G01250	AtWRKY22 is a member of WRKY Transcription Factor; Group II-e. It is involved in regulation of dark induced leaf senescence.	AtWRKY22,WRKY22	IR	AT4G01250_ID2	AT4G01250.1	WT_24h	WT_3h
AT4G01770	Encodes a protein with UDP-xylose-dependent xylosyltransferase activity, which transfers Xyl onto L-fucose and (albeit less efficiently) L-arabinose. The linkage to L-fucose was shown to be preferentially to the <i>O</i>-4 position. Analysis of mutant containing T-DNA insertion in this gene indicate that the RGXT1 protein might be involved in the synthesis of the &alpha;-D-Xyl-(1,3)-&alpha;-L-Fuc…	RGXT1	IR	AT4G01770_ID5	AT4G01770_P1	WT_24h	WT_3h
AT4G01770	Encodes a protein with UDP-xylose-dependent xylosyltransferase activity, which transfers Xyl onto L-fucose and (albeit less efficiently) L-arabinose. The linkage to L-fucose was shown to be preferentially to the <i>O</i>-4 position. Analysis of mutant containing T-DNA insertion in this gene indicate that the RGXT1 protein might be involved in the synthesis of the &alpha;-D-Xyl-(1,3)-&alpha;-L-Fuc…	RGXT1	IR	AT4G01770_P2	AT4G01770_P1	WT_24h	WT_3h
AT4G01883	Polyketide cyclase / dehydrase and lipid transport protein;(source:Araport11)	MLBP1	IR	AT4G01883_P3	AT4G01883_P1	WT_24h	WT_3h
AT4G02075	RING/FYVE/PHD zinc finger superfamily protein;(source:Araport11)	PIT1	IR	AT4G02075_P1	AT4G02075_P2	WT_24h	WT_3h
AT4G02075	RING/FYVE/PHD zinc finger superfamily protein;(source:Araport11)	PIT1	IR	AT4G02075_P3	AT4G02075_P2	WT_24h	WT_3h
AT4G02260	Displays guanosine-3',5'-bis(diphosphate) 3'-diphosphatase activity but not guanosine-3',5'-bis(diphosphate) 3'-diphosphate synthase activity. Involved in the maintenance of the (p)ppGp level to accustom plastidial gene expression to darkness.	AT-RSH1,ATRSH1,RSH1	A3	AT4G02260_JS2	AT4G02260_P1	WT_24h	WT_3h
AT4G02890	Polyubiquitin gene containing 4 ubiquitin repeats.	UBQ14	A5	AT4G02890_P4	AT4G02890.1	WT_24h	WT_3h
AT4G02890	Polyubiquitin gene containing 4 ubiquitin repeats.	UBQ14	IR	AT4G02890_P4	AT4G02890.1	WT_24h	WT_3h
AT4G03030	Galactose oxidase/kelch repeat superfamily protein;(source:Araport11)	NA	A5	AT4G03030_P1	AT4G03030_ID1	WT_24h	WT_3h
AT4G03030	Galactose oxidase/kelch repeat superfamily protein;(source:Araport11)	NA	IR	AT4G03030_P1	AT4G03030_ID1	WT_24h	WT_3h
AT4G04330	Encodes a chloroplast thylakoid localized RbcX protein that acts as a chaperone in the folding of Rubisco.	AtRbcX1,RbcX1	IR	AT4G04330_s1	AT4G04330_P1	WT_24h	WT_3h
AT4G04350	tRNA synthetase class I (I, L, M and V) family protein;(source:Araport11)	EMB2369	A3	AT4G04350_ID31	AT4G04350.1	WT_24h	WT_3h
AT4G04350	tRNA synthetase class I (I, L, M and V) family protein;(source:Araport11)	EMB2369	IR	AT4G04350_ID31	AT4G04350.1	WT_24h	WT_3h
AT4G04955	Encodes an allantoinase which is involved in allantoin degradation and assimilation. Gene expression was induced when allantoin was added to the medium. The insertion mutant, ataln m2-1, did not grow well on the MS medium where allantoin, instead of ammonium nitrate, was supplied.	ALN,ATALN	IR	AT4G04955_P1	AT4G04955_ID3	WT_24h	WT_3h
AT4G05050	polyubiquitin gene, belongs to a subtype group with UBQ10 and UBQ14. Various ecotypes of Arabidopsis have different numbers of ubiquitin repeats within this gene.	UBQ11	IR	AT4G05050_P1	AT4G05050_s1	WT_24h	WT_3h
AT4G05090	Inositol monophosphatase family protein;(source:Araport11)	NA	A3	AT4G05090_ID2	AT4G05090_P1	WT_24h	WT_3h
AT4G05090	Inositol monophosphatase family protein;(source:Araport11)	NA	A5	AT4G05090_ID2	AT4G05090_P1	WT_24h	WT_3h
AT4G05320	One of five polyubiquitin genes in A. thaliana. These genes encode the highly conserved 76-amino acid protein ubiquitin that is covalently attached to substrate proteins targeting most for degradation. Polyubiquitin genes are characterized by the presence of tandem repeats of the 228 bp that encode a ubiquitin monomer. Induced by salicylic acid. Independent of NPR1 for their induction by salicyli…	UBI10,UBQ10	IR	AT4G05320_P2	AT4G05320_P7	WT_24h	WT_3h
AT4G06634	Encodes an ABA responsive C2H2-type zinc finger transcription factor with both transcriptional repression and activation domains, that binds a G-rich, 11-bp DNA-binding motif. YY1 binds to the promoter of ABR1 and disruption represses ABA- and salt-induced ABR1 expression.	AtYY1,YY1	A3	AT4G06634.1	AT4G06634_s1	WT_24h	WT_3h
AT4G06634	Encodes an ABA responsive C2H2-type zinc finger transcription factor with both transcriptional repression and activation domains, that binds a G-rich, 11-bp DNA-binding motif. YY1 binds to the promoter of ABR1 and disruption represses ABA- and salt-induced ABR1 expression.	AtYY1,YY1	IR	AT4G06634.1	AT4G06634_s1	WT_24h	WT_3h
AT4G06634	Encodes an ABA responsive C2H2-type zinc finger transcription factor with both transcriptional repression and activation domains, that binds a G-rich, 11-bp DNA-binding motif. YY1 binds to the promoter of ABR1 and disruption represses ABA- and salt-induced ABR1 expression.	AtYY1,YY1	A3	AT4G06634.1	AT4G06634_s2	WT_24h	WT_3h
AT4G07507	transposable_element_gene;(source:Araport11);pseudogene, replication protein A1 -related, similar to putative replication protein A1;(source:TAIR10)	NA	IR	AT4G07507_JC15	AT4G07507_s6	WT_24h	WT_3h
AT4G10050	esterase/lipase/thioesterase family protein;(source:Araport11)	PMES	IR	AT4G10050_P1	AT4G10050_P2	WT_24h	WT_3h
AT4G10330	glycine-rich protein;(source:Araport11)	NA	A3	AT4G10330_JS2	AT4G10330_P1	WT_24h	WT_3h
AT4G11110	Encodes a member of the SPA (suppressor of phyA-105) protein family (SPA1-SPA4). SPA proteins contain an N-terminal serine/threonine kinase-like motif followed by a coiled-coil structure and a C-terminal WD-repeat domain. SPA proteins function redundantly in suppressing photomorphogenesis in dark- and light-grown seedlings. SPA2 primarily regulates seedling development in darkness and has little …	SPA2	IR	AT4G11110.1	AT4G11110_JS3	WT_24h	WT_3h
AT4G11820	Encodes a protein with hydroxymethylglutaryl-CoA synthase activity which was characterized by phenotypical complementation of the S. cerevisiae mutant. Involved in glucosinolate biosynthesis.	FKP1,HMGS,MVA1	IR	AT4G11820_P2	AT4G11820_JS7	WT_24h	WT_3h
AT4G12020	Encodes a member of the A1 subgroup of the MEKK (MAPK/ERK kinase kinase) family. MEKK is another name for Mitogen-Activated Protein Kinase Kinase Kinase (MAPKKK or MAP3K). This subgroup has four members: At4g08500 (MEKK1, also known as ARAKIN, MAP3Kb1, MAPKKK8), At4g08480 (MEKK2, also known as MAP3Kb4, MAPKKK9), At4g08470 (MEKK3, also known as MAP3Kb3, MAPKKK10) and At4g12020 (MEKK4, also known a…	ATWRKY19,MAPKKK11,MEKK4,WRKY19	IR	AT4G12020_P4	AT4G12020_JC4	WT_24h	WT_3h
AT4G12020	Encodes a member of the A1 subgroup of the MEKK (MAPK/ERK kinase kinase) family. MEKK is another name for Mitogen-Activated Protein Kinase Kinase Kinase (MAPKKK or MAP3K). This subgroup has four members: At4g08500 (MEKK1, also known as ARAKIN, MAP3Kb1, MAPKKK8), At4g08480 (MEKK2, also known as MAP3Kb4, MAPKKK9), At4g08470 (MEKK3, also known as MAP3Kb3, MAPKKK10) and At4g12020 (MEKK4, also known a…	ATWRKY19,MAPKKK11,MEKK4,WRKY19	IR	AT4G12020_P4	AT4G12020_P5	WT_24h	WT_3h
AT4G12760	RPA-interacting protein A;(source:Araport11)	NA	A3	AT4G12760_ID4	AT4G12760_ID2	WT_24h	WT_3h
AT4G12760	RPA-interacting protein A;(source:Araport11)	NA	IR	AT4G12760_ID4	AT4G12760_ID2	WT_24h	WT_3h
AT4G12780	Negative regulation of growth and endocytosis, most likely as a result of inhibition of the recruitment of clathrin to endocytic pits. Overexpression inhbits recruitment of clathrin resulting in negative regulation of endocytosis and developmental arrest.	AUXILIN-LIKE1	IR	AT4G12780_P4	AT4G12780_P6	WT_24h	WT_3h
AT4G13850	Encodes a glycine-rich RNA-binding protein. Gene expression is induced by cold.	ATGRP2,GR-RBP2,GRP2,RBGA5	A3	AT4G13850_P1	AT4G13850_s1	WT_24h	WT_3h
AT4G13850	Encodes a glycine-rich RNA-binding protein. Gene expression is induced by cold.	ATGRP2,GR-RBP2,GRP2,RBGA5	A5	AT4G13850_P1	AT4G13850_s1	WT_24h	WT_3h
AT4G13850	Encodes a glycine-rich RNA-binding protein. Gene expression is induced by cold.	ATGRP2,GR-RBP2,GRP2,RBGA5	IR	AT4G13850_P1	AT4G13850_s1	WT_24h	WT_3h
AT4G13940	Encodes a S-adenosyl-L-homocysteine hydrolase required for DNA methylation-dependent gene silencing. The mRNA is cell-to-cell mobile.	ATSAHH1,EMB1395,HOG1,MEE58,SAH1,SAHH1	A3	AT4G13940_P1	AT4G13940_ID3	WT_24h	WT_3h
AT4G13940	Encodes a S-adenosyl-L-homocysteine hydrolase required for DNA methylation-dependent gene silencing. The mRNA is cell-to-cell mobile.	ATSAHH1,EMB1395,HOG1,MEE58,SAH1,SAHH1	A5	AT4G13940_P1	AT4G13940_ID3	WT_24h	WT_3h
AT4G13940	Encodes a S-adenosyl-L-homocysteine hydrolase required for DNA methylation-dependent gene silencing. The mRNA is cell-to-cell mobile.	ATSAHH1,EMB1395,HOG1,MEE58,SAH1,SAHH1	A3	AT4G13940_P1	AT4G13940_ID5	WT_24h	WT_3h
AT4G13940	Encodes a S-adenosyl-L-homocysteine hydrolase required for DNA methylation-dependent gene silencing. The mRNA is cell-to-cell mobile.	ATSAHH1,EMB1395,HOG1,MEE58,SAH1,SAHH1	A5	AT4G13940_P1	AT4G13940_ID5	WT_24h	WT_3h
AT4G14500	Polyketide cyclase/dehydrase and lipid transport superfamily protein;(source:Araport11)	NA	A3	AT4G14500.1	AT4G14500_ID10	WT_24h	WT_3h
AT4G14500	Polyketide cyclase/dehydrase and lipid transport superfamily protein;(source:Araport11)	NA	MES	AT4G14500.1	AT4G14500_ID10	WT_24h	WT_3h
AT4G14605	Encodes a putative mitochondrial transcription termination factor whose mutation results in plants that exhibit altered chloroplast morphology and plant growth, and reduced pigmentation of cotyledons, leaves, stems and sepals.	MDA1	A3	AT4G14605_P1	AT4G14605_P2	WT_24h	WT_3h
AT4G14880	Encodes a cytosolic isoform of cytosolic O-acetylserine(thiol)lyase, a key enzyme in cysteine biosynthesis and for the fixation of inorganic sulfide. It catalyzes the formation of cysteine from O-acetylserine and inorganic sulfide. Gene expression is predominant in the root cortex and the xylem parenchyma. Gene expression is induced in leave, stems and roots by high salt and heavy metal stresses,…	ATCYS-3A,CYTACS1,OASA1,OLD3	MES	AT4G14880_P1	AT4G14880_JC11	WT_24h	WT_3h
AT4G15230	pleiotropic drug resistance 2;(source:Araport11)	ABCG30,ATPDR2,PDR2	IR	AT4G15230.1	AT4G15230_c1	WT_24h	WT_3h
AT4G15233	ABC-2 and Plant PDR ABC-type transporter family protein;(source:Araport11)	ABCG42	A3	AT4G15233_P8	AT4G15233_JS10	WT_24h	WT_3h
AT4G15233	ABC-2 and Plant PDR ABC-type transporter family protein;(source:Araport11)	ABCG42	A3	AT4G15233_P9	AT4G15233_JS10	WT_24h	WT_3h
AT4G15233	ABC-2 and Plant PDR ABC-type transporter family protein;(source:Araport11)	ABCG42	ES	AT4G15233_P8	AT4G15233_JS10	WT_24h	WT_3h
AT4G15233	ABC-2 and Plant PDR ABC-type transporter family protein;(source:Araport11)	ABCG42	IR	AT4G15233_JC33	AT4G15233_JS10	WT_24h	WT_3h
AT4G15233	ABC-2 and Plant PDR ABC-type transporter family protein;(source:Araport11)	ABCG42	IR	AT4G15233_P9	AT4G15233_JS10	WT_24h	WT_3h
AT4G15233	ABC-2 and Plant PDR ABC-type transporter family protein;(source:Araport11)	ABCG42	IR	AT4G15233_P8	AT4G15233_JS10	WT_24h	WT_3h
AT4G15415	B' regulatory subunit of PP2A (AtB'gamma)	ATB'_GAMMA	IR	AT4G15415_P2	AT4G15415_P1	WT_24h	WT_3h
AT4G15890	CAP-3D is a subunit of condensin. It a target of MMD1 regulation and also involved in meiotic chromosome condensation. Mutants have reduced fertility. Required for the correct spatial relationship between centromeres and rDNA arrays.	CAP-D3	A3	AT4G15890_s1	AT4G15890_P1	WT_24h	WT_3h
AT4G15940	Fumarylacetoacetate hydrolase homolog; involved in seed redox regulation and to affect seed quality traits such as seed thermo-dormancy and longevity.	NA	IR	AT4G15940_P1	AT4G15940_s1	WT_24h	WT_3h
AT4G16143	Protein interacts with Agrobacterium proteins VirD2 and VirE2. Is not individually essential for Agrobacterium-mediated root transformation, but when overexpressed can rescue the impa-4 decreased transformation susceptibility phenotype.	IMPA-2	IR	AT4G16143_P2	AT4G16143_P1	WT_24h	WT_3h
AT4G16420	Transcriptional co-activator. Essential for the developmental switch from cell proliferation to cell differentiation in response to variations in auxin and cytokinin concentrations. Part of SAGA complex. Regulates gene expression by affecting histone H3 acetylation.	ADA2B,PRZ1	A3	AT4G16420_ID2	AT4G16420_ID12	WT_24h	WT_3h
AT4G16420	Transcriptional co-activator. Essential for the developmental switch from cell proliferation to cell differentiation in response to variations in auxin and cytokinin concentrations. Part of SAGA complex. Regulates gene expression by affecting histone H3 acetylation.	ADA2B,PRZ1	IR	AT4G16420_ID2	AT4G16420_ID12	WT_24h	WT_3h
AT4G16765	2-oxoglutarate (2OG) and Fe(II)-dependent oxygenase superfamily protein;(source:Araport11)	NA	A3	AT4G16765_JC1	AT4G16765_P3	WT_24h	WT_3h
AT4G16765	2-oxoglutarate (2OG) and Fe(II)-dependent oxygenase superfamily protein;(source:Araport11)	NA	A3	AT4G16765_JC1	AT4G16765_s2	WT_24h	WT_3h
AT4G16990	disease resistance protein (TIR-NBS class);(source:Araport11)	RLM3	A3	AT4G16990_P16	AT4G16990_P8	WT_24h	WT_3h
AT4G16990	disease resistance protein (TIR-NBS class);(source:Araport11)	RLM3	IR	AT4G16990_ID14	AT4G16990_P8	WT_24h	WT_3h
AT4G16990	disease resistance protein (TIR-NBS class);(source:Araport11)	RLM3	IR	AT4G16990_P16	AT4G16990_P8	WT_24h	WT_3h
AT4G17310	hypothetical protein;(source:Araport11)	NA	A5	AT4G17310_JS6	AT4G17310_P7	WT_24h	WT_3h
AT4G17310	hypothetical protein;(source:Araport11)	NA	ES	AT4G17310_JS6	AT4G17310_P7	WT_24h	WT_3h
AT4G17310	hypothetical protein;(source:Araport11)	NA	IR	AT4G17310_JS6	AT4G17310_P7	WT_24h	WT_3h
AT4G17410	PQT3 is a nuclear localized E3 ligase involved in negative regulation of stress tolerance.PRMT4b is a substrate of PQT3.	PQT3	A3	AT4G17410_s1	AT4G17410_s2	WT_24h	WT_3h
AT4G17620	NAD-RNA decapping enzyme.Mediates the connection between RNA turnover and retrograde chloroplast-to-nucleus signaling. Catalyzes the hydrolysis of RNAs bearing a 5 -hydroxyl group (5-OH RNA).	NA	A5	AT4G17620_P1	AT4G17620_ID3	WT_24h	WT_3h
AT4G17620	NAD-RNA decapping enzyme.Mediates the connection between RNA turnover and retrograde chloroplast-to-nucleus signaling. Catalyzes the hydrolysis of RNAs bearing a 5 -hydroxyl group (5-OH RNA).	NA	IR	AT4G17620_P1	AT4G17620_ID3	WT_24h	WT_3h
AT4G17670	senescence-associated family protein (DUF581);(source:Araport11)	NA	IR	AT4G17670_P1	AT4G17670_ID1	WT_24h	WT_3h
AT4G18710	Encodes BIN2, a member of the ATSK (shaggy-like kinase) family. BIN2 functions in the cross-talk between auxin and brassinosteroid signaling pathways. BIN2 regulates root epidermal cell fate specification by phosphorylating EGL3 and TTG1. BIN2-mediated phosphorylation appears to promote BZR1 export from the nucleus. KIB1 interacts with BIN2 blocking its interaction with substrates and promotes BI…	ATSK21,BIN2,DWF12,SK21,UCU1	A3	AT4G18710.2	AT4G18710_P2	WT_24h	WT_3h
AT4G18710	Encodes BIN2, a member of the ATSK (shaggy-like kinase) family. BIN2 functions in the cross-talk between auxin and brassinosteroid signaling pathways. BIN2 regulates root epidermal cell fate specification by phosphorylating EGL3 and TTG1. BIN2-mediated phosphorylation appears to promote BZR1 export from the nucleus. KIB1 interacts with BIN2 blocking its interaction with substrates and promotes BI…	ATSK21,BIN2,DWF12,SK21,UCU1	A5	AT4G18710.2	AT4G18710_P2	WT_24h	WT_3h
AT4G19420	Pectinacetylesterase family protein;(source:Araport11)	PAE8	IR	AT4G19420_P1	AT4G19420_JS1	WT_24h	WT_3h
AT4G19440	Tetratricopeptide repeat (TPR)-like superfamily protein;(source:Araport11)	NA	A3	AT4G19440_P4	AT4G19440_P1	WT_24h	WT_3h
AT4G20350	Putative RNA demethylase involved in seed germination, seedling growth and abiotic stress responses.	NA	ES	AT4G20350_P6	AT4G20350_P4	WT_24h	WT_3h
AT4G20350	Putative RNA demethylase involved in seed germination, seedling growth and abiotic stress responses.	NA	A5	AT4G20350_P6	AT4G20350_P5	WT_24h	WT_3h
AT4G20350	Putative RNA demethylase involved in seed germination, seedling growth and abiotic stress responses.	NA	IR	AT4G20350_P6	AT4G20350_P5	WT_24h	WT_3h
AT4G21910	MATE efflux family protein;(source:Araport11)	NA	ES	AT4G21910_P2	AT4G21910.1	WT_24h	WT_3h
AT4G21910	MATE efflux family protein;(source:Araport11)	NA	IR	AT4G21910_P2	AT4G21910.1	WT_24h	WT_3h
AT4G21940	member of Calcium Dependent Protein Kinase	CPK15	IR	AT4G21940_P3	AT4G21940.2	WT_24h	WT_3h
AT4G22340	cytidinediphosphate diacylglycerol synthase 2;(source:Araport11)	CDS2	IR	AT4G22340_P1	AT4G22340_P3	WT_24h	WT_3h
AT4G24710	Encodes an AAA+ ATPase that mediates meiotic chromosome remodeling and crossover maturation.	PCH2	IR	AT4G24710_P3	AT4G24710_c1	WT_24h	WT_3h
AT4G24710	Encodes an AAA+ ATPase that mediates meiotic chromosome remodeling and crossover maturation.	PCH2	IR	AT4G24710_P3	AT4G24710_P2	WT_24h	WT_3h
AT4G25400	basic helix-loop-helix (bHLH) DNA-binding superfamily protein;(source:Araport11)	NA	IR	AT4G25400_P1	AT4G25400_ID2	WT_24h	WT_3h
AT4G25720	This locus encodes a protein with similarity to gamma-glutamylcyclotransferase that may be involved in catalyzing the formation of pyroglutate residue on proteins that have been post-translationally processed to reveal a glutamine at their N-terminus. Enzymatic assays to test the function of this protein were performed using a truncated form of the protein lacking a signal peptide that is most si…	ATQC,QC,QCT	IR	AT4G25720_P1	AT4G25720_P2	WT_24h	WT_3h
AT4G25960	P-glycoprotein 2;(source:Araport11)	ABCB2,PGP2	IR	AT4G25960_P1	AT4G25960_ID4	WT_24h	WT_3h
AT4G26300	Arginyl-tRNA synthetase, class Ic;(source:Araport11)	emb1027	A3	AT4G26300_ID6	AT4G26300_ID5	WT_24h	WT_3h
AT4G26520	Aldolase superfamily protein;(source:Araport11)	AtFBA7,FBA7	IR	AT4G26520_ID5	AT4G26520.1	WT_24h	WT_3h
AT4G26530	Aldolase superfamily protein;(source:Araport11)	AtFBA5,FBA5	A3	AT4G26530.1	AT4G26530.2	WT_24h	WT_3h
AT4G26600	S-adenosyl-L-methionine-dependent methyltransferases superfamily protein;(source:Araport11)	AtTRM4d,NOP2B,TRM4d	IR	AT4G26600_P3	AT4G26600_P1	WT_24h	WT_3h
AT4G26860	Putative pyridoxal phosphate-dependent enzyme, YBL036C type;(source:Araport11)	NA	IR	AT4G26860_ID3	AT4G26860_P1	WT_24h	WT_3h
AT4G27610	intracellular protein transporter;(source:Araport11)	NA	A5	AT4G27610_P3	AT4G27610_P2	WT_24h	WT_3h
AT4G27610	intracellular protein transporter;(source:Araport11)	NA	IR	AT4G27610_P3	AT4G27610_P2	WT_24h	WT_3h
AT4G27610	intracellular protein transporter;(source:Araport11)	NA	MES	AT4G27610_P3	AT4G27610_P2	WT_24h	WT_3h
AT4G27960	ubiquitin conjugating enzyme	UBC9	IR	AT4G27960_P2	AT4G27960_P1	WT_24h	WT_3h
AT4G28110	Member of the R2R3 factor gene family. Expression is induced in response to desiccation, ABA and salt treatment. Overexpression of Myb41 results in abnormal cuticle development and decreased cell expansion.	AtMYB41,MYB41	IR	AT4G28110_P1	AT4G28110_P2	WT_24h	WT_3h
AT4G28360	Ribosomal protein L22p/L17e family protein;(source:Araport11)	NA	A3	AT4G28360_P1	AT4G28360_ID1	WT_24h	WT_3h
AT4G28360	Ribosomal protein L22p/L17e family protein;(source:Araport11)	NA	A5	AT4G28360_P1	AT4G28360_ID1	WT_24h	WT_3h
AT4G28360	Ribosomal protein L22p/L17e family protein;(source:Araport11)	NA	ES	AT4G28360_P1	AT4G28360_ID1	WT_24h	WT_3h
AT4G29000	Tesmin/TSO1-like CXC domain-containing protein which is a transcriptional repressor of genes required for maintenance of DNA methylation, including MET1, CMT3, DDM1, KYP and VIMs. Functions redundantly with its paralogue TCX6 in repressing the expression of these genes.	NA	IR	AT4G29000_ID10	AT4G29000.1	WT_24h	WT_3h
AT4G29060	Involved in chloroplast biogenesis and early embryo development. May function as an EF-Ts to regulate plastid translation.	emb2726	A3	AT4G29060_P1	AT4G29060_ID66	WT_24h	WT_3h
AT4G29060	Involved in chloroplast biogenesis and early embryo development. May function as an EF-Ts to regulate plastid translation.	emb2726	A5	AT4G29060_P1	AT4G29060_ID66	WT_24h	WT_3h
AT4G29060	Involved in chloroplast biogenesis and early embryo development. May function as an EF-Ts to regulate plastid translation.	emb2726	ES	AT4G29060_P1	AT4G29060_ID66	WT_24h	WT_3h
AT4G29530	Encodes a thiamin monophosphate phosphatase. Knockouts show no visible defects either in morphology or thiamin, ThMP and ThDP levels suggesting that Arabidopsis at least one other source of ThMPase activity.	NA	A3	AT4G29530_P2	AT4G29530_ID1	WT_24h	WT_3h
AT4G29530	Encodes a thiamin monophosphate phosphatase. Knockouts show no visible defects either in morphology or thiamin, ThMP and ThDP levels suggesting that Arabidopsis at least one other source of ThMPase activity.	NA	IR	AT4G29530_P2	AT4G29530_ID1	WT_24h	WT_3h
AT4G29530	Encodes a thiamin monophosphate phosphatase. Knockouts show no visible defects either in morphology or thiamin, ThMP and ThDP levels suggesting that Arabidopsis at least one other source of ThMPase activity.	NA	A3	AT4G29530_P2	AT4G29530_s1	WT_24h	WT_3h
AT4G29750	CRS1 / YhbY (CRM) domain-containing protein;(source:Araport11)	NA	IR	AT4G29750_P1	AT4G29750_P2	WT_24h	WT_3h
AT4G30570	Glucose-1-phosphate adenylyltransferase family protein;(source:Araport11)	NA	IR	AT4G30570_ID1	AT4G30570_P1	WT_24h	WT_3h
AT4G30580	Encodes a plastidic lysophosphatidic acid acyltransferase (LPAAT). Is critical for chloroplasts phosphatidic acid biosynthesis. The null allele is embryo lethal.	ATS2,EMB1995,LPAT1	A3	AT4G30580_ID3	AT4G30580_P1	WT_24h	WT_3h
AT4G30580	Encodes a plastidic lysophosphatidic acid acyltransferase (LPAAT). Is critical for chloroplasts phosphatidic acid biosynthesis. The null allele is embryo lethal.	ATS2,EMB1995,LPAT1	IR	AT4G30580_ID3	AT4G30580_P1	WT_24h	WT_3h
AT4G30993	Calcineurin-like metallo-phosphoesterase superfamily protein;(source:Araport11)	NA	A3	AT4G30993_c1	AT4G30993_P3	WT_24h	WT_3h
AT4G30993	Calcineurin-like metallo-phosphoesterase superfamily protein;(source:Araport11)	NA	IR	AT4G30993_c1	AT4G30993_P3	WT_24h	WT_3h
AT4G31240	protein kinase C-like zinc finger protein;(source:Araport11)	AtNRX2,NRX2	IR	AT4G31240_P1	AT4G31240_ID1	WT_24h	WT_3h
AT4G31240	protein kinase C-like zinc finger protein;(source:Araport11)	AtNRX2,NRX2	IR	AT4G31240_P1	AT4G31240_P2	WT_24h	WT_3h
AT4G31400	Encodes CTF7, a homolog of the yeast CTF protein required for the formation of sister chromatid cohesion. Arabidopsis CTF7 is similar to Saccharomyces cerevisiae CTF7 in that it lacks an N-terminal extension, exhibits acetyltransferase activity, and can complement a yeast ctf7 temperature-sensitive mutation. Arabidopsis CTF7 is critical for female gametophyte and embryo development, but not for t…	AtCTF7,CTF7,ECO1	IR	AT4G31400_P2	AT4G31400_P1	WT_24h	WT_3h
AT4G31570	nucleoporin;(source:Araport11)	NA	A5	AT4G31570_P4	AT4G31570_P2	WT_24h	WT_3h
AT4G31570	nucleoporin;(source:Araport11)	NA	IR	AT4G31570_P4	AT4G31570_P2	WT_24h	WT_3h
AT4G31870	Encodes glutathione peroxidase. Role in the degradation of H2O2 to water using glutathione as electron donor.	ATGPX7,GPX7,GPXL7	A5	AT4G31870_ID2	AT4G31870.1	WT_24h	WT_3h
AT4G32250	Encodes a component of the TOC machinery that phosphorylates import receptors, supports pre-protein import, and contributes to efficient chloroplast biogenesis.	KOC1	IR	AT4G32250_P2	AT4G32250_P1	WT_24h	WT_3h
AT4G32900	Peptidyl-tRNA hydrolase II (PTH2) family protein;(source:Araport11)	NA	IR	AT4G32900_P2	AT4G32900_JS1	WT_24h	WT_3h
AT4G32900	Peptidyl-tRNA hydrolase II (PTH2) family protein;(source:Araport11)	NA	A5	AT4G32900_P2	AT4G32900_s2	WT_24h	WT_3h
AT4G32900	Peptidyl-tRNA hydrolase II (PTH2) family protein;(source:Araport11)	NA	IR	AT4G32900_P2	AT4G32900_s2	WT_24h	WT_3h
AT4G32915	glutamyl-tRNA(Gln) amidotransferase subunit C;(source:Araport11)	NA	IR	AT4G32915_ID2	AT4G32915_P1	WT_24h	WT_3h
AT4G33050	Encodes a calmodulin-binding protein involved in stomatal movement.	AtIQM1,EDA39,IQM1	IR	AT4G33050_P5	AT4G33050_ID2	WT_24h	WT_3h
AT4G33050	Encodes a calmodulin-binding protein involved in stomatal movement.	AtIQM1,EDA39,IQM1	IR	AT4G33050_P5	AT4G33050_P4	WT_24h	WT_3h
AT4G33110	S-adenosyl-L-methionine-dependent methyltransferases superfamily protein;(source:Araport11)	NA	A5	AT4G33110_JC2	AT4G33110.2	WT_24h	WT_3h
AT4G33470	Encodes HDA14, a member of the histone deacetylase family proteins that can deacetylate a-tubulin, associates with a/b-tubulin and is retained on GTP/taxol-stabilized microtubules, at least in part, by direct association with the PP2A-A2 subunit. The association of a histone deacetylase with PP2A suggests a direct link between protein phosphorylation and acetylation. Class II RPD3-like family HDA…	ATHDA14,AtHDAC14,HDA14,HDAC14	A3	AT4G33470_ID18	AT4G33470_P1	WT_24h	WT_3h
AT4G33470	Encodes HDA14, a member of the histone deacetylase family proteins that can deacetylate a-tubulin, associates with a/b-tubulin and is retained on GTP/taxol-stabilized microtubules, at least in part, by direct association with the PP2A-A2 subunit. The association of a histone deacetylase with PP2A suggests a direct link between protein phosphorylation and acetylation. Class II RPD3-like family HDA…	ATHDA14,AtHDAC14,HDA14,HDAC14	A5	AT4G33470_ID18	AT4G33470_P1	WT_24h	WT_3h
AT4G33470	Encodes HDA14, a member of the histone deacetylase family proteins that can deacetylate a-tubulin, associates with a/b-tubulin and is retained on GTP/taxol-stabilized microtubules, at least in part, by direct association with the PP2A-A2 subunit. The association of a histone deacetylase with PP2A suggests a direct link between protein phosphorylation and acetylation. Class II RPD3-like family HDA…	ATHDA14,AtHDAC14,HDA14,HDAC14	IR	AT4G33470_ID18	AT4G33470_P1	WT_24h	WT_3h
AT4G33520	Encodes a putative metal-transporting P-type ATPase PAA1. An alternative-splicing event of the PAA1 pre-mRNA produces a copper chaperon named PCH1. The mRNA is cell-to-cell mobile.	AtHMAC6,HMA6,PAA1,PCH1	A3	AT4G33520_P2	AT4G33520_JC7	WT_24h	WT_3h
AT4G33520	Encodes a putative metal-transporting P-type ATPase PAA1. An alternative-splicing event of the PAA1 pre-mRNA produces a copper chaperon named PCH1. The mRNA is cell-to-cell mobile.	AtHMAC6,HMA6,PAA1,PCH1	ES	AT4G33520_P2	AT4G33520_JC7	WT_24h	WT_3h
AT4G33740	myb-like protein X;(source:Araport11)	NA	A3	AT4G33740_P4	AT4G33740.2	WT_24h	WT_3h
AT4G33740	myb-like protein X;(source:Araport11)	NA	A3	AT4G33740_P4	AT4G33740_P1	WT_24h	WT_3h
AT4G33740	myb-like protein X;(source:Araport11)	NA	A3	AT4G33740_P4	AT4G33740_P3	WT_24h	WT_3h
AT4G33740	myb-like protein X;(source:Araport11)	NA	A5	AT4G33740_P4	AT4G33740_P3	WT_24h	WT_3h
AT4G33760	Aminoacyl tRNA synthetase functions in SAM maintenance.	NA	A3	AT4G33760_ID1	AT4G33760_P1	WT_24h	WT_3h
AT4G34750	SAUR-like auxin-responsive protein family;(source:Araport11)	SAUR49	IR	AT4G34750_P1	AT4G34750_P2	WT_24h	WT_3h
AT4G34900	xanthine dehydrogenase 2;(source:Araport11)	ATXDH2,XDH2	A3	AT4G34900_JS4	AT4G34900_c1	WT_24h	WT_3h
AT4G34900	xanthine dehydrogenase 2;(source:Araport11)	ATXDH2,XDH2	A5	AT4G34900_JS4	AT4G34900_c1	WT_24h	WT_3h
AT4G34950	Major facilitator superfamily protein;(source:Araport11)	MFS1	IR	AT4G34950_P1	AT4G34950_s1	WT_24h	WT_3h
AT4G35310	calmodulin-domain protein kinase CDPK isoform 5 (CPK5)	ATCPK5,CPK5	A3	AT4G35310_P1	AT4G35310_P2	WT_24h	WT_3h
AT4G35310	calmodulin-domain protein kinase CDPK isoform 5 (CPK5)	ATCPK5,CPK5	A5	AT4G35310_P1	AT4G35310_s2	WT_24h	WT_3h
AT4G35440	Enclodes a choride channel protein that is localized to the thlakoid membrane.	ATCLC-E,CLC-E,CLCE	A5	AT4G35440_ID2	AT4G35440.1	WT_24h	WT_3h
AT4G35740	Encodes RECQ3, an ATP-dependent helicase.	ATRECQ3,RecQl3	A3	AT4G35740_P1	AT4G35740_JS6	WT_24h	WT_3h
AT4G35770	Senescence-associated gene that is strongly induced by phosphate starvation. Transcripts are differentially regulated at the level of mRNA stability at different times of day. mRNAs are targets of the mRNA degradation pathway mediated by the downstream (DST) instability determinant.	ATSEN1,DIN1,SEN1,SEN1	IR	AT4G35770_P1	AT4G35770_P2	WT_24h	WT_3h
AT4G36648	other_RNA;(source:Araport11)	NA	IR	AT4G36648.1	AT4G36648_c1	WT_24h	WT_3h
AT4G36648	other_RNA;(source:Araport11)	NA	IR	AT4G36648_ID2	AT4G36648_c1	WT_24h	WT_3h
AT4G36730	member of a gene family encoding basic leucine zipper proteins (GBFs) which bind the G-box	AtGBF1,GBF1	IR	AT4G36730.1	AT4G36730_ID6	WT_24h	WT_3h
AT4G38090	ribosomal protein S5 domain protein;(source:Araport11)	NA	IR	AT4G38090_P3	AT4G38090_P1	WT_24h	WT_3h
AT4G38090	ribosomal protein S5 domain protein;(source:Araport11)	NA	IR	AT4G38090.3	AT4G38090_P1	WT_24h	WT_3h
AT4G38100	CURVATURE THYLAKOID 1D-like protein; involved in thylakoid membrane organization.	CURT1D	IR	AT4G38100_P2	AT4G38100_P1	WT_24h	WT_3h
AT4G38950	ATP binding microtubule motor family protein;(source:Araport11)	NA	A3	AT4G38950_P4	AT4G38950_JC7	WT_24h	WT_3h
AT4G38950	ATP binding microtubule motor family protein;(source:Araport11)	NA	IR	AT4G38950_P4	AT4G38950_JC7	WT_24h	WT_3h
AT4G38950	ATP binding microtubule motor family protein;(source:Araport11)	NA	IR	AT4G38950_P4	AT4G38950_P1	WT_24h	WT_3h
AT4G39090	Similar to cysteine proteinases, induced by desiccation but not abscisic acid. Required for RRS1-R mediated resistance against Ralstonia solanacearum. Interacts with the R. solanacearum type III effector PopP2. RD19 associates with PopP2 to form a nuclear complex that is required for activation of the RRS1-R?mediated resistance response.	RD19,RD19A	IR	AT4G39090_P1	AT4G39090_JC2	WT_24h	WT_3h
AT4G39150	DNAJ heat shock N-terminal domain-containing protein;(source:Araport11)	NA	A3	AT4G39150_P1	AT4G39150_c1	WT_24h	WT_3h
AT4G39150	DNAJ heat shock N-terminal domain-containing protein;(source:Araport11)	NA	A5	AT4G39150_P1	AT4G39150_c1	WT_24h	WT_3h
AT4G39150	DNAJ heat shock N-terminal domain-containing protein;(source:Araport11)	NA	MES	AT4G39150_P1	AT4G39150_c1	WT_24h	WT_3h
AT4G39540	Encodes a shikimate kinase. Its transcripts appear to be expressed in vegetative tissues and developing embryos. SK2 transcript levels rise in response to Phytophthora infestans spores. SK2 is believed to be localized to the chloroplast.	ATSK2,SK2	IR	AT4G39540_ID7	AT4G39540_ID5	WT_24h	WT_3h
AT4G40000	S-adenosyl-L-methionine-dependent methyltransferases superfamily protein;(source:Araport11)	AtTRM4a,TRM4A	IR	AT4G40000_ID7	AT4G40000_P1	WT_24h	WT_3h
AT5G02040	prenylated RAB acceptor 1.A1;(source:Araport11)	PRA1.A1	A3	AT5G02040.1	AT5G02040_ID2	WT_24h	WT_3h
AT5G02480	HSP20-like chaperones superfamily protein;(source:Araport11)	NA	IR	AT5G02480_P1	AT5G02480_c2	WT_24h	WT_3h
AT5G02540	NAD(P)-binding Rossmann-fold superfamily protein;(source:Araport11)	NA	A3	AT5G02540_P1	AT5G02540_ID2	WT_24h	WT_3h
AT5G02790	GST functions in reductive deglutathionylation of glutathione conjugates of quercetin.	GSTL3	IR	AT5G02790_ID8	AT5G02790.1	WT_24h	WT_3h
AT5G04140	Encodes a gene whose sequence is similar to ferredoxin dependent glutamate synthase (Fd-GOGAT). Expression in leaves is induced by light and sucrose. Proposed to be involved in photorespiration and nitrogen assimilation. The mRNA is cell-to-cell mobile.	FD-GOGAT,GLS1,GLU1,GLUS	IR	AT5G04140_P1	AT5G04140_s1	WT_24h	WT_3h
AT5G04140	Encodes a gene whose sequence is similar to ferredoxin dependent glutamate synthase (Fd-GOGAT). Expression in leaves is induced by light and sucrose. Proposed to be involved in photorespiration and nitrogen assimilation. The mRNA is cell-to-cell mobile.	FD-GOGAT,GLS1,GLU1,GLUS	A3	AT5G04140_P1	AT5G04140_s2	WT_24h	WT_3h
AT5G04140	Encodes a gene whose sequence is similar to ferredoxin dependent glutamate synthase (Fd-GOGAT). Expression in leaves is induced by light and sucrose. Proposed to be involved in photorespiration and nitrogen assimilation. The mRNA is cell-to-cell mobile.	FD-GOGAT,GLS1,GLU1,GLUS	A5	AT5G04140_P1	AT5G04140_s2	WT_24h	WT_3h
AT5G04140	Encodes a gene whose sequence is similar to ferredoxin dependent glutamate synthase (Fd-GOGAT). Expression in leaves is induced by light and sucrose. Proposed to be involved in photorespiration and nitrogen assimilation. The mRNA is cell-to-cell mobile.	FD-GOGAT,GLS1,GLU1,GLUS	ES	AT5G04140_P1	AT5G04140_s2	WT_24h	WT_3h
AT5G04885	Encodes a beta-glucosidase involved in xyloglucan metabolism.	BGLC3	IR	AT5G04885_P3	AT5G04885_P1	WT_24h	WT_3h
AT5G05360	hypothetical protein;(source:Araport11)	NA	IR	AT5G05360_P1	AT5G05360.2	WT_24h	WT_3h
AT5G05620	Paralog of TUBG1, required for centrosomal and noncentrosomal microtubule nucleation. Involved in specification of cell identity, such as stomatal patterning. Constitutively expressed throughout plant. Enriched at the post-cytokinetic cell edges in leaves and roots.	ATGCP2,GCP2,TUBG2	A3	AT5G05620_P1	AT5G05620_c4	WT_24h	WT_3h
AT5G05620	Paralog of TUBG1, required for centrosomal and noncentrosomal microtubule nucleation. Involved in specification of cell identity, such as stomatal patterning. Constitutively expressed throughout plant. Enriched at the post-cytokinetic cell edges in leaves and roots.	ATGCP2,GCP2,TUBG2	A5	AT5G05620_P1	AT5G05620_c4	WT_24h	WT_3h
AT5G05620	Paralog of TUBG1, required for centrosomal and noncentrosomal microtubule nucleation. Involved in specification of cell identity, such as stomatal patterning. Constitutively expressed throughout plant. Enriched at the post-cytokinetic cell edges in leaves and roots.	ATGCP2,GCP2,TUBG2	MES	AT5G05620_P1	AT5G05620_c4	WT_24h	WT_3h
AT5G06050	Putative methyltransferase family protein;(source:Araport11)	NA	IR	AT5G06050_JS1	AT5G06050.1	WT_24h	WT_3h
AT5G06265	hyaluronan mediated motility receptor-like protein;(source:Araport11)	NA	A5	AT5G06265_s2	AT5G06265_ID47	WT_24h	WT_3h
AT5G06265	hyaluronan mediated motility receptor-like protein;(source:Araport11)	NA	A3	AT5G06265_s2	AT5G06265_P1	WT_24h	WT_3h
AT5G06265	hyaluronan mediated motility receptor-like protein;(source:Araport11)	NA	ES	AT5G06265_P2	AT5G06265_P1	WT_24h	WT_3h
AT5G06265	hyaluronan mediated motility receptor-like protein;(source:Araport11)	NA	ES	AT5G06265_s2	AT5G06265_P1	WT_24h	WT_3h
AT5G06265	hyaluronan mediated motility receptor-like protein;(source:Araport11)	NA	IR	AT5G06265_P2	AT5G06265_P1	WT_24h	WT_3h
AT5G06980	Member of a small gene family. Appears to be clock regulated.Somewhat redundant with LNK1/2 though more like LNK3 in having affects on biomass accumulation and phototrophism.	LNK4	A3	AT5G06980_c1	AT5G06980.2	WT_24h	WT_3h
AT5G07300	Encodes a copine-like protein, which is a member of a newly identified class of calcium-dependent, phospholipid binding proteins that are present in a wide range of organisms.	BON2	IR	AT5G07300_P1	AT5G07300_c1	WT_24h	WT_3h
AT5G07920	Encodes a putative diacylglycerol kinase that is mainly expressed in roots, shoots and leaves, but its enzyme product was not active in vitro.	ATDGK1,DGK1	A3	AT5G07920_P1	AT5G07920_s1	WT_24h	WT_3h
AT5G09330	NAC domain containing protein 82;(source:Araport11)	ANAC082,NAC082,VNI1	A3	AT5G09330_P5	AT5G09330_P1	WT_24h	WT_3h
AT5G09330	NAC domain containing protein 82;(source:Araport11)	ANAC082,NAC082,VNI1	IR	AT5G09330_P5	AT5G09330_P1	WT_24h	WT_3h
AT5G09820	Encodes fibrillin 5 (FBN5). Located in chloroplast stroma. Essential for plastoquinone-9 biosynthesis. Stimulates enzymatic activity of solanesyl diphosphate synthases (SPS) 1 and 2 through binding to solanesyl moiety. Two splicing variants, named FBN5-A shorter one and FBN5-B longer one. FBN5-B is the protein detected in chloroplast stroma. Involved in plastoquinone biosynthesis.	FBN5	IR	AT5G09820_ID9	AT5G09820_P2	WT_24h	WT_3h
AT5G10060	ENTH/VHS family protein;(source:Araport11)	NA	IR	AT5G10060_ID6	AT5G10060_P1	WT_24h	WT_3h
AT5G10930	Encodes CBL-interacting protein kinase 5 (CIPK5).	CIPK5,SnRK3.24	IR	AT5G10930_P1	AT5G10930_c1	WT_24h	WT_3h
AT5G10940	ASG2 is farnesylated protein and this post-translational modification impacts its subcellular localization. It is the homolog of the human anti-obesity factor WDTC1 and is involved in the negative regulation of fatty acid biosynthesis. The non-farnesylated form displays a nucleo-cytosolic subcellular localization. The farnesylated form displays a cytosolic subcellular localization. Interaction wi…	ASG2	A5	AT5G10940_P2	AT5G10940_s4	WT_24h	WT_3h
AT5G10980	Histone superfamily protein;(source:Araport11)	H3.3,HTR8	A3	AT5G10980_P1	AT5G10980_ID1	WT_24h	WT_3h
AT5G10980	Histone superfamily protein;(source:Araport11)	H3.3,HTR8	A5	AT5G10980_P1	AT5G10980_ID1	WT_24h	WT_3h
AT5G11030	alf4-1 mutation blocks initiation of lateral roots as well as callus formation. Cannot be rescued by IAA. Protein belongs to a plant-specific gene family and is localized to the nucleus.	ALF4	A5	AT5G11030_P1	AT5G11030_ID39	WT_24h	WT_3h
AT5G11030	alf4-1 mutation blocks initiation of lateral roots as well as callus formation. Cannot be rescued by IAA. Protein belongs to a plant-specific gene family and is localized to the nucleus.	ALF4	ES	AT5G11030_P1	AT5G11030_ID39	WT_24h	WT_3h
AT5G11030	alf4-1 mutation blocks initiation of lateral roots as well as callus formation. Cannot be rescued by IAA. Protein belongs to a plant-specific gene family and is localized to the nucleus.	ALF4	IR	AT5G11030_P1	AT5G11030_ID39	WT_24h	WT_3h
AT5G13410	FKBP-like peptidyl-prolyl cis-trans isomerase family protein;(source:Araport11)	NA	IR	AT5G13410_P1	AT5G13410_P2	WT_24h	WT_3h
AT5G13630	Encodes magnesium chelatase involved in plastid-to-nucleus signal transduction.	ABAR,CCH,CCH1,CHLH,GUN5	A3	AT5G13630_P1	AT5G13630_s1	WT_24h	WT_3h
AT5G13630	Encodes magnesium chelatase involved in plastid-to-nucleus signal transduction.	ABAR,CCH,CCH1,CHLH,GUN5	A5	AT5G13630_P1	AT5G13630_s1	WT_24h	WT_3h
AT5G13630	Encodes magnesium chelatase involved in plastid-to-nucleus signal transduction.	ABAR,CCH,CCH1,CHLH,GUN5	MES	AT5G13630_P1	AT5G13630_s1	WT_24h	WT_3h
AT5G14700	NAD(P)-binding Rossmann-fold superfamily protein;(source:Araport11)	NA	IR	AT5G14700_P1	AT5G14700_ID1	WT_24h	WT_3h
AT5G14700	NAD(P)-binding Rossmann-fold superfamily protein;(source:Araport11)	NA	IR	AT5G14700_s1	AT5G14700_ID1	WT_24h	WT_3h
AT5G14700	NAD(P)-binding Rossmann-fold superfamily protein;(source:Araport11)	NA	IR	AT5G14700_s1	AT5G14700_P2	WT_24h	WT_3h
AT5G14700	NAD(P)-binding Rossmann-fold superfamily protein;(source:Araport11)	NA	IR	AT5G14700_s1	AT5G14700_s2	WT_24h	WT_3h
AT5G14740	Encodes a beta carbonic anhydrase likely to be localized in the cytoplasm. Expression of its mRNA is seen in etiolated seedlings and points to a possible nonphotosynthetic role for this isoform.	BETA_CA2,CA18,CA2	IR	AT5G14740_P9	AT5G14740_P6	WT_24h	WT_3h
AT5G15120	2-aminoethanethiol dioxygenase, putative (DUF1637);(source:Araport11)	PCO1	IR	AT5G15120_ID2	AT5G15120_P1	WT_24h	WT_3h
AT5G15310	Member of the R2R3 factor gene family; MIXTA-like transcription factor that controls trichome maturation and cuticle formation.	ATMIXTA,ATMYB16,MYB16	IR	AT5G15310_P1	AT5G15310_P3	WT_24h	WT_3h
AT5G16540	Encodes a zinc finger protein.	ZFN3	IR	AT5G16540_P4	AT5G16540_ID6	WT_24h	WT_3h
AT5G16680	PHD protein which cooperates with AIPP2 and BAH domain protein AIPP3 to read H3K4 histone marks. The BAH-PHD bivalent histone reader complex silences a substantial subset of H3K27me3-enriched loci, including development and stress response-related genes. Interacts with BDT1, acts with other PHD proteins to associate with flowering genes and thereby suppress their transcription.	NA	IR	AT5G16680_P2	AT5G16680_P1	WT_24h	WT_3h
AT5G17040	UDP-Glycosyltransferase superfamily protein;(source:Araport11)	NA	A3	AT5G17040_P1	AT5G17040_P2	WT_24h	WT_3h
AT5G17570	TatD related DNase;(source:Araport11)	NA	A3	AT5G17570_ID4	AT5G17570_ID3	WT_24h	WT_3h
AT5G17570	TatD related DNase;(source:Araport11)	NA	IR	AT5G17570_ID4	AT5G17570_ID3	WT_24h	WT_3h
AT5G18100	A putative peroxisomal CuZnSOD inducible by a high-light pulse.	CSD3	IR	AT5G18100_ID5	AT5G18100.1	WT_24h	WT_3h
AT5G18500	Protein kinase superfamily protein;(source:Araport11)	NA	IR	AT5G18500_P1	AT5G18500_P2	WT_24h	WT_3h
AT5G18610	Encodes a receptor-like cytoplasmic kinase that is an immediate downstream component of the chitin receptor CERK1 and contributes to the regulation of chitin-induced immunity.	PBL27	A3	AT5G18610_P2	AT5G18610.1	WT_24h	WT_3h
AT5G18610	Encodes a receptor-like cytoplasmic kinase that is an immediate downstream component of the chitin receptor CERK1 and contributes to the regulation of chitin-induced immunity.	PBL27	IR	AT5G18610_P2	AT5G18610.1	WT_24h	WT_3h
AT5G18610	Encodes a receptor-like cytoplasmic kinase that is an immediate downstream component of the chitin receptor CERK1 and contributes to the regulation of chitin-induced immunity.	PBL27	IR	AT5G18610_P2	AT5G18610.2	WT_24h	WT_3h
AT5G19090	Heavy metal transport/detoxification superfamily protein;(source:Araport11)	NA	A3	AT5G19090_P1	AT5G19090_c1	WT_24h	WT_3h
AT5G19090	Heavy metal transport/detoxification superfamily protein;(source:Araport11)	NA	A3	AT5G19090.2	AT5G19090_c1	WT_24h	WT_3h
AT5G19090	Heavy metal transport/detoxification superfamily protein;(source:Araport11)	NA	A5	AT5G19090.2	AT5G19090_c1	WT_24h	WT_3h
AT5G19090	Heavy metal transport/detoxification superfamily protein;(source:Araport11)	NA	A5	AT5G19090_P1	AT5G19090_c1	WT_24h	WT_3h
AT5G19090	Heavy metal transport/detoxification superfamily protein;(source:Araport11)	NA	IR	AT5G19090_P1	AT5G19090_c1	WT_24h	WT_3h
AT5G19670	Exostosin family protein;(source:Araport11)	NA	A3	AT5G19670_ID1	AT5G19670_P1	WT_24h	WT_3h
AT5G19900	PRLI-interacting factor;(source:Araport11)	NA	ES	AT5G19900_P3	AT5G19900_c1	WT_24h	WT_3h
AT5G19900	PRLI-interacting factor;(source:Araport11)	NA	IR	AT5G19900_P3	AT5G19900_c1	WT_24h	WT_3h
AT5G19900	PRLI-interacting factor;(source:Araport11)	NA	IR	AT5G19900_P3	AT5G19900_P1	WT_24h	WT_3h
AT5G20300	Encodes Toc90, part of the TOC (translocon at the outer chloroplast membrane) machinery involved in the import of nucleus-encoded proteins into the chloroplast.	Toc90	A5	AT5G20300_P4	AT5G20300_P1	WT_24h	WT_3h
AT5G20300	Encodes Toc90, part of the TOC (translocon at the outer chloroplast membrane) machinery involved in the import of nucleus-encoded proteins into the chloroplast.	Toc90	ES	AT5G20300_P4	AT5G20300_P1	WT_24h	WT_3h
AT5G20300	Encodes Toc90, part of the TOC (translocon at the outer chloroplast membrane) machinery involved in the import of nucleus-encoded proteins into the chloroplast.	Toc90	IR	AT5G20300_P4	AT5G20300_P1	WT_24h	WT_3h
AT5G20920	protein synthesis initiation factor eIF2 beta	eIF-2bs,EIF2_BETA,EMB1401	A3	AT5G20920_P1	AT5G20920.2	WT_24h	WT_3h
AT5G20980	Encodes a plastidic methionine synthase, involved in methionine de novo synthesis in the chloroplast	ATMS3,MS3	A3	AT5G20980.2	AT5G20980_P1	WT_24h	WT_3h
AT5G20980	Encodes a plastidic methionine synthase, involved in methionine de novo synthesis in the chloroplast	ATMS3,MS3	IR	AT5G20980.2	AT5G20980_P1	WT_24h	WT_3h
AT5G20990	Involved in molybdenum cofactor (Moco) biosynthesis, inserting Mo into Molybdopterin. sir loss-of-function mutants are resistant to sirtinol, a modulator of auxin signaling.	B73,CHL6,CNX,CNX1,SIR4	A3	AT5G20990_P1	AT5G20990_ID7	WT_24h	WT_3h
AT5G21222	protein kinase family protein;(source:Araport11)	NA	ES	AT5G21222_P1	AT5G21222_P2	WT_24h	WT_3h
AT5G21222	protein kinase family protein;(source:Araport11)	NA	IR	AT5G21222_P1	AT5G21222_P2	WT_24h	WT_3h
AT5G21430	Chaperone DnaJ-domain superfamily protein;(source:Araport11)	CRRL,NdhU	A3	AT5G21430_s1	AT5G21430_P1	WT_24h	WT_3h
AT5G22010	Encodes RFC1, the largest subunit of replication factor C. Mediates genomic stability and transcriptional gene silencing.	AtRFC1,RFC1,RFC1	IR	AT5G22010_ID109	AT5G22010_ID41	WT_24h	WT_3h
AT5G22010	Encodes RFC1, the largest subunit of replication factor C. Mediates genomic stability and transcriptional gene silencing.	AtRFC1,RFC1,RFC1	IR	AT5G22010_P1	AT5G22010_ID41	WT_24h	WT_3h
AT5G22110	Encodes a protein with similarity to DNA polymerase epsilon subunit B an essential gene that is required for DNA replication. Homozygous mutants are embryo lethal. Expressed in meristematic , rapidly dividing regions.	ATDPB2,CYL2,DPB2	A3	AT5G22110_P1	AT5G22110_ID3	WT_24h	WT_3h
AT5G22450	SAGA complex subunit. Regulates gene expression by affecting histone H3 acetylation.	NA	IR	AT5G22450.1	AT5G22450_c5	WT_24h	WT_3h
AT5G22770	AP-2 complex subunit alpha-1. Part of endomembrane trafficking system.	alpha-ADR,AP2A1	A3	AT5G22770_P4	AT5G22770_s4	WT_24h	WT_3h
AT5G23490	hypothetical protein;(source:Araport11)	NA	IR	AT5G23490_P2	AT5G23490_P1	WT_24h	WT_3h
AT5G24120	Encodes a specialized sigma factor that functions in regulation of plastid genes and is responsible for the light-dependent transcription at the psbD LRP. Activation of SIG5 is dependent upon blue light and mediated by cryptochromes.	ATSIG5,SIG5,SIGE	IR	AT5G24120_P1	AT5G24120_c2	WT_24h	WT_3h
AT5G24155	FAD/NAD(P)-binding oxidoreductase family protein;(source:Araport11)	NA	IR	AT5G24155_P3	AT5G24155_P2	WT_24h	WT_3h
AT5G24520	Required for the accumulation of purple anthocyanins in leaves and stems. Involved in trichome and root hair development. Controls epidermal cell fate specification. Affects dihydroflavonol 4-reductase gene expression. It is thought that a ternary complex composed of TT2, TT8 and TTG1 is necessary for correct expression of BAN in seed endothelium. Based on clonal analysis and other methonds TTG1 …	ATTTG1,TTG,TTG1,URM23	IR	AT5G24520_P1	AT5G24520_P3	WT_24h	WT_3h
AT5G24810	ABC1 family protein;(source:Araport11)	NA	IR	AT5G24810_P1	AT5G24810_ID11	WT_24h	WT_3h
AT5G25150	Encodes a putative TATA-binding-protein associated factor TAF5. TAFs are subunits of the general transcription factor IID (TFIID).	TAF5	IR	AT5G25150_P1	AT5G25150_P2	WT_24h	WT_3h
AT5G25760	mutant displays sucrose-dependent seedling development and reduced lateral root production. PEX4 interacts with PEX22 in a yeast two-hybrid. Necessary for peroxisome biogenesis. The PEX4 and PEX22 pair may be important during the remodeling of peroxisome matrix contents as glyoxysomes transition to leaf peroxisomes.	PEX4,UBC21	IR	AT5G25760_ID1	AT5G25760.1	WT_24h	WT_3h
AT5G26280	TRAF-like family protein;(source:Araport11)	NA	A3	AT5G26280_P3	AT5G26280_c2	WT_24h	WT_3h
AT5G26570	chloroplastidic phosphoglucan, water dikinase (PWD) which is required for normal degradation of leaf starch in Arabidopsis. NMR analysis of the mutants, suggests that the gene is specifically involved in the phosphorylation of the glucosyl residues of starch at the C3 position.	ATGWD3,OK1,PWD	A5	AT5G26570_P1	AT5G26570_JC5	WT_24h	WT_3h
AT5G27300	pentatricopeptide (PPR) repeat-containing protein;(source:Araport11)	NA	A3	AT5G27300_JS14	AT5G27300_P1	WT_24h	WT_3h
AT5G27300	pentatricopeptide (PPR) repeat-containing protein;(source:Araport11)	NA	A3	AT5G27300_JS7	AT5G27300_P1	WT_24h	WT_3h
AT5G27300	pentatricopeptide (PPR) repeat-containing protein;(source:Araport11)	NA	IR	AT5G27300_JS14	AT5G27300_P1	WT_24h	WT_3h
AT5G27300	pentatricopeptide (PPR) repeat-containing protein;(source:Araport11)	NA	IR	AT5G27300_JS7	AT5G27300_P1	WT_24h	WT_3h
AT5G27300	pentatricopeptide (PPR) repeat-containing protein;(source:Araport11)	NA	MES	AT5G27300_JS7	AT5G27300_P1	WT_24h	WT_3h
AT5G27300	pentatricopeptide (PPR) repeat-containing protein;(source:Araport11)	NA	MES	AT5G27300_JS14	AT5G27300_P1	WT_24h	WT_3h
AT5G27640	encodes a member of eukaryotic translation initiation factor 3B family.	ATEIF3B-1,ATTIF3B1,EIF3B,EIF3B-1,TIF3B1	IR	AT5G27640.1	AT5G27640_ID4	WT_24h	WT_3h
AT5G27830	Folate receptor family protein;(source:Araport11).Expression correlates with increase in bound folate in planta.	NA	A3	AT5G27830.4	AT5G27830.5	WT_24h	WT_3h
AT5G27830	Folate receptor family protein;(source:Araport11).Expression correlates with increase in bound folate in planta.	NA	A3	AT5G27830_P1	AT5G27830.5	WT_24h	WT_3h
AT5G27830	Folate receptor family protein;(source:Araport11).Expression correlates with increase in bound folate in planta.	NA	IR	AT5G27830.4	AT5G27830.5	WT_24h	WT_3h
AT5G27830	Folate receptor family protein;(source:Araport11).Expression correlates with increase in bound folate in planta.	NA	A3	AT5G27830.4	AT5G27830_P6	WT_24h	WT_3h
AT5G27830	Folate receptor family protein;(source:Araport11).Expression correlates with increase in bound folate in planta.	NA	IR	AT5G27830.4	AT5G27830_P6	WT_24h	WT_3h
AT5G28290	Encodes AtNek3, a member of the NIMA-related serine/threonine kinases (Neks) that have been linked to cell-cycle regulation in fungi and mammals. Plant Neks might be involved in plant development processes.	ATNEK3,NEK3	A5	AT5G28290_P1	AT5G28290_s1	WT_24h	WT_3h
AT5G34940	The protein is predicted (WoLF PSORT program) to be membrane-associated.	AtGUS3,GUS3	IR	AT5G34940.1	AT5G34940.2	WT_24h	WT_3h
AT5G34940	The protein is predicted (WoLF PSORT program) to be membrane-associated.	AtGUS3,GUS3	IR	AT5G34940_ID1	AT5G34940.2	WT_24h	WT_3h
AT5G35170	adenylate kinase family protein;(source:Araport11)	NA	A3	AT5G35170_ID5	AT5G35170_P1	WT_24h	WT_3h
AT5G35170	adenylate kinase family protein;(source:Araport11)	NA	IR	AT5G35170_ID5	AT5G35170_P1	WT_24h	WT_3h
AT5G36180	serine carboxypeptidase-like 1;(source:Araport11)	scpl1	IR	AT5G36180_ID4	AT5G36180_P3	WT_24h	WT_3h
AT5G36180	serine carboxypeptidase-like 1;(source:Araport11)	scpl1	IR	AT5G36180_P2	AT5G36180_P3	WT_24h	WT_3h
AT5G36180	serine carboxypeptidase-like 1;(source:Araport11)	scpl1	IR	AT5G36180_P1	AT5G36180_P3	WT_24h	WT_3h
AT5G37180	Encodes a protein with sucrose synthase activity (SUS5).	ATSUS5,SUS5	A3	AT5G37180_P1	AT5G37180.1	WT_24h	WT_3h
AT5G37290	ARM repeat superfamily protein;(source:Araport11)	NA	A3	AT5G37290_P2	AT5G37290_ID5	WT_24h	WT_3h
AT5G37290	ARM repeat superfamily protein;(source:Araport11)	NA	IR	AT5G37290_P2	AT5G37290_P1	WT_24h	WT_3h
AT5G37380	J-domain protein, recruited by MBD5 and 6; acts as a transcriptional repressor. The conserved J-domain motif is required for its interaction with HSP70s and for its silencing function.	NA	ES	AT5G37380_P2	AT5G37380_P8	WT_24h	WT_3h
AT5G37380	J-domain protein, recruited by MBD5 and 6; acts as a transcriptional repressor. The conserved J-domain motif is required for its interaction with HSP70s and for its silencing function.	NA	IR	AT5G37380_P2	AT5G37380_P8	WT_24h	WT_3h
AT5G37500	Encodes a guard cell outward potassium channel. Belongs to the Shaker family K+ channel. This family includes five groups based on phylogenetic analysis (FEBS Letters (2007) 581: 2357): I (inward rectifying channel): AKT1 (AT2G26650), AKT5 (AT4G32500) and SPIK (also known as AKT6, AT2G25600); II (inward rectifying channel): KAT1 (AT5G46240) and KAT2 (AT4G18290); III (weakly inward rectifying chan…	GORK	IR	AT5G37500_P4	AT5G37500_P2	WT_24h	WT_3h
AT5G37510	Encodes a subunit of the 400 kDa subcomplex of the mitochondrial NADH dehydrogenase (complex I). The protein has been isolated in the male gametophyte. The mRNA is cell-to-cell mobile.	CI76,EMB1467	A3	AT5G37510_P1	AT5G37510_ID3	WT_24h	WT_3h
AT5G37510	Encodes a subunit of the 400 kDa subcomplex of the mitochondrial NADH dehydrogenase (complex I). The protein has been isolated in the male gametophyte. The mRNA is cell-to-cell mobile.	CI76,EMB1467	A5	AT5G37510_P1	AT5G37510_ID3	WT_24h	WT_3h
AT5G37510	Encodes a subunit of the 400 kDa subcomplex of the mitochondrial NADH dehydrogenase (complex I). The protein has been isolated in the male gametophyte. The mRNA is cell-to-cell mobile.	CI76,EMB1467	MES	AT5G37510_P1	AT5G37510_ID3	WT_24h	WT_3h
AT5G38360	alpha/beta-Hydrolases superfamily protein;(source:Araport11)	NA	A3	AT5G38360_ID7	AT5G38360_ID9	WT_24h	WT_3h
AT5G38360	alpha/beta-Hydrolases superfamily protein;(source:Araport11)	NA	IR	AT5G38360_P2	AT5G38360_ID9	WT_24h	WT_3h
AT5G38360	alpha/beta-Hydrolases superfamily protein;(source:Araport11)	NA	IR	AT5G38360_ID7	AT5G38360_ID9	WT_24h	WT_3h
AT5G38660	mutant has Altered acclimation responses;	APE1	A3	AT5G38660.2	AT5G38660_P1	WT_24h	WT_3h
AT5G38660	mutant has Altered acclimation responses;	APE1	A5	AT5G38660.2	AT5G38660_P1	WT_24h	WT_3h
AT5G38660	mutant has Altered acclimation responses;	APE1	IR	AT5G38660.2	AT5G38660_P1	WT_24h	WT_3h
AT5G39830	Encodes DEG8. Forms a hexamer with DEG5 in the thylakoid lumen. Involved in the cleavage of photodamaged D2 protein of photosystem II (PSII). Recombinant DEG8 is proteolytically active toward both a model substrate (beta-casein) and photodamaged D1 protein of photosystem II.	DEG8,DEGP8	A5	AT5G39830_s1	AT5G39830_P1	WT_24h	WT_3h
AT5G41000	Arabidopsis thaliana metal-nicotianamine transporter YSL4	AtYSL4,YSL4	A3	AT5G41000_ID1	AT5G41000_P1	WT_24h	WT_3h
AT5G41000	Arabidopsis thaliana metal-nicotianamine transporter YSL4	AtYSL4,YSL4	IR	AT5G41000_ID1	AT5G41000_P1	WT_24h	WT_3h
AT5G42180	Peroxidase required for casparian strip lignification as well as partially required for SGN-dependent compensatory lignification.	PER64,PRX64	A3	AT5G42180_ID2	AT5G42180_P1	WT_24h	WT_3h
AT5G42180	Peroxidase required for casparian strip lignification as well as partially required for SGN-dependent compensatory lignification.	PER64,PRX64	A5	AT5G42180_ID2	AT5G42180_P1	WT_24h	WT_3h
AT5G42210	Major facilitator superfamily protein;(source:Araport11)	NA	A3	AT5G42210_c1	AT5G42210_ID14	WT_24h	WT_3h
AT5G42210	Major facilitator superfamily protein;(source:Araport11)	NA	A3	AT5G42210_JS3	AT5G42210_ID14	WT_24h	WT_3h
AT5G42210	Major facilitator superfamily protein;(source:Araport11)	NA	IR	AT5G42210_JS3	AT5G42210_ID14	WT_24h	WT_3h
AT5G42210	Major facilitator superfamily protein;(source:Araport11)	NA	IR	AT5G42210_c1	AT5G42210_ID14	WT_24h	WT_3h
AT5G42210	Major facilitator superfamily protein;(source:Araport11)	NA	IR	AT5G42210_c1	AT5G42210_P2	WT_24h	WT_3h
AT5G42210	Major facilitator superfamily protein;(source:Araport11)	NA	IR	AT5G42210_JS3	AT5G42210_P2	WT_24h	WT_3h
AT5G42400	Encodes ATXR7 (ARABIDOPSIS TRITHORAX-RELATED7), required for histone H3-K4 methylation and for transcriptional activation of Flowering Locus C.	ATXR7,SDG25	A3	AT5G42400_JS34	AT5G42400_JC10	WT_24h	WT_3h
AT5G42400	Encodes ATXR7 (ARABIDOPSIS TRITHORAX-RELATED7), required for histone H3-K4 methylation and for transcriptional activation of Flowering Locus C.	ATXR7,SDG25	A5	AT5G42400_JS34	AT5G42400_JC10	WT_24h	WT_3h
AT5G42400	Encodes ATXR7 (ARABIDOPSIS TRITHORAX-RELATED7), required for histone H3-K4 methylation and for transcriptional activation of Flowering Locus C.	ATXR7,SDG25	IR	AT5G42400_JS34	AT5G42400_JC10	WT_24h	WT_3h
AT5G42920	Encodes a component of the putative Arabidopsis THO/TREX complex: THO1 or HPR1 (At5g09860), THO2 (At1g24706), THO3 or TEX1 (At5g56130), THO5 (At5g42920, At1g45233), THO6 (At2g19430), and THO7 (At5g16790, At3g02950). THO/TREX complexes in animals have been implicated in the transport of mRNA precursors. Mutants of THO3/TEX1, THO1, THO6 accumulate reduced amount of small interfering (si)RNA, sugges…	AtTHO5,THO5	IR	AT5G42920_P1	AT5G42920_P2	WT_24h	WT_3h
AT5G43710	Glycosyl hydrolase family 47 protein;(source:Araport11)	MNS4	A3	AT5G43710_JC12	AT5G43710_s6	WT_24h	WT_3h
AT5G43710	Glycosyl hydrolase family 47 protein;(source:Araport11)	MNS4	A5	AT5G43710_JC12	AT5G43710_s6	WT_24h	WT_3h
AT5G43710	Glycosyl hydrolase family 47 protein;(source:Araport11)	MNS4	IR	AT5G43710_JC12	AT5G43710_s6	WT_24h	WT_3h
AT5G43990	Encodes SUVR2, one of the four closely related Arabidopsis SUVR proteins that belong to the SU(VAR)3-9 subgroup of SET-domain proteins. Proteins containing the evolutionarily conserved SET domain are involved in regulation of eukaryotic gene expression and chromatin structure through their histone lysine methyltransferase (HMTase) activity. SUVR1, SUVR2 and SUVR4 proteins contain a novel domain a…	SDG18,SUVR2	A3	AT5G43990_P6	AT5G43990_P8	WT_24h	WT_3h
AT5G43990	Encodes SUVR2, one of the four closely related Arabidopsis SUVR proteins that belong to the SU(VAR)3-9 subgroup of SET-domain proteins. Proteins containing the evolutionarily conserved SET domain are involved in regulation of eukaryotic gene expression and chromatin structure through their histone lysine methyltransferase (HMTase) activity. SUVR1, SUVR2 and SUVR4 proteins contain a novel domain a…	SDG18,SUVR2	A3	AT5G43990_JC6	AT5G43990_P8	WT_24h	WT_3h
AT5G43990	Encodes SUVR2, one of the four closely related Arabidopsis SUVR proteins that belong to the SU(VAR)3-9 subgroup of SET-domain proteins. Proteins containing the evolutionarily conserved SET domain are involved in regulation of eukaryotic gene expression and chromatin structure through their histone lysine methyltransferase (HMTase) activity. SUVR1, SUVR2 and SUVR4 proteins contain a novel domain a…	SDG18,SUVR2	A3	AT5G43990_P9	AT5G43990_P8	WT_24h	WT_3h
AT5G43990	Encodes SUVR2, one of the four closely related Arabidopsis SUVR proteins that belong to the SU(VAR)3-9 subgroup of SET-domain proteins. Proteins containing the evolutionarily conserved SET domain are involved in regulation of eukaryotic gene expression and chromatin structure through their histone lysine methyltransferase (HMTase) activity. SUVR1, SUVR2 and SUVR4 proteins contain a novel domain a…	SDG18,SUVR2	A5	AT5G43990_JC6	AT5G43990_P8	WT_24h	WT_3h
AT5G43990	Encodes SUVR2, one of the four closely related Arabidopsis SUVR proteins that belong to the SU(VAR)3-9 subgroup of SET-domain proteins. Proteins containing the evolutionarily conserved SET domain are involved in regulation of eukaryotic gene expression and chromatin structure through their histone lysine methyltransferase (HMTase) activity. SUVR1, SUVR2 and SUVR4 proteins contain a novel domain a…	SDG18,SUVR2	A5	AT5G43990_P3	AT5G43990_P8	WT_24h	WT_3h
AT5G43990	Encodes SUVR2, one of the four closely related Arabidopsis SUVR proteins that belong to the SU(VAR)3-9 subgroup of SET-domain proteins. Proteins containing the evolutionarily conserved SET domain are involved in regulation of eukaryotic gene expression and chromatin structure through their histone lysine methyltransferase (HMTase) activity. SUVR1, SUVR2 and SUVR4 proteins contain a novel domain a…	SDG18,SUVR2	IR	AT5G43990_P4	AT5G43990_P8	WT_24h	WT_3h
AT5G43990	Encodes SUVR2, one of the four closely related Arabidopsis SUVR proteins that belong to the SU(VAR)3-9 subgroup of SET-domain proteins. Proteins containing the evolutionarily conserved SET domain are involved in regulation of eukaryotic gene expression and chromatin structure through their histone lysine methyltransferase (HMTase) activity. SUVR1, SUVR2 and SUVR4 proteins contain a novel domain a…	SDG18,SUVR2	IR	AT5G43990_P9	AT5G43990_P8	WT_24h	WT_3h
AT5G43990	Encodes SUVR2, one of the four closely related Arabidopsis SUVR proteins that belong to the SU(VAR)3-9 subgroup of SET-domain proteins. Proteins containing the evolutionarily conserved SET domain are involved in regulation of eukaryotic gene expression and chromatin structure through their histone lysine methyltransferase (HMTase) activity. SUVR1, SUVR2 and SUVR4 proteins contain a novel domain a…	SDG18,SUVR2	IR	AT5G43990_P3	AT5G43990_P8	WT_24h	WT_3h
AT5G43990	Encodes SUVR2, one of the four closely related Arabidopsis SUVR proteins that belong to the SU(VAR)3-9 subgroup of SET-domain proteins. Proteins containing the evolutionarily conserved SET domain are involved in regulation of eukaryotic gene expression and chromatin structure through their histone lysine methyltransferase (HMTase) activity. SUVR1, SUVR2 and SUVR4 proteins contain a novel domain a…	SDG18,SUVR2	IR	AT5G43990_JC6	AT5G43990_P8	WT_24h	WT_3h
AT5G44520	NagB/RpiA/CoA transferase-like superfamily protein;(source:Araport11)	NA	IR	AT5G44520_ID8	AT5G44520_P2	WT_24h	WT_3h
AT5G45330	decapping 5-like protein;(source:Araport11)	DCP5-L	IR	AT5G45330_P1	AT5G45330_s1	WT_24h	WT_3h
AT5G45370	nodulin MtN21-like transporter family protein	UMAMIT1	IR	AT5G45370_P2	AT5G45370_P4	WT_24h	WT_3h
AT5G45410	Plastid localized protein of unknown function. Mutants are more susceptible to P. syringae and produce less callose upon infection.	AtNHR2A	ES	AT5G45410_P1	AT5G45410_P5	WT_24h	WT_3h
AT5G45410	Plastid localized protein of unknown function. Mutants are more susceptible to P. syringae and produce less callose upon infection.	AtNHR2A	IR	AT5G45410_P1	AT5G45410_P5	WT_24h	WT_3h
AT5G45610	Encodes a homologue of the ATR-interacting protein ATRIP. Mutant (named sensitive to UV2 or suv2) is UVB-hypersensitive and defective in DNA damage response.	SUV2	A3	AT5G45610_P1	AT5G45610_ID1	WT_24h	WT_3h
AT5G45840	Encodes a leucine-rich-repeat RLK that is localized to the plasma membrane of pollen tubes and functions with MIK1/2 as the male receptor of the pollen tube chemo-attractant LURE1.MDIS1 forms a complex with MIK1/2 and binds LURE1.	MDIS1	A5	AT5G45840_JS2	AT5G45840_JS5	WT_24h	WT_3h
AT5G45840	Encodes a leucine-rich-repeat RLK that is localized to the plasma membrane of pollen tubes and functions with MIK1/2 as the male receptor of the pollen tube chemo-attractant LURE1.MDIS1 forms a complex with MIK1/2 and binds LURE1.	MDIS1	A5	AT5G45840_c1	AT5G45840_JS5	WT_24h	WT_3h
AT5G45840	Encodes a leucine-rich-repeat RLK that is localized to the plasma membrane of pollen tubes and functions with MIK1/2 as the male receptor of the pollen tube chemo-attractant LURE1.MDIS1 forms a complex with MIK1/2 and binds LURE1.	MDIS1	IR	AT5G45840_JS2	AT5G45840_JS5	WT_24h	WT_3h
AT5G45920	SGNH hydrolase-type esterase superfamily protein;(source:Araport11)	NA	IR	AT5G45920_P3	AT5G45920_P4	WT_24h	WT_3h
AT5G46430	Ribosomal protein L32e;(source:Araport11)	NA	A3	AT5G46430.2	AT5G46430_P1	WT_24h	WT_3h
AT5G46860	Syntaxin-related protein required for vacuolar assembly. A member of t-SNARE superfamily, homologous to yest Vam3p. Localized in the vacuolar membranes. The protein has a heptad repeat structure (residues164?220) in which hydrophobic amino acid residues appear at seven amino acid intervals. Such regions have a high potential to form an amphiphilic a-helix, intriguing for the intermolecular intera…	ATSYP22,ATVAM3,SGR3,SYP22,VAM3	A3	AT5G46860_P1	AT5G46860_c1	WT_24h	WT_3h
AT5G46860	Syntaxin-related protein required for vacuolar assembly. A member of t-SNARE superfamily, homologous to yest Vam3p. Localized in the vacuolar membranes. The protein has a heptad repeat structure (residues164?220) in which hydrophobic amino acid residues appear at seven amino acid intervals. Such regions have a high potential to form an amphiphilic a-helix, intriguing for the intermolecular intera…	ATSYP22,ATVAM3,SGR3,SYP22,VAM3	A5	AT5G46860_P1	AT5G46860_c1	WT_24h	WT_3h
AT5G46860	Syntaxin-related protein required for vacuolar assembly. A member of t-SNARE superfamily, homologous to yest Vam3p. Localized in the vacuolar membranes. The protein has a heptad repeat structure (residues164?220) in which hydrophobic amino acid residues appear at seven amino acid intervals. Such regions have a high potential to form an amphiphilic a-helix, intriguing for the intermolecular intera…	ATSYP22,ATVAM3,SGR3,SYP22,VAM3	ES	AT5G46860_P1	AT5G46860_c1	WT_24h	WT_3h
AT5G47020	MraZ;(source:Araport11)	NA	A5	AT5G47020_JS4	AT5G47020_P1	WT_24h	WT_3h
AT5G47020	MraZ;(source:Araport11)	NA	IR	AT5G47020_JS4	AT5G47020_P1	WT_24h	WT_3h
AT5G47180	Plant VAMP (vesicle-associated membrane protein) family protein;(source:Araport11)	NA	IR	AT5G47180_P2	AT5G47180_P1	WT_24h	WT_3h
AT5G47430	DWNN domain, a CCHC-type zinc finger;(source:Araport11)	NA	IR	AT5G47430_P1	AT5G47430_P4	WT_24h	WT_3h
AT5G47430	DWNN domain, a CCHC-type zinc finger;(source:Araport11)	NA	IR	AT5G47430_P1	AT5G47430_P6	WT_24h	WT_3h
AT5G47480	RGPR-related protein; SEC16A homolog. Part of endomembrane trafficking system.	MAG5	A3	AT5G47480_P1	AT5G47480_JC11	WT_24h	WT_3h
AT5G47730	Sec14p-like phosphatidylinositol transfer family protein;(source:Araport11)	NA	IR	AT5G47730_P1	AT5G47730_s1	WT_24h	WT_3h
AT5G47970	Aldolase-type TIM barrel family protein;(source:Araport11)	NA	A3	AT5G47970_ID1	AT5G47970_ID4	WT_24h	WT_3h
AT5G47970	Aldolase-type TIM barrel family protein;(source:Araport11)	NA	IR	AT5G47970_ID1	AT5G47970_P3	WT_24h	WT_3h
AT5G48610	myb-like protein X;(source:Araport11)	NA	A5	AT5G48610_P4	AT5G48610_P5	WT_24h	WT_3h
AT5G48610	myb-like protein X;(source:Araport11)	NA	IR	AT5G48610_P4	AT5G48610_P5	WT_24h	WT_3h
AT5G48760	Ribosomal protein L13 family protein;(source:Araport11)	NA	IR	AT5G48760_P1	AT5G48760_P2	WT_24h	WT_3h
AT5G48790	LOW PSII ACCUMULATION protein (DUF1995);(source:Araport11)	NA	IR	AT5G48790_ID3	AT5G48790_P1	WT_24h	WT_3h
AT5G49720	Encodes a membrane-bound endo-1,4-beta-D-glucanase, involved in cellulose biosynthesis. Loss-of-function mutants have severe cellulose-deficient phenotypes. During cell elongation, KOR1 is associated with Golgi apparatus and early endosome. Inhibition of cellulose biosynthesis promoted a redistribution of KOR1 in subcellular locations. These observations suggest that deposition of cellulose invol…	ATGH9A1,DEC,GH9A1,IRX2,KOR,KOR1,RSW2,TSD1	A3	AT5G49720_P1	AT5G49720_c1	WT_24h	WT_3h
AT5G49720	Encodes a membrane-bound endo-1,4-beta-D-glucanase, involved in cellulose biosynthesis. Loss-of-function mutants have severe cellulose-deficient phenotypes. During cell elongation, KOR1 is associated with Golgi apparatus and early endosome. Inhibition of cellulose biosynthesis promoted a redistribution of KOR1 in subcellular locations. These observations suggest that deposition of cellulose invol…	ATGH9A1,DEC,GH9A1,IRX2,KOR,KOR1,RSW2,TSD1	A5	AT5G49720_P1	AT5G49720_c1	WT_24h	WT_3h
AT5G49840	ATP-dependent Clp protease;(source:Araport11)	NA	A5	AT5G49840_ID4	AT5G49840_s2	WT_24h	WT_3h
AT5G49900	Beta-glucosidase, GBA2 type family protein;(source:Araport11)	NA	A5	AT5G49900_P3	AT5G49900_P1	WT_24h	WT_3h
AT5G49900	Beta-glucosidase, GBA2 type family protein;(source:Araport11)	NA	IR	AT5G49900_P3	AT5G49900_P1	WT_24h	WT_3h
AT5G50020	DHHC-type zinc finger family protein;(source:Araport11)	NA	IR	AT5G50020_P3	AT5G50020_ID12	WT_24h	WT_3h
AT5G50020	DHHC-type zinc finger family protein;(source:Araport11)	NA	IR	AT5G50020_P3	AT5G50020_P2	WT_24h	WT_3h
AT5G50340	DNA repair protein RadA-like protein;(source:Araport11)	NA	A3	AT5G50340_c2	AT5G50340_c1	WT_24h	WT_3h
AT5G50340	DNA repair protein RadA-like protein;(source:Araport11)	NA	IR	AT5G50340_c2	AT5G50340_c1	WT_24h	WT_3h
AT5G50340	DNA repair protein RadA-like protein;(source:Araport11)	NA	A3	AT5G50340_c2	AT5G50340_P2	WT_24h	WT_3h
AT5G50340	DNA repair protein RadA-like protein;(source:Araport11)	NA	IR	AT5G50340_c2	AT5G50340_P2	WT_24h	WT_3h
AT5G50340	DNA repair protein RadA-like protein;(source:Araport11)	NA	IR	AT5G50340_c2	AT5G50340_P3	WT_24h	WT_3h
AT5G50340	DNA repair protein RadA-like protein;(source:Araport11)	NA	IR	AT5G50340_c2	AT5G50340_s1	WT_24h	WT_3h
AT5G51430	Encodes a protein that is homologous to Cog7, a subunit of the conserved oligomeric Golgi (COG) complex, which is required for the normal morphology and function of the Golgi apparatus. It is likely to be involved in transport or retention of Golgi-localized proteins and in maintenance of Golgi morphology.	EYE	IR	AT5G51430_P1	AT5G51430_ID18	WT_24h	WT_3h
AT5G51620	Uncharacterized protein family (UPF0172);(source:Araport11)	NA	A3	AT5G51620_P4	AT5G51620_P1	WT_24h	WT_3h
AT5G51720	Encodes a protein with biochemical, structural, and biophysical characteristics of a NEET protein. It plays a key role in plant development, senescence, reactive oxygen homeostasis, and Fe metabolism.	At-NEET,NEET	IR	AT5G51720_ID1	AT5G51720_P1	WT_24h	WT_3h
AT5G51730	RNA-binding (RRM/RBD/RNP motifs) family protein;(source:Araport11)	NA	A5	AT5G51730_ID3	AT5G51730_JC7	WT_24h	WT_3h
AT5G51730	RNA-binding (RRM/RBD/RNP motifs) family protein;(source:Araport11)	NA	IR	AT5G51730_ID3	AT5G51730_JC7	WT_24h	WT_3h
AT5G51730	RNA-binding (RRM/RBD/RNP motifs) family protein;(source:Araport11)	NA	IR	AT5G51730_ID3	AT5G51730_P1	WT_24h	WT_3h
AT5G52310	cold regulated gene, the 5' region of cor78 has cis-acting regulatory elements that can impart cold-regulated gene expression The mRNA is cell-to-cell mobile.	COR78,LTI140,LTI78,RD29A	A3	AT5G52310_P1	AT5G52310_JC13	WT_24h	WT_3h
AT5G52310	cold regulated gene, the 5' region of cor78 has cis-acting regulatory elements that can impart cold-regulated gene expression The mRNA is cell-to-cell mobile.	COR78,LTI140,LTI78,RD29A	A3	AT5G52310_P1	AT5G52310_JC21	WT_24h	WT_3h
AT5G53340	Encodes a hydroxyproline O-galactosyltransferase.	HPGT1	A3	AT5G53340_P2	AT5G53340.1	WT_24h	WT_3h
AT5G53470	Encodes an acyl-CoA binding protein that is localized to vesicles,and plasma membrane especially in epidermal cells of heart, torpedo and cotyledon stage embryos, cell wall of the seed coat. Northern blot analysis showed that the 1.4 kb ACBP1 mRNA was expressed in silique, root, stem, leaf and flower.	ACBP,ACBP1,AtACBP1	ES	AT5G53470.1	AT5G53470_ID1	WT_24h	WT_3h
AT5G53860	Encodes a plant-specific protein with a domain similar to the central cysteine-rich domain of DnaJ proteins. It is involved in chloroplast and leaf development.	ANU7,EMB2737,EMB64	A3	AT5G53860.3	AT5G53860.2	WT_24h	WT_3h
AT5G53860	Encodes a plant-specific protein with a domain similar to the central cysteine-rich domain of DnaJ proteins. It is involved in chloroplast and leaf development.	ANU7,EMB2737,EMB64	A5	AT5G53860.3	AT5G53860.2	WT_24h	WT_3h
AT5G53860	Encodes a plant-specific protein with a domain similar to the central cysteine-rich domain of DnaJ proteins. It is involved in chloroplast and leaf development.	ANU7,EMB2737,EMB64	ES	AT5G53860.3	AT5G53860.2	WT_24h	WT_3h
AT5G55060	Rab3 GTPase-activating protein catalytic subunit;(source:Araport11)	NA	ES	AT5G55060_P1	AT5G55060.2	WT_24h	WT_3h
AT5G55100	SWAP (Suppressor-of-White-APricot)/surp domain-containing protein;(source:Araport11)	NA	IR	AT5G55100_ID21	AT5G55100_P8	WT_24h	WT_3h
AT5G55630	Encodes AtTPK1 (KCO1), a member of the Arabidopsis thaliana K+ channel family of AtTPK/KCO proteins. AtTPK1 is targeted to the vacuolar membrane. Forms homomeric ion channels in vivo. Voltage-independent and Ca2+-activated K+ channel. Activated by 14-3-3 proteins. Vacuolar K+-conducting TPC1 and TPK1/TPK3 channels act in concert to provide for Ca2+- and voltageinduced electrical excitability to t…	ATKCO1,ATTPK1,KCO1,KCO1,TPK1	IR	AT5G55630_ID2	AT5G55630.2	WT_24h	WT_3h
AT5G56320	member of Alpha-Expansin Gene Family. Naming convention from the Expansin Working Group (Kende et al, 2004. Plant Mol Bio)	ATEXP14,ATEXPA14,ATHEXP_ALPHA_1.5,EXP14,EXPA14	IR	AT5G56320_P2	AT5G56320_P3	WT_24h	WT_3h
AT5G56860	Encodes a member of the GATA factor family of zinc finger transcription factors. Modulate chlorophyll biosynthesis and glutamate synthase (GLU1/Fd-GOGAT) expression.	GATA21,GNC	IR	AT5G56860_P1	AT5G56860_s1	WT_24h	WT_3h
AT5G57290	60S acidic ribosomal protein family;(source:Araport11)	AtP3B,P3B	A3	AT5G57290_P1	AT5G57290.2	WT_24h	WT_3h
AT5G57290	60S acidic ribosomal protein family;(source:Araport11)	AtP3B,P3B	IR	AT5G57290_P1	AT5G57290.2	WT_24h	WT_3h
AT5G57565	Protein kinase superfamily protein;(source:Araport11)	NA	IR	AT5G57565_P1	AT5G57565_P2	WT_24h	WT_3h
AT5G57565	Protein kinase superfamily protein;(source:Araport11)	NA	A5	AT5G57565_P1	AT5G57565_P3	WT_24h	WT_3h
AT5G57655	xylose isomerase family protein;(source:Araport11)	NA	A3	AT5G57655_ID65	AT5G57655.1	WT_24h	WT_3h
AT5G57655	xylose isomerase family protein;(source:Araport11)	NA	A5	AT5G57655_ID65	AT5G57655.1	WT_24h	WT_3h
AT5G57655	xylose isomerase family protein;(source:Araport11)	NA	IR	AT5G57655_P2	AT5G57655.1	WT_24h	WT_3h
AT5G57655	xylose isomerase family protein;(source:Araport11)	NA	IR	AT5G57655_ID65	AT5G57655.1	WT_24h	WT_3h
AT5G57655	xylose isomerase family protein;(source:Araport11)	NA	A3	AT5G57655_P2	AT5G57655_ID60	WT_24h	WT_3h
AT5G57655	xylose isomerase family protein;(source:Araport11)	NA	A5	AT5G57655_P2	AT5G57655_ID60	WT_24h	WT_3h
AT5G57655	xylose isomerase family protein;(source:Araport11)	NA	ES	AT5G57655_ID65	AT5G57655_ID60	WT_24h	WT_3h
AT5G57655	xylose isomerase family protein;(source:Araport11)	NA	ES	AT5G57655_P2	AT5G57655_ID60	WT_24h	WT_3h
AT5G58540	Protein kinase superfamily protein;(source:Araport11)	NA	A3	AT5G58540.1	AT5G58540.2	WT_24h	WT_3h
AT5G58540	Protein kinase superfamily protein;(source:Araport11)	NA	A3	AT5G58540.3	AT5G58540.2	WT_24h	WT_3h
AT5G58540	Protein kinase superfamily protein;(source:Araport11)	NA	IR	AT5G58540.3	AT5G58540.2	WT_24h	WT_3h
AT5G58710	Encodes cyclophilin ROC7. The mRNA is cell-to-cell mobile.	ROC7	A3	AT5G58710.1	AT5G58710_ID1	WT_24h	WT_3h
AT5G58710	Encodes cyclophilin ROC7. The mRNA is cell-to-cell mobile.	ROC7	A5	AT5G58710.1	AT5G58710_ID1	WT_24h	WT_3h
AT5G58710	Encodes cyclophilin ROC7. The mRNA is cell-to-cell mobile.	ROC7	ES	AT5G58710.1	AT5G58710_ID1	WT_24h	WT_3h
AT5G58760	Encodes a DDB1a interacting protein DDB2 required for UV-B tolerance and genomic integrity.	DDB2	IR	AT5G58760_JS3	AT5G58760_P1	WT_24h	WT_3h
AT5G59130	Subtilase family protein;(source:Araport11)	NA	IR	AT5G59130_P3	AT5G59130_s4	WT_24h	WT_3h
AT5G60600	Encodes a chloroplast-localized hydroxy-2-methyl-2-(E)-butenyl 4-diphosphate (HMBPP) synthase (HDS), catalyzes the formation of HMBPP from 2-C-methyl-D-erythrytol 2,4-cyclodiphosphate (MEcPP). The HDS enzyme controls the penultimate steps of the biosynthesis of IPP and dimethylallyl diphosphate (DMAPP) via the MEP pathway and may serve as a metabolic control point for SA-mediated disease resistan…	CLB4,CSB3,GCPE,HDS,ISPG	IR	AT5G60600_ID13	AT5G60600_P1	WT_24h	WT_3h
AT5G60840	hypothetical protein;(source:Araport11)	NA	IR	AT5G60840_ID4	AT5G60840.1	WT_24h	WT_3h
AT5G61190	putative endonuclease or glycosyl hydrolase with C2H2-type zinc finger domain-containing protein;(source:Araport11)	NA	A3	AT5G61190_s3	AT5G61190_JC9	WT_24h	WT_3h
AT5G61190	putative endonuclease or glycosyl hydrolase with C2H2-type zinc finger domain-containing protein;(source:Araport11)	NA	A3	AT5G61190_P11	AT5G61190_JS11	WT_24h	WT_3h
AT5G61190	putative endonuclease or glycosyl hydrolase with C2H2-type zinc finger domain-containing protein;(source:Araport11)	NA	A3	AT5G61190_s3	AT5G61190_JS11	WT_24h	WT_3h
AT5G61190	putative endonuclease or glycosyl hydrolase with C2H2-type zinc finger domain-containing protein;(source:Araport11)	NA	IR	AT5G61190_s3	AT5G61190_JS11	WT_24h	WT_3h
AT5G61190	putative endonuclease or glycosyl hydrolase with C2H2-type zinc finger domain-containing protein;(source:Araport11)	NA	IR	AT5G61190_c1	AT5G61190_JS11	WT_24h	WT_3h
AT5G61380	Pseudo response regulator involved in the generation of circadian rhythms. TOC1 appears to shorten the period of circumnutation speed. TOC1 contributes to the plant fitness (carbon fixation, biomass) by influencing the circadian clock period. PRR3 may increase the stability of TOC1 by preventing interactions between TOC1 and the F-box protein ZTL. Expression of TOC1 is correlated with rhythmic ch…	APRR1,AtTOC1,PRR1,TOC1	IR	AT5G61380_JC2	AT5G61380_ID2	WT_24h	WT_3h
AT5G61380	Pseudo response regulator involved in the generation of circadian rhythms. TOC1 appears to shorten the period of circumnutation speed. TOC1 contributes to the plant fitness (carbon fixation, biomass) by influencing the circadian clock period. PRR3 may increase the stability of TOC1 by preventing interactions between TOC1 and the F-box protein ZTL. Expression of TOC1 is correlated with rhythmic ch…	APRR1,AtTOC1,PRR1,TOC1	IR	AT5G61380_JC2	AT5G61380_JC4	WT_24h	WT_3h
AT5G61560	Plant U-box type E3 ubiquitin ligase (PUB).	NA	IR	AT5G61560_P5	AT5G61560_P1	WT_24h	WT_3h
AT5G61560	Plant U-box type E3 ubiquitin ligase (PUB).	NA	A3	AT5G61560_P5	AT5G61560_s1	WT_24h	WT_3h
AT5G61560	Plant U-box type E3 ubiquitin ligase (PUB).	NA	IR	AT5G61560_P5	AT5G61560_s1	WT_24h	WT_3h
AT5G63000	Mitochondrial import inner membrane translocase subunit Tim17/Tim22/Tim23 family protein;(source:Araport11)	NA	A5	AT5G63000_ID1	AT5G63000_P1	WT_24h	WT_3h
AT5G63020	Nucleotide binding leucine rich repeat protein of the C-NB-LRR (CNL) type. Involved in TOPP4 mediated immune response.	NA	IR	AT5G63020_P1	AT5G63020_c1	WT_24h	WT_3h
AT5G63370	CDKG1 interacts with the splicing factor RSZ33 to regulate proper splicing of Cals5 Pre-mRNA.	CDKG1	IR	AT5G63370_P1	AT5G63370_P5	WT_24h	WT_3h
AT5G64150	RNA methyltransferase family protein;(source:Araport11)	NA	IR	AT5G64150_s1	AT5G64150_P1	WT_24h	WT_3h
AT5G64200	encodes an SC35-like splicing factor of 35 kD localized to the nuclear specks.	At-SC35,ATSC35,SC35	IR	AT5G64200.1	AT5G64200.2	WT_24h	WT_3h
AT5G64220	CAMTA2 proteins bind to the AtALMT1 promoter at in vitro. The gene itself is Al inducible, and AtALMT1 expression is partially repressed in camta2 mutant. The mRNA is cell-to-cell mobile.	CAMTA2	IR	AT5G64220_P2	AT5G64220_ID4	WT_24h	WT_3h
AT5G64250	Aldolase-type TIM barrel family protein;(source:Araport11)	NA	IR	AT5G64250.1	AT5G64250_P2	WT_24h	WT_3h
AT5G64350	Encodes FK506-binding protein 12 (FKBP12 or FKP12). FKP12 overexpression dramatically enhances rapamycin sensitivity, whereas rapamycin inhibition is relieved in transgenic plants deficient in FKP12.	ATFKBP12,FKBP12,FKP12	IR	AT5G64350_c1	AT5G64350_P1	WT_24h	WT_3h
AT5G64460	Phosphoglycerate mutase family protein;(source:Araport11)	NA	A5	AT5G64460_P2	AT5G64460_P3	WT_24h	WT_3h
AT5G64460	Phosphoglycerate mutase family protein;(source:Araport11)	NA	IR	AT5G64460_ID65	AT5G64460_P3	WT_24h	WT_3h
AT5G65060	MADS domain protein - flowering regulator that is closely related to FLC	AGL70,FCL3,MAF3	A3	AT5G65060_ID6	AT5G65060_P3	WT_24h	WT_3h
AT5G65290	LMBR1-like membrane protein;(source:Araport11)	NA	A5	AT5G65290_JS1	AT5G65290_P1	WT_24h	WT_3h
AT5G65310	Encodes a class I HDZip (homeodomain-leucine zipper) protein that is a positive regulator of ABA-responsiveness, mediating the inhibitory effect of ABA on growth during seedling establishment.	ATHB-5,ATHB5,HB5	A3	AT5G65310_P1	AT5G65310_c1	WT_24h	WT_3h
AT5G65420	Encodes a D-type cyclin CYCD4;1 that physically interacts with CDC2A and is expressed during vascular tissue development, embryogenesis, and formation of lateral root primordia. Its expression is upregulated early during germination.Involved in stomatal cell lineage proliferation in the hypocotyl.	CYCD41	A5	AT5G65420_P4	AT5G65420_P2	WT_24h	WT_3h
AT5G65420	Encodes a D-type cyclin CYCD4;1 that physically interacts with CDC2A and is expressed during vascular tissue development, embryogenesis, and formation of lateral root primordia. Its expression is upregulated early during germination.Involved in stomatal cell lineage proliferation in the hypocotyl.	CYCD41	ES	AT5G65420_P4	AT5G65420_P2	WT_24h	WT_3h
AT5G65420	Encodes a D-type cyclin CYCD4;1 that physically interacts with CDC2A and is expressed during vascular tissue development, embryogenesis, and formation of lateral root primordia. Its expression is upregulated early during germination.Involved in stomatal cell lineage proliferation in the hypocotyl.	CYCD41	IR	AT5G65420_P4	AT5G65420_P2	WT_24h	WT_3h
AT5G65685	SS5 is a chloroplast-localized protein that is related to the canonical starch synthases (most closely to SS4), but is catalytically inactive. Arabidopsis ss5 mutants have near-normal total transitory starch contents, but produce fewer and larger starch granules in their chloroplast. SS5 can bind to starch in vitro, and interacts with MRC/PII1 in vivo.	NA	A5	AT5G65685_ID9	AT5G65685_ID26	WT_24h	WT_3h
AT5G65685	SS5 is a chloroplast-localized protein that is related to the canonical starch synthases (most closely to SS4), but is catalytically inactive. Arabidopsis ss5 mutants have near-normal total transitory starch contents, but produce fewer and larger starch granules in their chloroplast. SS5 can bind to starch in vitro, and interacts with MRC/PII1 in vivo.	NA	IR	AT5G65685_ID9	AT5G65685_ID26	WT_24h	WT_3h
AT5G65685	SS5 is a chloroplast-localized protein that is related to the canonical starch synthases (most closely to SS4), but is catalytically inactive. Arabidopsis ss5 mutants have near-normal total transitory starch contents, but produce fewer and larger starch granules in their chloroplast. SS5 can bind to starch in vitro, and interacts with MRC/PII1 in vivo.	NA	A5	AT5G65685_ID24	AT5G65685_ID2	WT_24h	WT_3h
AT5G65685	SS5 is a chloroplast-localized protein that is related to the canonical starch synthases (most closely to SS4), but is catalytically inactive. Arabidopsis ss5 mutants have near-normal total transitory starch contents, but produce fewer and larger starch granules in their chloroplast. SS5 can bind to starch in vitro, and interacts with MRC/PII1 in vivo.	NA	IR	AT5G65685_ID24	AT5G65685_ID2	WT_24h	WT_3h
AT5G65685	SS5 is a chloroplast-localized protein that is related to the canonical starch synthases (most closely to SS4), but is catalytically inactive. Arabidopsis ss5 mutants have near-normal total transitory starch contents, but produce fewer and larger starch granules in their chloroplast. SS5 can bind to starch in vitro, and interacts with MRC/PII1 in vivo.	NA	IR	AT5G65685_ID9	AT5G65685_ID2	WT_24h	WT_3h
AT5G66055	A locus involved in embryogenesis. Mutations in this locus result in embryo lethality.	AKRP,EMB16,EMB2036	IR	AT5G66055_ID3	AT5G66055_P1	WT_24h	WT_3h
AT5G66055	A locus involved in embryogenesis. Mutations in this locus result in embryo lethality.	AKRP,EMB16,EMB2036	IR	AT5G66055_P2	AT5G66055_P1	WT_24h	WT_3h
AT5G66070	E3 ubiquitin ligase that functions in negative regulation of ABA signaling.	AtARRE	IR	AT5G66070_ID2	AT5G66070_P1	WT_24h	WT_3h
AT5G66190	Encodes a leaf-type ferredoxin:NADP(H) oxidoreductase. It is present in both chloroplast stroma and thylakoid membranes but is more abundant in the thylakoid. The affinity of this enzyme for ferredoxin is slightly, but significantly, higher than AtLFNR2, an isoform of the same enzyme. AtLFNR1 forms a heterodimer with AtFNR2 and is also a prerequisite to attach AtFNR2 to the thylakoid membrane.	ATLFNR1,FNR1,LFNR1	A5	AT5G66190.1	AT5G66190_ID15	WT_24h	WT_3h
AT5G66240	Encodes a WD40-repeat protein that interacts with the E3 Cullin Ring Ligase subunit DDB1a and is involved in secondary wall modification and thickening by regulating the degradation of specific proteins. RNAi-mediated silencing results in anther indehiscence and infertility.	ULCS1	IR	AT5G66240_P2	AT5G66240_P1	WT_24h	WT_3h
AT5G66250	kinectin-like protein;(source:Araport11)	NA	A3	AT5G66250_ID2	AT5G66250_P2	WT_24h	WT_3h
AT5G66250	kinectin-like protein;(source:Araport11)	NA	IR	AT5G66250_ID2	AT5G66250_P2	WT_24h	WT_3h
AT5G66250	kinectin-like protein;(source:Araport11)	NA	IR	AT5G66250_ID1	AT5G66250_P2	WT_24h	WT_3h
AT5G67340	Plant U-box type E3 ubiquitin ligase (PUB).	PUB2	A3	AT5G67340_P2	AT5G67340_JS2	WT_24h	WT_3h
AT5G67340	Plant U-box type E3 ubiquitin ligase (PUB).	PUB2	IR	AT5G67340_P2	AT5G67340_JS2	WT_24h	WT_3h

## Sheet: WT_0h_vs_WT_24h
GeneID	Description	Aliases	Mechanism	Isoform1	Isoform2	Time1	Time2
AT1G01690	Encodes a novel plant-specific protein that is involved in meiotic double strand break formation.	ATPRD3,PRD3	A3	AT1G01690_P2	AT1G01690.1	WT_24h	WT_0h
AT1G01920	SET domain-containing protein;(source:Araport11)	NA	IR	AT1G01920_P2	AT1G01920_ID219	WT_24h	WT_0h
AT1G02080	Acts as scaffold protein in the CCR4-NOT complex, by interacting with various NOT proteins and CAF1. Essential protein for proper pollen development and germination capacity.	NA	A3	AT1G02080_P2	AT1G02080.1	WT_24h	WT_0h
AT1G02080	Acts as scaffold protein in the CCR4-NOT complex, by interacting with various NOT proteins and CAF1. Essential protein for proper pollen development and germination capacity.	NA	IR	AT1G02080_P2	AT1G02080.1	WT_24h	WT_0h
AT1G02840	SR34/SR1 is a plant homologue of the human general/alternative splicing factor SF2/ASF. Barta et al (2010) have proposed a nomenclature for Serine/Arginine-Rich Protein Splicing Factors (SR proteins): Plant Cell. 2010, 22:2926.	At-SR34,ATSRP34,SR1,SR34,SRP34	A3	AT1G02840_P1	AT1G02840_CR3	WT_24h	WT_0h
AT1G02840	SR34/SR1 is a plant homologue of the human general/alternative splicing factor SF2/ASF. Barta et al (2010) have proposed a nomenclature for Serine/Arginine-Rich Protein Splicing Factors (SR proteins): Plant Cell. 2010, 22:2926.	At-SR34,ATSRP34,SR1,SR34,SRP34	ES	AT1G02840_P1	AT1G02840_CR3	WT_24h	WT_0h
AT1G02840	SR34/SR1 is a plant homologue of the human general/alternative splicing factor SF2/ASF. Barta et al (2010) have proposed a nomenclature for Serine/Arginine-Rich Protein Splicing Factors (SR proteins): Plant Cell. 2010, 22:2926.	At-SR34,ATSRP34,SR1,SR34,SRP34	IR	AT1G02840_P1	AT1G02840_CR3	WT_24h	WT_0h
AT1G02840	SR34/SR1 is a plant homologue of the human general/alternative splicing factor SF2/ASF. Barta et al (2010) have proposed a nomenclature for Serine/Arginine-Rich Protein Splicing Factors (SR proteins): Plant Cell. 2010, 22:2926.	At-SR34,ATSRP34,SR1,SR34,SRP34	IR	AT1G02840_s1	AT1G02840_CR3	WT_24h	WT_0h
AT1G02910	Mutants defective in this gene were shown to have a reduced PSII content (overall reduction in the levels of several PSII subunits) and a disrupted grana stack structure. The N-terminal half of the protein contains two tetratricopeptide repeat (TPR) motifs that are arranged tandemly, each consisting of a 34-residue degenerate consensus sequence. The N-terminal sequence is rich in positive and hyd…	LPA1	A3	AT1G02910_JS5	AT1G02910_P1	WT_24h	WT_0h
AT1G03090	MCCA is the biotinylated subunit of the dimer MCCase, which is involved in leucine degradation. Both subunits are nuclear coded and the active enzyme is located in the mitochondrion.	MCCA	IR	AT1G03090_P2	AT1G03090_s1	WT_24h	WT_0h
AT1G03190	UV damage and heat induce a common stress response in plants that leads to tissue death and reduced chloroplast function. The UVH6 product is suggested to be a negative regulator of this response.	ATXPD,UVH6	IR	AT1G03190_P1	AT1G03190.2	WT_24h	WT_0h
AT1G03190	UV damage and heat induce a common stress response in plants that leads to tissue death and reduced chloroplast function. The UVH6 product is suggested to be a negative regulator of this response.	ATXPD,UVH6	A3	AT1G03190_P1	AT1G03190_s1	WT_24h	WT_0h
AT1G03250	R3H domain protein involved in ribosome biogenesis.	NA	A3	AT1G03250_s1	AT1G03250_P1	WT_24h	WT_0h
AT1G03290	ELKS/Rab6-interacting/CAST family protein;(source:Araport11)	NA	IR	AT1G03290_P3	AT1G03290.2	WT_24h	WT_0h
AT1G05030	Major facilitator superfamily protein;(source:Araport11)	NA	A3	AT1G05030_P1	AT1G05030_s2	WT_24h	WT_0h
AT1G05030	Major facilitator superfamily protein;(source:Araport11)	NA	A5	AT1G05030_P1	AT1G05030_s2	WT_24h	WT_0h
AT1G05090	dentin sialophosphoprotein-like protein;(source:Araport11)	NA	IR	AT1G05090_ID2	AT1G05090.1	WT_24h	WT_0h
AT1G05750	Encodes a pentatricopeptide repeat protein required for editing of rpoA and clpP chloroplast transcripts.	CLB19,PDE247	IR	AT1G05750_P2	AT1G05750.1	WT_24h	WT_0h
AT1G05840	Eukaryotic aspartyl protease family protein;(source:Araport11)	NA	IR	AT1G05840_P1	AT1G05840_ID6	WT_24h	WT_0h
AT1G05940	Encodes a member of the cationic amino acid transporter (CAT) subfamily of amino acid polyamine choline transporters.	CAT9	IR	AT1G05940_P2	AT1G05940_P1	WT_24h	WT_0h
AT1G05950	hypothetical protein;(source:Araport11)	NA	A5	AT1G05950_JS2	AT1G05950_P2	WT_24h	WT_0h
AT1G05950	hypothetical protein;(source:Araport11)	NA	IR	AT1G05950_JS2	AT1G05950_P2	WT_24h	WT_0h
AT1G05950	hypothetical protein;(source:Araport11)	NA	IR	AT1G05950_P1	AT1G05950_P2	WT_24h	WT_0h
AT1G05950	hypothetical protein;(source:Araport11)	NA	IR	AT1G05950_P3	AT1G05950_P2	WT_24h	WT_0h
AT1G06190	Encodes a novel ribonucleic acid-binding protein that interacts with the endonuclease RNase E and supports its function in processing plastid ribonucleic acids.	RHON1	IR	AT1G06190_P1	AT1G06190.2	WT_24h	WT_0h
AT1G06220	Encodes a protein with similarity to splicing factor Snu114. Snu114 is thought to be involved in activation of the splicosome. Loss of GFA1 function results in reduced female fertility. Approximately 50% of ovules abort due to defects in the female gametophyte. In mutant gametophytes antipodal cells express egg cell markers suggesting a defect in specification of cell fate.GFA1 is also required t…	CLO,GFA1,MEE5	ES	AT1G06220_P1	AT1G06220_P2	WT_24h	WT_0h
AT1G06270	Pentatricopeptide repeat (PPR) superfamily protein;(source:Araport11)	NA	IR	AT1G06270_P1	AT1G06270_c1	WT_24h	WT_0h
AT1G06410	Encodes an enzyme putatively involved in trehalose biosynthesis. Though the protein has both trehalose-6-phosphate synthase (TPS)-like and trehalose-6-phosphate phosphatase (TPP)-like domains, neither activity has been detected in enzymatic assays nor has the protein been able to complement yeast TPS or TPP mutants.	ATTPS7,ATTPSA,TPS7,TPS7	A5	AT1G06410_P2	AT1G06410_P3	WT_24h	WT_0h
AT1G06410	Encodes an enzyme putatively involved in trehalose biosynthesis. Though the protein has both trehalose-6-phosphate synthase (TPS)-like and trehalose-6-phosphate phosphatase (TPP)-like domains, neither activity has been detected in enzymatic assays nor has the protein been able to complement yeast TPS or TPP mutants.	ATTPS7,ATTPSA,TPS7,TPS7	IR	AT1G06410_P2	AT1G06410_P3	WT_24h	WT_0h
AT1G06670	nuclear DEIH-box helicase (NIH) encoding a putative RNA and/or DNA helicase homologous to a group of nucleic acid helicases from the DEAD/H family with nuclear DEIH-box helicase (NIH) distinct N- and C-terminal regions that differ from animal DEIH proteins The mRNA is cell-to-cell mobile.	NIH	IR	AT1G06670.1	AT1G06670_P2	WT_24h	WT_0h
AT1G07010	Calcineurin-like metallo-phosphoesterase superfamily protein;(source:Araport11)	AtSLP1,SLP1	A3	AT1G07010_ID1	AT1G07010_P1	WT_24h	WT_0h
AT1G07440	NAD(P)-binding Rossmann-fold superfamily protein;(source:Araport11)	NA	IR	AT1G07440_P1	AT1G07440_ID2	WT_24h	WT_0h
AT1G07720	Encodes KCS3, a member of the 3-ketoacyl-CoA synthase family involved in the biosynthesis of VLCFA (very long chain fatty acids).	KCS3	IR	AT1G07720_P2	AT1G07720_JC2	WT_24h	WT_0h
AT1G07780	Encodes phosphoribosylanthranilate isomerase which catalyzes the third step of the tryptophan biosynthetic pathway. Member of gene family. The mRNA is cell-to-cell mobile.	PAI1,TRP6	IR	AT1G07780_P1	AT1G07780_P12	WT_24h	WT_0h
AT1G07780	Encodes phosphoribosylanthranilate isomerase which catalyzes the third step of the tryptophan biosynthetic pathway. Member of gene family. The mRNA is cell-to-cell mobile.	PAI1,TRP6	ES	AT1G07780_P1	AT1G07780_P2	WT_24h	WT_0h
AT1G08110	Encodes a Zn2+ dependent glyoxylase.	AtGLYI2,GLXI	ES	AT1G08110_P3	AT1G08110_P4	WT_24h	WT_0h
AT1G08110	Encodes a Zn2+ dependent glyoxylase.	AtGLYI2,GLXI	IR	AT1G08110_P3	AT1G08110_P4	WT_24h	WT_0h
AT1G08470	Although this enzyme is predicted to encode a strictosidine synthase (SS), it lacks a conserved catalytic glutamate residue found in active SS enzymes and it is not expected to have SS activity.	SSL3	IR	AT1G08470_JS1	AT1G08470_P1	WT_24h	WT_0h
AT1G08550	Violaxanthin deepoxidase involved in xanthophyll cycle.Two major consequences of the npq1 mutation are the absence of zeaxanthin formation in strong light and the partial inhibition of the quenching of singlet excited chlorophylls in the photosystem II light-harvesting complex	AVDE1,NPQ1	A3	AT1G08550_ID11	AT1G08550.1	WT_24h	WT_0h
AT1G08600	The Arabidopsis ATRX harbours a N-terminal ADD domain and a C-terminal helicase domain and is devoid of the large central region involved in DAXX interaction in mammals. Arabidopsis ATRX mutant alleles are viable, but with reduced fertility. Their combination with mutants for the H3.3 chaperone HIRA impairs plant survival. ATRX loss affects cellular histone H3.3 pools and modulates the H3.1/H3.3 …	ATRX,CHR20	A5	AT1G08600.2	AT1G08600.1	WT_24h	WT_0h
AT1G08630	Encodes a threonine aldolase, involved in threonine degradation to glycine. Primarily expressed in seeds and seedlings.	THA1	A5	AT1G08630_JC3	AT1G08630_P1	WT_24h	WT_0h
AT1G08630	Encodes a threonine aldolase, involved in threonine degradation to glycine. Primarily expressed in seeds and seedlings.	THA1	A3	AT1G08630_JC3	AT1G08630_P7	WT_24h	WT_0h
AT1G08630	Encodes a threonine aldolase, involved in threonine degradation to glycine. Primarily expressed in seeds and seedlings.	THA1	A5	AT1G08630_JC3	AT1G08630_P7	WT_24h	WT_0h
AT1G08845	Member of the uL18 RNA-binding protein family. uL18 proteins share a short structurally conserved domain that binds the 5S rRNA and allow its incorporation into ribosomes.	HES	IR	AT1G08845.2	AT1G08845_ID3	WT_24h	WT_0h
AT1G08900	Major facilitator superfamily protein;(source:Araport11)	NA	IR	AT1G08900_P4	AT1G08900.1	WT_24h	WT_0h
AT1G09140	Encodes a serine-arginine rich RNA binding protein involved in regulation of splicing (including splicing of itself). Exists as 3 alternative spliced forms that are differentially expressed. AT1G09140.1 predominantly accumulates in the cytosol in light grown plants.Barta et al (2010) have proposed a nomenclature for Serine/Arginine-Rich Protein Splicing Factors (SR proteins): Plant Cell. 2010, 22…	At-SR30,ATSRP30,SR30	A3	AT1G09140_P2	AT1G09140_P1	WT_24h	WT_0h
AT1G09140	Encodes a serine-arginine rich RNA binding protein involved in regulation of splicing (including splicing of itself). Exists as 3 alternative spliced forms that are differentially expressed. AT1G09140.1 predominantly accumulates in the cytosol in light grown plants.Barta et al (2010) have proposed a nomenclature for Serine/Arginine-Rich Protein Splicing Factors (SR proteins): Plant Cell. 2010, 22…	At-SR30,ATSRP30,SR30	IR	AT1G09140_P2	AT1G09140_P3	WT_24h	WT_0h
AT1G09195	Ppx-GppA phosphatase;(source:Araport11)	NA	A5	AT1G09195_P8	AT1G09195_P11	WT_24h	WT_0h
AT1G09195	Ppx-GppA phosphatase;(source:Araport11)	NA	IR	AT1G09195_JS11	AT1G09195_P11	WT_24h	WT_0h
AT1G09195	Ppx-GppA phosphatase;(source:Araport11)	NA	IR	AT1G09195_P8	AT1G09195_P11	WT_24h	WT_0h
AT1G09195	Ppx-GppA phosphatase;(source:Araport11)	NA	A3	AT1G09195_P8	AT1G09195_P13	WT_24h	WT_0h
AT1G09195	Ppx-GppA phosphatase;(source:Araport11)	NA	A3	AT1G09195_JS11	AT1G09195_P13	WT_24h	WT_0h
AT1G09195	Ppx-GppA phosphatase;(source:Araport11)	NA	A5	AT1G09195_JS11	AT1G09195_P13	WT_24h	WT_0h
AT1G09195	Ppx-GppA phosphatase;(source:Araport11)	NA	IR	AT1G09195_JS11	AT1G09195_P13	WT_24h	WT_0h
AT1G09195	Ppx-GppA phosphatase;(source:Araport11)	NA	IR	AT1G09195_P8	AT1G09195_P13	WT_24h	WT_0h
AT1G09195	Ppx-GppA phosphatase;(source:Araport11)	NA	A3	AT1G09195_JS11	AT1G09195_P6	WT_24h	WT_0h
AT1G09195	Ppx-GppA phosphatase;(source:Araport11)	NA	A3	AT1G09195_P8	AT1G09195_P6	WT_24h	WT_0h
AT1G09195	Ppx-GppA phosphatase;(source:Araport11)	NA	A5	AT1G09195_JS11	AT1G09195_P6	WT_24h	WT_0h
AT1G09195	Ppx-GppA phosphatase;(source:Araport11)	NA	IR	AT1G09195_JS11	AT1G09195_P6	WT_24h	WT_0h
AT1G09195	Ppx-GppA phosphatase;(source:Araport11)	NA	A3	AT1G09195_P8	AT1G09195_P7	WT_24h	WT_0h
AT1G09195	Ppx-GppA phosphatase;(source:Araport11)	NA	A3	AT1G09195_JS11	AT1G09195_P7	WT_24h	WT_0h
AT1G09195	Ppx-GppA phosphatase;(source:Araport11)	NA	A5	AT1G09195_JS11	AT1G09195_P7	WT_24h	WT_0h
AT1G09195	Ppx-GppA phosphatase;(source:Araport11)	NA	IR	AT1G09195_JS11	AT1G09195_P7	WT_24h	WT_0h
AT1G09210	Encodes one of three Arabidopsis calreticulins.Post-transcriptionally regulates together with CRT1 VAMP721/722 levels under ER stress.	AtCRT1b,CRT1b,CRT2	ES	AT1G09210_P1	AT1G09210_ID16	WT_24h	WT_0h
AT1G09530	Transcription factor interacting with photoreceptors phyA and phyB. Forms a ternary complex in vitro with G-box element of the promoters of LHY, CCA1. Acts as a negative regulator of phyB signalling. It degrades rapidly after irradiation of dark grown seedlings in a process controlled by phytochromes. Does not play a significant role in controlling light input and function of the circadian clockw…	PAP3,PIF3	A5	AT1G09530_P1	AT1G09530_JS7	WT_24h	WT_0h
AT1G09530	Transcription factor interacting with photoreceptors phyA and phyB. Forms a ternary complex in vitro with G-box element of the promoters of LHY, CCA1. Acts as a negative regulator of phyB signalling. It degrades rapidly after irradiation of dark grown seedlings in a process controlled by phytochromes. Does not play a significant role in controlling light input and function of the circadian clockw…	PAP3,PIF3	IR	AT1G09530_P4	AT1G09530_JS7	WT_24h	WT_0h
AT1G09530	Transcription factor interacting with photoreceptors phyA and phyB. Forms a ternary complex in vitro with G-box element of the promoters of LHY, CCA1. Acts as a negative regulator of phyB signalling. It degrades rapidly after irradiation of dark grown seedlings in a process controlled by phytochromes. Does not play a significant role in controlling light input and function of the circadian clockw…	PAP3,PIF3	IR	AT1G09530_P1	AT1G09530_JS7	WT_24h	WT_0h
AT1G09710	Paralog of DRMY1 with unknown function.	DP1	A5	AT1G09710_JS2	AT1G09710_P3	WT_24h	WT_0h
AT1G09710	Paralog of DRMY1 with unknown function.	DP1	IR	AT1G09710_JS2	AT1G09710_P3	WT_24h	WT_0h
AT1G09910	Rhamnogalacturonate lyase family protein;(source:Araport11)	NA	IR	AT1G09910.1	AT1G09910_P2	WT_24h	WT_0h
AT1G10070	Encodes a chloroplast branched-chain amino acid aminotransferase. Complements the yeast leu/iso-leu/val auxotrophy mutant. Involved in cell wall development.	ATBCAT-2,BCAT-2,BCAT2	IR	AT1G10070.3	AT1G10070.2	WT_24h	WT_0h
AT1G10320	Zinc finger C-x8-C-x5-C-x3-H type family protein;(source:Araport11)	NA	A5	AT1G10320_ID1	AT1G10320_c2	WT_24h	WT_0h
AT1G10320	Zinc finger C-x8-C-x5-C-x3-H type family protein;(source:Araport11)	NA	IR	AT1G10320_ID1	AT1G10320_c2	WT_24h	WT_0h
AT1G10320	Zinc finger C-x8-C-x5-C-x3-H type family protein;(source:Araport11)	NA	A3	AT1G10320_ID1	AT1G10320_c4	WT_24h	WT_0h
AT1G10430	Encodes one of the isoforms of the catalytic subunit of protein phosphatase 2A: AT1G59830/PP2A-1, AT1G10430/PP2A-2, At2g42500/PP2A-3, At3g58500/PP2A-4 [Plant Molecular Biology (1993) 21:475-485 and (1994) 26:523-528; Note that in more recent publications, there is mixed use of gene names for PP2A-3 and PP2A-4 - some refer to At2g42500 as PP2A-3 and some as PP2A-4]. It regulates the activation of …	PP2A-2	IR	AT1G10430_P1	AT1G10430_P2	WT_24h	WT_0h
AT1G10522	Encodes PRIN2 (plastid redox insensitive 2). PRIN2 mutants are impaired in PEP (plastid-encoded RNA polymerase) activity and high light-dependent plastid redox signalling to the nucleus.	PRIN2	A3	AT1G10522_P1	AT1G10522.2	WT_24h	WT_0h
AT1G10522	Encodes PRIN2 (plastid redox insensitive 2). PRIN2 mutants are impaired in PEP (plastid-encoded RNA polymerase) activity and high light-dependent plastid redox signalling to the nucleus.	PRIN2	A5	AT1G10522_P1	AT1G10522.2	WT_24h	WT_0h
AT1G10865	cytochrome C oxidase assembly factor;(source:Araport11)	NA	A3	AT1G10865_P1	AT1G10865.2	WT_24h	WT_0h
AT1G10910	Member of the P subfamily of PRR proteins. Loss of function results in defects in abnormal plastid RNA edit and chloroplast biogenesis	EMB3103,PDM2	A3	AT1G10910_JS2	AT1G10910_P1	WT_24h	WT_0h
AT1G10910	Member of the P subfamily of PRR proteins. Loss of function results in defects in abnormal plastid RNA edit and chloroplast biogenesis	EMB3103,PDM2	A3	AT1G10910_ID6	AT1G10910_P1	WT_24h	WT_0h
AT1G10910	Member of the P subfamily of PRR proteins. Loss of function results in defects in abnormal plastid RNA edit and chloroplast biogenesis	EMB3103,PDM2	IR	AT1G10910_JS2	AT1G10910_P1	WT_24h	WT_0h
AT1G10910	Member of the P subfamily of PRR proteins. Loss of function results in defects in abnormal plastid RNA edit and chloroplast biogenesis	EMB3103,PDM2	IR	AT1G10910_ID6	AT1G10910_P1	WT_24h	WT_0h
AT1G11090	alpha/beta-Hydrolases superfamily protein;(source:Araport11)	MAGL1	IR	AT1G11090.1	AT1G11090_ID2	WT_24h	WT_0h
AT1G11130	Encodes an atypical receptor-like kinase protein with a predicted extracellular domain of six leucine-rich repeats and an intracellular serine-threonine kinase domain expressed throughout the developing root but whose kinase activity is not essential for its function in vivo. Regulates expression of GLABRA2, CAPRICE, WEREWOLF, and ENHANCER OF GLABRA3. Required for floral organ shape, the developm…	SCM,SRF9,SUB	IR	AT1G11130_P2	AT1G11130_P1	WT_24h	WT_0h
AT1G11360	Adenine nucleotide alpha hydrolases-like superfamily protein;(source:Araport11)	NA	A5	AT1G11360_P4	AT1G11360_ID1	WT_24h	WT_0h
AT1G11360	Adenine nucleotide alpha hydrolases-like superfamily protein;(source:Araport11)	NA	IR	AT1G11360_P4	AT1G11360_ID1	WT_24h	WT_0h
AT1G11450	nodulin MtN21-like transporter family protein	UMAMIT27	A5	AT1G11450_c3	AT1G11450_P4	WT_24h	WT_0h
AT1G11450	nodulin MtN21-like transporter family protein	UMAMIT27	IR	AT1G11450_c3	AT1G11450_P4	WT_24h	WT_0h
AT1G11650	Encodes an RNA binding protein with three RNA recognition motifs. The mRNA is cell-to-cell mobile.	ATRBP45B,RBP45B	ES	AT1G11650_c1	AT1G11650_P2	WT_24h	WT_0h
AT1G11850	transmembrane protein;(source:Araport11)	NA	A3	AT1G11850_P2	AT1G11850.3	WT_24h	WT_0h
AT1G11850	transmembrane protein;(source:Araport11)	NA	A5	AT1G11850_P2	AT1G11850.3	WT_24h	WT_0h
AT1G11850	transmembrane protein;(source:Araport11)	NA	IR	AT1G11850_P2	AT1G11850.3	WT_24h	WT_0h
AT1G11850	transmembrane protein;(source:Araport11)	NA	A5	AT1G11850_P2	AT1G11850_c1	WT_24h	WT_0h
AT1G11850	transmembrane protein;(source:Araport11)	NA	IR	AT1G11850_P2	AT1G11850_c1	WT_24h	WT_0h
AT1G11950	Transcription factor jumonji (jmjC) domain-containing protein;(source:Araport11)	NA	IR	AT1G11950_P1	AT1G11950_c1	WT_24h	WT_0h
AT1G12250	Pentapeptide repeat-containing protein;(source:Araport11)	TL20.3	A3	AT1G12250.2	AT1G12250_P1	WT_24h	WT_0h
AT1G12760	Zinc finger, C3HC4 type (RING finger) family protein;(source:Araport11)	NA	IR	AT1G12760_P1	AT1G12760.2	WT_24h	WT_0h
AT1G13060	Encodes 20S proteasome beta subunit PBE1 (PBE1).	PBE1	A5	AT1G13060_P1	AT1G13060_ID64	WT_24h	WT_0h
AT1G13060	Encodes 20S proteasome beta subunit PBE1 (PBE1).	PBE1	MES	AT1G13060_P1	AT1G13060_ID64	WT_24h	WT_0h
AT1G13450	Encodes GT-1, a plant transcription factor that binds to one of the cis-acting elements, BoxII, which resides within the upstream promoter region of light-responsive genes. GT-1 was assumed to act as a molecular switch modulated through Ca(2+)-dependent phosphorylation/dephosphorylation in response to light signals.	GT-1	A5	AT1G13450_ID3	AT1G13450_ID2	WT_24h	WT_0h
AT1G13450	Encodes GT-1, a plant transcription factor that binds to one of the cis-acting elements, BoxII, which resides within the upstream promoter region of light-responsive genes. GT-1 was assumed to act as a molecular switch modulated through Ca(2+)-dependent phosphorylation/dephosphorylation in response to light signals.	GT-1	A5	AT1G13450_ID3	AT1G13450_JC10	WT_24h	WT_0h
AT1G13450	Encodes GT-1, a plant transcription factor that binds to one of the cis-acting elements, BoxII, which resides within the upstream promoter region of light-responsive genes. GT-1 was assumed to act as a molecular switch modulated through Ca(2+)-dependent phosphorylation/dephosphorylation in response to light signals.	GT-1	IR	AT1G13450_ID3	AT1G13450_JC10	WT_24h	WT_0h
AT1G13820	alpha/beta-Hydrolases superfamily protein;(source:Araport11)	NA	ES	AT1G13820_ID2	AT1G13820_P1	WT_24h	WT_0h
AT1G13860	Encodes QUASIMODO2 LIKE1 (QUL1), a paralog of QUASIMODO2 (QUA2). AT1G78240 (QUA2), AT1G13860 (QUL1) and AT2G03480 (QUL2) form a clade with a possible role in plant vasculature development.	QUL1	A5	AT1G13860.4	AT1G13860.2	WT_24h	WT_0h
AT1G14660	member of putative Na+/H+ antiporter (AtNHX) family. Functions as a plasma membrane Li+/H+ antiporter. Involved in Li+ efflux and detoxification.	ATNHX8,NHX8,NHX8	IR	AT1G14660_c2	AT1G14660_c1	WT_24h	WT_0h
AT1G14685	Encodes a member of the BASIC PENTACYSTEINE (BPC) proteins. BPC proteins are plant-specific transcription factors present throughout land plants. BPC transcription factor family is integral for a wide range of processes that support normal growth and development.Along with BPC1, BPC2 binds to the promoter of and represses GALS1 thereby reducing beta 1,4- galactan accumulation.	ATBPC2,BBR/BPC2,BPC2	A5	AT1G14685_s2	AT1G14685_s1	WT_24h	WT_0h
AT1G14685	Encodes a member of the BASIC PENTACYSTEINE (BPC) proteins. BPC proteins are plant-specific transcription factors present throughout land plants. BPC transcription factor family is integral for a wide range of processes that support normal growth and development.Along with BPC1, BPC2 binds to the promoter of and represses GALS1 thereby reducing beta 1,4- galactan accumulation.	ATBPC2,BBR/BPC2,BPC2	IR	AT1G14685_s2	AT1G14685_s1	WT_24h	WT_0h
AT1G14970	O-fucosyltransferase family protein;(source:Araport11)	NA	A3	AT1G14970_JC10	AT1G14970_P1	WT_24h	WT_0h
AT1G14970	O-fucosyltransferase family protein;(source:Araport11)	NA	A5	AT1G14970_P2	AT1G14970_P1	WT_24h	WT_0h
AT1G14970	O-fucosyltransferase family protein;(source:Araport11)	NA	A5	AT1G14970_ID6	AT1G14970_P1	WT_24h	WT_0h
AT1G14970	O-fucosyltransferase family protein;(source:Araport11)	NA	A5	AT1G14970_JC10	AT1G14970_P1	WT_24h	WT_0h
AT1G14970	O-fucosyltransferase family protein;(source:Araport11)	NA	IR	AT1G14970_P2	AT1G14970_P1	WT_24h	WT_0h
AT1G14970	O-fucosyltransferase family protein;(source:Araport11)	NA	IR	AT1G14970_ID6	AT1G14970_P1	WT_24h	WT_0h
AT1G15030	Encodes a Cysteine-rich peptide (CRP) family protein	NA	IR	AT1G15030_P1	AT1G15030_ID4	WT_24h	WT_0h
AT1G15215	Encodes SHH1, a homeodomain protein required for DNA methylation. It is an atypical RNA-directed DNA methylation component, and functions in transcriptional silencing through both DNA methylation-dependent and -independent pathways.	DTF1,SHH1	A3	AT1G15215_ID1	AT1G15215_JC5	WT_24h	WT_0h
AT1G15215	Encodes SHH1, a homeodomain protein required for DNA methylation. It is an atypical RNA-directed DNA methylation component, and functions in transcriptional silencing through both DNA methylation-dependent and -independent pathways.	DTF1,SHH1	IR	AT1G15215_ID1	AT1G15215_JC5	WT_24h	WT_0h
AT1G15500	TLC ATP/ADP transporter;(source:Araport11)	ATNTT2	IR	AT1G15500_JS1	AT1G15500_P1	WT_24h	WT_0h
AT1G15690	Encodes a H(+)-translocating (pyrophosphate-energized) inorganic pyrophosphatase (H(+)-PPase; EC 3.6.1.1) located in the vacuolar membrane. Expression is found in all tissues examined, including meristems and floral organ primordium. Expression is particularly enhanced in pollen, and is repressed by light. Over expression and loss of function phenotypes suggest AVP1 is involved in regulation of a…	AtAVP1,ATAVP3,AtVHP1,AVP-3,AVP1,FUGU5,VHP1	A3	AT1G15690_ID11	AT1G15690.2	WT_24h	WT_0h
AT1G15690	Encodes a H(+)-translocating (pyrophosphate-energized) inorganic pyrophosphatase (H(+)-PPase; EC 3.6.1.1) located in the vacuolar membrane. Expression is found in all tissues examined, including meristems and floral organ primordium. Expression is particularly enhanced in pollen, and is repressed by light. Over expression and loss of function phenotypes suggest AVP1 is involved in regulation of a…	AtAVP1,ATAVP3,AtVHP1,AVP-3,AVP1,FUGU5,VHP1	A5	AT1G15690_ID11	AT1G15690.2	WT_24h	WT_0h
AT1G15690	Encodes a H(+)-translocating (pyrophosphate-energized) inorganic pyrophosphatase (H(+)-PPase; EC 3.6.1.1) located in the vacuolar membrane. Expression is found in all tissues examined, including meristems and floral organ primordium. Expression is particularly enhanced in pollen, and is repressed by light. Over expression and loss of function phenotypes suggest AVP1 is involved in regulation of a…	AtAVP1,ATAVP3,AtVHP1,AVP-3,AVP1,FUGU5,VHP1	ES	AT1G15690_ID11	AT1G15690.2	WT_24h	WT_0h
AT1G15790	mediator of RNA polymerase II transcription subunit 15a-like protein;(source:Araport11)	NA	A3	AT1G15790_P4	AT1G15790_P1	WT_24h	WT_0h
AT1G15790	mediator of RNA polymerase II transcription subunit 15a-like protein;(source:Araport11)	NA	A3	AT1G15790_c2	AT1G15790_P1	WT_24h	WT_0h
AT1G15790	mediator of RNA polymerase II transcription subunit 15a-like protein;(source:Araport11)	NA	A3	AT1G15790_ID6	AT1G15790_P1	WT_24h	WT_0h
AT1G15790	mediator of RNA polymerase II transcription subunit 15a-like protein;(source:Araport11)	NA	A3	AT1G15790_P2	AT1G15790_P1	WT_24h	WT_0h
AT1G15790	mediator of RNA polymerase II transcription subunit 15a-like protein;(source:Araport11)	NA	A3	AT1G15790_JS2	AT1G15790_P1	WT_24h	WT_0h
AT1G15790	mediator of RNA polymerase II transcription subunit 15a-like protein;(source:Araport11)	NA	IR	AT1G15790_P4	AT1G15790_P1	WT_24h	WT_0h
AT1G15790	mediator of RNA polymerase II transcription subunit 15a-like protein;(source:Araport11)	NA	IR	AT1G15790_JS2	AT1G15790_P1	WT_24h	WT_0h
AT1G15790	mediator of RNA polymerase II transcription subunit 15a-like protein;(source:Araport11)	NA	IR	AT1G15790_ID6	AT1G15790_P1	WT_24h	WT_0h
AT1G15930	Ribosomal protein L7Ae/L30e/S12e/Gadd45 family protein;(source:Araport11)	NA	ES	AT1G15930_P2	AT1G15930_c1	WT_24h	WT_0h
AT1G16710	Encodes an enzyme with histone acetyltransferase activity that can use both H3 and H4 histones as substrates. No single prior lysine acetylation is sufficient to block HAC12 acetylation of the H3 or H4 peptides, suggesting that HAC12 can acetylate any of several lysines present in the peptides.	HAC12	IR	AT1G16710_P9	AT1G16710_P3	WT_24h	WT_0h
AT1G16930	F-box/RNI-like/FBD-like domains-containing protein;(source:Araport11)	NA	A3	AT1G16930_JS3	AT1G16930_JS1	WT_24h	WT_0h
AT1G17530	Encodes a translocase of inner mitochondrial membrane.	ATTIM23-1,TIM23-1	IR	AT1G17530_P1	AT1G17530_P2	WT_24h	WT_0h
AT1G17940	Endosomal targeting BRO1-like domain-containing protein;(source:Araport11)	NA	A5	AT1G17940_s5	AT1G17940_P1	WT_24h	WT_0h
AT1G17940	Endosomal targeting BRO1-like domain-containing protein;(source:Araport11)	NA	A3	AT1G17940_s5	AT1G17940_P4	WT_24h	WT_0h
AT1G17940	Endosomal targeting BRO1-like domain-containing protein;(source:Araport11)	NA	A5	AT1G17940_s5	AT1G17940_P4	WT_24h	WT_0h
AT1G18150	Encodes mitogen-activated protein kinase 8 (MPK8). MPK8 connects protein phosphorylation, Ca2+, and ROS in the wound-signaling pathway.	ATMPK8,MPK8	A3	AT1G18150.3	AT1G18150_P1	WT_24h	WT_0h
AT1G18190	This gene is predicted to encode a protein that functions as a Golgi apparatus structural component known as a golgin in mammals and yeast. A fluorescently-tagged version of GC2 co-localizes with Golgi markers, and this localization appears to be replicated using the C-terminal (508?668 aa) portion of the protein.	GC2	IR	AT1G18190_P1	AT1G18190_ID7	WT_24h	WT_0h
AT1G18660	Membrane localized protein of unknown function. Involved in negative regulation of immune response. Mutants have increased resistance to pathogens.	IAP1	IR	AT1G18660_P2	AT1G18660_P3	WT_24h	WT_0h
AT1G18700	DNAJ heat shock N-terminal domain-containing protein;(source:Araport11)	NA	IR	AT1G18700_P1	AT1G18700_P2	WT_24h	WT_0h
AT1G18950	DDT domain superfamily;(source:Araport11)	NA	A3	AT1G18950_P1	AT1G18950_P3	WT_24h	WT_0h
AT1G19000	Homeodomain-like superfamily protein;(source:Araport11)	NA	A3	AT1G19000_P2	AT1G19000_ID16	WT_24h	WT_0h
AT1G19000	Homeodomain-like superfamily protein;(source:Araport11)	NA	A5	AT1G19000_P2	AT1G19000_ID16	WT_24h	WT_0h
AT1G19080	This gene is predicted to encode a PSF3 component of the GINS complex. This complex has been implicated in the initiation of DNA replication in Xenopus. Mutations in this gene cause defects in embryo development.	PSF3,TTN10	A5	AT1G19080_ID4	AT1G19080_JS8	WT_24h	WT_0h
AT1G19080	This gene is predicted to encode a PSF3 component of the GINS complex. This complex has been implicated in the initiation of DNA replication in Xenopus. Mutations in this gene cause defects in embryo development.	PSF3,TTN10	ES	AT1G19080_ID4	AT1G19080_JS8	WT_24h	WT_0h
AT1G19080	This gene is predicted to encode a PSF3 component of the GINS complex. This complex has been implicated in the initiation of DNA replication in Xenopus. Mutations in this gene cause defects in embryo development.	PSF3,TTN10	ES	AT1G19080_JS6	AT1G19080_JS8	WT_24h	WT_0h
AT1G19080	This gene is predicted to encode a PSF3 component of the GINS complex. This complex has been implicated in the initiation of DNA replication in Xenopus. Mutations in this gene cause defects in embryo development.	PSF3,TTN10	IR	AT1G19080_JS6	AT1G19080_JS8	WT_24h	WT_0h
AT1G19080	This gene is predicted to encode a PSF3 component of the GINS complex. This complex has been implicated in the initiation of DNA replication in Xenopus. Mutations in this gene cause defects in embryo development.	PSF3,TTN10	IR	AT1G19080_ID4	AT1G19080_JS8	WT_24h	WT_0h
AT1G19100	Encodes a member of the conserved Microrchidia (MORC) adenosine triphosphatase (ATPase) family, predicted to catalyze alterations in chromosome superstructure. Required for heterochromatin condensation and gene silencing.	AtMORC6,DMS11,MORC6	A3	AT1G19100_P1	AT1G19100_JS3	WT_24h	WT_0h
AT1G19100	Encodes a member of the conserved Microrchidia (MORC) adenosine triphosphatase (ATPase) family, predicted to catalyze alterations in chromosome superstructure. Required for heterochromatin condensation and gene silencing.	AtMORC6,DMS11,MORC6	A5	AT1G19100_P1	AT1G19100_JS3	WT_24h	WT_0h
AT1G19270	Encodes a ubiquitin-activated peptidase that is a member of a small (7 member) ubiquitin binding protein family. It appears to play a role in regulation of endoreduplication in leaf epidermal tissue. Together with CUC2/CUC3-UBP15 part of a regulatory module which controls the initiation of axillary meristems, thereby determining plant architecture.	DA1	A3	AT1G19270_ID5	AT1G19270_P1	WT_24h	WT_0h
AT1G19270	Encodes a ubiquitin-activated peptidase that is a member of a small (7 member) ubiquitin binding protein family. It appears to play a role in regulation of endoreduplication in leaf epidermal tissue. Together with CUC2/CUC3-UBP15 part of a regulatory module which controls the initiation of axillary meristems, thereby determining plant architecture.	DA1	IR	AT1G19270_ID5	AT1G19270_P1	WT_24h	WT_0h
AT1G19290	Pentatricopeptide repeat (PPR) superfamily protein;(source:Araport11)	TANG2	IR	AT1G19290_P1	AT1G19290_P2	WT_24h	WT_0h
AT1G19350	Encodes brassinosteroid (BR) signalling protein that accumulates in the nucleus as dephosphorylated form in response to BRs. Is phosphorylated by the BIN2 GSK3 kinase. It synergistically interacts with BIM1 to bind to E box sequences (CANNTG). The protein contains a nuclear localization signal (NLS), followed by a highly conserved amino-terminal domain (N) shared by all family members, a BIN2 pho…	BES1,BZR2	A5	AT1G19350_ID4	AT1G19350_ID2	WT_24h	WT_0h
AT1G19350	Encodes brassinosteroid (BR) signalling protein that accumulates in the nucleus as dephosphorylated form in response to BRs. Is phosphorylated by the BIN2 GSK3 kinase. It synergistically interacts with BIM1 to bind to E box sequences (CANNTG). The protein contains a nuclear localization signal (NLS), followed by a highly conserved amino-terminal domain (N) shared by all family members, a BIN2 pho…	BES1,BZR2	IR	AT1G19350_ID4	AT1G19350_ID2	WT_24h	WT_0h
AT1G19400	Tail-anchored (TA) OEP membrane protein which possesses a single C-terminal transmembrane domain targeting post-translationally to plastids.	E-4PDHase	A5	AT1G19400_P2	AT1G19400_P1	WT_24h	WT_0h
AT1G19400	Tail-anchored (TA) OEP membrane protein which possesses a single C-terminal transmembrane domain targeting post-translationally to plastids.	E-4PDHase	IR	AT1G19400_P2	AT1G19400_P1	WT_24h	WT_0h
AT1G19720	Pentatricopeptide repeat (PPR-like) superfamily protein;(source:Araport11)	NA	IR	AT1G19720.1	AT1G19720_ID1	WT_24h	WT_0h
AT1G20020	Encodes a leaf-type ferredoxin:NADP(H) oxidoreductase. It is present in both chloroplast stroma and thylakoid membranes but is more abundant in the stroma The mRNA is cell-to-cell mobile.	ATLFNR2,FNR2,LFNR2	IR	AT1G20020_P2	AT1G20020_P1	WT_24h	WT_0h
AT1G20270	2-oxoglutarate-dependent dioxygenase	NA	A3	AT1G20270_P1	AT1G20270_JS4	WT_24h	WT_0h
AT1G20580	Small nuclear ribonucleoprotein family protein;(source:Araport11)	NA	A3	AT1G20580_P1	AT1G20580_ID1	WT_24h	WT_0h
AT1G20810	FKBP-like peptidyl-prolyl cis-trans isomerase family protein;(source:Araport11)	NA	A5	AT1G20810_s1	AT1G20810.1	WT_24h	WT_0h
AT1G20830	Encodes MCD1 (MULTIPLE CHLOROPLAST DIVISION SITE 1). Determines the site of chloroplast division in concert with MinD (AT5G24020).	MCD1	A3	AT1G20830_c1	AT1G20830_ID4	WT_24h	WT_0h
AT1G20830	Encodes MCD1 (MULTIPLE CHLOROPLAST DIVISION SITE 1). Determines the site of chloroplast division in concert with MinD (AT5G24020).	MCD1	A5	AT1G20830_c1	AT1G20830_ID4	WT_24h	WT_0h
AT1G21350	Thioredoxin superfamily protein;(source:Araport11)	NA	A3	AT1G21350_P1	AT1G21350_P5	WT_24h	WT_0h
AT1G21350	Thioredoxin superfamily protein;(source:Araport11)	NA	IR	AT1G21350_P1	AT1G21350_P5	WT_24h	WT_0h
AT1G21500	hypothetical protein;(source:Araport11)	NA	IR	AT1G21500_ID1	AT1G21500_P1	WT_24h	WT_0h
AT1G21780	BTB/POZ domain-containing protein. Contains similarity to gb:AJ000644 SPOP (speckle-type POZ protein) from Homo sapiens and contains a PF:00651 BTB/POZ domain. ESTs gb:T75841, gb:R89974, gb:R30221, gb:N96386, gb:T76457, gb:AI100013 and gb:T76456 come from this gene;supported by full-length. Interacts with CUL3A and CUL3B.	NA	IR	AT1G21780.1	AT1G21780.2	WT_24h	WT_0h
AT1G22200	Endoplasmic reticulum vesicle transporter protein;(source:Araport11)	NA	A3	AT1G22200_P1	AT1G22200_ID21	WT_24h	WT_0h
AT1G22200	Endoplasmic reticulum vesicle transporter protein;(source:Araport11)	NA	A5	AT1G22200_P1	AT1G22200_ID21	WT_24h	WT_0h
AT1G22250	hypothetical protein;(source:Araport11)	NA	IR	AT1G22250_ID2	AT1G22250.1	WT_24h	WT_0h
AT1G22300	Encodes a 14-3-3 protein. This protein is reported to interact with the BZR1 transcription factor involved in brassinosteroid signaling and may affect the nucleocytoplasmic shuttling of BZR1. Might act as a stabilization factor to mediate the oligomerization of REM on the plasma membrane.	14-3-3EPSILON,GF14_EPSILON,GRF10	IR	AT1G22300.3	AT1G22300_P1	WT_24h	WT_0h
AT1G22450	subunit 6b of cytochrome c oxidase	ATCOX6B2,COX6B	IR	AT1G22450.1	AT1G22450_ID1	WT_24h	WT_0h
AT1G23960	hypothetical protein (DUF626);(source:Araport11)	NA	IR	AT1G23960_ID2	AT1G23960_P1	WT_24h	WT_0h
AT1G24460	Encodes a novel protein that co-immunoprecipitates with SYP41. It is involved in vacuolar trafficking and salt tolerance, potentially via a role in vesicle fusion and in maintaining TGN structure or identity. Mutants display delayed formation of the Brefeldin A (BFA) compartment in cotyledons upon application of BFA.	TNO1	A5	AT1G24460_c1	AT1G24460_P2	WT_24h	WT_0h
AT1G26110	Encodes Decapping 5, required for mRNA decapping, P-body formation and translational repression during postembryonic development.	DCP5	A3	AT1G26110_P1	AT1G26110_ID1	WT_24h	WT_0h
AT1G26110	Encodes Decapping 5, required for mRNA decapping, P-body formation and translational repression during postembryonic development.	DCP5	A5	AT1G26110_P1	AT1G26110_ID1	WT_24h	WT_0h
AT1G26110	Encodes Decapping 5, required for mRNA decapping, P-body formation and translational repression during postembryonic development.	DCP5	ES	AT1G26110_P1	AT1G26110_ID1	WT_24h	WT_0h
AT1G27070	Encodes a chloroplast-localized CBM48-containing protein that is involved in starch granule initiation. PTST2 delivers suitable oligosaccharide substrates to starch synthase 4 (SS4). Mutants lacking PTST2 have fewer starch granules in leaf chloroplasts than the wild type. PTST2 is the Arabidopsis ortholog of the rice FLO6 protein.	PTST2	IR	AT1G27070_P1	AT1G27070_ID1	WT_24h	WT_0h
AT1G27210	ARM repeat superfamily protein;(source:Araport11)	NA	A3	AT1G27210_P1	AT1G27210_c1	WT_24h	WT_0h
AT1G27210	ARM repeat superfamily protein;(source:Araport11)	NA	A5	AT1G27210_P1	AT1G27210_c1	WT_24h	WT_0h
AT1G27300	transmembrane protein;(source:Araport11)	NA	IR	AT1G27300.1	AT1G27300_ID1	WT_24h	WT_0h
AT1G27370	In conjunction with SPL11 and SPL2, SPL10 redundantly controls proper development of lateral organs in association with shoot maturation in the reproductive phase. SPL2, SPL10, and SPL11, suppress root regeneration with age by inhibiting wound-induced auxin biosynthesis. SPL10 also controls lamina shape during vegetative development.	SPL10	A3	AT1G27370_P1	AT1G27370_P2	WT_24h	WT_0h
AT1G27370	In conjunction with SPL11 and SPL2, SPL10 redundantly controls proper development of lateral organs in association with shoot maturation in the reproductive phase. SPL2, SPL10, and SPL11, suppress root regeneration with age by inhibiting wound-induced auxin biosynthesis. SPL10 also controls lamina shape during vegetative development.	SPL10	A5	AT1G27370_P1	AT1G27370_P2	WT_24h	WT_0h
AT1G27370	In conjunction with SPL11 and SPL2, SPL10 redundantly controls proper development of lateral organs in association with shoot maturation in the reproductive phase. SPL2, SPL10, and SPL11, suppress root regeneration with age by inhibiting wound-induced auxin biosynthesis. SPL10 also controls lamina shape during vegetative development.	SPL10	IR	AT1G27370_P1	AT1G27370_P2	WT_24h	WT_0h
AT1G27970	Encodes an ortholog of yeast NTF2, a nuclear envelop transport protein that functions as the nuclear import receptor for RanGDP, an essential player in nucleocytoplasmic transport. The mRNA is cell-to-cell mobile.	NTF2B	IR	AT1G27970_P1	AT1G27970.2	WT_24h	WT_0h
AT1G28290	Encodes an atypical arabinogalactan protein that is localized to the plasma membrange. AGP31 is highly expressed in flowers and vascular tissue and is repressed by jasmonic acid. AGP31 may play a role in vascular tissue function during defense and development.	AGP31	IR	AT1G28290_P1	AT1G28290_P2	WT_24h	WT_0h
AT1G28330	dormancy-associated protein (DRM1)	AtDRM1,DRM1,DYL1	ES	AT1G28330.1	AT1G28330_ID1	WT_24h	WT_0h
AT1G28530	Encodes a protein that localizes to both chloroplasts and amyloplasts and is required for both chloroplast and mesophyll development.	ANU10	A3	AT1G28530.1	AT1G28530_ID2	WT_24h	WT_0h
AT1G28530	Encodes a protein that localizes to both chloroplasts and amyloplasts and is required for both chloroplast and mesophyll development.	ANU10	A3	AT1G28530_c2	AT1G28530_ID2	WT_24h	WT_0h
AT1G28530	Encodes a protein that localizes to both chloroplasts and amyloplasts and is required for both chloroplast and mesophyll development.	ANU10	IR	AT1G28530_c2	AT1G28530_ID2	WT_24h	WT_0h
AT1G28620	pseudogene of GDSL-like Lipase/Acylhydrolase superfamily protein;(source:Araport11)	NA	ES	AT1G28620_JC15	AT1G28620.1	WT_24h	WT_0h
AT1G28620	pseudogene of GDSL-like Lipase/Acylhydrolase superfamily protein;(source:Araport11)	NA	IR	AT1G28620_JC13	AT1G28620.1	WT_24h	WT_0h
AT1G28620	pseudogene of GDSL-like Lipase/Acylhydrolase superfamily protein;(source:Araport11)	NA	IR	AT1G28620_JC15	AT1G28620.1	WT_24h	WT_0h
AT1G29120	Hydrolase-like protein family;(source:Araport11)	UP9	A3	AT1G29120_s3	AT1G29120_JC5	WT_24h	WT_0h
AT1G29120	Hydrolase-like protein family;(source:Araport11)	UP9	IR	AT1G29120_s3	AT1G29120_JC5	WT_24h	WT_0h
AT1G29750	Receptor-like serine/threonine kinase (RKF1). The putative extracellular domain of the RKF1 protein contains 13 tandem repeats of leucine-rich sequences. Expressed in early flower primordial, stamen, and pollen grains.	RKF1	A3	AT1G29750_P1	AT1G29750_JC12	WT_24h	WT_0h
AT1G29750	Receptor-like serine/threonine kinase (RKF1). The putative extracellular domain of the RKF1 protein contains 13 tandem repeats of leucine-rich sequences. Expressed in early flower primordial, stamen, and pollen grains.	RKF1	A3	AT1G29750_P2	AT1G29750_JC12	WT_24h	WT_0h
AT1G29750	Receptor-like serine/threonine kinase (RKF1). The putative extracellular domain of the RKF1 protein contains 13 tandem repeats of leucine-rich sequences. Expressed in early flower primordial, stamen, and pollen grains.	RKF1	IR	AT1G29750_P1	AT1G29750_JC12	WT_24h	WT_0h
AT1G29820	Magnesium transporter CorA-like family protein;(source:Araport11)	NA	ES	AT1G29820_s1	AT1G29820_JS1	WT_24h	WT_0h
AT1G29820	Magnesium transporter CorA-like family protein;(source:Araport11)	NA	ES	AT1G29820.1	AT1G29820_JS1	WT_24h	WT_0h
AT1G29820	Magnesium transporter CorA-like family protein;(source:Araport11)	NA	ES	AT1G29820_ID8	AT1G29820_JS1	WT_24h	WT_0h
AT1G29820	Magnesium transporter CorA-like family protein;(source:Araport11)	NA	IR	AT1G29820_s1	AT1G29820_JS1	WT_24h	WT_0h
AT1G29820	Magnesium transporter CorA-like family protein;(source:Araport11)	NA	MES	AT1G29820_ID8	AT1G29820_JS1	WT_24h	WT_0h
AT1G29960	Peptidase S24/S26A/S26B/S26C family protein;(source:Araport11)	NA	A3	AT1G29960_P1	AT1G29960_c1	WT_24h	WT_0h
AT1G29960	Peptidase S24/S26A/S26B/S26C family protein;(source:Araport11)	NA	A5	AT1G29960_P1	AT1G29960_c1	WT_24h	WT_0h
AT1G29960	Peptidase S24/S26A/S26B/S26C family protein;(source:Araport11)	NA	A5	AT1G29960_P2	AT1G29960_c1	WT_24h	WT_0h
AT1G30520	Encodes a chloroplast O-succinylbenzoyl-CoA ligase. Involved in phylloquinone biosynthesis. Knock mutant is seedling lethal.	AAE14	A3	AT1G30520_P1	AT1G30520_JS5	WT_24h	WT_0h
AT1G30520	Encodes a chloroplast O-succinylbenzoyl-CoA ligase. Involved in phylloquinone biosynthesis. Knock mutant is seedling lethal.	AAE14	A3	AT1G30520_P1	AT1G30520_s2	WT_24h	WT_0h
AT1G30520	Encodes a chloroplast O-succinylbenzoyl-CoA ligase. Involved in phylloquinone biosynthesis. Knock mutant is seedling lethal.	AAE14	IR	AT1G30520_P1	AT1G30520_s2	WT_24h	WT_0h
AT1G30640	Ubiquitously expressed protein kinase.	NA	A3	AT1G30640_JS4	AT1G30640_JS13	WT_24h	WT_0h
AT1G30640	Ubiquitously expressed protein kinase.	NA	A5	AT1G30640_JS4	AT1G30640_JS13	WT_24h	WT_0h
AT1G30640	Ubiquitously expressed protein kinase.	NA	A5	AT1G30640_JS4	AT1G30640_s4	WT_24h	WT_0h
AT1G30970	Encodes SUF4 (SUPPRESSOR of FRI 4), a putative zinc-finger-containing transcription factor that is required for delayed flowering in winter-annual Arabidopsis. suf4 mutations strongly suppress the late-flowering phenotype of FRI (FRIGIDA) mutants. suf4 mutants also show reduced H3K4 trimethylation at FLC (FLOWERING LOCUS C), a floral inhibitor. SUF4 may act to specifically recruit a putative hist…	SUF4	IR	AT1G30970_s2	AT1G30970_P1	WT_24h	WT_0h
AT1G31010	organellar single-stranded DNA binding protein 4;(source:Araport11)	OSB4	IR	AT1G31010_ID2	AT1G31010_P1	WT_24h	WT_0h
AT1G31440	SH3 domain-containing protein;(source:Araport11)	SH3P1	A3	AT1G31440_P1	AT1G31440_c1	WT_24h	WT_0h
AT1G31440	SH3 domain-containing protein;(source:Araport11)	SH3P1	A5	AT1G31440_P1	AT1G31440_c1	WT_24h	WT_0h
AT1G31500	HESP identified based on similarity to nocturnins and presence circadian regulatory elements in the promoter. It functions as a Mg(II) dependent poly(A) exoribonuclease.It is under circadian regulation and expressed at night. Knockdowns affect the regulation of circadian genes CCA1 and TOC1.	HESP	A3	AT1G31500_ID11	AT1G31500_P1	WT_24h	WT_0h
AT1G31500	HESP identified based on similarity to nocturnins and presence circadian regulatory elements in the promoter. It functions as a Mg(II) dependent poly(A) exoribonuclease.It is under circadian regulation and expressed at night. Knockdowns affect the regulation of circadian genes CCA1 and TOC1.	HESP	IR	AT1G31500_P7	AT1G31500_P1	WT_24h	WT_0h
AT1G31500	HESP identified based on similarity to nocturnins and presence circadian regulatory elements in the promoter. It functions as a Mg(II) dependent poly(A) exoribonuclease.It is under circadian regulation and expressed at night. Knockdowns affect the regulation of circadian genes CCA1 and TOC1.	HESP	IR	AT1G31500_P6	AT1G31500_P1	WT_24h	WT_0h
AT1G31500	HESP identified based on similarity to nocturnins and presence circadian regulatory elements in the promoter. It functions as a Mg(II) dependent poly(A) exoribonuclease.It is under circadian regulation and expressed at night. Knockdowns affect the regulation of circadian genes CCA1 and TOC1.	HESP	A3	AT1G31500_ID11	AT1G31500_P4	WT_24h	WT_0h
AT1G31500	HESP identified based on similarity to nocturnins and presence circadian regulatory elements in the promoter. It functions as a Mg(II) dependent poly(A) exoribonuclease.It is under circadian regulation and expressed at night. Knockdowns affect the regulation of circadian genes CCA1 and TOC1.	HESP	IR	AT1G31500_P6	AT1G31500_P4	WT_24h	WT_0h
AT1G31500	HESP identified based on similarity to nocturnins and presence circadian regulatory elements in the promoter. It functions as a Mg(II) dependent poly(A) exoribonuclease.It is under circadian regulation and expressed at night. Knockdowns affect the regulation of circadian genes CCA1 and TOC1.	HESP	IR	AT1G31500_ID11	AT1G31500_P4	WT_24h	WT_0h
AT1G31500	HESP identified based on similarity to nocturnins and presence circadian regulatory elements in the promoter. It functions as a Mg(II) dependent poly(A) exoribonuclease.It is under circadian regulation and expressed at night. Knockdowns affect the regulation of circadian genes CCA1 and TOC1.	HESP	A3	AT1G31500_ID11	AT1G31500_P5	WT_24h	WT_0h
AT1G31500	HESP identified based on similarity to nocturnins and presence circadian regulatory elements in the promoter. It functions as a Mg(II) dependent poly(A) exoribonuclease.It is under circadian regulation and expressed at night. Knockdowns affect the regulation of circadian genes CCA1 and TOC1.	HESP	A3	AT1G31500_P6	AT1G31500_P5	WT_24h	WT_0h
AT1G31500	HESP identified based on similarity to nocturnins and presence circadian regulatory elements in the promoter. It functions as a Mg(II) dependent poly(A) exoribonuclease.It is under circadian regulation and expressed at night. Knockdowns affect the regulation of circadian genes CCA1 and TOC1.	HESP	IR	AT1G31500_P6	AT1G31500_P5	WT_24h	WT_0h
AT1G31950	Sesterterpene synthase which produces various sesterpne backbones bia type-A cyclization mechanism.	NA	IR	AT1G31950_P2	AT1G31950_P3	WT_24h	WT_0h
AT1G32160	beta-casein (DUF760);(source:Araport11)	NA	IR	AT1G32160_ID2	AT1G32160_P1	WT_24h	WT_0h
AT1G32400	TOM2A encodes a 280 amino acid putative four-pass transmembrane protein with a C-terminal farnesylation signal, essential for efficient multiplication of tobacco mosaic viruses.	TOM2A	A3	AT1G32400_P1	AT1G32400_ID4	WT_24h	WT_0h
AT1G32460	hypothetical protein;(source:Araport11)	NA	IR	AT1G32460_ID2	AT1G32460.1	WT_24h	WT_0h
AT1G32460	hypothetical protein;(source:Araport11)	NA	A3	AT1G32460_ID2	AT1G32460_JS2	WT_24h	WT_0h
AT1G32460	hypothetical protein;(source:Araport11)	NA	IR	AT1G32460_ID2	AT1G32460_JS2	WT_24h	WT_0h
AT1G32540	Encodes a protein with 3 plant-specific zinc finger domains that acts as a positive regulator of cell death.	LOL1	A5	AT1G32540_JC8	AT1G32540_P1	WT_24h	WT_0h
AT1G32540	Encodes a protein with 3 plant-specific zinc finger domains that acts as a positive regulator of cell death.	LOL1	IR	AT1G32540_JC8	AT1G32540_P1	WT_24h	WT_0h
AT1G32540	Encodes a protein with 3 plant-specific zinc finger domains that acts as a positive regulator of cell death.	LOL1	A5	AT1G32540_JC8	AT1G32540_P2	WT_24h	WT_0h
AT1G32540	Encodes a protein with 3 plant-specific zinc finger domains that acts as a positive regulator of cell death.	LOL1	IR	AT1G32540_P3	AT1G32540_P2	WT_24h	WT_0h
AT1G32540	Encodes a protein with 3 plant-specific zinc finger domains that acts as a positive regulator of cell death.	LOL1	IR	AT1G32540_JC8	AT1G32540_P2	WT_24h	WT_0h
AT1G33060	NAC 014;(source:Araport11)	ANAC014,NAC014	A3	AT1G33060_P2	AT1G33060_P1	WT_24h	WT_0h
AT1G33110	MATE efflux family protein;(source:Araport11)	NA	IR	AT1G33110_P1	AT1G33110.2	WT_24h	WT_0h
AT1G34120	Encodes an inositol polyphosphate 5-phosphatase that appears to have Type I activity. It can dephosphorylate IP3(inositol(1,4,5)P3) and IP4 (inositol(1,3,4,5)P4), but it does not act on I(1)P, I(1,4)P2, or phosphatidylinositol(4,5)P2.	AT5P1,AT5PTASE1,ATIP5PI,IP5PI	A3	AT1G34120_ID1	AT1G34120_P1	WT_24h	WT_0h
AT1G34120	Encodes an inositol polyphosphate 5-phosphatase that appears to have Type I activity. It can dephosphorylate IP3(inositol(1,4,5)P3) and IP4 (inositol(1,3,4,5)P4), but it does not act on I(1)P, I(1,4)P2, or phosphatidylinositol(4,5)P2.	AT5P1,AT5PTASE1,ATIP5PI,IP5PI	A5	AT1G34120_ID1	AT1G34120_P1	WT_24h	WT_0h
AT1G34220	Regulator of Vps4 activity in the MVB pathway protein;(source:Araport11)	ISTL1	A3	AT1G34220.2	AT1G34220.1	WT_24h	WT_0h
AT1G34430	2-oxoacid dehydrogenases acyltransferase family protein;(source:Araport11)	EMB3003	A3	AT1G34430_c3	AT1G34430_ID99	WT_24h	WT_0h
AT1G34430	2-oxoacid dehydrogenases acyltransferase family protein;(source:Araport11)	EMB3003	A5	AT1G34430.1	AT1G34430_ID99	WT_24h	WT_0h
AT1G34430	2-oxoacid dehydrogenases acyltransferase family protein;(source:Araport11)	EMB3003	ES	AT1G34430_c3	AT1G34430_ID99	WT_24h	WT_0h
[truncated: 1,514 more rows]
