# Supplementary material
Source: HighWire-hosted journal article supplement (doi:10.1101/rna.080738.125)
Supplement: S2_Data.xlsx [file S2_Data.xlsx]

## Sheet: WT_0h_vs_gun1_0h
GeneID	Description	Aliases	Mechanism	Isoform1	Isoform2	Time1	Time2
AT1G01080	RNA-binding (RRM/RBD/RNP motifs) family protein;(source:Araport11)	NA	IR	AT1G01080_P1	AT1G01080_P3	gun1_0h	WT_0h
AT1G01260	bHLH13 interacts with JAZ proteins, and functions redundantly with bHLH3, bHLH14 and bHLH17 to negatively regulate jasmonate responses.	bHLH013,bHLH13,JAM2	A3	AT1G01260_ID2	AT1G01260_P1	gun1_0h	WT_0h
AT1G01260	bHLH13 interacts with JAZ proteins, and functions redundantly with bHLH3, bHLH14 and bHLH17 to negatively regulate jasmonate responses.	bHLH013,bHLH13,JAM2	IR	AT1G01260_ID2	AT1G01260_P1	gun1_0h	WT_0h
AT1G01690	Encodes a novel plant-specific protein that is involved in meiotic double strand break formation.	ATPRD3,PRD3	A3	AT1G01690_P2	AT1G01690_JC4	gun1_0h	WT_0h
AT1G02080	Acts as scaffold protein in the CCR4-NOT complex, by interacting with various NOT proteins and CAF1. Essential protein for proper pollen development and germination capacity.	NA	A3	AT1G02080_P2	AT1G02080.1	gun1_0h	WT_0h
AT1G02080	Acts as scaffold protein in the CCR4-NOT complex, by interacting with various NOT proteins and CAF1. Essential protein for proper pollen development and germination capacity.	NA	IR	AT1G02080_P2	AT1G02080.1	gun1_0h	WT_0h
AT1G02740	MRG1 and MRG2 proteins act as readers of H3K4me3/H3K36me3 marked chromatin. They interact with each other as well as several other protein classes, to modulate the activity of flowering genes.	MRG2	A3	AT1G02740_P1	AT1G02740_c2	gun1_0h	WT_0h
AT1G03250	R3H domain protein involved in ribosome biogenesis.	NA	A3	AT1G03250_s1	AT1G03250_P1	gun1_0h	WT_0h
AT1G04985	triacylglycerol lipase-like protein;(source:Araport11)	NA	IR	AT1G04985_P1	AT1G04985_P2	gun1_0h	WT_0h
AT1G05230	Encodes a homeobox-leucine zipper family protein belonging to the HD-ZIP IV family. Mutants have trichomes that appear glass-like under a dissecting microscope as compared to the wild-type trichomes. The mutations do not affect trichome growth or branch number.	HDG2	A5	AT1G05230.4	AT1G05230_JC3	gun1_0h	WT_0h
AT1G05230	Encodes a homeobox-leucine zipper family protein belonging to the HD-ZIP IV family. Mutants have trichomes that appear glass-like under a dissecting microscope as compared to the wild-type trichomes. The mutations do not affect trichome growth or branch number.	HDG2	A5	AT1G05230_ID4	AT1G05230_JC3	gun1_0h	WT_0h
AT1G05230	Encodes a homeobox-leucine zipper family protein belonging to the HD-ZIP IV family. Mutants have trichomes that appear glass-like under a dissecting microscope as compared to the wild-type trichomes. The mutations do not affect trichome growth or branch number.	HDG2	A5	AT1G05230_ID6	AT1G05230_JC3	gun1_0h	WT_0h
AT1G05230	Encodes a homeobox-leucine zipper family protein belonging to the HD-ZIP IV family. Mutants have trichomes that appear glass-like under a dissecting microscope as compared to the wild-type trichomes. The mutations do not affect trichome growth or branch number.	HDG2	ES	AT1G05230.4	AT1G05230_JC3	gun1_0h	WT_0h
AT1G05230	Encodes a homeobox-leucine zipper family protein belonging to the HD-ZIP IV family. Mutants have trichomes that appear glass-like under a dissecting microscope as compared to the wild-type trichomes. The mutations do not affect trichome growth or branch number.	HDG2	IR	AT1G05230.4	AT1G05230_JC3	gun1_0h	WT_0h
AT1G05230	Encodes a homeobox-leucine zipper family protein belonging to the HD-ZIP IV family. Mutants have trichomes that appear glass-like under a dissecting microscope as compared to the wild-type trichomes. The mutations do not affect trichome growth or branch number.	HDG2	IR	AT1G05230_ID6	AT1G05230_JC3	gun1_0h	WT_0h
AT1G05950	hypothetical protein;(source:Araport11)	NA	A5	AT1G05950_JS2	AT1G05950_P4	gun1_0h	WT_0h
AT1G05950	hypothetical protein;(source:Araport11)	NA	IR	AT1G05950_P1	AT1G05950_P4	gun1_0h	WT_0h
AT1G05950	hypothetical protein;(source:Araport11)	NA	IR	AT1G05950_JS2	AT1G05950_P4	gun1_0h	WT_0h
AT1G06050	ENHANCED DISEASE RESISTANCE-like protein (DUF1336);(source:Araport11)	NA	A3	AT1G06050_c1	AT1G06050_JC3	gun1_0h	WT_0h
AT1G06050	ENHANCED DISEASE RESISTANCE-like protein (DUF1336);(source:Araport11)	NA	A5	AT1G06050_c1	AT1G06050_JC3	gun1_0h	WT_0h
AT1G06190	Encodes a novel ribonucleic acid-binding protein that interacts with the endonuclease RNase E and supports its function in processing plastid ribonucleic acids.	RHON1	IR	AT1G06190_P1	AT1G06190.2	gun1_0h	WT_0h
AT1G06270	Pentatricopeptide repeat (PPR) superfamily protein;(source:Araport11)	NA	IR	AT1G06270_P1	AT1G06270_c1	gun1_0h	WT_0h
AT1G06410	Encodes an enzyme putatively involved in trehalose biosynthesis. Though the protein has both trehalose-6-phosphate synthase (TPS)-like and trehalose-6-phosphate phosphatase (TPP)-like domains, neither activity has been detected in enzymatic assays nor has the protein been able to complement yeast TPS or TPP mutants.	ATTPS7,ATTPSA,TPS7,TPS7	IR	AT1G06410_P2	AT1G06410_P1	gun1_0h	WT_0h
AT1G06670	nuclear DEIH-box helicase (NIH) encoding a putative RNA and/or DNA helicase homologous to a group of nucleic acid helicases from the DEAD/H family with nuclear DEIH-box helicase (NIH) distinct N- and C-terminal regions that differ from animal DEIH proteins The mRNA is cell-to-cell mobile.	NIH	IR	AT1G06670.1	AT1G06670_P2	gun1_0h	WT_0h
AT1G07910	Encodes a tRNA ligase that resembles the yeast Trl1 RNA ligase in structure and function but very different in sequence. Like Trl1, AtRNL consists of two domains, an N-terminal ligase component and a C-terminal 5'-kinase/2',3'-cyclic phosphodiesterase (CPD) component that can function in tRNA splicing in vivo when expressed as separate polypeptides. Requires a 2'-PO4 end for tRNA splicing in vivo.	AtRLG1,ATRNL,RNL,ZYG3	A5	AT1G07910_P1	AT1G07910_P2	gun1_0h	WT_0h
AT1G08110	Encodes a Zn2+ dependent glyoxylase.	AtGLYI2,GLXI	ES	AT1G08110_P3	AT1G08110_P4	gun1_0h	WT_0h
AT1G08110	Encodes a Zn2+ dependent glyoxylase.	AtGLYI2,GLXI	IR	AT1G08110_P3	AT1G08110_P4	gun1_0h	WT_0h
AT1G08230	Codes for a H+-driven, high affinity gamma-aminobutyric acid (GABA) transporter. Localized at the plasma membrane. In planta, AtGAT1 expression was highest in flowers and under conditions of elevated GABA concentrations such as wounding or senescence.	NA	IR	AT1G08230_P2	AT1G08230_P5	gun1_0h	WT_0h
AT1G08310	alpha/beta-Hydrolases superfamily protein;(source:Araport11)	NA	A3	AT1G08310_ID3	AT1G08310.1	gun1_0h	WT_0h
AT1G08310	alpha/beta-Hydrolases superfamily protein;(source:Araport11)	NA	IR	AT1G08310_ID3	AT1G08310.1	gun1_0h	WT_0h
AT1G08310	alpha/beta-Hydrolases superfamily protein;(source:Araport11)	NA	IR	AT1G08310_ID3	AT1G08310.2	gun1_0h	WT_0h
AT1G08310	alpha/beta-Hydrolases superfamily protein;(source:Araport11)	NA	A3	AT1G08310_ID3	AT1G08310_ID1	gun1_0h	WT_0h
AT1G08310	alpha/beta-Hydrolases superfamily protein;(source:Araport11)	NA	IR	AT1G08310_ID3	AT1G08310_ID1	gun1_0h	WT_0h
AT1G08630	Encodes a threonine aldolase, involved in threonine degradation to glycine. Primarily expressed in seeds and seedlings.	THA1	A5	AT1G08630_JC3	AT1G08630.2	gun1_0h	WT_0h
AT1G08630	Encodes a threonine aldolase, involved in threonine degradation to glycine. Primarily expressed in seeds and seedlings.	THA1	A5	AT1G08630_JC3	AT1G08630_P1	gun1_0h	WT_0h
AT1G09195	Ppx-GppA phosphatase;(source:Araport11)	NA	A5	AT1G09195_JS11	AT1G09195.2	gun1_0h	WT_0h
AT1G09195	Ppx-GppA phosphatase;(source:Araport11)	NA	ES	AT1G09195_JS11	AT1G09195.2	gun1_0h	WT_0h
AT1G09195	Ppx-GppA phosphatase;(source:Araport11)	NA	IR	AT1G09195_JS11	AT1G09195.2	gun1_0h	WT_0h
AT1G09195	Ppx-GppA phosphatase;(source:Araport11)	NA	A3	AT1G09195_JS11	AT1G09195_P9	gun1_0h	WT_0h
AT1G09195	Ppx-GppA phosphatase;(source:Araport11)	NA	A5	AT1G09195_JS11	AT1G09195_P9	gun1_0h	WT_0h
AT1G09195	Ppx-GppA phosphatase;(source:Araport11)	NA	IR	AT1G09195_JS11	AT1G09195_P9	gun1_0h	WT_0h
AT1G09210	Encodes one of three Arabidopsis calreticulins.Post-transcriptionally regulates together with CRT1 VAMP721/722 levels under ER stress.	AtCRT1b,CRT1b,CRT2	ES	AT1G09210_P1	AT1G09210_ID16	gun1_0h	WT_0h
AT1G09910	Rhamnogalacturonate lyase family protein;(source:Araport11)	NA	IR	AT1G09910.1	AT1G09910_P2	gun1_0h	WT_0h
AT1G10390	DRA2 is a homolog of mammalian nucleoporin 98 and a likely component of the nuclear pore complex in Arabidopsis. It positively participates in the control of the hypocotyl elongation response to plant proximity and control of shade induced gene expression. Nucleoportin which redundantly inhibits flowering together with Nup98b through multiple pathways including clock, photoperiod, and age pathway…	DRA2	A3	AT1G10390_P2	AT1G10390_JS4	gun1_0h	WT_0h
AT1G10430	Encodes one of the isoforms of the catalytic subunit of protein phosphatase 2A: AT1G59830/PP2A-1, AT1G10430/PP2A-2, At2g42500/PP2A-3, At3g58500/PP2A-4 [Plant Molecular Biology (1993) 21:475-485 and (1994) 26:523-528; Note that in more recent publications, there is mixed use of gene names for PP2A-3 and PP2A-4 - some refer to At2g42500 as PP2A-3 and some as PP2A-4]. It regulates the activation of …	PP2A-2	IR	AT1G10430_P1	AT1G10430_P2	gun1_0h	WT_0h
AT1G11060	Encodes one of two redundant proteins (the other is WAPL2) that are involved in prophase removal of cohesion during meiosis. Double mutants with wapl2 exhibit reduced fertility due to defects in meiosis and also some abnormal embryo development in rare cases where embryos are formed.	AtWAPL1,WAPL1	A5	AT1G11060_P1	AT1G11060_ID15	gun1_0h	WT_0h
AT1G11060	Encodes one of two redundant proteins (the other is WAPL2) that are involved in prophase removal of cohesion during meiosis. Double mutants with wapl2 exhibit reduced fertility due to defects in meiosis and also some abnormal embryo development in rare cases where embryos are formed.	AtWAPL1,WAPL1	A5	AT1G11060_P1	AT1G11060_ID7	gun1_0h	WT_0h
AT1G11060	Encodes one of two redundant proteins (the other is WAPL2) that are involved in prophase removal of cohesion during meiosis. Double mutants with wapl2 exhibit reduced fertility due to defects in meiosis and also some abnormal embryo development in rare cases where embryos are formed.	AtWAPL1,WAPL1	IR	AT1G11060_P1	AT1G11060_ID7	gun1_0h	WT_0h
AT1G13860	Encodes QUASIMODO2 LIKE1 (QUL1), a paralog of QUASIMODO2 (QUA2). AT1G78240 (QUA2), AT1G13860 (QUL1) and AT2G03480 (QUL2) form a clade with a possible role in plant vasculature development.	QUL1	A5	AT1G13860_JS3	AT1G13860.1	gun1_0h	WT_0h
AT1G13860	Encodes QUASIMODO2 LIKE1 (QUL1), a paralog of QUASIMODO2 (QUA2). AT1G78240 (QUA2), AT1G13860 (QUL1) and AT2G03480 (QUL2) form a clade with a possible role in plant vasculature development.	QUL1	IR	AT1G13860_JS3	AT1G13860.1	gun1_0h	WT_0h
AT1G13860	Encodes QUASIMODO2 LIKE1 (QUL1), a paralog of QUASIMODO2 (QUA2). AT1G78240 (QUA2), AT1G13860 (QUL1) and AT2G03480 (QUL2) form a clade with a possible role in plant vasculature development.	QUL1	IR	AT1G13860_P3	AT1G13860.1	gun1_0h	WT_0h
AT1G13860	Encodes QUASIMODO2 LIKE1 (QUL1), a paralog of QUASIMODO2 (QUA2). AT1G78240 (QUA2), AT1G13860 (QUL1) and AT2G03480 (QUL2) form a clade with a possible role in plant vasculature development.	QUL1	A3	AT1G13860_JS3	AT1G13860_JS1	gun1_0h	WT_0h
AT1G13860	Encodes QUASIMODO2 LIKE1 (QUL1), a paralog of QUASIMODO2 (QUA2). AT1G78240 (QUA2), AT1G13860 (QUL1) and AT2G03480 (QUL2) form a clade with a possible role in plant vasculature development.	QUL1	A3	AT1G13860_P3	AT1G13860_JS1	gun1_0h	WT_0h
AT1G13860	Encodes QUASIMODO2 LIKE1 (QUL1), a paralog of QUASIMODO2 (QUA2). AT1G78240 (QUA2), AT1G13860 (QUL1) and AT2G03480 (QUL2) form a clade with a possible role in plant vasculature development.	QUL1	A5	AT1G13860_JS3	AT1G13860_JS1	gun1_0h	WT_0h
AT1G14150	Encodes a subunit of the NAD(P)H dehydrogenase complex located in the chloroplast thylakoid lumen.	PnsL2,PQL1,PQL2	A5	AT1G14150.1	AT1G14150_c1	gun1_0h	WT_0h
AT1G14520	Encodes MIOX1. Belongs to myo-inositol oxygenase gene family.	MIOX1	A3	AT1G14520_JS3	AT1G14520_P1	gun1_0h	WT_0h
AT1G14770	RING/FYVE/PHD zinc finger superfamily protein;(source:Araport11)	NA	A5	AT1G14770_P1	AT1G14770_c1	gun1_0h	WT_0h
AT1G15215	Encodes SHH1, a homeodomain protein required for DNA methylation. It is an atypical RNA-directed DNA methylation component, and functions in transcriptional silencing through both DNA methylation-dependent and -independent pathways.	DTF1,SHH1	IR	AT1G15215_ID1	AT1G15215_P4	gun1_0h	WT_0h
AT1G15470	WD40 nucleoplasmic shuttling protein that positively regulates the Abscisic acid (ABA) response by interacting with and maintaining the stability of ABI5 in the nucleus. Nuclear export of XIW1 is XPO1-dependent. Involved in regulating seed germination, primary root growth, and drought stress resistance.	NA	IR	AT1G15470_P2	AT1G15470_P1	gun1_0h	WT_0h
AT1G15690	Encodes a H(+)-translocating (pyrophosphate-energized) inorganic pyrophosphatase (H(+)-PPase; EC 3.6.1.1) located in the vacuolar membrane. Expression is found in all tissues examined, including meristems and floral organ primordium. Expression is particularly enhanced in pollen, and is repressed by light. Over expression and loss of function phenotypes suggest AVP1 is involved in regulation of a…	AtAVP1,ATAVP3,AtVHP1,AVP-3,AVP1,FUGU5,VHP1	A3	AT1G15690_ID11	AT1G15690.2	gun1_0h	WT_0h
AT1G15690	Encodes a H(+)-translocating (pyrophosphate-energized) inorganic pyrophosphatase (H(+)-PPase; EC 3.6.1.1) located in the vacuolar membrane. Expression is found in all tissues examined, including meristems and floral organ primordium. Expression is particularly enhanced in pollen, and is repressed by light. Over expression and loss of function phenotypes suggest AVP1 is involved in regulation of a…	AtAVP1,ATAVP3,AtVHP1,AVP-3,AVP1,FUGU5,VHP1	A5	AT1G15690_ID11	AT1G15690.2	gun1_0h	WT_0h
AT1G15690	Encodes a H(+)-translocating (pyrophosphate-energized) inorganic pyrophosphatase (H(+)-PPase; EC 3.6.1.1) located in the vacuolar membrane. Expression is found in all tissues examined, including meristems and floral organ primordium. Expression is particularly enhanced in pollen, and is repressed by light. Over expression and loss of function phenotypes suggest AVP1 is involved in regulation of a…	AtAVP1,ATAVP3,AtVHP1,AVP-3,AVP1,FUGU5,VHP1	ES	AT1G15690_ID11	AT1G15690.2	gun1_0h	WT_0h
AT1G15930	Ribosomal protein L7Ae/L30e/S12e/Gadd45 family protein;(source:Araport11)	NA	ES	AT1G15930_P2	AT1G15930_c1	gun1_0h	WT_0h
AT1G16060	Encodes ADAP, an AP2-domain protein that interacts with ARIA. ADAP is a positive regulator of the ABA response and is also involved in regulating seedling growth.	ADAP,WRI3	IR	AT1G16060_P3	AT1G16060_P1	gun1_0h	WT_0h
AT1G16060	Encodes ADAP, an AP2-domain protein that interacts with ARIA. ADAP is a positive regulator of the ABA response and is also involved in regulating seedling growth.	ADAP,WRI3	IR	AT1G16060_P4	AT1G16060_P1	gun1_0h	WT_0h
AT1G16650	S-adenosyl-L-methionine-dependent methyltransferases superfamily protein;(source:Araport11)	NA	A3	AT1G16650_c4	AT1G16650_P2	gun1_0h	WT_0h
AT1G16650	S-adenosyl-L-methionine-dependent methyltransferases superfamily protein;(source:Araport11)	NA	IR	AT1G16650_c4	AT1G16650_P2	gun1_0h	WT_0h
AT1G17410	Nucleoside diphosphate kinase family protein;(source:Araport11)	NA	A3	AT1G17410_c1	AT1G17410_ID15	gun1_0h	WT_0h
AT1G17410	Nucleoside diphosphate kinase family protein;(source:Araport11)	NA	IR	AT1G17410_c1	AT1G17410_ID15	gun1_0h	WT_0h
AT1G17410	Nucleoside diphosphate kinase family protein;(source:Araport11)	NA	A5	AT1G17410_c1	AT1G17410_P2	gun1_0h	WT_0h
AT1G17530	Encodes a translocase of inner mitochondrial membrane.	ATTIM23-1,TIM23-1	IR	AT1G17530_P1	AT1G17530_P2	gun1_0h	WT_0h
AT1G18070	Translation elongation factor EF1A/initiation factor IF2gamma family protein;(source:Araport11)	NA	A3	AT1G18070_P1	AT1G18070.2	gun1_0h	WT_0h
AT1G18870	Encodes a protein with isochorismate synthase activity involved in phylloquinone biosynthesis. Mutant studies of this gene's function suggest that its function is redundant with that of ICS1 (AT1G7410).	ATICS2,ICS2	IR	AT1G18870.1	AT1G18870_ID8	gun1_0h	WT_0h
AT1G19000	Homeodomain-like superfamily protein;(source:Araport11)	NA	A3	AT1G19000_P2	AT1G19000_ID16	gun1_0h	WT_0h
AT1G19000	Homeodomain-like superfamily protein;(source:Araport11)	NA	A5	AT1G19000_P2	AT1G19000_ID16	gun1_0h	WT_0h
AT1G19400	Tail-anchored (TA) OEP membrane protein which possesses a single C-terminal transmembrane domain targeting post-translationally to plastids.	E-4PDHase	A5	AT1G19400_P2	AT1G19400_P1	gun1_0h	WT_0h
AT1G19400	Tail-anchored (TA) OEP membrane protein which possesses a single C-terminal transmembrane domain targeting post-translationally to plastids.	E-4PDHase	IR	AT1G19400_P2	AT1G19400_P1	gun1_0h	WT_0h
AT1G19880	Encodes a regulator of chromatin condensation 1 (RCC1) family protein; confers plasticity of rosette diameter in response to changes in N availability.	NA	IR	AT1G19880_P1	AT1G19880_ID6	gun1_0h	WT_0h
AT1G20490	AMP-dependent synthetase and ligase family protein;(source:Araport11)	NA	IR	AT1G20490_P1	AT1G20490_P2	gun1_0h	WT_0h
AT1G22200	Endoplasmic reticulum vesicle transporter protein;(source:Araport11)	NA	A3	AT1G22200_P1	AT1G22200_ID21	gun1_0h	WT_0h
AT1G22200	Endoplasmic reticulum vesicle transporter protein;(source:Araport11)	NA	A5	AT1G22200_P1	AT1G22200_ID21	gun1_0h	WT_0h
AT1G22300	Encodes a 14-3-3 protein. This protein is reported to interact with the BZR1 transcription factor involved in brassinosteroid signaling and may affect the nucleocytoplasmic shuttling of BZR1. Might act as a stabilization factor to mediate the oligomerization of REM on the plasma membrane.	14-3-3EPSILON,GF14_EPSILON,GRF10	IR	AT1G22300.3	AT1G22300_P1	gun1_0h	WT_0h
AT1G22450	subunit 6b of cytochrome c oxidase	ATCOX6B2,COX6B	IR	AT1G22450.1	AT1G22450_ID1	gun1_0h	WT_0h
AT1G23080	Encodes a novel component of auxin efflux that is located apically in the basal cell and is involved during embryogenesis in setting up the apical-basal axis in the embryo. It is also involved in pattern specification during root development. In roots, it is expressed at lateral and basal membranes of provascular cells in the meristem and elongation zone, whereas in the columella cells it coincid…	ATPIN7,PIN7	A5	AT1G23080_c4	AT1G23080_P1	gun1_0h	WT_0h
AT1G23080	Encodes a novel component of auxin efflux that is located apically in the basal cell and is involved during embryogenesis in setting up the apical-basal axis in the embryo. It is also involved in pattern specification during root development. In roots, it is expressed at lateral and basal membranes of provascular cells in the meristem and elongation zone, whereas in the columella cells it coincid…	ATPIN7,PIN7	IR	AT1G23080_c1	AT1G23080_P1	gun1_0h	WT_0h
AT1G23080	Encodes a novel component of auxin efflux that is located apically in the basal cell and is involved during embryogenesis in setting up the apical-basal axis in the embryo. It is also involved in pattern specification during root development. In roots, it is expressed at lateral and basal membranes of provascular cells in the meristem and elongation zone, whereas in the columella cells it coincid…	ATPIN7,PIN7	IR	AT1G23080_c4	AT1G23080_P1	gun1_0h	WT_0h
AT1G23080	Encodes a novel component of auxin efflux that is located apically in the basal cell and is involved during embryogenesis in setting up the apical-basal axis in the embryo. It is also involved in pattern specification during root development. In roots, it is expressed at lateral and basal membranes of provascular cells in the meristem and elongation zone, whereas in the columella cells it coincid…	ATPIN7,PIN7	A5	AT1G23080_c1	AT1G23080_P4	gun1_0h	WT_0h
AT1G23080	Encodes a novel component of auxin efflux that is located apically in the basal cell and is involved during embryogenesis in setting up the apical-basal axis in the embryo. It is also involved in pattern specification during root development. In roots, it is expressed at lateral and basal membranes of provascular cells in the meristem and elongation zone, whereas in the columella cells it coincid…	ATPIN7,PIN7	IR	AT1G23080_c4	AT1G23080_P4	gun1_0h	WT_0h
AT1G23080	Encodes a novel component of auxin efflux that is located apically in the basal cell and is involved during embryogenesis in setting up the apical-basal axis in the embryo. It is also involved in pattern specification during root development. In roots, it is expressed at lateral and basal membranes of provascular cells in the meristem and elongation zone, whereas in the columella cells it coincid…	ATPIN7,PIN7	IR	AT1G23080_c1	AT1G23080_P4	gun1_0h	WT_0h
AT1G24330	Plant U-box type E3 ubiquitin ligase (PUB).	NA	IR	AT1G24330_P1	AT1G24330_ID1	gun1_0h	WT_0h
AT1G24330	Plant U-box type E3 ubiquitin ligase (PUB).	NA	A5	AT1G24330_P1	AT1G24330_P2	gun1_0h	WT_0h
AT1G24460	Encodes a novel protein that co-immunoprecipitates with SYP41. It is involved in vacuolar trafficking and salt tolerance, potentially via a role in vesicle fusion and in maintaining TGN structure or identity. Mutants display delayed formation of the Brefeldin A (BFA) compartment in cotyledons upon application of BFA.	TNO1	A5	AT1G24460_c1	AT1G24460_P2	gun1_0h	WT_0h
AT1G25682	coiled-coil protein (DUF572);(source:Araport11)	CWC16a	IR	AT1G25682_P1	AT1G25682_P2	gun1_0h	WT_0h
AT1G26110	Encodes Decapping 5, required for mRNA decapping, P-body formation and translational repression during postembryonic development.	DCP5	A3	AT1G26110_P1	AT1G26110_ID1	gun1_0h	WT_0h
AT1G26110	Encodes Decapping 5, required for mRNA decapping, P-body formation and translational repression during postembryonic development.	DCP5	A5	AT1G26110_P1	AT1G26110_ID1	gun1_0h	WT_0h
AT1G26110	Encodes Decapping 5, required for mRNA decapping, P-body formation and translational repression during postembryonic development.	DCP5	ES	AT1G26110_P1	AT1G26110_ID1	gun1_0h	WT_0h
AT1G26580	ELM2 domain protein;(source:Araport11)	NA	IR	AT1G26580_ID1	AT1G26580_P1	gun1_0h	WT_0h
AT1G26890	FBD, F-box and Leucine Rich Repeat domains containing protein;(source:Araport11)	NA	A3	AT1G26890_P5	AT1G26890_P2	gun1_0h	WT_0h
AT1G26890	FBD, F-box and Leucine Rich Repeat domains containing protein;(source:Araport11)	NA	A5	AT1G26890_P5	AT1G26890_P2	gun1_0h	WT_0h
AT1G26890	FBD, F-box and Leucine Rich Repeat domains containing protein;(source:Araport11)	NA	ES	AT1G26890.1	AT1G26890_P2	gun1_0h	WT_0h
AT1G26890	FBD, F-box and Leucine Rich Repeat domains containing protein;(source:Araport11)	NA	IR	AT1G26890.1	AT1G26890_P2	gun1_0h	WT_0h
AT1G26890	FBD, F-box and Leucine Rich Repeat domains containing protein;(source:Araport11)	NA	IR	AT1G26890_P5	AT1G26890_P2	gun1_0h	WT_0h
AT1G27680	ADP-glucose pyrophosphorylase catalyzes the first, rate limiting step in starch biosynthesis. The large subunit plays a regulatory role whereas the small subunit (ApS) is the catalytic isoform. Four isoforms of the large subunit (ApL1-4) have been described.Mutational analysis of APS1 suggests that APL1 and APL2 can compensate for loss of APS1 catalytic activity,suggesting both have catalytic as …	APL2	IR	AT1G27680_P1	AT1G27680_ID3	gun1_0h	WT_0h
AT1G27970	Encodes an ortholog of yeast NTF2, a nuclear envelop transport protein that functions as the nuclear import receptor for RanGDP, an essential player in nucleocytoplasmic transport. The mRNA is cell-to-cell mobile.	NTF2B	IR	AT1G27970_P1	AT1G27970.2	gun1_0h	WT_0h
AT1G29410	Encodes phosphoribosylanthranilate isomerase which catalyzes the third step in tryptophan biosynthesis.	PAI3	IR	AT1G29410_P2	AT1G29410_P1	gun1_0h	WT_0h
AT1G29410	Encodes phosphoribosylanthranilate isomerase which catalyzes the third step in tryptophan biosynthesis.	PAI3	ES	AT1G29410_P2	AT1G29410_P3	gun1_0h	WT_0h
AT1G29410	Encodes phosphoribosylanthranilate isomerase which catalyzes the third step in tryptophan biosynthesis.	PAI3	IR	AT1G29410_P2	AT1G29410_P4	gun1_0h	WT_0h
AT1G29410	Encodes phosphoribosylanthranilate isomerase which catalyzes the third step in tryptophan biosynthesis.	PAI3	ES	AT1G29410_P2	AT1G29410_s1	gun1_0h	WT_0h
AT1G29410	Encodes phosphoribosylanthranilate isomerase which catalyzes the third step in tryptophan biosynthesis.	PAI3	IR	AT1G29410_P2	AT1G29410_s1	gun1_0h	WT_0h
AT1G29630	5-3 exonuclease family protein;(source:Araport11)	NA	IR	AT1G29630.3	AT1G29630_P2	gun1_0h	WT_0h
AT1G29700	Metallo-hydrolase/oxidoreductase superfamily protein;(source:Araport11)	NA	A3	AT1G29700_c1	AT1G29700_P2	gun1_0h	WT_0h
AT1G29700	Metallo-hydrolase/oxidoreductase superfamily protein;(source:Araport11)	NA	IR	AT1G29700_c1	AT1G29700_P2	gun1_0h	WT_0h
AT1G29820	Magnesium transporter CorA-like family protein;(source:Araport11)	NA	ES	AT1G29820_s1	AT1G29820_JS1	gun1_0h	WT_0h
AT1G29820	Magnesium transporter CorA-like family protein;(source:Araport11)	NA	ES	AT1G29820_ID8	AT1G29820_JS1	gun1_0h	WT_0h
AT1G29820	Magnesium transporter CorA-like family protein;(source:Araport11)	NA	ES	AT1G29820.1	AT1G29820_JS1	gun1_0h	WT_0h
AT1G29820	Magnesium transporter CorA-like family protein;(source:Araport11)	NA	IR	AT1G29820_s1	AT1G29820_JS1	gun1_0h	WT_0h
AT1G29820	Magnesium transporter CorA-like family protein;(source:Araport11)	NA	MES	AT1G29820_ID8	AT1G29820_JS1	gun1_0h	WT_0h
AT1G30460	Encodes AtCPSF30, the 30-KDa subunit of cleavage and polyadenylation specificity factor. AtCPSF30 is a probable processing endonuclease. Nucleus-localized RNA binding protein capable of interacting with itself and with calmodulin. Its RNA-binding activity is inhibited by calmodulin in a calcium-dependent fashion.	ATCPSF30,CPSF30,OXT6	IR	AT1G30460_P1	AT1G30460_P2	gun1_0h	WT_0h
AT1G30475	hypothetical protein;(source:Araport11)	NA	A3	AT1G30475.3	AT1G30475_ID2	gun1_0h	WT_0h
AT1G30475	hypothetical protein;(source:Araport11)	NA	A5	AT1G30475.2	AT1G30475_ID2	gun1_0h	WT_0h
AT1G30475	hypothetical protein;(source:Araport11)	NA	IR	AT1G30475.2	AT1G30475_ID2	gun1_0h	WT_0h
AT1G30490	Dominant PHV mutations cause transformation of abaxial leaf fates into adaxial leaf fates. Has overlapping functions with PHABULOSA, REVOLUTA and CORONA/ATHB15 in patterning the apical portion of the embryo. Encodes a member of HD-Zip family which contains homeodomain-leucine zipper domains and domain similar to a mammalian sterol binding domain.	ATHB9,PHV	A5	AT1G30490_P1	AT1G30490_s1	gun1_0h	WT_0h
AT1G31440	SH3 domain-containing protein;(source:Araport11)	SH3P1	A3	AT1G31440_P1	AT1G31440_c1	gun1_0h	WT_0h
AT1G31440	SH3 domain-containing protein;(source:Araport11)	SH3P1	A5	AT1G31440_P1	AT1G31440_c1	gun1_0h	WT_0h
AT1G31540	Disease resistance protein (TIR-NBS-LRR class) family;(source:Araport11)	NA	IR	AT1G31540_ID4	AT1G31540_ID2	gun1_0h	WT_0h
AT1G31540	Disease resistance protein (TIR-NBS-LRR class) family;(source:Araport11)	NA	IR	AT1G31540_ID4	AT1G31540_P2	gun1_0h	WT_0h
AT1G31950	Sesterterpene synthase which produces various sesterpne backbones bia type-A cyclization mechanism.	NA	IR	AT1G31950_P2	AT1G31950_P3	gun1_0h	WT_0h
AT1G32400	TOM2A encodes a 280 amino acid putative four-pass transmembrane protein with a C-terminal farnesylation signal, essential for efficient multiplication of tobacco mosaic viruses.	TOM2A	A3	AT1G32400_P1	AT1G32400_ID4	gun1_0h	WT_0h
AT1G32460	hypothetical protein;(source:Araport11)	NA	IR	AT1G32460_ID2	AT1G32460.1	gun1_0h	WT_0h
AT1G33050	hypothetical protein;(source:Araport11)	NA	A5	AT1G33050.4	AT1G33050.1	gun1_0h	WT_0h
AT1G33050	hypothetical protein;(source:Araport11)	NA	A3	AT1G33050.4	AT1G33050_ID1	gun1_0h	WT_0h
AT1G33050	hypothetical protein;(source:Araport11)	NA	A5	AT1G33050_ID3	AT1G33050_ID1	gun1_0h	WT_0h
AT1G33050	hypothetical protein;(source:Araport11)	NA	IR	AT1G33050.4	AT1G33050_ID1	gun1_0h	WT_0h
AT1G34750	Protein phosphatase 2C family protein;(source:Araport11)	CIPP1	IR	AT1G34750_P4	AT1G34750_P1	gun1_0h	WT_0h
AT1G34760	Encodes a 14-3-3 protein. Binds H+-ATPase in response to blue light.	GF14_OMICRON,GRF11,RHS5	IR	AT1G34760_P2	AT1G34760_P1	gun1_0h	WT_0h
AT1G35516	myb-like transcription factor family protein;(source:Araport11)	NA	IR	AT1G35516.1	AT1G35516_ID1	gun1_0h	WT_0h
AT1G37130	Identified as a mutant resistant to chlorate. Encodes nitrate reductase structural gene. Involved in nitrate assimilation. Has nitrate reductase activity. Up-regulated by the fungus P. indica. Binds transcription factor At2g35940. The mRNA is cell-to-cell mobile.	ATNR2,B29,CHL3,NIA2,NIA2-1,NR,NR2	IR	AT1G37130_P1	AT1G37130_c3	gun1_0h	WT_0h
AT1G43170	Encodes a cytoplasmic ribosomal protein. The mRNA is cell-to-cell mobile.	ARP1,emb2207,RP1,RPL3A	A3	AT1G43170_P1	AT1G43170.4	gun1_0h	WT_0h
AT1G43170	Encodes a cytoplasmic ribosomal protein. The mRNA is cell-to-cell mobile.	ARP1,emb2207,RP1,RPL3A	MES	AT1G43170_P1	AT1G43170.4	gun1_0h	WT_0h
AT1G43670	Encodes a fructose-1,6-bisphosphatase. This enzyme, in addition to catalyzing the formation of fructose-6-phosphate for sucrose biosynthesis, appears to play a role in fructose-mediated signaling that is independent of its enzymatic activity. atcfbp-1/fins1 mutants have reduced photosynthetic rates, elevated levels of starch and reduced levels of sucrose during the day. Although the protein is ex…	AtcFBP,cyfbp,FBP,FINS1	A3	AT1G43670_P1	AT1G43670_ID19	gun1_0h	WT_0h
AT1G43670	Encodes a fructose-1,6-bisphosphatase. This enzyme, in addition to catalyzing the formation of fructose-6-phosphate for sucrose biosynthesis, appears to play a role in fructose-mediated signaling that is independent of its enzymatic activity. atcfbp-1/fins1 mutants have reduced photosynthetic rates, elevated levels of starch and reduced levels of sucrose during the day. Although the protein is ex…	AtcFBP,cyfbp,FBP,FINS1	A5	AT1G43670_P1	AT1G43670_ID19	gun1_0h	WT_0h
AT1G43670	Encodes a fructose-1,6-bisphosphatase. This enzyme, in addition to catalyzing the formation of fructose-6-phosphate for sucrose biosynthesis, appears to play a role in fructose-mediated signaling that is independent of its enzymatic activity. atcfbp-1/fins1 mutants have reduced photosynthetic rates, elevated levels of starch and reduced levels of sucrose during the day. Although the protein is ex…	AtcFBP,cyfbp,FBP,FINS1	MES	AT1G43670_P1	AT1G43670_ID19	gun1_0h	WT_0h
AT1G44350	encodes a protein similar to IAA amino acid conjugate hydrolase. NO-induced, involved in growth and disease resistance. Plays a positive role in the activation of SAR when challenged with the avirulent pathogen Pst DC3000 (avrB) at 5 ? 106 CFU.	ILL6	IR	AT1G44350_P1	AT1G44350_s1	gun1_0h	WT_0h
AT1G44750	Member of a family of proteins related to PUP1, a purine transporter. May be involved in the transport of purine and purine derivatives such as cytokinins, across the plasma membrane.	ATPUP11,PUP11	IR	AT1G44750_P5	AT1G44750_P6	gun1_0h	WT_0h
AT1G47056	Encodes an F-box protein. Based on genetic analysis appears to be functionally redundant with VFB2,3, and 4. When expression of all 4 genes is reduced plants show defects in growth and reduced expression of auxin response genes.	VFB1	IR	AT1G47056_P1	AT1G47056_c1	gun1_0h	WT_0h
AT1G47128	Cysteine proteinase precursor-like protein/ dehydration stress-responsive gene (RD21). Has been shown to have peptide ligase activity and protease activity in vitro. RD21 is involved in immunity to the necrotrophic fungal pathogen Botrytis cinerea.Activity detected in root, leaf, flower and cell culture.	RD21,RD21A	A3	AT1G47128_P1	AT1G47128_ID8	gun1_0h	WT_0h
AT1G47128	Cysteine proteinase precursor-like protein/ dehydration stress-responsive gene (RD21). Has been shown to have peptide ligase activity and protease activity in vitro. RD21 is involved in immunity to the necrotrophic fungal pathogen Botrytis cinerea.Activity detected in root, leaf, flower and cell culture.	RD21,RD21A	A5	AT1G47128_P1	AT1G47128_ID8	gun1_0h	WT_0h
AT1G47128	Cysteine proteinase precursor-like protein/ dehydration stress-responsive gene (RD21). Has been shown to have peptide ligase activity and protease activity in vitro. RD21 is involved in immunity to the necrotrophic fungal pathogen Botrytis cinerea.Activity detected in root, leaf, flower and cell culture.	RD21,RD21A	IR	AT1G47128_P1	AT1G47128_ID8	gun1_0h	WT_0h
AT1G47128	Cysteine proteinase precursor-like protein/ dehydration stress-responsive gene (RD21). Has been shown to have peptide ligase activity and protease activity in vitro. RD21 is involved in immunity to the necrotrophic fungal pathogen Botrytis cinerea.Activity detected in root, leaf, flower and cell culture.	RD21,RD21A	MES	AT1G47128_P1	AT1G47128_ID8	gun1_0h	WT_0h
AT1G47570	RING/U-box superfamily protein;(source:Araport11)	NA	IR	AT1G47570_P1	AT1G47570_ID5	gun1_0h	WT_0h
AT1G47570	RING/U-box superfamily protein;(source:Araport11)	NA	IR	AT1G47570_P1	AT1G47570_ID8	gun1_0h	WT_0h
AT1G47720	Encodes an organellar single-strand DNA binding protein, located in mitochondria, controls the stoichiometry of alternative mitochondrial DNA forms generated by homologous recombination.	OSB1	IR	AT1G47720_s1	AT1G47720_s2	gun1_0h	WT_0h
AT1G47740	PPPDE putative thiol peptidase family protein;(source:Araport11)	NA	A5	AT1G47740.1	AT1G47740_P3	gun1_0h	WT_0h
AT1G48360	Encodes a FAN1 homolog that is involved in interstrand crosslink repair. FAN1 appears to act in in a different pathway from MUS81 but in similar pathway with RECQ4A, RAD5A and MFH1.	FAN1	A5	AT1G48360_P5	AT1G48360_P1	gun1_0h	WT_0h
AT1G48360	Encodes a FAN1 homolog that is involved in interstrand crosslink repair. FAN1 appears to act in in a different pathway from MUS81 but in similar pathway with RECQ4A, RAD5A and MFH1.	FAN1	IR	AT1G48360_P5	AT1G48360_P1	gun1_0h	WT_0h
AT1G48360	Encodes a FAN1 homolog that is involved in interstrand crosslink repair. FAN1 appears to act in in a different pathway from MUS81 but in similar pathway with RECQ4A, RAD5A and MFH1.	FAN1	IR	AT1G48360_P2	AT1G48360_P1	gun1_0h	WT_0h
AT1G48520	Encodes Glu-tRNA(Gln) amidotransferase subunit B (from Genbank record AF239836).	GATB	IR	AT1G48520_P1	AT1G48520_P2	gun1_0h	WT_0h
AT1G49010	Duplicated homeodomain-like superfamily protein;(source:Araport11)	MYBS1	IR	AT1G49010_P1	AT1G49010_ID1	gun1_0h	WT_0h
AT1G50140	P-loop containing nucleoside triphosphate hydrolases superfamily protein;(source:Araport11)	NA	A3	AT1G50140_s6	AT1G50140_s3	gun1_0h	WT_0h
AT1G50140	P-loop containing nucleoside triphosphate hydrolases superfamily protein;(source:Araport11)	NA	A5	AT1G50140_s6	AT1G50140_s3	gun1_0h	WT_0h
AT1G50140	P-loop containing nucleoside triphosphate hydrolases superfamily protein;(source:Araport11)	NA	ES	AT1G50140_s6	AT1G50140_s3	gun1_0h	WT_0h
AT1G50140	P-loop containing nucleoside triphosphate hydrolases superfamily protein;(source:Araport11)	NA	IR	AT1G50140_s6	AT1G50140_s3	gun1_0h	WT_0h
AT1G50200	Alanyl-tRNA synthetase;(source:Araport11)	ACD,ALATS	IR	AT1G50200_P1	AT1G50200_ID2	gun1_0h	WT_0h
AT1G50480	10-formyltetrahydrofolate synthetase (THFS) mRNA, complete The mRNA is cell-to-cell mobile.	THFS	A3	AT1G50480_P1	AT1G50480_ID2	gun1_0h	WT_0h
AT1G50480	10-formyltetrahydrofolate synthetase (THFS) mRNA, complete The mRNA is cell-to-cell mobile.	THFS	A5	AT1G50480_P1	AT1G50480_ID2	gun1_0h	WT_0h
AT1G50570	Calcium-dependent lipid-binding (CaLB domain) family protein;(source:Araport11)	NA	A5	AT1G50570_P1	AT1G50570_P2	gun1_0h	WT_0h
AT1G50970	Membrane trafficking VPS53 family protein;(source:Araport11)	NA	A5	AT1G50970_JS7	AT1G50970_ID19	gun1_0h	WT_0h
AT1G50970	Membrane trafficking VPS53 family protein;(source:Araport11)	NA	IR	AT1G50970_JS7	AT1G50970_ID19	gun1_0h	WT_0h
AT1G51720	Amino acid dehydrogenase family protein;(source:Araport11)	NA	A3	AT1G51720_P3	AT1G51720_s3	gun1_0h	WT_0h
AT1G51720	Amino acid dehydrogenase family protein;(source:Araport11)	NA	A5	AT1G51720_c1	AT1G51720_s3	gun1_0h	WT_0h
AT1G51745	Tudor/PWWP/MBT superfamily protein;(source:Araport11)	PWWP2,SL1	IR	AT1G51745_P1	AT1G51745.1	gun1_0h	WT_0h
AT1G52000	Mannose-binding lectin superfamily protein;(source:Araport11)	NA	A3	AT1G52000_P1	AT1G52000_JS5	gun1_0h	WT_0h
AT1G52360	Coatomer, beta subunit;(source:Araport11)	NA	A5	AT1G52360_P1	AT1G52360_P3	gun1_0h	WT_0h
AT1G52730	Transducin/WD40 repeat-like superfamily protein;(source:Araport11)	NA	IR	AT1G52730_P2	AT1G52730_P1	gun1_0h	WT_0h
AT1G53590	Calcium-dependent lipid-binding (CaLB domain) family protein;(source:Araport11)	NTMC2T6.1,NTMC2TYPE6.1	IR	AT1G53590_P1	AT1G53590_ID3	gun1_0h	WT_0h
AT1G54220	Encodes a subunit of the mitochondrial pyruvate dehydrogenase complex.	mtE2-3	A3	AT1G54220_c1	AT1G54220_P1	gun1_0h	WT_0h
AT1G54390	ING2 encodes a member of the Inhibitor of Growth family of nuclear-localized PhD domain containing homeodomain proteins. Binds to H3K4 di or trimethylated DNA.	ING2	IR	AT1G54390_P4	AT1G54390_c1	gun1_0h	WT_0h
AT1G54660	Possibly not a pseudogene based on evidence for transcription (RNA-seq) and translation (Ribo-seq) described in PMID:27791167	NA	A5	AT1G54660.1	AT1G54660_JC42	gun1_0h	WT_0h
AT1G54660	Possibly not a pseudogene based on evidence for transcription (RNA-seq) and translation (Ribo-seq) described in PMID:27791167	NA	IR	AT1G54660.1	AT1G54660_JC42	gun1_0h	WT_0h
AT1G54660	Possibly not a pseudogene based on evidence for transcription (RNA-seq) and translation (Ribo-seq) described in PMID:27791167	NA	IR	AT1G54660.1	AT1G54660_JC44	gun1_0h	WT_0h
AT1G54660	Possibly not a pseudogene based on evidence for transcription (RNA-seq) and translation (Ribo-seq) described in PMID:27791167	NA	A5	AT1G54660.1	AT1G54660_s3	gun1_0h	WT_0h
AT1G54660	Possibly not a pseudogene based on evidence for transcription (RNA-seq) and translation (Ribo-seq) described in PMID:27791167	NA	IR	AT1G54660.1	AT1G54660_s3	gun1_0h	WT_0h
AT1G54680	translation initiation factor 3 subunit I;(source:Araport11)	NA	A3	AT1G54680_P1	AT1G54680.2	gun1_0h	WT_0h
AT1G55675	transmembrane protein;(source:Araport11)	NA	A5	AT1G55675_ID3	AT1G55675_P1	gun1_0h	WT_0h
AT1G55675	transmembrane protein;(source:Araport11)	NA	IR	AT1G55675_ID3	AT1G55675_P1	gun1_0h	WT_0h
AT1G55830	coiled-coil protein;(source:Araport11)	NA	A3	AT1G55830_s1	AT1G55830_P2	gun1_0h	WT_0h
AT1G55830	coiled-coil protein;(source:Araport11)	NA	IR	AT1G55830_s1	AT1G55830_P2	gun1_0h	WT_0h
AT1G56070	encodes a translation elongation factor 2-like protein that is involved in cold-induced translation. Mutations in this gene specifically blocks low temperature-induced transcription of cold-responsive genes but induces the expression of CBF genes and mutants carrying the recessive mutations fail to acclimate to cold and is freezing sensitive.	LOS1	IR	AT1G56070_P1	AT1G56070_ID2	gun1_0h	WT_0h
AT1G56090	Tetratricopeptide repeat (TPR)-like superfamily protein;(source:Araport11)	NA	A3	AT1G56090_c2	AT1G56090_P2	gun1_0h	WT_0h
AT1G58025	DNA-binding bromodomain-containing protein;(source:Araport11)	NA	A3	AT1G58025_ID10	AT1G58025_s3	gun1_0h	WT_0h
AT1G58025	DNA-binding bromodomain-containing protein;(source:Araport11)	NA	A3	AT1G58025_P1	AT1G58025_s3	gun1_0h	WT_0h
AT1G58025	DNA-binding bromodomain-containing protein;(source:Araport11)	NA	A5	AT1G58025_P1	AT1G58025_s3	gun1_0h	WT_0h
AT1G58025	DNA-binding bromodomain-containing protein;(source:Araport11)	NA	A5	AT1G58025_JS14	AT1G58025_s3	gun1_0h	WT_0h
AT1G58025	DNA-binding bromodomain-containing protein;(source:Araport11)	NA	IR	AT1G58025_JS14	AT1G58025_s3	gun1_0h	WT_0h
AT1G58025	DNA-binding bromodomain-containing protein;(source:Araport11)	NA	IR	AT1G58025_P1	AT1G58025_s3	gun1_0h	WT_0h
AT1G58025	DNA-binding bromodomain-containing protein;(source:Araport11)	NA	IR	AT1G58025_ID10	AT1G58025_s3	gun1_0h	WT_0h
AT1G58410	Disease resistance protein (CC-NBS-LRR class) family;(source:Araport11)	NA	A5	AT1G58410_P1	AT1G58410_P2	gun1_0h	WT_0h
AT1G58807	Disease resistance protein (CC-NBS-LRR class) family;(source:Araport11)	NA	IR	AT1G58807_P2	AT1G58807_JC5	gun1_0h	WT_0h
AT1G60990	Encodes a chloroplast-localized COG0354 protein that requires folate for its function in Fe/S cluster biogenesis.	IBA57.2	A3	AT1G60990_ID21	AT1G60990_ID24	gun1_0h	WT_0h
AT1G60990	Encodes a chloroplast-localized COG0354 protein that requires folate for its function in Fe/S cluster biogenesis.	IBA57.2	A3	AT1G60990_P3	AT1G60990_ID24	gun1_0h	WT_0h
AT1G60990	Encodes a chloroplast-localized COG0354 protein that requires folate for its function in Fe/S cluster biogenesis.	IBA57.2	IR	AT1G60990_P3	AT1G60990_ID24	gun1_0h	WT_0h
AT1G61250	Encodes a putative secretory carrier membrane protein (SC3). The mRNA is cell-to-cell mobile.	AtSCAMP1,SC3,SCAMP1	A3	AT1G61250_P1	AT1G61250.2	gun1_0h	WT_0h
AT1G61250	Encodes a putative secretory carrier membrane protein (SC3). The mRNA is cell-to-cell mobile.	AtSCAMP1,SC3,SCAMP1	A5	AT1G61250_P1	AT1G61250.2	gun1_0h	WT_0h
AT1G61280	Phosphatidylinositol N-acetylglucosaminyltransferase, GPI19/PIG-P subunit;(source:Araport11)	NA	IR	AT1G61280_ID2	AT1G61280.1	gun1_0h	WT_0h
AT1G61360	S-locus lectin protein kinase family protein;(source:Araport11)	NA	IR	AT1G61360_ID4	AT1G61360_s1	gun1_0h	WT_0h
AT1G61430	S-locus lectin protein kinase family protein;(source:Araport11)	NA	IR	AT1G61430_P11	AT1G61430_P13	gun1_0h	WT_0h
AT1G61430	S-locus lectin protein kinase family protein;(source:Araport11)	NA	A3	AT1G61430_P11	AT1G61430_P9	gun1_0h	WT_0h
AT1G61520	PSI type III chlorophyll a/b-binding protein (Lhca3*1) The mRNA is cell-to-cell mobile.	LHCA3	IR	AT1G61520_P1	AT1G61520.3	gun1_0h	WT_0h
AT1G61790	Encodes the OST3/6 subunit of the hetero-oligomeric plant oligosaccharyltransferase complex (OST). Also identified by GWAS as having a role in interspecific pollen tube recognition.	ARTUMES,OST3/6	IR	AT1G61790_P1	AT1G61790_P2	gun1_0h	WT_0h
AT1G62660	Glycosyl hydrolases family 32 protein;(source:Araport11)	VI1	IR	AT1G62660_P1	AT1G62660_P2	gun1_0h	WT_0h
AT1G62960	Encodes an aminotransferase with broad specificity for aspartate and aromatic amino aids such as tyrosine and phenylalanine. It does not act on branched chain amino acids and does not have ACC synthase activity.	ACS10	A3	AT1G62960_P1	AT1G62960_c1	gun1_0h	WT_0h
AT1G63270	Encodes a member of a heterogenous group of non-intrinsic ATP-binding cassette (ABC) proteins. Members of this group bear no close resemblance to each other nor to representatives of specific ABC protein subfamilies from other organisms. This grouping is arbitrary and will likely change upon acquisition of further data.	ABCI1,AtCCMA,ATNAP10,NAP10	A5	AT1G63270_JC1	AT1G63270.1	gun1_0h	WT_0h
AT1G63610	hypothetical protein;(source:Araport11)	NA	A3	AT1G63610_P1	AT1G63610_P2	gun1_0h	WT_0h
AT1G63610	hypothetical protein;(source:Araport11)	NA	IR	AT1G63610_P1	AT1G63610_P2	gun1_0h	WT_0h
AT1G63660	GMP synthase (glutamine-hydrolyzing), putative / glutamine amidotransferase;(source:Araport11)	NA	A3	AT1G63660_P1	AT1G63660_ID1	gun1_0h	WT_0h
AT1G63660	GMP synthase (glutamine-hydrolyzing), putative / glutamine amidotransferase;(source:Araport11)	NA	A5	AT1G63660_P1	AT1G63660_ID1	gun1_0h	WT_0h
AT1G63660	GMP synthase (glutamine-hydrolyzing), putative / glutamine amidotransferase;(source:Araport11)	NA	MES	AT1G63660_P1	AT1G63660_ID1	gun1_0h	WT_0h
AT1G64060	Interacts with AtrbohD gene to fine tune the spatial control of ROI production and hypersensitive response to cell in and around infection site.	ATRBOH_F,ATRBOHF,RBOH_F,RBOHAP108,RBOHF	A5	AT1G64060_P1	AT1G64060_s1	gun1_0h	WT_0h
AT1G64090	Reticulan like protein B3;(source:Araport11)	RTN3,RTNLB3	IR	AT1G64090_P1	AT1G64090_c1	gun1_0h	WT_0h
AT1G65720	transmembrane protein;(source:Araport11)	NA	IR	AT1G65720_P1	AT1G65720_JC1	gun1_0h	WT_0h
AT1G66200	encodes a cytosolic glutamate synthetase, this enzyme has low affinity with substrate ammonium	ATGSR2,GLN12,GSR2	A3	AT1G66200_P1	AT1G66200.2	gun1_0h	WT_0h
AT1G66200	encodes a cytosolic glutamate synthetase, this enzyme has low affinity with substrate ammonium	ATGSR2,GLN12,GSR2	ES	AT1G66200_P1	AT1G66200.2	gun1_0h	WT_0h
AT1G66240	homolog of anti-oxidant 1;(source:Araport11)	ATATX1,ATX1	ES	AT1G66240_P1	AT1G66240.3	gun1_0h	WT_0h
AT1G67710	Encodes an Arabidopsis response regulator (ARR) protein that acts in concert with other type-B ARRs in the cytokinin signaling pathway. Affects ABA-JA crosstalk.	ARR11	IR	AT1G67710_P2	AT1G67710_P1	gun1_0h	WT_0h
AT1G67710	Encodes an Arabidopsis response regulator (ARR) protein that acts in concert with other type-B ARRs in the cytokinin signaling pathway. Affects ABA-JA crosstalk.	ARR11	A5	AT1G67710_P2	AT1G67710_P3	gun1_0h	WT_0h
AT1G67710	Encodes an Arabidopsis response regulator (ARR) protein that acts in concert with other type-B ARRs in the cytokinin signaling pathway. Affects ABA-JA crosstalk.	ARR11	IR	AT1G67710_P2	AT1G67710_P3	gun1_0h	WT_0h
AT1G69310	Encodes WRKY57, a member of the WRKY Transcription Factor. Activation of WRKY57 confers drought tolerance.	ATWRKY57,WRKY57	IR	AT1G69310_s2	AT1G69310_ID4	gun1_0h	WT_0h
AT1G69510	cAMP-regulated phosphoprotein 19-related protein;(source:Araport11)	NA	A3	AT1G69510_P1	AT1G69510_ID1	gun1_0h	WT_0h
AT1G69980	structural polyprotein;(source:Araport11)	NA	IR	AT1G69980_P1	AT1G69980_ID2	gun1_0h	WT_0h
AT1G70190	ribosomal protein L7/L12 domain-containing protein;(source:Araport11)	NA	IR	AT1G70190_P2	AT1G70190_P1	gun1_0h	WT_0h
AT1G71810	Protein kinase superfamily protein;(source:Araport11)	NA	A5	AT1G71810_c3	AT1G71810_ID60	gun1_0h	WT_0h
AT1G71810	Protein kinase superfamily protein;(source:Araport11)	NA	A3	AT1G71810_c3	AT1G71810_P1	gun1_0h	WT_0h
AT1G71810	Protein kinase superfamily protein;(source:Araport11)	NA	A5	AT1G71810_c3	AT1G71810_P1	gun1_0h	WT_0h
AT1G72150	novel cell-plate-associated protein that is related in sequence to proteins involved in membrane trafficking in other eukaryotes The mRNA is cell-to-cell mobile.	PATL1	A3	AT1G72150_P1	AT1G72150_ID5	gun1_0h	WT_0h
AT1G72150	novel cell-plate-associated protein that is related in sequence to proteins involved in membrane trafficking in other eukaryotes The mRNA is cell-to-cell mobile.	PATL1	IR	AT1G72150_P1	AT1G72150_ID5	gun1_0h	WT_0h
AT1G72320	Encodes a member of the Arabidopsis Pumilio (APUM) proteins containing PUF domain (eight repeats of approximately 36 amino acids each). PUF proteins regulate both mRNA stability and translation through sequence-specific binding to the 3' UTR of target mRNA transcripts.	APUM23,PUM23	A3	AT1G72320_s1	AT1G72320_ID7	gun1_0h	WT_0h
AT1G72320	Encodes a member of the Arabidopsis Pumilio (APUM) proteins containing PUF domain (eight repeats of approximately 36 amino acids each). PUF proteins regulate both mRNA stability and translation through sequence-specific binding to the 3' UTR of target mRNA transcripts.	APUM23,PUM23	A5	AT1G72320_s1	AT1G72320_ID7	gun1_0h	WT_0h
AT1G72370	acidic protein associated to 40S ribosomal subunit of ribosomes. Involved in polysome formation during active protein synthesis. Expressed in actively growing tissue.	AP40,P40,RP40,RPSAA	A3	AT1G72370_P1	AT1G72370_ID6	gun1_0h	WT_0h
AT1G72370	acidic protein associated to 40S ribosomal subunit of ribosomes. Involved in polysome formation during active protein synthesis. Expressed in actively growing tissue.	AP40,P40,RP40,RPSAA	MES	AT1G72370_P1	AT1G72370_ID6	gun1_0h	WT_0h
AT1G72640	NAD(P)-binding Rossmann-fold superfamily protein;(source:Araport11)	NA	A3	AT1G72640_ID20	AT1G72640_ID14	gun1_0h	WT_0h
AT1G72640	NAD(P)-binding Rossmann-fold superfamily protein;(source:Araport11)	NA	A3	AT1G72640_ID20	AT1G72640_P3	gun1_0h	WT_0h
AT1G72640	NAD(P)-binding Rossmann-fold superfamily protein;(source:Araport11)	NA	A3	AT1G72640_ID19	AT1G72640_P3	gun1_0h	WT_0h
AT1G72640	NAD(P)-binding Rossmann-fold superfamily protein;(source:Araport11)	NA	IR	AT1G72640_ID20	AT1G72640_P3	gun1_0h	WT_0h
AT1G72640	NAD(P)-binding Rossmann-fold superfamily protein;(source:Araport11)	NA	IR	AT1G72640_ID19	AT1G72640_P3	gun1_0h	WT_0h
AT1G72990	beta-galactosidase 17;(source:Araport11)	BGAL17	A3	AT1G72990_ID2	AT1G72990_JC3	gun1_0h	WT_0h
AT1G72990	beta-galactosidase 17;(source:Araport11)	BGAL17	IR	AT1G72990_ID2	AT1G72990_JC3	gun1_0h	WT_0h
AT1G72990	beta-galactosidase 17;(source:Araport11)	BGAL17	A3	AT1G72990_ID2	AT1G72990_JS3	gun1_0h	WT_0h
AT1G73110	P-loop containing nucleoside triphosphate hydrolases superfamily protein;(source:Araport11)	NA	IR	AT1G73110_P1	AT1G73110_ID2	gun1_0h	WT_0h
AT1G73300	serine carboxypeptidase-like 2;(source:Araport11)	scpl2	ES	AT1G73300_c1	AT1G73300_P1	gun1_0h	WT_0h
AT1G73490	RNA-binding (RRM/RBD/RNP motifs) family protein;(source:Araport11)	NA	A3	AT1G73490_P1	AT1G73490.2	gun1_0h	WT_0h
AT1G73490	RNA-binding (RRM/RBD/RNP motifs) family protein;(source:Araport11)	NA	A3	AT1G73490_P1	AT1G73490_ID6	gun1_0h	WT_0h
AT1G73490	RNA-binding (RRM/RBD/RNP motifs) family protein;(source:Araport11)	NA	IR	AT1G73490_P1	AT1G73490_ID6	gun1_0h	WT_0h
AT1G73960	Member of TFIID complex.	TAF2	A3	AT1G73960_JS18	AT1G73960_P1	gun1_0h	WT_0h
AT1G74230	encodes a glycine-rich RNA binding protein. The mRNA is cell-to-cell mobile.	GR-RBP5,ORRM4,RBGA2	A5	AT1G74230_P1	AT1G74230_JS1	gun1_0h	WT_0h
AT1G74230	encodes a glycine-rich RNA binding protein. The mRNA is cell-to-cell mobile.	GR-RBP5,ORRM4,RBGA2	IR	AT1G74230_P1	AT1G74230_JS1	gun1_0h	WT_0h
AT1G74300	alpha/beta-Hydrolases superfamily protein;(source:Araport11)	NA	A3	AT1G74300_ID2	AT1G74300_P1	gun1_0h	WT_0h
AT1G74300	alpha/beta-Hydrolases superfamily protein;(source:Araport11)	NA	IR	AT1G74300_ID2	AT1G74300_P1	gun1_0h	WT_0h
AT1G74650	Member of the R2R3 factor gene family.	ATMYB31,ATY13,MYB31	IR	AT1G74650_P3	AT1G74650_P1	gun1_0h	WT_0h
AT1G75000	ELO family protein.	ELO3	A3	AT1G75000_ID2	AT1G75000_ID1	gun1_0h	WT_0h
AT1G75000	ELO family protein.	ELO3	IR	AT1G75000_ID2	AT1G75000_ID1	gun1_0h	WT_0h
AT1G75410	BEL1-like homeodomain 3 (BLH3)	BLH3	A5	AT1G75410_JC10	AT1G75410_ID2	gun1_0h	WT_0h
AT1G75410	BEL1-like homeodomain 3 (BLH3)	BLH3	IR	AT1G75410_JC10	AT1G75410_ID2	gun1_0h	WT_0h
AT1G75420	UDP-Glycosyltransferase superfamily protein;(source:Araport11)	NA	IR	AT1G75420_P1	AT1G75420_P3	gun1_0h	WT_0h
AT1G76280	Tetratricopeptide repeat (TPR)-like superfamily protein;(source:Araport11)	NA	A3	AT1G76280_JS5	AT1G76280_s3	gun1_0h	WT_0h
AT1G76440	HSP20-like chaperones superfamily protein;(source:Araport11)	NA	IR	AT1G76440_P1	AT1G76440_c1	gun1_0h	WT_0h
AT1G76580	Squamosa promoter-binding protein-like (SBP domain) transcription factor family protein;(source:Araport11)	NA	A3	AT1G76580_P1	AT1G76580_ID2	gun1_0h	WT_0h
AT1G76580	Squamosa promoter-binding protein-like (SBP domain) transcription factor family protein;(source:Araport11)	NA	IR	AT1G76580_P1	AT1G76580_P2	gun1_0h	WT_0h
AT1G77000	AtSKP2;2 is a homolog of human SKP2, the human F-box protein that recruits E2F1. Contains an F-box motif at the N-terminal region and a C-terminal Leu-rich repeat domain. Forms part of an E3-ubiquitin-ligase SCF (Skp1, cullin, F-box) complex and recruits phosphorylated AtE2Fc, a transcriptional factor that might play a role in cell division and during the transition from skotomorphogenesis to pho…	ATSKP22,SKP2B	A5	AT1G77000_P1	AT1G77000_P2	gun1_0h	WT_0h
AT1G77000	AtSKP2;2 is a homolog of human SKP2, the human F-box protein that recruits E2F1. Contains an F-box motif at the N-terminal region and a C-terminal Leu-rich repeat domain. Forms part of an E3-ubiquitin-ligase SCF (Skp1, cullin, F-box) complex and recruits phosphorylated AtE2Fc, a transcriptional factor that might play a role in cell division and during the transition from skotomorphogenesis to pho…	ATSKP22,SKP2B	IR	AT1G77000_P1	AT1G77000_P2	gun1_0h	WT_0h
AT1G77000	AtSKP2;2 is a homolog of human SKP2, the human F-box protein that recruits E2F1. Contains an F-box motif at the N-terminal region and a C-terminal Leu-rich repeat domain. Forms part of an E3-ubiquitin-ligase SCF (Skp1, cullin, F-box) complex and recruits phosphorylated AtE2Fc, a transcriptional factor that might play a role in cell division and during the transition from skotomorphogenesis to pho…	ATSKP22,SKP2B	IR	AT1G77000_P1	AT1G77000_s1	gun1_0h	WT_0h
AT1G77210	AtSTP14 belongs to the family of sugar transport proteins (AtSTPs)in volved in monosaccharide transport. Heterologous expression in yeast revealed that AtSTP14 is the transporter specifc for galactose and does not transport other monosaccharides such as glucose or fructose.	AtSTP14,STP14	IR	AT1G77210_P2	AT1G77210.1	gun1_0h	WT_0h
AT1G77210	AtSTP14 belongs to the family of sugar transport proteins (AtSTPs)in volved in monosaccharide transport. Heterologous expression in yeast revealed that AtSTP14 is the transporter specifc for galactose and does not transport other monosaccharides such as glucose or fructose.	AtSTP14,STP14	IR	AT1G77210_P2	AT1G77210_P3	gun1_0h	WT_0h
AT1G78040	Pollen Ole e 1 allergen and extensin family protein;(source:Araport11)	NA	A3	AT1G78040_JS1	AT1G78040_JS2	gun1_0h	WT_0h
AT1G78040	Pollen Ole e 1 allergen and extensin family protein;(source:Araport11)	NA	A5	AT1G78040_JS1	AT1G78040_JS2	gun1_0h	WT_0h
AT1G79529	Natural antisense transcript overlaps with AT1G79530;(source:Araport11)	NA	IR	AT1G79529_ID2	AT1G79529_ID1	gun1_0h	WT_0h
AT1G79640	Protein kinase superfamily protein;(source:Araport11)	NA	A5	AT1G79640_P2	AT1G79640_P4	gun1_0h	WT_0h
AT1G79640	Protein kinase superfamily protein;(source:Araport11)	NA	IR	AT1G79640_P2	AT1G79640_P4	gun1_0h	WT_0h
AT1G79880	RNA recognition motif (RRM)-containing protein;(source:Araport11)	AtLa2,La2	A5	AT1G79880_P1	AT1G79880.3	gun1_0h	WT_0h
AT1G79880	RNA recognition motif (RRM)-containing protein;(source:Araport11)	AtLa2,La2	IR	AT1G79880_P1	AT1G79880.3	gun1_0h	WT_0h
AT1G79880	RNA recognition motif (RRM)-containing protein;(source:Araport11)	AtLa2,La2	IR	AT1G79880_P1	AT1G79880_P2	gun1_0h	WT_0h
AT1G80060	Ubiquitin-like superfamily protein;(source:Araport11)	NA	A5	AT1G80060_P3	AT1G80060_JS1	gun1_0h	WT_0h
AT1G80060	Ubiquitin-like superfamily protein;(source:Araport11)	NA	IR	AT1G80060_P3	AT1G80060_JS1	gun1_0h	WT_0h
AT1G80360	Encodes a methionine-specific aminotransferase that uses the ethylene biosynthetic intermediate methionine as an amino donor and the auxin biosynthetic intermediate indole-3-pyruvic acid as an amino acceptor to produce L-tryptophan and 2-oxo-4-methylthiobutyric acid. These actions allow VAS1 to coordinate both auxin and ethylene biosynthesis. It functions downstream of TAA1/SAV3 but upstream of Y…	ISS1,VAS1	IR	AT1G80360_P1	AT1G80360_c1	gun1_0h	WT_0h
AT1G80380	encodes a glycerate kinase which catalyzes the last step of photorespiration C2 cycle.	GLYK	IR	AT1G80380_P3	AT1G80380_P8	gun1_0h	WT_0h
AT1G80780	Deadenylase.	NA	IR	AT1G80780_P2	AT1G80780_P1	gun1_0h	WT_0h
AT2G01850	EXGT-A3 has homology to xyloglucan endotransglucosylases/hydrolases (XTHs). Mutants in this gene show a lesion mimic phenotype associated with leaf maturation and a reduction in the number of tertiary veins. Individual tracheary elements in the mutants are shorter, but phloem transport activity is not severely affected. EXGT-A3 plays a role in xyloglucan degradation in the differentiating trachea…	ATXTH27,EXGT-A3,XTH27	IR	AT2G01850_s1	AT2G01850_P1	gun1_0h	WT_0h
AT2G02370	SNARE associated Golgi protein family;(source:Araport11)	NA	IR	AT2G02370_P1	AT2G02370_JS1	gun1_0h	WT_0h
AT2G03667	Asparagine synthase family protein;(source:Araport11)	NA	A3	AT2G03667_P2	AT2G03667_ID3	gun1_0h	WT_0h
AT2G03667	Asparagine synthase family protein;(source:Araport11)	NA	IR	AT2G03667_P2	AT2G03667_ID3	gun1_0h	WT_0h
AT2G05380	glycine-rich protein 3 short isoform (GRP3S) mRNA, complete The mRNA is cell-to-cell mobile.	GRP3S	A3	AT2G05380_P3	AT2G05380_ID2	gun1_0h	WT_0h
AT2G05380	glycine-rich protein 3 short isoform (GRP3S) mRNA, complete The mRNA is cell-to-cell mobile.	GRP3S	A5	AT2G05380_P3	AT2G05380_ID2	gun1_0h	WT_0h
AT2G05380	glycine-rich protein 3 short isoform (GRP3S) mRNA, complete The mRNA is cell-to-cell mobile.	GRP3S	IR	AT2G05380_P3	AT2G05380_ID2	gun1_0h	WT_0h
AT2G05380	glycine-rich protein 3 short isoform (GRP3S) mRNA, complete The mRNA is cell-to-cell mobile.	GRP3S	A3	AT2G05380_P3	AT2G05380_s2	gun1_0h	WT_0h
AT2G05380	glycine-rich protein 3 short isoform (GRP3S) mRNA, complete The mRNA is cell-to-cell mobile.	GRP3S	A5	AT2G05380_P3	AT2G05380_s2	gun1_0h	WT_0h
AT2G05380	glycine-rich protein 3 short isoform (GRP3S) mRNA, complete The mRNA is cell-to-cell mobile.	GRP3S	A5	AT2G05380_s1	AT2G05380_s2	gun1_0h	WT_0h
AT2G05380	glycine-rich protein 3 short isoform (GRP3S) mRNA, complete The mRNA is cell-to-cell mobile.	GRP3S	A5	AT2G05380_s3	AT2G05380_s2	gun1_0h	WT_0h
AT2G05380	glycine-rich protein 3 short isoform (GRP3S) mRNA, complete The mRNA is cell-to-cell mobile.	GRP3S	IR	AT2G05380_P3	AT2G05380_s2	gun1_0h	WT_0h
AT2G05440	GLYCINE RICH PROTEIN 9;(source:Araport11)	ATGRP9,GRP9	A3	AT2G05440_P2	AT2G05440_JC19	gun1_0h	WT_0h
AT2G05440	GLYCINE RICH PROTEIN 9;(source:Araport11)	ATGRP9,GRP9	A5	AT2G05440_P2	AT2G05440_JC19	gun1_0h	WT_0h
AT2G05440	GLYCINE RICH PROTEIN 9;(source:Araport11)	ATGRP9,GRP9	IR	AT2G05440_P2	AT2G05440_JC19	gun1_0h	WT_0h
AT2G05710	Encodes an aconitase that can catalyze the conversion of citrate to isocitrate through a cis-aconitate intermediate, indicating that it may participate in the TCA cycle and other primary metabolic pathways. The protein is believed to accumulate in the mitochondria and the cytosol. It affects CSD2 (At2g28190 - a superoxide dismutase) transcript levels and may play a role in the response to oxidati…	ACO3	A3	AT2G05710_P1	AT2G05710_ID13	gun1_0h	WT_0h
AT2G05710	Encodes an aconitase that can catalyze the conversion of citrate to isocitrate through a cis-aconitate intermediate, indicating that it may participate in the TCA cycle and other primary metabolic pathways. The protein is believed to accumulate in the mitochondria and the cytosol. It affects CSD2 (At2g28190 - a superoxide dismutase) transcript levels and may play a role in the response to oxidati…	ACO3	A5	AT2G05710_P1	AT2G05710_ID13	gun1_0h	WT_0h
AT2G06050	Encodes a 12-oxophytodienoate reductase that is required for jasmonate biosynthesis. Mutants are male sterile and defective in pollen dehiscence. Shows activity towards 2,4,6-trinitrotoluene. CFA-Ile, CFA-Leu, CFA-Val, CFA-Met and CFA-Ala can restore the fertility of opr3 plants by inducing filament elongation and anther dehiscence.	AtOPR3,DDE1,OPR3	A5	AT2G06050_ID5	AT2G06050_P1	gun1_0h	WT_0h
AT2G06050	Encodes a 12-oxophytodienoate reductase that is required for jasmonate biosynthesis. Mutants are male sterile and defective in pollen dehiscence. Shows activity towards 2,4,6-trinitrotoluene. CFA-Ile, CFA-Leu, CFA-Val, CFA-Met and CFA-Ala can restore the fertility of opr3 plants by inducing filament elongation and anther dehiscence.	AtOPR3,DDE1,OPR3	A5	AT2G06050_P3	AT2G06050_P1	gun1_0h	WT_0h
AT2G06050	Encodes a 12-oxophytodienoate reductase that is required for jasmonate biosynthesis. Mutants are male sterile and defective in pollen dehiscence. Shows activity towards 2,4,6-trinitrotoluene. CFA-Ile, CFA-Leu, CFA-Val, CFA-Met and CFA-Ala can restore the fertility of opr3 plants by inducing filament elongation and anther dehiscence.	AtOPR3,DDE1,OPR3	IR	AT2G06050_ID5	AT2G06050_P1	gun1_0h	WT_0h
AT2G11280	pseudogene of P-loop nucleoside triphosphate hydrolases superfamily protein with CH (Calponin Homology) domain-containing protein;(source:Araport11)	NA	A3	AT2G11280_s3	AT2G11280_s5	gun1_0h	WT_0h
AT2G13440	glucose-inhibited division family A protein;(source:Araport11)	NA	IR	AT2G13440_P1	AT2G13440_s2	gun1_0h	WT_0h
AT2G13650	Encodes a Golgi-localized GDP-mannose transporter. It can transport ADP-glucose in vitro.	GONST1	IR	AT2G13650_P1	AT2G13650.3	gun1_0h	WT_0h
AT2G13790	somatic embryogenesis receptor-like kinase 4;(source:Araport11)	ATSERK4,BAK7,BKK1,SERK4	A3	AT2G13790_ID2	AT2G13790_s1	gun1_0h	WT_0h
AT2G13790	somatic embryogenesis receptor-like kinase 4;(source:Araport11)	ATSERK4,BAK7,BKK1,SERK4	IR	AT2G13790_ID2	AT2G13790_s1	gun1_0h	WT_0h
AT2G14090	pseudogene of F-box/RNI-like superfamily protein;(source:Araport11)	NA	IR	AT2G14090.1	AT2G14090_ID2	gun1_0h	WT_0h
AT2G14285	Small nuclear ribonucleoprotein family protein;(source:Araport11)	NA	A3	AT2G14285_s3	AT2G14285.1	gun1_0h	WT_0h
AT2G14285	Small nuclear ribonucleoprotein family protein;(source:Araport11)	NA	IR	AT2G14285_s3	AT2G14285.1	gun1_0h	WT_0h
AT2G14285	Small nuclear ribonucleoprotein family protein;(source:Araport11)	NA	ES	AT2G14285_s3	AT2G14285_s2	gun1_0h	WT_0h
AT2G14285	Small nuclear ribonucleoprotein family protein;(source:Araport11)	NA	IR	AT2G14285_s3	AT2G14285_s2	gun1_0h	WT_0h
AT2G14285	Small nuclear ribonucleoprotein family protein;(source:Araport11)	NA	MES	AT2G14285_s3	AT2G14285_s2	gun1_0h	WT_0h
AT2G15290	Encodes a protein located in the chloroplast inner envelope. The study of mutant defective in the gene product suggests that the protein is involved in the translocation of protein across the envelope membrane into the chloroplast stroma.	AtTic21,CIA5,PIC1,TIC21	A3	AT2G15290_P1	AT2G15290_ID1	gun1_0h	WT_0h
AT2G15290	Encodes a protein located in the chloroplast inner envelope. The study of mutant defective in the gene product suggests that the protein is involved in the translocation of protein across the envelope membrane into the chloroplast stroma.	AtTic21,CIA5,PIC1,TIC21	A5	AT2G15290_P1	AT2G15290_ID1	gun1_0h	WT_0h
AT2G16700	Encodes actin depolymerizing factor 5 (ADF5).	ADF5,ATADF5	IR	AT2G16700_s1	AT2G16700_P3	gun1_0h	WT_0h
AT2G16700	Encodes actin depolymerizing factor 5 (ADF5).	ADF5,ATADF5	IR	AT2G16700_s1	AT2G16700_P4	gun1_0h	WT_0h
AT2G16940	Splicing factor which interacts with IRR and SR45 to mediate pre-mRNA splicing to facilitate protein function, however not contributing to target specificity.	NA	A3	AT2G16940_P1	AT2G16940_ID4	gun1_0h	WT_0h
AT2G16940	Splicing factor which interacts with IRR and SR45 to mediate pre-mRNA splicing to facilitate protein function, however not contributing to target specificity.	NA	IR	AT2G16940_P1	AT2G16940_ID4	gun1_0h	WT_0h
AT2G16940	Splicing factor which interacts with IRR and SR45 to mediate pre-mRNA splicing to facilitate protein function, however not contributing to target specificity.	NA	MES	AT2G16940_P1	AT2G16940_ID4	gun1_0h	WT_0h
AT2G17360	Ribosomal protein S4 (RPS4A) family protein;(source:Araport11)	NA	IR	AT2G17360_P1	AT2G17360.2	gun1_0h	WT_0h
AT2G17730	Intrinsic thylakoid membrane protein that fixes RPOTmp on the stromal side of the thylakoid membrane.	NIP2	A3	AT2G17730_P1	AT2G17730_c1	gun1_0h	WT_0h
AT2G17730	Intrinsic thylakoid membrane protein that fixes RPOTmp on the stromal side of the thylakoid membrane.	NIP2	IR	AT2G17730_P1	AT2G17730_c1	gun1_0h	WT_0h
AT2G18050	encodes a structurally divergent linker histone whose gene expression is induced by dehydration and ABA. The mRNA is cell-to-cell mobile.	HIS1-3	IR	AT2G18050_P1	AT2G18050.2	gun1_0h	WT_0h
AT2G18700	Encodes an enzyme putatively involved in trehalose biosynthesis. The protein has a trehalose synthase (TPS)-like domain that may or may not be active as well as a trehalose phosphatase (TPP)-like domain.	ATTPS11,ATTPSB,TPS11,TPS11	IR	AT2G18700_P1	AT2G18700_ID2	gun1_0h	WT_0h
AT2G19260	RING/FYVE/PHD zinc finger superfamily protein;(source:Araport11)	NA	A5	AT2G19260_P2	AT2G19260.1	gun1_0h	WT_0h
AT2G20320	DENN (AEX-3) domain-containing protein;(source:Araport11)	NA	IR	AT2G20320_P2	AT2G20320.1	gun1_0h	WT_0h
AT2G20860	LIP1,Lipoic acid synthase,	LIP1	IR	AT2G20860_P2	AT2G20860_P1	gun1_0h	WT_0h
AT2G21160	Translocon-associated protein (TRAP), alpha subunit;(source:Araport11)	NA	A3	AT2G21160_P1	AT2G21160.2	gun1_0h	WT_0h
AT2G21160	Translocon-associated protein (TRAP), alpha subunit;(source:Araport11)	NA	A5	AT2G21160_P1	AT2G21160.2	gun1_0h	WT_0h
AT2G21160	Translocon-associated protein (TRAP), alpha subunit;(source:Araport11)	NA	ES	AT2G21160_P1	AT2G21160.2	gun1_0h	WT_0h
AT2G21660	Encodes a small glycine-rich RNA binding protein that is part of a negative-feedback loop through which AtGRP7 regulates the circadian oscillations of its own transcript. Gene expression is induced by cold. GRP7 appears to promote stomatal opening and reduce tolerance under salt and dehydration stress conditions, but, promotes stomatal closing and thereby increases stress tolerance under conditio…	ATGRP7,CCR2,GR-RBP7,GRP7,RBGA3	A5	AT2G21660_JS19	AT2G21660_JS20	gun1_0h	WT_0h
AT2G22530	Alkaline-phosphatase-like family protein;(source:Araport11)	NA	IR	AT2G22530_s1	AT2G22530_JC20	gun1_0h	WT_0h
AT2G22530	Alkaline-phosphatase-like family protein;(source:Araport11)	NA	A3	AT2G22530_s1	AT2G22530_JC3	gun1_0h	WT_0h
AT2G22730	Major facilitator superfamily protein;(source:Araport11)	NA	ES	AT2G22730_c4	AT2G22730_c2	gun1_0h	WT_0h
AT2G22730	Major facilitator superfamily protein;(source:Araport11)	NA	IR	AT2G22730_c4	AT2G22730_c2	gun1_0h	WT_0h
AT2G22730	Major facilitator superfamily protein;(source:Araport11)	NA	A3	AT2G22730_c4	AT2G22730_ID135	gun1_0h	WT_0h
AT2G22730	Major facilitator superfamily protein;(source:Araport11)	NA	ES	AT2G22730_c4	AT2G22730_ID135	gun1_0h	WT_0h
AT2G22730	Major facilitator superfamily protein;(source:Araport11)	NA	IR	AT2G22730_c4	AT2G22730_ID135	gun1_0h	WT_0h
AT2G23390	acyl-CoA;(source:Araport11)	NA	IR	AT2G23390_P1	AT2G23390_P2	gun1_0h	WT_0h
AT2G23590	Encodes a protein shown to have carboxylesterase activity in vitro. It has similarity to the SABP2 methyl salicylate esterase from tobacco. This protein does not act on methyl IAA, methyl JA, MeSA, MeGA4, or MEGA9 in vitro.	ATMES8,MES8	A5	AT2G23590_c1	AT2G23590_P1	gun1_0h	WT_0h
AT2G24690	Transcriptional factor B3 family protein;(source:Araport11)	NA	A5	AT2G24690_s4	AT2G24690_s2	gun1_0h	WT_0h
AT2G24690	Transcriptional factor B3 family protein;(source:Araport11)	NA	A5	AT2G24690_ID1	AT2G24690_s2	gun1_0h	WT_0h
AT2G24690	Transcriptional factor B3 family protein;(source:Araport11)	NA	IR	AT2G24690_s4	AT2G24690_s2	gun1_0h	WT_0h
AT2G24690	Transcriptional factor B3 family protein;(source:Araport11)	NA	IR	AT2G24690_ID1	AT2G24690_s2	gun1_0h	WT_0h
AT2G24690	Transcriptional factor B3 family protein;(source:Araport11)	NA	MES	AT2G24690_s4	AT2G24690_s2	gun1_0h	WT_0h
AT2G25080	Encodes glutathione peroxidase. The mRNA is cell-to-cell mobile.	ATGPX1,GPX1,GPXL1	A5	AT2G25080_P1	AT2G25080_ID1	gun1_0h	WT_0h
AT2G25590	Plant Tudor-like protein;(source:Araport11)	NA	IR	AT2G25590_ID50	AT2G25590_s3	gun1_0h	WT_0h
AT2G25590	Plant Tudor-like protein;(source:Araport11)	NA	IR	AT2G25590_ID12	AT2G25590_s3	gun1_0h	WT_0h
AT2G25730	zinc finger FYVE domain protein;(source:Araport11)	NA	A3	AT2G25730_P3	AT2G25730_JC3	gun1_0h	WT_0h
AT2G25730	zinc finger FYVE domain protein;(source:Araport11)	NA	IR	AT2G25730_P3	AT2G25730_JC3	gun1_0h	WT_0h
AT2G26310	Encodes a plastid stroma localized fatty acid binding protein.	AtFAP2,FAP2	ES	AT2G26310_c1	AT2G26310_P1	gun1_0h	WT_0h
AT2G26310	Encodes a plastid stroma localized fatty acid binding protein.	AtFAP2,FAP2	IR	AT2G26310_P5	AT2G26310_P1	gun1_0h	WT_0h
AT2G26810	Putative methyltransferase family protein;(source:Araport11)	NA	IR	AT2G26810_P2	AT2G26810_JS1	gun1_0h	WT_0h
AT2G26980	encodes a serine-threonine protein kinase whose expression increases in response to abscisic acid, cold, drought, high salt, and wounding conditions. The gene is expressed in developing seeds and seedlings. Lines carrying a T-DNA insertions have reduced germination efficiency and expression of cold, high-salt, and abscisic acid marker genes are altered, but not drought-response markers.	CIPK3,SnRK3.17	A3	AT2G26980_P3	AT2G26980_ID6	gun1_0h	WT_0h
AT2G26980	encodes a serine-threonine protein kinase whose expression increases in response to abscisic acid, cold, drought, high salt, and wounding conditions. The gene is expressed in developing seeds and seedlings. Lines carrying a T-DNA insertions have reduced germination efficiency and expression of cold, high-salt, and abscisic acid marker genes are altered, but not drought-response markers.	CIPK3,SnRK3.17	A5	AT2G26980_P3	AT2G26980_ID6	gun1_0h	WT_0h
AT2G26980	encodes a serine-threonine protein kinase whose expression increases in response to abscisic acid, cold, drought, high salt, and wounding conditions. The gene is expressed in developing seeds and seedlings. Lines carrying a T-DNA insertions have reduced germination efficiency and expression of cold, high-salt, and abscisic acid marker genes are altered, but not drought-response markers.	CIPK3,SnRK3.17	ES	AT2G26980_P3	AT2G26980_ID6	gun1_0h	WT_0h
AT2G26980	encodes a serine-threonine protein kinase whose expression increases in response to abscisic acid, cold, drought, high salt, and wounding conditions. The gene is expressed in developing seeds and seedlings. Lines carrying a T-DNA insertions have reduced germination efficiency and expression of cold, high-salt, and abscisic acid marker genes are altered, but not drought-response markers.	CIPK3,SnRK3.17	IR	AT2G26980_P3	AT2G26980_ID6	gun1_0h	WT_0h
AT2G27100	Identified as a leaf form mutant by Redei having serrated leaves. Further analysis of the single loss of function allele indicated pleiotropic effects extending to many aspects of shoot development such as taller meristems, alterations in phase transition, phyllotaxy and branching. Encodes a single zinc finger containing protein that is expressed in meristems and organ primordia and forms a compl…	SE	IR	AT2G27100_P1	AT2G27100_c2	gun1_0h	WT_0h
AT2G27150	Encodes the aldehyde oxidase delta isoform catalyzing the final step in abscisic acid biosynthesis.	AAO3,AOdelta,At-AO3,AtAAO3	IR	AT2G27150_P3	AT2G27150_P6	gun1_0h	WT_0h
AT2G27950	Ring/U-Box superfamily protein;(source:Araport11)	NA	IR	AT2G27950_s2	AT2G27950_P1	gun1_0h	WT_0h
AT2G28310	trimethylguanosine synthase (DUF707);(source:Araport11)	NA	A3	AT2G28310_ID26	AT2G28310_ID68	gun1_0h	WT_0h
AT2G28310	trimethylguanosine synthase (DUF707);(source:Araport11)	NA	A5	AT2G28310_ID26	AT2G28310_ID68	gun1_0h	WT_0h
AT2G28310	trimethylguanosine synthase (DUF707);(source:Araport11)	NA	IR	AT2G28310_ID26	AT2G28310_ID68	gun1_0h	WT_0h
AT2G28540	RNA binding (RRM/RBD/RNP motifs) family protein;(source:Araport11)	NA	IR	AT2G28540_P2	AT2G28540.1	gun1_0h	WT_0h
AT2G28940	Protein kinase superfamily protein;(source:Araport11)	NA	A3	AT2G28940_ID3	AT2G28940.1	gun1_0h	WT_0h
AT2G28940	Protein kinase superfamily protein;(source:Araport11)	NA	IR	AT2G28940_ID3	AT2G28940.1	gun1_0h	WT_0h
AT2G29190	Encodes a member of the Arabidopsis Pumilio (APUM) proteins containing PUF domain (eight repeats of approximately 36 amino acids each). PUF proteins regulate both mRNA stability and translation through sequence-specific binding to the 3' UTR of target mRNA transcripts.	APUM2,PUM2	A3	AT2G29190.2	AT2G29190_P1	gun1_0h	WT_0h
AT2G29190	Encodes a member of the Arabidopsis Pumilio (APUM) proteins containing PUF domain (eight repeats of approximately 36 amino acids each). PUF proteins regulate both mRNA stability and translation through sequence-specific binding to the 3' UTR of target mRNA transcripts.	APUM2,PUM2	A3	AT2G29190_ID5	AT2G29190_P1	gun1_0h	WT_0h
AT2G29190	Encodes a member of the Arabidopsis Pumilio (APUM) proteins containing PUF domain (eight repeats of approximately 36 amino acids each). PUF proteins regulate both mRNA stability and translation through sequence-specific binding to the 3' UTR of target mRNA transcripts.	APUM2,PUM2	IR	AT2G29190_ID5	AT2G29190_P1	gun1_0h	WT_0h
AT2G29310	NAD(P)-binding Rossmann-fold superfamily protein;(source:Araport11)	NA	IR	AT2G29310_P3	AT2G29310_P1	gun1_0h	WT_0h
AT2G29620	dentin sialophosphoprotein;(source:Araport11)	NA	A3	AT2G29620_c1	AT2G29620_P2	gun1_0h	WT_0h
AT2G30170	Encodes a chloroplast PP2C phosphatase that is required for efficient dephosphorylation of PSII proteins and involved in light acclimation.Loss of function enhances immunity to bacterial pathogens.	PBCP	IR	AT2G30170_P1	AT2G30170_ID12	gun1_0h	WT_0h
AT2G30170	Encodes a chloroplast PP2C phosphatase that is required for efficient dephosphorylation of PSII proteins and involved in light acclimation.Loss of function enhances immunity to bacterial pathogens.	PBCP	IR	AT2G30170_P1	AT2G30170_P5	gun1_0h	WT_0h
AT2G31350	Encodes a mitochondrial glyoxalase 2 that can accommodate a number of different metal centers and with the predominant metal center being Fe(III)Zn(II).	GLX2-5	A5	AT2G31350_c1	AT2G31350_P1	gun1_0h	WT_0h
AT2G32180	plastid transcriptionally active 18;(source:Araport11)	PTAC18	A3	AT2G32180.1	AT2G32180_ID1	gun1_0h	WT_0h
AT2G32180	plastid transcriptionally active 18;(source:Araport11)	PTAC18	A5	AT2G32180.1	AT2G32180_JC2	gun1_0h	WT_0h
AT2G32180	plastid transcriptionally active 18;(source:Araport11)	PTAC18	A3	AT2G32180.1	AT2G32180_s1	gun1_0h	WT_0h
AT2G32180	plastid transcriptionally active 18;(source:Araport11)	PTAC18	A5	AT2G32180.1	AT2G32180_s1	gun1_0h	WT_0h
AT2G32650	RmlC-like cupins superfamily protein;(source:Araport11)	NA	A5	AT2G32650.1	AT2G32650_ID1	gun1_0h	WT_0h
AT2G32650	RmlC-like cupins superfamily protein;(source:Araport11)	NA	IR	AT2G32650.1	AT2G32650_ID1	gun1_0h	WT_0h
AT2G33205	Serinc-domain containing serine and sphingolipid biosynthesis protein;(source:Araport11)	NA	IR	AT2G33205_s2	AT2G33205_P7	gun1_0h	WT_0h
AT2G33480	NAC domain containing protein 41;(source:Araport11)	ANAC041,NAC041	A3	AT2G33480.2	AT2G33480_ID4	gun1_0h	WT_0h
AT2G33480	NAC domain containing protein 41;(source:Araport11)	ANAC041,NAC041	IR	AT2G33480.2	AT2G33480_ID4	gun1_0h	WT_0h
AT2G34010	verprolin;(source:Araport11)	TIE4	IR	AT2G34010_P2	AT2G34010_P1	gun1_0h	WT_0h
AT2G34170	hypothetical protein (DUF688);(source:Araport11)	NA	IR	AT2G34170_P1	AT2G34170_P2	gun1_0h	WT_0h
AT2G34770	encodes a fatty acid hydroxylase, required for the AtBI-1-mediated suppression of programmed cell death.	ATFAH1,FAH1	ES	AT2G34770.1	AT2G34770_ID5	gun1_0h	WT_0h
AT2G35390	Phosphoribosyltransferase family protein;(source:Araport11)	NA	IR	AT2G35390_P2	AT2G35390_P1	gun1_0h	WT_0h
AT2G36900	member of Membrin Gene Family	ATMEMB11,MEMB11	IR	AT2G36900_P1	AT2G36900_P2	gun1_0h	WT_0h
AT2G37040	Encodes PAL1, a phenylalanine ammonia-lyase. Arabidopsis has four PALs: AT2G37040 (PAL1), AT3G53260 (PAL2), AT5G04230 (PAL3) and AT3G10340 (PAL4).	ATPAL1,PAL1	IR	AT2G37040_P1	AT2G37040_c1	gun1_0h	WT_0h
AT2G37340	encodes an RS-containing Zinc knuckle protein with molecular mass of 33kDa that is localized to nuclear specks. Barta et al (2010) have proposed a nomenclature for Serine/Arginine-Rich Protein Splicing Factors (SR proteins): Plant Cell. 2010, 22:2926.	AT-RS2Z33,ATRSZ33,RS2Z33,RSZ33	IR	AT2G37340.1	AT2G37340_ID6	gun1_0h	WT_0h
AT2G39110	Protein kinase superfamily protein;(source:Araport11)	NA	A5	AT2G39110_P1	AT2G39110_P2	gun1_0h	WT_0h
AT2G39280	Ypt/Rab-GAP domain of gyp1p superfamily protein;(source:Araport11)	NA	A5	AT2G39280_s4	AT2G39280_c4	gun1_0h	WT_0h
AT2G39280	Ypt/Rab-GAP domain of gyp1p superfamily protein;(source:Araport11)	NA	IR	AT2G39280_s4	AT2G39280_P1	gun1_0h	WT_0h
AT2G39470	PsbP-like protein 2;(source:Araport11)	PnsL1,PPL2	IR	AT2G39470_P1	AT2G39470_ID5	gun1_0h	WT_0h
AT2G39800	encodes a delta1-pyrroline-5-carboxylate synthase that catalyzes the rate-limiting enzyme in the biosynthesis of proline. Gene is expressed in reproductive organs and tissues under non-stress conditions but in the whole plant under water-limiting condition. Expression is also induced by abscisic acid and salt stress in a light-dependent manner. encodes a delta1-pyrroline-5-carboxylate synthase th…	ATP5CS,P5CS1	IR	AT2G39800.4	AT2G39800.1	gun1_0h	WT_0h
AT2G40110	Yippee family putative zinc-binding protein;(source:Araport11)	NA	IR	AT2G40110_P1	AT2G40110_ID5	gun1_0h	WT_0h
AT2G40640	Plant U-box type E3 ubiquitin ligase (PUB).	NA	A5	AT2G40640_ID4	AT2G40640_ID7	gun1_0h	WT_0h
AT2G40640	Plant U-box type E3 ubiquitin ligase (PUB).	NA	IR	AT2G40640_ID4	AT2G40640_ID7	gun1_0h	WT_0h
AT2G40640	Plant U-box type E3 ubiquitin ligase (PUB).	NA	IR	AT2G40640.1	AT2G40640_ID7	gun1_0h	WT_0h
AT2G40820	stomatal closure actin-binding-like protein;(source:Araport11)	NA	A3	AT2G40820_P4	AT2G40820_c2	gun1_0h	WT_0h
AT2G40935	PLAC8 family protein;(source:Araport11)	NA	A5	AT2G40935_ID4	AT2G40935_ID5	gun1_0h	WT_0h
AT2G40935	PLAC8 family protein;(source:Araport11)	NA	IR	AT2G40935_JS12	AT2G40935_ID5	gun1_0h	WT_0h
AT2G40935	PLAC8 family protein;(source:Araport11)	NA	IR	AT2G40935_JS12	AT2G40935_P9	gun1_0h	WT_0h
AT2G41020	WW domain-containing protein;(source:Araport11)	NA	A5	AT2G41020_s1	AT2G41020_P1	gun1_0h	WT_0h
AT2G41060	RNA-binding (RRM/RBD/RNP motifs) family protein;(source:Araport11)	NA	IR	AT2G41060_JC6	AT2G41060_P3	gun1_0h	WT_0h
AT2G41560	Encodes a calmodulin-regulated Ca(2+)-ATPase that improves salt tolerance in yeast. Localized to the vacuole. Lesion mimic phenotype when mutation in the gene is combined with a mutation in ACA11. Lesion mimic phenotype of double knockout can be suppressed by nutritional supplements that increase anion levels (e.g. 15 mM Nitrate, Chloride, or Phosphate).	ACA4	A3	AT2G41560_P1	AT2G41560_c2	gun1_0h	WT_0h
AT2G41560	Encodes a calmodulin-regulated Ca(2+)-ATPase that improves salt tolerance in yeast. Localized to the vacuole. Lesion mimic phenotype when mutation in the gene is combined with a mutation in ACA11. Lesion mimic phenotype of double knockout can be suppressed by nutritional supplements that increase anion levels (e.g. 15 mM Nitrate, Chloride, or Phosphate).	ACA4	ES	AT2G41560_P1	AT2G41560_c2	gun1_0h	WT_0h
AT2G41840	Ribosomal protein S5 family protein;(source:Araport11)	NA	A3	AT2G41840_P1	AT2G41840_ID19	gun1_0h	WT_0h
AT2G41840	Ribosomal protein S5 family protein;(source:Araport11)	NA	IR	AT2G41840_P1	AT2G41840_ID19	gun1_0h	WT_0h
AT2G41880	Guanylate kinase. Involved in nucleotide metabolism.	AGK1,GK-1	A5	AT2G41880_P1	AT2G41880_ID39	gun1_0h	WT_0h
AT2G41880	Guanylate kinase. Involved in nucleotide metabolism.	AGK1,GK-1	ES	AT2G41880_P1	AT2G41880_ID39	gun1_0h	WT_0h
AT2G41880	Guanylate kinase. Involved in nucleotide metabolism.	AGK1,GK-1	A5	AT2G41880_s2	AT2G41880_P5	gun1_0h	WT_0h
AT2G41880	Guanylate kinase. Involved in nucleotide metabolism.	AGK1,GK-1	ES	AT2G41880_s2	AT2G41880_P5	gun1_0h	WT_0h
AT2G41880	Guanylate kinase. Involved in nucleotide metabolism.	AGK1,GK-1	IR	AT2G41880_s2	AT2G41880_P5	gun1_0h	WT_0h
AT2G41880	Guanylate kinase. Involved in nucleotide metabolism.	AGK1,GK-1	IR	AT2G41880_P1	AT2G41880_P5	gun1_0h	WT_0h
AT2G42170	Actin family protein;(source:Araport11)	NA	A3	AT2G42170_c1	AT2G42170_P4	gun1_0h	WT_0h
AT2G42170	Actin family protein;(source:Araport11)	NA	A5	AT2G42170_P2	AT2G42170_P4	gun1_0h	WT_0h
AT2G42170	Actin family protein;(source:Araport11)	NA	IR	AT2G42170_c1	AT2G42170_P4	gun1_0h	WT_0h
AT2G42170	Actin family protein;(source:Araport11)	NA	IR	AT2G42170_P2	AT2G42170_P4	gun1_0h	WT_0h
AT2G42190	rho GTPase-activating gacO-like protein;(source:Araport11)	NA	IR	AT2G42190_P1	AT2G42190_P2	gun1_0h	WT_0h
AT2G42300	Together with bHLH60 associates with phytochrome interacting factor 7 to regulate hypocotyl elongation.	NA	A5	AT2G42300_P1	AT2G42300_s1	gun1_0h	WT_0h
AT2G42330	Transmembrane kinase involved in auxin signaling. Phosphorylates T101 of TAA1 to inactive the transaminase and block auxin biosynthesis.	NA	IR	AT2G42330_P2	AT2G42330_ID2	gun1_0h	WT_0h
AT2G42960	Protein kinase superfamily protein;(source:Araport11)	NA	A3	AT2G42960_s3	AT2G42960_P3	gun1_0h	WT_0h
AT2G42960	Protein kinase superfamily protein;(source:Araport11)	NA	A5	AT2G42960_s3	AT2G42960_P3	gun1_0h	WT_0h
AT2G42960	Protein kinase superfamily protein;(source:Araport11)	NA	A5	AT2G42960_JS3	AT2G42960_P3	gun1_0h	WT_0h
AT2G42960	Protein kinase superfamily protein;(source:Araport11)	NA	IR	AT2G42960_JS3	AT2G42960_P3	gun1_0h	WT_0h
AT2G42960	Protein kinase superfamily protein;(source:Araport11)	NA	IR	AT2G42960_s3	AT2G42960_P3	gun1_0h	WT_0h
AT2G43160	Involved in plant trans-Golgi network (TGN) transport.	NA	A3	AT2G43160_P1	AT2G43160.4	gun1_0h	WT_0h
AT2G43160	Involved in plant trans-Golgi network (TGN) transport.	NA	A5	AT2G43160_P3	AT2G43160.4	gun1_0h	WT_0h
AT2G43160	Involved in plant trans-Golgi network (TGN) transport.	NA	A5	AT2G43160_P1	AT2G43160.4	gun1_0h	WT_0h
AT2G43160	Involved in plant trans-Golgi network (TGN) transport.	NA	A3	AT2G43160_P1	AT2G43160_ID6	gun1_0h	WT_0h
AT2G43160	Involved in plant trans-Golgi network (TGN) transport.	NA	A5	AT2G43160_P1	AT2G43160_ID6	gun1_0h	WT_0h
AT2G43160	Involved in plant trans-Golgi network (TGN) transport.	NA	A5	AT2G43160_P3	AT2G43160_ID6	gun1_0h	WT_0h
AT2G43160	Involved in plant trans-Golgi network (TGN) transport.	NA	MES	AT2G43160_P1	AT2G43160_ID6	gun1_0h	WT_0h
AT2G43160	Involved in plant trans-Golgi network (TGN) transport.	NA	MES	AT2G43160_P3	AT2G43160_ID6	gun1_0h	WT_0h
AT2G43490	Ypt/Rab-GAP domain of gyp1p superfamily protein;(source:Araport11)	NA	A3	AT2G43490.4	AT2G43490_JC7	gun1_0h	WT_0h
AT2G43490	Ypt/Rab-GAP domain of gyp1p superfamily protein;(source:Araport11)	NA	A3	AT2G43490.3	AT2G43490_JC7	gun1_0h	WT_0h
AT2G43490	Ypt/Rab-GAP domain of gyp1p superfamily protein;(source:Araport11)	NA	A5	AT2G43490_P8	AT2G43490_JC7	gun1_0h	WT_0h
AT2G45200	Encodes a member of the GOS1 (Golgi SNARE) gene family.	ATGOS12,GOS12	A3	AT2G45200_P1	AT2G45200_c1	gun1_0h	WT_0h
AT2G45200	Encodes a member of the GOS1 (Golgi SNARE) gene family.	ATGOS12,GOS12	IR	AT2G45200_P1	AT2G45200_c1	gun1_0h	WT_0h
AT2G45380	myeloid leukemia factor;(source:Araport11)	NA	A3	AT2G45380_ID12	AT2G45380_P2	gun1_0h	WT_0h
AT2G45380	myeloid leukemia factor;(source:Araport11)	NA	IR	AT2G45380_ID12	AT2G45380_P2	gun1_0h	WT_0h
AT2G45950	SKP1-like 20;(source:Araport11)	ASK20,SK20	A3	AT2G45950_P2	AT2G45950_ID60	gun1_0h	WT_0h
AT2G45950	SKP1-like 20;(source:Araport11)	ASK20,SK20	IR	AT2G45950_P2	AT2G45950_ID60	gun1_0h	WT_0h
AT2G45950	SKP1-like 20;(source:Araport11)	ASK20,SK20	A5	AT2G45950_P2	AT2G45950_P5	gun1_0h	WT_0h
AT2G45950	SKP1-like 20;(source:Araport11)	ASK20,SK20	IR	AT2G45950_P2	AT2G45950_P5	gun1_0h	WT_0h
AT2G46320	Mitochondrial substrate carrier family protein;(source:Araport11)	NA	A3	AT2G46320_c1	AT2G46320_ID2	gun1_0h	WT_0h
AT2G46320	Mitochondrial substrate carrier family protein;(source:Araport11)	NA	IR	AT2G46320_c1	AT2G46320_ID2	gun1_0h	WT_0h
AT2G46320	Mitochondrial substrate carrier family protein;(source:Araport11)	NA	A3	AT2G46320_c1	AT2G46320_P5	gun1_0h	WT_0h
AT2G46320	Mitochondrial substrate carrier family protein;(source:Araport11)	NA	IR	AT2G46320_c1	AT2G46320_P5	gun1_0h	WT_0h
AT2G46550	transmembrane protein;(source:Araport11)	NA	A3	AT2G46550_P1	AT2G46550_s1	gun1_0h	WT_0h
AT2G46590	Encodes a protein containing Dof zinc finger motifs that is a positive regulator of light-mediated seed germination. Its expression is limited to vascular system of the mother plant. A recessive mutation is inherited as maternal-effect and expression is not detected in the embryo. Mutants are defective in seed germination and are more dependent on light and cold treatment and less sensitive to gi…	DAG2	A5	AT2G46590_P1	AT2G46590_P2	gun1_0h	WT_0h
AT2G46590	Encodes a protein containing Dof zinc finger motifs that is a positive regulator of light-mediated seed germination. Its expression is limited to vascular system of the mother plant. A recessive mutation is inherited as maternal-effect and expression is not detected in the embryo. Mutants are defective in seed germination and are more dependent on light and cold treatment and less sensitive to gi…	DAG2	IR	AT2G46590_P1	AT2G46590_P2	gun1_0h	WT_0h
AT2G46800	Encodes a member of the zinc transporter (ZAT) and cation diffusion facilitator (CDF) families. It is expressed throughout the plant, especially in dividing, differentiating and expanding cells. The protein is localized to the vacuolar membrane. Mediates Zn ion homeostasis.	ATCDF1,ATMTP1,MTP1,OZS1,ZAT,ZAT1	ES	AT2G46800_JS3	AT2G46800_P2	gun1_0h	WT_0h
AT2G46830	Encodes a transcriptional repressor that performs overlapping functions with LHY in a regulatory feedback loop that is closely associated with the circadian oscillator of Arabidopsis. Binds to the evening element in the promoter of TOC1 and represses TOC1 transcription. CCA1 and LHY colocalize in the nucleus and form heterodimers in vivo. CCA1 and LHY function synergistically in regulating circad…	AtCCA1,CCA1	A5	AT2G46830_P1	AT2G46830_c1	gun1_0h	WT_0h
AT2G47020	Peptide chain release factor 1;(source:Araport11)	NA	A3	AT2G47020_P1	AT2G47020_ID5	gun1_0h	WT_0h
AT2G47020	Peptide chain release factor 1;(source:Araport11)	NA	A5	AT2G47020_P1	AT2G47020_ID8	gun1_0h	WT_0h
AT2G47380	Cytochrome c oxidase subunit Vc family protein;(source:Araport11)	NA	A5	AT2G47380_P1	AT2G47380_P2	gun1_0h	WT_0h
AT2G47450	A component of the chloroplast signal recognition particle pathway that is involved in LHCP targeting. It is downregulated in response to high light. It recognizes the DPLG motif in Lhcb1. The mRNA is cell-to-cell mobile.	CAO,CPSRP43	IR	AT2G47450_P1	AT2G47450_s1	gun1_0h	WT_0h
AT2G47640	Small nuclear ribonucleoprotein family protein;(source:Araport11)	NA	A5	AT2G47640_ID5	AT2G47640_ID1	gun1_0h	WT_0h
AT2G47640	Small nuclear ribonucleoprotein family protein;(source:Araport11)	NA	IR	AT2G47640_ID5	AT2G47640_ID1	gun1_0h	WT_0h
AT2G48070	Encodes a chloroplast protein RPH1 (resistance to Phytophthora 1). Involved in immune response to Phytophthora brassicae. rph1 mutant plants (in Ws background) are susceptible to P. brassicae.	RPH1	IR	AT2G48070_ID1	AT2G48070_ID3	gun1_0h	WT_0h
AT3G01500	Encodes a putative beta-carbonic anhydrase betaCA1. Together with betaCA4 (At1g70410) regulates CO2-controlled stomatal movements in guard cells, as well as attenuates immunity. Differential CA gene expression in response to changing atmospheric CO2 conditions contribute to altered disease resistance levels. Activated by OXS2 under the treatment of salt.	ATBCA1,ATSABP3,CA1,SABP3	IR	AT3G01500_ID11	AT3G01500.2	gun1_0h	WT_0h
AT3G02200	Proteasome component (PCI) domain protein;(source:Araport11)	NA	IR	AT3G02200_P2	AT3G02200_JS1	gun1_0h	WT_0h
AT3G02470	Encodes a S-adenosylmethionine decarboxylase involved in polyamine biosynthesis.	SAMDC	IR	AT3G02470_JS3	AT3G02470_JC2	gun1_0h	WT_0h
AT3G02600	Encodes phosphatidic acid phosphatase. Expressed during germination.	ATLPP3,LPP3	A3	AT3G02600_P9	AT3G02600_JC23	gun1_0h	WT_0h
AT3G02600	Encodes phosphatidic acid phosphatase. Expressed during germination.	ATLPP3,LPP3	IR	AT3G02600_P9	AT3G02600_JC23	gun1_0h	WT_0h
AT3G02600	Encodes phosphatidic acid phosphatase. Expressed during germination.	ATLPP3,LPP3	MES	AT3G02600_P9	AT3G02600_JC23	gun1_0h	WT_0h
AT3G02890	PHD protein which cooperates with PAIPP2 and BAH domain protein AIPP3 to read H3K4 histone marks. The BAH-PHD bivalent histone reader complex silences a substantial subset of H3K27me3-enriched loci, including development and stress response-related genes. Interacts with BDT1, acts with other PHD proteins to associate with flowering genes and thereby suppress their transcription.	AIPP2	A3	AT3G02890_P4	AT3G02890_c1	gun1_0h	WT_0h
AT3G02890	PHD protein which cooperates with PAIPP2 and BAH domain protein AIPP3 to read H3K4 histone marks. The BAH-PHD bivalent histone reader complex silences a substantial subset of H3K27me3-enriched loci, including development and stress response-related genes. Interacts with BDT1, acts with other PHD proteins to associate with flowering genes and thereby suppress their transcription.	AIPP2	IR	AT3G02890_P4	AT3G02890_c1	gun1_0h	WT_0h
AT3G02890	PHD protein which cooperates with PAIPP2 and BAH domain protein AIPP3 to read H3K4 histone marks. The BAH-PHD bivalent histone reader complex silences a substantial subset of H3K27me3-enriched loci, including development and stress response-related genes. Interacts with BDT1, acts with other PHD proteins to associate with flowering genes and thereby suppress their transcription.	AIPP2	IR	AT3G02890_P1	AT3G02890_P3	gun1_0h	WT_0h
AT3G02890	PHD protein which cooperates with PAIPP2 and BAH domain protein AIPP3 to read H3K4 histone marks. The BAH-PHD bivalent histone reader complex silences a substantial subset of H3K27me3-enriched loci, including development and stress response-related genes. Interacts with BDT1, acts with other PHD proteins to associate with flowering genes and thereby suppress their transcription.	AIPP2	IR	AT3G02890_P4	AT3G02890_P3	gun1_0h	WT_0h
AT3G03340	LUC7 related protein;(source:Araport11)	LUC7A,UNE6	IR	AT3G03340_P3	AT3G03340.1	gun1_0h	WT_0h
AT3G03340	LUC7 related protein;(source:Araport11)	LUC7A,UNE6	ES	AT3G03340_P3	AT3G03340_ID1	gun1_0h	WT_0h
AT3G03340	LUC7 related protein;(source:Araport11)	LUC7A,UNE6	IR	AT3G03340_P3	AT3G03340_ID1	gun1_0h	WT_0h
AT3G03630	Encodes a protein that possesses S-sulfocysteine synthase activity and lacks O-acetylserien(thiol)lyase activity.	CS26	IR	AT3G03630_ID4	AT3G03630_P1	gun1_0h	WT_0h
AT3G04350	vacuolar sorting-associated protein (DUF946);(source:Araport11)	NA	ES	AT3G04350_P2	AT3G04350_P1	gun1_0h	WT_0h
AT3G04350	vacuolar sorting-associated protein (DUF946);(source:Araport11)	NA	IR	AT3G04350_P2	AT3G04350_P1	gun1_0h	WT_0h
AT3G04460	RING finger protein involved in peroxisome biogenesis. Also involved in peroxisomal import of nitric oxide synthase. Has been demonstrated to have E3 ubiquitin ligase activity.	APM4,ATPEX12,PEX12	A5	AT3G04460_P1	AT3G04460_ID2	gun1_0h	WT_0h
AT3G04840	Ribosomal protein S3Ae;(source:Araport11)	NA	A3	AT3G04840_P1	AT3G04840_ID4	gun1_0h	WT_0h
AT3G05160	Major facilitator superfamily protein;(source:Araport11)	NA	IR	AT3G05160_P1	AT3G05160.2	gun1_0h	WT_0h
AT3G05160	Major facilitator superfamily protein;(source:Araport11)	NA	A3	AT3G05160_P1	AT3G05160_c1	gun1_0h	WT_0h
AT3G05160	Major facilitator superfamily protein;(source:Araport11)	NA	ES	AT3G05160_P1	AT3G05160_c1	gun1_0h	WT_0h
AT3G05160	Major facilitator superfamily protein;(source:Araport11)	NA	A3	AT3G05160_P1	AT3G05160_ID90	gun1_0h	WT_0h
AT3G05160	Major facilitator superfamily protein;(source:Araport11)	NA	IR	AT3G05160_P1	AT3G05160_ID90	gun1_0h	WT_0h
AT3G05180	GDSL-motif esterase/acyltransferase/lipase. Enzyme group with broad substrate specificity that may catalyze acyltransfer or hydrolase reactions with lipid and non-lipid substrates.	NA	IR	AT3G05180_ID1	AT3G05180_P1	gun1_0h	WT_0h
AT3G05870	Subunit of the anaphase promoting complex, a ubiquitin ligase complex that regulates progression through the cell cycle.	APC11,ZGY1	A3	AT3G05870_P5	AT3G05870_P3	gun1_0h	WT_0h
AT3G05870	Subunit of the anaphase promoting complex, a ubiquitin ligase complex that regulates progression through the cell cycle.	APC11,ZGY1	A5	AT3G05870.1	AT3G05870_P3	gun1_0h	WT_0h
AT3G05870	Subunit of the anaphase promoting complex, a ubiquitin ligase complex that regulates progression through the cell cycle.	APC11,ZGY1	IR	AT3G05870_P5	AT3G05870_P3	gun1_0h	WT_0h
AT3G05870	Subunit of the anaphase promoting complex, a ubiquitin ligase complex that regulates progression through the cell cycle.	APC11,ZGY1	IR	AT3G05870.1	AT3G05870_P3	gun1_0h	WT_0h
AT3G05910	Pectinacetylesterase family protein;(source:Araport11)	AtPAE12	ES	AT3G05910_P1	AT3G05910_ID2	gun1_0h	WT_0h
AT3G06500	Encodes an alkaline/neutral invertase which localizes in mitochondria. It may be modulating hormone balance in relation to the radicle emergence. Mutants display severely reduced shoot growth and reduced oxygen consumption. Mutant root development is not affected as reported for A/N-InvA mutant (inva) plants. The mRNA is cell-to-cell mobile.	A/N-InvC	IR	AT3G06500_s1	AT3G06500_ID6	gun1_0h	WT_0h
AT3G06860	Encodes a multifunctional protein. Involved in peroxisomal fatty acid beta oxidation. Loss-of-function mutant lacks hydroxyacyl-CoA dehydrogenase activity and have reduced levels of long-chain enoyl-CoA hydratase activity. The mutant has fewer but larger peroxisomes. The mRNA is cell-to-cell mobile.	ATMFP2,MFP2	A3	AT3G06860_P1	AT3G06860_ID8	gun1_0h	WT_0h
AT3G06860	Encodes a multifunctional protein. Involved in peroxisomal fatty acid beta oxidation. Loss-of-function mutant lacks hydroxyacyl-CoA dehydrogenase activity and have reduced levels of long-chain enoyl-CoA hydratase activity. The mutant has fewer but larger peroxisomes. The mRNA is cell-to-cell mobile.	ATMFP2,MFP2	ES	AT3G06860_P1	AT3G06860_ID8	gun1_0h	WT_0h
AT3G07215	other_RNA;(source:Araport11)	NA	IR	AT3G07215_c1	AT3G07215.4	gun1_0h	WT_0h
AT3G07750	3-5-exoribonuclease family protein;(source:Araport11)	RRP42	A3	AT3G07750_P1	AT3G07750_ID6	gun1_0h	WT_0h
AT3G08510	Phosphoinositide-specific phospholipase C (PI-PLC), catalyzes hydrolysis of phosphatidylinositol 4,5-bisphosphate into inositol 1,4,5-trisphosphate and diacylglycerol. It is involved in auxin biosynthesis and signaling, modulating development of both male and female gametophytes. It also regulates MAMP-triggered immunity by modulating ROS production.	ATPLC2,PLC2	A3	AT3G08510_P1	AT3G08510_ID1	gun1_0h	WT_0h
AT3G08510	Phosphoinositide-specific phospholipase C (PI-PLC), catalyzes hydrolysis of phosphatidylinositol 4,5-bisphosphate into inositol 1,4,5-trisphosphate and diacylglycerol. It is involved in auxin biosynthesis and signaling, modulating development of both male and female gametophytes. It also regulates MAMP-triggered immunity by modulating ROS production.	ATPLC2,PLC2	A5	AT3G08510_P1	AT3G08510_ID1	gun1_0h	WT_0h
AT3G08510	Phosphoinositide-specific phospholipase C (PI-PLC), catalyzes hydrolysis of phosphatidylinositol 4,5-bisphosphate into inositol 1,4,5-trisphosphate and diacylglycerol. It is involved in auxin biosynthesis and signaling, modulating development of both male and female gametophytes. It also regulates MAMP-triggered immunity by modulating ROS production.	ATPLC2,PLC2	ES	AT3G08510_P1	AT3G08510_ID1	gun1_0h	WT_0h
AT3G08960	Ran effector.	NA	A3	AT3G08960.1	AT3G08960_c5	gun1_0h	WT_0h
AT3G08960	Ran effector.	NA	IR	AT3G08960.1	AT3G08960_c5	gun1_0h	WT_0h
AT3G09100	mRNA capping enzyme family protein;(source:Araport11)	NA	IR	AT3G09100_P2	AT3G09100_P1	gun1_0h	WT_0h
AT3G09200	Ribosomal protein L10 family protein;(source:Araport11)	NA	IR	AT3G09200.1	AT3G09200.2	gun1_0h	WT_0h
AT3G11220	A subunit of Elongator, a histone acetyl transferase complex, consisting of six subunits (ELP1?ELP6), that copurifies with the elongating RNAPII in yeast and humans. Three Arabidopsis thaliana genes, encoding homologs of the yeast Elongator subunits ELP1, ELP3 (histone acetyl transferase), and ELP4 are responsible for the narrow leaf phenotype in elongata mutants and for reduced root growth that …	AtELP4,ELO1	IR	AT3G11220_ID4	AT3G11220_P1	gun1_0h	WT_0h
AT3G11590	golgin family A protein;(source:Araport11)	NA	IR	AT3G11590_P1	AT3G11590_s2	gun1_0h	WT_0h
AT3G11590	golgin family A protein;(source:Araport11)	NA	IR	AT3G11590_s1	AT3G11590_s2	gun1_0h	WT_0h
AT3G12200	Encodes AtNek7, a member of the NIMA-related serine/threonine kinases (Neks) that have been linked to cell-cycle regulation in fungi and mammals. Plant Neks might be involved in plant development processes.	AtNek7,Nek7	ES	AT3G12200_P3	AT3G12200.2	gun1_0h	WT_0h
AT3G12200	Encodes AtNek7, a member of the NIMA-related serine/threonine kinases (Neks) that have been linked to cell-cycle regulation in fungi and mammals. Plant Neks might be involved in plant development processes.	AtNek7,Nek7	IR	AT3G12200_P3	AT3G12200.2	gun1_0h	WT_0h
AT3G12200	Encodes AtNek7, a member of the NIMA-related serine/threonine kinases (Neks) that have been linked to cell-cycle regulation in fungi and mammals. Plant Neks might be involved in plant development processes.	AtNek7,Nek7	IR	AT3G12200_P3	AT3G12200_P1	gun1_0h	WT_0h
AT3G12203	serine carboxypeptidase-like 17;(source:Araport11)	scpl17	A5	AT3G12203_P2	AT3G12203_P1	gun1_0h	WT_0h
AT3G12203	serine carboxypeptidase-like 17;(source:Araport11)	scpl17	IR	AT3G12203_P3	AT3G12203_P1	gun1_0h	WT_0h
AT3G12203	serine carboxypeptidase-like 17;(source:Araport11)	scpl17	IR	AT3G12203_P2	AT3G12203_P1	gun1_0h	WT_0h
AT3G12550	Belongs to a subgroup of SGS3-like proteins that act redundantly in RNA-directed DNA methylation: AT1G15910 (FDM1), AT4G00380 (FDM2), AT3G12550 (FDM3), AT1G13790 (FDM4), AT1G80790 (FDM5).	FDM3	A5	AT3G12550_JC15	AT3G12550_JS13	gun1_0h	WT_0h
AT3G12550	Belongs to a subgroup of SGS3-like proteins that act redundantly in RNA-directed DNA methylation: AT1G15910 (FDM1), AT4G00380 (FDM2), AT3G12550 (FDM3), AT1G13790 (FDM4), AT1G80790 (FDM5).	FDM3	IR	AT3G12550_JC15	AT3G12550_JS13	gun1_0h	WT_0h
AT3G12560	Encodes a telomeric DNA-binding protein.	ATTBP2,TRFL9	A3	AT3G12560_P1	AT3G12560_JS3	gun1_0h	WT_0h
AT3G12560	Encodes a telomeric DNA-binding protein.	ATTBP2,TRFL9	A5	AT3G12560_P1	AT3G12560_JS3	gun1_0h	WT_0h
AT3G12560	Encodes a telomeric DNA-binding protein.	ATTBP2,TRFL9	IR	AT3G12560_P1	AT3G12560_JS3	gun1_0h	WT_0h
AT3G13000	ubiquinone biosynthesis protein (Protein of unknown function, DUF547);(source:Araport11)	NA	IR	AT3G13000_P3	AT3G13000_ID1	gun1_0h	WT_0h
AT3G13340	Transducin/WD40 repeat-like superfamily protein;(source:Araport11)	NA	A5	AT3G13340_P3	AT3G13340_P2	gun1_0h	WT_0h
AT3G13340	Transducin/WD40 repeat-like superfamily protein;(source:Araport11)	NA	IR	AT3G13340_P3	AT3G13340_P2	gun1_0h	WT_0h
AT3G13510	carboxyl-terminal peptidase, putative (DUF239);(source:Araport11)	NA	A5	AT3G13510_P1	AT3G13510_ID12	gun1_0h	WT_0h
AT3G14590	Ca2+-dependent lipid-binding protein	NTMC2T6.2,NTMC2TYPE6.2	IR	AT3G14590_P2	AT3G14590_ID3	gun1_0h	WT_0h
AT3G15190	chloroplast 30S ribosomal protein S20;(source:Araport11)	PRPS20	A3	AT3G15190_P1	AT3G15190_ID1	gun1_0h	WT_0h
AT3G15190	chloroplast 30S ribosomal protein S20;(source:Araport11)	PRPS20	A5	AT3G15190_P1	AT3G15190_ID1	gun1_0h	WT_0h
AT3G15240	Serine/threonine-protein kinase WNK (With No Lysine)-like protein;(source:Araport11)	NA	A5	AT3G15240_c1	AT3G15240_P2	gun1_0h	WT_0h
AT3G15680	Ran BP2/NZF zinc finger-like superfamily protein;(source:Araport11)	NA	A5	AT3G15680_P2	AT3G15680_P1	gun1_0h	WT_0h
AT3G15950	Similar to TSK-associating protein 1 (TSA1), contains 10 EFE repeats, a novel repeat sequence unique to plants. Expressed preferentially in the roots.Protein is localized to ER bodies- an endoplasmic reticulum derived structure. Loss of function mutations lack ER bodies.	NAI2	MES	AT3G15950_P1	AT3G15950_ID510	gun1_0h	WT_0h
AT3G15980	Coatomer, beta subunit;(source:Araport11)	NA	A3	AT3G15980_P6	AT3G15980.1	gun1_0h	WT_0h
AT3G16230	Putative eukaryotic LigT;(source:Araport11)	NA	A3	AT3G16230_ID12	AT3G16230_P1	gun1_0h	WT_0h
AT3G16230	Putative eukaryotic LigT;(source:Araport11)	NA	A3	AT3G16230_P2	AT3G16230_P1	gun1_0h	WT_0h
AT3G16230	Putative eukaryotic LigT;(source:Araport11)	NA	ES	AT3G16230.3	AT3G16230_P1	gun1_0h	WT_0h
AT3G16230	Putative eukaryotic LigT;(source:Araport11)	NA	IR	AT3G16230_P4	AT3G16230_P1	gun1_0h	WT_0h
AT3G16230	Putative eukaryotic LigT;(source:Araport11)	NA	IR	AT3G16230_ID12	AT3G16230_P1	gun1_0h	WT_0h
AT3G16400	Encodes a nitrile-specifier protein NSP1 responsible for constitutive and herbivore-induced simple nitrile formation in rosette leaves. NSP1 is one out of five (At3g16400/NSP1, At2g33070/NSP2, At3g16390/NSP3, At3g16410/NSP4 and At5g48180/NSP5) A. thaliana epithiospecifier protein (ESP) homologues that promote simple nitrile, but not epithionitrile or thiocyanate formation. The mRNA is cell-to-cel…	ATMLP-470,ATNSP1,NSP1	IR	AT3G16400.2	AT3G16400_P1	gun1_0h	WT_0h
AT3G17470	CRSH-dependent ppGpp synthesis causes transient increase of intracellular ppGpp at night.	ATCRSH,CRSH	A3	AT3G17470_P2	AT3G17470_JC7	gun1_0h	WT_0h
AT3G17630	member of Putative Na+/H+ antiporter family	ATCHX19,CHX19	IR	AT3G17630_P1	AT3G17630_P2	gun1_0h	WT_0h
AT3G17970	Integral chloroplast outer membrane protein. Belongs to one of the 36 carboxylate clamp (CC)-tetratricopeptide repeat (TPR) proteins (Prasad 2010, Pubmed ID: 20856808) with potential to interact with Hsp90/Hsp70 as co-chaperones.	atToc64-III,TOC64-III	A5	AT3G17970.1	AT3G17970_s1	gun1_0h	WT_0h
AT3G18930	RING/U-box superfamily protein;(source:Araport11)	NA	A3	AT3G18930.2	AT3G18930_P1	gun1_0h	WT_0h
AT3G18930	RING/U-box superfamily protein;(source:Araport11)	NA	ATSS	AT3G18930.2	AT3G18930_P1	gun1_0h	WT_0h
AT3G18930	RING/U-box superfamily protein;(source:Araport11)	NA	IR	AT3G18930.2	AT3G18930_P1	gun1_0h	WT_0h
AT3G18990	Required for vernalization. Essential for the complete repression of FLC in vernalized plants. Required for the methylation of histone H3	REM39,VRN1	IR	AT3G18990_P1	AT3G18990_P2	gun1_0h	WT_0h
AT3G19540	glutamyl-tRNA (Gln) amidotransferase subunit A (DUF620);(source:Araport11)	BDR4	A5	AT3G19540_P1	AT3G19540_c1	gun1_0h	WT_0h
AT3G19650	cyclin-like protein;(source:Araport11)	NA	IR	AT3G19650_c1	AT3G19650_JS5	gun1_0h	WT_0h
AT3G19910	RING/U-box superfamily protein;(source:Araport11)	NA	A3	AT3G19910_P1	AT3G19910_ID6	gun1_0h	WT_0h
AT3G20270	Encodes one of the two LBP/BPI related proteins (AT1G04970/LBR-1, AT3G20270/LBR-2) that bind to LPS directly and regulate PR1 expression.	LBR-2	IR	AT3G20270_JC10	AT3G20270_c5	gun1_0h	WT_0h
AT3G20270	Encodes one of the two LBP/BPI related proteins (AT1G04970/LBR-1, AT3G20270/LBR-2) that bind to LPS directly and regulate PR1 expression.	LBR-2	IR	AT3G20270_JC10	AT3G20270_P6	gun1_0h	WT_0h
AT3G20420	double-stranded RNA binding / ribonuclease III. Required for 3' external transcribed spacer (ETS) cleavage of the pre-rRNA in vivo. Localizes in the nucleus and cytoplasm.	ATRTL2,RTL2	A3	AT3G20420_P1	AT3G20420_ID3	gun1_0h	WT_0h
AT3G20470	encodes a glycine-rich protein that is expressed more abundantly in immature seed pods than in stems and leaves. Expression is not detected in roots or flowers.	ATGRP-5,ATGRP5,GRP-5,GRP5	A3	AT3G20470_c2	AT3G20470_ID1	gun1_0h	WT_0h
AT3G20470	encodes a glycine-rich protein that is expressed more abundantly in immature seed pods than in stems and leaves. Expression is not detected in roots or flowers.	ATGRP-5,ATGRP5,GRP-5,GRP5	A5	AT3G20470_c2	AT3G20470_ID1	gun1_0h	WT_0h
AT3G20780	Encodes putative eukaryotic homolog of archaebacterial topoisomerase VI subunit B, TOP6B. Is essential for endoreduplication and is involved in cell expansion and cell proliferation. The hlq (harlequin) dwarf mutant has fewer root hair and leaf trichome. It has abnormal epidermal cell and accumulates callose.	ATTOP6B,BIN3,HLQ,HYP6,RHL3,TOP6B	A3	AT3G20780_s1	AT3G20780_JC2	gun1_0h	WT_0h
AT3G20780	Encodes putative eukaryotic homolog of archaebacterial topoisomerase VI subunit B, TOP6B. Is essential for endoreduplication and is involved in cell expansion and cell proliferation. The hlq (harlequin) dwarf mutant has fewer root hair and leaf trichome. It has abnormal epidermal cell and accumulates callose.	ATTOP6B,BIN3,HLQ,HYP6,RHL3,TOP6B	A5	AT3G20780_s1	AT3G20780_JC2	gun1_0h	WT_0h
AT3G21160	Encodes an alpha-mannosidase I enzyme responsible for N-glycan maturation.	MANIA,MNS2	IR	AT3G21160_P1	AT3G21160_P2	gun1_0h	WT_0h
AT3G21175	member of a novel family of plant-specific GATA-type transcription factors.	GATA24,TIFY2B,ZML1,ZML1	IR	AT3G21175_s1	AT3G21175.1	gun1_0h	WT_0h
AT3G22120	Cell wall-plasma membrane linker protein homolog (CWLP)	CWLP	A3	AT3G22120_ID4	AT3G22120_ID1	gun1_0h	WT_0h
AT3G22230	Ribosomal L27e protein family;(source:Araport11)	NA	IR	AT3G22230_c1	AT3G22230_P1	gun1_0h	WT_0h
AT3G22420	Encodes a member of the WNK family (9 members in all) of protein kinases, the structural design of which is clearly distinct from those of other known protein kinases, such as receptor-like kinases and mitogen-activated protein kinases. Its transcription is under the control of circadian rhythms.	ATWNK2,WNK2,ZIK3	IR	AT3G22420_P4	AT3G22420_P3	gun1_0h	WT_0h
AT3G22950	A member of ARF GTPase family. A thaliana has 21 members of this family, known to be essential for vesicle coating and uncoating and functions in GTP-binding. Gene encoding ADP-ribosylation factor and similar to ADP-ribosylation factor GB:P91924 (Dugesia japonica), other ARFs and ARF-like proteins.	ARFC1,ATARFC1	A3	AT3G22950.1	AT3G22950_JC3	gun1_0h	WT_0h
AT3G23255	tRNA dimethylallyltransferase;(source:Araport11)	NA	MES	AT3G23255.2	AT3G23255_ID19	gun1_0h	WT_0h
AT3G23990	mitochondrial chaperonin HSP. assist in rapid assembly of the oligomeric protein structures in the mitochondria.	HSP60,HSP60-3B	A5	AT3G23990_P1	AT3G23990_ID2	gun1_0h	WT_0h
AT3G23990	mitochondrial chaperonin HSP. assist in rapid assembly of the oligomeric protein structures in the mitochondria.	HSP60,HSP60-3B	MES	AT3G23990_P1	AT3G23990_ID2	gun1_0h	WT_0h
AT3G24570	contributes to osmotic stress tolerance	NA	A5	AT3G24570_P1	AT3G24570_s2	gun1_0h	WT_0h
AT3G25290	Auxin-responsive family protein;(source:Araport11)	NA	IR	AT3G25290.2	AT3G25290_P1	gun1_0h	WT_0h
AT3G25740	Encodes a plastid localized methionine aminopeptidase. Formerly called MAP1C, now called MAP1B.	MAP1B,MAP1C	A3	AT3G25740_ID5	AT3G25740_ID31	gun1_0h	WT_0h
AT3G25740	Encodes a plastid localized methionine aminopeptidase. Formerly called MAP1C, now called MAP1B.	MAP1B,MAP1C	A5	AT3G25740_ID5	AT3G25740_ID31	gun1_0h	WT_0h
AT3G26240	Cysteine/Histidine-rich C1 domain family protein. Accumulation of this protein is regulated by a cis-Natural Antisense RNA (cis-NAT).	NA	IR	AT3G26240_P1	AT3G26240_s1	gun1_0h	WT_0h
AT3G26720	Glycosyl hydrolase family 38 protein;(source:Araport11)	NA	A3	AT3G26720_P1	AT3G26720.2	gun1_0h	WT_0h
AT3G26744	Encodes a MYC-like bHLH transcriptional activator that binds specifically to the MYC recognition sequences in the CBF3 promoter. It also binds to and inhibits the expression of ABI3. Mutants are defective in cold-regulated gene expression and ABA signaling druing seed germination.. Cold stress triggers protein degradation of nuclear GFPICE1 protein, and the RING finger protein HOS1 is required. S…	ATICE1,ICE1,SCRM	IR	AT3G26744_P1	AT3G26744_P2	gun1_0h	WT_0h
AT3G27090	DCD (Development and Cell Death) domain protein;(source:Araport11)	NA	IR	AT3G27090_P3	AT3G27090_P1	gun1_0h	WT_0h
AT3G27210	hypothetical protein;(source:Araport11)	NA	A5	AT3G27210_P1	AT3G27210_s1	gun1_0h	WT_0h
AT3G27330	zinc finger (C3HC4-type RING finger) family protein;(source:Araport11)	NA	ES	AT3G27330_P1	AT3G27330_s1	gun1_0h	WT_0h
AT3G27870	ATPase E1-E2 type family protein / haloacid dehalogenase-like hydrolase family protein;(source:Araport11)	NA	IR	AT3G27870_P1	AT3G27870_P3	gun1_0h	WT_0h
AT3G27925	Encodes a DegP protease; nuclear gene encoding chloroplast-targeted protease that can degrade two lumenal proteins, plastocyanin and OE33, suggesting a role as a general-purpose protease in the thylakoid lumen. Involved in the degradation of D1 protein of PS II, hence participating in the repair of PS II damages caused by photoinhibition. The mRNA is cell-to-cell mobile.	DEG1,DEGP1	IR	AT3G27925_P1	AT3G27925_P2	gun1_0h	WT_0h
AT3G28130	nodulin MtN21-like transporter family protein	UMAMIT44	A3	AT3G28130_P5	AT3G28130_P4	gun1_0h	WT_0h
AT3G28130	nodulin MtN21-like transporter family protein	UMAMIT44	A5	AT3G28130_P5	AT3G28130_P4	gun1_0h	WT_0h
AT3G28130	nodulin MtN21-like transporter family protein	UMAMIT44	IR	AT3G28130_P5	AT3G28130_P4	gun1_0h	WT_0h
AT3G29100	Encodes a member of the Arabidopsis v-SNARE (vesicle soluble NSF attachment protein receptor) family that has 3 members: VTI11, VTI12, and VTI13. This gene is not expressed at levels detectable by RT-PCR. However, one EST corresponding to this gene has been isolated.	ATVTI13,VTI13	IR	AT3G29100_ID4	AT3G29100_P1	gun1_0h	WT_0h
AT3G29100	Encodes a member of the Arabidopsis v-SNARE (vesicle soluble NSF attachment protein receptor) family that has 3 members: VTI11, VTI12, and VTI13. This gene is not expressed at levels detectable by RT-PCR. However, one EST corresponding to this gene has been isolated.	ATVTI13,VTI13	IR	AT3G29100_ID4	AT3G29100_P4	gun1_0h	WT_0h
AT3G29130	kxDL motif protein;(source:Araport11)	NA	A3	AT3G29130_P4	AT3G29130_P3	gun1_0h	WT_0h
AT3G29130	kxDL motif protein;(source:Araport11)	NA	IR	AT3G29130_P4	AT3G29130_P3	gun1_0h	WT_0h
AT3G29760	Haloacid dehalogenase-like hydrolase (HAD) superfamily protein;(source:Araport11)	NA	A3	AT3G29760_s2	AT3G29760_s1	gun1_0h	WT_0h
AT3G30775	Encodes a proline oxidase that is predicted to localize to the inner mitochondrial membrane, its mRNA expression induced by high levels of Al and by osmotic stress. The promoter contains an L-proline-inducible element.	AT-POX,ATPDH,ATPOX,ERD5,PDH1,PRO1,PRODH	IR	AT3G30775_P1	AT3G30775_P2	gun1_0h	WT_0h
AT3G33530	Transducin family protein / WD-40 repeat family protein;(source:Araport11)	NA	IR	AT3G33530_P4	AT3G33530_P5	gun1_0h	WT_0h
AT3G43220	Phosphoinositide phosphatase family protein;(source:Araport11)	SAC3	A3	AT3G43220.2	AT3G43220_s1	gun1_0h	WT_0h
AT3G43220	Phosphoinositide phosphatase family protein;(source:Araport11)	SAC3	A5	AT3G43220.2	AT3G43220_s1	gun1_0h	WT_0h
AT3G46385	pseudogene of Leucine-rich repeat protein kinase family protein;(source:Araport11)	NA	IR	AT3G46385_ID1	AT3G46385_JC1	gun1_0h	WT_0h
AT3G46970	Encodes a cytosolic alpha-glucan phosphorylase. In vitro, the enzyme has a preference for branched polysaccharides, such as glycogen.	ATPHS2,PHS2	A3	AT3G46970.1	AT3G46970_c1	gun1_0h	WT_0h
AT3G46970	Encodes a cytosolic alpha-glucan phosphorylase. In vitro, the enzyme has a preference for branched polysaccharides, such as glycogen.	ATPHS2,PHS2	MES	AT3G46970.1	AT3G46970_c1	gun1_0h	WT_0h
AT3G47200	transmembrane protein, putative (DUF247);(source:Araport11)	NA	A3	AT3G47200_P2	AT3G47200_ID1	gun1_0h	WT_0h
AT3G47490	HNH endonuclease;(source:Araport11)	NA	IR	AT3G47490_P4	AT3G47490_P6	gun1_0h	WT_0h
AT3G48115	other_RNA;(source:Araport11)	NA	IR	AT3G48115.1	AT3G48115_ID1	gun1_0h	WT_0h
AT3G48360	Encodes a protein (BT2) that is an essential component of the TAC1-mediated telomerase activation pathway. Acts redundantly with BT3 and BT1 during female gametophyte development and with BT3 during male gametophyte development. BT2 also mediates multiple responses to nutrients, stresses, and hormones.	ATBT2,BT2	IR	AT3G48360_P1	AT3G48360_c1	gun1_0h	WT_0h
AT3G48780	Encodes one of the two LCB2 subunits (LCB2a and LCB2b) of serine palmitoyltransferase, an enzyme involved in sphingolipid biosynthesis. LCB2a and LCB2b are functional redundant. Double mutants are gametophytic lethal. The mRNA is cell-to-cell mobile.	ATSPT1,SPT1	A5	AT3G48780_P1	AT3G48780_c2	gun1_0h	WT_0h
AT3G49260	IQ-domain 21;(source:Araport11)	iqd21	IR	AT3G49260_P1	AT3G49260_JS6	gun1_0h	WT_0h
AT3G50370	hypothetical protein;(source:Araport11)	NA	IR	AT3G50370_P2	AT3G50370.1	gun1_0h	WT_0h
AT3G51040	Encodes a protein of 231 amino acids with 51% identity to RTE1 over 209 amino acids. Interacts with RTE1 in planta and appears to function in same pathway to positively regulate ethylene signaling.	RTH	ES	AT3G51040_P1	AT3G51040_P2	gun1_0h	WT_0h
AT3G51040	Encodes a protein of 231 amino acids with 51% identity to RTE1 over 209 amino acids. Interacts with RTE1 in planta and appears to function in same pathway to positively regulate ethylene signaling.	RTH	IR	AT3G51040_P1	AT3G51040_P2	gun1_0h	WT_0h
AT3G51100	altered inheritance of mitochondria protein;(source:Araport11)	NA	A3	AT3G51100_P1	AT3G51100.3	gun1_0h	WT_0h
AT3G51100	altered inheritance of mitochondria protein;(source:Araport11)	NA	IR	AT3G51100_P1	AT3G51100_P2	gun1_0h	WT_0h
AT3G51840	Encodes a short-chain acyl-CoA oxidase, which catalyzes the first step of peroxisomal fatty acid beta-oxidation during early, post-germinative growth in oilseed species. Null mutants virtually lack short-chain acyl-CoA and are resistant to 2,4-dichlorophenoxybutyric acid, which is converted to the herbicide and auxin analogue 2,4-dichlorophenoxyacetic acid by beta-oxidation. Despite the almost co…	ACX4,ATG6,ATSCX	IR	AT3G51840_P1	AT3G51840_s2	gun1_0h	WT_0h
AT3G51850	member of Calcium Dependent Protein Kinase The mRNA is cell-to-cell mobile.	CPK13	IR	AT3G51850_P1	AT3G51850_ID2	gun1_0h	WT_0h
AT3G51950	Contains single CCCH domain.	NA	A3	AT3G51950_ID1	AT3G51950_P1	gun1_0h	WT_0h
AT3G51950	Contains single CCCH domain.	NA	A3	AT3G51950_ID6	AT3G51950_P1	gun1_0h	WT_0h
AT3G51950	Contains single CCCH domain.	NA	IR	AT3G51950_ID1	AT3G51950_P1	gun1_0h	WT_0h
AT3G51950	Contains single CCCH domain.	NA	IR	AT3G51950_ID6	AT3G51950_P1	gun1_0h	WT_0h
AT3G52072	Natural antisense transcript overlaps with AT3G52070;(source:Araport11)	NA	IR	AT3G52072_ID15	AT3G52072_ID12	gun1_0h	WT_0h
AT3G52072	Natural antisense transcript overlaps with AT3G52070;(source:Araport11)	NA	ES	AT3G52072_ID15	AT3G52072_ID6	gun1_0h	WT_0h
AT3G52072	Natural antisense transcript overlaps with AT3G52070;(source:Araport11)	NA	IR	AT3G52072_ID15	AT3G52072_ID6	gun1_0h	WT_0h
AT3G52180	Encodes a plant-specific glucan phosphatase that contains a noncatalytic carbohydrate-binding module as well as a dual specificity protein phosphatase domain. SEX4 can dephosphorylate C6- and C3-glucosyl residues on native starch grains and related maltodextrin compounds in vitro. This protein interacts with the plant SnRK AKIN11, binds starch, and is localized in the chloroplast. sex4 mutants ha…	ATPTPKIS1,ATSEX4,DSP4,SEX4	ES	AT3G52180_P4	AT3G52180_P2	gun1_0h	WT_0h
AT3G52180	Encodes a plant-specific glucan phosphatase that contains a noncatalytic carbohydrate-binding module as well as a dual specificity protein phosphatase domain. SEX4 can dephosphorylate C6- and C3-glucosyl residues on native starch grains and related maltodextrin compounds in vitro. This protein interacts with the plant SnRK AKIN11, binds starch, and is localized in the chloroplast. sex4 mutants ha…	ATPTPKIS1,ATSEX4,DSP4,SEX4	IR	AT3G52180_P4	AT3G52180_P2	gun1_0h	WT_0h
AT3G52180	Encodes a plant-specific glucan phosphatase that contains a noncatalytic carbohydrate-binding module as well as a dual specificity protein phosphatase domain. SEX4 can dephosphorylate C6- and C3-glucosyl residues on native starch grains and related maltodextrin compounds in vitro. This protein interacts with the plant SnRK AKIN11, binds starch, and is localized in the chloroplast. sex4 mutants ha…	ATPTPKIS1,ATSEX4,DSP4,SEX4	A3	AT3G52180_P4	AT3G52180_s1	gun1_0h	WT_0h
AT3G52180	Encodes a plant-specific glucan phosphatase that contains a noncatalytic carbohydrate-binding module as well as a dual specificity protein phosphatase domain. SEX4 can dephosphorylate C6- and C3-glucosyl residues on native starch grains and related maltodextrin compounds in vitro. This protein interacts with the plant SnRK AKIN11, binds starch, and is localized in the chloroplast. sex4 mutants ha…	ATPTPKIS1,ATSEX4,DSP4,SEX4	ES	AT3G52180_P4	AT3G52180_s1	gun1_0h	WT_0h
AT3G52180	Encodes a plant-specific glucan phosphatase that contains a noncatalytic carbohydrate-binding module as well as a dual specificity protein phosphatase domain. SEX4 can dephosphorylate C6- and C3-glucosyl residues on native starch grains and related maltodextrin compounds in vitro. This protein interacts with the plant SnRK AKIN11, binds starch, and is localized in the chloroplast. sex4 mutants ha…	ATPTPKIS1,ATSEX4,DSP4,SEX4	IR	AT3G52180_P4	AT3G52180_s1	gun1_0h	WT_0h
AT3G52730	ubiquinol-cytochrome C reductase UQCRX/QCR9-like family protein;(source:Araport11)	NA	A5	AT3G52730_P1	AT3G52730_P2	gun1_0h	WT_0h
AT3G52850	Encodes the Vacuolar Sorting Receptor-1 (VSR-1)/Epidermal Growth Factor Receptor-like protein1(VSR-1/ATELP1). Binds vacuolar targeting signals. Involved in sorting seed storage proteins into vacuoles. The mRNA is cell-to-cell mobile.	ATELP,ATELP1,ATVSR1,BP-80,BP80,BP80-11,BP80B,GFS1,VSR1,VSR11	IR	AT3G52850_P1	AT3G52850_JC1	gun1_0h	WT_0h
AT3G53750	Member of the Actin gene family. Expressed in mature pollen.	ACT3	IR	AT3G53750_P1	AT3G53750_JC2	gun1_0h	WT_0h
AT3G54500	Member of a small family (4 proteins) in Arabidopsis that have some overlap in function. LNK2 along with LNK1 functions in the integration of light signaling and circadian clock. It is regulated by the clock TOC1 complex. Functions as a transcriptional coactivator.	LNK2	A3	AT3G54500_ID129	AT3G54500.1	gun1_0h	WT_0h
AT3G54500	Member of a small family (4 proteins) in Arabidopsis that have some overlap in function. LNK2 along with LNK1 functions in the integration of light signaling and circadian clock. It is regulated by the clock TOC1 complex. Functions as a transcriptional coactivator.	LNK2	IR	AT3G54500_ID129	AT3G54500_ID130	gun1_0h	WT_0h
AT3G54740	zein-binding protein (Protein of unknown function, DUF593);(source:Araport11)	NA	IR	AT3G54740_P6	AT3G54740_P5	gun1_0h	WT_0h
AT3G54930	Protein phosphatase 2A regulatory B subunit family protein;(source:Araport11)	NA	IR	AT3G54930_P3	AT3G54930_P2	gun1_0h	WT_0h
AT3G55600	Membrane fusion protein Use1;(source:Araport11)	NA	IR	AT3G55600_P2	AT3G55600_P1	gun1_0h	WT_0h
AT3G55630	Encodes one of the three folylpolyglutamate synthetase isoforms (FPGSs): FPGS1 (At5g05980, plastidic), FPGS2 (At3g10160, mitochondrial) and FPGS3 (At3g55630, cytosolic).	ATDFD,DFD,FPGS3	A3	AT3G55630_P5	AT3G55630_ID114	gun1_0h	WT_0h
AT3G55630	Encodes one of the three folylpolyglutamate synthetase isoforms (FPGSs): FPGS1 (At5g05980, plastidic), FPGS2 (At3g10160, mitochondrial) and FPGS3 (At3g55630, cytosolic).	ATDFD,DFD,FPGS3	IR	AT3G55630_P5	AT3G55630_ID114	gun1_0h	WT_0h
AT3G56130	biotin/lipoyl attachment domain-containing protein;(source:Araport11)	BADC1,BLP3	IR	AT3G56130_P1	AT3G56130.2	gun1_0h	WT_0h
AT3G56680	Single-stranded nucleic acid binding R3H protein;(source:Araport11)	NA	A3	AT3G56680_P1	AT3G56680_ID2	gun1_0h	WT_0h
AT3G56680	Single-stranded nucleic acid binding R3H protein;(source:Araport11)	NA	A5	AT3G56680_P1	AT3G56680_ID2	gun1_0h	WT_0h
AT3G57040	response regulator ARR9, A two-component response regulator-like protein with a receiver domain with a conserved aspartate residue and a possible phosphorylation site and at the N-terminal half. Appears to interact with histidine kinase like genes ATHP3 and ATHP2	ARR9,ATRR4	IR	AT3G57040_P2	AT3G57040_ID5	gun1_0h	WT_0h
AT3G57550	guanylate kinase	AGK2,GK-2	IR	AT3G57550_P1	AT3G57550_ID24	gun1_0h	WT_0h
AT3G57780	nucleolar-like protein;(source:Araport11)	NA	A5	AT3G57780_P4	AT3G57780_P2	gun1_0h	WT_0h
AT3G57780	nucleolar-like protein;(source:Araport11)	NA	IR	AT3G57780_P4	AT3G57780_P5	gun1_0h	WT_0h
AT3G58610	ketol-acid reductoisomerase;(source:Araport11)	NA	IR	AT3G58610_P1	AT3G58610.3	gun1_0h	WT_0h
AT3G58610	ketol-acid reductoisomerase;(source:Araport11)	NA	IR	AT3G58610_ID7	AT3G58610_ID9	gun1_0h	WT_0h
AT3G58610	ketol-acid reductoisomerase;(source:Araport11)	NA	MES	AT3G58610_ID7	AT3G58610_ID9	gun1_0h	WT_0h
AT3G58610	ketol-acid reductoisomerase;(source:Araport11)	NA	MES	AT3G58610_P1	AT3G58610_ID9	gun1_0h	WT_0h
AT3G58790	Encodes a protein with putative galacturonosyltransferase activity.	GAUT15	IR	AT3G58790.1	AT3G58790_JC3	gun1_0h	WT_0h
AT3G58930	F-box/RNI-like superfamily protein;(source:Araport11)	NA	IR	AT3G58930_P5	AT3G58930_P3	gun1_0h	WT_0h
AT3G59210	F-box/RNI-like superfamily protein;(source:Araport11)	NA	A3	AT3G59210_P2	AT3G59210_c1	gun1_0h	WT_0h
AT3G59490	hypothetical protein;(source:Araport11)	NA	A3	AT3G59490.2	AT3G59490_ID1	gun1_0h	WT_0h
AT3G59490	hypothetical protein;(source:Araport11)	NA	IR	AT3G59490.2	AT3G59490_ID4	gun1_0h	WT_0h
AT3G59570	Ypt/Rab-GAP domain of gyp1p superfamily protein;(source:Araport11)	NA	IR	AT3G59570_P3	AT3G59570_P2	gun1_0h	WT_0h
AT3G59640	Plasma membrane localized. glycine rich protein of unknown function. Involved in non host resistance.	PSS1	A5	AT3G59640_P1	AT3G59640_P2	gun1_0h	WT_0h
AT3G59970	methylenetetrahydrofolate reductase MTHFR1 mRNA, complete	MTHFR1	A3	AT3G59970_P3	AT3G59970.2	gun1_0h	WT_0h
AT3G59970	methylenetetrahydrofolate reductase MTHFR1 mRNA, complete	MTHFR1	ES	AT3G59970_P3	AT3G59970.2	gun1_0h	WT_0h
AT3G60070	Major facilitator superfamily protein;(source:Araport11)	NA	A5	AT3G60070_c2	AT3G60070_P1	gun1_0h	WT_0h
AT3G60965	transposable_element_gene;(source:Araport11);copia-like retrotransposon family, has a 8.8e-146 P-value blast match to dbj|BAA78425.1| polyprotein (Arabidopsis thaliana) (AtRE1) (Ty1_Copia-element);(source:TAIR10)	NA	A3	AT3G60965.1	AT3G60965_JC3	gun1_0h	WT_0h
AT3G60965	transposable_element_gene;(source:Araport11);copia-like retrotransposon family, has a 8.8e-146 P-value blast match to dbj|BAA78425.1| polyprotein (Arabidopsis thaliana) (AtRE1) (Ty1_Copia-element);(source:TAIR10)	NA	IR	AT3G60965.1	AT3G60965_JC3	gun1_0h	WT_0h
AT3G61060	phloem protein 2-A13;(source:Araport11)	AtPP2-A13,PP2-A13	A5	AT3G61060_P1	AT3G61060_s1	gun1_0h	WT_0h
AT3G61060	phloem protein 2-A13;(source:Araport11)	AtPP2-A13,PP2-A13	IR	AT3G61060_P1	AT3G61060_s1	gun1_0h	WT_0h
AT3G61710	Encodes autophagy protein 6 (ATG6), required for pollen germination and plant development.	ATATG6,AtBECLIN1,ATG6,BECLIN1	IR	AT3G61710_P1	AT3G61710_P4	gun1_0h	WT_0h
AT3G62120	Encodes a cytosolic prolyl-tRNA synthetase.	AtProRS-Cyt,ProRS-Cyt	A5	AT3G62120.1	AT3G62120_ID7	gun1_0h	WT_0h
AT3G62330	Zinc knuckle (CCHC-type) family protein;(source:Araport11)	NA	IR	AT3G62330_P1	AT3G62330_JS1	gun1_0h	WT_0h
AT3G62330	Zinc knuckle (CCHC-type) family protein;(source:Araport11)	NA	IR	AT3G62330_P1	AT3G62330_JS7	gun1_0h	WT_0h
AT3G62620	Encodes a protein of unknown function. Previously this protein has been annotated computationally as a sucrose-phosphatase-related protein. However, the source of this annotation can not be verified. This annotation (sucrose-phosphatase-related) has been removed.	NA	A5	AT3G62620_P5	AT3G62620_ID1	gun1_0h	WT_0h
AT3G62620	Encodes a protein of unknown function. Previously this protein has been annotated computationally as a sucrose-phosphatase-related protein. However, the source of this annotation can not be verified. This annotation (sucrose-phosphatase-related) has been removed.	NA	IR	AT3G62620_P5	AT3G62620_ID1	gun1_0h	WT_0h
AT3G62750	Encodes a putative beta glucosidase, expressed in the peroxisome.	BGLU8	A3	AT3G62750_JC15	AT3G62750_P6	gun1_0h	WT_0h
AT3G62750	Encodes a putative beta glucosidase, expressed in the peroxisome.	BGLU8	IR	AT3G62750_P2	AT3G62750_P6	gun1_0h	WT_0h
AT3G62750	Encodes a putative beta glucosidase, expressed in the peroxisome.	BGLU8	IR	AT3G62750_JC15	AT3G62750_P6	gun1_0h	WT_0h
AT3G63300	Encodes a pleckstrin homology domain- and DUF828-containing protein. Mutants have defects in leaf vascular pattering, with vascular bundles that fail to meet distally in both the cotyledons and leaves. Necessary to the formation of the closed leaf vascular pattern characteristic of dicot leaves in response to auxin. Redundant with FKD2. FKD1 may influence PIN1 localization in an auxin dependent m…	FKD1	A3	AT3G63300.1	AT3G63300_P2	gun1_0h	WT_0h
AT3G63300	Encodes a pleckstrin homology domain- and DUF828-containing protein. Mutants have defects in leaf vascular pattering, with vascular bundles that fail to meet distally in both the cotyledons and leaves. Necessary to the formation of the closed leaf vascular pattern characteristic of dicot leaves in response to auxin. Redundant with FKD2. FKD1 may influence PIN1 localization in an auxin dependent m…	FKD1	IR	AT3G63300.1	AT3G63300_P2	gun1_0h	WT_0h
AT3G63400	Cyclophilin-like peptidyl-prolyl cis-trans isomerase family protein;(source:Araport11)	NA	IR	AT3G63400.3	AT3G63400_P4	gun1_0h	WT_0h
AT4G01010	member of Cyclic nucleotide gated channel family	ATCNGC13,CNGC13	A5	AT4G01010_P1	AT4G01010_JC20	gun1_0h	WT_0h
AT4G01010	member of Cyclic nucleotide gated channel family	ATCNGC13,CNGC13	IR	AT4G01010_P1	AT4G01010_P2	gun1_0h	WT_0h
AT4G01460	basic helix-loop-helix (bHLH) DNA-binding superfamily protein;(source:Araport11)	NA	IR	AT4G01460_P1	AT4G01460_P2	gun1_0h	WT_0h
AT4G02075	RING/FYVE/PHD zinc finger superfamily protein;(source:Araport11)	PIT1	IR	AT4G02075_P3	AT4G02075_P1	gun1_0h	WT_0h
AT4G02075	RING/FYVE/PHD zinc finger superfamily protein;(source:Araport11)	PIT1	IR	AT4G02075_P3	AT4G02075_P2	gun1_0h	WT_0h
AT4G02430	Barta et al (2010) have proposed a nomenclature for Serine/Arginine-Rich Protein Splicing Factors (SR proteins): Plant Cell. 2010, 22:2926.	At-SR34b,SR34b	A3	AT4G02430_CR1	AT4G02430_ID3	gun1_0h	WT_0h
AT4G02430	Barta et al (2010) have proposed a nomenclature for Serine/Arginine-Rich Protein Splicing Factors (SR proteins): Plant Cell. 2010, 22:2926.	At-SR34b,SR34b	IR	AT4G02430_CR1	AT4G02430_ID3	gun1_0h	WT_0h
AT4G02890	Polyubiquitin gene containing 4 ubiquitin repeats.	UBQ14	A5	AT4G02890_P4	AT4G02890.1	gun1_0h	WT_0h
AT4G02890	Polyubiquitin gene containing 4 ubiquitin repeats.	UBQ14	IR	AT4G02890_P4	AT4G02890.1	gun1_0h	WT_0h
AT4G03030	Galactose oxidase/kelch repeat superfamily protein;(source:Araport11)	NA	A5	AT4G03030_P1	AT4G03030_ID1	gun1_0h	WT_0h
AT4G03030	Galactose oxidase/kelch repeat superfamily protein;(source:Araport11)	NA	IR	AT4G03030_P1	AT4G03030_ID1	gun1_0h	WT_0h
AT4G03415	Encodes a myristoylated 2C-type protein phosphatase that interacts with AGB1 and is localized to the plasma membrane.	PP2C52	A5	AT4G03415_P1	AT4G03415_P2	gun1_0h	WT_0h
AT4G04040	Encodes a pyrophosphate-dependent phosphofructokinase B subunit (PFPbeta2).	MEE51	A5	AT4G04040_P1	AT4G04040_c6	gun1_0h	WT_0h
AT4G04190	transmembrane protein;(source:Araport11)	NA	IR	AT4G04190_ID3	AT4G04190_P2	gun1_0h	WT_0h
AT4G04190	transmembrane protein;(source:Araport11)	NA	MES	AT4G04190_ID3	AT4G04190_P2	gun1_0h	WT_0h
AT4G04320	malonyl-CoA decarboxylase family protein;(source:Araport11)	NA	A3	AT4G04320_P1	AT4G04320_ID12	gun1_0h	WT_0h
AT4G05050	polyubiquitin gene, belongs to a subtype group with UBQ10 and UBQ14. Various ecotypes of Arabidopsis have different numbers of ubiquitin repeats within this gene.	UBQ11	IR	AT4G05050_P1	AT4G05050_s1	gun1_0h	WT_0h
AT4G08850	MIK1 encodes a receptor kinase that forms a complex with MDIS1/MIK2 and binds LURE1, the female pollen guidance chemi-attractant. MIK1 phosphorylates MDIS1 and is autophosphorylated.	MIK2	A5	AT4G08850_P1	AT4G08850_s1	gun1_0h	WT_0h
AT4G09630	transmembrane protein (DUF616);(source:Araport11)	NA	A5	AT4G09630_P1	AT4G09630_c2	gun1_0h	WT_0h
AT4G09630	transmembrane protein (DUF616);(source:Araport11)	NA	IR	AT4G09630_P1	AT4G09630_P2	gun1_0h	WT_0h
AT4G10420	FBD / Leucine Rich Repeat domains containing protein;(source:Araport11)	NA	IR	AT4G10420_P1	AT4G10420_ID2	gun1_0h	WT_0h
AT4G10550	Subtilase family protein;(source:Araport11)	NA	IR	AT4G10550_P2	AT4G10550.3	gun1_0h	WT_0h
AT4G10550	Subtilase family protein;(source:Araport11)	NA	IR	AT4G10550_P2	AT4G10550_P1	gun1_0h	WT_0h
AT4G10590	encodes a member of the ubiquitin-specific protease family, UBP10	UBP10	IR	AT4G10590_ID11	AT4G10590_P2	gun1_0h	WT_0h
AT4G10730	Protein kinase superfamily protein	NA	A3	AT4G10730_P1	AT4G10730_s2	gun1_0h	WT_0h
AT4G10730	Protein kinase superfamily protein	NA	IR	AT4G10730_P1	AT4G10730_s2	gun1_0h	WT_0h
AT4G11270	Transducin/WD40 repeat-like superfamily protein;(source:Araport11)	NA	A3	AT4G11270_P1	AT4G11270_P2	gun1_0h	WT_0h
AT4G11270	Transducin/WD40 repeat-like superfamily protein;(source:Araport11)	NA	IR	AT4G11270_P1	AT4G11270_P2	gun1_0h	WT_0h
AT4G11420	Encodes a subunit of eukaryotic initiation factor 3 (eIF3), a multisubunit complex that is required for binding of mRNA to 40 S ribosomal subunits, stabilization of ternary complex binding to 40 S subunits, and dissociation of 40 and 60 S subunits.	ATEIF3A-1,ATTIF3A1,EIF3A,EIF3A-1,TIF3A1	IR	AT4G11420_P1	AT4G11420_ID7	gun1_0h	WT_0h
AT4G11820	Encodes a protein with hydroxymethylglutaryl-CoA synthase activity which was characterized by phenotypical complementation of the S. cerevisiae mutant. Involved in glucosinolate biosynthesis.	FKP1,HMGS,MVA1	ES	AT4G11820_P2	AT4G11820.1	gun1_0h	WT_0h
AT4G11820	Encodes a protein with hydroxymethylglutaryl-CoA synthase activity which was characterized by phenotypical complementation of the S. cerevisiae mutant. Involved in glucosinolate biosynthesis.	FKP1,HMGS,MVA1	IR	AT4G11820_P2	AT4G11820.1	gun1_0h	WT_0h
AT4G11820	Encodes a protein with hydroxymethylglutaryl-CoA synthase activity which was characterized by phenotypical complementation of the S. cerevisiae mutant. Involved in glucosinolate biosynthesis.	FKP1,HMGS,MVA1	IR	AT4G11820_P2	AT4G11820_JS7	gun1_0h	WT_0h
AT4G12430	Haloacid dehalogenase-like hydrolase (HAD) superfamily protein;(source:Araport11)	TPPF	A3	AT4G12430.1	AT4G12430_ID1	gun1_0h	WT_0h
AT4G12780	Negative regulation of growth and endocytosis, most likely as a result of inhibition of the recruitment of clathrin to endocytic pits. Overexpression inhbits recruitment of clathrin resulting in negative regulation of endocytosis and developmental arrest.	AUXILIN-LIKE1	IR	AT4G12780_P6	AT4G12780_P4	gun1_0h	WT_0h
AT4G12990	transmembrane protein;(source:Araport11)	NA	IR	AT4G12990_P6	AT4G12990_s6	gun1_0h	WT_0h
AT4G13670	plastid transcriptionally active 5;(source:Araport11)	PTAC5	A5	AT4G13670_ID8	AT4G13670_ID6	gun1_0h	WT_0h
AT4G13670	plastid transcriptionally active 5;(source:Araport11)	PTAC5	A3	AT4G13670_ID8	AT4G13670_P1	gun1_0h	WT_0h
AT4G13670	plastid transcriptionally active 5;(source:Araport11)	PTAC5	A5	AT4G13670_ID8	AT4G13670_P1	gun1_0h	WT_0h
AT4G13670	plastid transcriptionally active 5;(source:Araport11)	PTAC5	IR	AT4G13670_ID8	AT4G13670_P1	gun1_0h	WT_0h
AT4G13670	plastid transcriptionally active 5;(source:Araport11)	PTAC5	A3	AT4G13670_ID8	AT4G13670_s1	gun1_0h	WT_0h
AT4G13670	plastid transcriptionally active 5;(source:Araport11)	PTAC5	IR	AT4G13670_ID8	AT4G13670_s1	gun1_0h	WT_0h
AT4G13940	Encodes a S-adenosyl-L-homocysteine hydrolase required for DNA methylation-dependent gene silencing. The mRNA is cell-to-cell mobile.	ATSAHH1,EMB1395,HOG1,MEE58,SAH1,SAHH1	A3	AT4G13940_P1	AT4G13940_ID3	gun1_0h	WT_0h
AT4G13940	Encodes a S-adenosyl-L-homocysteine hydrolase required for DNA methylation-dependent gene silencing. The mRNA is cell-to-cell mobile.	ATSAHH1,EMB1395,HOG1,MEE58,SAH1,SAHH1	A5	AT4G13940_P1	AT4G13940_ID3	gun1_0h	WT_0h
AT4G14000	Putative methyltransferase family protein;(source:Araport11)	NA	A3	AT4G14000_ID1	AT4G14000.1	gun1_0h	WT_0h
AT4G14340	Phosphorylates serine or threonine residues that are near and C-terminal to acidic side chains on a variety of target proteins. Member of CKL gene family (CKL-C group).	CKI1,CKL11	IR	AT4G14340_P1	AT4G14340_c3	gun1_0h	WT_0h
AT4G14500	Polyketide cyclase/dehydrase and lipid transport superfamily protein;(source:Araport11)	NA	A3	AT4G14500.1	AT4G14500_ID10	gun1_0h	WT_0h
AT4G14500	Polyketide cyclase/dehydrase and lipid transport superfamily protein;(source:Araport11)	NA	MES	AT4G14500.1	AT4G14500_ID10	gun1_0h	WT_0h
AT4G15230	pleiotropic drug resistance 2;(source:Araport11)	ABCG30,ATPDR2,PDR2	IR	AT4G15230.1	AT4G15230_c1	gun1_0h	WT_0h
AT4G15233	ABC-2 and Plant PDR ABC-type transporter family protein;(source:Araport11)	ABCG42	A3	AT4G15233_c1	AT4G15233_JS4	gun1_0h	WT_0h
AT4G15233	ABC-2 and Plant PDR ABC-type transporter family protein;(source:Araport11)	ABCG42	IR	AT4G15233_JC33	AT4G15233_JS4	gun1_0h	WT_0h
AT4G15233	ABC-2 and Plant PDR ABC-type transporter family protein;(source:Araport11)	ABCG42	IR	AT4G15233_c1	AT4G15233_JS4	gun1_0h	WT_0h
AT4G15233	ABC-2 and Plant PDR ABC-type transporter family protein;(source:Araport11)	ABCG42	MES	AT4G15233_JC33	AT4G15233_JS4	gun1_0h	WT_0h
AT4G15233	ABC-2 and Plant PDR ABC-type transporter family protein;(source:Araport11)	ABCG42	MES	AT4G15233_c1	AT4G15233_JS4	gun1_0h	WT_0h
AT4G15233	ABC-2 and Plant PDR ABC-type transporter family protein;(source:Araport11)	ABCG42	A3	AT4G15233_JC33	AT4G15233_P6	gun1_0h	WT_0h
AT4G15233	ABC-2 and Plant PDR ABC-type transporter family protein;(source:Araport11)	ABCG42	IR	AT4G15233_JC33	AT4G15233_P6	gun1_0h	WT_0h
AT4G16330	2-oxoglutarate (2OG) and Fe(II)-dependent oxygenase superfamily protein;(source:Araport11)	NA	IR	AT4G16330_P1	AT4G16330.2	gun1_0h	WT_0h
AT4G16680	P-loop containing nucleoside triphosphate hydrolases superfamily protein;(source:Araport11)	NA	IR	AT4G16680_P2	AT4G16680_P1	gun1_0h	WT_0h
AT4G16765	2-oxoglutarate (2OG) and Fe(II)-dependent oxygenase superfamily protein;(source:Araport11)	NA	A3	AT4G16765_P6	AT4G16765_P3	gun1_0h	WT_0h
AT4G16765	2-oxoglutarate (2OG) and Fe(II)-dependent oxygenase superfamily protein;(source:Araport11)	NA	IR	AT4G16765_P6	AT4G16765_P3	gun1_0h	WT_0h
AT4G16765	2-oxoglutarate (2OG) and Fe(II)-dependent oxygenase superfamily protein;(source:Araport11)	NA	IR	AT4G16765_P5	AT4G16765_P3	gun1_0h	WT_0h
AT4G16990	disease resistance protein (TIR-NBS class);(source:Araport11)	RLM3	A3	AT4G16990_JC1	AT4G16990_JC2	gun1_0h	WT_0h
AT4G16990	disease resistance protein (TIR-NBS class);(source:Araport11)	RLM3	A3	AT4G16990_JC1	AT4G16990_P8	gun1_0h	WT_0h
AT4G16990	disease resistance protein (TIR-NBS class);(source:Araport11)	RLM3	IR	AT4G16990_JC1	AT4G16990_P8	gun1_0h	WT_0h
AT4G19420	Pectinacetylesterase family protein;(source:Araport11)	PAE8	IR	AT4G19420_P1	AT4G19420_JS1	gun1_0h	WT_0h
AT4G19440	Tetratricopeptide repeat (TPR)-like superfamily protein;(source:Araport11)	NA	A3	AT4G19440_P4	AT4G19440_P1	gun1_0h	WT_0h
AT4G19440	Tetratricopeptide repeat (TPR)-like superfamily protein;(source:Araport11)	NA	A3	AT4G19440_P4	AT4G19440_P3	gun1_0h	WT_0h
AT4G21350	Encodes a U-box/ARM repeat protein required fore self-incompatibility.	B80,PUB8	A3	AT4G21350_c1	AT4G21350_s1	gun1_0h	WT_0h
AT4G21350	Encodes a U-box/ARM repeat protein required fore self-incompatibility.	B80,PUB8	A5	AT4G21350_c1	AT4G21350_s1	gun1_0h	WT_0h
AT4G21350	Encodes a U-box/ARM repeat protein required fore self-incompatibility.	B80,PUB8	ES	AT4G21350_c1	AT4G21350_s1	gun1_0h	WT_0h
AT4G22780	Member of a family of ACT domain containing proteins . ACT domains are involved in amino acid binding .	ACR7	IR	AT4G22780_P1	AT4G22780_s1	gun1_0h	WT_0h
AT4G23020	hypothetical protein;(source:Araport11)	TRM11	IR	AT4G23020_P1	AT4G23020_JS2	gun1_0h	WT_0h
AT4G23020	hypothetical protein;(source:Araport11)	TRM11	IR	AT4G23020_P1	AT4G23020_s2	gun1_0h	WT_0h
AT4G23660	Encodes para-hydroxy benzoate polyprenyl diphosphate transferase. The enzyme was shown to be able to use a wide range of prenyl substrates : from GPP (C10) to decaprenyl diphosphate (C50).	AtPPT1,PPT1	IR	AT4G23660_P1	AT4G23660_P4	gun1_0h	WT_0h
AT4G24015	RING/U-box superfamily protein;(source:Araport11)	NA	A3	AT4G24015_c3	AT4G24015_c8	gun1_0h	WT_0h
AT4G24380	dihydrofolate reductase;(source:Araport11)	NA	IR	AT4G24380_P2	AT4G24380_P1	gun1_0h	WT_0h
AT4G24380	dihydrofolate reductase;(source:Araport11)	NA	IR	AT4G24380_P3	AT4G24380_P1	gun1_0h	WT_0h
AT4G24740	a LAMMER-type protein kinase that co-precipitates with serine/arginine-rich (SR) proteins in vitro, interaction modulated by phosphorylation of the proteins.	AFC2,AME1,FC2	IR	AT4G24740_P6	AT4G24740_P7	gun1_0h	WT_0h
AT4G25390	Protein kinase superfamily protein;(source:Araport11)	NA	IR	AT4G25390_P1	AT4G25390.2	gun1_0h	WT_0h
AT4G25630	encodes a fibrillarin, a key nucleolar protein in eukaryotes which associates with box C/D small nucleolar RNAs (snoRNAs) directing 2'-O-ribose methylation of the rRNA. This gene also encodes a novel box C/D snoRNA, U60.2f in its fifth intron that accumulates in seedlings and that their targeted residue on the 25 S rRNA is methylated. The mRNA is cell-to-cell mobile.	ATFIB2,FIB2	A3	AT4G25630_P1	AT4G25630_ID1	gun1_0h	WT_0h
AT4G25630	encodes a fibrillarin, a key nucleolar protein in eukaryotes which associates with box C/D small nucleolar RNAs (snoRNAs) directing 2'-O-ribose methylation of the rRNA. This gene also encodes a novel box C/D snoRNA, U60.2f in its fifth intron that accumulates in seedlings and that their targeted residue on the 25 S rRNA is methylated. The mRNA is cell-to-cell mobile.	ATFIB2,FIB2	A5	AT4G25630_P1	AT4G25630_ID1	gun1_0h	WT_0h
AT4G25630	encodes a fibrillarin, a key nucleolar protein in eukaryotes which associates with box C/D small nucleolar RNAs (snoRNAs) directing 2'-O-ribose methylation of the rRNA. This gene also encodes a novel box C/D snoRNA, U60.2f in its fifth intron that accumulates in seedlings and that their targeted residue on the 25 S rRNA is methylated. The mRNA is cell-to-cell mobile.	ATFIB2,FIB2	MES	AT4G25630_P1	AT4G25630_ID1	gun1_0h	WT_0h
AT4G25910	Encodes a protein containing the NFU domain that may be involved in iron-sulfur cluster assembly. Part of a five member gene family, more closely related to NFU1 and 2 than to NFU4 and 5. Targeted to the chloroplast. The mRNA is cell-to-cell mobile.	ATCNFU3,NFU3	IR	AT4G25910_P1	AT4G25910_ID1	gun1_0h	WT_0h
AT4G26190	Haloacid dehalogenase-like hydrolase (HAD) superfamily protein;(source:Araport11)	NA	IR	AT4G26190_P1	AT4G26190_c6	gun1_0h	WT_0h
AT4G27440	light-dependent NADPH:protochlorophyllide oxidoreductase B The mRNA is cell-to-cell mobile.	PORB	IR	AT4G27440.1	AT4G27440.2	gun1_0h	WT_0h
AT4G27620	intracellular protein transporter;(source:Araport11)	NA	A5	AT4G27620_P2	AT4G27620_P1	gun1_0h	WT_0h
AT4G28020	tRNA-thr(GGU) m(6)t(6)A37 methyltransferase;(source:Araport11)	NA	IR	AT4G28020_P1	AT4G28020_P2	gun1_0h	WT_0h
AT4G28020	tRNA-thr(GGU) m(6)t(6)A37 methyltransferase;(source:Araport11)	NA	IR	AT4G28020_P1	AT4G28020_P4	gun1_0h	WT_0h
AT4G28360	Ribosomal protein L22p/L17e family protein;(source:Araport11)	NA	A3	AT4G28360_P1	AT4G28360_ID1	gun1_0h	WT_0h
AT4G28360	Ribosomal protein L22p/L17e family protein;(source:Araport11)	NA	A5	AT4G28360_P1	AT4G28360_ID1	gun1_0h	WT_0h
AT4G28360	Ribosomal protein L22p/L17e family protein;(source:Araport11)	NA	ES	AT4G28360_P1	AT4G28360_ID1	gun1_0h	WT_0h
AT4G28880	Member of CKL gene family (CKL-A group)	ckl3	IR	AT4G28880_P1	AT4G28880_P2	gun1_0h	WT_0h
AT4G29060	Involved in chloroplast biogenesis and early embryo development. May function as an EF-Ts to regulate plastid translation.	emb2726	A3	AT4G29060_P1	AT4G29060_ID66	gun1_0h	WT_0h
AT4G29060	Involved in chloroplast biogenesis and early embryo development. May function as an EF-Ts to regulate plastid translation.	emb2726	A5	AT4G29060_P1	AT4G29060_ID66	gun1_0h	WT_0h
AT4G29060	Involved in chloroplast biogenesis and early embryo development. May function as an EF-Ts to regulate plastid translation.	emb2726	ES	AT4G29060_P1	AT4G29060_ID66	gun1_0h	WT_0h
AT4G29060	Involved in chloroplast biogenesis and early embryo development. May function as an EF-Ts to regulate plastid translation.	emb2726	A3	AT4G29060_P1	AT4G29060_ID84	gun1_0h	WT_0h
AT4G29060	Involved in chloroplast biogenesis and early embryo development. May function as an EF-Ts to regulate plastid translation.	emb2726	IR	AT4G29060_P1	AT4G29060_ID84	gun1_0h	WT_0h
AT4G29060	Involved in chloroplast biogenesis and early embryo development. May function as an EF-Ts to regulate plastid translation.	emb2726	MES	AT4G29060_P1	AT4G29060_ID84	gun1_0h	WT_0h
AT4G29530	Encodes a thiamin monophosphate phosphatase. Knockouts show no visible defects either in morphology or thiamin, ThMP and ThDP levels suggesting that Arabidopsis at least one other source of ThMPase activity.	NA	IR	AT4G29530_P1	AT4G29530_P2	gun1_0h	WT_0h
AT4G30900	DNAse I-like superfamily protein;(source:Araport11)	NA	A3	AT4G30900_P2	AT4G30900_ID3	gun1_0h	WT_0h
AT4G30900	DNAse I-like superfamily protein;(source:Araport11)	NA	A5	AT4G30900_P2	AT4G30900_ID3	gun1_0h	WT_0h
AT4G30910	Cytosol aminopeptidase family protein;(source:Araport11)	NA	IR	AT4G30910_P2	AT4G30910_c1	gun1_0h	WT_0h
AT4G31390	Protein kinase superfamily protein;(source:Araport11)	ABC1K1,ACDO1,AtACDO1,PGR6	IR	AT4G31390_ID8	AT4G31390_ID9	gun1_0h	WT_0h
AT4G31450	RING/U-box superfamily protein;(source:Araport11)	NA	A5	AT4G31450_P1	AT4G31450_JC2	gun1_0h	WT_0h
AT4G31877	Encodes a microRNA that targets several SPL family members, including SPL3,4, and 5. By regulating the expression of SPL3 (and probably also SPL4 and SPL5), this microRNA regulates vegetative phase change. MicroRNAs are regulatory RNAs with a mature length of ~21-nucleotides that are processed from hairpin precursors by Dicer-like enzymes. MicroRNAs can negatively regulate gene expression by atte…	MIR156C	A3	AT4G31877_c3	AT4G31877.1	gun1_0h	WT_0h
AT4G31877	Encodes a microRNA that targets several SPL family members, including SPL3,4, and 5. By regulating the expression of SPL3 (and probably also SPL4 and SPL5), this microRNA regulates vegetative phase change. MicroRNAs are regulatory RNAs with a mature length of ~21-nucleotides that are processed from hairpin precursors by Dicer-like enzymes. MicroRNAs can negatively regulate gene expression by atte…	MIR156C	A5	AT4G31877_c3	AT4G31877.1	gun1_0h	WT_0h
AT4G31877	Encodes a microRNA that targets several SPL family members, including SPL3,4, and 5. By regulating the expression of SPL3 (and probably also SPL4 and SPL5), this microRNA regulates vegetative phase change. MicroRNAs are regulatory RNAs with a mature length of ~21-nucleotides that are processed from hairpin precursors by Dicer-like enzymes. MicroRNAs can negatively regulate gene expression by atte…	MIR156C	IR	AT4G31877_c3	AT4G31877.1	gun1_0h	WT_0h
AT4G32060	Encodes an EF-hand protein with homology to constituents of the mitochondrial Ca2+ uniporter machinery in mammals. MICU binds Ca2+ and localizes to the mitochondria in Arabidopsis. It is a negative regulator of mitochondrial calcium uptake. Mutants display elevated matrix calcium at steady state and modified calcium transient kinetics in vivo.	MICU	IR	AT4G32060_ID12	AT4G32060_ID11	gun1_0h	WT_0h
AT4G32060	Encodes an EF-hand protein with homology to constituents of the mitochondrial Ca2+ uniporter machinery in mammals. MICU binds Ca2+ and localizes to the mitochondria in Arabidopsis. It is a negative regulator of mitochondrial calcium uptake. Mutants display elevated matrix calcium at steady state and modified calcium transient kinetics in vivo.	MICU	A5	AT4G32060_ID12	AT4G32060_P1	gun1_0h	WT_0h
AT4G32060	Encodes an EF-hand protein with homology to constituents of the mitochondrial Ca2+ uniporter machinery in mammals. MICU binds Ca2+ and localizes to the mitochondria in Arabidopsis. It is a negative regulator of mitochondrial calcium uptake. Mutants display elevated matrix calcium at steady state and modified calcium transient kinetics in vivo.	MICU	IR	AT4G32060_ID12	AT4G32060_P1	gun1_0h	WT_0h
AT4G32330	WDL5 is an target of EIN3 that co-localizes with cortical microtubles. It its thought to function to stabilize microtubles during ethylene induced hypocotyl elongation.	WDL5	IR	AT4G32330.1	AT4G32330_ID86	gun1_0h	WT_0h
AT4G32920	glycine-rich protein;(source:Araport11)	NA	A5	AT4G32920_c2	AT4G32920_P1	gun1_0h	WT_0h
AT4G32920	glycine-rich protein;(source:Araport11)	NA	A5	AT4G32920.2	AT4G32920_P1	gun1_0h	WT_0h
AT4G32920	glycine-rich protein;(source:Araport11)	NA	IR	AT4G32920.2	AT4G32920_P1	gun1_0h	WT_0h
AT4G33000	Encodes a member of the calcineurin B-like calcium sensor gene family. Mediates salt tolerance by regulating ion homeostasis in Arabidopsis.	ATCBL10,CBL10,SCABP8	A3	AT4G33000_P4	AT4G33000_c1	gun1_0h	WT_0h
AT4G33000	Encodes a member of the calcineurin B-like calcium sensor gene family. Mediates salt tolerance by regulating ion homeostasis in Arabidopsis.	ATCBL10,CBL10,SCABP8	IR	AT4G33000_ID30	AT4G33000_c1	gun1_0h	WT_0h
AT4G33000	Encodes a member of the calcineurin B-like calcium sensor gene family. Mediates salt tolerance by regulating ion homeostasis in Arabidopsis.	ATCBL10,CBL10,SCABP8	IR	AT4G33000_P4	AT4G33000_c1	gun1_0h	WT_0h
AT4G33000	Encodes a member of the calcineurin B-like calcium sensor gene family. Mediates salt tolerance by regulating ion homeostasis in Arabidopsis.	ATCBL10,CBL10,SCABP8	A3	AT4G33000_ID30	AT4G33000_P3	gun1_0h	WT_0h
AT4G33000	Encodes a member of the calcineurin B-like calcium sensor gene family. Mediates salt tolerance by regulating ion homeostasis in Arabidopsis.	ATCBL10,CBL10,SCABP8	IR	AT4G33000_ID30	AT4G33000_P3	gun1_0h	WT_0h
AT4G33000	Encodes a member of the calcineurin B-like calcium sensor gene family. Mediates salt tolerance by regulating ion homeostasis in Arabidopsis.	ATCBL10,CBL10,SCABP8	IR	AT4G33000_P4	AT4G33000_P3	gun1_0h	WT_0h
AT4G33000	Encodes a member of the calcineurin B-like calcium sensor gene family. Mediates salt tolerance by regulating ion homeostasis in Arabidopsis.	ATCBL10,CBL10,SCABP8	A3	AT4G33000_P4	AT4G33000_s1	gun1_0h	WT_0h
AT4G33000	Encodes a member of the calcineurin B-like calcium sensor gene family. Mediates salt tolerance by regulating ion homeostasis in Arabidopsis.	ATCBL10,CBL10,SCABP8	A5	AT4G33000_P4	AT4G33000_s1	gun1_0h	WT_0h
AT4G33000	Encodes a member of the calcineurin B-like calcium sensor gene family. Mediates salt tolerance by regulating ion homeostasis in Arabidopsis.	ATCBL10,CBL10,SCABP8	A5	AT4G33000_ID30	AT4G33000_s1	gun1_0h	WT_0h
AT4G33000	Encodes a member of the calcineurin B-like calcium sensor gene family. Mediates salt tolerance by regulating ion homeostasis in Arabidopsis.	ATCBL10,CBL10,SCABP8	A3	AT4G33000_ID30	AT4G33000_s2	gun1_0h	WT_0h
AT4G33000	Encodes a member of the calcineurin B-like calcium sensor gene family. Mediates salt tolerance by regulating ion homeostasis in Arabidopsis.	ATCBL10,CBL10,SCABP8	A3	AT4G33000_P4	AT4G33000_s2	gun1_0h	WT_0h
AT4G33000	Encodes a member of the calcineurin B-like calcium sensor gene family. Mediates salt tolerance by regulating ion homeostasis in Arabidopsis.	ATCBL10,CBL10,SCABP8	IR	AT4G33000_P4	AT4G33000_s2	gun1_0h	WT_0h
AT4G33000	Encodes a member of the calcineurin B-like calcium sensor gene family. Mediates salt tolerance by regulating ion homeostasis in Arabidopsis.	ATCBL10,CBL10,SCABP8	IR	AT4G33000_ID30	AT4G33000_s2	gun1_0h	WT_0h
AT4G33580	beta carbonic anhydrase 5;(source:Araport11)	ATBCA5,BCA5	A5	AT4G33580_JC19	AT4G33580_P1	gun1_0h	WT_0h
AT4G33910	2-oxoglutarate (2OG) and Fe(II)-dependent oxygenase superfamily protein;(source:Araport11)	NA	IR	AT4G33910_P1	AT4G33910_ID3	gun1_0h	WT_0h
AT4G34970	A member of actin polymerizing factors (ADFs)family, ADF9 primarily functions as an actin bundling protein.	ADF9	IR	AT4G34970_P1	AT4G34970_JS2	gun1_0h	WT_0h
AT4G35310	calmodulin-domain protein kinase CDPK isoform 5 (CPK5)	ATCPK5,CPK5	A5	AT4G35310_P1	AT4G35310_s2	gun1_0h	WT_0h
AT4G35785	RNA-binding (RRM/RBD/RNP motifs) family protein;(source:Araport11)	NA	A3	AT4G35785_P2	AT4G35785_JS4	gun1_0h	WT_0h
AT4G35785	RNA-binding (RRM/RBD/RNP motifs) family protein;(source:Araport11)	NA	IR	AT4G35785_P3	AT4G35785_JS4	gun1_0h	WT_0h
AT4G35785	RNA-binding (RRM/RBD/RNP motifs) family protein;(source:Araport11)	NA	IR	AT4G35785_P2	AT4G35785_JS4	gun1_0h	WT_0h
AT4G35940	hypothetical protein;(source:Araport11)	NA	A5	AT4G35940_c2	AT4G35940.1	gun1_0h	WT_0h
AT4G35940	hypothetical protein;(source:Araport11)	NA	A5	AT4G35940_c2	AT4G35940_P8	gun1_0h	WT_0h
AT4G35940	hypothetical protein;(source:Araport11)	NA	IR	AT4G35940_c2	AT4G35940_P8	gun1_0h	WT_0h
AT4G36520	Chaperone DnaJ-domain superfamily protein;(source:Araport11)	AUXILIN-LIKE4	A3	AT4G36520_P1	AT4G36520_s1	gun1_0h	WT_0h
AT4G36520	Chaperone DnaJ-domain superfamily protein;(source:Araport11)	AUXILIN-LIKE4	A5	AT4G36520_P1	AT4G36520_s1	gun1_0h	WT_0h
AT4G36648	other_RNA;(source:Araport11)	NA	IR	AT4G36648.1	AT4G36648_c1	gun1_0h	WT_0h
AT4G36648	other_RNA;(source:Araport11)	NA	A5	AT4G36648.1	AT4G36648_ID4	gun1_0h	WT_0h
AT4G36648	other_RNA;(source:Araport11)	NA	IR	AT4G36648.1	AT4G36648_ID4	gun1_0h	WT_0h
AT4G37300	maternal effect embryo arrest 59;(source:Araport11)	MEE59	IR	AT4G37300.1	AT4G37300_c1	gun1_0h	WT_0h
AT4G37480	Chaperone DnaJ-domain superfamily protein;(source:Araport11)	NA	A5	AT4G37480_P1	AT4G37480_ID1	gun1_0h	WT_0h
AT4G37480	Chaperone DnaJ-domain superfamily protein;(source:Araport11)	NA	IR	AT4G37480_P1	AT4G37480_ID1	gun1_0h	WT_0h
AT4G37480	Chaperone DnaJ-domain superfamily protein;(source:Araport11)	NA	IR	AT4G37480_P1	AT4G37480_ID4	gun1_0h	WT_0h
AT4G38910	Encodes a basic pentacysteine protein that is localized to the nucleus and specifically binds in vitro to GA dinucleotide repeats.	ATBPC5,BBR/BPC5,BPC5	A3	AT4G38910.1	AT4G38910_ID1	gun1_0h	WT_0h
AT4G38980	hypothetical protein;(source:Araport11)	NA	A5	AT4G38980_P1	AT4G38980_c1	gun1_0h	WT_0h
AT4G39210	Encodes the large subunit of ADP-Glucose Pyrophosphorylase which catalyzes the first, rate limiting step in starch biosynthesis. The large subunit plays a regulatory role whereas the small subunit (ApS) is the catalytic isoform. Four isoforms (ApL1-4) have been identified. ApL3 is the major large subunit isoform present in inflorescences, fruits and roots.	APL3	A5	AT4G39210_P1	AT4G39210_c2	gun1_0h	WT_0h
AT5G04090	histidine-tRNA ligase;(source:Araport11)	NA	MES	AT5G04090_ID2	AT5G04090_ID9	gun1_0h	WT_0h
AT5G04090	histidine-tRNA ligase;(source:Araport11)	NA	IR	AT5G04090_ID2	AT5G04090_P4	gun1_0h	WT_0h
AT5G04140	Encodes a gene whose sequence is similar to ferredoxin dependent glutamate synthase (Fd-GOGAT). Expression in leaves is induced by light and sucrose. Proposed to be involved in photorespiration and nitrogen assimilation. The mRNA is cell-to-cell mobile.	FD-GOGAT,GLS1,GLU1,GLUS	IR	AT5G04140_P1	AT5G04140_s1	gun1_0h	WT_0h
AT5G04360	Encodes an enzyme thought to be involved in the hydrolysis of the &	ATLDA,ATPU1,LDA,PU1	IR	AT5G04360_P2	AT5G04360_JS17	gun1_0h	WT_0h
AT5G04420	Galactose oxidase/kelch repeat superfamily protein;(source:Araport11)	NA	IR	AT5G04420.1	AT5G04420.3	gun1_0h	WT_0h
AT5G05540	small RNA degrading nuclease 2;(source:Araport11)	SDN2	IR	AT5G05540_P2	AT5G05540_P1	gun1_0h	WT_0h
AT5G05610	Encodes a member of the Alfin1-like family of nuclear-localized PHD (plant homeodomain) domain containing proteins. All AL proteins except AL3 bind to di- or trimethylated histone H3 (H3K4me3/2). Members of this family include: AT5G05610 (AL1), AT3G11200 (AL2), AT3G42790 (AL3), AT5G26210 (AL4), AT5G20510 (AL5), AT2G02470 (AL6), AT1G14510 (AL7).	AL1	IR	AT5G05610_P2	AT5G05610_P1	gun1_0h	WT_0h
AT5G06350	ARM repeat superfamily protein;(source:Araport11)	NA	A5	AT5G06350_P2	AT5G06350_JC4	gun1_0h	WT_0h
AT5G06350	ARM repeat superfamily protein;(source:Araport11)	NA	IR	AT5G06350_P2	AT5G06350_JC4	gun1_0h	WT_0h
AT5G07300	Encodes a copine-like protein, which is a member of a newly identified class of calcium-dependent, phospholipid binding proteins that are present in a wide range of organisms.	BON2	IR	AT5G07300_P1	AT5G07300_c1	gun1_0h	WT_0h
AT5G07910	Leucine-rich repeat (LRR) family protein;(source:Araport11)	NA	A3	AT5G07910_P1	AT5G07910_ID4	gun1_0h	WT_0h
AT5G08139	RING/U-box superfamily protein;(source:Araport11)	NA	IR	AT5G08139_s1	AT5G08139_P1	gun1_0h	WT_0h
AT5G08450	Component of histone-deacetylase complexes. Interacts with HDA6 and HDA19 and facilitates histone deacetylation. Several salt-inducible genes are de-repressed in hdc1 mutants. Mutants are hypersensitive to ABA during germination, grow less and flower later than wildtype. HDC1-overexpressing plants display opposite phenotypes.	HDC1,RXT3-like	A3	AT5G08450_ID8	AT5G08450_P1	gun1_0h	WT_0h
AT5G08450	Component of histone-deacetylase complexes. Interacts with HDA6 and HDA19 and facilitates histone deacetylation. Several salt-inducible genes are de-repressed in hdc1 mutants. Mutants are hypersensitive to ABA during germination, grow less and flower later than wildtype. HDC1-overexpressing plants display opposite phenotypes.	HDC1,RXT3-like	IR	AT5G08450_ID8	AT5G08450_P1	gun1_0h	WT_0h
AT5G08710	Regulator of chromosome condensation (RCC1) family protein;(source:Araport11)	RUG1	A3	AT5G08710_ID8	AT5G08710_ID14	gun1_0h	WT_0h
AT5G08710	Regulator of chromosome condensation (RCC1) family protein;(source:Araport11)	RUG1	A5	AT5G08710_ID8	AT5G08710_ID14	gun1_0h	WT_0h
AT5G08710	Regulator of chromosome condensation (RCC1) family protein;(source:Araport11)	RUG1	A3	AT5G08710_ID8	AT5G08710_s1	gun1_0h	WT_0h
AT5G08710	Regulator of chromosome condensation (RCC1) family protein;(source:Araport11)	RUG1	IR	AT5G08710_ID8	AT5G08710_s1	gun1_0h	WT_0h
AT5G09230	Encodes SRT2, a member of the SIR2 (sirtuin) family HDAC (histone deacetylase) (SRT1/AT5g55760, SRT2/AT5G09230).	AtSRT2,SRT2	ES	AT5G09230_s1	AT5G09230_ID105	gun1_0h	WT_0h
AT5G09230	Encodes SRT2, a member of the SIR2 (sirtuin) family HDAC (histone deacetylase) (SRT1/AT5g55760, SRT2/AT5G09230).	AtSRT2,SRT2	IR	AT5G09230_s1	AT5G09230_ID105	gun1_0h	WT_0h
AT5G09230	Encodes SRT2, a member of the SIR2 (sirtuin) family HDAC (histone deacetylase) (SRT1/AT5g55760, SRT2/AT5G09230).	AtSRT2,SRT2	A5	AT5G09230_ID100	AT5G09230_P4	gun1_0h	WT_0h
AT5G09230	Encodes SRT2, a member of the SIR2 (sirtuin) family HDAC (histone deacetylase) (SRT1/AT5g55760, SRT2/AT5G09230).	AtSRT2,SRT2	A5	AT5G09230_s1	AT5G09230_P4	gun1_0h	WT_0h
AT5G09230	Encodes SRT2, a member of the SIR2 (sirtuin) family HDAC (histone deacetylase) (SRT1/AT5g55760, SRT2/AT5G09230).	AtSRT2,SRT2	ES	AT5G09230_ID100	AT5G09230_P4	gun1_0h	WT_0h
AT5G09230	Encodes SRT2, a member of the SIR2 (sirtuin) family HDAC (histone deacetylase) (SRT1/AT5g55760, SRT2/AT5G09230).	AtSRT2,SRT2	IR	AT5G09230_ID100	AT5G09230_P4	gun1_0h	WT_0h
AT5G09230	Encodes SRT2, a member of the SIR2 (sirtuin) family HDAC (histone deacetylase) (SRT1/AT5g55760, SRT2/AT5G09230).	AtSRT2,SRT2	IR	AT5G09230_s1	AT5G09230_P4	gun1_0h	WT_0h
AT5G09820	Encodes fibrillin 5 (FBN5). Located in chloroplast stroma. Essential for plastoquinone-9 biosynthesis. Stimulates enzymatic activity of solanesyl diphosphate synthases (SPS) 1 and 2 through binding to solanesyl moiety. Two splicing variants, named FBN5-A shorter one and FBN5-B longer one. FBN5-B is the protein detected in chloroplast stroma. Involved in plastoquinone biosynthesis.	FBN5	IR	AT5G09820_ID9	AT5G09820_P2	gun1_0h	WT_0h
AT5G09890	Ubiquitously expressed protein kinase.	NA	IR	AT5G09890_ID8	AT5G09890_ID12	gun1_0h	WT_0h
AT5G10200	ARM-repeat/Tetratricopeptide repeat (TPR)-like protein;(source:Araport11)	SAV4	ES	AT5G10200_P1	AT5G10200_P3	gun1_0h	WT_0h
AT5G10200	ARM-repeat/Tetratricopeptide repeat (TPR)-like protein;(source:Araport11)	SAV4	IR	AT5G10200_P1	AT5G10200_P3	gun1_0h	WT_0h
AT5G10440	Encodes a cyclin involved in cell proliferation during stomatal cell lineage development.	CYCD42	A5	AT5G10440_P2	AT5G10440_JS5	gun1_0h	WT_0h
AT5G10950	Tudor/PWWP/MBT superfamily protein;(source:Araport11)	NA	A3	AT5G10950_P1	AT5G10950_c2	gun1_0h	WT_0h
AT5G11510	Arabidopsis thaliana putative c-myb-like transcription factor MYB3R-4. Functions in powdery mildew induced host endoreduplication at the site of infection. Activates mitotic gene expression, cytokinin response.	AtMYB3R4,MYB3R-4	A3	AT5G11510_P3	AT5G11510_JC6	gun1_0h	WT_0h
AT5G12040	Nitrilase/cyanide hydratase and apolipoprotein N-acyltransferase family protein;(source:Araport11)	NA	IR	AT5G12040.2	AT5G12040_P1	gun1_0h	WT_0h
AT5G12280	SWAP (Suppressor-of-White-APricot)/surp RNA-binding domain-containing protein;(source:Araport11)	NA	IR	AT5G12280_P3	AT5G12280_P2	gun1_0h	WT_0h
AT5G13050	5-Formyltetrahydrofolate cycloligase (5-CHO-THF cycloligase - AT5G13050.1) regulates/influences under photorespiratory conditions the activity of another gene product, i.e. serine hydroxymethyltransferase (SHMT) due to accumulating amounts of 5-Formyltetrahydrofolate	5-FCL	IR	AT5G13050.1	AT5G13050_s1	gun1_0h	WT_0h
AT5G13410	FKBP-like peptidyl-prolyl cis-trans isomerase family protein;(source:Araport11)	NA	IR	AT5G13410_P1	AT5G13410_P2	gun1_0h	WT_0h
AT5G13890	plant viral-response family protein (DUF716);(source:Araport11)	NA	A3	AT5G13890_ID1	AT5G13890_ID2	gun1_0h	WT_0h
AT5G14000	NAC domain containing protein 84;(source:Araport11)	anac084,NAC084	IR	AT5G14000_P1	AT5G14000_P2	gun1_0h	WT_0h
AT5G14000	NAC domain containing protein 84;(source:Araport11)	anac084,NAC084	IR	AT5G14000_P1	AT5G14000_P3	gun1_0h	WT_0h
AT5G14740	Encodes a beta carbonic anhydrase likely to be localized in the cytoplasm. Expression of its mRNA is seen in etiolated seedlings and points to a possible nonphotosynthetic role for this isoform.	BETA_CA2,CA18,CA2	A5	AT5G14740_P9	AT5G14740_P1	gun1_0h	WT_0h
AT5G14740	Encodes a beta carbonic anhydrase likely to be localized in the cytoplasm. Expression of its mRNA is seen in etiolated seedlings and points to a possible nonphotosynthetic role for this isoform.	BETA_CA2,CA18,CA2	IR	AT5G14740_P9	AT5G14740_P1	gun1_0h	WT_0h
AT5G14740	Encodes a beta carbonic anhydrase likely to be localized in the cytoplasm. Expression of its mRNA is seen in etiolated seedlings and points to a possible nonphotosynthetic role for this isoform.	BETA_CA2,CA18,CA2	IR	AT5G14740_P9	AT5G14740_P6	gun1_0h	WT_0h
AT5G15120	2-aminoethanethiol dioxygenase, putative (DUF1637);(source:Araport11)	PCO1	IR	AT5G15120_ID2	AT5G15120_P1	gun1_0h	WT_0h
AT5G15540	Encodes Adherin SCC2. Essential for viability. Required for normal seed development. Plays a role in the establishment of sister-chromatid cohesion and chromosome organization during meiosis.	ATSCC2,EMB2773,SCC2	A3	AT5G15540_P1	AT5G15540_s1	gun1_0h	WT_0h
AT5G15540	Encodes Adherin SCC2. Essential for viability. Required for normal seed development. Plays a role in the establishment of sister-chromatid cohesion and chromosome organization during meiosis.	ATSCC2,EMB2773,SCC2	IR	AT5G15540_P1	AT5G15540_s1	gun1_0h	WT_0h
AT5G16470	zinc finger (C2H2 type) family protein;(source:Araport11)	MBS2	IR	AT5G16470_s1	AT5G16470_P1	gun1_0h	WT_0h
AT5G17440	LUC7 related protein;(source:Araport11)	LUC7B	A3	AT5G17440_P1	AT5G17440_s5	gun1_0h	WT_0h
AT5G17440	LUC7 related protein;(source:Araport11)	LUC7B	ES	AT5G17440_P1	AT5G17440_s5	gun1_0h	WT_0h
AT5G17440	LUC7 related protein;(source:Araport11)	LUC7B	IR	AT5G17440_P1	AT5G17440_s5	gun1_0h	WT_0h
AT5G18230	transcription regulator NOT2/NOT3/NOT5 family protein;(source:Araport11)	NA	IR	AT5G18230_P1	AT5G18230_s3	gun1_0h	WT_0h
AT5G18500	Protein kinase superfamily protein;(source:Araport11)	NA	IR	AT5G18500_P1	AT5G18500_P2	gun1_0h	WT_0h
AT5G18610	Encodes a receptor-like cytoplasmic kinase that is an immediate downstream component of the chitin receptor CERK1 and contributes to the regulation of chitin-induced immunity.	PBL27	A3	AT5G18610_P2	AT5G18610.1	gun1_0h	WT_0h
AT5G18610	Encodes a receptor-like cytoplasmic kinase that is an immediate downstream component of the chitin receptor CERK1 and contributes to the regulation of chitin-induced immunity.	PBL27	IR	AT5G18610_P2	AT5G18610.1	gun1_0h	WT_0h
AT5G19090	Heavy metal transport/detoxification superfamily protein;(source:Araport11)	NA	A3	AT5G19090.2	AT5G19090_c1	gun1_0h	WT_0h
AT5G19090	Heavy metal transport/detoxification superfamily protein;(source:Araport11)	NA	A3	AT5G19090_P1	AT5G19090_c1	gun1_0h	WT_0h
AT5G19090	Heavy metal transport/detoxification superfamily protein;(source:Araport11)	NA	A5	AT5G19090.2	AT5G19090_c1	gun1_0h	WT_0h
AT5G19090	Heavy metal transport/detoxification superfamily protein;(source:Araport11)	NA	A5	AT5G19090_P1	AT5G19090_c1	gun1_0h	WT_0h
AT5G19090	Heavy metal transport/detoxification superfamily protein;(source:Araport11)	NA	IR	AT5G19090_P1	AT5G19090_c1	gun1_0h	WT_0h
AT5G19210	P-loop containing nucleoside triphosphate hydrolases superfamily protein;(source:Araport11)	NA	A3	AT5G19210.1	AT5G19210_ID2	gun1_0h	WT_0h
AT5G19210	P-loop containing nucleoside triphosphate hydrolases superfamily protein;(source:Araport11)	NA	IR	AT5G19210.1	AT5G19210_ID2	gun1_0h	WT_0h
AT5G19210	P-loop containing nucleoside triphosphate hydrolases superfamily protein;(source:Araport11)	NA	A3	AT5G19210.1	AT5G19210_P2	gun1_0h	WT_0h
AT5G19221	Natural antisense transcript overlaps with AT5G19220;(source:Araport11)	NA	IR	AT5G19221.1	AT5G19221_JC5	gun1_0h	WT_0h
AT5G19510	Translation elongation factor EF1B/ribosomal protein S6 family protein;(source:Araport11)	NA	A3	AT5G19510.1	AT5G19510_ID2	gun1_0h	WT_0h
AT5G19620	AtOEP80 is paralog to the chloroplastic protein translocation channel Toc75. Mutations in this locus result in embryo lethality.	ATOEP80,EMB213,OEP80,TOC75-V	IR	AT5G19620_JS3	AT5G19620_s2	gun1_0h	WT_0h
AT5G20980	Encodes a plastidic methionine synthase, involved in methionine de novo synthesis in the chloroplast	ATMS3,MS3	A3	AT5G20980.2	AT5G20980_P1	gun1_0h	WT_0h
AT5G20980	Encodes a plastidic methionine synthase, involved in methionine de novo synthesis in the chloroplast	ATMS3,MS3	IR	AT5G20980.2	AT5G20980_P1	gun1_0h	WT_0h
AT5G21160	Encodes a protein with sequence similarity to mRNA binding proteins from humans. LARP1a is involved in mRNA degradation in response to heat stress. Upon heat stress LARP1a interacts with XRN4 and appears to be responsible for addressing XRN4 to the polysome. LARP1/XRN4 double mutants are impaired in thermotolerance and lower levels of heat induced RNA turnover.	AtLARP1a,LARP1a	A3	AT5G21160_P1	AT5G21160.2	gun1_0h	WT_0h
AT5G21160	Encodes a protein with sequence similarity to mRNA binding proteins from humans. LARP1a is involved in mRNA degradation in response to heat stress. Upon heat stress LARP1a interacts with XRN4 and appears to be responsible for addressing XRN4 to the polysome. LARP1/XRN4 double mutants are impaired in thermotolerance and lower levels of heat induced RNA turnover.	AtLARP1a,LARP1a	IR	AT5G21160_P1	AT5G21160.2	gun1_0h	WT_0h
AT5G21170	Encodes AKINbeta1, a subunit of the SnRK1 kinase (Sucrose non-fermenting-1-related protein kinase). Involved in regulation of nitrogen and sugar metabolism. As part of the regulatory subunit, it binds maltose which promotes kinase activity. Acts as a global regulator of genes involved in carbon, lipid and nitrogen metabolism.	AKINBETA1	IR	AT5G21170.1	AT5G21170_c1	gun1_0h	WT_0h
AT5G22040	ubiquitin carboxyl-terminal hydrolase;(source:Araport11)	NA	A3	AT5G22040.3	AT5G22040_P2	gun1_0h	WT_0h
AT5G22040	ubiquitin carboxyl-terminal hydrolase;(source:Araport11)	NA	IR	AT5G22040.3	AT5G22040_P2	gun1_0h	WT_0h
AT5G22040	ubiquitin carboxyl-terminal hydrolase;(source:Araport11)	NA	IR	AT5G22040_P1	AT5G22040_P2	gun1_0h	WT_0h
AT5G22040	ubiquitin carboxyl-terminal hydrolase;(source:Araport11)	NA	IR	AT5G22040_JS2	AT5G22040_P2	gun1_0h	WT_0h
AT5G23090	nuclear factor Y, subunit B13;(source:Araport11)	NF-YB13	A3	AT5G23090_ID4	AT5G23090_P1	gun1_0h	WT_0h
AT5G23090	nuclear factor Y, subunit B13;(source:Araport11)	NF-YB13	A3	AT5G23090_P2	AT5G23090_P1	gun1_0h	WT_0h
AT5G23610	DYAD protein;(source:Araport11)	NA	IR	AT5G23610_P1	AT5G23610_ID2	gun1_0h	WT_0h
AT5G23870	Encodes a pectin acetylesterase that removes cell wall acetate associated with pectin formation in Arabidopsis leaves.	PAE9	A3	AT5G23870_JC3	AT5G23870_P2	gun1_0h	WT_0h
AT5G23870	Encodes a pectin acetylesterase that removes cell wall acetate associated with pectin formation in Arabidopsis leaves.	PAE9	IR	AT5G23870_P1	AT5G23870_P2	gun1_0h	WT_0h
AT5G24060	Pentatricopeptide repeat (PPR) superfamily protein;(source:Araport11)	NA	A3	AT5G24060_JC5	AT5G24060_JC2	gun1_0h	WT_0h
AT5G24300	SSI is a plastidial enzyme and crucial for the synthesis of normal amylopectin in the leaves of Arabidopsis. The absence of SSI results in a deficiency in the number of shorter glucans which in turn affect the formation and connection of the amylopectin clusters in starch.	ATSS1,SS1	IR	AT5G24300_P1	AT5G24300.2	gun1_0h	WT_0h
AT5G26280	TRAF-like family protein;(source:Araport11)	NA	A3	AT5G26280_P3	AT5G26280_c2	gun1_0h	WT_0h
AT5G26770	NEAP2 is a member of a small family containing coiled-coil domains, a nuclear localization signal and a C-terminal predicted transmembrane domain. It localizes to the nuclear periphery. Mutants have altered nuclear morphology and chromatin structure.	AtNEAP2	IR	AT5G26770_P5	AT5G26770_P2	gun1_0h	WT_0h
AT5G27270	P-type PPR chloroplast localized protein required for group II intron splicing in chloroplasts.	EMB976	A3	AT5G27270_P3	AT5G27270_c1	gun1_0h	WT_0h
AT5G27270	P-type PPR chloroplast localized protein required for group II intron splicing in chloroplasts.	EMB976	A3	AT5G27270_P1	AT5G27270_c1	gun1_0h	WT_0h
AT5G27270	P-type PPR chloroplast localized protein required for group II intron splicing in chloroplasts.	EMB976	IR	AT5G27270_P3	AT5G27270_c1	gun1_0h	WT_0h
AT5G27270	P-type PPR chloroplast localized protein required for group II intron splicing in chloroplasts.	EMB976	IR	AT5G27270_P1	AT5G27270_c1	gun1_0h	WT_0h
AT5G27270	P-type PPR chloroplast localized protein required for group II intron splicing in chloroplasts.	EMB976	IR	AT5G27270_P3	AT5G27270_P2	gun1_0h	WT_0h
AT5G27300	pentatricopeptide (PPR) repeat-containing protein;(source:Araport11)	NA	A3	AT5G27300_c1	AT5G27300_JS7	gun1_0h	WT_0h
AT5G27300	pentatricopeptide (PPR) repeat-containing protein;(source:Araport11)	NA	ES	AT5G27300_c1	AT5G27300_JS7	gun1_0h	WT_0h
AT5G27300	pentatricopeptide (PPR) repeat-containing protein;(source:Araport11)	NA	IR	AT5G27300_c1	AT5G27300_JS7	gun1_0h	WT_0h
AT5G27300	pentatricopeptide (PPR) repeat-containing protein;(source:Araport11)	NA	A3	AT5G27300_JS14	AT5G27300_P1	gun1_0h	WT_0h
AT5G27300	pentatricopeptide (PPR) repeat-containing protein;(source:Araport11)	NA	ES	AT5G27300_c1	AT5G27300_P1	gun1_0h	WT_0h
AT5G27300	pentatricopeptide (PPR) repeat-containing protein;(source:Araport11)	NA	IR	AT5G27300_JS14	AT5G27300_P1	gun1_0h	WT_0h
AT5G27300	pentatricopeptide (PPR) repeat-containing protein;(source:Araport11)	NA	IR	AT5G27300_c4	AT5G27300_P1	gun1_0h	WT_0h
AT5G27300	pentatricopeptide (PPR) repeat-containing protein;(source:Araport11)	NA	IR	AT5G27300_c1	AT5G27300_P1	gun1_0h	WT_0h
AT5G27300	pentatricopeptide (PPR) repeat-containing protein;(source:Araport11)	NA	MES	AT5G27300_c1	AT5G27300_P1	gun1_0h	WT_0h
AT5G27300	pentatricopeptide (PPR) repeat-containing protein;(source:Araport11)	NA	MES	AT5G27300_c4	AT5G27300_P1	gun1_0h	WT_0h
AT5G27300	pentatricopeptide (PPR) repeat-containing protein;(source:Araport11)	NA	MES	AT5G27300_JS14	AT5G27300_P1	gun1_0h	WT_0h
AT5G35450	Disease resistance protein (CC-NBS-LRR class) family;(source:Araport11)	NA	A5	AT5G35450_P1	AT5G35450_ID2	gun1_0h	WT_0h
AT5G35450	Disease resistance protein (CC-NBS-LRR class) family;(source:Araport11)	NA	A5	AT5G35450_P1	AT5G35450_JS7	gun1_0h	WT_0h
AT5G35450	Disease resistance protein (CC-NBS-LRR class) family;(source:Araport11)	NA	IR	AT5G35450_P1	AT5G35450_JS7	gun1_0h	WT_0h
AT5G35738	pseudogene of zinc-dependent activator protein-1;(source:Araport11)	NA	A3	AT5G35738_JS1	AT5G35738_JC4	gun1_0h	WT_0h
AT5G35738	pseudogene of zinc-dependent activator protein-1;(source:Araport11)	NA	A5	AT5G35738_JS1	AT5G35738_JC4	gun1_0h	WT_0h
AT5G37510	Encodes a subunit of the 400 kDa subcomplex of the mitochondrial NADH dehydrogenase (complex I). The protein has been isolated in the male gametophyte. The mRNA is cell-to-cell mobile.	CI76,EMB1467	A3	AT5G37510_P1	AT5G37510_ID3	gun1_0h	WT_0h
AT5G37510	Encodes a subunit of the 400 kDa subcomplex of the mitochondrial NADH dehydrogenase (complex I). The protein has been isolated in the male gametophyte. The mRNA is cell-to-cell mobile.	CI76,EMB1467	A5	AT5G37510_P1	AT5G37510_ID3	gun1_0h	WT_0h
AT5G37510	Encodes a subunit of the 400 kDa subcomplex of the mitochondrial NADH dehydrogenase (complex I). The protein has been isolated in the male gametophyte. The mRNA is cell-to-cell mobile.	CI76,EMB1467	MES	AT5G37510_P1	AT5G37510_ID3	gun1_0h	WT_0h
AT5G38340	Disease resistance protein (TIR-NBS-LRR class) family;(source:Araport11)	NA	IR	AT5G38340_P1	AT5G38340_P2	gun1_0h	WT_0h
AT5G38510	Rhomboid-related intramembrane serine protease family protein;(source:Araport11)	NA	IR	AT5G38510_s1	AT5G38510_JS4	gun1_0h	WT_0h
AT5G38510	Rhomboid-related intramembrane serine protease family protein;(source:Araport11)	NA	A5	AT5G38510_s1	AT5G38510_P1	gun1_0h	WT_0h
AT5G38510	Rhomboid-related intramembrane serine protease family protein;(source:Araport11)	NA	IR	AT5G38510_s1	AT5G38510_P1	gun1_0h	WT_0h
AT5G38510	Rhomboid-related intramembrane serine protease family protein;(source:Araport11)	NA	A5	AT5G38510_s1	AT5G38510_s2	gun1_0h	WT_0h
AT5G38510	Rhomboid-related intramembrane serine protease family protein;(source:Araport11)	NA	IR	AT5G38510_s1	AT5G38510_s2	gun1_0h	WT_0h
AT5G38600	Proline-rich spliceosome-associated (PSP) family protein / zinc knuckle (CCHC-type) family protein;(source:Araport11)	NA	A5	AT5G38600_P1	AT5G38600_P3	gun1_0h	WT_0h
AT5G38600	Proline-rich spliceosome-associated (PSP) family protein / zinc knuckle (CCHC-type) family protein;(source:Araport11)	NA	IR	AT5G38600_P1	AT5G38600_P3	gun1_0h	WT_0h
AT5G38970	Encodes a polypeptide involved in the C-6 oxidation of brassinosteroids. Heterologous expression of the protein in yeast conferred the ability to catalyze multiple reactions in which the C-6 position of 6-deoxocastasterone, 6-deoxotyphasterol, 3-dehydro-6-deoxoteasterone and 6-deoxoteasterone are oxidized.	ATBR6OX,BR6OX,BR6OX1,CYP85A1	IR	AT5G38970_P2	AT5G38970_P1	gun1_0h	WT_0h
AT5G39340	Encodes AHP3, one of the six Arabidopsis thaliana histidine phosphotransfer proteins (AHPs) involved in Histidine (His)-to-Aspartate (Asp) phosphorelay signal transduction. AHPs function as redundant positive regulators of cytokinin signaling. Members of the AHP gene family include: AT3G21510 (AHP1), AT3G29350 (AHP2), AT5G39340 (AHP3), AT3G16360 (AHP4), AT1G03430 (AHP5) and AT1G80100 (AHP6).	AHP3,ATHP2	IR	AT5G39340_P4	AT5G39340_c1	gun1_0h	WT_0h
AT5G39360	EID1-like 2;(source:Araport11)	EDL2	IR	AT5G39360_ID2	AT5G39360.1	gun1_0h	WT_0h
AT5G40440	Encodes a mitogen-activated protein kinase kinase. Activates MPK8 and is a target of MPKKK20. Mutant root growth is sensitive oryzalin and suggestive of a role in signaling during microtubule organization.	ATMKK3,MKK3	A3	AT5G40440_P6	AT5G40440_P5	gun1_0h	WT_0h
AT5G40440	Encodes a mitogen-activated protein kinase kinase. Activates MPK8 and is a target of MPKKK20. Mutant root growth is sensitive oryzalin and suggestive of a role in signaling during microtubule organization.	ATMKK3,MKK3	IR	AT5G40440_P6	AT5G40440_P5	gun1_0h	WT_0h
AT5G40550	SGF29 tudor-like domain-containing protein;(source:Araport11)	AtSGF29b,SGF29b	A3	AT5G40550_P4	AT5G40550_P1	gun1_0h	WT_0h
AT5G40550	SGF29 tudor-like domain-containing protein;(source:Araport11)	AtSGF29b,SGF29b	IR	AT5G40550_P4	AT5G40550_P1	gun1_0h	WT_0h
AT5G40550	SGF29 tudor-like domain-containing protein;(source:Araport11)	AtSGF29b,SGF29b	A3	AT5G40550_P4	AT5G40550_P3	gun1_0h	WT_0h
AT5G41220	Encodes glutathione transferase belonging to the theta class of GSTs. Naming convention according to Wagner et al. (2002).	ATGSTT3,GST10C,GSTT3	IR	AT5G41220_P1	AT5G41220_ID4	gun1_0h	WT_0h
AT5G41880	DNA primase POLA3;(source:Araport11)	POLA3,POLA4	A3	AT5G41880_P1	AT5G41880_c1	gun1_0h	WT_0h
AT5G44560	SNF7 family protein;(source:Araport11)	VPS2.2	A3	AT5G44560_P1	AT5G44560_c2	gun1_0h	WT_0h
AT5G44560	SNF7 family protein;(source:Araport11)	VPS2.2	IR	AT5G44560_P1	AT5G44560_c2	gun1_0h	WT_0h
AT5G45010	Member of the intrinsically disordered protein family, interacts with different protein partners forming complexes involved in diverse biological mechanisms such as DNA repair, regulation of protein homeostasis, mRNA export. Role in the post-translational protein modification named DSSylation. Involved in molecular mechanisms underlying plant abiotic stress responses.	ATDSS1(V),DSS1(V)	IR	AT5G45010_c1	AT5G45010.1	gun1_0h	WT_0h
AT5G45190	Encodes a cyclin T partner CYCT1;5. Plays important roles in infection with Cauliflower mosaic virus (CaMV).	NA	IR	AT5G45190_P1	AT5G45190_ID20	gun1_0h	WT_0h
AT5G45260	Confers resistance to Ralstonia solanacearum. Similar to NBLS-TIR resistance genes,and also contains similarity to transcription factors. Interacts with pathogen effector protein AvrPop2.	ATWRKY52,RRS1,RRS1-R,SLH1	IR	AT5G45260_P1	AT5G45260_P2	gun1_0h	WT_0h
AT5G45590	Ribosomal protein L35;(source:Araport11)	NA	IR	AT5G45590_P1	AT5G45590_JS1	gun1_0h	WT_0h
AT5G45760	Transducin/WD40 repeat-like superfamily protein;(source:Araport11)	NA	A3	AT5G45760_ID10	AT5G45760_c2	gun1_0h	WT_0h
AT5G45760	Transducin/WD40 repeat-like superfamily protein;(source:Araport11)	NA	IR	AT5G45760_ID10	AT5G45760_c2	gun1_0h	WT_0h
AT5G45760	Transducin/WD40 repeat-like superfamily protein;(source:Araport11)	NA	A3	AT5G45760_P1	AT5G45760_c3	gun1_0h	WT_0h
AT5G45760	Transducin/WD40 repeat-like superfamily protein;(source:Araport11)	NA	IR	AT5G45760_P1	AT5G45760_c3	gun1_0h	WT_0h
AT5G46390	C-terminal peptidase	NA	IR	AT5G46390_ID16	AT5G46390.1	gun1_0h	WT_0h
AT5G46390	C-terminal peptidase	NA	A5	AT5G46390_ID16	AT5G46390_P2	gun1_0h	WT_0h
AT5G47180	Plant VAMP (vesicle-associated membrane protein) family protein;(source:Araport11)	NA	IR	AT5G47180_P2	AT5G47180_P1	gun1_0h	WT_0h
AT5G47430	DWNN domain, a CCHC-type zinc finger;(source:Araport11)	NA	IR	AT5G47430_P1	AT5G47430_P4	gun1_0h	WT_0h
AT5G47430	DWNN domain, a CCHC-type zinc finger;(source:Araport11)	NA	IR	AT5G47430_P5	AT5G47430_P4	gun1_0h	WT_0h
AT5G47480	RGPR-related protein; SEC16A homolog. Part of endomembrane trafficking system.	MAG5	IR	AT5G47480_P1	AT5G47480_P2	gun1_0h	WT_0h
AT5G47490	RGPR-like protein;(source:Araport11)	NA	A3	AT5G47490_P3	AT5G47490_s2	gun1_0h	WT_0h
AT5G47490	RGPR-like protein;(source:Araport11)	NA	A5	AT5G47490_P3	AT5G47490_s2	gun1_0h	WT_0h
AT5G48220	Aldolase-type TIM barrel family protein;(source:Araport11)	NA	ES	AT5G48220.1	AT5G48220_P2	gun1_0h	WT_0h
AT5G48220	Aldolase-type TIM barrel family protein;(source:Araport11)	NA	IR	AT5G48220.1	AT5G48220_P2	gun1_0h	WT_0h
AT5G48330	Regulator of chromosome condensation (RCC1) family protein;(source:Araport11)	RUG2	A3	AT5G48330.1	AT5G48330_P2	gun1_0h	WT_0h
AT5G48600	member of SMC subfamily	ATCAP-C,ATSMC3,ATSMC4,SMC3	IR	AT5G48600_P2	AT5G48600_s1	gun1_0h	WT_0h
AT5G49720	Encodes a membrane-bound endo-1,4-beta-D-glucanase, involved in cellulose biosynthesis. Loss-of-function mutants have severe cellulose-deficient phenotypes. During cell elongation, KOR1 is associated with Golgi apparatus and early endosome. Inhibition of cellulose biosynthesis promoted a redistribution of KOR1 in subcellular locations. These observations suggest that deposition of cellulose invol…	ATGH9A1,DEC,GH9A1,IRX2,KOR,KOR1,RSW2,TSD1	A3	AT5G49720_P1	AT5G49720_c1	gun1_0h	WT_0h
AT5G49720	Encodes a membrane-bound endo-1,4-beta-D-glucanase, involved in cellulose biosynthesis. Loss-of-function mutants have severe cellulose-deficient phenotypes. During cell elongation, KOR1 is associated with Golgi apparatus and early endosome. Inhibition of cellulose biosynthesis promoted a redistribution of KOR1 in subcellular locations. These observations suggest that deposition of cellulose invol…	ATGH9A1,DEC,GH9A1,IRX2,KOR,KOR1,RSW2,TSD1	A5	AT5G49720_P1	AT5G49720_c1	gun1_0h	WT_0h
AT5G50010	transcription factor bHLH145;(source:Araport11)	SACL2	A3	AT5G50010.1	AT5G50010_s2	gun1_0h	WT_0h
AT5G50020	DHHC-type zinc finger family protein;(source:Araport11)	NA	IR	AT5G50020_P3	AT5G50020_ID12	gun1_0h	WT_0h
AT5G50020	DHHC-type zinc finger family protein;(source:Araport11)	NA	IR	AT5G50020_P3	AT5G50020_P2	gun1_0h	WT_0h
AT5G51730	RNA-binding (RRM/RBD/RNP motifs) family protein;(source:Araport11)	NA	A5	AT5G51730_ID3	AT5G51730_JC7	gun1_0h	WT_0h
AT5G51730	RNA-binding (RRM/RBD/RNP motifs) family protein;(source:Araport11)	NA	IR	AT5G51730_ID3	AT5G51730_JC7	gun1_0h	WT_0h
AT5G51730	RNA-binding (RRM/RBD/RNP motifs) family protein;(source:Araport11)	NA	IR	AT5G51730_ID3	AT5G51730_P1	gun1_0h	WT_0h
AT5G51970	Encodes a sorbitol dehydrogenase that exhibits greatest oxidative activity with sorbitol, ribitol and xylitol as substrates. SDH can be thiolated in vitro.	ATSDH	IR	AT5G51970.1	AT5G51970_ID7	gun1_0h	WT_0h
AT5G52200	Encodes an inhibitor of protein phosphatase one (PP1).	AtI-2,I-2	A5	AT5G52200_P1	AT5G52200_P3	gun1_0h	WT_0h
AT5G53010	calcium-transporting ATPase;(source:Araport11)	NA	A3	AT5G53010_JC115	AT5G53010_JC272	gun1_0h	WT_0h
AT5G53340	Encodes a hydroxyproline O-galactosyltransferase.	HPGT1	A3	AT5G53340.1	AT5G53340_s1	gun1_0h	WT_0h
AT5G53420	Member of ASML2 family of CCT domain proteins.There is a preferential accumulation of RNA isoforms CCT101.1 and CCT101.2 in response to N-treatment, each isoform has different targets.	NA	A3	AT5G53420_P1	AT5G53420_ID4	gun1_0h	WT_0h
AT5G53420	Member of ASML2 family of CCT domain proteins.There is a preferential accumulation of RNA isoforms CCT101.1 and CCT101.2 in response to N-treatment, each isoform has different targets.	NA	IR	AT5G53420_P1	AT5G53420_ID4	gun1_0h	WT_0h
AT5G53460	NADH-dependent glutamate synthase The mRNA is cell-to-cell mobile.	GLT1	A3	AT5G53460_P1	AT5G53460.2	gun1_0h	WT_0h
AT5G53460	NADH-dependent glutamate synthase The mRNA is cell-to-cell mobile.	GLT1	IR	AT5G53460_P1	AT5G53460.2	gun1_0h	WT_0h
AT5G53860	Encodes a plant-specific protein with a domain similar to the central cysteine-rich domain of DnaJ proteins. It is involved in chloroplast and leaf development.	ANU7,EMB2737,EMB64	A3	AT5G53860.3	AT5G53860.2	gun1_0h	WT_0h
AT5G53860	Encodes a plant-specific protein with a domain similar to the central cysteine-rich domain of DnaJ proteins. It is involved in chloroplast and leaf development.	ANU7,EMB2737,EMB64	A5	AT5G53860.3	AT5G53860.2	gun1_0h	WT_0h
AT5G53860	Encodes a plant-specific protein with a domain similar to the central cysteine-rich domain of DnaJ proteins. It is involved in chloroplast and leaf development.	ANU7,EMB2737,EMB64	ES	AT5G53860.3	AT5G53860.2	gun1_0h	WT_0h
AT5G54520	Transducin/WD40 repeat-like superfamily protein;(source:Araport11)	NA	A3	AT5G54520_P1	AT5G54520_JS2	gun1_0h	WT_0h
AT5G54520	Transducin/WD40 repeat-like superfamily protein;(source:Araport11)	NA	IR	AT5G54520_P1	AT5G54520_JS2	gun1_0h	WT_0h
AT5G55100	SWAP (Suppressor-of-White-APricot)/surp domain-containing protein;(source:Araport11)	NA	IR	AT5G55100_P6	AT5G55100_P3	gun1_0h	WT_0h
AT5G55100	SWAP (Suppressor-of-White-APricot)/surp domain-containing protein;(source:Araport11)	NA	IR	AT5G55100_P6	AT5G55100_P8	gun1_0h	WT_0h
AT5G55500	Encodes a beta-1,2-xylosyltransferase that is glycosylated at two positions. The mRNA is cell-to-cell mobile.	ATXYLT,XYLT	IR	AT5G55500_P1	AT5G55500_c1	gun1_0h	WT_0h
AT5G55560	Protein kinase superfamily protein;(source:Araport11)	NA	A3	AT5G55560_c1	AT5G55560_P1	gun1_0h	WT_0h
AT5G55580	Encodes a mitochondrial transcription termination factor (mTERF) family protein. The gene product is targeted to the chloroplast nucleoid and mutants are affected in plastid gene expression and chloroplast development. Mutants, named as twirt1 (twr-1), display altered root meristem function resulting in short roots. Mutation also affects shoot meristem function.	mTERF9	IR	AT5G55580_ID5	AT5G55580_ID6	gun1_0h	WT_0h
AT5G55896	transposable_element_gene;(source:Araport11);non-LTR retrotransposon family (LINE), has a 1.7e-49 P-value blast match to GB:NP_038603 L1 repeat, Tf subfamily, member 23 (LINE-element) (Mus musculus);(source:TAIR10)	NA	ES	AT5G55896_s2	AT5G55896_s5	gun1_0h	WT_0h
AT5G56240	hapless protein;(source:Araport11)	NA	A5	AT5G56240.1	AT5G56240_s2	gun1_0h	WT_0h
AT5G56240	hapless protein;(source:Araport11)	NA	IR	AT5G56240.1	AT5G56240_s2	gun1_0h	WT_0h
AT5G57180	Transcription regulator responsible for specific upregulation of the translocon genes atToc33 and atToc75 in leaves. Involved in protein import into chloroplast.	CIA2	IR	AT5G57180_P1	AT5G57180_P2	gun1_0h	WT_0h
AT5G57565	Protein kinase superfamily protein;(source:Araport11)	NA	A5	AT5G57565_P3	AT5G57565_P4	gun1_0h	WT_0h
AT5G57565	Protein kinase superfamily protein;(source:Araport11)	NA	IR	AT5G57565_P3	AT5G57565_P4	gun1_0h	WT_0h
AT5G57565	Protein kinase superfamily protein;(source:Araport11)	NA	A5	AT5G57565_P3	AT5G57565_P6	gun1_0h	WT_0h
AT5G57655	xylose isomerase family protein;(source:Araport11)	NA	IR	AT5G57655_P2	AT5G57655.1	gun1_0h	WT_0h
AT5G58300	Leucine-rich repeat protein kinase family protein;(source:Araport11)	NA	A3	AT5G58300_c3	AT5G58300_s2	gun1_0h	WT_0h
AT5G58300	Leucine-rich repeat protein kinase family protein;(source:Araport11)	NA	A5	AT5G58300_c3	AT5G58300_s2	gun1_0h	WT_0h
AT5G58300	Leucine-rich repeat protein kinase family protein;(source:Araport11)	NA	IR	AT5G58300_c3	AT5G58300_s2	gun1_0h	WT_0h
AT5G58440	sorting nexin 2A;(source:Araport11)	SNX2a	IR	AT5G58440_ID13	AT5G58440_JS1	gun1_0h	WT_0h
AT5G58510	Rab3 GTPase-activating protein catalytic protein;(source:Araport11)	NA	A3	AT5G58510_JS13	AT5G58510_ID128	gun1_0h	WT_0h
AT5G58510	Rab3 GTPase-activating protein catalytic protein;(source:Araport11)	NA	A5	AT5G58510_JS13	AT5G58510_ID128	gun1_0h	WT_0h
AT5G58510	Rab3 GTPase-activating protein catalytic protein;(source:Araport11)	NA	IR	AT5G58510_JS13	AT5G58510_ID128	gun1_0h	WT_0h
AT5G58720	smr (Small MutS Related) domain-containing protein;(source:Araport11)	NA	IR	AT5G58720.1	AT5G58720.2	gun1_0h	WT_0h
AT5G58720	smr (Small MutS Related) domain-containing protein;(source:Araport11)	NA	IR	AT5G58720.1	AT5G58720_ID16	gun1_0h	WT_0h
AT5G58960	Mutant plants display impaired light-regulation of the hypocotyl randomization response.	GIL1	IR	AT5G58960_P2	AT5G58960.1	gun1_0h	WT_0h
AT5G59750	monofunctional riboflavin biosynthesis protein RIBA 3;(source:Araport11)	AtRIBA3,RIBA3	IR	AT5G59750_P1	AT5G59750_P3	gun1_0h	WT_0h
AT5G59780	Encodes a putative transcription factor (MYB59). In roots it is involved in K+/NO3- transport and expression of the NPF7.3 transporter.	ATMYB59,ATMYB59-1,ATMYB59-2,ATMYB59-3,MYB59	IR	AT5G59780_P1	AT5G59780_ID1	gun1_0h	WT_0h
AT5G59910	Histone superfamily protein;(source:Araport11)	HTB4	IR	AT5G59910_P1	AT5G59910_c1	gun1_0h	WT_0h
AT5G59960	K-stimulated pyrophosphate-energized sodium pump protein;(source:Araport11)	NA	IR	AT5G59960_P1	AT5G59960_P3	gun1_0h	WT_0h
AT5G60640	Encodes a protein disulfide isomerase-like (PDIL) protein, a member of a multigene family within the thioredoxin (TRX) superfamily. Unlike several other PDI family members, transcript levels for this gene are not up-regulated in response to three different chemical inducers of ER stress (dithiothreitol, beta-mercaptoethanol, and tunicamycin). However, the level of transcripts for this gene is sli…	ATPDI2,ATPDIL1-4,PDI2,PDIL1-4	A3	AT5G60640_P1	AT5G60640.3	gun1_0h	WT_0h
AT5G60640	Encodes a protein disulfide isomerase-like (PDIL) protein, a member of a multigene family within the thioredoxin (TRX) superfamily. Unlike several other PDI family members, transcript levels for this gene are not up-regulated in response to three different chemical inducers of ER stress (dithiothreitol, beta-mercaptoethanol, and tunicamycin). However, the level of transcripts for this gene is sli…	ATPDI2,ATPDIL1-4,PDI2,PDIL1-4	MES	AT5G60640_P1	AT5G60640.3	gun1_0h	WT_0h
AT5G60980	Nuclear transport factor 2 (NTF2) family protein with RNA binding (RRM-RBD-RNP motifs) domain-containing protein;(source:Araport11)	NTF2	A3	AT5G60980_ID11	AT5G60980.2	gun1_0h	WT_0h
AT5G61030	Encodes a glycine-rich RNA binding protein that is involved in C-> U RNA editing in mitochondria. Gene expression is induced by cold. The mRNA is cell-to-cell mobile.	GR-RBP3,ORRM3,RBGA7	A3	AT5G61030_ID30	AT5G61030_ID24	gun1_0h	WT_0h
AT5G61030	Encodes a glycine-rich RNA binding protein that is involved in C-> U RNA editing in mitochondria. Gene expression is induced by cold. The mRNA is cell-to-cell mobile.	GR-RBP3,ORRM3,RBGA7	MES	AT5G61030_ID30	AT5G61030_ID24	gun1_0h	WT_0h
AT5G61830	NAD(P)-binding Rossmann-fold superfamily protein;(source:Araport11)	NA	A3	AT5G61830_ID6	AT5G61830_ID1	gun1_0h	WT_0h
AT5G61830	NAD(P)-binding Rossmann-fold superfamily protein;(source:Araport11)	NA	ES	AT5G61830_ID6	AT5G61830_ID1	gun1_0h	WT_0h
AT5G61830	NAD(P)-binding Rossmann-fold superfamily protein;(source:Araport11)	NA	IR	AT5G61830_ID6	AT5G61830_ID1	gun1_0h	WT_0h
AT5G61830	NAD(P)-binding Rossmann-fold superfamily protein;(source:Araport11)	NA	A3	AT5G61830_ID6	AT5G61830_ID2	gun1_0h	WT_0h
AT5G61830	NAD(P)-binding Rossmann-fold superfamily protein;(source:Araport11)	NA	IR	AT5G61830_ID6	AT5G61830_ID2	gun1_0h	WT_0h
AT5G62100	A member of Arabidopsis BAG (Bcl-2-associated athanogene) proteins, plant homologs of mammalian regulators of apoptosis. Plant BAG proteins are multi-functional and remarkably similar to their animal counterparts, as they regulate apoptotic-like processes ranging from pathogen attack, to abiotic stress, to plant development.	ATBAG2,BAG2	A3	AT5G62100_P6	AT5G62100_JS1	gun1_0h	WT_0h
AT5G62100	A member of Arabidopsis BAG (Bcl-2-associated athanogene) proteins, plant homologs of mammalian regulators of apoptosis. Plant BAG proteins are multi-functional and remarkably similar to their animal counterparts, as they regulate apoptotic-like processes ranging from pathogen attack, to abiotic stress, to plant development.	ATBAG2,BAG2	A3	AT5G62100_P6	AT5G62100_P3	gun1_0h	WT_0h
AT5G62100	A member of Arabidopsis BAG (Bcl-2-associated athanogene) proteins, plant homologs of mammalian regulators of apoptosis. Plant BAG proteins are multi-functional and remarkably similar to their animal counterparts, as they regulate apoptotic-like processes ranging from pathogen attack, to abiotic stress, to plant development.	ATBAG2,BAG2	IR	AT5G62100_P6	AT5G62100_P3	gun1_0h	WT_0h
AT5G62290	nucleotide-sensitive chloride conductance regulator (ICln) family protein;(source:Araport11)	NA	A3	AT5G62290_P1	AT5G62290.2	gun1_0h	WT_0h
AT5G62460	RZFP is a zinc finger protein involved in mediating abiotic stress tolerance.	RZFP	IR	AT5G62460_P1	AT5G62460_P2	gun1_0h	WT_0h
AT5G63080	Encodes a HR demethylase that acts as a positive regulator of seed germination in the PHYB-PIL5-SOM pathway.	JMJ20	A5	AT5G63080_c1	AT5G63080_P1	gun1_0h	WT_0h
AT5G63490	CBS / octicosapeptide/Phox/Bemp1 (PB1) domains-containing protein;(source:Araport11)	NA	A5	AT5G63490_ID14	AT5G63490_P1	gun1_0h	WT_0h
AT5G63490	CBS / octicosapeptide/Phox/Bemp1 (PB1) domains-containing protein;(source:Araport11)	NA	IR	AT5G63490_ID14	AT5G63490_P1	gun1_0h	WT_0h
AT5G63520	F-box/LRR protein;(source:Araport11)	NA	A3	AT5G63520_JS1	AT5G63520_s1	gun1_0h	WT_0h
AT5G63520	F-box/LRR protein;(source:Araport11)	NA	IR	AT5G63520_JS1	AT5G63520_s1	gun1_0h	WT_0h
AT5G63710	Leucine-rich repeat protein kinase family protein;(source:Araport11)	NA	IR	AT5G63710_ID3	AT5G63710_P1	gun1_0h	WT_0h
AT5G64200	encodes an SC35-like splicing factor of 35 kD localized to the nuclear specks.	At-SC35,ATSC35,SC35	IR	AT5G64200.1	AT5G64200.2	gun1_0h	WT_0h
AT5G64460	Phosphoglycerate mutase family protein;(source:Araport11)	NA	A3	AT5G64460_ID55	AT5G64460_P2	gun1_0h	WT_0h
AT5G64460	Phosphoglycerate mutase family protein;(source:Araport11)	NA	A5	AT5G64460_ID55	AT5G64460_P2	gun1_0h	WT_0h
AT5G65210	Encodes TGA1, a redox-controlled regulator of systemic acquired resistance. TGA1 targets the activation sequence-1 (as-1) element of the promoter region of defense proteins. TGA1 are S-nitrosylated.	TGA1	IR	AT5G65210_P1	AT5G65210_P2	gun1_0h	WT_0h
AT5G65310	Encodes a class I HDZip (homeodomain-leucine zipper) protein that is a positive regulator of ABA-responsiveness, mediating the inhibitory effect of ABA on growth during seedling establishment.	ATHB-5,ATHB5,HB5	A3	AT5G65310_P1	AT5G65310_c1	gun1_0h	WT_0h
AT5G66190	Encodes a leaf-type ferredoxin:NADP(H) oxidoreductase. It is present in both chloroplast stroma and thylakoid membranes but is more abundant in the thylakoid. The affinity of this enzyme for ferredoxin is slightly, but significantly, higher than AtLFNR2, an isoform of the same enzyme. AtLFNR1 forms a heterodimer with AtFNR2 and is also a prerequisite to attach AtFNR2 to the thylakoid membrane.	ATLFNR1,FNR1,LFNR1	A5	AT5G66190.1	AT5G66190_ID15	gun1_0h	WT_0h

## Sheet: WT_3h_vs_gun1_3h
GeneID	Description	Aliases	Mechanism	Isoform1	Isoform2	Time1	Time2
AT1G01220	Encodes a bifunctional enzyme that has both L-fucokinase and GDP-L-fucose pyrophosphorylase activities. It catalyzes the two steps of the L-fucose salvage pathway for the generation of activated GDP-L-fucose. This pathway seems to be of minor importance for cell wall polysaccharide biosynthesis compared to the de novo GDP-L-fucose biosynthesis pathway in Arabidopsis.	AtFKGP,FKGP	A5	AT1G01220_P7	AT1G01220_P1	gun1_3h	WT_3h
AT1G01220	Encodes a bifunctional enzyme that has both L-fucokinase and GDP-L-fucose pyrophosphorylase activities. It catalyzes the two steps of the L-fucose salvage pathway for the generation of activated GDP-L-fucose. This pathway seems to be of minor importance for cell wall polysaccharide biosynthesis compared to the de novo GDP-L-fucose biosynthesis pathway in Arabidopsis.	AtFKGP,FKGP	IR	AT1G01220_P7	AT1G01220_P1	gun1_3h	WT_3h
AT1G01550	Encodes a protein with no functionally characterized domains that to prevent the synthesis of a novel substance that moves from the root to the shoot, where it modifies shoot growth by interfering with auxin signaling. Synthesis and delivery of this substance requires neither phloem nor endodermis.	BPS1	ES	AT1G01550_P1	AT1G01550_JS1	gun1_3h	WT_3h
AT1G01740	kinase with tetratricopeptide repeat domain-containing protein;(source:Araport11)	BSK4	A3	AT1G01740_P3	AT1G01740_P4	gun1_3h	WT_3h
AT1G01740	kinase with tetratricopeptide repeat domain-containing protein;(source:Araport11)	BSK4	A3	AT1G01740_P3	AT1G01740_P5	gun1_3h	WT_3h
AT1G01740	kinase with tetratricopeptide repeat domain-containing protein;(source:Araport11)	BSK4	A5	AT1G01740_P3	AT1G01740_P5	gun1_3h	WT_3h
AT1G02300	Encodes a capase involved in stress induced cell death.	AtcathB1	ES	AT1G02300_s2	AT1G02300_ID10	gun1_3h	WT_3h
AT1G02300	Encodes a capase involved in stress induced cell death.	AtcathB1	IR	AT1G02300_s2	AT1G02300_ID10	gun1_3h	WT_3h
AT1G02300	Encodes a capase involved in stress induced cell death.	AtcathB1	A3	AT1G02300_s2	AT1G02300_s1	gun1_3h	WT_3h
AT1G02300	Encodes a capase involved in stress induced cell death.	AtcathB1	IR	AT1G02300_s2	AT1G02300_s1	gun1_3h	WT_3h
AT1G03000	Encodes an apparent ATPase similar to yeast and human protein required for peroxisomal biogenesis. May facilitate recycling of PEX5, the peroxisomal matrix protein receptor, and thereby promote peroxisomal matrix protein import.	PEX6	A5	AT1G03000_JS8	AT1G03000_ID4	gun1_3h	WT_3h
AT1G03000	Encodes an apparent ATPase similar to yeast and human protein required for peroxisomal biogenesis. May facilitate recycling of PEX5, the peroxisomal matrix protein receptor, and thereby promote peroxisomal matrix protein import.	PEX6	IR	AT1G03000_JS8	AT1G03000_ID4	gun1_3h	WT_3h
AT1G03000	Encodes an apparent ATPase similar to yeast and human protein required for peroxisomal biogenesis. May facilitate recycling of PEX5, the peroxisomal matrix protein receptor, and thereby promote peroxisomal matrix protein import.	PEX6	A5	AT1G03000_JS8	AT1G03000_s2	gun1_3h	WT_3h
AT1G03000	Encodes an apparent ATPase similar to yeast and human protein required for peroxisomal biogenesis. May facilitate recycling of PEX5, the peroxisomal matrix protein receptor, and thereby promote peroxisomal matrix protein import.	PEX6	IR	AT1G03000_JS8	AT1G03000_s2	gun1_3h	WT_3h
AT1G03370	C2 calcium/lipid-binding and GRAM domain containing protein;(source:Araport11)	NA	IR	AT1G03370_P1	AT1G03370_P2	gun1_3h	WT_3h
AT1G04550	IAA12/BDL plays a role in auxin-mediated processes of apical-basal patterning in the embryo. bdl mutants lack a primary root meristem	BDL,IAA12	A3	AT1G04550.1	AT1G04550_ID7	gun1_3h	WT_3h
AT1G04550	IAA12/BDL plays a role in auxin-mediated processes of apical-basal patterning in the embryo. bdl mutants lack a primary root meristem	BDL,IAA12	IR	AT1G04550_P2	AT1G04550_ID7	gun1_3h	WT_3h
AT1G04550	IAA12/BDL plays a role in auxin-mediated processes of apical-basal patterning in the embryo. bdl mutants lack a primary root meristem	BDL,IAA12	IR	AT1G04550.1	AT1G04550_ID7	gun1_3h	WT_3h
AT1G05385	Encodes a Psb27 homolog involved in photosystem II biogenesis.	LPA19,Psb27-H1	IR	AT1G05385_ID2	AT1G05385_P1	gun1_3h	WT_3h
AT1G05620	Encodes a cytosolic inosine nucleoside hydrolase. It forms a heterocomplex with NSH1 with almost two orders of magnitude higher catalytic efficiency for xanthosine hydrolysis than observed for NSH1 alone. Transcript levels for this gene are elevated in older leaves suggesting that it may play a role in purine catabolism during senescence.	NSH2,URH2	IR	AT1G05620_P1	AT1G05620_JS1	gun1_3h	WT_3h
AT1G05785	Got1/Sft2-like vescicle transport protein family;(source:Araport11)	NA	A3	AT1G05785_P1	AT1G05785_P6	gun1_3h	WT_3h
AT1G05785	Got1/Sft2-like vescicle transport protein family;(source:Araport11)	NA	IR	AT1G05785_P1	AT1G05785_P6	gun1_3h	WT_3h
AT1G06190	Encodes a novel ribonucleic acid-binding protein that interacts with the endonuclease RNase E and supports its function in processing plastid ribonucleic acids.	RHON1	IR	AT1G06190_P1	AT1G06190.2	gun1_3h	WT_3h
AT1G06960	Similar to U2B'. Functions in cold stress induced alternative splicing.	U2BL	IR	AT1G06960_P1	AT1G06960_P2	gun1_3h	WT_3h
AT1G07820	Histone superfamily protein;(source:Araport11)	NA	IR	AT1G07820_ID1	AT1G07820.2	gun1_3h	WT_3h
AT1G07840	Sas10/Utp3/C1D family;(source:Araport11)	NA	IR	AT1G07840.3	AT1G07840.1	gun1_3h	WT_3h
AT1G08060	Encodes a transcriptional silencer that is required for proper expression of PRR/NLR immune receptor genes.	MOM,MOM,MOM1	A3	AT1G08060_P3	AT1G08060_P1	gun1_3h	WT_3h
AT1G08210	Eukaryotic aspartyl protease family protein;(source:Araport11)	NA	IR	AT1G08210_s1	AT1G08210_P3	gun1_3h	WT_3h
AT1G09890	Rhamnogalacturonate lyase family protein;(source:Araport11)	NA	A3	AT1G09890_JS1	AT1G09890_P3	gun1_3h	WT_3h
AT1G09890	Rhamnogalacturonate lyase family protein;(source:Araport11)	NA	IR	AT1G09890_JS1	AT1G09890_P3	gun1_3h	WT_3h
AT1G09890	Rhamnogalacturonate lyase family protein;(source:Araport11)	NA	A3	AT1G09890_JS1	AT1G09890_P4	gun1_3h	WT_3h
AT1G10870	A member of ARF GAP domain (AGD), A thaliana has 15 members, grouped into four classes. AGD4 belongs to the Class 1, together with AGD1, AGD2, and AGD3.	AGD4	A3	AT1G10870_P2	AT1G10870_P1	gun1_3h	WT_3h
AT1G11090	alpha/beta-Hydrolases superfamily protein;(source:Araport11)	MAGL1	IR	AT1G11090.1	AT1G11090_ID2	gun1_3h	WT_3h
AT1G11870	Seryl-tRNA synthetase targeted to chloroplasts and mitochondria. Its inactivation causes developmental arrest of chloroplasts and mitochondria in Nicotiana benthamiana.	ATSRS,OVA7,SRS	A3	AT1G11870_c2	AT1G11870.2	gun1_3h	WT_3h
AT1G12220	Resistance gene, mediates resistance against the bacterial pathogen Pseudomonas syringae. Contains a putative nucleotide binding site composed of kinase-1a (or P-loop), kinase-2a, and putative kinase-3a domains, 13 imperfect leucine-rich repeats, a potential leucine zipper, and two uncharacterized motifs that are well conserved in products of previously isolated R genes. Confers resistance to Pse…	RPS5	A3	AT1G12220_P2	AT1G12220_P1	gun1_3h	WT_3h
AT1G12220	Resistance gene, mediates resistance against the bacterial pathogen Pseudomonas syringae. Contains a putative nucleotide binding site composed of kinase-1a (or P-loop), kinase-2a, and putative kinase-3a domains, 13 imperfect leucine-rich repeats, a potential leucine zipper, and two uncharacterized motifs that are well conserved in products of previously isolated R genes. Confers resistance to Pse…	RPS5	IR	AT1G12220_P2	AT1G12220_P1	gun1_3h	WT_3h
AT1G12350	At1g12350 encodes phosphopantothenoylcysteine synthetase (phosphopantothenoylcysteine ligase). Its molecular function was shown to add cysteine forming (R)-4?-phospho-N-pantothenoylcysteine (PPC)	ATCOAB,COAB	A5	AT1G12350_ID22	AT1G12350_ID6	gun1_3h	WT_3h
AT1G13060	Encodes 20S proteasome beta subunit PBE1 (PBE1).	PBE1	A5	AT1G13060_P1	AT1G13060_ID64	gun1_3h	WT_3h
AT1G13060	Encodes 20S proteasome beta subunit PBE1 (PBE1).	PBE1	MES	AT1G13060_P1	AT1G13060_ID64	gun1_3h	WT_3h
AT1G13630	Tetratricopeptide repeat (TPR)-like superfamily protein;(source:Araport11)	NA	IR	AT1G13630_P6	AT1G13630_P2	gun1_3h	WT_3h
AT1G14120	DAO2 is an IAA oxidase expressed in root caps. it is a member of a family of dioxygenase and 2OG Fe(II) oxygenase domain and DAO domain containing proteins. It is expressed specifically in root cap cells and does not appear to be the major IAA oxidase in planta.	AtDAO2	A3	AT1G14120_c1	AT1G14120_c2	gun1_3h	WT_3h
AT1G14150	Encodes a subunit of the NAD(P)H dehydrogenase complex located in the chloroplast thylakoid lumen.	PnsL2,PQL1,PQL2	A5	AT1G14150.1	AT1G14150_c1	gun1_3h	WT_3h
AT1G15380	Glyoxalase which affects ABA?JA crosstalk.	GLYI4	A5	AT1G15380_P1	AT1G15380_JC1	gun1_3h	WT_3h
AT1G15380	Glyoxalase which affects ABA?JA crosstalk.	GLYI4	IR	AT1G15380_P1	AT1G15380_JC1	gun1_3h	WT_3h
AT1G15660	Encodes a homologue of the human centromeric protein C (CENP-C). CENP-C co-localizes with the 180 bp centromeric regions of chromosomes throughout the cell cycle, but does not completely cover the 180 bp regions.	CENP-C,CENP-C	A3	AT1G15660_s1	AT1G15660_P1	gun1_3h	WT_3h
AT1G15690	Encodes a H(+)-translocating (pyrophosphate-energized) inorganic pyrophosphatase (H(+)-PPase; EC 3.6.1.1) located in the vacuolar membrane. Expression is found in all tissues examined, including meristems and floral organ primordium. Expression is particularly enhanced in pollen, and is repressed by light. Over expression and loss of function phenotypes suggest AVP1 is involved in regulation of a…	AtAVP1,ATAVP3,AtVHP1,AVP-3,AVP1,FUGU5,VHP1	A3	AT1G15690_ID11	AT1G15690.2	gun1_3h	WT_3h
AT1G15690	Encodes a H(+)-translocating (pyrophosphate-energized) inorganic pyrophosphatase (H(+)-PPase; EC 3.6.1.1) located in the vacuolar membrane. Expression is found in all tissues examined, including meristems and floral organ primordium. Expression is particularly enhanced in pollen, and is repressed by light. Over expression and loss of function phenotypes suggest AVP1 is involved in regulation of a…	AtAVP1,ATAVP3,AtVHP1,AVP-3,AVP1,FUGU5,VHP1	A5	AT1G15690_ID11	AT1G15690.2	gun1_3h	WT_3h
AT1G15690	Encodes a H(+)-translocating (pyrophosphate-energized) inorganic pyrophosphatase (H(+)-PPase; EC 3.6.1.1) located in the vacuolar membrane. Expression is found in all tissues examined, including meristems and floral organ primordium. Expression is particularly enhanced in pollen, and is repressed by light. Over expression and loss of function phenotypes suggest AVP1 is involved in regulation of a…	AtAVP1,ATAVP3,AtVHP1,AVP-3,AVP1,FUGU5,VHP1	ES	AT1G15690_ID11	AT1G15690.2	gun1_3h	WT_3h
AT1G15930	Ribosomal protein L7Ae/L30e/S12e/Gadd45 family protein;(source:Araport11)	NA	ES	AT1G15930_P2	AT1G15930_c1	gun1_3h	WT_3h
AT1G17410	Nucleoside diphosphate kinase family protein;(source:Araport11)	NA	A3	AT1G17410_c1	AT1G17410_c2	gun1_3h	WT_3h
AT1G17410	Nucleoside diphosphate kinase family protein;(source:Araport11)	NA	A5	AT1G17410_c1	AT1G17410_P3	gun1_3h	WT_3h
AT1G17410	Nucleoside diphosphate kinase family protein;(source:Araport11)	NA	IR	AT1G17410_c1	AT1G17410_P3	gun1_3h	WT_3h
AT1G18620	Member of a small gene family in Arabidopsis. Quadruple mutants in this family display defects in cell elongation.	LNG4,TRM3	A5	AT1G18620_JS1	AT1G18620_P3	gun1_3h	WT_3h
AT1G18620	Member of a small gene family in Arabidopsis. Quadruple mutants in this family display defects in cell elongation.	LNG4,TRM3	IR	AT1G18620_JS1	AT1G18620_P3	gun1_3h	WT_3h
AT1G18670	Encodes a cyclin-dependent kinase-like protein with a ser/thr protein kinase domain and an N-terminal myristoylation sequence. Mutants in this gene are unable to express female sterility in response to beta-aminobutyric acid, as wild type plants do.	IBS1	IR	AT1G18670_P2	AT1G18670_P1	gun1_3h	WT_3h
AT1G19000	Homeodomain-like superfamily protein;(source:Araport11)	NA	A3	AT1G19000_P2	AT1G19000_ID16	gun1_3h	WT_3h
AT1G19000	Homeodomain-like superfamily protein;(source:Araport11)	NA	A5	AT1G19000_P2	AT1G19000_ID16	gun1_3h	WT_3h
AT1G19350	Encodes brassinosteroid (BR) signalling protein that accumulates in the nucleus as dephosphorylated form in response to BRs. Is phosphorylated by the BIN2 GSK3 kinase. It synergistically interacts with BIM1 to bind to E box sequences (CANNTG). The protein contains a nuclear localization signal (NLS), followed by a highly conserved amino-terminal domain (N) shared by all family members, a BIN2 pho…	BES1,BZR2	A3	AT1G19350_ID4	AT1G19350.3	gun1_3h	WT_3h
AT1G19350	Encodes brassinosteroid (BR) signalling protein that accumulates in the nucleus as dephosphorylated form in response to BRs. Is phosphorylated by the BIN2 GSK3 kinase. It synergistically interacts with BIM1 to bind to E box sequences (CANNTG). The protein contains a nuclear localization signal (NLS), followed by a highly conserved amino-terminal domain (N) shared by all family members, a BIN2 pho…	BES1,BZR2	IR	AT1G19350_ID4	AT1G19350.3	gun1_3h	WT_3h
AT1G19350	Encodes brassinosteroid (BR) signalling protein that accumulates in the nucleus as dephosphorylated form in response to BRs. Is phosphorylated by the BIN2 GSK3 kinase. It synergistically interacts with BIM1 to bind to E box sequences (CANNTG). The protein contains a nuclear localization signal (NLS), followed by a highly conserved amino-terminal domain (N) shared by all family members, a BIN2 pho…	BES1,BZR2	A5	AT1G19350_ID4	AT1G19350_ID2	gun1_3h	WT_3h
AT1G19350	Encodes brassinosteroid (BR) signalling protein that accumulates in the nucleus as dephosphorylated form in response to BRs. Is phosphorylated by the BIN2 GSK3 kinase. It synergistically interacts with BIM1 to bind to E box sequences (CANNTG). The protein contains a nuclear localization signal (NLS), followed by a highly conserved amino-terminal domain (N) shared by all family members, a BIN2 pho…	BES1,BZR2	IR	AT1G19350_ID4	AT1G19350_ID2	gun1_3h	WT_3h
AT1G19650	Sec14p-like phosphatidylinositol transfer family protein;(source:Araport11)	NA	A3	AT1G19650_P2	AT1G19650_JS7	gun1_3h	WT_3h
AT1G19650	Sec14p-like phosphatidylinositol transfer family protein;(source:Araport11)	NA	IR	AT1G19650_P2	AT1G19650_JS7	gun1_3h	WT_3h
AT1G19650	Sec14p-like phosphatidylinositol transfer family protein;(source:Araport11)	NA	IR	AT1G19650_P2	AT1G19650_P1	gun1_3h	WT_3h
AT1G19690	NAD(P)-binding Rossmann-fold superfamily protein;(source:Araport11)	NA	IR	AT1G19690_ID1	AT1G19690_c1	gun1_3h	WT_3h
AT1G19690	NAD(P)-binding Rossmann-fold superfamily protein;(source:Araport11)	NA	A3	AT1G19690_ID1	AT1G19690_ID15	gun1_3h	WT_3h
AT1G19690	NAD(P)-binding Rossmann-fold superfamily protein;(source:Araport11)	NA	IR	AT1G19690_ID1	AT1G19690_ID15	gun1_3h	WT_3h
AT1G19690	NAD(P)-binding Rossmann-fold superfamily protein;(source:Araport11)	NA	A3	AT1G19690_ID1	AT1G19690_ID5	gun1_3h	WT_3h
AT1G21630	TPLATE Adaptor complex subunit.	AtEH2	A3	AT1G21630_P1	AT1G21630_s1	gun1_3h	WT_3h
AT1G22300	Encodes a 14-3-3 protein. This protein is reported to interact with the BZR1 transcription factor involved in brassinosteroid signaling and may affect the nucleocytoplasmic shuttling of BZR1. Might act as a stabilization factor to mediate the oligomerization of REM on the plasma membrane.	14-3-3EPSILON,GF14_EPSILON,GRF10	IR	AT1G22300.3	AT1G22300_P1	gun1_3h	WT_3h
AT1G22450	subunit 6b of cytochrome c oxidase	ATCOX6B2,COX6B	IR	AT1G22450.1	AT1G22450_ID1	gun1_3h	WT_3h
AT1G22650	Plant neutral invertase family protein;(source:Araport11)	A/N-InvD	A3	AT1G22650_c1	AT1G22650_P1	gun1_3h	WT_3h
AT1G22960	Pentatricopeptide repeat (PPR) superfamily protein;(source:Araport11)	NA	A3	AT1G22960.1	AT1G22960_c1	gun1_3h	WT_3h
AT1G22960	Pentatricopeptide repeat (PPR) superfamily protein;(source:Araport11)	NA	IR	AT1G22960.1	AT1G22960_c1	gun1_3h	WT_3h
AT1G23280	MAK16 protein-like protein;(source:Araport11)	NA	A5	AT1G23280_P1	AT1G23280_JC9	gun1_3h	WT_3h
AT1G25098	Natural antisense transcript overlaps with AT1G25097;(source:Araport11)	NA	IR	AT1G25098_ID1	AT1G25098.2	gun1_3h	WT_3h
AT1G26460	Tetratricopeptide repeat (TPR)-like superfamily protein;(source:Araport11)	NA	A5	AT1G26460_c1	AT1G26460_P1	gun1_3h	WT_3h
AT1G27970	Encodes an ortholog of yeast NTF2, a nuclear envelop transport protein that functions as the nuclear import receptor for RanGDP, an essential player in nucleocytoplasmic transport. The mRNA is cell-to-cell mobile.	NTF2B	IR	AT1G27970_P1	AT1G27970.2	gun1_3h	WT_3h
AT1G28580	GDSL-motif esterase/acyltransferase/lipase. Enzyme group with broad substrate specificity that may catalyze acyltransfer or hydrolase reactions with lipid and non-lipid substrates.	NA	IR	AT1G28580_P1	AT1G28580_P2	gun1_3h	WT_3h
AT1G30040	Encodes a gibberellin 2-oxidase that acts on C-19 gibberellins. AtGA2OX2 expression is responsive to cytokinin and KNOX activities.	ATGA2OX2,GA2OX2,GA2OX2	IR	AT1G30040_P2	AT1G30040_P1	gun1_3h	WT_3h
AT1G30330	Encodes a member of the auxin response factor family. Mediates auxin response via expression of auxin regulated genes. Acts redundantly with ARF8 to control stamen elongation and flower maturation. Expression of ARF6 is controlled by miR167.	ARF6	IR	AT1G30330_P3	AT1G30330.2	gun1_3h	WT_3h
AT1G30520	Encodes a chloroplast O-succinylbenzoyl-CoA ligase. Involved in phylloquinone biosynthesis. Knock mutant is seedling lethal.	AAE14	A3	AT1G30520_s1	AT1G30520_c1	gun1_3h	WT_3h
AT1G30520	Encodes a chloroplast O-succinylbenzoyl-CoA ligase. Involved in phylloquinone biosynthesis. Knock mutant is seedling lethal.	AAE14	A5	AT1G30520_P1	AT1G30520_c1	gun1_3h	WT_3h
AT1G30520	Encodes a chloroplast O-succinylbenzoyl-CoA ligase. Involved in phylloquinone biosynthesis. Knock mutant is seedling lethal.	AAE14	A5	AT1G30520_s1	AT1G30520_c1	gun1_3h	WT_3h
AT1G30520	Encodes a chloroplast O-succinylbenzoyl-CoA ligase. Involved in phylloquinone biosynthesis. Knock mutant is seedling lethal.	AAE14	IR	AT1G30520_s1	AT1G30520_c1	gun1_3h	WT_3h
AT1G30520	Encodes a chloroplast O-succinylbenzoyl-CoA ligase. Involved in phylloquinone biosynthesis. Knock mutant is seedling lethal.	AAE14	IR	AT1G30520_s1	AT1G30520_s2	gun1_3h	WT_3h
AT1G31440	SH3 domain-containing protein;(source:Araport11)	SH3P1	A3	AT1G31440_P1	AT1G31440_c1	gun1_3h	WT_3h
AT1G31440	SH3 domain-containing protein;(source:Araport11)	SH3P1	A5	AT1G31440_P1	AT1G31440_c1	gun1_3h	WT_3h
AT1G32230	Encodes a protein belonging to the (ADP-ribosyl)transferase domain-containing subfamily of WWE protein-protein interaction domain protein family. Superoxide radicals are necessary and sufficient to propagate cell death or lesion formation in rcd1 mutants. Without stress treatment, RCD1 is localized in the nucleus. Under high salt or oxidative stress, RCD1 is found not only in the nucleus but also…	ATP8,AtRCD1,CEO,CEO1,RCD1,RIMB1	IR	AT1G32230_P2	AT1G32230.3	gun1_3h	WT_3h
AT1G32230	Encodes a protein belonging to the (ADP-ribosyl)transferase domain-containing subfamily of WWE protein-protein interaction domain protein family. Superoxide radicals are necessary and sufficient to propagate cell death or lesion formation in rcd1 mutants. Without stress treatment, RCD1 is localized in the nucleus. Under high salt or oxidative stress, RCD1 is found not only in the nucleus but also…	ATP8,AtRCD1,CEO,CEO1,RCD1,RIMB1	A3	AT1G32230_P2	AT1G32230_s1	gun1_3h	WT_3h
AT1G32230	Encodes a protein belonging to the (ADP-ribosyl)transferase domain-containing subfamily of WWE protein-protein interaction domain protein family. Superoxide radicals are necessary and sufficient to propagate cell death or lesion formation in rcd1 mutants. Without stress treatment, RCD1 is localized in the nucleus. Under high salt or oxidative stress, RCD1 is found not only in the nucleus but also…	ATP8,AtRCD1,CEO,CEO1,RCD1,RIMB1	A5	AT1G32230_P2	AT1G32230_s1	gun1_3h	WT_3h
AT1G32400	TOM2A encodes a 280 amino acid putative four-pass transmembrane protein with a C-terminal farnesylation signal, essential for efficient multiplication of tobacco mosaic viruses.	TOM2A	A3	AT1G32400_P1	AT1G32400_ID4	gun1_3h	WT_3h
AT1G33790	jacalin lectin family protein;(source:Araport11)	NA	MES	AT1G33790_P2	AT1G33790_P3	gun1_3h	WT_3h
AT1G34320	Ikzf5 (DUF668);(source:Araport11)	PSI1	A3	AT1G34320_P1	AT1G34320_JS1	gun1_3h	WT_3h
AT1G35515	high response to osmotic stress 10;(source:Araport11)	MYB8	IR	AT1G35515_ID3	AT1G35515_ID2	gun1_3h	WT_3h
AT1G35780	N-lysine methyltransferase;(source:Araport11)	NA	IR	AT1G35780_P2	AT1G35780_P1	gun1_3h	WT_3h
AT1G37130	Identified as a mutant resistant to chlorate. Encodes nitrate reductase structural gene. Involved in nitrate assimilation. Has nitrate reductase activity. Up-regulated by the fungus P. indica. Binds transcription factor At2g35940. The mRNA is cell-to-cell mobile.	ATNR2,B29,CHL3,NIA2,NIA2-1,NR,NR2	IR	AT1G37130_P1	AT1G37130_c3	gun1_3h	WT_3h
AT1G43170	Encodes a cytoplasmic ribosomal protein. The mRNA is cell-to-cell mobile.	ARP1,emb2207,RP1,RPL3A	A3	AT1G43170_P1	AT1G43170.4	gun1_3h	WT_3h
AT1G43170	Encodes a cytoplasmic ribosomal protein. The mRNA is cell-to-cell mobile.	ARP1,emb2207,RP1,RPL3A	MES	AT1G43170_P1	AT1G43170.4	gun1_3h	WT_3h
AT1G43670	Encodes a fructose-1,6-bisphosphatase. This enzyme, in addition to catalyzing the formation of fructose-6-phosphate for sucrose biosynthesis, appears to play a role in fructose-mediated signaling that is independent of its enzymatic activity. atcfbp-1/fins1 mutants have reduced photosynthetic rates, elevated levels of starch and reduced levels of sucrose during the day. Although the protein is ex…	AtcFBP,cyfbp,FBP,FINS1	A3	AT1G43670_P1	AT1G43670_ID19	gun1_3h	WT_3h
AT1G43670	Encodes a fructose-1,6-bisphosphatase. This enzyme, in addition to catalyzing the formation of fructose-6-phosphate for sucrose biosynthesis, appears to play a role in fructose-mediated signaling that is independent of its enzymatic activity. atcfbp-1/fins1 mutants have reduced photosynthetic rates, elevated levels of starch and reduced levels of sucrose during the day. Although the protein is ex…	AtcFBP,cyfbp,FBP,FINS1	A5	AT1G43670_P1	AT1G43670_ID19	gun1_3h	WT_3h
AT1G43670	Encodes a fructose-1,6-bisphosphatase. This enzyme, in addition to catalyzing the formation of fructose-6-phosphate for sucrose biosynthesis, appears to play a role in fructose-mediated signaling that is independent of its enzymatic activity. atcfbp-1/fins1 mutants have reduced photosynthetic rates, elevated levels of starch and reduced levels of sucrose during the day. Although the protein is ex…	AtcFBP,cyfbp,FBP,FINS1	MES	AT1G43670_P1	AT1G43670_ID19	gun1_3h	WT_3h
AT1G46768	encodes a member of the DREB subfamily A-5 of ERF/AP2 transcription factor family (RAP2.1). The protein contains one AP2 domain. There are 16 members in this subfamily including RAP2.9 and RAP2.10.	RAP2.1	IR	AT1G46768_P1	AT1G46768_P2	gun1_3h	WT_3h
AT1G47128	Cysteine proteinase precursor-like protein/ dehydration stress-responsive gene (RD21). Has been shown to have peptide ligase activity and protease activity in vitro. RD21 is involved in immunity to the necrotrophic fungal pathogen Botrytis cinerea.Activity detected in root, leaf, flower and cell culture.	RD21,RD21A	A3	AT1G47128_P1	AT1G47128_ID8	gun1_3h	WT_3h
AT1G47128	Cysteine proteinase precursor-like protein/ dehydration stress-responsive gene (RD21). Has been shown to have peptide ligase activity and protease activity in vitro. RD21 is involved in immunity to the necrotrophic fungal pathogen Botrytis cinerea.Activity detected in root, leaf, flower and cell culture.	RD21,RD21A	A5	AT1G47128_P1	AT1G47128_ID8	gun1_3h	WT_3h
AT1G47128	Cysteine proteinase precursor-like protein/ dehydration stress-responsive gene (RD21). Has been shown to have peptide ligase activity and protease activity in vitro. RD21 is involved in immunity to the necrotrophic fungal pathogen Botrytis cinerea.Activity detected in root, leaf, flower and cell culture.	RD21,RD21A	IR	AT1G47128_P1	AT1G47128_ID8	gun1_3h	WT_3h
AT1G47128	Cysteine proteinase precursor-like protein/ dehydration stress-responsive gene (RD21). Has been shown to have peptide ligase activity and protease activity in vitro. RD21 is involved in immunity to the necrotrophic fungal pathogen Botrytis cinerea.Activity detected in root, leaf, flower and cell culture.	RD21,RD21A	MES	AT1G47128_P1	AT1G47128_ID8	gun1_3h	WT_3h
AT1G49350	PsiMP Glycosylase (PUMY) that hydrolyzes PsiMP to uracil and ribose-5-phosphate. Acts together with PUMY in the peroxisome to prevent toxic pseudouridine monophosphate accumulation. Acts together with the a pseudouridine kinase PUKI in the peroxisome to prevent toxic pseudouridine monophosphate accumulation.	NA	A5	AT1G49350_ID4	AT1G49350_ID8	gun1_3h	WT_3h
AT1G49350	PsiMP Glycosylase (PUMY) that hydrolyzes PsiMP to uracil and ribose-5-phosphate. Acts together with PUMY in the peroxisome to prevent toxic pseudouridine monophosphate accumulation. Acts together with the a pseudouridine kinase PUKI in the peroxisome to prevent toxic pseudouridine monophosphate accumulation.	NA	IR	AT1G49350_ID4	AT1G49350_ID8	gun1_3h	WT_3h
AT1G50460	Involved in glucose-ethylene crosstalk.	ATHKL1,HKL1	IR	AT1G50460_s4	AT1G50460_P2	gun1_3h	WT_3h
AT1G50460	Involved in glucose-ethylene crosstalk.	ATHKL1,HKL1	A5	AT1G50460_s4	AT1G50460_s1	gun1_3h	WT_3h
AT1G50510	5'-pseudouridine monophosphate Glycosylase (PUMY) that hydrolyzes 5'-pseudouridine monophosphate to uracil and ribose-5-phosphate. Acts together with the a pseudouridine kinase PUKI in the peroxisome to prevent toxic pseudouridine monophosphate accumulation.	NA	A3	AT1G50510_P1	AT1G50510_ID3	gun1_3h	WT_3h
AT1G50510	5'-pseudouridine monophosphate Glycosylase (PUMY) that hydrolyzes 5'-pseudouridine monophosphate to uracil and ribose-5-phosphate. Acts together with the a pseudouridine kinase PUKI in the peroxisome to prevent toxic pseudouridine monophosphate accumulation.	NA	A3	AT1G50510_ID4	AT1G50510_ID3	gun1_3h	WT_3h
AT1G50510	5'-pseudouridine monophosphate Glycosylase (PUMY) that hydrolyzes 5'-pseudouridine monophosphate to uracil and ribose-5-phosphate. Acts together with the a pseudouridine kinase PUKI in the peroxisome to prevent toxic pseudouridine monophosphate accumulation.	NA	A5	AT1G50510_ID4	AT1G50510_ID3	gun1_3h	WT_3h
AT1G50510	5'-pseudouridine monophosphate Glycosylase (PUMY) that hydrolyzes 5'-pseudouridine monophosphate to uracil and ribose-5-phosphate. Acts together with the a pseudouridine kinase PUKI in the peroxisome to prevent toxic pseudouridine monophosphate accumulation.	NA	A5	AT1G50510_P1	AT1G50510_ID3	gun1_3h	WT_3h
AT1G50510	5'-pseudouridine monophosphate Glycosylase (PUMY) that hydrolyzes 5'-pseudouridine monophosphate to uracil and ribose-5-phosphate. Acts together with the a pseudouridine kinase PUKI in the peroxisome to prevent toxic pseudouridine monophosphate accumulation.	NA	IR	AT1G50510_ID4	AT1G50510_ID3	gun1_3h	WT_3h
AT1G50510	5'-pseudouridine monophosphate Glycosylase (PUMY) that hydrolyzes 5'-pseudouridine monophosphate to uracil and ribose-5-phosphate. Acts together with the a pseudouridine kinase PUKI in the peroxisome to prevent toxic pseudouridine monophosphate accumulation.	NA	MES	AT1G50510_P1	AT1G50510_ID3	gun1_3h	WT_3h
AT1G50510	5'-pseudouridine monophosphate Glycosylase (PUMY) that hydrolyzes 5'-pseudouridine monophosphate to uracil and ribose-5-phosphate. Acts together with the a pseudouridine kinase PUKI in the peroxisome to prevent toxic pseudouridine monophosphate accumulation.	NA	MES	AT1G50510_ID4	AT1G50510_ID3	gun1_3h	WT_3h
AT1G50700	Member of Calcium Dependent Protein Kinase. Mediates Strigolactone-Induced Stomatal Closure	CPK33	IR	AT1G50700_ID4	AT1G50700_P1	gun1_3h	WT_3h
AT1G51270	vesicle-associated protein 1-4;(source:Araport11)	NA	A3	AT1G51270_s2	AT1G51270_ID41	gun1_3h	WT_3h
AT1G51270	vesicle-associated protein 1-4;(source:Araport11)	NA	IR	AT1G51270_c2	AT1G51270_ID41	gun1_3h	WT_3h
AT1G51270	vesicle-associated protein 1-4;(source:Araport11)	NA	IR	AT1G51270_s2	AT1G51270_ID41	gun1_3h	WT_3h
AT1G51270	vesicle-associated protein 1-4;(source:Araport11)	NA	IR	AT1G51270_P3	AT1G51270_ID41	gun1_3h	WT_3h
AT1G51745	Tudor/PWWP/MBT superfamily protein;(source:Araport11)	PWWP2,SL1	IR	AT1G51745_P1	AT1G51745.1	gun1_3h	WT_3h
AT1G51830	Leucine-rich repeat protein kinase family protein;(source:Araport11)	SIF1	A3	AT1G51830_P2	AT1G51830_c1	gun1_3h	WT_3h
AT1G52150	Member of the class III HD-ZIP protein family. Contains homeodomain and leucine zipper domain. Critical for vascular development and negatively regulates vascular cell differentiation.	ATHB-15,ATHB15,CNA,ICU4	IR	AT1G52150_P1	AT1G52150_P3	gun1_3h	WT_3h
AT1G52310	protein kinase family protein / C-type lectin domain-containing protein;(source:Araport11)	NA	IR	AT1G52310_ID10	AT1G52310.1	gun1_3h	WT_3h
AT1G52330	Late embryogenesis abundant (LEA) hydroxyproline-rich glycoprotein family;(source:Araport11)	NA	ATSS	AT1G52330_P2	AT1G52330_P1	gun1_3h	WT_3h
AT1G52330	Late embryogenesis abundant (LEA) hydroxyproline-rich glycoprotein family;(source:Araport11)	NA	IR	AT1G52330_P2	AT1G52330_P1	gun1_3h	WT_3h
AT1G53110	proton pump-interactor;(source:Araport11)	NA	IR	AT1G53110_P1	AT1G53110_ID3	gun1_3h	WT_3h
AT1G53850	Encodes alpha5 subunit of 20s proteosome involved in protein degradation and RNA degradation.	ATPAE1,PAE1	IR	AT1G53850_P2	AT1G53850_P1	gun1_3h	WT_3h
AT1G54380	Encodes GEMIN2, a spliceosomal small nuclear ribonucleoprotein assembly factor conserved from yeast to humans. GEMIN2 is a key component of a posttranscriptional regulatory mechanism that ensures the appropriate acclimation of plants to daily and seasonal changes in temperature conditions. It controls the alternative splicing of several circadian clock genes and attenuates the effects of temperat…	GEMIN2	A3	AT1G54380_P1	AT1G54380_c3	gun1_3h	WT_3h
AT1G54440	Rrp6-like protein, controls RNA-directed DNA methylation by helping with the retention of noncoding RNAs in normal cells.	AAtrimmer1,AtRRP6L1,RRP6L1	A3	AT1G54440_ID4	AT1G54440_JS4	gun1_3h	WT_3h
AT1G54440	Rrp6-like protein, controls RNA-directed DNA methylation by helping with the retention of noncoding RNAs in normal cells.	AAtrimmer1,AtRRP6L1,RRP6L1	IR	AT1G54440_JS3	AT1G54440_JS4	gun1_3h	WT_3h
AT1G54440	Rrp6-like protein, controls RNA-directed DNA methylation by helping with the retention of noncoding RNAs in normal cells.	AAtrimmer1,AtRRP6L1,RRP6L1	IR	AT1G54440_ID4	AT1G54440_JS4	gun1_3h	WT_3h
AT1G55280	Lipase/lipooxygenase, PLAT/LH2 family protein;(source:Araport11)	NA	IR	AT1G55280_ID2	AT1G55280_P2	gun1_3h	WT_3h
AT1G55280	Lipase/lipooxygenase, PLAT/LH2 family protein;(source:Araport11)	NA	IR	AT1G55280_ID2	AT1G55280_s1	gun1_3h	WT_3h
AT1G55535	transmembrane protein;(source:Araport11)	NA	IR	AT1G55535_P3	AT1G55535_P1	gun1_3h	WT_3h
AT1G55810	One of the homologous genes predicted to encode proteins with UPRT domains (Uracil phosphoribosyltransferase). Five of these genes (At5g40870, At3g27190, At1g55810, At4g26510 and At3g27440) show a high level of identity, and are annotated as also containing a N-terminal uracil kinase (UK) domain. These genes are referred to as UKL1 (UK-like 1), UKL2, UKL3, UKL4 and UKL5, respectively.	UKL3	IR	AT1G55810_P5	AT1G55810_ID13	gun1_3h	WT_3h
AT1G55810	One of the homologous genes predicted to encode proteins with UPRT domains (Uracil phosphoribosyltransferase). Five of these genes (At5g40870, At3g27190, At1g55810, At4g26510 and At3g27440) show a high level of identity, and are annotated as also containing a N-terminal uracil kinase (UK) domain. These genes are referred to as UKL1 (UK-like 1), UKL2, UKL3, UKL4 and UKL5, respectively.	UKL3	IR	AT1G55810_P5	AT1G55810_P3	gun1_3h	WT_3h
AT1G56520	Disease resistance protein (TIR-NBS-LRR class) family;(source:Araport11)	NA	A5	AT1G56520_P1	AT1G56520_s1	gun1_3h	WT_3h
AT1G56520	Disease resistance protein (TIR-NBS-LRR class) family;(source:Araport11)	NA	IR	AT1G56520_P1	AT1G56520_s1	gun1_3h	WT_3h
AT1G58030	Encodes a member of the cationic amino acid transporter (CAT) subfamily of amino acid polyamine choline transporters. Localized to the tonoplast.	AtCAT2,CAT2	A3	AT1G58030_P1	AT1G58030_c1	gun1_3h	WT_3h
AT1G59218	Similar to disease resistance proteins.	NA	A3	AT1G59218_P1	AT1G59218_s2	gun1_3h	WT_3h
AT1G59218	Similar to disease resistance proteins.	NA	IR	AT1G59218_P1	AT1G59218_s2	gun1_3h	WT_3h
AT1G60490	Encodes a phosphatidylinositol 3-kinase that is expressed in most plant tissues. Defects in VPS34 affect a number of cellular processes. Loss of function mutations are not transmitted through the male gametophyte due to defects in microgametogenesis therefore it is difficult to assess the effects of loss of VPS34 function in the whole plant. Involved in salt-stress responses.	ATVPS34,PI3K,VPS34	IR	AT1G60490_P1	AT1G60490_ID2	gun1_3h	WT_3h
AT1G60505	Natural antisense transcript overlaps with AT1G60510;(source:Araport11)	NA	A3	AT1G60505_c1	AT1G60505_ID4	gun1_3h	WT_3h
AT1G60610	SBP (S-ribonuclease binding protein) family protein;(source:Araport11)	NA	A3	AT1G60610_P1	AT1G60610_P3	gun1_3h	WT_3h
AT1G60610	SBP (S-ribonuclease binding protein) family protein;(source:Araport11)	NA	IR	AT1G60610_P1	AT1G60610_P3	gun1_3h	WT_3h
AT1G61250	Encodes a putative secretory carrier membrane protein (SC3). The mRNA is cell-to-cell mobile.	AtSCAMP1,SC3,SCAMP1	A3	AT1G61250_P1	AT1G61250.2	gun1_3h	WT_3h
AT1G61250	Encodes a putative secretory carrier membrane protein (SC3). The mRNA is cell-to-cell mobile.	AtSCAMP1,SC3,SCAMP1	A5	AT1G61250_P1	AT1G61250.2	gun1_3h	WT_3h
AT1G62300	Encodes a transcription factor WRKY6. Regulates Phosphate1 (Pho1) expression in response to low phosphate (Pi) stress.	ATWRKY6,WRKY6	IR	AT1G62300_P1	AT1G62300_ID2	gun1_3h	WT_3h
AT1G63660	GMP synthase (glutamine-hydrolyzing), putative / glutamine amidotransferase;(source:Araport11)	NA	A3	AT1G63660_P1	AT1G63660_ID1	gun1_3h	WT_3h
AT1G63660	GMP synthase (glutamine-hydrolyzing), putative / glutamine amidotransferase;(source:Araport11)	NA	A5	AT1G63660_P1	AT1G63660_ID1	gun1_3h	WT_3h
AT1G63660	GMP synthase (glutamine-hydrolyzing), putative / glutamine amidotransferase;(source:Araport11)	NA	MES	AT1G63660_P1	AT1G63660_ID1	gun1_3h	WT_3h
AT1G64090	Reticulan like protein B3;(source:Araport11)	RTN3,RTNLB3	IR	AT1G64090_P1	AT1G64090_c1	gun1_3h	WT_3h
AT1G65720	transmembrane protein;(source:Araport11)	NA	IR	AT1G65720_P1	AT1G65720_JC1	gun1_3h	WT_3h
AT1G66240	homolog of anti-oxidant 1;(source:Araport11)	ATATX1,ATX1	ES	AT1G66240_P1	AT1G66240.3	gun1_3h	WT_3h
AT1G66810	Encodes a tandem CCCH zinc finger (TZF) protein that can bind DNA and RNA, function as a transcriptional activator, and is involved in secondary wall biosynthesis.	AtC3H14	A3	AT1G66810_P3	AT1G66810_P1	gun1_3h	WT_3h
AT1G66810	Encodes a tandem CCCH zinc finger (TZF) protein that can bind DNA and RNA, function as a transcriptional activator, and is involved in secondary wall biosynthesis.	AtC3H14	IR	AT1G66810_P3	AT1G66810_P2	gun1_3h	WT_3h
AT1G68690	Encodes a member of the proline-rich extensin-like receptor kinase (PERK) family. This family consists of 15 predicted receptor kinases (PMID: 15653807).	AtPERK9,PERK9	IR	AT1G68690_P1	AT1G68690_P4	gun1_3h	WT_3h
AT1G69080	Adenine nucleotide alpha hydrolases-like superfamily protein;(source:Araport11)	NA	A3	AT1G69080_c1	AT1G69080_P1	gun1_3h	WT_3h
AT1G69750	cytochrome c oxidase 19-2;(source:Araport11)	ATCOX19-2,COX19-2	IR	AT1G69750_P1	AT1G69750_P3	gun1_3h	WT_3h
AT1G70505	transmembrane protein;(source:Araport11)	NA	A5	AT1G70505_P4	AT1G70505_JS3	gun1_3h	WT_3h
AT1G70505	transmembrane protein;(source:Araport11)	NA	IR	AT1G70505_P4	AT1G70505_JS3	gun1_3h	WT_3h
AT1G70505	transmembrane protein;(source:Araport11)	NA	IR	AT1G70505_s3	AT1G70505_JS3	gun1_3h	WT_3h
AT1G70620	cyclin-like protein;(source:Araport11)	NA	IR	AT1G70620_P4	AT1G70620_P8	gun1_3h	WT_3h
AT1G70620	cyclin-like protein;(source:Araport11)	NA	IR	AT1G70620_P6	AT1G70620_P8	gun1_3h	WT_3h
AT1G71696	Encodes a Putative Zn2+ carboxypeptidase, 4 splice variants have been identified but not characterized for different functions and/or expression patterns.SOL1 isolated as a suppressor of root- specific overexpression of CLE19, a clavata3 like gene. sol1 partially suppresses the short root phenotype caused by CLE19 overexpression.	SOL1	A3	AT1G71696_JS4	AT1G71696_P2	gun1_3h	WT_3h
AT1G72150	novel cell-plate-associated protein that is related in sequence to proteins involved in membrane trafficking in other eukaryotes The mRNA is cell-to-cell mobile.	PATL1	A3	AT1G72150_P1	AT1G72150_ID5	gun1_3h	WT_3h
AT1G72150	novel cell-plate-associated protein that is related in sequence to proteins involved in membrane trafficking in other eukaryotes The mRNA is cell-to-cell mobile.	PATL1	IR	AT1G72150_P1	AT1G72150_ID5	gun1_3h	WT_3h
AT1G72320	Encodes a member of the Arabidopsis Pumilio (APUM) proteins containing PUF domain (eight repeats of approximately 36 amino acids each). PUF proteins regulate both mRNA stability and translation through sequence-specific binding to the 3' UTR of target mRNA transcripts.	APUM23,PUM23	A3	AT1G72320_s1	AT1G72320_ID7	gun1_3h	WT_3h
AT1G72320	Encodes a member of the Arabidopsis Pumilio (APUM) proteins containing PUF domain (eight repeats of approximately 36 amino acids each). PUF proteins regulate both mRNA stability and translation through sequence-specific binding to the 3' UTR of target mRNA transcripts.	APUM23,PUM23	A5	AT1G72320_s1	AT1G72320_ID7	gun1_3h	WT_3h
AT1G72370	acidic protein associated to 40S ribosomal subunit of ribosomes. Involved in polysome formation during active protein synthesis. Expressed in actively growing tissue.	AP40,P40,RP40,RPSAA	A3	AT1G72370_P1	AT1G72370_ID6	gun1_3h	WT_3h
AT1G72370	acidic protein associated to 40S ribosomal subunit of ribosomes. Involved in polysome formation during active protein synthesis. Expressed in actively growing tissue.	AP40,P40,RP40,RPSAA	MES	AT1G72370_P1	AT1G72370_ID6	gun1_3h	WT_3h
AT1G72660	P-loop containing nucleoside triphosphate hydrolases superfamily protein;(source:Araport11)	Drg1-3	A3	AT1G72660.3	AT1G72660.2	gun1_3h	WT_3h
AT1G72660	P-loop containing nucleoside triphosphate hydrolases superfamily protein;(source:Araport11)	Drg1-3	IR	AT1G72660.3	AT1G72660.2	gun1_3h	WT_3h
AT1G72660	P-loop containing nucleoside triphosphate hydrolases superfamily protein;(source:Araport11)	Drg1-3	A3	AT1G72660.3	AT1G72660_P4	gun1_3h	WT_3h
AT1G72660	P-loop containing nucleoside triphosphate hydrolases superfamily protein;(source:Araport11)	Drg1-3	IR	AT1G72660.3	AT1G72660_P4	gun1_3h	WT_3h
AT1G72770	mutant has ABA hypersensitive inhibition of seed germination; Protein Phosphatase 2C; regulates the activation of the Snf1-related kinase OST1 by abscisic acid. The mRNA is cell-to-cell mobile.	AtHAB1,HAB1	IR	AT1G72770_ID1	AT1G72770_P2	gun1_3h	WT_3h
AT1G73177	The BONSAI gene encodes a protein with similarity to the APC13 component of the Anaphase Promoting Complex. Plants with lowered level of BONSAI expression, resulting from hypomethylation, RNAi knock-down, or a T-DNA insertion show some abnormalities in shoot and inflorescence development.	APC13,BNS	A5	AT1G73177_P1	AT1G73177_ID1	gun1_3h	WT_3h
AT1G73177	The BONSAI gene encodes a protein with similarity to the APC13 component of the Anaphase Promoting Complex. Plants with lowered level of BONSAI expression, resulting from hypomethylation, RNAi knock-down, or a T-DNA insertion show some abnormalities in shoot and inflorescence development.	APC13,BNS	IR	AT1G73177_P1	AT1G73177_ID1	gun1_3h	WT_3h
AT1G73177	The BONSAI gene encodes a protein with similarity to the APC13 component of the Anaphase Promoting Complex. Plants with lowered level of BONSAI expression, resulting from hypomethylation, RNAi knock-down, or a T-DNA insertion show some abnormalities in shoot and inflorescence development.	APC13,BNS	A5	AT1G73177_P1	AT1G73177_ID3	gun1_3h	WT_3h
AT1G73177	The BONSAI gene encodes a protein with similarity to the APC13 component of the Anaphase Promoting Complex. Plants with lowered level of BONSAI expression, resulting from hypomethylation, RNAi knock-down, or a T-DNA insertion show some abnormalities in shoot and inflorescence development.	APC13,BNS	IR	AT1G73177_P1	AT1G73177_ID3	gun1_3h	WT_3h
AT1G73640	RAB GTPase homolog A6A;(source:Araport11)	AtRABA6a,RABA6a	IR	AT1G73640_ID2	AT1G73640_P1	gun1_3h	WT_3h
AT1G74440	Similar to MPH1, can complement mph1-1 salt sensitivity phenotype.	NA	A3	AT1G74440_ID2	AT1G74440_s1	gun1_3h	WT_3h
AT1G74440	Similar to MPH1, can complement mph1-1 salt sensitivity phenotype.	NA	A3	AT1G74440.1	AT1G74440_s1	gun1_3h	WT_3h
AT1G74440	Similar to MPH1, can complement mph1-1 salt sensitivity phenotype.	NA	IR	AT1G74440_ID2	AT1G74440_s1	gun1_3h	WT_3h
AT1G74510	Galactose oxidase/kelch repeat superfamily protein;(source:Araport11)	NA	IR	AT1G74510_P1	AT1G74510.2	gun1_3h	WT_3h
AT1G74510	Galactose oxidase/kelch repeat superfamily protein;(source:Araport11)	NA	IR	AT1G74510_P1	AT1G74510_s1	gun1_3h	WT_3h
AT1G77090	thylakoid lumenal protein (Mog1/PsbP/DUF1795-like photosystem II reaction center PsbP family protein);(source:Araport11)	NA	A3	AT1G77090_P1	AT1G77090_ID2	gun1_3h	WT_3h
AT1G77090	thylakoid lumenal protein (Mog1/PsbP/DUF1795-like photosystem II reaction center PsbP family protein);(source:Araport11)	NA	A5	AT1G77090_P1	AT1G77090_ID2	gun1_3h	WT_3h
AT1G77090	thylakoid lumenal protein (Mog1/PsbP/DUF1795-like photosystem II reaction center PsbP family protein);(source:Araport11)	NA	IR	AT1G77090_P1	AT1G77090_ID2	gun1_3h	WT_3h
AT1G77320	Mutant is defective in meiosis and produces abnormal microspores. Encodes a BRCT-domain-containing protein that could be specific to the meiotic cell cycle and that plays a crucial role in some DNA repair events independent of SPO11 DSB recombination repair.	MEI1	IR	AT1G77320_P1	AT1G77320_P3	gun1_3h	WT_3h
AT1G78040	Pollen Ole e 1 allergen and extensin family protein;(source:Araport11)	NA	A3	AT1G78040_JS1	AT1G78040_JS2	gun1_3h	WT_3h
AT1G78040	Pollen Ole e 1 allergen and extensin family protein;(source:Araport11)	NA	A5	AT1G78040_JS1	AT1G78040_JS2	gun1_3h	WT_3h
AT1G79380	Encodes a ubiquitin ligase that is an essential upstream modulator of JA signaling in response to various stimuli.	RGLG4	IR	AT1G79380.1	AT1G79380_ID11	gun1_3h	WT_3h
AT1G79700	WRI4 encodes an AP2/ERF-type transcriptional activator that specifically controls cuticular wax biosynthesis in Arabidopsis stems. It also functions to activate transcription of genes involved fatty acid biosynthesis during seed and flower development as well as stem wax biosynthesis. Targets identified by ChIP-seq include: LACS1, KCR1, PAS2, ECR, and WSD1.	WRI4	IR	AT1G79700_ID6	AT1G79700_ID3	gun1_3h	WT_3h
AT1G79740	hAT transposon superfamily;(source:Araport11)	NA	IR	AT1G79740_P4	AT1G79740_P1	gun1_3h	WT_3h
AT1G79830	This gene is predicted to encode a protein that functions as a Golgi apparatus structural component known as a golgin in mammals and yeast. A fluorescently-tagged version of GC5 co-localizes with Golgi markers, and this localization appears to be replicated using the C-terminal (139 aa) portion of the protein. The C-terminal portion of the protein can also specifically interact with two members o…	GC5	IR	AT1G79830_P1	AT1G79830_ID28	gun1_3h	WT_3h
AT1G80780	Deadenylase.	NA	IR	AT1G80780_P2	AT1G80780_P1	gun1_3h	WT_3h
AT2G02080	C2H2 BIRD transcription factor family.	AtIDD4,IDD4,IME	A5	AT2G02080_P4	AT2G02080_P1	gun1_3h	WT_3h
AT2G03240	EXS (ERD1/XPR1/SYG1) family protein;(source:Araport11)	NA	IR	AT2G03240_JS2	AT2G03240.1	gun1_3h	WT_3h
AT2G03710	This gene belongs to the family of SEP genes. It is involved in the development of sepals, petals, stamens and carpels. Additionally, it plays a central role in the determination of flower meristem and organ identity.	AGL3,SEP4	A3	AT2G03710.1	AT2G03710_P2	gun1_3h	WT_3h
AT2G03710	This gene belongs to the family of SEP genes. It is involved in the development of sepals, petals, stamens and carpels. Additionally, it plays a central role in the determination of flower meristem and organ identity.	AGL3,SEP4	IR	AT2G03710.1	AT2G03710_P3	gun1_3h	WT_3h
AT2G04842	Encodes a dual localized threonyl-tRNA synthetase found both in the mitochondrion and the chloroplast. Plants mutated in this gene terminate as embryos in the globular stage.	EMB2761	A3	AT2G04842.1	AT2G04842_c2	gun1_3h	WT_3h
AT2G04842	Encodes a dual localized threonyl-tRNA synthetase found both in the mitochondrion and the chloroplast. Plants mutated in this gene terminate as embryos in the globular stage.	EMB2761	A5	AT2G04842.1	AT2G04842_c2	gun1_3h	WT_3h
AT2G04842	Encodes a dual localized threonyl-tRNA synthetase found both in the mitochondrion and the chloroplast. Plants mutated in this gene terminate as embryos in the globular stage.	EMB2761	MES	AT2G04842.1	AT2G04842_c2	gun1_3h	WT_3h
AT2G04940	scramblase-like protein;(source:Araport11)	NA	IR	AT2G04940_JC2	AT2G04940_P1	gun1_3h	WT_3h
AT2G05380	glycine-rich protein 3 short isoform (GRP3S) mRNA, complete The mRNA is cell-to-cell mobile.	GRP3S	A3	AT2G05380_P3	AT2G05380_ID2	gun1_3h	WT_3h
AT2G05380	glycine-rich protein 3 short isoform (GRP3S) mRNA, complete The mRNA is cell-to-cell mobile.	GRP3S	A5	AT2G05380_P3	AT2G05380_ID2	gun1_3h	WT_3h
AT2G05380	glycine-rich protein 3 short isoform (GRP3S) mRNA, complete The mRNA is cell-to-cell mobile.	GRP3S	IR	AT2G05380_P3	AT2G05380_ID2	gun1_3h	WT_3h
AT2G05380	glycine-rich protein 3 short isoform (GRP3S) mRNA, complete The mRNA is cell-to-cell mobile.	GRP3S	A3	AT2G05380_P3	AT2G05380_s2	gun1_3h	WT_3h
AT2G05380	glycine-rich protein 3 short isoform (GRP3S) mRNA, complete The mRNA is cell-to-cell mobile.	GRP3S	A5	AT2G05380_P3	AT2G05380_s2	gun1_3h	WT_3h
AT2G05380	glycine-rich protein 3 short isoform (GRP3S) mRNA, complete The mRNA is cell-to-cell mobile.	GRP3S	IR	AT2G05380_P3	AT2G05380_s2	gun1_3h	WT_3h
AT2G05710	Encodes an aconitase that can catalyze the conversion of citrate to isocitrate through a cis-aconitate intermediate, indicating that it may participate in the TCA cycle and other primary metabolic pathways. The protein is believed to accumulate in the mitochondria and the cytosol. It affects CSD2 (At2g28190 - a superoxide dismutase) transcript levels and may play a role in the response to oxidati…	ACO3	A3	AT2G05710_P1	AT2G05710_ID13	gun1_3h	WT_3h
AT2G05710	Encodes an aconitase that can catalyze the conversion of citrate to isocitrate through a cis-aconitate intermediate, indicating that it may participate in the TCA cycle and other primary metabolic pathways. The protein is believed to accumulate in the mitochondria and the cytosol. It affects CSD2 (At2g28190 - a superoxide dismutase) transcript levels and may play a role in the response to oxidati…	ACO3	A5	AT2G05710_P1	AT2G05710_ID13	gun1_3h	WT_3h
AT2G05990	Encodes enoyl-ACP reductase a component of the fatty acid synthase complex. A reduced function mutation in this gene, mod1, was found in a screen for premature cell death mutants. Mutant plants have reduced lipid level and pleiotropic morphological defects, including chlorotic and abnormally shaped leaves. The mRNA is cell-to-cell mobile.	ENR1,MOD1	A3	AT2G05990_P1	AT2G05990.2	gun1_3h	WT_3h
AT2G15290	Encodes a protein located in the chloroplast inner envelope. The study of mutant defective in the gene product suggests that the protein is involved in the translocation of protein across the envelope membrane into the chloroplast stroma.	AtTic21,CIA5,PIC1,TIC21	A3	AT2G15290_P1	AT2G15290_ID1	gun1_3h	WT_3h
AT2G15290	Encodes a protein located in the chloroplast inner envelope. The study of mutant defective in the gene product suggests that the protein is involved in the translocation of protein across the envelope membrane into the chloroplast stroma.	AtTic21,CIA5,PIC1,TIC21	A5	AT2G15290_P1	AT2G15290_ID1	gun1_3h	WT_3h
AT2G16090	RING/U-box superfamily protein;(source:Araport11)	ARI2,ATARI2	A5	AT2G16090_P1	AT2G16090_P4	gun1_3h	WT_3h
AT2G16790	P-loop containing nucleoside triphosphate hydrolases superfamily protein;(source:Araport11)	NA	IR	AT2G16790_P1	AT2G16790_P3	gun1_3h	WT_3h
AT2G16990	Major facilitator superfamily protein;(source:Araport11)	NA	IR	AT2G16990_P1	AT2G16990_P2	gun1_3h	WT_3h
AT2G16990	Major facilitator superfamily protein;(source:Araport11)	NA	IR	AT2G16990_P1	AT2G16990_P3	gun1_3h	WT_3h
AT2G17360	Ribosomal protein S4 (RPS4A) family protein;(source:Araport11)	NA	IR	AT2G17360_P1	AT2G17360.2	gun1_3h	WT_3h
AT2G17730	Intrinsic thylakoid membrane protein that fixes RPOTmp on the stromal side of the thylakoid membrane.	NIP2	A3	AT2G17730_P1	AT2G17730_c1	gun1_3h	WT_3h
AT2G17730	Intrinsic thylakoid membrane protein that fixes RPOTmp on the stromal side of the thylakoid membrane.	NIP2	IR	AT2G17730_P1	AT2G17730_c1	gun1_3h	WT_3h
AT2G18700	Encodes an enzyme putatively involved in trehalose biosynthesis. The protein has a trehalose synthase (TPS)-like domain that may or may not be active as well as a trehalose phosphatase (TPP)-like domain.	ATTPS11,ATTPSB,TPS11,TPS11	IR	AT2G18700_P1	AT2G18700_ID2	gun1_3h	WT_3h
AT2G20080	hypothetical protein;(source:Araport11)	TIE2	IR	AT2G20080_s1	AT2G20080_P1	gun1_3h	WT_3h
AT2G20550	HSP40/DnaJ peptide-binding protein;(source:Araport11)	NA	IR	AT2G20550_ID4	AT2G20550.2	gun1_3h	WT_3h
AT2G21160	Translocon-associated protein (TRAP), alpha subunit;(source:Araport11)	NA	A3	AT2G21160_P1	AT2G21160.2	gun1_3h	WT_3h
AT2G21160	Translocon-associated protein (TRAP), alpha subunit;(source:Araport11)	NA	A5	AT2G21160_P1	AT2G21160.2	gun1_3h	WT_3h
AT2G21160	Translocon-associated protein (TRAP), alpha subunit;(source:Araport11)	NA	ES	AT2G21160_P1	AT2G21160.2	gun1_3h	WT_3h
AT2G21385	Encodes a chloroplast stroma localized protein that is found only in the green plant lineage. It is involved in assembly of the chloroplast ATP synthase complex.	AtCGLD11,BFA3,CGLD11	A3	AT2G21385.1	AT2G21385.4	gun1_3h	WT_3h
AT2G21385	Encodes a chloroplast stroma localized protein that is found only in the green plant lineage. It is involved in assembly of the chloroplast ATP synthase complex.	AtCGLD11,BFA3,CGLD11	A3	AT2G21385_ID94	AT2G21385.4	gun1_3h	WT_3h
AT2G21385	Encodes a chloroplast stroma localized protein that is found only in the green plant lineage. It is involved in assembly of the chloroplast ATP synthase complex.	AtCGLD11,BFA3,CGLD11	IR	AT2G21385_ID94	AT2G21385.4	gun1_3h	WT_3h
AT2G21385	Encodes a chloroplast stroma localized protein that is found only in the green plant lineage. It is involved in assembly of the chloroplast ATP synthase complex.	AtCGLD11,BFA3,CGLD11	IR	AT2G21385.1	AT2G21385.4	gun1_3h	WT_3h
AT2G22840	Growth regulating factor encoding transcription activator. One of the nine members of a GRF gene family, containing nuclear targeting domain. Mutants result in smaller leaves indicating the role of the gene in leaf development. Expressed in root, shoot and flower	AtGRF1,GRF1	A5	AT2G22840_s2	AT2G22840_JS1	gun1_3h	WT_3h
AT2G22840	Growth regulating factor encoding transcription activator. One of the nine members of a GRF gene family, containing nuclear targeting domain. Mutants result in smaller leaves indicating the role of the gene in leaf development. Expressed in root, shoot and flower	AtGRF1,GRF1	A5	AT2G22840_s1	AT2G22840_JS1	gun1_3h	WT_3h
AT2G22840	Growth regulating factor encoding transcription activator. One of the nine members of a GRF gene family, containing nuclear targeting domain. Mutants result in smaller leaves indicating the role of the gene in leaf development. Expressed in root, shoot and flower	AtGRF1,GRF1	IR	AT2G22840_s2	AT2G22840_JS1	gun1_3h	WT_3h
AT2G22840	Growth regulating factor encoding transcription activator. One of the nine members of a GRF gene family, containing nuclear targeting domain. Mutants result in smaller leaves indicating the role of the gene in leaf development. Expressed in root, shoot and flower	AtGRF1,GRF1	IR	AT2G22840_P1	AT2G22840_JS1	gun1_3h	WT_3h
AT2G22920	serine carboxypeptidase-like 12;(source:Araport11)	FPT1,SCPL12	A3	AT2G22920_s3	AT2G22920_c4	gun1_3h	WT_3h
AT2G22920	serine carboxypeptidase-like 12;(source:Araport11)	FPT1,SCPL12	A5	AT2G22920_s3	AT2G22920_c4	gun1_3h	WT_3h
AT2G22920	serine carboxypeptidase-like 12;(source:Araport11)	FPT1,SCPL12	ES	AT2G22920_s3	AT2G22920_c4	gun1_3h	WT_3h
AT2G22920	serine carboxypeptidase-like 12;(source:Araport11)	FPT1,SCPL12	ES	AT2G22920_P2	AT2G22920_c4	gun1_3h	WT_3h
AT2G22920	serine carboxypeptidase-like 12;(source:Araport11)	FPT1,SCPL12	IR	AT2G22920_s3	AT2G22920_c4	gun1_3h	WT_3h
AT2G23030	encodes a member of SNF1-related protein kinases (SnRK2)	SNRK2-9,SNRK2.9	IR	AT2G23030_P1	AT2G23030_ID1	gun1_3h	WT_3h
AT2G23030	encodes a member of SNF1-related protein kinases (SnRK2)	SNRK2-9,SNRK2.9	ES	AT2G23030_P1	AT2G23030_ID5	gun1_3h	WT_3h
AT2G23985	hypothetical protein;(source:Araport11)	NA	IR	AT2G23985_P10	AT2G23985_P22	gun1_3h	WT_3h
AT2G23985	hypothetical protein;(source:Araport11)	NA	A5	AT2G23985_P10	AT2G23985_P7	gun1_3h	WT_3h
AT2G23985	hypothetical protein;(source:Araport11)	NA	IR	AT2G23985_P10	AT2G23985_P7	gun1_3h	WT_3h
AT2G23985	hypothetical protein;(source:Araport11)	NA	A3	AT2G23985_P10	AT2G23985_s9	gun1_3h	WT_3h
AT2G23985	hypothetical protein;(source:Araport11)	NA	IR	AT2G23985_P10	AT2G23985_s9	gun1_3h	WT_3h
AT2G24200	Cytosol aminopeptidase family protein;(source:Araport11)	atLAP1,LAP1	IR	AT2G24200_P1	AT2G24200.2	gun1_3h	WT_3h
AT2G24690	Transcriptional factor B3 family protein;(source:Araport11)	NA	A5	AT2G24690_s4	AT2G24690_ID17	gun1_3h	WT_3h
AT2G24690	Transcriptional factor B3 family protein;(source:Araport11)	NA	IR	AT2G24690_c3	AT2G24690_ID17	gun1_3h	WT_3h
AT2G24690	Transcriptional factor B3 family protein;(source:Araport11)	NA	IR	AT2G24690_s4	AT2G24690_ID17	gun1_3h	WT_3h
AT2G24690	Transcriptional factor B3 family protein;(source:Araport11)	NA	MES	AT2G24690_s4	AT2G24690_ID17	gun1_3h	WT_3h
AT2G25080	Encodes glutathione peroxidase. The mRNA is cell-to-cell mobile.	ATGPX1,GPX1,GPXL1	A5	AT2G25080_P1	AT2G25080_ID1	gun1_3h	WT_3h
AT2G25710	Encodes a dual-targeted biotin holocarboxylase synthetase that can localize to the chloroplast and the cytosol. In vitro, it has been shown to catalyze the addition of biotin to the BCCP subunit of acetyl-CoA carboxylase and it can also biotinylate methylcrotonyl-CoA carboxylase. A small upstream ORF in the 5'UTR (uORF24) regulates the differential targeting of this enzyme.	HCS1	IR	AT2G25710_P1	AT2G25710_P2	gun1_3h	WT_3h
AT2G25710	Encodes a dual-targeted biotin holocarboxylase synthetase that can localize to the chloroplast and the cytosol. In vitro, it has been shown to catalyze the addition of biotin to the BCCP subunit of acetyl-CoA carboxylase and it can also biotinylate methylcrotonyl-CoA carboxylase. A small upstream ORF in the 5'UTR (uORF24) regulates the differential targeting of this enzyme.	HCS1	A3	AT2G25710_P1	AT2G25710_P5	gun1_3h	WT_3h
AT2G25710	Encodes a dual-targeted biotin holocarboxylase synthetase that can localize to the chloroplast and the cytosol. In vitro, it has been shown to catalyze the addition of biotin to the BCCP subunit of acetyl-CoA carboxylase and it can also biotinylate methylcrotonyl-CoA carboxylase. A small upstream ORF in the 5'UTR (uORF24) regulates the differential targeting of this enzyme.	HCS1	IR	AT2G25710_P1	AT2G25710_P5	gun1_3h	WT_3h
AT2G26280	smr (Small MutS Related) domain-containing protein	CID7	ES	AT2G26280.1	AT2G26280_JC4	gun1_3h	WT_3h
AT2G26280	smr (Small MutS Related) domain-containing protein	CID7	IR	AT2G26280.1	AT2G26280_JC4	gun1_3h	WT_3h
AT2G26310	Encodes a plastid stroma localized fatty acid binding protein.	AtFAP2,FAP2	ES	AT2G26310_P3	AT2G26310_c1	gun1_3h	WT_3h
AT2G26310	Encodes a plastid stroma localized fatty acid binding protein.	AtFAP2,FAP2	IR	AT2G26310_P3	AT2G26310_c1	gun1_3h	WT_3h
AT2G26310	Encodes a plastid stroma localized fatty acid binding protein.	AtFAP2,FAP2	IR	AT2G26310_P3	AT2G26310_P1	gun1_3h	WT_3h
AT2G26650	Encodes AKT1, a member of the Shaker family inward rectifying potassium channel predominantly expressed in predominantly in root hairs and root endodermis. This family includes five groups based on phylogenetic analysis (FEBS Letters (2007) 581: 2357): I (inward rectifying channel): AKT1 (AT2G26650), AKT5 (AT4G32500) and SPIK (also known as AKT6, AT2G25600); II (inward rectifying channel): KAT1 (…	AKT1,ATAKT1,KT1	IR	AT2G26650_P2	AT2G26650_P1	gun1_3h	WT_3h
AT2G26810	Putative methyltransferase family protein;(source:Araport11)	NA	IR	AT2G26810_P2	AT2G26810_JS1	gun1_3h	WT_3h
AT2G26810	Putative methyltransferase family protein;(source:Araport11)	NA	ES	AT2G26810_P2	AT2G26810_JS3	gun1_3h	WT_3h
AT2G26810	Putative methyltransferase family protein;(source:Araport11)	NA	IR	AT2G26810_P2	AT2G26810_JS3	gun1_3h	WT_3h
AT2G26810	Putative methyltransferase family protein;(source:Araport11)	NA	IR	AT2G26810_P2	AT2G26810_P4	gun1_3h	WT_3h
AT2G27000	member of CYP705A	CYP705A8	A3	AT2G27000_s1	AT2G27000_P1	gun1_3h	WT_3h
AT2G28320	Pleckstrin homology (PH) and lipid-binding START domains-containing protein;(source:Araport11)	NA	A5	AT2G28320_c1	AT2G28320_ID9	gun1_3h	WT_3h
AT2G28320	Pleckstrin homology (PH) and lipid-binding START domains-containing protein;(source:Araport11)	NA	IR	AT2G28320_c1	AT2G28320_ID9	gun1_3h	WT_3h
AT2G28320	Pleckstrin homology (PH) and lipid-binding START domains-containing protein;(source:Araport11)	NA	A5	AT2G28320_c1	AT2G28320_P1	gun1_3h	WT_3h
AT2G28620	Mutants have radially swollen roots but do not exhibit defects in abundance or orientation of cortical microtubules, nor are microfibrils reduced. Cellulose synthesis is also unchanged with respect to wild type. There is a disruption in the normal pattern of cell wall placement.	RSW7,RSW7	A5	AT2G28620_JS5	AT2G28620_JS1	gun1_3h	WT_3h
AT2G28760	Encodes a cytosolic isoform of UDP-glucuronic acid decarboxylase.	UXS6	ES	AT2G28760_P2	AT2G28760_P4	gun1_3h	WT_3h
AT2G28760	Encodes a cytosolic isoform of UDP-glucuronic acid decarboxylase.	UXS6	IR	AT2G28760_P2	AT2G28760_P4	gun1_3h	WT_3h
AT2G28760	Encodes a cytosolic isoform of UDP-glucuronic acid decarboxylase.	UXS6	A5	AT2G28760_P2	AT2G28760_s2	gun1_3h	WT_3h
AT2G28760	Encodes a cytosolic isoform of UDP-glucuronic acid decarboxylase.	UXS6	ES	AT2G28760_P2	AT2G28760_s2	gun1_3h	WT_3h
AT2G29525	Inositol phosphorylceramide synthase	AtIPCS3	A3	AT2G29525_ID3	AT2G29525.3	gun1_3h	WT_3h
AT2G29525	Inositol phosphorylceramide synthase	AtIPCS3	IR	AT2G29525_ID3	AT2G29525.3	gun1_3h	WT_3h
AT2G29525	Inositol phosphorylceramide synthase	AtIPCS3	IR	AT2G29525_ID3	AT2G29525_ID1	gun1_3h	WT_3h
AT2G29525	Inositol phosphorylceramide synthase	AtIPCS3	IR	AT2G29525_ID3	AT2G29525_ID4	gun1_3h	WT_3h
AT2G29525	Inositol phosphorylceramide synthase	AtIPCS3	A5	AT2G29525_ID3	AT2G29525_P1	gun1_3h	WT_3h
AT2G29525	Inositol phosphorylceramide synthase	AtIPCS3	IR	AT2G29525_ID3	AT2G29525_P1	gun1_3h	WT_3h
AT2G30170	Encodes a chloroplast PP2C phosphatase that is required for efficient dephosphorylation of PSII proteins and involved in light acclimation.Loss of function enhances immunity to bacterial pathogens.	PBCP	IR	AT2G30170_P1	AT2G30170_P6	gun1_3h	WT_3h
AT2G31370	Basic-leucine zipper (bZIP) transcription factor family protein;(source:Araport11)	AtbZIP59,PosF21	IR	AT2G31370_P1	AT2G31370_P4	gun1_3h	WT_3h
AT2G31580	ICA1 is a nuclear localized member of the tRNA(His) guanylyl transferase superfamily. Loss of function alleles show increased sensitivity to growth at high temperatures defects in cell cycle progression and DNA repair.	ICA1	A3	AT2G31580_ID7	AT2G31580_P5	gun1_3h	WT_3h
AT2G31580	ICA1 is a nuclear localized member of the tRNA(His) guanylyl transferase superfamily. Loss of function alleles show increased sensitivity to growth at high temperatures defects in cell cycle progression and DNA repair.	ICA1	A5	AT2G31580_ID7	AT2G31580_P5	gun1_3h	WT_3h
AT2G31580	ICA1 is a nuclear localized member of the tRNA(His) guanylyl transferase superfamily. Loss of function alleles show increased sensitivity to growth at high temperatures defects in cell cycle progression and DNA repair.	ICA1	IR	AT2G31580_ID26	AT2G31580_P5	gun1_3h	WT_3h
AT2G31730	basic helix-loop-helix (bHLH) DNA-binding superfamily protein;(source:Araport11)	NA	A3	AT2G31730_JC4	AT2G31730_P1	gun1_3h	WT_3h
AT2G32320	Interacts genetically with its homolog ICA1; alters growth and flowering time plasticity in relation to temperature. Mutants display effects on growth, flowering and plant development, and ploidy level depending on ambient temperature (effects specific at >27C).	NA	IR	AT2G32320_ID67	AT2G32320_ID68	gun1_3h	WT_3h
AT2G32320	Interacts genetically with its homolog ICA1; alters growth and flowering time plasticity in relation to temperature. Mutants display effects on growth, flowering and plant development, and ploidy level depending on ambient temperature (effects specific at >27C).	NA	A3	AT2G32320_ID67	AT2G32320_P1	gun1_3h	WT_3h
AT2G32415	Polynucleotidyl transferase, ribonuclease H fold protein with HRDC domain-containing protein;(source:Araport11)	AtRRP6L3,RRP6L3	A3	AT2G32415_c2	AT2G32415_JS3	gun1_3h	WT_3h
AT2G32415	Polynucleotidyl transferase, ribonuclease H fold protein with HRDC domain-containing protein;(source:Araport11)	AtRRP6L3,RRP6L3	A3	AT2G32415_c2	AT2G32415_P3	gun1_3h	WT_3h
AT2G34770	encodes a fatty acid hydroxylase, required for the AtBI-1-mediated suppression of programmed cell death.	ATFAH1,FAH1	ES	AT2G34770.1	AT2G34770_ID5	gun1_3h	WT_3h
AT2G35630	Member of the MAP215 family of microtubule-associated proteins required to establish interphase arrays of cortical microtubules.Mutants have defects in cytokinesis during pollen development. Vegetative phenotypes observed in temperature sensitive mutants include left-handed organ twisting, isotropic cell expansion and impairment of root hair polarity. The mRNA is cell-to-cell mobile.	GEM1,MOR1	IR	AT2G35630_P1	AT2G35630_JS2	gun1_3h	WT_3h
AT2G36620	RPL24A encodes ribosomal protein L24, homolog of cytosolic RPL24, found in archaea and higher eukaryotes. Arabidopsis has two RPL24 homologs, RPL24A (AT2G36620) and RPL24B (AT3G53020).	RPL24A	A3	AT2G36620_P1	AT2G36620_ID24	gun1_3h	WT_3h
AT2G36620	RPL24A encodes ribosomal protein L24, homolog of cytosolic RPL24, found in archaea and higher eukaryotes. Arabidopsis has two RPL24 homologs, RPL24A (AT2G36620) and RPL24B (AT3G53020).	RPL24A	A5	AT2G36620_P1	AT2G36620_ID24	gun1_3h	WT_3h
AT2G37040	Encodes PAL1, a phenylalanine ammonia-lyase. Arabidopsis has four PALs: AT2G37040 (PAL1), AT3G53260 (PAL2), AT5G04230 (PAL3) and AT3G10340 (PAL4).	ATPAL1,PAL1	IR	AT2G37040_P1	AT2G37040_c1	gun1_3h	WT_3h
AT2G37620	Member of the actin gene family. Expressed in mature pollen.	AAc1,ACT1	A5	AT2G37620_P1	AT2G37620_c1	gun1_3h	WT_3h
AT2G37940	Inositol phosphorylceramide synthase 2;(source:Araport11)	AtIPCS2,ERH1	IR	AT2G37940_P2	AT2G37940_P1	gun1_3h	WT_3h
AT2G38130	Encodes the Arabidopsis homolog of the yeast protein MAK3, a component of the N-terminal acetyltransferase complex C. In mutant plants, synthesis of plastome-encoded photosystem II core proteins D1 and CP47 is affected resulting in fewer thylakoid multiprotein complexes.	ATMAK3	A3	AT2G38130_P1	AT2G38130_P2	gun1_3h	WT_3h
AT2G38550	Mediates fatty acid transport from plastid.	NA	ES	AT2G38550_P1	AT2G38550_ID4	gun1_3h	WT_3h
AT2G38550	Mediates fatty acid transport from plastid.	NA	IR	AT2G38550_P1	AT2G38550_s1	gun1_3h	WT_3h
AT2G38880	Encodes a transcription factor from the nuclear factor Y (NF-Y) family, AtNF-YB1. Confers drought tolerance.	ATHAP3,ATNF-YB1,HAP3,HAP3A,NF-YB1	A5	AT2G38880_s1	AT2G38880.6	gun1_3h	WT_3h
AT2G38880	Encodes a transcription factor from the nuclear factor Y (NF-Y) family, AtNF-YB1. Confers drought tolerance.	ATHAP3,ATNF-YB1,HAP3,HAP3A,NF-YB1	ES	AT2G38880_s1	AT2G38880.6	gun1_3h	WT_3h
AT2G38880	Encodes a transcription factor from the nuclear factor Y (NF-Y) family, AtNF-YB1. Confers drought tolerance.	ATHAP3,ATNF-YB1,HAP3,HAP3A,NF-YB1	IR	AT2G38880_s1	AT2G38880.6	gun1_3h	WT_3h
AT2G38880	Encodes a transcription factor from the nuclear factor Y (NF-Y) family, AtNF-YB1. Confers drought tolerance.	ATHAP3,ATNF-YB1,HAP3,HAP3A,NF-YB1	A3	AT2G38880_s1	AT2G38880_P1	gun1_3h	WT_3h
AT2G38880	Encodes a transcription factor from the nuclear factor Y (NF-Y) family, AtNF-YB1. Confers drought tolerance.	ATHAP3,ATNF-YB1,HAP3,HAP3A,NF-YB1	A5	AT2G38880_s1	AT2G38880_P1	gun1_3h	WT_3h
AT2G38880	Encodes a transcription factor from the nuclear factor Y (NF-Y) family, AtNF-YB1. Confers drought tolerance.	ATHAP3,ATNF-YB1,HAP3,HAP3A,NF-YB1	IR	AT2G38880_s1	AT2G38880_P1	gun1_3h	WT_3h
AT2G38880	Encodes a transcription factor from the nuclear factor Y (NF-Y) family, AtNF-YB1. Confers drought tolerance.	ATHAP3,ATNF-YB1,HAP3,HAP3A,NF-YB1	A3	AT2G38880_P3	AT2G38880_P6	gun1_3h	WT_3h
AT2G38880	Encodes a transcription factor from the nuclear factor Y (NF-Y) family, AtNF-YB1. Confers drought tolerance.	ATHAP3,ATNF-YB1,HAP3,HAP3A,NF-YB1	A3	AT2G38880_P5	AT2G38880_P6	gun1_3h	WT_3h
AT2G38880	Encodes a transcription factor from the nuclear factor Y (NF-Y) family, AtNF-YB1. Confers drought tolerance.	ATHAP3,ATNF-YB1,HAP3,HAP3A,NF-YB1	A5	AT2G38880_P5	AT2G38880_P6	gun1_3h	WT_3h
AT2G38880	Encodes a transcription factor from the nuclear factor Y (NF-Y) family, AtNF-YB1. Confers drought tolerance.	ATHAP3,ATNF-YB1,HAP3,HAP3A,NF-YB1	A5	AT2G38880_P3	AT2G38880_P6	gun1_3h	WT_3h
AT2G38880	Encodes a transcription factor from the nuclear factor Y (NF-Y) family, AtNF-YB1. Confers drought tolerance.	ATHAP3,ATNF-YB1,HAP3,HAP3A,NF-YB1	A5	AT2G38880_s1	AT2G38880_P6	gun1_3h	WT_3h
AT2G38880	Encodes a transcription factor from the nuclear factor Y (NF-Y) family, AtNF-YB1. Confers drought tolerance.	ATHAP3,ATNF-YB1,HAP3,HAP3A,NF-YB1	IR	AT2G38880_P5	AT2G38880_P6	gun1_3h	WT_3h
AT2G38880	Encodes a transcription factor from the nuclear factor Y (NF-Y) family, AtNF-YB1. Confers drought tolerance.	ATHAP3,ATNF-YB1,HAP3,HAP3A,NF-YB1	IR	AT2G38880_s1	AT2G38880_P6	gun1_3h	WT_3h
AT2G38880	Encodes a transcription factor from the nuclear factor Y (NF-Y) family, AtNF-YB1. Confers drought tolerance.	ATHAP3,ATNF-YB1,HAP3,HAP3A,NF-YB1	A5	AT2G38880_s1	AT2G38880_P9	gun1_3h	WT_3h
AT2G38880	Encodes a transcription factor from the nuclear factor Y (NF-Y) family, AtNF-YB1. Confers drought tolerance.	ATHAP3,ATNF-YB1,HAP3,HAP3A,NF-YB1	IR	AT2G38880_s1	AT2G38880_P9	gun1_3h	WT_3h
AT2G38980	pseudogene of cationic amino acid transporter 4;(source:Araport11)	NA	A3	AT2G38980_c5	AT2G38980_c2	gun1_3h	WT_3h
AT2G38980	pseudogene of cationic amino acid transporter 4;(source:Araport11)	NA	ES	AT2G38980_c5	AT2G38980_c2	gun1_3h	WT_3h
AT2G38980	pseudogene of cationic amino acid transporter 4;(source:Araport11)	NA	A3	AT2G38980_c5	AT2G38980_ID20	gun1_3h	WT_3h
AT2G38980	pseudogene of cationic amino acid transporter 4;(source:Araport11)	NA	ES	AT2G38980_c5	AT2G38980_ID20	gun1_3h	WT_3h
AT2G38980	pseudogene of cationic amino acid transporter 4;(source:Araport11)	NA	IR	AT2G38980_c5	AT2G38980_ID20	gun1_3h	WT_3h
AT2G39280	Ypt/Rab-GAP domain of gyp1p superfamily protein;(source:Araport11)	NA	A3	AT2G39280_c3	AT2G39280_c4	gun1_3h	WT_3h
AT2G39280	Ypt/Rab-GAP domain of gyp1p superfamily protein;(source:Araport11)	NA	A5	AT2G39280_c3	AT2G39280_c4	gun1_3h	WT_3h
AT2G39280	Ypt/Rab-GAP domain of gyp1p superfamily protein;(source:Araport11)	NA	IR	AT2G39280_c3	AT2G39280_c4	gun1_3h	WT_3h
AT2G39280	Ypt/Rab-GAP domain of gyp1p superfamily protein;(source:Araport11)	NA	A5	AT2G39280_c3	AT2G39280_ID65	gun1_3h	WT_3h
AT2G39280	Ypt/Rab-GAP domain of gyp1p superfamily protein;(source:Araport11)	NA	A3	AT2G39280_c3	AT2G39280_P1	gun1_3h	WT_3h
AT2G40110	Yippee family putative zinc-binding protein;(source:Araport11)	NA	IR	AT2G40110_P1	AT2G40110_ID5	gun1_3h	WT_3h
AT2G40340	Encodes a member of the DREB subfamily A-2 of ERF/AP2 transcription factor family. The protein contains one AP2 domain. There are eight members in this subfamily including DREB2A AND DREB2B that are involved in response to drought.	AtERF48,DREB2C	A5	AT2G40340_P1	AT2G40340_JS1	gun1_3h	WT_3h
AT2G40340	Encodes a member of the DREB subfamily A-2 of ERF/AP2 transcription factor family. The protein contains one AP2 domain. There are eight members in this subfamily including DREB2A AND DREB2B that are involved in response to drought.	AtERF48,DREB2C	A5	AT2G40340_P3	AT2G40340_JS1	gun1_3h	WT_3h
AT2G40340	Encodes a member of the DREB subfamily A-2 of ERF/AP2 transcription factor family. The protein contains one AP2 domain. There are eight members in this subfamily including DREB2A AND DREB2B that are involved in response to drought.	AtERF48,DREB2C	ES	AT2G40340_P1	AT2G40340_JS1	gun1_3h	WT_3h
AT2G40340	Encodes a member of the DREB subfamily A-2 of ERF/AP2 transcription factor family. The protein contains one AP2 domain. There are eight members in this subfamily including DREB2A AND DREB2B that are involved in response to drought.	AtERF48,DREB2C	ES	AT2G40340_P3	AT2G40340_JS1	gun1_3h	WT_3h
AT2G40340	Encodes a member of the DREB subfamily A-2 of ERF/AP2 transcription factor family. The protein contains one AP2 domain. There are eight members in this subfamily including DREB2A AND DREB2B that are involved in response to drought.	AtERF48,DREB2C	IR	AT2G40340_P3	AT2G40340_JS1	gun1_3h	WT_3h
AT2G40340	Encodes a member of the DREB subfamily A-2 of ERF/AP2 transcription factor family. The protein contains one AP2 domain. There are eight members in this subfamily including DREB2A AND DREB2B that are involved in response to drought.	AtERF48,DREB2C	ES	AT2G40340_P1	AT2G40340_P2	gun1_3h	WT_3h
AT2G40340	Encodes a member of the DREB subfamily A-2 of ERF/AP2 transcription factor family. The protein contains one AP2 domain. There are eight members in this subfamily including DREB2A AND DREB2B that are involved in response to drought.	AtERF48,DREB2C	ES	AT2G40340_P3	AT2G40340_P2	gun1_3h	WT_3h
AT2G40340	Encodes a member of the DREB subfamily A-2 of ERF/AP2 transcription factor family. The protein contains one AP2 domain. There are eight members in this subfamily including DREB2A AND DREB2B that are involved in response to drought.	AtERF48,DREB2C	IR	AT2G40340_P3	AT2G40340_P2	gun1_3h	WT_3h
AT2G40340	Encodes a member of the DREB subfamily A-2 of ERF/AP2 transcription factor family. The protein contains one AP2 domain. There are eight members in this subfamily including DREB2A AND DREB2B that are involved in response to drought.	AtERF48,DREB2C	IR	AT2G40340_P1	AT2G40340_P2	gun1_3h	WT_3h
AT2G40340	Encodes a member of the DREB subfamily A-2 of ERF/AP2 transcription factor family. The protein contains one AP2 domain. There are eight members in this subfamily including DREB2A AND DREB2B that are involved in response to drought.	AtERF48,DREB2C	ES	AT2G40340_P3	AT2G40340_P4	gun1_3h	WT_3h
AT2G40340	Encodes a member of the DREB subfamily A-2 of ERF/AP2 transcription factor family. The protein contains one AP2 domain. There are eight members in this subfamily including DREB2A AND DREB2B that are involved in response to drought.	AtERF48,DREB2C	ES	AT2G40340_P1	AT2G40340_P4	gun1_3h	WT_3h
AT2G40340	Encodes a member of the DREB subfamily A-2 of ERF/AP2 transcription factor family. The protein contains one AP2 domain. There are eight members in this subfamily including DREB2A AND DREB2B that are involved in response to drought.	AtERF48,DREB2C	IR	AT2G40340_P1	AT2G40340_P4	gun1_3h	WT_3h
AT2G40340	Encodes a member of the DREB subfamily A-2 of ERF/AP2 transcription factor family. The protein contains one AP2 domain. There are eight members in this subfamily including DREB2A AND DREB2B that are involved in response to drought.	AtERF48,DREB2C	IR	AT2G40340_P3	AT2G40340_P4	gun1_3h	WT_3h
AT2G40340	Encodes a member of the DREB subfamily A-2 of ERF/AP2 transcription factor family. The protein contains one AP2 domain. There are eight members in this subfamily including DREB2A AND DREB2B that are involved in response to drought.	AtERF48,DREB2C	A5	AT2G40340_P3	AT2G40340_s2	gun1_3h	WT_3h
AT2G40340	Encodes a member of the DREB subfamily A-2 of ERF/AP2 transcription factor family. The protein contains one AP2 domain. There are eight members in this subfamily including DREB2A AND DREB2B that are involved in response to drought.	AtERF48,DREB2C	A5	AT2G40340_P1	AT2G40340_s2	gun1_3h	WT_3h
AT2G40340	Encodes a member of the DREB subfamily A-2 of ERF/AP2 transcription factor family. The protein contains one AP2 domain. There are eight members in this subfamily including DREB2A AND DREB2B that are involved in response to drought.	AtERF48,DREB2C	ES	AT2G40340_P1	AT2G40340_s2	gun1_3h	WT_3h
AT2G40340	Encodes a member of the DREB subfamily A-2 of ERF/AP2 transcription factor family. The protein contains one AP2 domain. There are eight members in this subfamily including DREB2A AND DREB2B that are involved in response to drought.	AtERF48,DREB2C	ES	AT2G40340_P3	AT2G40340_s2	gun1_3h	WT_3h
AT2G40340	Encodes a member of the DREB subfamily A-2 of ERF/AP2 transcription factor family. The protein contains one AP2 domain. There are eight members in this subfamily including DREB2A AND DREB2B that are involved in response to drought.	AtERF48,DREB2C	IR	AT2G40340_P1	AT2G40340_s2	gun1_3h	WT_3h
AT2G40935	PLAC8 family protein;(source:Araport11)	NA	IR	AT2G40935_JS12	AT2G40935_ID5	gun1_3h	WT_3h
AT2G41350	Encodes AUG1, likely to be in an augmin-like complex with AUG3.	AtAUG1,AUG1,EMB2819	A3	AT2G41350_ID1	AT2G41350_P1	gun1_3h	WT_3h
AT2G41710	Integrase-type DNA-binding superfamily protein;(source:Araport11)	NA	A3	AT2G41710.2	AT2G41710.1	gun1_3h	WT_3h
AT2G41840	Ribosomal protein S5 family protein;(source:Araport11)	NA	A3	AT2G41840_ID20	AT2G41840_ID19	gun1_3h	WT_3h
AT2G41840	Ribosomal protein S5 family protein;(source:Araport11)	NA	A3	AT2G41840_P1	AT2G41840_ID19	gun1_3h	WT_3h
AT2G41840	Ribosomal protein S5 family protein;(source:Araport11)	NA	A5	AT2G41840_ID20	AT2G41840_ID19	gun1_3h	WT_3h
AT2G41840	Ribosomal protein S5 family protein;(source:Araport11)	NA	IR	AT2G41840_P1	AT2G41840_ID19	gun1_3h	WT_3h
AT2G41880	Guanylate kinase. Involved in nucleotide metabolism.	AGK1,GK-1	A5	AT2G41880_s2	AT2G41880_P5	gun1_3h	WT_3h
AT2G41880	Guanylate kinase. Involved in nucleotide metabolism.	AGK1,GK-1	ES	AT2G41880_s2	AT2G41880_P5	gun1_3h	WT_3h
AT2G41880	Guanylate kinase. Involved in nucleotide metabolism.	AGK1,GK-1	IR	AT2G41880_P1	AT2G41880_P5	gun1_3h	WT_3h
AT2G41880	Guanylate kinase. Involved in nucleotide metabolism.	AGK1,GK-1	IR	AT2G41880_s2	AT2G41880_P5	gun1_3h	WT_3h
AT2G41970	Encodes MRI, a plasma membrane-localized member of the RLCK-VIII subfamily. Preferentially expressed in both pollen tubes and root hairs. mri-knockout mutants display spontaneous pollen tube and root-hair bursting.	MRI	IR	AT2G41970_P2	AT2G41970_P1	gun1_3h	WT_3h
AT2G42300	Together with bHLH60 associates with phytochrome interacting factor 7 to regulate hypocotyl elongation.	NA	A5	AT2G42300_P1	AT2G42300_s1	gun1_3h	WT_3h
AT2G42700	Member of MAG2 complex on the ER that is responsible for efficient transport of seed storage proteins, functions in protein transport between the ER and Golgi apparatus Sec1 domain, involved in the development of vegetative organs. Required for proper maturation of seed storage proteins.	MIP3	IR	AT2G42700_P3	AT2G42700_P1	gun1_3h	WT_3h
AT2G45990	ribosomal RNA small subunit methyltransferase G;(source:Araport11)	NA	IR	AT2G45990.2	AT2G45990_ID3	gun1_3h	WT_3h
AT2G46790	Pseudo-response regulator PRR9. Involved in clock function. PRR7 and PRR9 are partially redundant essential components of a temperature-sensitive circadian system. CCA1 and LHY had a positive effect on PRR9. Interact with TOC1 in a yeast two-hybrid assay. Acts as transcriptional repressor of CCA1 and LHY. Acts additively with EC, PRR5 and PRR7 to regulate hypocotyl growth under photoperiodic cond…	APRR9,PRR9,TL1	IR	AT2G46790_P3	AT2G46790_P1	gun1_3h	WT_3h
AT2G46790	Pseudo-response regulator PRR9. Involved in clock function. PRR7 and PRR9 are partially redundant essential components of a temperature-sensitive circadian system. CCA1 and LHY had a positive effect on PRR9. Interact with TOC1 in a yeast two-hybrid assay. Acts as transcriptional repressor of CCA1 and LHY. Acts additively with EC, PRR5 and PRR7 to regulate hypocotyl growth under photoperiodic cond…	APRR9,PRR9,TL1	A5	AT2G46790_P3	AT2G46790_P5	gun1_3h	WT_3h
AT2G47220	Member of the plant-specific DUF724 protein family. Arabidopsis has 10 DUF724 proteins. Loss of function mutant has a WT phenotype	ATDUF5,DUF5	A3	AT2G47220.1	AT2G47220_ID1	gun1_3h	WT_3h
AT2G47220	Member of the plant-specific DUF724 protein family. Arabidopsis has 10 DUF724 proteins. Loss of function mutant has a WT phenotype	ATDUF5,DUF5	A5	AT2G47220_ID3	AT2G47220_ID1	gun1_3h	WT_3h
AT2G47220	Member of the plant-specific DUF724 protein family. Arabidopsis has 10 DUF724 proteins. Loss of function mutant has a WT phenotype	ATDUF5,DUF5	IR	AT2G47220_ID3	AT2G47220_ID1	gun1_3h	WT_3h
AT2G47220	Member of the plant-specific DUF724 protein family. Arabidopsis has 10 DUF724 proteins. Loss of function mutant has a WT phenotype	ATDUF5,DUF5	IR	AT2G47220.1	AT2G47220_ID1	gun1_3h	WT_3h
AT2G48100	Exonuclease family protein;(source:Araport11)	NA	ES	AT2G48100_P5	AT2G48100.4	gun1_3h	WT_3h
AT2G48100	Exonuclease family protein;(source:Araport11)	NA	IR	AT2G48100_P5	AT2G48100.4	gun1_3h	WT_3h
AT2G48100	Exonuclease family protein;(source:Araport11)	NA	IR	AT2G48100_P1	AT2G48100.4	gun1_3h	WT_3h
AT2G48100	Exonuclease family protein;(source:Araport11)	NA	ES	AT2G48100_P1	AT2G48100_P6	gun1_3h	WT_3h
AT2G48100	Exonuclease family protein;(source:Araport11)	NA	IR	AT2G48100_P5	AT2G48100_P6	gun1_3h	WT_3h
AT2G48100	Exonuclease family protein;(source:Araport11)	NA	IR	AT2G48100_P1	AT2G48100_P6	gun1_3h	WT_3h
AT3G01490	Belongs to the Raf-like kinase subfamily of the mitogen-activated protein kinase kinase kinase (MAPKKK) family. Negatively regulates stomatal opening by negatively regulating plasma membrane H+-ATPase phosphorylation.	NA	IR	AT3G01490.1	AT3G01490_JC5	gun1_3h	WT_3h
AT3G01490	Belongs to the Raf-like kinase subfamily of the mitogen-activated protein kinase kinase kinase (MAPKKK) family. Negatively regulates stomatal opening by negatively regulating plasma membrane H+-ATPase phosphorylation.	NA	IR	AT3G01490.1	AT3G01490_P2	gun1_3h	WT_3h
AT3G01500	Encodes a putative beta-carbonic anhydrase betaCA1. Together with betaCA4 (At1g70410) regulates CO2-controlled stomatal movements in guard cells, as well as attenuates immunity. Differential CA gene expression in response to changing atmospheric CO2 conditions contribute to altered disease resistance levels. Activated by OXS2 under the treatment of salt.	ATBCA1,ATSABP3,CA1,SABP3	IR	AT3G01500_ID11	AT3G01500.2	gun1_3h	WT_3h
AT3G02065	P-loop containing nucleoside triphosphate hydrolases superfamily protein;(source:Araport11)	NA	IR	AT3G02065.3	AT3G02065.2	gun1_3h	WT_3h
AT3G04460	RING finger protein involved in peroxisome biogenesis. Also involved in peroxisomal import of nitric oxide synthase. Has been demonstrated to have E3 ubiquitin ligase activity.	APM4,ATPEX12,PEX12	A5	AT3G04460_P1	AT3G04460_ID2	gun1_3h	WT_3h
AT3G04500	RNA-binding (RRM/RBD/RNP motifs) family protein;(source:Araport11)	NA	A3	AT3G04500_c2	AT3G04500_c1	gun1_3h	WT_3h
AT3G05220	Heavy metal transport/detoxification superfamily protein;(source:Araport11)	NA	A3	AT3G05220_P1	AT3G05220_c1	gun1_3h	WT_3h
AT3G05220	Heavy metal transport/detoxification superfamily protein;(source:Araport11)	NA	IR	AT3G05220_P1	AT3G05220_c1	gun1_3h	WT_3h
AT3G05910	Pectinacetylesterase family protein;(source:Araport11)	AtPAE12	ES	AT3G05910_P1	AT3G05910_ID2	gun1_3h	WT_3h
AT3G06860	Encodes a multifunctional protein. Involved in peroxisomal fatty acid beta oxidation. Loss-of-function mutant lacks hydroxyacyl-CoA dehydrogenase activity and have reduced levels of long-chain enoyl-CoA hydratase activity. The mutant has fewer but larger peroxisomes. The mRNA is cell-to-cell mobile.	ATMFP2,MFP2	A3	AT3G06860_P1	AT3G06860_ID8	gun1_3h	WT_3h
AT3G06860	Encodes a multifunctional protein. Involved in peroxisomal fatty acid beta oxidation. Loss-of-function mutant lacks hydroxyacyl-CoA dehydrogenase activity and have reduced levels of long-chain enoyl-CoA hydratase activity. The mutant has fewer but larger peroxisomes. The mRNA is cell-to-cell mobile.	ATMFP2,MFP2	ES	AT3G06860_P1	AT3G06860_ID8	gun1_3h	WT_3h
AT3G07200	RING/U-box superfamily protein;(source:Araport11)	NA	A3	AT3G07200_P1	AT3G07200_ID2	gun1_3h	WT_3h
AT3G07200	RING/U-box superfamily protein;(source:Araport11)	NA	A3	AT3G07200_P1	AT3G07200_s1	gun1_3h	WT_3h
AT3G07200	RING/U-box superfamily protein;(source:Araport11)	NA	A5	AT3G07200_P1	AT3G07200_s1	gun1_3h	WT_3h
AT3G07200	RING/U-box superfamily protein;(source:Araport11)	NA	IR	AT3G07200_P1	AT3G07200_s1	gun1_3h	WT_3h
AT3G07690	6-phosphogluconate dehydrogenase family protein;(source:Araport11)	NA	A3	AT3G07690_P1	AT3G07690_ID4	gun1_3h	WT_3h
AT3G07690	6-phosphogluconate dehydrogenase family protein;(source:Araport11)	NA	IR	AT3G07690_P1	AT3G07690_ID4	gun1_3h	WT_3h
AT3G07750	3-5-exoribonuclease family protein;(source:Araport11)	RRP42	A3	AT3G07750_P1	AT3G07750_ID6	gun1_3h	WT_3h
AT3G07750	3-5-exoribonuclease family protein;(source:Araport11)	RRP42	IR	AT3G07750_P1	AT3G07750_P2	gun1_3h	WT_3h
AT3G08510	Phosphoinositide-specific phospholipase C (PI-PLC), catalyzes hydrolysis of phosphatidylinositol 4,5-bisphosphate into inositol 1,4,5-trisphosphate and diacylglycerol. It is involved in auxin biosynthesis and signaling, modulating development of both male and female gametophytes. It also regulates MAMP-triggered immunity by modulating ROS production.	ATPLC2,PLC2	A3	AT3G08510_P1	AT3G08510_ID1	gun1_3h	WT_3h
AT3G08510	Phosphoinositide-specific phospholipase C (PI-PLC), catalyzes hydrolysis of phosphatidylinositol 4,5-bisphosphate into inositol 1,4,5-trisphosphate and diacylglycerol. It is involved in auxin biosynthesis and signaling, modulating development of both male and female gametophytes. It also regulates MAMP-triggered immunity by modulating ROS production.	ATPLC2,PLC2	A5	AT3G08510_P1	AT3G08510_ID1	gun1_3h	WT_3h
AT3G08510	Phosphoinositide-specific phospholipase C (PI-PLC), catalyzes hydrolysis of phosphatidylinositol 4,5-bisphosphate into inositol 1,4,5-trisphosphate and diacylglycerol. It is involved in auxin biosynthesis and signaling, modulating development of both male and female gametophytes. It also regulates MAMP-triggered immunity by modulating ROS production.	ATPLC2,PLC2	ES	AT3G08510_P1	AT3G08510_ID1	gun1_3h	WT_3h
AT3G08660	Phototropic-responsive NPH3 family protein;(source:Araport11)	NA	IR	AT3G08660_P1	AT3G08660_P2	gun1_3h	WT_3h
AT3G08660	Phototropic-responsive NPH3 family protein;(source:Araport11)	NA	IR	AT3G08660_P1	AT3G08660_P3	gun1_3h	WT_3h
AT3G08840	D-alanine-D-alanine ligase family;(source:Araport11)	NA	A3	AT3G08840_ID33	AT3G08840_ID168	gun1_3h	WT_3h
AT3G08840	D-alanine-D-alanine ligase family;(source:Araport11)	NA	ES	AT3G08840_ID33	AT3G08840_ID168	gun1_3h	WT_3h
AT3G08840	D-alanine-D-alanine ligase family;(source:Araport11)	NA	IR	AT3G08840_ID33	AT3G08840_ID168	gun1_3h	WT_3h
AT3G09735	S1FA-like DNA-binding protein;(source:Araport11)	NA	IR	AT3G09735_ID3	AT3G09735.1	gun1_3h	WT_3h
AT3G10090	Nucleic acid-binding, OB-fold-like protein;(source:Araport11)	NA	IR	AT3G10090_P1	AT3G10090_ID2	gun1_3h	WT_3h
AT3G11030	Encodes a member of the TBL (TRICHOME BIREFRINGENCE-LIKE) gene family containing a plant-specific DUF231 (domain of unknown function) domain. TBL gene family has 46 members, two of which (TBR/AT5G06700 and TBL3/AT5G01360) have been shown to be involved in the synthesis and deposition of secondary wall cellulose, presumably by influencing the esterification state of pectic polymers. A nomenclature…	TBL32	IR	AT3G11030_ID2	AT3G11030.1	gun1_3h	WT_3h
AT3G11220	A subunit of Elongator, a histone acetyl transferase complex, consisting of six subunits (ELP1?ELP6), that copurifies with the elongating RNAPII in yeast and humans. Three Arabidopsis thaliana genes, encoding homologs of the yeast Elongator subunits ELP1, ELP3 (histone acetyl transferase), and ELP4 are responsible for the narrow leaf phenotype in elongata mutants and for reduced root growth that …	AtELP4,ELO1	A5	AT3G11220_ID4	AT3G11220_P2	gun1_3h	WT_3h
AT3G11220	A subunit of Elongator, a histone acetyl transferase complex, consisting of six subunits (ELP1?ELP6), that copurifies with the elongating RNAPII in yeast and humans. Three Arabidopsis thaliana genes, encoding homologs of the yeast Elongator subunits ELP1, ELP3 (histone acetyl transferase), and ELP4 are responsible for the narrow leaf phenotype in elongata mutants and for reduced root growth that …	AtELP4,ELO1	IR	AT3G11220_ID4	AT3G11220_P2	gun1_3h	WT_3h
AT3G11745	transmembrane protein;(source:Araport11)	NA	IR	AT3G11745_ID1	AT3G11745_P1	gun1_3h	WT_3h
AT3G12250	basic leucine zipper transcription factor involved in the activation of SA-responsive genes.	BZIP45,TGA6	ES	AT3G12250_P2	AT3G12250_P1	gun1_3h	WT_3h
AT3G12280	Encodes a retinoblastoma homologue RETINOBLASTOMA-RELATED protein (RBR or RBR1). RBR controls nuclear proliferation in the female gametophyte. Also required for correct differentiation of male gametophytic cell types. Regulates stem cell maintenance in Arabidopsis roots. Involved in the determination of cell cycle arrest in G1 phase after sucrose starvation. RBR1 is also involved in regulation of…	ATRBR1,RB,RB1,RBR,RBR1	A3	AT3G12280.2	AT3G12280_P1	gun1_3h	WT_3h
AT3G14830	epstein-barr nuclear antigen;(source:Araport11)	NA	IR	AT3G14830_P1	AT3G14830_c2	gun1_3h	WT_3h
AT3G14830	epstein-barr nuclear antigen;(source:Araport11)	NA	IR	AT3G14830_P2	AT3G14830_c2	gun1_3h	WT_3h
AT3G14870	hypothetical protein (DUF641);(source:Araport11)	NA	ES	AT3G14870_s1	AT3G14870_P2	gun1_3h	WT_3h
AT3G15190	chloroplast 30S ribosomal protein S20;(source:Araport11)	PRPS20	A3	AT3G15190_P1	AT3G15190_ID1	gun1_3h	WT_3h
AT3G15190	chloroplast 30S ribosomal protein S20;(source:Araport11)	PRPS20	A5	AT3G15190_P1	AT3G15190_ID1	gun1_3h	WT_3h
AT3G15351	P53/DNA damage-regulated protein;(source:Araport11)	NA	IR	AT3G15351_P1	AT3G15351_P2	gun1_3h	WT_3h
AT3G15351	P53/DNA damage-regulated protein;(source:Araport11)	NA	IR	AT3G15351_P1	AT3G15351_P7	gun1_3h	WT_3h
AT3G15430	Regulator of chromosome condensation (RCC1) family protein;(source:Araport11)	NA	A3	AT3G15430_P2	AT3G15430_P3	gun1_3h	WT_3h
AT3G15430	Regulator of chromosome condensation (RCC1) family protein;(source:Araport11)	NA	A5	AT3G15430_P2	AT3G15430_P3	gun1_3h	WT_3h
AT3G15430	Regulator of chromosome condensation (RCC1) family protein;(source:Araport11)	NA	IR	AT3G15430_P2	AT3G15430_P3	gun1_3h	WT_3h
AT3G15500	Encodes an ATAF-like NAC-domain transcription factor that doesn't contain C-terminal sequences shared by CUC1, CUC2 and NAM. Note: this protein (AtNAC3) is not to be confused with the protein encoded by locus AT3G29035, which, on occasion, has also been referred to as AtNAC3. The mRNA is cell-to-cell mobile.	ANAC055,ANAC55,ATNAC3,NAC055,NAC3	IR	AT3G15500_ID2	AT3G15500_P1	gun1_3h	WT_3h
AT3G15730	Encodes phospholipase D alpha 1 (PLD alpha 1). Positive regulator of abscisic acid (ABA) mediated stomatal movements. PLD alpha 1 plays an important role in seed deterioration and aging in Arabidopsis. The mRNA is cell-to-cell mobile.	PLD,PLDALPHA1	IR	AT3G15730_P1	AT3G15730_s1	gun1_3h	WT_3h
AT3G15950	Similar to TSK-associating protein 1 (TSA1), contains 10 EFE repeats, a novel repeat sequence unique to plants. Expressed preferentially in the roots.Protein is localized to ER bodies- an endoplasmic reticulum derived structure. Loss of function mutations lack ER bodies.	NAI2	MES	AT3G15950_P1	AT3G15950_ID510	gun1_3h	WT_3h
AT3G16220	Putative eukaryotic LigT;(source:Araport11)	NA	A3	AT3G16220_P1	AT3G16220_ID1	gun1_3h	WT_3h
AT3G16220	Putative eukaryotic LigT;(source:Araport11)	NA	IR	AT3G16220_P1	AT3G16220_ID1	gun1_3h	WT_3h
AT3G16400	Encodes a nitrile-specifier protein NSP1 responsible for constitutive and herbivore-induced simple nitrile formation in rosette leaves. NSP1 is one out of five (At3g16400/NSP1, At2g33070/NSP2, At3g16390/NSP3, At3g16410/NSP4 and At5g48180/NSP5) A. thaliana epithiospecifier protein (ESP) homologues that promote simple nitrile, but not epithionitrile or thiocyanate formation. The mRNA is cell-to-cel…	ATMLP-470,ATNSP1,NSP1	IR	AT3G16400.2	AT3G16400_P1	gun1_3h	WT_3h
AT3G16520	UDP-glucosyl transferase 88A1;(source:Araport11)	UGT88A1	IR	AT3G16520_P3	AT3G16520_P2	gun1_3h	WT_3h
AT3G16565	threonyl and alanyl tRNA synthetase second additional domain-containing protein;(source:Araport11)	NA	IR	AT3G16565_ID66	AT3G16565_P1	gun1_3h	WT_3h
AT3G16565	threonyl and alanyl tRNA synthetase second additional domain-containing protein;(source:Araport11)	NA	A3	AT3G16565_c2	AT3G16565_P2	gun1_3h	WT_3h
AT3G16565	threonyl and alanyl tRNA synthetase second additional domain-containing protein;(source:Araport11)	NA	ES	AT3G16565_ID51	AT3G16565_P2	gun1_3h	WT_3h
AT3G16565	threonyl and alanyl tRNA synthetase second additional domain-containing protein;(source:Araport11)	NA	ES	AT3G16565_c2	AT3G16565_P2	gun1_3h	WT_3h
AT3G16565	threonyl and alanyl tRNA synthetase second additional domain-containing protein;(source:Araport11)	NA	IR	AT3G16565_ID66	AT3G16565_P2	gun1_3h	WT_3h
AT3G16565	threonyl and alanyl tRNA synthetase second additional domain-containing protein;(source:Araport11)	NA	IR	AT3G16565_ID51	AT3G16565_P2	gun1_3h	WT_3h
AT3G17611	RHOMBOID-like protein 14;(source:Araport11)	ATRBL10,ATRBL14,RBL10,RBL14	IR	AT3G17611_ID1	AT3G17611_ID2	gun1_3h	WT_3h
AT3G19515	apoptosis inhibitor;(source:Araport11)	NA	IR	AT3G19515_ID2	AT3G19515_P2	gun1_3h	WT_3h
AT3G19850	Phototropic-responsive NPH3 family protein;(source:Araport11)	NA	IR	AT3G19850_P1	AT3G19850_s1	gun1_3h	WT_3h
AT3G19850	Phototropic-responsive NPH3 family protein;(source:Araport11)	NA	IR	AT3G19850_JC5	AT3G19850_s1	gun1_3h	WT_3h
AT3G19900	hypothetical protein;(source:Araport11)	NA	IR	AT3G19900_s1	AT3G19900_P2	gun1_3h	WT_3h
AT3G20470	encodes a glycine-rich protein that is expressed more abundantly in immature seed pods than in stems and leaves. Expression is not detected in roots or flowers.	ATGRP-5,ATGRP5,GRP-5,GRP5	A3	AT3G20470_P1	AT3G20470_ID1	gun1_3h	WT_3h
AT3G20470	encodes a glycine-rich protein that is expressed more abundantly in immature seed pods than in stems and leaves. Expression is not detected in roots or flowers.	ATGRP-5,ATGRP5,GRP-5,GRP5	A5	AT3G20470_P1	AT3G20470_ID1	gun1_3h	WT_3h
AT3G20470	encodes a glycine-rich protein that is expressed more abundantly in immature seed pods than in stems and leaves. Expression is not detected in roots or flowers.	ATGRP-5,ATGRP5,GRP-5,GRP5	IR	AT3G20470_P1	AT3G20470_ID1	gun1_3h	WT_3h
AT3G20780	Encodes putative eukaryotic homolog of archaebacterial topoisomerase VI subunit B, TOP6B. Is essential for endoreduplication and is involved in cell expansion and cell proliferation. The hlq (harlequin) dwarf mutant has fewer root hair and leaf trichome. It has abnormal epidermal cell and accumulates callose.	ATTOP6B,BIN3,HLQ,HYP6,RHL3,TOP6B	A3	AT3G20780_s1	AT3G20780_JC2	gun1_3h	WT_3h
AT3G20780	Encodes putative eukaryotic homolog of archaebacterial topoisomerase VI subunit B, TOP6B. Is essential for endoreduplication and is involved in cell expansion and cell proliferation. The hlq (harlequin) dwarf mutant has fewer root hair and leaf trichome. It has abnormal epidermal cell and accumulates callose.	ATTOP6B,BIN3,HLQ,HYP6,RHL3,TOP6B	A5	AT3G20780_s1	AT3G20780_JC2	gun1_3h	WT_3h
AT3G20780	Encodes putative eukaryotic homolog of archaebacterial topoisomerase VI subunit B, TOP6B. Is essential for endoreduplication and is involved in cell expansion and cell proliferation. The hlq (harlequin) dwarf mutant has fewer root hair and leaf trichome. It has abnormal epidermal cell and accumulates callose.	ATTOP6B,BIN3,HLQ,HYP6,RHL3,TOP6B	A5	AT3G20780.1	AT3G20780_JC2	gun1_3h	WT_3h
AT3G20910	nuclear factor Y, subunit A9;(source:Araport11)	NF-YA9	A3	AT3G20910.1	AT3G20910_ID37	gun1_3h	WT_3h
AT3G20910	nuclear factor Y, subunit A9;(source:Araport11)	NF-YA9	A3	AT3G20910_ID16	AT3G20910_ID37	gun1_3h	WT_3h
AT3G20910	nuclear factor Y, subunit A9;(source:Araport11)	NF-YA9	A5	AT3G20910_ID16	AT3G20910_ID37	gun1_3h	WT_3h
AT3G22460	Encodes a member of a family of genes with O-acetylserine(thiol)lyase activity.	OASA2	IR	AT3G22460_ID2	AT3G22460_ID4	gun1_3h	WT_3h
AT3G23450	Kratos restricts cell death during differentiation of tracheary elements.	NA	A3	AT3G23450_P1	AT3G23450_P2	gun1_3h	WT_3h
AT3G23450	Kratos restricts cell death during differentiation of tracheary elements.	NA	A3	AT3G23450_P3	AT3G23450_P2	gun1_3h	WT_3h
AT3G23450	Kratos restricts cell death during differentiation of tracheary elements.	NA	A5	AT3G23450_P3	AT3G23450_P2	gun1_3h	WT_3h
AT3G23450	Kratos restricts cell death during differentiation of tracheary elements.	NA	IR	AT3G23450_P1	AT3G23450_P2	gun1_3h	WT_3h
AT3G23990	mitochondrial chaperonin HSP. assist in rapid assembly of the oligomeric protein structures in the mitochondria.	HSP60,HSP60-3B	A5	AT3G23990_P1	AT3G23990_ID2	gun1_3h	WT_3h
AT3G23990	mitochondrial chaperonin HSP. assist in rapid assembly of the oligomeric protein structures in the mitochondria.	HSP60,HSP60-3B	MES	AT3G23990_P1	AT3G23990_ID2	gun1_3h	WT_3h
AT3G24830	Ribosomal protein L13 family protein;(source:Araport11)	NA	A3	AT3G24830_P1	AT3G24830_ID3	gun1_3h	WT_3h
AT3G24830	Ribosomal protein L13 family protein;(source:Araport11)	NA	A5	AT3G24830_P1	AT3G24830_ID3	gun1_3h	WT_3h
AT3G24830	Ribosomal protein L13 family protein;(source:Araport11)	NA	ES	AT3G24830_P1	AT3G24830_ID3	gun1_3h	WT_3h
AT3G25495	pseudogene of leucine-rich repeat protein	NA	A3	AT3G25495_JS8	AT3G25495_s3	gun1_3h	WT_3h
AT3G25495	pseudogene of leucine-rich repeat protein	NA	ES	AT3G25495_JS8	AT3G25495_s3	gun1_3h	WT_3h
AT3G25495	pseudogene of leucine-rich repeat protein	NA	IR	AT3G25495_JS8	AT3G25495_s3	gun1_3h	WT_3h
AT3G26240	Cysteine/Histidine-rich C1 domain family protein. Accumulation of this protein is regulated by a cis-Natural Antisense RNA (cis-NAT).	NA	IR	AT3G26240_P1	AT3G26240_s1	gun1_3h	WT_3h
AT3G26310	putative cytochrome P450	CYP71B35	IR	AT3G26310_ID2	AT3G26310_P1	gun1_3h	WT_3h
AT3G26744	Encodes a MYC-like bHLH transcriptional activator that binds specifically to the MYC recognition sequences in the CBF3 promoter. It also binds to and inhibits the expression of ABI3. Mutants are defective in cold-regulated gene expression and ABA signaling druing seed germination.. Cold stress triggers protein degradation of nuclear GFPICE1 protein, and the RING finger protein HOS1 is required. S…	ATICE1,ICE1,SCRM	IR	AT3G26744_P1	AT3G26744_P2	gun1_3h	WT_3h
AT3G27210	hypothetical protein;(source:Araport11)	NA	A5	AT3G27210_P1	AT3G27210_s1	gun1_3h	WT_3h
AT3G27330	zinc finger (C3HC4-type RING finger) family protein;(source:Araport11)	NA	ES	AT3G27330_P1	AT3G27330_s1	gun1_3h	WT_3h
AT3G27906	hypothetical protein;(source:Araport11)	NA	A5	AT3G27906_P1	AT3G27906_P2	gun1_3h	WT_3h
AT3G27906	hypothetical protein;(source:Araport11)	NA	IR	AT3G27906_P1	AT3G27906_P2	gun1_3h	WT_3h
AT3G28670	oxidoreductase, zinc-binding dehydrogenase family protein;(source:Araport11)	NA	A3	AT3G28670_P2	AT3G28670_P1	gun1_3h	WT_3h
AT3G28760	3-dehydroquinate synthase;(source:Araport11)	NA	IR	AT3G28760_P1	AT3G28760_ID1	gun1_3h	WT_3h
AT3G28760	3-dehydroquinate synthase;(source:Araport11)	NA	IR	AT3G28760_P1	AT3G28760_ID3	gun1_3h	WT_3h
AT3G43720	Bifunctional inhibitor/lipid-transfer protein/seed storage 2S albumin superfamily protein;(source:Araport11)	LTPG2	A3	AT3G43720_P1	AT3G43720_ID1	gun1_3h	WT_3h
AT3G44200	Encodes AtNek5, a member of the NIMA-related serine/threonine kinases (Neks) that have been linked to cell-cycle regulation in fungi and mammals. Plant Neks might be involved in plant development processes.Interacts physically with plant kinesins ARK1 and ARK2. Mutants show defects in root epidermal cell morphology, trichome branching and other epidermal cell abnormalities suggesting a rol e in e…	ATNEK6,IBO1,NEK6	IR	AT3G44200_P1	AT3G44200_s1	gun1_3h	WT_3h
AT3G45190	SIT4 phosphatase-associated family protein;(source:Araport11)	NA	IR	AT3G45190_P1	AT3G45190_s1	gun1_3h	WT_3h
AT3G45780	Blue-light photoreceptor. Contains a light activated serine-threonine kinase domain and LOV1 and LOV2 repeats. Mutants are defective in blue-light response. Mediates blue light-induced growth enhancements. PHOT1 and PHOT2 mediate blue light-dependent activation of the plasma membrane H+-ATPase in guard cell protoplasts. PHOT1 undergoes blue-light-dependent autophosphorylation. At least eight phos…	JK224,NPH1,PHOT1,RPT1	IR	AT3G45780_P2	AT3G45780_P1	gun1_3h	WT_3h
AT3G47550	RING/FYVE/PHD zinc finger superfamily protein;(source:Araport11)	NA	IR	AT3G47550_P3	AT3G47550.6	gun1_3h	WT_3h
AT3G47630	translocator assembly/maintenance protein;(source:Araport11)	NA	A3	AT3G47630_P4	AT3G47630_ID16	gun1_3h	WT_3h
AT3G47630	translocator assembly/maintenance protein;(source:Araport11)	NA	A5	AT3G47630_P4	AT3G47630_ID16	gun1_3h	WT_3h
AT3G47630	translocator assembly/maintenance protein;(source:Araport11)	NA	IR	AT3G47630_P4	AT3G47630_ID16	gun1_3h	WT_3h
AT3G47630	translocator assembly/maintenance protein;(source:Araport11)	NA	IR	AT3G47630_P6	AT3G47630_ID16	gun1_3h	WT_3h
AT3G47630	translocator assembly/maintenance protein;(source:Araport11)	NA	A3	AT3G47630_P4	AT3G47630_JC2	gun1_3h	WT_3h
AT3G47630	translocator assembly/maintenance protein;(source:Araport11)	NA	A5	AT3G47630_P4	AT3G47630_JC2	gun1_3h	WT_3h
AT3G47630	translocator assembly/maintenance protein;(source:Araport11)	NA	IR	AT3G47630_P4	AT3G47630_JC2	gun1_3h	WT_3h
AT3G47630	translocator assembly/maintenance protein;(source:Araport11)	NA	A3	AT3G47630_P4	AT3G47630_P3	gun1_3h	WT_3h
AT3G47630	translocator assembly/maintenance protein;(source:Araport11)	NA	A5	AT3G47630_P6	AT3G47630_P3	gun1_3h	WT_3h
AT3G47630	translocator assembly/maintenance protein;(source:Araport11)	NA	IR	AT3G47630_P4	AT3G47630_P3	gun1_3h	WT_3h
AT3G47630	translocator assembly/maintenance protein;(source:Araport11)	NA	IR	AT3G47630_P6	AT3G47630_P3	gun1_3h	WT_3h
AT3G48115	other_RNA;(source:Araport11)	NA	IR	AT3G48115.1	AT3G48115_ID1	gun1_3h	WT_3h
AT3G48330	Encodes protein-L-isoaspartate methyltransferase. Important for maintaining viability as the seed ages. Involved in germination.	ATPIMT1,PIMT1	IR	AT3G48330_P1	AT3G48330_ID3	gun1_3h	WT_3h
AT3G48360	Encodes a protein (BT2) that is an essential component of the TAC1-mediated telomerase activation pathway. Acts redundantly with BT3 and BT1 during female gametophyte development and with BT3 during male gametophyte development. BT2 also mediates multiple responses to nutrients, stresses, and hormones.	ATBT2,BT2	IR	AT3G48360_P1	AT3G48360_c1	gun1_3h	WT_3h
AT3G48360	Encodes a protein (BT2) that is an essential component of the TAC1-mediated telomerase activation pathway. Acts redundantly with BT3 and BT1 during female gametophyte development and with BT3 during male gametophyte development. BT2 also mediates multiple responses to nutrients, stresses, and hormones.	ATBT2,BT2	IR	AT3G48360_P1	AT3G48360_P2	gun1_3h	WT_3h
AT3G49920	Encodes a voltage-dependent anion channel (VDAC: AT3G01280/VDAC1, AT5G67500/VDAC2, AT5G15090/VDAC3, AT5G57490/VDAC4, AT5G15090/VDAC5). VDACs are reported to be porin-type, beta-barrel diffusion pores. They are prominently localized in the outer mitochondrial membrane and are involved in metabolite exchange between the organelle and the cytosol.	ATVDAC5,VDAC5	IR	AT3G49920_JS1	AT3G49920_ID3	gun1_3h	WT_3h
AT3G49920	Encodes a voltage-dependent anion channel (VDAC: AT3G01280/VDAC1, AT5G67500/VDAC2, AT5G15090/VDAC3, AT5G57490/VDAC4, AT5G15090/VDAC5). VDACs are reported to be porin-type, beta-barrel diffusion pores. They are prominently localized in the outer mitochondrial membrane and are involved in metabolite exchange between the organelle and the cytosol.	ATVDAC5,VDAC5	IR	AT3G49920_JS1	AT3G49920_P3	gun1_3h	WT_3h
AT3G50370	hypothetical protein;(source:Araport11)	NA	IR	AT3G50370_P2	AT3G50370.1	gun1_3h	WT_3h
AT3G51640	stress response NST1-like protein;(source:Araport11)	NA	ES	AT3G51640.2	AT3G51640_P1	gun1_3h	WT_3h
AT3G51640	stress response NST1-like protein;(source:Araport11)	NA	ES	AT3G51640.2	AT3G51640_P2	gun1_3h	WT_3h
AT3G51640	stress response NST1-like protein;(source:Araport11)	NA	IR	AT3G51640.2	AT3G51640_P2	gun1_3h	WT_3h
AT3G51880	Encodes a protein belonging to the subgroup of HMGB (high mobility group B) proteins that have a distinctive DNA-binding motif, the HMG-box domain. The motif confers non-sequence specific interaction with linear DNA and structure-specific binding to distorted DNA sites. The HMGB proteins are involved in the assembly of nucleoprotein complexes. Can be phosphorylated by CK2alpha. In interphase cell…	AtHMGB1,HMGB1,NFD1	A5	AT3G51880_P1	AT3G51880_P5	gun1_3h	WT_3h
AT3G51880	Encodes a protein belonging to the subgroup of HMGB (high mobility group B) proteins that have a distinctive DNA-binding motif, the HMG-box domain. The motif confers non-sequence specific interaction with linear DNA and structure-specific binding to distorted DNA sites. The HMGB proteins are involved in the assembly of nucleoprotein complexes. Can be phosphorylated by CK2alpha. In interphase cell…	AtHMGB1,HMGB1,NFD1	IR	AT3G51880_P1	AT3G51880_P5	gun1_3h	WT_3h
AT3G52290	Member of IQ67 (CaM binding) domain containing family.	IQD3	A3	AT3G52290_ID1	AT3G52290_c1	gun1_3h	WT_3h
AT3G52290	Member of IQ67 (CaM binding) domain containing family.	IQD3	ES	AT3G52290_ID1	AT3G52290_c1	gun1_3h	WT_3h
AT3G52660	RNA-binding (RRM/RBD/RNP motifs) family protein;(source:Araport11)	NA	A3	AT3G52660_P1	AT3G52660_P2	gun1_3h	WT_3h
AT3G52660	RNA-binding (RRM/RBD/RNP motifs) family protein;(source:Araport11)	NA	IR	AT3G52660_P1	AT3G52660_P2	gun1_3h	WT_3h
AT3G52660	RNA-binding (RRM/RBD/RNP motifs) family protein;(source:Araport11)	NA	A3	AT3G52660_P1	AT3G52660_P3	gun1_3h	WT_3h
AT3G52730	ubiquinol-cytochrome C reductase UQCRX/QCR9-like family protein;(source:Araport11)	NA	A5	AT3G52730_P1	AT3G52730_P2	gun1_3h	WT_3h
AT3G52850	Encodes the Vacuolar Sorting Receptor-1 (VSR-1)/Epidermal Growth Factor Receptor-like protein1(VSR-1/ATELP1). Binds vacuolar targeting signals. Involved in sorting seed storage proteins into vacuoles. The mRNA is cell-to-cell mobile.	ATELP,ATELP1,ATVSR1,BP-80,BP80,BP80-11,BP80B,GFS1,VSR1,VSR11	IR	AT3G52850_P1	AT3G52850_JC1	gun1_3h	WT_3h
AT3G53170	LOW protein: PPR containing protein;(source:Araport11)	NA	A3	AT3G53170.1	AT3G53170_P3	gun1_3h	WT_3h
AT3G53170	LOW protein: PPR containing protein;(source:Araport11)	NA	IR	AT3G53170.1	AT3G53170_P3	gun1_3h	WT_3h
AT3G53170	LOW protein: PPR containing protein;(source:Araport11)	NA	IR	AT3G53170_P2	AT3G53170_P3	gun1_3h	WT_3h
AT3G53680	Acyl-CoA N-acyltransferase with RING/FYVE/PHD-type zinc finger domain-containing protein;(source:Araport11)	NA	A3	AT3G53680_P1	AT3G53680_JS3	gun1_3h	WT_3h
AT3G53750	Member of the Actin gene family. Expressed in mature pollen.	ACT3	ES	AT3G53750_P1	AT3G53750_s1	gun1_3h	WT_3h
AT3G53750	Member of the Actin gene family. Expressed in mature pollen.	ACT3	IR	AT3G53750_P1	AT3G53750_s1	gun1_3h	WT_3h
AT3G53830	Regulator of chromosome condensation (RCC1) family protein;(source:Araport11)	NA	A3	AT3G53830_s6	AT3G53830_JS5	gun1_3h	WT_3h
AT3G53830	Regulator of chromosome condensation (RCC1) family protein;(source:Araport11)	NA	IR	AT3G53830_s6	AT3G53830_JS5	gun1_3h	WT_3h
AT3G53830	Regulator of chromosome condensation (RCC1) family protein;(source:Araport11)	NA	A3	AT3G53830_s6	AT3G53830_JS9	gun1_3h	WT_3h
AT3G53830	Regulator of chromosome condensation (RCC1) family protein;(source:Araport11)	NA	A3	AT3G53830_JS6	AT3G53830_JS9	gun1_3h	WT_3h
AT3G53830	Regulator of chromosome condensation (RCC1) family protein;(source:Araport11)	NA	A3	AT3G53830_P3	AT3G53830_JS9	gun1_3h	WT_3h
AT3G53830	Regulator of chromosome condensation (RCC1) family protein;(source:Araport11)	NA	A3	AT3G53830_P4	AT3G53830_JS9	gun1_3h	WT_3h
AT3G53830	Regulator of chromosome condensation (RCC1) family protein;(source:Araport11)	NA	ES	AT3G53830_P3	AT3G53830_JS9	gun1_3h	WT_3h
AT3G53830	Regulator of chromosome condensation (RCC1) family protein;(source:Araport11)	NA	ES	AT3G53830_P4	AT3G53830_JS9	gun1_3h	WT_3h
AT3G53830	Regulator of chromosome condensation (RCC1) family protein;(source:Araport11)	NA	IR	AT3G53830_s6	AT3G53830_JS9	gun1_3h	WT_3h
AT3G53830	Regulator of chromosome condensation (RCC1) family protein;(source:Araport11)	NA	IR	AT3G53830_P3	AT3G53830_JS9	gun1_3h	WT_3h
AT3G54050	Encodes a chloroplastic fructose 1,6-bisphosphate phosphatase. also known as HCEF1 (High Cyclic Electron Flow 1). hcef1 mutants have constitutively elevated electron flow (CEFI) and plants with antisense suppression of this enzyme have higher levels of net leaf photosynthesis and increased sucrose biosynthesis. The mRNA is cell-to-cell mobile.	cfbp1,HCEF1	A5	AT3G54050_P1	AT3G54050_JC2	gun1_3h	WT_3h
AT3G54050	Encodes a chloroplastic fructose 1,6-bisphosphate phosphatase. also known as HCEF1 (High Cyclic Electron Flow 1). hcef1 mutants have constitutively elevated electron flow (CEFI) and plants with antisense suppression of this enzyme have higher levels of net leaf photosynthesis and increased sucrose biosynthesis. The mRNA is cell-to-cell mobile.	cfbp1,HCEF1	IR	AT3G54050_P1	AT3G54050_JC2	gun1_3h	WT_3h
AT3G54600	Class I glutamine amidotransferase-like superfamily protein;(source:Araport11)	DJ-1f,DJ1F	IR	AT3G54600_s1	AT3G54600_P1	gun1_3h	WT_3h
AT3G54740	zein-binding protein (Protein of unknown function, DUF593);(source:Araport11)	NA	IR	AT3G54740_P5	AT3G54740_P6	gun1_3h	WT_3h
AT3G54750	downstream neighbor of Son;(source:Araport11)	NA	A3	AT3G54750_P2	AT3G54750_ID8	gun1_3h	WT_3h
AT3G54750	downstream neighbor of Son;(source:Araport11)	NA	A3	AT3G54750_P2	AT3G54750_P1	gun1_3h	WT_3h
AT3G54750	downstream neighbor of Son;(source:Araport11)	NA	A3	AT3G54750_P2	AT3G54750_P5	gun1_3h	WT_3h
AT3G54750	downstream neighbor of Son;(source:Araport11)	NA	A3	AT3G54750_P3	AT3G54750_P5	gun1_3h	WT_3h
AT3G54860	Homologous to yeast VPS33. Forms a complex with VCL1 and AtVPS11. Involved in vacuolar biogenesis.	ATVPS33,VPS33	ES	AT3G54860_P1	AT3G54860.2	gun1_3h	WT_3h
AT3G54860	Homologous to yeast VPS33. Forms a complex with VCL1 and AtVPS11. Involved in vacuolar biogenesis.	ATVPS33,VPS33	ES	AT3G54860_P1	AT3G54860_JS3	gun1_3h	WT_3h
AT3G54970	D-aminoacid aminotransferase-like PLP-dependent enzymes superfamily protein;(source:Araport11)	NA	A3	AT3G54970_P1	AT3G54970_ID2	gun1_3h	WT_3h
AT3G54970	D-aminoacid aminotransferase-like PLP-dependent enzymes superfamily protein;(source:Araport11)	NA	IR	AT3G54970_P1	AT3G54970_P6	gun1_3h	WT_3h
AT3G55470	Calcium-dependent lipid-binding (CaLB domain) family protein;(source:Araport11)	NA	A3	AT3G55470.1	AT3G55470_P2	gun1_3h	WT_3h
AT3G55510	Encodes a regulator of floral determinacy in that interacts with both nucleolar and nucleoplasmic proteins.	RBL	IR	AT3G55510_P1	AT3G55510_P2	gun1_3h	WT_3h
AT3G55510	Encodes a regulator of floral determinacy in that interacts with both nucleolar and nucleoplasmic proteins.	RBL	A3	AT3G55510_P1	AT3G55510_s1	gun1_3h	WT_3h
AT3G55690	hypothetical protein;(source:Araport11)	NA	A3	AT3G55690_ID2	AT3G55690_P1	gun1_3h	WT_3h
AT3G55850	Encodes a product that might regulate nucleo-cytoplasmic trafficking of an intermediate(s) involved in phyA signal transduction. Differs from isoform 2 only in the first few N-terminal amino acids.	LAF3,LAF3_ISF1,LAF3_ISF2	A3	AT3G55850_P6	AT3G55850_P4	gun1_3h	WT_3h
AT3G55850	Encodes a product that might regulate nucleo-cytoplasmic trafficking of an intermediate(s) involved in phyA signal transduction. Differs from isoform 2 only in the first few N-terminal amino acids.	LAF3,LAF3_ISF1,LAF3_ISF2	A5	AT3G55850_P6	AT3G55850_P4	gun1_3h	WT_3h
AT3G55850	Encodes a product that might regulate nucleo-cytoplasmic trafficking of an intermediate(s) involved in phyA signal transduction. Differs from isoform 2 only in the first few N-terminal amino acids.	LAF3,LAF3_ISF1,LAF3_ISF2	IR	AT3G55850_P6	AT3G55850_P4	gun1_3h	WT_3h
AT3G56440	yeast autophagy 18 D-like protein;(source:Araport11)	ATATG18D,ATG18D	IR	AT3G56440_P1	AT3G56440_P2	gun1_3h	WT_3h
AT3G56510	RNA-binding (RRM/RBD/RNP motifs) family protein;(source:Araport11)	NA	ES	AT3G56510.2	AT3G56510_c1	gun1_3h	WT_3h
AT3G56510	RNA-binding (RRM/RBD/RNP motifs) family protein;(source:Araport11)	NA	IR	AT3G56510.2	AT3G56510_c1	gun1_3h	WT_3h
AT3G56510	RNA-binding (RRM/RBD/RNP motifs) family protein;(source:Araport11)	NA	A3	AT3G56510.2	AT3G56510_P4	gun1_3h	WT_3h
AT3G56510	RNA-binding (RRM/RBD/RNP motifs) family protein;(source:Araport11)	NA	ES	AT3G56510.2	AT3G56510_P4	gun1_3h	WT_3h
AT3G56510	RNA-binding (RRM/RBD/RNP motifs) family protein;(source:Araport11)	NA	IR	AT3G56510.2	AT3G56510_P4	gun1_3h	WT_3h
AT3G58790	Encodes a protein with putative galacturonosyltransferase activity.	GAUT15	IR	AT3G58790.1	AT3G58790_ID4	gun1_3h	WT_3h
AT3G58790	Encodes a protein with putative galacturonosyltransferase activity.	GAUT15	IR	AT3G58790.1	AT3G58790_JC3	gun1_3h	WT_3h
AT3G59390	glycosyltransferase family protein;(source:Araport11)	NA	IR	AT3G59390_ID17	AT3G59390_ID13	gun1_3h	WT_3h
AT3G59990	Encodes a MAP2 like methionine aminopeptidase	MAP2B	IR	AT3G59990_P2	AT3G59990.1	gun1_3h	WT_3h
AT3G59990	Encodes a MAP2 like methionine aminopeptidase	MAP2B	A5	AT3G59990_P2	AT3G59990.3	gun1_3h	WT_3h
AT3G59990	Encodes a MAP2 like methionine aminopeptidase	MAP2B	IR	AT3G59990_P2	AT3G59990.3	gun1_3h	WT_3h
AT3G61080	Protein kinase superfamily protein;(source:Araport11)	NA	A3	AT3G61080_ID3	AT3G61080.1	gun1_3h	WT_3h
AT3G61080	Protein kinase superfamily protein;(source:Araport11)	NA	A3	AT3G61080_ID3	AT3G61080_P2	gun1_3h	WT_3h
AT3G61080	Protein kinase superfamily protein;(source:Araport11)	NA	IR	AT3G61080_ID3	AT3G61080_P2	gun1_3h	WT_3h
AT3G61570	This gene is predicted to encode a protein that functions as a Golgi apparatus structural component known as a golgin in mammals and yeast. A fluorescently-tagged version of GC3 co-localizes with Golgi markers, and this localization appears to be replicated using the C-terminal (161 aa) portion of the protein.	GC3,GDAP1	A3	AT3G61570_ID2	AT3G61570_P1	gun1_3h	WT_3h
AT3G61740	Encodes SET domain containing protein that acts redundantly with ATX4/5 to regulate histone H3-K4 methylation. Involved in bolting/flowering time together with ATX1 and ATX4.	ATX3,SDG14	A3	AT3G61740_P2	AT3G61740_s1	gun1_3h	WT_3h
AT3G62120	Encodes a cytosolic prolyl-tRNA synthetase.	AtProRS-Cyt,ProRS-Cyt	A5	AT3G62120.1	AT3G62120_ID7	gun1_3h	WT_3h
AT3G62120	Encodes a cytosolic prolyl-tRNA synthetase.	AtProRS-Cyt,ProRS-Cyt	IR	AT3G62120.1	AT3G62120_P3	gun1_3h	WT_3h
AT3G62880	Homologous to pea OEP16 and barley pPORA (OEP16), a member of Arabidopsis OEP16 family.	ATOEP16-4	IR	AT3G62880_P1	AT3G62880_P2	gun1_3h	WT_3h
AT4G00900	Type IIA (SERCA-type) Ca2+ ATPase, catalyzes the efflux of calcium from the cytoplasm.	ATECA2,ECA2	IR	AT4G00900_P2	AT4G00900_P1	gun1_3h	WT_3h
AT4G01250	AtWRKY22 is a member of WRKY Transcription Factor; Group II-e. It is involved in regulation of dark induced leaf senescence.	AtWRKY22,WRKY22	IR	AT4G01250_ID2	AT4G01250.1	gun1_3h	WT_3h
AT4G01880	methyltransferase;(source:Araport11)	AtTRM13,TRM13	A5	AT4G01880_ID21	AT4G01880_P1	gun1_3h	WT_3h
AT4G02890	Polyubiquitin gene containing 4 ubiquitin repeats.	UBQ14	A5	AT4G02890_P4	AT4G02890.1	gun1_3h	WT_3h
AT4G02890	Polyubiquitin gene containing 4 ubiquitin repeats.	UBQ14	IR	AT4G02890_P4	AT4G02890.1	gun1_3h	WT_3h
AT4G02890	Polyubiquitin gene containing 4 ubiquitin repeats.	UBQ14	A3	AT4G02890_P4	AT4G02890_c1	gun1_3h	WT_3h
AT4G02890	Polyubiquitin gene containing 4 ubiquitin repeats.	UBQ14	IR	AT4G02890_P4	AT4G02890_c1	gun1_3h	WT_3h
AT4G03030	Galactose oxidase/kelch repeat superfamily protein;(source:Araport11)	NA	A5	AT4G03030_P1	AT4G03030_ID1	gun1_3h	WT_3h
AT4G03030	Galactose oxidase/kelch repeat superfamily protein;(source:Araport11)	NA	IR	AT4G03030_P1	AT4G03030_ID1	gun1_3h	WT_3h
AT4G03230	G-type lectin S-receptor-like Serine/Threonine-kinase;(source:Araport11)	NA	A3	AT4G03230_P4	AT4G03230_P5	gun1_3h	WT_3h
AT4G03230	G-type lectin S-receptor-like Serine/Threonine-kinase;(source:Araport11)	NA	IR	AT4G03230_P4	AT4G03230_P5	gun1_3h	WT_3h
AT4G04750	Putative mitochondrial F1F0-ATPase.	NA	IR	AT4G04750_P2	AT4G04750_ID47	gun1_3h	WT_3h
AT4G04750	Putative mitochondrial F1F0-ATPase.	NA	IR	AT4G04750_P3	AT4G04750_ID47	gun1_3h	WT_3h
AT4G05040	ankyrin repeat family protein;(source:Araport11)	NA	ES	AT4G05040_P2	AT4G05040_P1	gun1_3h	WT_3h
AT4G05040	ankyrin repeat family protein;(source:Araport11)	NA	IR	AT4G05040_P2	AT4G05040_P1	gun1_3h	WT_3h
AT4G05050	polyubiquitin gene, belongs to a subtype group with UBQ10 and UBQ14. Various ecotypes of Arabidopsis have different numbers of ubiquitin repeats within this gene.	UBQ11	IR	AT4G05050_P1	AT4G05050_s1	gun1_3h	WT_3h
AT4G05170	basic helix-loop-helix (bHLH) DNA-binding superfamily protein;(source:Araport11)	NA	IR	AT4G05170_P4	AT4G05170_P5	gun1_3h	WT_3h
AT4G05320	One of five polyubiquitin genes in A. thaliana. These genes encode the highly conserved 76-amino acid protein ubiquitin that is covalently attached to substrate proteins targeting most for degradation. Polyubiquitin genes are characterized by the presence of tandem repeats of the 228 bp that encode a ubiquitin monomer. Induced by salicylic acid. Independent of NPR1 for their induction by salicyli…	UBI10,UBQ10	IR	AT4G05320_P2	AT4G05320_P7	gun1_3h	WT_3h
AT4G06598	basic-leucine zipper (bZIP) transcription factor family protein;(source:Araport11)	NA	IR	AT4G06598_P1	AT4G06598_P3	gun1_3h	WT_3h
AT4G06634	Encodes an ABA responsive C2H2-type zinc finger transcription factor with both transcriptional repression and activation domains, that binds a G-rich, 11-bp DNA-binding motif. YY1 binds to the promoter of ABR1 and disruption represses ABA- and salt-induced ABR1 expression.	AtYY1,YY1	IR	AT4G06634.2	AT4G06634.1	gun1_3h	WT_3h
AT4G06634	Encodes an ABA responsive C2H2-type zinc finger transcription factor with both transcriptional repression and activation domains, that binds a G-rich, 11-bp DNA-binding motif. YY1 binds to the promoter of ABR1 and disruption represses ABA- and salt-induced ABR1 expression.	AtYY1,YY1	A3	AT4G06634.2	AT4G06634_s1	gun1_3h	WT_3h
AT4G06634	Encodes an ABA responsive C2H2-type zinc finger transcription factor with both transcriptional repression and activation domains, that binds a G-rich, 11-bp DNA-binding motif. YY1 binds to the promoter of ABR1 and disruption represses ABA- and salt-induced ABR1 expression.	AtYY1,YY1	IR	AT4G06634.2	AT4G06634_s1	gun1_3h	WT_3h
AT4G06634	Encodes an ABA responsive C2H2-type zinc finger transcription factor with both transcriptional repression and activation domains, that binds a G-rich, 11-bp DNA-binding motif. YY1 binds to the promoter of ABR1 and disruption represses ABA- and salt-induced ABR1 expression.	AtYY1,YY1	A3	AT4G06634.2	AT4G06634_s2	gun1_3h	WT_3h
AT4G06634	Encodes an ABA responsive C2H2-type zinc finger transcription factor with both transcriptional repression and activation domains, that binds a G-rich, 11-bp DNA-binding motif. YY1 binds to the promoter of ABR1 and disruption represses ABA- and salt-induced ABR1 expression.	AtYY1,YY1	IR	AT4G06634.2	AT4G06634_s2	gun1_3h	WT_3h
AT4G08980	Encodes an F-box gene that is a novel negative regulator of AGO1 protein levels and may play a role in ABA signalling and/or response. It is a F-box subunit of the SCF E3 ubiquitin ligase complex that mediates the degradation of 14-3-3 proteins.	FBW2,SKIP18	A5	AT4G08980_P1	AT4G08980_P2	gun1_3h	WT_3h
AT4G08980	Encodes an F-box gene that is a novel negative regulator of AGO1 protein levels and may play a role in ABA signalling and/or response. It is a F-box subunit of the SCF E3 ubiquitin ligase complex that mediates the degradation of 14-3-3 proteins.	FBW2,SKIP18	IR	AT4G08980_P1	AT4G08980_P2	gun1_3h	WT_3h
AT4G09020	Encodes an isoamylase-like protein. Mutant studies show that the gene is strongly involved in starch breakdown. A GUS-protein fusion product was shown to localize to the surface of chloroplastic structures reminiscent of starch granules. In the mutants, the chloroplastic &	ATISA3,ISA3	IR	AT4G09020_s3	AT4G09020_s1	gun1_3h	WT_3h
AT4G09432	Natural antisense transcript overlaps with AT4G09430;(source:Araport11)	NA	IR	AT4G09432.1	AT4G09432_JS1	gun1_3h	WT_3h
AT4G10070	KH domain-containing protein;(source:Araport11)	NA	A3	AT4G10070_c3	AT4G10070_c1	gun1_3h	WT_3h
AT4G10330	glycine-rich protein;(source:Araport11)	NA	A3	AT4G10330_JS2	AT4G10330_P1	gun1_3h	WT_3h
AT4G10590	encodes a member of the ubiquitin-specific protease family, UBP10	UBP10	IR	AT4G10590_P2	AT4G10590_ID13	gun1_3h	WT_3h
AT4G11110	Encodes a member of the SPA (suppressor of phyA-105) protein family (SPA1-SPA4). SPA proteins contain an N-terminal serine/threonine kinase-like motif followed by a coiled-coil structure and a C-terminal WD-repeat domain. SPA proteins function redundantly in suppressing photomorphogenesis in dark- and light-grown seedlings. SPA2 primarily regulates seedling development in darkness and has little …	SPA2	IR	AT4G11110.1	AT4G11110_JS3	gun1_3h	WT_3h
AT4G11160	Translation initiation factor 2, small GTP-binding protein;(source:Araport11)	NA	IR	AT4G11160_P2	AT4G11160_P3	gun1_3h	WT_3h
AT4G11740	Isolated as a suppressor of a dominant mutant in the Ara4 gene that was expressed in yeast ypt1 mutant strains. A novel protein with a small region of similarity to coil-coiled domain of yeast VSP27 protein.	SAY1	A3	AT4G11740_P1	AT4G11740_P2	gun1_3h	WT_3h
AT4G11740	Isolated as a suppressor of a dominant mutant in the Ara4 gene that was expressed in yeast ypt1 mutant strains. A novel protein with a small region of similarity to coil-coiled domain of yeast VSP27 protein.	SAY1	IR	AT4G11740_JS1	AT4G11740_P2	gun1_3h	WT_3h
AT4G12020	Encodes a member of the A1 subgroup of the MEKK (MAPK/ERK kinase kinase) family. MEKK is another name for Mitogen-Activated Protein Kinase Kinase Kinase (MAPKKK or MAP3K). This subgroup has four members: At4g08500 (MEKK1, also known as ARAKIN, MAP3Kb1, MAPKKK8), At4g08480 (MEKK2, also known as MAP3Kb4, MAPKKK9), At4g08470 (MEKK3, also known as MAP3Kb3, MAPKKK10) and At4g12020 (MEKK4, also known a…	ATWRKY19,MAPKKK11,MEKK4,WRKY19	A5	AT4G12020_P4	AT4G12020_c1	gun1_3h	WT_3h
AT4G12020	Encodes a member of the A1 subgroup of the MEKK (MAPK/ERK kinase kinase) family. MEKK is another name for Mitogen-Activated Protein Kinase Kinase Kinase (MAPKKK or MAP3K). This subgroup has four members: At4g08500 (MEKK1, also known as ARAKIN, MAP3Kb1, MAPKKK8), At4g08480 (MEKK2, also known as MAP3Kb4, MAPKKK9), At4g08470 (MEKK3, also known as MAP3Kb3, MAPKKK10) and At4g12020 (MEKK4, also known a…	ATWRKY19,MAPKKK11,MEKK4,WRKY19	ES	AT4G12020_P4	AT4G12020_c1	gun1_3h	WT_3h
AT4G12020	Encodes a member of the A1 subgroup of the MEKK (MAPK/ERK kinase kinase) family. MEKK is another name for Mitogen-Activated Protein Kinase Kinase Kinase (MAPKKK or MAP3K). This subgroup has four members: At4g08500 (MEKK1, also known as ARAKIN, MAP3Kb1, MAPKKK8), At4g08480 (MEKK2, also known as MAP3Kb4, MAPKKK9), At4g08470 (MEKK3, also known as MAP3Kb3, MAPKKK10) and At4g12020 (MEKK4, also known a…	ATWRKY19,MAPKKK11,MEKK4,WRKY19	IR	AT4G12020_P4	AT4G12020_c1	gun1_3h	WT_3h
AT4G12020	Encodes a member of the A1 subgroup of the MEKK (MAPK/ERK kinase kinase) family. MEKK is another name for Mitogen-Activated Protein Kinase Kinase Kinase (MAPKKK or MAP3K). This subgroup has four members: At4g08500 (MEKK1, also known as ARAKIN, MAP3Kb1, MAPKKK8), At4g08480 (MEKK2, also known as MAP3Kb4, MAPKKK9), At4g08470 (MEKK3, also known as MAP3Kb3, MAPKKK10) and At4g12020 (MEKK4, also known a…	ATWRKY19,MAPKKK11,MEKK4,WRKY19	IR	AT4G12020_P4	AT4G12020_P5	gun1_3h	WT_3h
AT4G12120	member of KEULE Gene Family	ATSEC1B,SEC1B	A3	AT4G12120_c1	AT4G12120_P1	gun1_3h	WT_3h
AT4G12640	Encodes a member of the Split ends (Spen) protein family that is characterized by an N-terminal domain, with one or more RNA recognition motifs and a SPOC domain. Knockout and overexpression mutants show no apparent changes in growth, development and flowering time under standard growth conditions.	AtSPEN2	A3	AT4G12640_P2	AT4G12640_ID2	gun1_3h	WT_3h
AT4G12640	Encodes a member of the Split ends (Spen) protein family that is characterized by an N-terminal domain, with one or more RNA recognition motifs and a SPOC domain. Knockout and overexpression mutants show no apparent changes in growth, development and flowering time under standard growth conditions.	AtSPEN2	IR	AT4G12640_P1	AT4G12640_ID2	gun1_3h	WT_3h
AT4G13100	RING/U-box superfamily protein;(source:Araport11)	NA	A3	AT4G13100_P2	AT4G13100_s1	gun1_3h	WT_3h
AT4G13100	RING/U-box superfamily protein;(source:Araport11)	NA	A5	AT4G13100_P2	AT4G13100_s1	gun1_3h	WT_3h
AT4G13200	Plastoglobular protein which is involved in chloroplast function and thylakoid formation.	NA	IR	AT4G13200_ID1	AT4G13200_P1	gun1_3h	WT_3h
AT4G13940	Encodes a S-adenosyl-L-homocysteine hydrolase required for DNA methylation-dependent gene silencing. The mRNA is cell-to-cell mobile.	ATSAHH1,EMB1395,HOG1,MEE58,SAH1,SAHH1	A3	AT4G13940_P1	AT4G13940_ID3	gun1_3h	WT_3h
AT4G13940	Encodes a S-adenosyl-L-homocysteine hydrolase required for DNA methylation-dependent gene silencing. The mRNA is cell-to-cell mobile.	ATSAHH1,EMB1395,HOG1,MEE58,SAH1,SAHH1	A5	AT4G13940_P1	AT4G13940_ID3	gun1_3h	WT_3h
AT4G13940	Encodes a S-adenosyl-L-homocysteine hydrolase required for DNA methylation-dependent gene silencing. The mRNA is cell-to-cell mobile.	ATSAHH1,EMB1395,HOG1,MEE58,SAH1,SAHH1	A3	AT4G13940_P1	AT4G13940_ID5	gun1_3h	WT_3h
AT4G13940	Encodes a S-adenosyl-L-homocysteine hydrolase required for DNA methylation-dependent gene silencing. The mRNA is cell-to-cell mobile.	ATSAHH1,EMB1395,HOG1,MEE58,SAH1,SAHH1	A5	AT4G13940_P1	AT4G13940_ID5	gun1_3h	WT_3h
AT4G14147	actin-related protein 2/3 complex 34kDa subunit family / arp2/3 complex 34kDa subunit family	ARPC4	A3	AT4G14147_ID5	AT4G14147_ID1	gun1_3h	WT_3h
AT4G14147	actin-related protein 2/3 complex 34kDa subunit family / arp2/3 complex 34kDa subunit family	ARPC4	IR	AT4G14147_ID5	AT4G14147_ID1	gun1_3h	WT_3h
AT4G14147	actin-related protein 2/3 complex 34kDa subunit family / arp2/3 complex 34kDa subunit family	ARPC4	IR	AT4G14147_c4	AT4G14147_ID1	gun1_3h	WT_3h
AT4G15230	pleiotropic drug resistance 2;(source:Araport11)	ABCG30,ATPDR2,PDR2	IR	AT4G15230.1	AT4G15230_c1	gun1_3h	WT_3h
AT4G15570	Similar to yeast Sen1 (splicing endonuclease 1)helicase protein. Involved in female gametophyte development. The mRNA is cell-to-cell mobile.	MAA3	IR	AT4G15570_P2	AT4G15570_P1	gun1_3h	WT_3h
AT4G15940	Fumarylacetoacetate hydrolase homolog; involved in seed redox regulation and to affect seed quality traits such as seed thermo-dormancy and longevity.	NA	IR	AT4G15940_P1	AT4G15940_s1	gun1_3h	WT_3h
AT4G16840	transmembrane protein;(source:Araport11)	NA	A3	AT4G16840_P1	AT4G16840_ID1	gun1_3h	WT_3h
AT4G16840	transmembrane protein;(source:Araport11)	NA	A3	AT4G16840_ID3	AT4G16840_ID1	gun1_3h	WT_3h
AT4G16840	transmembrane protein;(source:Araport11)	NA	IR	AT4G16840_ID3	AT4G16840_ID1	gun1_3h	WT_3h
AT4G16890	Encodes a Toll Interleukin1 receptor-nucleotide binding-Leu- rich repeat-type resistance gene (TIR-NB-LRR-type) involved in the salicylic acid-dependent defense response pathway. Mutant plants constitutively express pathogenesis-related (PR) genes and are pathogen resistant. Resistance signaling in snc1 requires EDS1, MOS3 and PAD4.	BAL,SNC1	IR	AT4G16890_P1	AT4G16890_P3	gun1_3h	WT_3h
AT4G18710	Encodes BIN2, a member of the ATSK (shaggy-like kinase) family. BIN2 functions in the cross-talk between auxin and brassinosteroid signaling pathways. BIN2 regulates root epidermal cell fate specification by phosphorylating EGL3 and TTG1. BIN2-mediated phosphorylation appears to promote BZR1 export from the nucleus. KIB1 interacts with BIN2 blocking its interaction with substrates and promotes BI…	ATSK21,BIN2,DWF12,SK21,UCU1	A3	AT4G18710.2	AT4G18710_P2	gun1_3h	WT_3h
AT4G18710	Encodes BIN2, a member of the ATSK (shaggy-like kinase) family. BIN2 functions in the cross-talk between auxin and brassinosteroid signaling pathways. BIN2 regulates root epidermal cell fate specification by phosphorylating EGL3 and TTG1. BIN2-mediated phosphorylation appears to promote BZR1 export from the nucleus. KIB1 interacts with BIN2 blocking its interaction with substrates and promotes BI…	ATSK21,BIN2,DWF12,SK21,UCU1	A5	AT4G18710.2	AT4G18710_P2	gun1_3h	WT_3h
AT4G19160	transglutaminase family protein;(source:Araport11)	NA	A5	AT4G19160_P2	AT4G19160_P1	gun1_3h	WT_3h
AT4G19420	Pectinacetylesterase family protein;(source:Araport11)	PAE8	IR	AT4G19420_P1	AT4G19420_JS1	gun1_3h	WT_3h
AT4G19985	Acyl-CoA N-acyltransferases (NAT) superfamily protein;(source:Araport11)	NA	A3	AT4G19985_P7	AT4G19985.1	gun1_3h	WT_3h
AT4G20310	Encodes a Golgi-localized protease that can cleave the transcription factors bZIP17 and bZIP28 that are translocated from the ER through the Golgi so that the transcription factors can be released to translocate into the nucleus.	S2P	A3	AT4G20310_P2	AT4G20310_ID12	gun1_3h	WT_3h
AT4G20310	Encodes a Golgi-localized protease that can cleave the transcription factors bZIP17 and bZIP28 that are translocated from the ER through the Golgi so that the transcription factors can be released to translocate into the nucleus.	S2P	IR	AT4G20310_P2	AT4G20310_ID12	gun1_3h	WT_3h
AT4G20310	Encodes a Golgi-localized protease that can cleave the transcription factors bZIP17 and bZIP28 that are translocated from the ER through the Golgi so that the transcription factors can be released to translocate into the nucleus.	S2P	IR	AT4G20310_P2	AT4G20310_ID6	gun1_3h	WT_3h
AT4G21720	defensin-like protein;(source:Araport11)	NA	A3	AT4G21720_P1	AT4G21720_P3	gun1_3h	WT_3h
AT4G21720	defensin-like protein;(source:Araport11)	NA	IR	AT4G21720_P1	AT4G21720_P3	gun1_3h	WT_3h
AT4G24900	Encodes a nuclear C2H2 domain-containing protein involved in embryo and endosperm development. Involved in brassinosteroid (BR)-mediated plant growth and catalyses the synthesis of S-allantoin, together with B1L participates in modulating plant growth and cold tolerance.	TTL	IR	AT4G24900_ID5	AT4G24900_ID10	gun1_3h	WT_3h
AT4G25030	Plastid localized protein of unknown function. Mutants are more susceptible to P. syringae and produce less callose upon infection.	AtNHR2B	IR	AT4G25030_P1	AT4G25030_JS1	gun1_3h	WT_3h
AT4G25315	Expressed protein;(source:Araport11)	NA	ES	AT4G25315.2	AT4G25315.1	gun1_3h	WT_3h
AT4G25500	Encodes an arginine/serine-rich splicing factor. The transcript is alternatively spliced and is differentially expressed in different tissues (flowers, roots, stems, and leaves) examined. Barta et al (2010) have proposed a nomenclature for Serine/Arginine-Rich Protein Splicing Factors (SR proteins): Plant Cell. 2010, 22:2926. RS40 binds to HYL1 and co-localizes to the nuclear dicing body. Along w…	At-RS40,AT-SRP40,ATRSP35,ATRSP40,RS40,RSP35	ES	AT4G25500_ID7	AT4G25500_CR1	gun1_3h	WT_3h
AT4G25720	This locus encodes a protein with similarity to gamma-glutamylcyclotransferase that may be involved in catalyzing the formation of pyroglutate residue on proteins that have been post-translationally processed to reveal a glutamine at their N-terminus. Enzymatic assays to test the function of this protein were performed using a truncated form of the protein lacking a signal peptide that is most si…	ATQC,QC,QCT	A5	AT4G25720_P1	AT4G25720.3	gun1_3h	WT_3h
AT4G25910	Encodes a protein containing the NFU domain that may be involved in iron-sulfur cluster assembly. Part of a five member gene family, more closely related to NFU1 and 2 than to NFU4 and 5. Targeted to the chloroplast. The mRNA is cell-to-cell mobile.	ATCNFU3,NFU3	IR	AT4G25910_P1	AT4G25910_ID1	gun1_3h	WT_3h
AT4G25910	Encodes a protein containing the NFU domain that may be involved in iron-sulfur cluster assembly. Part of a five member gene family, more closely related to NFU1 and 2 than to NFU4 and 5. Targeted to the chloroplast. The mRNA is cell-to-cell mobile.	ATCNFU3,NFU3	IR	AT4G25910_P1	AT4G25910_ID3	gun1_3h	WT_3h
AT4G26180	Encodes a mitochondrial CoA transporter.	CoAc2	A3	AT4G26180_s2	AT4G26180_c1	gun1_3h	WT_3h
AT4G26180	Encodes a mitochondrial CoA transporter.	CoAc2	A3	AT4G26180_s2	AT4G26180_P1	gun1_3h	WT_3h
AT4G26180	Encodes a mitochondrial CoA transporter.	CoAc2	A3	AT4G26180_s2	AT4G26180_s1	gun1_3h	WT_3h
AT4G26600	S-adenosyl-L-methionine-dependent methyltransferases superfamily protein;(source:Araport11)	AtTRM4d,NOP2B,TRM4d	IR	AT4G26600_P3	AT4G26600_P1	gun1_3h	WT_3h
AT4G27630	Encodes a GPCR-type G protein receptor with nine predicted transmembrane domains. The protein binds abscisic acid (ABA) and is predicted to function as an ABA receptor. It has GTP-binding and GTPase activity and binds to ABA more effectively in the presence of GDP. GTG2 binds to GPA1, the alpha subunit of the heterotrimeric G protein. GPA1 (in its GTP-bound state) affects the GTP binding and GTPa…	GTG2	IR	AT4G27630_JS5	AT4G27630_P2	gun1_3h	WT_3h
AT4G27630	Encodes a GPCR-type G protein receptor with nine predicted transmembrane domains. The protein binds abscisic acid (ABA) and is predicted to function as an ABA receptor. It has GTP-binding and GTPase activity and binds to ABA more effectively in the presence of GDP. GTG2 binds to GPA1, the alpha subunit of the heterotrimeric G protein. GPA1 (in its GTP-bound state) affects the GTP binding and GTPa…	GTG2	IR	AT4G27630_P1	AT4G27630_P2	gun1_3h	WT_3h
AT4G27650	Encodes Arabidopsis homolog of Drosophila pelota protein. Functions in RNA the non-stop decay (NSD) and no-go decay (NGD) quality control systems that act during translation.	PEL1	A5	AT4G27650_s2	AT4G27650_P1	gun1_3h	WT_3h
AT4G27820	beta glucosidase 9;(source:Araport11)	BGLU9	ES	AT4G27820_P3	AT4G27820_P2	gun1_3h	WT_3h
AT4G27820	beta glucosidase 9;(source:Araport11)	BGLU9	IR	AT4G27820_P3	AT4G27820_P2	gun1_3h	WT_3h
AT4G28360	Ribosomal protein L22p/L17e family protein;(source:Araport11)	NA	A3	AT4G28360_P1	AT4G28360_ID1	gun1_3h	WT_3h
AT4G28360	Ribosomal protein L22p/L17e family protein;(source:Araport11)	NA	A5	AT4G28360_P1	AT4G28360_ID1	gun1_3h	WT_3h
AT4G28360	Ribosomal protein L22p/L17e family protein;(source:Araport11)	NA	ES	AT4G28360_P1	AT4G28360_ID1	gun1_3h	WT_3h
AT4G29540	Encodes a UDP-N-acetylglucosamine acyltransferase.	AtLpxA,LpxA	A3	AT4G29540_ID2	AT4G29540_P2	gun1_3h	WT_3h
AT4G29540	Encodes a UDP-N-acetylglucosamine acyltransferase.	AtLpxA,LpxA	IR	AT4G29540_ID2	AT4G29540_P2	gun1_3h	WT_3h
AT4G29540	Encodes a UDP-N-acetylglucosamine acyltransferase.	AtLpxA,LpxA	A3	AT4G29540_ID1	AT4G29540_P3	gun1_3h	WT_3h
AT4G29540	Encodes a UDP-N-acetylglucosamine acyltransferase.	AtLpxA,LpxA	A3	AT4G29540_ID2	AT4G29540_P3	gun1_3h	WT_3h
AT4G29540	Encodes a UDP-N-acetylglucosamine acyltransferase.	AtLpxA,LpxA	IR	AT4G29540_ID1	AT4G29540_P3	gun1_3h	WT_3h
AT4G30150	Urb2/Npa2 family protein;(source:Araport11)	NA	IR	AT4G30150_P1	AT4G30150_P2	gun1_3h	WT_3h
AT4G31000	Calmodulin-binding protein;(source:Araport11)	NA	IR	AT4G31000_ID3	AT4G31000_ID5	gun1_3h	WT_3h
AT4G32560	paramyosin-like protein;(source:Araport11)	NA	IR	AT4G32560_ID4	AT4G32560_ID3	gun1_3h	WT_3h
AT4G32560	paramyosin-like protein;(source:Araport11)	NA	IR	AT4G32560_P2	AT4G32560_ID3	gun1_3h	WT_3h
AT4G32660	Encodes protein kinase AME3.	AME3	A5	AT4G32660_ID183	AT4G32660_ID141	gun1_3h	WT_3h
AT4G32660	Encodes protein kinase AME3.	AME3	IR	AT4G32660_ID183	AT4G32660_ID141	gun1_3h	WT_3h
AT4G33110	S-adenosyl-L-methionine-dependent methyltransferases superfamily protein;(source:Araport11)	NA	A5	AT4G33110_JC2	AT4G33110.2	gun1_3h	WT_3h
AT4G33520	Encodes a putative metal-transporting P-type ATPase PAA1. An alternative-splicing event of the PAA1 pre-mRNA produces a copper chaperon named PCH1. The mRNA is cell-to-cell mobile.	AtHMAC6,HMA6,PAA1,PCH1	A3	AT4G33520_P2	AT4G33520_JC7	gun1_3h	WT_3h
AT4G33520	Encodes a putative metal-transporting P-type ATPase PAA1. An alternative-splicing event of the PAA1 pre-mRNA produces a copper chaperon named PCH1. The mRNA is cell-to-cell mobile.	AtHMAC6,HMA6,PAA1,PCH1	ES	AT4G33520_P2	AT4G33520_JC7	gun1_3h	WT_3h
AT4G34970	A member of actin polymerizing factors (ADFs)family, ADF9 primarily functions as an actin bundling protein.	ADF9	IR	AT4G34970_P1	AT4G34970_JS2	gun1_3h	WT_3h
AT4G35110	phospholipase-like protein (PEARLI 4) family protein;(source:Araport11)	PEARLI_4	A5	AT4G35110_P5	AT4G35110_P2	gun1_3h	WT_3h
AT4G35110	phospholipase-like protein (PEARLI 4) family protein;(source:Araport11)	PEARLI_4	IR	AT4G35110_P5	AT4G35110_P2	gun1_3h	WT_3h
AT4G35310	calmodulin-domain protein kinase CDPK isoform 5 (CPK5)	ATCPK5,CPK5	A5	AT4G35310_P1	AT4G35310_s2	gun1_3h	WT_3h
AT4G35770	Senescence-associated gene that is strongly induced by phosphate starvation. Transcripts are differentially regulated at the level of mRNA stability at different times of day. mRNAs are targets of the mRNA degradation pathway mediated by the downstream (DST) instability determinant.	ATSEN1,DIN1,SEN1,SEN1	A3	AT4G35770_P4	AT4G35770_c2	gun1_3h	WT_3h
AT4G35770	Senescence-associated gene that is strongly induced by phosphate starvation. Transcripts are differentially regulated at the level of mRNA stability at different times of day. mRNAs are targets of the mRNA degradation pathway mediated by the downstream (DST) instability determinant.	ATSEN1,DIN1,SEN1,SEN1	A3	AT4G35770_P1	AT4G35770_c2	gun1_3h	WT_3h
AT4G35770	Senescence-associated gene that is strongly induced by phosphate starvation. Transcripts are differentially regulated at the level of mRNA stability at different times of day. mRNAs are targets of the mRNA degradation pathway mediated by the downstream (DST) instability determinant.	ATSEN1,DIN1,SEN1,SEN1	IR	AT4G35770_P4	AT4G35770_c2	gun1_3h	WT_3h
AT4G35770	Senescence-associated gene that is strongly induced by phosphate starvation. Transcripts are differentially regulated at the level of mRNA stability at different times of day. mRNAs are targets of the mRNA degradation pathway mediated by the downstream (DST) instability determinant.	ATSEN1,DIN1,SEN1,SEN1	IR	AT4G35770_P1	AT4G35770_P2	gun1_3h	WT_3h
AT4G35985	Senescence/dehydration-associated protein-like protein;(source:Araport11)	NA	A3	AT4G35985_P1	AT4G35985_c1	gun1_3h	WT_3h
AT4G35985	Senescence/dehydration-associated protein-like protein;(source:Araport11)	NA	IR	AT4G35985_P1	AT4G35985_P2	gun1_3h	WT_3h
AT4G35985	Senescence/dehydration-associated protein-like protein;(source:Araport11)	NA	IR	AT4G35985_P1	AT4G35985_P3	gun1_3h	WT_3h
AT4G36400	Encodes a (D)-2-hydroxyglutarate dehydrogenase.	D2HGDH	IR	AT4G36400_ID82	AT4G36400_P2	gun1_3h	WT_3h
AT4G36648	other_RNA;(source:Araport11)	NA	IR	AT4G36648.1	AT4G36648_c1	gun1_3h	WT_3h
AT4G36730	member of a gene family encoding basic leucine zipper proteins (GBFs) which bind the G-box	AtGBF1,GBF1	IR	AT4G36730.1	AT4G36730_ID6	gun1_3h	WT_3h
AT4G38040	Exostosin family protein;(source:Araport11)	NA	IR	AT4G38040_ID4	AT4G38040.1	gun1_3h	WT_3h
AT4G38510	One of three genes encoding the vacuolar ATP synthase subunit B1. The protein binds to and co-localizes with F-actin, bundles F-actin to form higher-order structure, and stabilizes actin filaments in vitro.	AtVAB2,VAB2	A5	AT4G38510.3	AT4G38510.2	gun1_3h	WT_3h
AT4G38510	One of three genes encoding the vacuolar ATP synthase subunit B1. The protein binds to and co-localizes with F-actin, bundles F-actin to form higher-order structure, and stabilizes actin filaments in vitro.	AtVAB2,VAB2	ES	AT4G38510.3	AT4G38510.2	gun1_3h	WT_3h
AT4G39090	Similar to cysteine proteinases, induced by desiccation but not abscisic acid. Required for RRS1-R mediated resistance against Ralstonia solanacearum. Interacts with the R. solanacearum type III effector PopP2. RD19 associates with PopP2 to form a nuclear complex that is required for activation of the RRS1-R?mediated resistance response.	RD19,RD19A	IR	AT4G39090_P1	AT4G39090_JC2	gun1_3h	WT_3h
AT5G01910	myelin transcription factor;(source:Araport11)	NA	A3	AT5G01910_ID2	AT5G01910_P1	gun1_3h	WT_3h
AT5G01910	myelin transcription factor;(source:Araport11)	NA	IR	AT5G01910_P2	AT5G01910_P1	gun1_3h	WT_3h
AT5G02040	prenylated RAB acceptor 1.A1;(source:Araport11)	PRA1.A1	A3	AT5G02040.1	AT5G02040_ID2	gun1_3h	WT_3h
AT5G02130	SSR1 encodes a tetratricopeptide repeat- containing protein localized in mitochondria. It is involved in root development, possibly by through effects on auxin transport. In ssr1 mutants, the expression PIN genes and trafficking of PIN2 is altered which in turn affects distribution of auxin in the roots.	NDP1,SSR1	IR	AT5G02130_ID4	AT5G02130_P1	gun1_3h	WT_3h
AT5G02250	Encodes a exoribonuclease involved in rRNA processing in mitochondria and chloroplasts.Loss of function mutations are pale green and require supplementation with sucrose for germination and early development. Plants are pale green due to defects in chloroplast biogenesis.	ATMTRNASEII,EMB2730,RNR1	IR	AT5G02250_P1	AT5G02250_JC6	gun1_3h	WT_3h
AT5G02450	Ribosomal protein L36e family protein;(source:Araport11)	NA	IR	AT5G02450_P1	AT5G02450_JS2	gun1_3h	WT_3h
AT5G02540	NAD(P)-binding Rossmann-fold superfamily protein;(source:Araport11)	NA	A3	AT5G02540_P1	AT5G02540_ID2	gun1_3h	WT_3h
AT5G02540	NAD(P)-binding Rossmann-fold superfamily protein;(source:Araport11)	NA	A3	AT5G02540_P1	AT5G02540_JS7	gun1_3h	WT_3h
AT5G02540	NAD(P)-binding Rossmann-fold superfamily protein;(source:Araport11)	NA	A3	AT5G02540_P1	AT5G02540_s1	gun1_3h	WT_3h
AT5G03180	RING/U-box superfamily protein;(source:Araport11)	NA	A5	AT5G03180_P4	AT5G03180_P2	gun1_3h	WT_3h
AT5G03180	RING/U-box superfamily protein;(source:Araport11)	NA	A5	AT5G03180_ID10	AT5G03180_P2	gun1_3h	WT_3h
AT5G03180	RING/U-box superfamily protein;(source:Araport11)	NA	IR	AT5G03180_ID10	AT5G03180_P2	gun1_3h	WT_3h
AT5G03180	RING/U-box superfamily protein;(source:Araport11)	NA	IR	AT5G03180_ID4	AT5G03180_P2	gun1_3h	WT_3h
AT5G04320	Encodes a protein that protects meiotic centromere cohesion.	AtSGO2,SGO2	IR	AT5G04320.2	AT5G04320.1	gun1_3h	WT_3h
AT5G04320	Encodes a protein that protects meiotic centromere cohesion.	AtSGO2,SGO2	A3	AT5G04320.2	AT5G04320_ID10	gun1_3h	WT_3h
AT5G05310	TLC ATP/ADP transporter;(source:Araport11)	NA	A3	AT5G05310_s3	AT5G05310_c1	gun1_3h	WT_3h
AT5G05310	TLC ATP/ADP transporter;(source:Araport11)	NA	A3	AT5G05310_P7	AT5G05310_c1	gun1_3h	WT_3h
AT5G05310	TLC ATP/ADP transporter;(source:Araport11)	NA	ES	AT5G05310_s3	AT5G05310_c1	gun1_3h	WT_3h
AT5G05310	TLC ATP/ADP transporter;(source:Araport11)	NA	IR	AT5G05310_s3	AT5G05310_c1	gun1_3h	WT_3h
AT5G07300	Encodes a copine-like protein, which is a member of a newly identified class of calcium-dependent, phospholipid binding proteins that are present in a wide range of organisms.	BON2	IR	AT5G07300_P1	AT5G07300_c1	gun1_3h	WT_3h
AT5G07460	ubiquitous enzyme that repairs oxidatively damaged proteins. Methionine sulfoxide reductase activity. Mutant lacking reductase activity showed increased protein oxidation, nitration and glycation of specific amino acid residues during darkness.	ATMSRA2,PMSR2	IR	AT5G07460_P1	AT5G07460_c1	gun1_3h	WT_3h
AT5G07790	hypothetical protein;(source:Araport11)	NA	A5	AT5G07790_P3	AT5G07790_s1	gun1_3h	WT_3h
AT5G07790	hypothetical protein;(source:Araport11)	NA	IR	AT5G07790_P3	AT5G07790_s1	gun1_3h	WT_3h
AT5G07920	Encodes a putative diacylglycerol kinase that is mainly expressed in roots, shoots and leaves, but its enzyme product was not active in vitro.	ATDGK1,DGK1	A3	AT5G07920_P1	AT5G07920_s1	gun1_3h	WT_3h
AT5G09250	putative transcriptional co-activator (KIWI) mRNA, complete	KIWI	IR	AT5G09250_P2	AT5G09250_s1	gun1_3h	WT_3h
AT5G10070	RNase L inhibitor protein-like protein;(source:Araport11)	NA	A3	AT5G10070_ID1	AT5G10070.1	gun1_3h	WT_3h
AT5G10070	RNase L inhibitor protein-like protein;(source:Araport11)	NA	A5	AT5G10070_ID1	AT5G10070.1	gun1_3h	WT_3h
AT5G10070	RNase L inhibitor protein-like protein;(source:Araport11)	NA	A5	AT5G10070_P1	AT5G10070.1	gun1_3h	WT_3h
AT5G10070	RNase L inhibitor protein-like protein;(source:Araport11)	NA	A5	AT5G10070_P2	AT5G10070.1	gun1_3h	WT_3h
AT5G10070	RNase L inhibitor protein-like protein;(source:Araport11)	NA	IR	AT5G10070_P1	AT5G10070.1	gun1_3h	WT_3h
AT5G10980	Histone superfamily protein;(source:Araport11)	H3.3,HTR8	A3	AT5G10980_P1	AT5G10980_ID1	gun1_3h	WT_3h
AT5G10980	Histone superfamily protein;(source:Araport11)	H3.3,HTR8	A5	AT5G10980_P1	AT5G10980_ID1	gun1_3h	WT_3h
AT5G11780	SNF2 domain protein;(source:Araport11)	NA	IR	AT5G11780_ID4	AT5G11780_P1	gun1_3h	WT_3h
AT5G13680	A subunit of Elongator, a histone acetyl transferase complex, consisting of six subunits (ELP1?ELP6), that copurifies with the elongating RNAPII in yeast and humans. Three Arabidopsis thaliana genes, encoding homologs of the yeast Elongator subunits ELP1, ELP3 (histone acetyl transferase), and ELP4 are responsible for the narrow leaf phenotype in elongata mutants and for reduced root growth that …	ABO1,AtELP1,ELO2	A5	AT5G13680_s3	AT5G13680_c3	gun1_3h	WT_3h
AT5G13680	A subunit of Elongator, a histone acetyl transferase complex, consisting of six subunits (ELP1?ELP6), that copurifies with the elongating RNAPII in yeast and humans. Three Arabidopsis thaliana genes, encoding homologs of the yeast Elongator subunits ELP1, ELP3 (histone acetyl transferase), and ELP4 are responsible for the narrow leaf phenotype in elongata mutants and for reduced root growth that …	ABO1,AtELP1,ELO2	ES	AT5G13680_s3	AT5G13680_s2	gun1_3h	WT_3h
AT5G13950	nuclear factor kappa-B-binding protein;(source:Araport11)	NA	A3	AT5G13950_P1	AT5G13950_s1	gun1_3h	WT_3h
AT5G14020	Endosomal targeting BRO1-like domain-containing protein;(source:Araport11)	NA	A3	AT5G14020_s1	AT5G14020_P1	gun1_3h	WT_3h
AT5G14020	Endosomal targeting BRO1-like domain-containing protein;(source:Araport11)	NA	IR	AT5G14020_s1	AT5G14020_P4	gun1_3h	WT_3h
AT5G14680	Adenine nucleotide alpha hydrolases-like superfamily protein;(source:Araport11)	NA	IR	AT5G14680_s1	AT5G14680_P1	gun1_3h	WT_3h
AT5G14740	Encodes a beta carbonic anhydrase likely to be localized in the cytoplasm. Expression of its mRNA is seen in etiolated seedlings and points to a possible nonphotosynthetic role for this isoform.	BETA_CA2,CA18,CA2	IR	AT5G14740_P9	AT5G14740_P6	gun1_3h	WT_3h
AT5G15790	RING/U-box superfamily protein;(source:Araport11)	NA	IR	AT5G15790_P2	AT5G15790_s1	gun1_3h	WT_3h
AT5G16470	zinc finger (C2H2 type) family protein;(source:Araport11)	MBS2	IR	AT5G16470_s1	AT5G16470_P1	gun1_3h	WT_3h
AT5G18500	Protein kinase superfamily protein;(source:Araport11)	NA	IR	AT5G18500_P1	AT5G18500_P2	gun1_3h	WT_3h
AT5G19030	RNA-binding (RRM/RBD/RNP motifs) family protein;(source:Araport11)	NA	A3	AT5G19030_P2	AT5G19030_P5	gun1_3h	WT_3h
AT5G19030	RNA-binding (RRM/RBD/RNP motifs) family protein;(source:Araport11)	NA	IR	AT5G19030_P2	AT5G19030_P5	gun1_3h	WT_3h
AT5G19530	Encodes a spermine synthase. Required for internode elongation and vascular development, specifically in the mechanism that defines the boundaries between veins and nonvein regions. This mechanism may be mediated by polar auxin transport. Though ACL5 has been shown to function as a spermine synthase in E. coli, an ACL5 knockout has no effect on the endogenous levels of free and conjugated polyami…	ACL5	IR	AT5G19530_ID6	AT5G19530.2	gun1_3h	WT_3h
AT5G19900	PRLI-interacting factor;(source:Araport11)	NA	IR	AT5G19900_P3	AT5G19900_P1	gun1_3h	WT_3h
AT5G20140	Encodes a haem-binding protein, HBP5. HBP5 binds haem and interacts with the haem oxygenase, HY1. Disrupting the binding of HBP5 to HY1 leads to oxidative stress.	AtHBP5,HBP5	A3	AT5G20140.1	AT5G20140_ID48	gun1_3h	WT_3h
AT5G21060	Glyceraldehyde-3-phosphate dehydrogenase-like family protein;(source:Araport11)	NA	A3	AT5G21060_P1	AT5G21060_c1	gun1_3h	WT_3h
AT5G21060	Glyceraldehyde-3-phosphate dehydrogenase-like family protein;(source:Araport11)	NA	A3	AT5G21060.2	AT5G21060_c1	gun1_3h	WT_3h
AT5G21060	Glyceraldehyde-3-phosphate dehydrogenase-like family protein;(source:Araport11)	NA	A5	AT5G21060.2	AT5G21060_c1	gun1_3h	WT_3h
AT5G21060	Glyceraldehyde-3-phosphate dehydrogenase-like family protein;(source:Araport11)	NA	A5	AT5G21060_P1	AT5G21060_c1	gun1_3h	WT_3h
AT5G21160	Encodes a protein with sequence similarity to mRNA binding proteins from humans. LARP1a is involved in mRNA degradation in response to heat stress. Upon heat stress LARP1a interacts with XRN4 and appears to be responsible for addressing XRN4 to the polysome. LARP1/XRN4 double mutants are impaired in thermotolerance and lower levels of heat induced RNA turnover.	AtLARP1a,LARP1a	A3	AT5G21160_P1	AT5G21160.2	gun1_3h	WT_3h
AT5G21160	Encodes a protein with sequence similarity to mRNA binding proteins from humans. LARP1a is involved in mRNA degradation in response to heat stress. Upon heat stress LARP1a interacts with XRN4 and appears to be responsible for addressing XRN4 to the polysome. LARP1/XRN4 double mutants are impaired in thermotolerance and lower levels of heat induced RNA turnover.	AtLARP1a,LARP1a	IR	AT5G21160_P1	AT5G21160.2	gun1_3h	WT_3h
AT5G21930	P-Type ATPase, mediates copper transport to chloroplast thylakoid lumen. Required for accumulation of copper-containing plastocyanin in the thylakoid lumen and for effective photosynthetic electron transport	ATHMA8,HMA8,PAA2	A3	AT5G21930_JS5	AT5G21930_c2	gun1_3h	WT_3h
AT5G21930	P-Type ATPase, mediates copper transport to chloroplast thylakoid lumen. Required for accumulation of copper-containing plastocyanin in the thylakoid lumen and for effective photosynthetic electron transport	ATHMA8,HMA8,PAA2	A5	AT5G21930_JS5	AT5G21930_c2	gun1_3h	WT_3h
AT5G21930	P-Type ATPase, mediates copper transport to chloroplast thylakoid lumen. Required for accumulation of copper-containing plastocyanin in the thylakoid lumen and for effective photosynthetic electron transport	ATHMA8,HMA8,PAA2	ES	AT5G21930_JS5	AT5G21930_c2	gun1_3h	WT_3h
AT5G21930	P-Type ATPase, mediates copper transport to chloroplast thylakoid lumen. Required for accumulation of copper-containing plastocyanin in the thylakoid lumen and for effective photosynthetic electron transport	ATHMA8,HMA8,PAA2	IR	AT5G21930_JS5	AT5G21930_c2	gun1_3h	WT_3h
AT5G22010	Encodes RFC1, the largest subunit of replication factor C. Mediates genomic stability and transcriptional gene silencing.	AtRFC1,RFC1,RFC1	IR	AT5G22010_P1	AT5G22010_ID41	gun1_3h	WT_3h
AT5G22010	Encodes RFC1, the largest subunit of replication factor C. Mediates genomic stability and transcriptional gene silencing.	AtRFC1,RFC1,RFC1	IR	AT5G22010_P1	AT5G22010_ID44	gun1_3h	WT_3h
AT5G22010	Encodes RFC1, the largest subunit of replication factor C. Mediates genomic stability and transcriptional gene silencing.	AtRFC1,RFC1,RFC1	IR	AT5G22010_P1	AT5G22010_ID83	gun1_3h	WT_3h
AT5G22050	Protein kinase superfamily protein;(source:Araport11)	NA	IR	AT5G22050_ID1	AT5G22050.2	gun1_3h	WT_3h
AT5G22620	encodes a putative 2-carboxy-D-arabinitol 1-phosphate phosphatase	NA	A3	AT5G22620_ID15	AT5G22620_c4	gun1_3h	WT_3h
AT5G22620	encodes a putative 2-carboxy-D-arabinitol 1-phosphate phosphatase	NA	IR	AT5G22620_ID15	AT5G22620_c4	gun1_3h	WT_3h
AT5G22860	Serine carboxypeptidase S28 family protein;(source:Araport11)	NA	A3	AT5G22860_P1	AT5G22860_JS2	gun1_3h	WT_3h
AT5G22860	Serine carboxypeptidase S28 family protein;(source:Araport11)	NA	IR	AT5G22860_P1	AT5G22860_P2	gun1_3h	WT_3h
AT5G23750	Remorin family protein;(source:Araport11)	NA	A3	AT5G23750_P1	AT5G23750_ID13	gun1_3h	WT_3h
AT5G23750	Remorin family protein;(source:Araport11)	NA	IR	AT5G23750_P1	AT5G23750_ID13	gun1_3h	WT_3h
AT5G23750	Remorin family protein;(source:Araport11)	NA	IR	AT5G23750_P1	AT5G23750_s1	gun1_3h	WT_3h
AT5G24120	Encodes a specialized sigma factor that functions in regulation of plastid genes and is responsible for the light-dependent transcription at the psbD LRP. Activation of SIG5 is dependent upon blue light and mediated by cryptochromes.	ATSIG5,SIG5,SIGE	IR	AT5G24120_P1	AT5G24120_c2	gun1_3h	WT_3h
AT5G24630	This gene is predicted to encode a protein that forms part of the topoisomerase VI complex. BIN4 is a nuclear-localized protein that can bind DNA. bin4 mutants are brassinolide-insensitive dwarves with severely reduced cell size in leaves, roots, and hypocotyls. Proper development of root hairs and trichomes is also disrupted in bin4 mutants and they have elevated levels of double strand breaks i…	BIN4,MID	A3	AT5G24630_ID24	AT5G24630_ID19	gun1_3h	WT_3h
AT5G24630	This gene is predicted to encode a protein that forms part of the topoisomerase VI complex. BIN4 is a nuclear-localized protein that can bind DNA. bin4 mutants are brassinolide-insensitive dwarves with severely reduced cell size in leaves, roots, and hypocotyls. Proper development of root hairs and trichomes is also disrupted in bin4 mutants and they have elevated levels of double strand breaks i…	BIN4,MID	IR	AT5G24630_ID24	AT5G24630_ID19	gun1_3h	WT_3h
AT5G24630	This gene is predicted to encode a protein that forms part of the topoisomerase VI complex. BIN4 is a nuclear-localized protein that can bind DNA. bin4 mutants are brassinolide-insensitive dwarves with severely reduced cell size in leaves, roots, and hypocotyls. Proper development of root hairs and trichomes is also disrupted in bin4 mutants and they have elevated levels of double strand breaks i…	BIN4,MID	IR	AT5G24630_ID24	AT5G24630_ID21	gun1_3h	WT_3h
AT5G24630	This gene is predicted to encode a protein that forms part of the topoisomerase VI complex. BIN4 is a nuclear-localized protein that can bind DNA. bin4 mutants are brassinolide-insensitive dwarves with severely reduced cell size in leaves, roots, and hypocotyls. Proper development of root hairs and trichomes is also disrupted in bin4 mutants and they have elevated levels of double strand breaks i…	BIN4,MID	ES	AT5G24630_ID24	AT5G24630_P8	gun1_3h	WT_3h
AT5G24630	This gene is predicted to encode a protein that forms part of the topoisomerase VI complex. BIN4 is a nuclear-localized protein that can bind DNA. bin4 mutants are brassinolide-insensitive dwarves with severely reduced cell size in leaves, roots, and hypocotyls. Proper development of root hairs and trichomes is also disrupted in bin4 mutants and they have elevated levels of double strand breaks i…	BIN4,MID	IR	AT5G24630_ID24	AT5G24630_P8	gun1_3h	WT_3h
AT5G24750	UDP-Glycosyltransferase superfamily protein;(source:Araport11)	NA	A3	AT5G24750_ID3	AT5G24750_JS1	gun1_3h	WT_3h
AT5G25475	AP2/B3-like transcriptional factor family protein;(source:Araport11)	NA	A5	AT5G25475_P2	AT5G25475.3	gun1_3h	WT_3h
AT5G25475	AP2/B3-like transcriptional factor family protein;(source:Araport11)	NA	A5	AT5G25475_P2	AT5G25475_P1	gun1_3h	WT_3h
AT5G25475	AP2/B3-like transcriptional factor family protein;(source:Araport11)	NA	IR	AT5G25475_P2	AT5G25475_P1	gun1_3h	WT_3h
AT5G26280	TRAF-like family protein;(source:Araport11)	NA	A3	AT5G26280_P3	AT5G26280_c2	gun1_3h	WT_3h
AT5G26290	MATH domain containing TRAF-like protein. Mutants show defects in both male and female gametophyte development.Potentially regulated by siRNA/miRNA as a number of siRNA's map to the locus as well as miR777.	RAMGaP	IR	AT5G26290_ID1	AT5G26290_s2	gun1_3h	WT_3h
AT5G35160	Endomembrane protein 70 protein family;(source:Araport11)	TMN11	IR	AT5G35160_P2	AT5G35160_P4	gun1_3h	WT_3h
AT5G37000	glycosyltransferase family exostosin protein;(source:Araport11)	NA	A5	AT5G37000_P1	AT5G37000_c2	gun1_3h	WT_3h
AT5G37510	Encodes a subunit of the 400 kDa subcomplex of the mitochondrial NADH dehydrogenase (complex I). The protein has been isolated in the male gametophyte. The mRNA is cell-to-cell mobile.	CI76,EMB1467	A3	AT5G37510_P1	AT5G37510_ID3	gun1_3h	WT_3h
AT5G37510	Encodes a subunit of the 400 kDa subcomplex of the mitochondrial NADH dehydrogenase (complex I). The protein has been isolated in the male gametophyte. The mRNA is cell-to-cell mobile.	CI76,EMB1467	A5	AT5G37510_P1	AT5G37510_ID3	gun1_3h	WT_3h
AT5G37510	Encodes a subunit of the 400 kDa subcomplex of the mitochondrial NADH dehydrogenase (complex I). The protein has been isolated in the male gametophyte. The mRNA is cell-to-cell mobile.	CI76,EMB1467	MES	AT5G37510_P1	AT5G37510_ID3	gun1_3h	WT_3h
AT5G38360	alpha/beta-Hydrolases superfamily protein;(source:Araport11)	NA	IR	AT5G38360_P2	AT5G38360_P3	gun1_3h	WT_3h
AT5G38660	mutant has Altered acclimation responses;	APE1	A3	AT5G38660.2	AT5G38660_P1	gun1_3h	WT_3h
AT5G38660	mutant has Altered acclimation responses;	APE1	A5	AT5G38660.2	AT5G38660_P1	gun1_3h	WT_3h
AT5G38660	mutant has Altered acclimation responses;	APE1	IR	AT5G38660.2	AT5G38660_P1	gun1_3h	WT_3h
AT5G39340	Encodes AHP3, one of the six Arabidopsis thaliana histidine phosphotransfer proteins (AHPs) involved in Histidine (His)-to-Aspartate (Asp) phosphorelay signal transduction. AHPs function as redundant positive regulators of cytokinin signaling. Members of the AHP gene family include: AT3G21510 (AHP1), AT3G29350 (AHP2), AT5G39340 (AHP3), AT3G16360 (AHP4), AT1G03430 (AHP5) and AT1G80100 (AHP6).	AHP3,ATHP2	IR	AT5G39340_P4	AT5G39340_c1	gun1_3h	WT_3h
AT5G39340	Encodes AHP3, one of the six Arabidopsis thaliana histidine phosphotransfer proteins (AHPs) involved in Histidine (His)-to-Aspartate (Asp) phosphorelay signal transduction. AHPs function as redundant positive regulators of cytokinin signaling. Members of the AHP gene family include: AT3G21510 (AHP1), AT3G29350 (AHP2), AT5G39340 (AHP3), AT3G16360 (AHP4), AT1G03430 (AHP5) and AT1G80100 (AHP6).	AHP3,ATHP2	IR	AT5G39340_P4	AT5G39340_ID2	gun1_3h	WT_3h
AT5G39340	Encodes AHP3, one of the six Arabidopsis thaliana histidine phosphotransfer proteins (AHPs) involved in Histidine (His)-to-Aspartate (Asp) phosphorelay signal transduction. AHPs function as redundant positive regulators of cytokinin signaling. Members of the AHP gene family include: AT3G21510 (AHP1), AT3G29350 (AHP2), AT5G39340 (AHP3), AT3G16360 (AHP4), AT1G03430 (AHP5) and AT1G80100 (AHP6).	AHP3,ATHP2	IR	AT5G39340_P4	AT5G39340_JC4	gun1_3h	WT_3h
AT5G40060	Disease resistance protein (NBS-LRR class) family;(source:Araport11)	NA	IR	AT5G40060_s1	AT5G40060_P1	gun1_3h	WT_3h
AT5G40280	encodes a beta subunit of farnesyl-trans-transferase, which is involved in meristem organization and ABA-mediated signal transduction pathway. Mutant phenotypes have been observed in meristem organization, and response to abscisic acid and drought. The mRNA is cell-to-cell mobile.	ATFTB,ERA1,WIG	A5	AT5G40280_JS1	AT5G40280_P2	gun1_3h	WT_3h
AT5G40280	encodes a beta subunit of farnesyl-trans-transferase, which is involved in meristem organization and ABA-mediated signal transduction pathway. Mutant phenotypes have been observed in meristem organization, and response to abscisic acid and drought. The mRNA is cell-to-cell mobile.	ATFTB,ERA1,WIG	IR	AT5G40280_P1	AT5G40280_P2	gun1_3h	WT_3h
AT5G40280	encodes a beta subunit of farnesyl-trans-transferase, which is involved in meristem organization and ABA-mediated signal transduction pathway. Mutant phenotypes have been observed in meristem organization, and response to abscisic acid and drought. The mRNA is cell-to-cell mobile.	ATFTB,ERA1,WIG	IR	AT5G40280_JS1	AT5G40280_P2	gun1_3h	WT_3h
AT5G40550	SGF29 tudor-like domain-containing protein;(source:Araport11)	AtSGF29b,SGF29b	A5	AT5G40550_ID8	AT5G40550_JC6	gun1_3h	WT_3h
AT5G40550	SGF29 tudor-like domain-containing protein;(source:Araport11)	AtSGF29b,SGF29b	IR	AT5G40550_ID8	AT5G40550_JC6	gun1_3h	WT_3h
AT5G40550	SGF29 tudor-like domain-containing protein;(source:Araport11)	AtSGF29b,SGF29b	A3	AT5G40550_ID8	AT5G40550_P4	gun1_3h	WT_3h
AT5G42180	Peroxidase required for casparian strip lignification as well as partially required for SGN-dependent compensatory lignification.	PER64,PRX64	A3	AT5G42180_ID2	AT5G42180_P1	gun1_3h	WT_3h
AT5G42180	Peroxidase required for casparian strip lignification as well as partially required for SGN-dependent compensatory lignification.	PER64,PRX64	A5	AT5G42180_ID2	AT5G42180_P1	gun1_3h	WT_3h
AT5G42400	Encodes ATXR7 (ARABIDOPSIS TRITHORAX-RELATED7), required for histone H3-K4 methylation and for transcriptional activation of Flowering Locus C.	ATXR7,SDG25	A3	AT5G42400_JS34	AT5G42400_JS42	gun1_3h	WT_3h
AT5G42400	Encodes ATXR7 (ARABIDOPSIS TRITHORAX-RELATED7), required for histone H3-K4 methylation and for transcriptional activation of Flowering Locus C.	ATXR7,SDG25	A5	AT5G42400_JS34	AT5G42400_JS42	gun1_3h	WT_3h
AT5G42400	Encodes ATXR7 (ARABIDOPSIS TRITHORAX-RELATED7), required for histone H3-K4 methylation and for transcriptional activation of Flowering Locus C.	ATXR7,SDG25	IR	AT5G42400_JS34	AT5G42400_JS42	gun1_3h	WT_3h
AT5G42400	Encodes ATXR7 (ARABIDOPSIS TRITHORAX-RELATED7), required for histone H3-K4 methylation and for transcriptional activation of Flowering Locus C.	ATXR7,SDG25	A3	AT5G42400_JS34	AT5G42400_JS49	gun1_3h	WT_3h
AT5G42400	Encodes ATXR7 (ARABIDOPSIS TRITHORAX-RELATED7), required for histone H3-K4 methylation and for transcriptional activation of Flowering Locus C.	ATXR7,SDG25	A5	AT5G42400_JS34	AT5G42400_JS49	gun1_3h	WT_3h
AT5G42670	Agenet domain-containing protein;(source:Araport11)	NA	A5	AT5G42670_ID7	AT5G42670_P1	gun1_3h	WT_3h
AT5G43710	Glycosyl hydrolase family 47 protein;(source:Araport11)	MNS4	A3	AT5G43710_JC12	AT5G43710_s6	gun1_3h	WT_3h
AT5G43710	Glycosyl hydrolase family 47 protein;(source:Araport11)	MNS4	A5	AT5G43710_JC12	AT5G43710_s6	gun1_3h	WT_3h
AT5G43710	Glycosyl hydrolase family 47 protein;(source:Araport11)	MNS4	IR	AT5G43710_JC12	AT5G43710_s6	gun1_3h	WT_3h
AT5G44610	Encodes a protein with seven repeated VEEKK motifs. RNAi and overexpression experiments suggest that the gene is not involved in cell division but might be consequential for cell shape of epidermal and cortical cells. The protein encoded by this gene binds to cortical microtubules and inhibits tubulin polymerization. Associates to the plasma membrane and interacts with calmodulin and phosphatidyl…	MAP18,PCAP2	A5	AT5G44610_c1	AT5G44610_P1	gun1_3h	WT_3h
AT5G45370	nodulin MtN21-like transporter family protein	UMAMIT1	IR	AT5G45370_P2	AT5G45370_P4	gun1_3h	WT_3h
AT5G45840	Encodes a leucine-rich-repeat RLK that is localized to the plasma membrane of pollen tubes and functions with MIK1/2 as the male receptor of the pollen tube chemo-attractant LURE1.MDIS1 forms a complex with MIK1/2 and binds LURE1.	MDIS1	A5	AT5G45840_c1	AT5G45840_JS5	gun1_3h	WT_3h
AT5G45840	Encodes a leucine-rich-repeat RLK that is localized to the plasma membrane of pollen tubes and functions with MIK1/2 as the male receptor of the pollen tube chemo-attractant LURE1.MDIS1 forms a complex with MIK1/2 and binds LURE1.	MDIS1	A5	AT5G45840_JS2	AT5G45840_JS5	gun1_3h	WT_3h
AT5G45840	Encodes a leucine-rich-repeat RLK that is localized to the plasma membrane of pollen tubes and functions with MIK1/2 as the male receptor of the pollen tube chemo-attractant LURE1.MDIS1 forms a complex with MIK1/2 and binds LURE1.	MDIS1	IR	AT5G45840_JS2	AT5G45840_JS5	gun1_3h	WT_3h
AT5G46470	Encodes RPS6 (RESISTANT TO P. SYRINGAE 6), a member of the TIR-NBS-LRR class resistance protein. The mRNA is cell-to-cell mobile.	RPS6	IR	AT5G46470_ID41	AT5G46470_ID25	gun1_3h	WT_3h
AT5G46470	Encodes RPS6 (RESISTANT TO P. SYRINGAE 6), a member of the TIR-NBS-LRR class resistance protein. The mRNA is cell-to-cell mobile.	RPS6	IR	AT5G46470_ID41	AT5G46470_ID29	gun1_3h	WT_3h
AT5G46690	beta HLH protein 71;(source:Araport11)	bHLH071	A3	AT5G46690_ID6	AT5G46690_s1	gun1_3h	WT_3h
AT5G46690	beta HLH protein 71;(source:Araport11)	bHLH071	IR	AT5G46690_ID6	AT5G46690_s1	gun1_3h	WT_3h
AT5G46860	Syntaxin-related protein required for vacuolar assembly. A member of t-SNARE superfamily, homologous to yest Vam3p. Localized in the vacuolar membranes. The protein has a heptad repeat structure (residues164?220) in which hydrophobic amino acid residues appear at seven amino acid intervals. Such regions have a high potential to form an amphiphilic a-helix, intriguing for the intermolecular intera…	ATSYP22,ATVAM3,SGR3,SYP22,VAM3	A3	AT5G46860_P1	AT5G46860_c1	gun1_3h	WT_3h
AT5G46860	Syntaxin-related protein required for vacuolar assembly. A member of t-SNARE superfamily, homologous to yest Vam3p. Localized in the vacuolar membranes. The protein has a heptad repeat structure (residues164?220) in which hydrophobic amino acid residues appear at seven amino acid intervals. Such regions have a high potential to form an amphiphilic a-helix, intriguing for the intermolecular intera…	ATSYP22,ATVAM3,SGR3,SYP22,VAM3	A5	AT5G46860_P1	AT5G46860_c1	gun1_3h	WT_3h
AT5G46860	Syntaxin-related protein required for vacuolar assembly. A member of t-SNARE superfamily, homologous to yest Vam3p. Localized in the vacuolar membranes. The protein has a heptad repeat structure (residues164?220) in which hydrophobic amino acid residues appear at seven amino acid intervals. Such regions have a high potential to form an amphiphilic a-helix, intriguing for the intermolecular intera…	ATSYP22,ATVAM3,SGR3,SYP22,VAM3	ES	AT5G46860_P1	AT5G46860_c1	gun1_3h	WT_3h
AT5G46880	homeobox-7;(source:Araport11)	HB-7,HDG5	A5	AT5G46880_P3	AT5G46880_JS1	gun1_3h	WT_3h
AT5G46880	homeobox-7;(source:Araport11)	HB-7,HDG5	IR	AT5G46880_P3	AT5G46880_JS1	gun1_3h	WT_3h
AT5G47180	Plant VAMP (vesicle-associated membrane protein) family protein;(source:Araport11)	NA	IR	AT5G47180_P2	AT5G47180_P1	gun1_3h	WT_3h
AT5G47455	hypothetical protein;(source:Araport11)	NA	A3	AT5G47455_P9	AT5G47455.4	gun1_3h	WT_3h
AT5G47455	hypothetical protein;(source:Araport11)	NA	A5	AT5G47455_P9	AT5G47455.4	gun1_3h	WT_3h
AT5G47455	hypothetical protein;(source:Araport11)	NA	IR	AT5G47455_P9	AT5G47455.4	gun1_3h	WT_3h
AT5G47455	hypothetical protein;(source:Araport11)	NA	MES	AT5G47455_P9	AT5G47455.4	gun1_3h	WT_3h
AT5G47455	hypothetical protein;(source:Araport11)	NA	A5	AT5G47455_P9	AT5G47455_ID1	gun1_3h	WT_3h
AT5G47455	hypothetical protein;(source:Araport11)	NA	IR	AT5G47455_P9	AT5G47455_ID1	gun1_3h	WT_3h
AT5G47730	Sec14p-like phosphatidylinositol transfer family protein;(source:Araport11)	NA	IR	AT5G47730.3	AT5G47730_P2	gun1_3h	WT_3h
AT5G47730	Sec14p-like phosphatidylinositol transfer family protein;(source:Araport11)	NA	IR	AT5G47730.3	AT5G47730_s1	gun1_3h	WT_3h
AT5G48000	Encodes a member of the CYP708A family of cytochrome P450 enzymes. THAH appears to add a hydroxyl group to the triterpene thalianol. thah1 mutants have an elevated accumulation of thalianol. thah1-1 mutants have longer roots than wild type plants. Thalian-diol and desaturated thalian-diol are lost from the root extracts of thah1-1 mutants. Overexpression of the sequence from At5g48000.1 rescues t…	CYP708_A2,CYP708A2,THAH,THAH1	A3	AT5G48000_P6	AT5G48000_P1	gun1_3h	WT_3h
AT5G48000	Encodes a member of the CYP708A family of cytochrome P450 enzymes. THAH appears to add a hydroxyl group to the triterpene thalianol. thah1 mutants have an elevated accumulation of thalianol. thah1-1 mutants have longer roots than wild type plants. Thalian-diol and desaturated thalian-diol are lost from the root extracts of thah1-1 mutants. Overexpression of the sequence from At5g48000.1 rescues t…	CYP708_A2,CYP708A2,THAH,THAH1	A5	AT5G48000_P6	AT5G48000_P1	gun1_3h	WT_3h
AT5G48000	Encodes a member of the CYP708A family of cytochrome P450 enzymes. THAH appears to add a hydroxyl group to the triterpene thalianol. thah1 mutants have an elevated accumulation of thalianol. thah1-1 mutants have longer roots than wild type plants. Thalian-diol and desaturated thalian-diol are lost from the root extracts of thah1-1 mutants. Overexpression of the sequence from At5g48000.1 rescues t…	CYP708_A2,CYP708A2,THAH,THAH1	IR	AT5G48000_P6	AT5G48000_P1	gun1_3h	WT_3h
AT5G48000	Encodes a member of the CYP708A family of cytochrome P450 enzymes. THAH appears to add a hydroxyl group to the triterpene thalianol. thah1 mutants have an elevated accumulation of thalianol. thah1-1 mutants have longer roots than wild type plants. Thalian-diol and desaturated thalian-diol are lost from the root extracts of thah1-1 mutants. Overexpression of the sequence from At5g48000.1 rescues t…	CYP708_A2,CYP708A2,THAH,THAH1	A3	AT5G48000_P6	AT5G48000_P3	gun1_3h	WT_3h
AT5G48000	Encodes a member of the CYP708A family of cytochrome P450 enzymes. THAH appears to add a hydroxyl group to the triterpene thalianol. thah1 mutants have an elevated accumulation of thalianol. thah1-1 mutants have longer roots than wild type plants. Thalian-diol and desaturated thalian-diol are lost from the root extracts of thah1-1 mutants. Overexpression of the sequence from At5g48000.1 rescues t…	CYP708_A2,CYP708A2,THAH,THAH1	IR	AT5G48000_P6	AT5G48000_P3	gun1_3h	WT_3h
AT5G48610	myb-like protein X;(source:Araport11)	NA	A5	AT5G48610_P4	AT5G48610_P5	gun1_3h	WT_3h
AT5G48610	myb-like protein X;(source:Araport11)	NA	IR	AT5G48610_P3	AT5G48610_P5	gun1_3h	WT_3h
AT5G48610	myb-like protein X;(source:Araport11)	NA	IR	AT5G48610_P4	AT5G48610_P5	gun1_3h	WT_3h
AT5G49230	Identified in a screen for mutations hypersensitive to red and blue light. Mutants have shorter hypocotyls. Encodes a nuclear localized protein with similarity to drought induced proteins. Contains a ZZ zinc finger domain which is thought to mediate protein-protein interactions.May be involved in red and blue light signal transduction.	HRB1	IR	AT5G49230_ID5	AT5G49230_P1	gun1_3h	WT_3h
AT5G49300	Encodes a member of the GATA factor family of zinc finger transcription factors.	GATA16	IR	AT5G49300_P1	AT5G49300_ID1	gun1_3h	WT_3h
AT5G49710	RING finger protein;(source:Araport11)	NA	A3	AT5G49710.3	AT5G49710_c2	gun1_3h	WT_3h
AT5G49710	RING finger protein;(source:Araport11)	NA	IR	AT5G49710.3	AT5G49710_c2	gun1_3h	WT_3h
AT5G51620	Uncharacterized protein family (UPF0172);(source:Araport11)	NA	A5	AT5G51620.1	AT5G51620_P1	gun1_3h	WT_3h
AT5G51620	Uncharacterized protein family (UPF0172);(source:Araport11)	NA	IR	AT5G51620.1	AT5G51620_P1	gun1_3h	WT_3h
AT5G51970	Encodes a sorbitol dehydrogenase that exhibits greatest oxidative activity with sorbitol, ribitol and xylitol as substrates. SDH can be thiolated in vitro.	ATSDH	IR	AT5G51970.1	AT5G51970_ID7	gun1_3h	WT_3h
AT5G53470	Encodes an acyl-CoA binding protein that is localized to vesicles,and plasma membrane especially in epidermal cells of heart, torpedo and cotyledon stage embryos, cell wall of the seed coat. Northern blot analysis showed that the 1.4 kb ACBP1 mRNA was expressed in silique, root, stem, leaf and flower.	ACBP,ACBP1,AtACBP1	ES	AT5G53470.1	AT5G53470_ID1	gun1_3h	WT_3h
AT5G53860	Encodes a plant-specific protein with a domain similar to the central cysteine-rich domain of DnaJ proteins. It is involved in chloroplast and leaf development.	ANU7,EMB2737,EMB64	A3	AT5G53860.3	AT5G53860.2	gun1_3h	WT_3h
AT5G53860	Encodes a plant-specific protein with a domain similar to the central cysteine-rich domain of DnaJ proteins. It is involved in chloroplast and leaf development.	ANU7,EMB2737,EMB64	A5	AT5G53860.3	AT5G53860.2	gun1_3h	WT_3h
AT5G53860	Encodes a plant-specific protein with a domain similar to the central cysteine-rich domain of DnaJ proteins. It is involved in chloroplast and leaf development.	ANU7,EMB2737,EMB64	ES	AT5G53860.3	AT5G53860.2	gun1_3h	WT_3h
AT5G53860	Encodes a plant-specific protein with a domain similar to the central cysteine-rich domain of DnaJ proteins. It is involved in chloroplast and leaf development.	ANU7,EMB2737,EMB64	A3	AT5G53860.3	AT5G53860_JS9	gun1_3h	WT_3h
AT5G53860	Encodes a plant-specific protein with a domain similar to the central cysteine-rich domain of DnaJ proteins. It is involved in chloroplast and leaf development.	ANU7,EMB2737,EMB64	A5	AT5G53860.3	AT5G53860_JS9	gun1_3h	WT_3h
AT5G53860	Encodes a plant-specific protein with a domain similar to the central cysteine-rich domain of DnaJ proteins. It is involved in chloroplast and leaf development.	ANU7,EMB2737,EMB64	ES	AT5G53860.3	AT5G53860_JS9	gun1_3h	WT_3h
AT5G53860	Encodes a plant-specific protein with a domain similar to the central cysteine-rich domain of DnaJ proteins. It is involved in chloroplast and leaf development.	ANU7,EMB2737,EMB64	IR	AT5G53860.3	AT5G53860_JS9	gun1_3h	WT_3h
AT5G54090	DNA mismatch repair protein MutS, type 2;(source:Araport11)	NA	A3	AT5G54090_s1	AT5G54090_P1	gun1_3h	WT_3h
AT5G55100	SWAP (Suppressor-of-White-APricot)/surp domain-containing protein;(source:Araport11)	NA	ES	AT5G55100_ID20	AT5G55100_P3	gun1_3h	WT_3h
AT5G55100	SWAP (Suppressor-of-White-APricot)/surp domain-containing protein;(source:Araport11)	NA	IR	AT5G55100_ID20	AT5G55100_P3	gun1_3h	WT_3h
AT5G55550	RNA-binding (RRM/RBD/RNP motifs) family protein;(source:Araport11)	NA	ES	AT5G55550_ID4	AT5G55550_ID1	gun1_3h	WT_3h
AT5G55550	RNA-binding (RRM/RBD/RNP motifs) family protein;(source:Araport11)	NA	IR	AT5G55550_ID4	AT5G55550_ID1	gun1_3h	WT_3h
AT5G55550	RNA-binding (RRM/RBD/RNP motifs) family protein;(source:Araport11)	NA	IR	AT5G55550_P1	AT5G55550_ID1	gun1_3h	WT_3h
AT5G55580	Encodes a mitochondrial transcription termination factor (mTERF) family protein. The gene product is targeted to the chloroplast nucleoid and mutants are affected in plastid gene expression and chloroplast development. Mutants, named as twirt1 (twr-1), display altered root meristem function resulting in short roots. Mutation also affects shoot meristem function.	mTERF9	IR	AT5G55580.1	AT5G55580_ID6	gun1_3h	WT_3h
AT5G57060	60S ribosomal L18a-like protein;(source:Araport11)	NA	IR	AT5G57060_P8	AT5G57060_P6	gun1_3h	WT_3h
AT5G57150	basic helix-loop-helix (bHLH) DNA-binding superfamily protein;(source:Araport11)	NA	A3	AT5G57150_P2	AT5G57150_ID4	gun1_3h	WT_3h
AT5G57150	basic helix-loop-helix (bHLH) DNA-binding superfamily protein;(source:Araport11)	NA	IR	AT5G57150_P2	AT5G57150_ID4	gun1_3h	WT_3h
AT5G58100	Encodes a membrane protein involved in pollen nexine and sexine development.	NA	IR	AT5G58100_P1	AT5G58100_ID1	gun1_3h	WT_3h
AT5G58500	LIGHT-DEPENDENT SHORT HYPOCOTYLS-like protein (DUF640);(source:Araport11)	LSH5	IR	AT5G58500_c1	AT5G58500_P1	gun1_3h	WT_3h
AT5G58620	Involved in control of defence gene expression post-transcriptionally through release from translation arrest within TZF9-PAB2-containing RNA granules. TZF9 shows phospho-mobility shift after flg22 treatment, inferred to be caused by phosphorylation through MPK3 and/or MPK6. The major MPK3/6-targeted phospho-sites are S181, S323, S343, S352, S356, S362 and S377.	TZF9	A5	AT5G58620_P1	AT5G58620_c1	gun1_3h	WT_3h
AT5G59430	Encodes a telomeric repeat binding protein with a DNA binding domain at its C terminus. The DNA binding domain has a preference for GGTTTAG sequences and at least five of these repeats are required for recognition by a nearly full-length TRP1 protein.	ATTRP1,TRP1	IR	AT5G59430_P2	AT5G59430.3	gun1_3h	WT_3h
AT5G59470	Mannose-P-dolichol utilization defect 1 protein;(source:Araport11)	NA	IR	AT5G59470_P2	AT5G59470_P1	gun1_3h	WT_3h
AT5G60210	Encodes RIP5 (ROP interactive partner 5), a putative Rho protein effector, interacting specifically with the active form of ROPs (Rho proteins of plants).	RIP5	A5	AT5G60210_P2	AT5G60210_P4	gun1_3h	WT_3h
AT5G60210	Encodes RIP5 (ROP interactive partner 5), a putative Rho protein effector, interacting specifically with the active form of ROPs (Rho proteins of plants).	RIP5	IR	AT5G60210_P2	AT5G60210_P4	gun1_3h	WT_3h
AT5G60210	Encodes RIP5 (ROP interactive partner 5), a putative Rho protein effector, interacting specifically with the active form of ROPs (Rho proteins of plants).	RIP5	A5	AT5G60210_P2	AT5G60210_s2	gun1_3h	WT_3h
AT5G60210	Encodes RIP5 (ROP interactive partner 5), a putative Rho protein effector, interacting specifically with the active form of ROPs (Rho proteins of plants).	RIP5	IR	AT5G60210_P2	AT5G60210_s2	gun1_3h	WT_3h
AT5G61190	putative endonuclease or glycosyl hydrolase with C2H2-type zinc finger domain-containing protein;(source:Araport11)	NA	A3	AT5G61190_s3	AT5G61190_JS11	gun1_3h	WT_3h
AT5G61190	putative endonuclease or glycosyl hydrolase with C2H2-type zinc finger domain-containing protein;(source:Araport11)	NA	IR	AT5G61190_s3	AT5G61190_JS11	gun1_3h	WT_3h
AT5G61190	putative endonuclease or glycosyl hydrolase with C2H2-type zinc finger domain-containing protein;(source:Araport11)	NA	A3	AT5G61190_s3	AT5G61190_P8	gun1_3h	WT_3h
AT5G61190	putative endonuclease or glycosyl hydrolase with C2H2-type zinc finger domain-containing protein;(source:Araport11)	NA	IR	AT5G61190_s3	AT5G61190_P8	gun1_3h	WT_3h
AT5G61560	Plant U-box type E3 ubiquitin ligase (PUB).	NA	A3	AT5G61560.2	AT5G61560_c1	gun1_3h	WT_3h
AT5G61560	Plant U-box type E3 ubiquitin ligase (PUB).	NA	A3	AT5G61560_P5	AT5G61560_c1	gun1_3h	WT_3h
AT5G61560	Plant U-box type E3 ubiquitin ligase (PUB).	NA	IR	AT5G61560_P5	AT5G61560_c1	gun1_3h	WT_3h
AT5G61560	Plant U-box type E3 ubiquitin ligase (PUB).	NA	A3	AT5G61560.2	AT5G61560_P1	gun1_3h	WT_3h
AT5G61560	Plant U-box type E3 ubiquitin ligase (PUB).	NA	IR	AT5G61560_P5	AT5G61560_P1	gun1_3h	WT_3h
AT5G61560	Plant U-box type E3 ubiquitin ligase (PUB).	NA	A3	AT5G61560.2	AT5G61560_P3	gun1_3h	WT_3h
AT5G61560	Plant U-box type E3 ubiquitin ligase (PUB).	NA	IR	AT5G61560.2	AT5G61560_P3	gun1_3h	WT_3h
AT5G61560	Plant U-box type E3 ubiquitin ligase (PUB).	NA	A3	AT5G61560_P5	AT5G61560_s1	gun1_3h	WT_3h
AT5G61560	Plant U-box type E3 ubiquitin ligase (PUB).	NA	IR	AT5G61560_P5	AT5G61560_s1	gun1_3h	WT_3h
AT5G61910	DCD (Development and Cell Death) domain protein;(source:Araport11)	NA	A3	AT5G61910_JC11	AT5G61910_s1	gun1_3h	WT_3h
AT5G61910	DCD (Development and Cell Death) domain protein;(source:Araport11)	NA	A5	AT5G61910_JC11	AT5G61910_s1	gun1_3h	WT_3h
AT5G61910	DCD (Development and Cell Death) domain protein;(source:Araport11)	NA	IR	AT5G61910_JC11	AT5G61910_s1	gun1_3h	WT_3h
AT5G61920	FLX-like protein;(source:Araport11)	FLL4,FLX4	ES	AT5G61920_P6	AT5G61920_ID1	gun1_3h	WT_3h
AT5G61920	FLX-like protein;(source:Araport11)	FLL4,FLX4	IR	AT5G61920_P6	AT5G61920_ID1	gun1_3h	WT_3h
AT5G61920	FLX-like protein;(source:Araport11)	FLL4,FLX4	A5	AT5G61920_P2	AT5G61920_P5	gun1_3h	WT_3h
AT5G61920	FLX-like protein;(source:Araport11)	FLL4,FLX4	A5	AT5G61920_P6	AT5G61920_P5	gun1_3h	WT_3h
AT5G61920	FLX-like protein;(source:Araport11)	FLL4,FLX4	ES	AT5G61920_P2	AT5G61920_P5	gun1_3h	WT_3h
AT5G61920	FLX-like protein;(source:Araport11)	FLL4,FLX4	IR	AT5G61920_P6	AT5G61920_P5	gun1_3h	WT_3h
AT5G61920	FLX-like protein;(source:Araport11)	FLL4,FLX4	IR	AT5G61920_P2	AT5G61920_P5	gun1_3h	WT_3h
AT5G62460	RZFP is a zinc finger protein involved in mediating abiotic stress tolerance.	RZFP	IR	AT5G62460_P1	AT5G62460_P2	gun1_3h	WT_3h
AT5G63160	BTB and TAZ domain protein. Short-lived nuclear-cytoplasmic protein targeted for degradation by the 26S proteosome pathway. Acts redundantly with BT2 and BT3 during female gametophyte development.	BT1	A3	AT5G63160_P1	AT5G63160_P2	gun1_3h	WT_3h
AT5G63160	BTB and TAZ domain protein. Short-lived nuclear-cytoplasmic protein targeted for degradation by the 26S proteosome pathway. Acts redundantly with BT2 and BT3 during female gametophyte development.	BT1	IR	AT5G63160_P1	AT5G63160_P2	gun1_3h	WT_3h
AT5G64200	encodes an SC35-like splicing factor of 35 kD localized to the nuclear specks.	At-SC35,ATSC35,SC35	IR	AT5G64200.1	AT5G64200.2	gun1_3h	WT_3h
AT5G64240	Encodes a type I metacaspase. Two Arabidopsis metacaspases, AT1G02170 (MC1) and AT4G25110 (MC2) antagonistically control programmed cell death in Arabidopsis. MC1 is a positive regulator of cell death and requires conserved caspase-like putative catalytic residues for its function. MC2 negatively regulates cell death. This function is independent of the putative catalytic residues. A third type I…	AtMC3,AtMCP1a,MC3,MCP1a	IR	AT5G64240.2	AT5G64240_ID2	gun1_3h	WT_3h
AT5G65240	Leucine-rich repeat protein kinase family protein;(source:Araport11)	NA	A3	AT5G65240_P1	AT5G65240_ID6	gun1_3h	WT_3h
AT5G65240	Leucine-rich repeat protein kinase family protein;(source:Araport11)	NA	IR	AT5G65240_P1	AT5G65240_ID9	gun1_3h	WT_3h
AT5G65240	Leucine-rich repeat protein kinase family protein;(source:Araport11)	NA	IR	AT5G65240_P1	AT5G65240_P2	gun1_3h	WT_3h
AT5G65290	LMBR1-like membrane protein;(source:Araport11)	NA	A5	AT5G65290_JS1	AT5G65290_P1	gun1_3h	WT_3h
AT5G65310	Encodes a class I HDZip (homeodomain-leucine zipper) protein that is a positive regulator of ABA-responsiveness, mediating the inhibitory effect of ABA on growth during seedling establishment.	ATHB-5,ATHB5,HB5	A3	AT5G65310_P1	AT5G65310_c1	gun1_3h	WT_3h
AT5G65540	transcription initiation factor TFIID subunit;(source:Araport11)	NA	IR	AT5G65540_ID2	AT5G65540.1	gun1_3h	WT_3h
AT5G65685	SS5 is a chloroplast-localized protein that is related to the canonical starch synthases (most closely to SS4), but is catalytically inactive. Arabidopsis ss5 mutants have near-normal total transitory starch contents, but produce fewer and larger starch granules in their chloroplast. SS5 can bind to starch in vitro, and interacts with MRC/PII1 in vivo.	NA	A5	AT5G65685_ID9	AT5G65685_ID26	gun1_3h	WT_3h
AT5G65685	SS5 is a chloroplast-localized protein that is related to the canonical starch synthases (most closely to SS4), but is catalytically inactive. Arabidopsis ss5 mutants have near-normal total transitory starch contents, but produce fewer and larger starch granules in their chloroplast. SS5 can bind to starch in vitro, and interacts with MRC/PII1 in vivo.	NA	IR	AT5G65685_ID9	AT5G65685_ID26	gun1_3h	WT_3h
AT5G66190	Encodes a leaf-type ferredoxin:NADP(H) oxidoreductase. It is present in both chloroplast stroma and thylakoid membranes but is more abundant in the thylakoid. The affinity of this enzyme for ferredoxin is slightly, but significantly, higher than AtLFNR2, an isoform of the same enzyme. AtLFNR1 forms a heterodimer with AtFNR2 and is also a prerequisite to attach AtFNR2 to the thylakoid membrane.	ATLFNR1,FNR1,LFNR1	A5	AT5G66190.1	AT5G66190_ID15	gun1_3h	WT_3h
AT5G66250	kinectin-like protein;(source:Araport11)	NA	IR	AT5G66250_ID1	AT5G66250_P2	gun1_3h	WT_3h
AT5G66675	transmembrane protein, putative (DUF677);(source:Araport11)	NA	IR	AT5G66675_ID1	AT5G66675_P1	gun1_3h	WT_3h
AT5G67385	Encodes a phototropin-interacting NRL protein that is an early signaling component in the phototrophic response and is essential for the phototropin-mediated chloroplast accumulation response but is not involved in the chloroplast avoidance response or stomatal opening.	NCH1	A5	AT5G67385_P1	AT5G67385_P2	gun1_3h	WT_3h
AT5G67540	Arabinanase/levansucrase/invertase;(source:Araport11)	NA	A3	AT5G67540_s1	AT5G67540_P1	gun1_3h	WT_3h
AT5G67540	Arabinanase/levansucrase/invertase;(source:Araport11)	NA	IR	AT5G67540_s1	AT5G67540_P1	gun1_3h	WT_3h
AT5G67630	P-loop containing nucleoside triphosphate hydrolases superfamily protein;(source:Araport11)	NA	IR	AT5G67630_P1	AT5G67630_ID1	gun1_3h	WT_3h

## Sheet: WT_24h_vs_gun1_24h
GeneID	Description	Aliases	Mechanism	Isoform1	Isoform2	Time1	Time2
AT1G05385	Encodes a Psb27 homolog involved in photosystem II biogenesis.	LPA19,Psb27-H1	IR	AT1G05385_P2	AT1G05385_ID2	gun1_24h	WT_24h
AT1G07720	Encodes KCS3, a member of the 3-ketoacyl-CoA synthase family involved in the biosynthesis of VLCFA (very long chain fatty acids).	KCS3	IR	AT1G07720_JC2	AT1G07720_P2	gun1_24h	WT_24h
AT1G09995	DNA repair DEAD helicase RAD3/XP-D subfamily protein;(source:Araport11)	NA	A3	AT1G09995_P1	AT1G09995_P2	gun1_24h	WT_24h
AT1G09995	DNA repair DEAD helicase RAD3/XP-D subfamily protein;(source:Araport11)	NA	IR	AT1G09995_P1	AT1G09995_P2	gun1_24h	WT_24h
AT1G09995	DNA repair DEAD helicase RAD3/XP-D subfamily protein;(source:Araport11)	NA	A3	AT1G09995_P1	AT1G09995_P3	gun1_24h	WT_24h
AT1G09995	DNA repair DEAD helicase RAD3/XP-D subfamily protein;(source:Araport11)	NA	IR	AT1G09995_P1	AT1G09995_P3	gun1_24h	WT_24h
AT1G13880	ELM2 domain-containing protein;(source:Araport11)	ELM2	A5	AT1G13880_ID1	AT1G13880_c1	gun1_24h	WT_24h
AT1G13880	ELM2 domain-containing protein;(source:Araport11)	ELM2	A3	AT1G13880_ID1	AT1G13880_P1	gun1_24h	WT_24h
AT1G13880	ELM2 domain-containing protein;(source:Araport11)	ELM2	A3	AT1G13880_ID1	AT1G13880_c1	gun1_24h	WT_24h
AT1G14520	Encodes MIOX1. Belongs to myo-inositol oxygenase gene family.	MIOX1	IR	AT1G14520_P4	AT1G14520_P1	gun1_24h	WT_24h
AT1G14520	Encodes MIOX1. Belongs to myo-inositol oxygenase gene family.	MIOX1	IR	AT1G14520_P4	AT1G14520_P3	gun1_24h	WT_24h
AT1G18190	This gene is predicted to encode a protein that functions as a Golgi apparatus structural component known as a golgin in mammals and yeast. A fluorescently-tagged version of GC2 co-localizes with Golgi markers, and this localization appears to be replicated using the C-terminal (508?668 aa) portion of the protein.	GC2	IR	AT1G18190_ID7	AT1G18190_P1	gun1_24h	WT_24h
AT1G18320	Mitochondrial import inner membrane translocase subunit Tim17/Tim22/Tim23 family protein;(source:Araport11)	NA	IR	AT1G18320_ID3	AT1G18320.1	gun1_24h	WT_24h
AT1G18320	Mitochondrial import inner membrane translocase subunit Tim17/Tim22/Tim23 family protein;(source:Araport11)	NA	IR	AT1G18320_ID1	AT1G18320.1	gun1_24h	WT_24h
AT1G19025	DNA repair metallo-beta-lactamase family protein;(source:Araport11)	NA	A3	AT1G19025_P1	AT1G19025_P3	gun1_24h	WT_24h
AT1G19025	DNA repair metallo-beta-lactamase family protein;(source:Araport11)	NA	A3	AT1G19025_P1	AT1G19025_JC1	gun1_24h	WT_24h
AT1G19690	NAD(P)-binding Rossmann-fold superfamily protein;(source:Araport11)	NA	A3	AT1G19690_ID5	AT1G19690_c1	gun1_24h	WT_24h
AT1G19690	NAD(P)-binding Rossmann-fold superfamily protein;(source:Araport11)	NA	A3	AT1G19690_ID14	AT1G19690_c1	gun1_24h	WT_24h
AT1G19690	NAD(P)-binding Rossmann-fold superfamily protein;(source:Araport11)	NA	IR	AT1G19690_ID14	AT1G19690_c1	gun1_24h	WT_24h
AT1G19690	NAD(P)-binding Rossmann-fold superfamily protein;(source:Araport11)	NA	IR	AT1G19690_ID5	AT1G19690_c1	gun1_24h	WT_24h
AT1G19690	NAD(P)-binding Rossmann-fold superfamily protein;(source:Araport11)	NA	IR	AT1G19690_ID1	AT1G19690_c1	gun1_24h	WT_24h
AT1G20220	Alba DNA/RNA-binding protein;(source:Araport11)	NA	ES	AT1G20220_ID68	AT1G20220_ID138	gun1_24h	WT_24h
AT1G20270	2-oxoglutarate-dependent dioxygenase	NA	IR	AT1G20270_P2	AT1G20270_P1	gun1_24h	WT_24h
AT1G20540	Transducin/WD40 repeat-like superfamily protein;(source:Araport11)	NA	A5	AT1G20540_ID16	AT1G20540_s2	gun1_24h	WT_24h
AT1G26180	membrane protein;(source:Araport11)	NA	A3	AT1G26180_ID2	AT1G26180.1	gun1_24h	WT_24h
AT1G26230	Encodes a subunit of chloroplasts chaperonins that are involved in mediating the folding of newly synthesized, translocated, or stress-denatured proteins. Cpn60 subunits are: Cpn60alpha1 (At2g28000), AtCpn60alpha2 (At5g18820), AtCpn60beta1 (At1g55490), AtCpn60beta2 (At3g13470), AtCpn60beta3 (At5g56500), AtCpn60beta4 (At1g26230).	Cpn60beta4,CPNB4	A3	AT1G26230_JC7	AT1G26230.2	gun1_24h	WT_24h
AT1G26230	Encodes a subunit of chloroplasts chaperonins that are involved in mediating the folding of newly synthesized, translocated, or stress-denatured proteins. Cpn60 subunits are: Cpn60alpha1 (At2g28000), AtCpn60alpha2 (At5g18820), AtCpn60beta1 (At1g55490), AtCpn60beta2 (At3g13470), AtCpn60beta3 (At5g56500), AtCpn60beta4 (At1g26230).	Cpn60beta4,CPNB4	A5	AT1G26230_JC7	AT1G26230.2	gun1_24h	WT_24h
AT1G26230	Encodes a subunit of chloroplasts chaperonins that are involved in mediating the folding of newly synthesized, translocated, or stress-denatured proteins. Cpn60 subunits are: Cpn60alpha1 (At2g28000), AtCpn60alpha2 (At5g18820), AtCpn60beta1 (At1g55490), AtCpn60beta2 (At3g13470), AtCpn60beta3 (At5g56500), AtCpn60beta4 (At1g26230).	Cpn60beta4,CPNB4	IR	AT1G26230_JC7	AT1G26230.2	gun1_24h	WT_24h
AT1G28090	Polynucleotide adenylyltransferase family protein;(source:Araport11)	NA	A3	AT1G28090_c3	AT1G28090_P1	gun1_24h	WT_24h
AT1G29750	Receptor-like serine/threonine kinase (RKF1). The putative extracellular domain of the RKF1 protein contains 13 tandem repeats of leucine-rich sequences. Expressed in early flower primordial, stamen, and pollen grains.	RKF1	A3	AT1G29750_JC12	AT1G29750_P2	gun1_24h	WT_24h
AT1G29960	Peptidase S24/S26A/S26B/S26C family protein;(source:Araport11)	NA	A3	AT1G29960_c1	AT1G29960_P1	gun1_24h	WT_24h
AT1G29960	Peptidase S24/S26A/S26B/S26C family protein;(source:Araport11)	NA	A5	AT1G29960_JC3	AT1G29960_P1	gun1_24h	WT_24h
AT1G29960	Peptidase S24/S26A/S26B/S26C family protein;(source:Araport11)	NA	A5	AT1G29960_c1	AT1G29960_P1	gun1_24h	WT_24h
AT1G32940	Subtilase family protein;(source:Araport11)	AtSBT3.5,SBT3.5	IR	AT1G32940_P4	AT1G32940_P1	gun1_24h	WT_24h
AT1G34550	transmembrane protein (DUF616);(source:Araport11)	EMB2756	IR	AT1G34550_P2	AT1G34550.1	gun1_24h	WT_24h
AT1G34570	Essential protein Yae1, N-terminal;(source:Araport11)	NA	A5	AT1G34570_JS2	AT1G34570_P1	gun1_24h	WT_24h
AT1G34570	Essential protein Yae1, N-terminal;(source:Araport11)	NA	IR	AT1G34570_ID10	AT1G34570_P1	gun1_24h	WT_24h
AT1G43980	Tetratricopeptide repeat (TPR)-like superfamily protein;(source:Araport11)	NA	IR	AT1G43980_P1	AT1G43980_s1	gun1_24h	WT_24h
AT1G44910	Binds the carboxyl-terminal domain (CTD) of the largest subunit of RNA polymerase II and functions as a scaffold for RNA processing machineries.	ATPRP40A,PRP40A	IR	AT1G44910_ID4	AT1G44910_ID2	gun1_24h	WT_24h
AT1G44910	Binds the carboxyl-terminal domain (CTD) of the largest subunit of RNA polymerase II and functions as a scaffold for RNA processing machineries.	ATPRP40A,PRP40A	IR	AT1G44910_ID4	AT1G44910_ID5	gun1_24h	WT_24h
AT1G48550	VPS26C is a component of a retromer complex, it is involved in endosome to lysosome protein transport and root hair growth.	VPS26C	A3	AT1G48550_ID6	AT1G48550_ID4	gun1_24h	WT_24h
AT1G48550	VPS26C is a component of a retromer complex, it is involved in endosome to lysosome protein transport and root hair growth.	VPS26C	IR	AT1G48550_ID6	AT1G48550_ID4	gun1_24h	WT_24h
AT1G48550	VPS26C is a component of a retromer complex, it is involved in endosome to lysosome protein transport and root hair growth.	VPS26C	IR	AT1G48550_c2	AT1G48550_ID4	gun1_24h	WT_24h
AT1G49730	Protein kinase superfamily protein;(source:Araport11)	NA	A3	AT1G49730_c1	AT1G49730_ID27	gun1_24h	WT_24h
AT1G49730	Protein kinase superfamily protein;(source:Araport11)	NA	A3	AT1G49730.1	AT1G49730_ID27	gun1_24h	WT_24h
AT1G49730	Protein kinase superfamily protein;(source:Araport11)	NA	IR	AT1G49730_c1	AT1G49730_ID27	gun1_24h	WT_24h
AT1G50140	P-loop containing nucleoside triphosphate hydrolases superfamily protein;(source:Araport11)	NA	IR	AT1G50140_s4	AT1G50140_c3	gun1_24h	WT_24h
AT1G52370	Ribosomal protein L22p/L17e family protein;(source:Araport11)	NA	A5	AT1G52370_P3	AT1G52370_P1	gun1_24h	WT_24h
AT1G52370	Ribosomal protein L22p/L17e family protein;(source:Araport11)	NA	IR	AT1G52370_P3	AT1G52370_P1	gun1_24h	WT_24h
AT1G53380	hypothetical protein (DUF641);(source:Araport11)	NA	ES	AT1G53380_c1	AT1G53380_P1	gun1_24h	WT_24h
AT1G55810	One of the homologous genes predicted to encode proteins with UPRT domains (Uracil phosphoribosyltransferase). Five of these genes (At5g40870, At3g27190, At1g55810, At4g26510 and At3g27440) show a high level of identity, and are annotated as also containing a N-terminal uracil kinase (UK) domain. These genes are referred to as UKL1 (UK-like 1), UKL2, UKL3, UKL4 and UKL5, respectively.	UKL3	A5	AT1G55810_P3	AT1G55810_P1	gun1_24h	WT_24h
AT1G56540	Disease resistance protein (TIR-NBS-LRR class) family;(source:Araport11)	NA	IR	AT1G56540_P2	AT1G56540_P1	gun1_24h	WT_24h
AT1G57600	MBOAT (membrane bound O-acyl transferase) family protein;(source:Araport11)	NA	A3	AT1G57600_JS10	AT1G57600_P1	gun1_24h	WT_24h
AT1G57600	MBOAT (membrane bound O-acyl transferase) family protein;(source:Araport11)	NA	IR	AT1G57600_JS10	AT1G57600_P1	gun1_24h	WT_24h
AT1G59600	ZCW7;(source:Araport11)	ZCW7	IR	AT1G59600_s2	AT1G59600_s1	gun1_24h	WT_24h
AT1G59600	ZCW7;(source:Araport11)	ZCW7	A3	AT1G59600_s2	AT1G59600_s1	gun1_24h	WT_24h
AT1G61170	hypothetical protein;(source:Araport11)	NA	IR	AT1G61170_ID1	AT1G61170_P1	gun1_24h	WT_24h
AT1G67210	Proline-rich spliceosome-associated (PSP) family protein / zinc knuckle (CCHC-type) family protein;(source:Araport11)	NA	A3	AT1G67210.2	AT1G67210_P1	gun1_24h	WT_24h
AT1G67210	Proline-rich spliceosome-associated (PSP) family protein / zinc knuckle (CCHC-type) family protein;(source:Araport11)	NA	IR	AT1G67210.2	AT1G67210_P3	gun1_24h	WT_24h
AT1G67210	Proline-rich spliceosome-associated (PSP) family protein / zinc knuckle (CCHC-type) family protein;(source:Araport11)	NA	A3	AT1G67210.2	AT1G67210_P3	gun1_24h	WT_24h
AT1G67690	Zincin-like metalloproteases family protein;(source:Araport11)	PSPM3	A3	AT1G67690_c1	AT1G67690_P1	gun1_24h	WT_24h
AT1G69310	Encodes WRKY57, a member of the WRKY Transcription Factor. Activation of WRKY57 confers drought tolerance.	ATWRKY57,WRKY57	IR	AT1G69310_JS3	AT1G69310_P2	gun1_24h	WT_24h
AT1G69310	Encodes WRKY57, a member of the WRKY Transcription Factor. Activation of WRKY57 confers drought tolerance.	ATWRKY57,WRKY57	IR	AT1G69310_P1	AT1G69310_P2	gun1_24h	WT_24h
AT1G70730	Encodes a cytosolic phosphoglucomutase (PGM). Two Arabidopsis PGM proteins (AT1G70730/PGM2 and AT1G23190/PGM3) have high sequence similarities and redundant functions. Mature plants possessing a single cPGM allele had a major reduction in cPGM activity. Whereas pgm2 and pgm3 single mutants are undistinguishable from the wild type, loss of both PGM2 and PGM3 severely impairs male and female gameto…	PGM2	A3	AT1G70730_P3	AT1G70730.2	gun1_24h	WT_24h
AT1G71528	Natural antisense transcript overlaps with AT1G71530;(source:Araport11)	NA	A3	AT1G71528_JS1	AT1G71528.1	gun1_24h	WT_24h
AT1G71720	Encodes a chloroplast localized protein that regulates the translation of Ycf1 by binding to its mRNA. It is involved in the biogenesis of photosynthetic complexes.	PBR1,PDE338,RLSB	A5	AT1G71720_P1	AT1G71720_ID18	gun1_24h	WT_24h
AT1G71720	Encodes a chloroplast localized protein that regulates the translation of Ycf1 by binding to its mRNA. It is involved in the biogenesis of photosynthetic complexes.	PBR1,PDE338,RLSB	IR	AT1G71720_P1	AT1G71720_ID18	gun1_24h	WT_24h
AT1G71720	Encodes a chloroplast localized protein that regulates the translation of Ycf1 by binding to its mRNA. It is involved in the biogenesis of photosynthetic complexes.	PBR1,PDE338,RLSB	IR	AT1G71720_P1	AT1G71720_ID7	gun1_24h	WT_24h
AT1G72990	beta-galactosidase 17;(source:Araport11)	BGAL17	IR	AT1G72990_P1	AT1G72990_ID2	gun1_24h	WT_24h
AT1G72990	beta-galactosidase 17;(source:Araport11)	BGAL17	A3	AT1G72990_P1	AT1G72990_JC5	gun1_24h	WT_24h
AT1G72990	beta-galactosidase 17;(source:Araport11)	BGAL17	A3	AT1G72990_P1	AT1G72990_P2	gun1_24h	WT_24h
AT1G72990	beta-galactosidase 17;(source:Araport11)	BGAL17	IR	AT1G72990_P1	AT1G72990_s3	gun1_24h	WT_24h
AT1G76040	member of Calcium Dependent Protein Kinase	CPK29	IR	AT1G76040_P1	AT1G76040_ID2	gun1_24h	WT_24h
AT1G76730	Encodes a paralog of ATP-dependent folate salvage enzyme 5-formyltetrahydrofolate cycloligase (5-FCL) that is targeted to chloroplasts and to be required for embryo viability and lacks 5-FCL activity.	COG0212	IR	AT1G76730_ID10	AT1G76730_P1	gun1_24h	WT_24h
AT1G77260	S-adenosyl-L-methionine-dependent methyltransferases superfamily protein;(source:Araport11)	NA	A3	AT1G77260_ID3	AT1G77260_P1	gun1_24h	WT_24h
AT1G78690	Encodes a lysoglycerophospholipid O-acyltransferase that acylates 1-acyl lyso PE and 1-acyl lyso PG but not PE or PG.	At1g78690p	A3	AT1G78690_ID42	AT1G78690_P3	gun1_24h	WT_24h
AT1G78690	Encodes a lysoglycerophospholipid O-acyltransferase that acylates 1-acyl lyso PE and 1-acyl lyso PG but not PE or PG.	At1g78690p	A5	AT1G78690_ID42	AT1G78690_P3	gun1_24h	WT_24h
AT1G78690	Encodes a lysoglycerophospholipid O-acyltransferase that acylates 1-acyl lyso PE and 1-acyl lyso PG but not PE or PG.	At1g78690p	IR	AT1G78690_ID42	AT1G78690_P3	gun1_24h	WT_24h
AT1G79450	ALA-interacting subunit 5;(source:Araport11)	ALIS5	IR	AT1G79450.2	AT1G79450_P1	gun1_24h	WT_24h
AT1G79700	WRI4 encodes an AP2/ERF-type transcriptional activator that specifically controls cuticular wax biosynthesis in Arabidopsis stems. It also functions to activate transcription of genes involved fatty acid biosynthesis during seed and flower development as well as stem wax biosynthesis. Targets identified by ChIP-seq include: LACS1, KCR1, PAS2, ECR, and WSD1.	WRI4	ES	AT1G79700_ID13	AT1G79700_P4	gun1_24h	WT_24h
AT1G79700	WRI4 encodes an AP2/ERF-type transcriptional activator that specifically controls cuticular wax biosynthesis in Arabidopsis stems. It also functions to activate transcription of genes involved fatty acid biosynthesis during seed and flower development as well as stem wax biosynthesis. Targets identified by ChIP-seq include: LACS1, KCR1, PAS2, ECR, and WSD1.	WRI4	IR	AT1G79700_ID13	AT1G79700_P4	gun1_24h	WT_24h
AT2G01140	Aldolase superfamily protein;(source:Araport11)	AtFBA3,FBA3,PDE345	A5	AT2G01140_ID4	AT2G01140.1	gun1_24h	WT_24h
AT2G01140	Aldolase superfamily protein;(source:Araport11)	AtFBA3,FBA3,PDE345	A3	AT2G01140_ID4	AT2G01140.1	gun1_24h	WT_24h
AT2G01730	a homolog of cleavage and polyadenylation specificity factor that plays an essential role in the development of female gametophyte and embryo	ATCPSF73-II,CPSF73-II,EDA26	A5	AT2G01730_P1	AT2G01730_JS4	gun1_24h	WT_24h
AT2G01730	a homolog of cleavage and polyadenylation specificity factor that plays an essential role in the development of female gametophyte and embryo	ATCPSF73-II,CPSF73-II,EDA26	IR	AT2G01730_P1	AT2G01730_P2	gun1_24h	WT_24h
AT2G03060	Encodes a member of the MIKC (MADS box, Keratin binding domain, and C terminal domain containing )family of transcriptional regulators. AGL30 is expressed in pollen.It forms heterodimers with other MICK family members.	AGL30	IR	AT2G03060_P3	AT2G03060_P6	gun1_24h	WT_24h
AT2G03667	Asparagine synthase family protein;(source:Araport11)	NA	IR	AT2G03667_ID3	AT2G03667_ID2	gun1_24h	WT_24h
AT2G03667	Asparagine synthase family protein;(source:Araport11)	NA	IR	AT2G03667_P1	AT2G03667_ID2	gun1_24h	WT_24h
AT2G03667	Asparagine synthase family protein;(source:Araport11)	NA	A3	AT2G03667_P1	AT2G03667_ID4	gun1_24h	WT_24h
AT2G03667	Asparagine synthase family protein;(source:Araport11)	NA	A3	AT2G03667_ID3	AT2G03667_ID2	gun1_24h	WT_24h
AT2G03667	Asparagine synthase family protein;(source:Araport11)	NA	IR	AT2G03667_ID3	AT2G03667_ID4	gun1_24h	WT_24h
AT2G03667	Asparagine synthase family protein;(source:Araport11)	NA	A3	AT2G03667_ID3	AT2G03667_P2	gun1_24h	WT_24h
AT2G03667	Asparagine synthase family protein;(source:Araport11)	NA	IR	AT2G03667_ID3	AT2G03667_P2	gun1_24h	WT_24h
AT2G03667	Asparagine synthase family protein;(source:Araport11)	NA	IR	AT2G03667_P1	AT2G03667_ID4	gun1_24h	WT_24h
AT2G03667	Asparagine synthase family protein;(source:Araport11)	NA	IR	AT2G03667_P1	AT2G03667_P2	gun1_24h	WT_24h
AT2G14285	Small nuclear ribonucleoprotein family protein;(source:Araport11)	NA	A3	AT2G14285.1	AT2G14285_s2	gun1_24h	WT_24h
AT2G14285	Small nuclear ribonucleoprotein family protein;(source:Araport11)	NA	ES	AT2G14285.1	AT2G14285_s2	gun1_24h	WT_24h
AT2G14285	Small nuclear ribonucleoprotein family protein;(source:Araport11)	NA	MES	AT2G14285.1	AT2G14285_s2	gun1_24h	WT_24h
AT2G20210	RNI-like superfamily protein;(source:Araport11)	NA	A3	AT2G20210_ID58	AT2G20210_ID22	gun1_24h	WT_24h
AT2G21710	Mitochondrial transcription termination factor family protein;(source:Araport11)	EMB2219	IR	AT2G21710_P1	AT2G21710_ID19	gun1_24h	WT_24h
AT2G23330	transposable_element_gene;(source:Araport11);copia-like retrotransposon family, has a 3.9e-195 P-value blast match to GB:AAA57005 Hopscotch polyprotein (Ty1_Copia-element) (Zea mays);(source:TAIR10)	NA	IR	AT2G23330_c1	AT2G23330.1	gun1_24h	WT_24h
AT2G25510	transmembrane protein;(source:Araport11)	NA	A3	AT2G25510_P1	AT2G25510_P2	gun1_24h	WT_24h
AT2G27000	member of CYP705A	CYP705A8	A3	AT2G27000_P1	AT2G27000_s1	gun1_24h	WT_24h
AT2G27760	Encodes tRNA isopentenyltransferase, similar to yeast MOD5.	ATIPT2,IPPT,IPT2	A3	AT2G27760_ID9	AT2G27760_ID6	gun1_24h	WT_24h
AT2G27760	Encodes tRNA isopentenyltransferase, similar to yeast MOD5.	ATIPT2,IPPT,IPT2	IR	AT2G27760_P1	AT2G27760_ID6	gun1_24h	WT_24h
AT2G27760	Encodes tRNA isopentenyltransferase, similar to yeast MOD5.	ATIPT2,IPPT,IPT2	A3	AT2G27760_P1	AT2G27760_ID6	gun1_24h	WT_24h
AT2G28310	trimethylguanosine synthase (DUF707);(source:Araport11)	NA	A3	AT2G28310_ID66	AT2G28310_ID104	gun1_24h	WT_24h
AT2G28310	trimethylguanosine synthase (DUF707);(source:Araport11)	NA	IR	AT2G28310_ID66	AT2G28310_ID104	gun1_24h	WT_24h
AT2G28360	SIT4 phosphatase-associated family protein;(source:Araport11)	NA	A3	AT2G28360_JC2	AT2G28360_P1	gun1_24h	WT_24h
AT2G28940	Protein kinase superfamily protein;(source:Araport11)	NA	A3	AT2G28940_ID3	AT2G28940_ID5	gun1_24h	WT_24h
AT2G28940	Protein kinase superfamily protein;(source:Araport11)	NA	A3	AT2G28940_P2	AT2G28940_ID5	gun1_24h	WT_24h
AT2G28940	Protein kinase superfamily protein;(source:Araport11)	NA	IR	AT2G28940_ID3	AT2G28940_ID5	gun1_24h	WT_24h
AT2G28940	Protein kinase superfamily protein;(source:Araport11)	NA	IR	AT2G28940_P2	AT2G28940_ID5	gun1_24h	WT_24h
AT2G28940	Protein kinase superfamily protein;(source:Araport11)	NA	IR	AT2G28940.1	AT2G28940_ID5	gun1_24h	WT_24h
AT2G29140	Encodes a member of the Arabidopsis Pumilio (APUM) proteins containing PUF domain (eight repeats of approximately 36 amino acids each). PUF proteins regulate both mRNA stability and translation through sequence-specific binding to the 3' UTR of target mRNA transcripts. The mRNA is cell-to-cell mobile.	APUM3,PUM3	IR	AT2G29140_s3	AT2G29140_P2	gun1_24h	WT_24h
AT2G31580	ICA1 is a nuclear localized member of the tRNA(His) guanylyl transferase superfamily. Loss of function alleles show increased sensitivity to growth at high temperatures defects in cell cycle progression and DNA repair.	ICA1	A3	AT2G31580_P2	AT2G31580_JS4	gun1_24h	WT_24h
AT2G31580	ICA1 is a nuclear localized member of the tRNA(His) guanylyl transferase superfamily. Loss of function alleles show increased sensitivity to growth at high temperatures defects in cell cycle progression and DNA repair.	ICA1	IR	AT2G31580_P2	AT2G31580_JS4	gun1_24h	WT_24h
AT2G31955	COFACTOR OF NITRATE REDUCTASE AND XANTHINE DEHYDROGENASE 2. Encodes a protein involved in molybdenum cofactor biosynthesis. Homologous to E.coli moaA. Expression is abundant in all tissues examined, particularly in roots. Appears to have targeting signals for chloroplast or mitochondria.	CNX2	IR	AT2G31955_ID48	AT2G31955_ID45	gun1_24h	WT_24h
AT2G31955	COFACTOR OF NITRATE REDUCTASE AND XANTHINE DEHYDROGENASE 2. Encodes a protein involved in molybdenum cofactor biosynthesis. Homologous to E.coli moaA. Expression is abundant in all tissues examined, particularly in roots. Appears to have targeting signals for chloroplast or mitochondria.	CNX2	A5	AT2G31955_ID48	AT2G31955_ID45	gun1_24h	WT_24h
AT2G36630	Sulfite exporter TauE/SafE family protein;(source:Araport11)	NA	IR	AT2G36630_ID4	AT2G36630_P1	gun1_24h	WT_24h
AT2G38020	necessary for proper vacuole formation and morphogenesis in Arabidopsis	EMB258,MAN,VCL1,VPS16	A3	AT2G38020.2	AT2G38020_ID2	gun1_24h	WT_24h
AT2G38020	necessary for proper vacuole formation and morphogenesis in Arabidopsis	EMB258,MAN,VCL1,VPS16	IR	AT2G38020.2	AT2G38020_ID2	gun1_24h	WT_24h
AT2G39440	ribonuclease H2 subunit C-like protein;(source:Araport11)	NA	A3	AT2G39440_ID1	AT2G39440_P1	gun1_24h	WT_24h
AT2G39910	ARM repeat superfamily protein;(source:Araport11)	NA	A5	AT2G39910_ID10	AT2G39910.1	gun1_24h	WT_24h
AT2G39910	ARM repeat superfamily protein;(source:Araport11)	NA	IR	AT2G39910_ID10	AT2G39910.1	gun1_24h	WT_24h
AT2G40090	member of ATH subfamily	ATATH9,ATH9	IR	AT2G40090_s3	AT2G40090_c2	gun1_24h	WT_24h
AT2G40090	member of ATH subfamily	ATATH9,ATH9	A3	AT2G40090_s3	AT2G40090_c2	gun1_24h	WT_24h
AT2G40160	Encodes a member of the TBL (TRICHOME BIREFRINGENCE-LIKE) gene family containing a plant-specific DUF231 (domain of unknown function) domain. TBL gene family has 46 members, two of which (TBR/AT5G06700 and TBL3/AT5G01360) have been shown to be involved in the synthesis and deposition of secondary wall cellulose, presumably by influencing the esterification state of pectic polymers. A nomenclature…	TBL30	IR	AT2G40160.2	AT2G40160_ID14	gun1_24h	WT_24h
AT2G40160	Encodes a member of the TBL (TRICHOME BIREFRINGENCE-LIKE) gene family containing a plant-specific DUF231 (domain of unknown function) domain. TBL gene family has 46 members, two of which (TBR/AT5G06700 and TBL3/AT5G01360) have been shown to be involved in the synthesis and deposition of secondary wall cellulose, presumably by influencing the esterification state of pectic polymers. A nomenclature…	TBL30	IR	AT2G40160.2	AT2G40160_ID8	gun1_24h	WT_24h
AT2G40160	Encodes a member of the TBL (TRICHOME BIREFRINGENCE-LIKE) gene family containing a plant-specific DUF231 (domain of unknown function) domain. TBL gene family has 46 members, two of which (TBR/AT5G06700 and TBL3/AT5G01360) have been shown to be involved in the synthesis and deposition of secondary wall cellulose, presumably by influencing the esterification state of pectic polymers. A nomenclature…	TBL30	IR	AT2G40160.2	AT2G40160_P1	gun1_24h	WT_24h
AT2G40640	Plant U-box type E3 ubiquitin ligase (PUB).	NA	IR	AT2G40640.1	AT2G40640_ID7	gun1_24h	WT_24h
AT2G40640	Plant U-box type E3 ubiquitin ligase (PUB).	NA	A5	AT2G40640.1	AT2G40640_ID4	gun1_24h	WT_24h
AT2G43240	Nucleotide-sugar transporter family protein;(source:Araport11)	NA	IR	AT2G43240_ID1	AT2G43240_P1	gun1_24h	WT_24h
AT2G43490	Ypt/Rab-GAP domain of gyp1p superfamily protein;(source:Araport11)	NA	A3	AT2G43490.6	AT2G43490_P8	gun1_24h	WT_24h
AT2G44750	Encodes a thiamine pyrophosphokinase capable of producing thiamine pyrophosphate from free thiamine.	TPK2	A3	AT2G44750.1	AT2G44750_ID16	gun1_24h	WT_24h
AT2G44750	Encodes a thiamine pyrophosphokinase capable of producing thiamine pyrophosphate from free thiamine.	TPK2	A3	AT2G44750.1	AT2G44750_ID20	gun1_24h	WT_24h
AT2G44750	Encodes a thiamine pyrophosphokinase capable of producing thiamine pyrophosphate from free thiamine.	TPK2	IR	AT2G44750.1	AT2G44750_ID20	gun1_24h	WT_24h
AT2G44750	Encodes a thiamine pyrophosphokinase capable of producing thiamine pyrophosphate from free thiamine.	TPK2	A3	AT2G44750.1	AT2G44750.2	gun1_24h	WT_24h
AT2G44850	hypothetical protein;(source:Araport11)	NA	A3	AT2G44850_P3	AT2G44850_ID2	gun1_24h	WT_24h
AT2G44850	hypothetical protein;(source:Araport11)	NA	A5	AT2G44850_P3	AT2G44850_ID2	gun1_24h	WT_24h
AT2G44850	hypothetical protein;(source:Araport11)	NA	ES	AT2G44850.1	AT2G44850_ID2	gun1_24h	WT_24h
AT2G44850	hypothetical protein;(source:Araport11)	NA	IR	AT2G44850.1	AT2G44850_ID2	gun1_24h	WT_24h
AT2G44850	hypothetical protein;(source:Araport11)	NA	IR	AT2G44850_P3	AT2G44850_ID2	gun1_24h	WT_24h
AT2G44850	hypothetical protein;(source:Araport11)	NA	A3	AT2G44850.1	AT2G44850_ID2	gun1_24h	WT_24h
AT2G46320	Mitochondrial substrate carrier family protein;(source:Araport11)	NA	A3	AT2G46320_P5	AT2G46320_c1	gun1_24h	WT_24h
AT2G46320	Mitochondrial substrate carrier family protein;(source:Araport11)	NA	A3	AT2G46320_ID2	AT2G46320_c1	gun1_24h	WT_24h
AT2G46320	Mitochondrial substrate carrier family protein;(source:Araport11)	NA	IR	AT2G46320_ID2	AT2G46320_c1	gun1_24h	WT_24h
AT2G46320	Mitochondrial substrate carrier family protein;(source:Araport11)	NA	IR	AT2G46320_P5	AT2G46320_c1	gun1_24h	WT_24h
AT2G46790	Pseudo-response regulator PRR9. Involved in clock function. PRR7 and PRR9 are partially redundant essential components of a temperature-sensitive circadian system. CCA1 and LHY had a positive effect on PRR9. Interact with TOC1 in a yeast two-hybrid assay. Acts as transcriptional repressor of CCA1 and LHY. Acts additively with EC, PRR5 and PRR7 to regulate hypocotyl growth under photoperiodic cond…	APRR9,PRR9,TL1	A5	AT2G46790_P4	AT2G46790_P2	gun1_24h	WT_24h
AT2G46790	Pseudo-response regulator PRR9. Involved in clock function. PRR7 and PRR9 are partially redundant essential components of a temperature-sensitive circadian system. CCA1 and LHY had a positive effect on PRR9. Interact with TOC1 in a yeast two-hybrid assay. Acts as transcriptional repressor of CCA1 and LHY. Acts additively with EC, PRR5 and PRR7 to regulate hypocotyl growth under photoperiodic cond…	APRR9,PRR9,TL1	IR	AT2G46790_P5	AT2G46790_P2	gun1_24h	WT_24h
AT2G46790	Pseudo-response regulator PRR9. Involved in clock function. PRR7 and PRR9 are partially redundant essential components of a temperature-sensitive circadian system. CCA1 and LHY had a positive effect on PRR9. Interact with TOC1 in a yeast two-hybrid assay. Acts as transcriptional repressor of CCA1 and LHY. Acts additively with EC, PRR5 and PRR7 to regulate hypocotyl growth under photoperiodic cond…	APRR9,PRR9,TL1	IR	AT2G46790_P4	AT2G46790_P2	gun1_24h	WT_24h
AT2G47470	Encodes a protein disulfide isomerase-like (PDIL) protein, a member of a multigene family within the thioredoxin (TRX) superfamily. Transcript levels for this gene are up-regulated in response to three different chemical inducers of ER stress (dithiothreitol, beta-mercaptoethanol, and tunicamycin). AtIRE1-2 does not appear to be required for this response, but the atbzip60 mutant has a diminished…	ATPDI11,ATPDIL2-1,MEE30,PDI11,UNE5	A5	AT2G47470.4	AT2G47470_P1	gun1_24h	WT_24h
AT2G47470	Encodes a protein disulfide isomerase-like (PDIL) protein, a member of a multigene family within the thioredoxin (TRX) superfamily. Transcript levels for this gene are up-regulated in response to three different chemical inducers of ER stress (dithiothreitol, beta-mercaptoethanol, and tunicamycin). AtIRE1-2 does not appear to be required for this response, but the atbzip60 mutant has a diminished…	ATPDI11,ATPDIL2-1,MEE30,PDI11,UNE5	A3	AT2G47470.4	AT2G47470_P1	gun1_24h	WT_24h
AT3G03340	LUC7 related protein;(source:Araport11)	LUC7A,UNE6	ES	AT3G03340.1	AT3G03340_ID1	gun1_24h	WT_24h
AT3G03340	LUC7 related protein;(source:Araport11)	LUC7A,UNE6	A5	AT3G03340_JS3	AT3G03340_ID1	gun1_24h	WT_24h
AT3G05480	Involved in the regulation of DNA damage repair and homologous recombination.	ATRAD9,RAD9	A3	AT3G05480_P2	AT3G05480_s1	gun1_24h	WT_24h
AT3G05670	RING/U-box protein;(source:Araport11)	NA	A3	AT3G05670_P2	AT3G05670_P1	gun1_24h	WT_24h
AT3G05670	RING/U-box protein;(source:Araport11)	NA	IR	AT3G05670_P2	AT3G05670_s2	gun1_24h	WT_24h
AT3G05670	RING/U-box protein;(source:Araport11)	NA	A5	AT3G05670_P2	AT3G05670_P1	gun1_24h	WT_24h
AT3G07750	3-5-exoribonuclease family protein;(source:Araport11)	RRP42	A3	AT3G07750_P1	AT3G07750_ID6	gun1_24h	WT_24h
AT3G07750	3-5-exoribonuclease family protein;(source:Araport11)	RRP42	A3	AT3G07750_P2	AT3G07750_ID6	gun1_24h	WT_24h
AT3G07750	3-5-exoribonuclease family protein;(source:Araport11)	RRP42	IR	AT3G07750_P2	AT3G07750_ID6	gun1_24h	WT_24h
AT3G09800	SNARE-like superfamily protein;(source:Araport11)	NA	IR	AT3G09800_JC2	AT3G09800_ID5	gun1_24h	WT_24h
AT3G11820	Encodes a syntaxin localized at the plasma membrane. SYR1/PEN1 is a member of the SNARE superfamily and functions in positioning anchoring of the KAT1 K+ channel protein at the plasma membrane. Transcription is upregulated by abscisic acid, suggesting a role in ABA signaling. Also functions in non-host resistance against barley powdery mildew. It is a nonessential component of the preinvasive res…	AT-SYR1,ATSYP121,ATSYR1,PEN1,SYP121,SYR1	IR	AT3G11820_ID2	AT3G11820_c2	gun1_24h	WT_24h
AT3G15750	Essential protein Yae1, N-terminal;(source:Araport11)	NA	IR	AT3G15750_ID4	AT3G15750_JC1	gun1_24h	WT_24h
AT3G15750	Essential protein Yae1, N-terminal;(source:Araport11)	NA	IR	AT3G15750_ID1	AT3G15750_JC1	gun1_24h	WT_24h
AT3G15770	hypothetical protein;(source:Araport11)	NA	IR	AT3G15770_ID1	AT3G15770_ID9	gun1_24h	WT_24h
AT3G15770	hypothetical protein;(source:Araport11)	NA	A3	AT3G15770_ID1	AT3G15770_ID4	gun1_24h	WT_24h
AT3G16270	Involved in the plant trans-Golgi network (TGN), where it is part of an adaptor protein (AP) complex to promote vesicle generation with different cargo specificity and destination. Interacts with AP-4, whose function is required for MTV1 recruitment.	NA	IR	AT3G16270_P3	AT3G16270_P1	gun1_24h	WT_24h
AT3G17900	Plant specific component of TRAPPII vesicle transport complex.	NA	IR	AT3G17900_P1	AT3G17900_JC9	gun1_24h	WT_24h
AT3G18520	Encodes a protein with similarity to histone deacetylases. The histone deacetylase domain of HDA15 (HDA15HD) assembles as tetrameric forms with each monomer composed of 12 alpha-helices and 9 beta-sheets (DOI: 10.1104/pp.20.00604).Plants expressing RNAi directed against this gene show a moderate resistance to agrobacterium-mediated root transformation. Class II RPD3-like family HDAC member which …	ATHDA15,HDA15	A3	AT3G18520_P1	AT3G18520_JC1	gun1_24h	WT_24h
AT3G18520	Encodes a protein with similarity to histone deacetylases. The histone deacetylase domain of HDA15 (HDA15HD) assembles as tetrameric forms with each monomer composed of 12 alpha-helices and 9 beta-sheets (DOI: 10.1104/pp.20.00604).Plants expressing RNAi directed against this gene show a moderate resistance to agrobacterium-mediated root transformation. Class II RPD3-like family HDAC member which …	ATHDA15,HDA15	IR	AT3G18520_JS9	AT3G18520_JC1	gun1_24h	WT_24h
AT3G18520	Encodes a protein with similarity to histone deacetylases. The histone deacetylase domain of HDA15 (HDA15HD) assembles as tetrameric forms with each monomer composed of 12 alpha-helices and 9 beta-sheets (DOI: 10.1104/pp.20.00604).Plants expressing RNAi directed against this gene show a moderate resistance to agrobacterium-mediated root transformation. Class II RPD3-like family HDAC member which …	ATHDA15,HDA15	A3	AT3G18520_JS9	AT3G18520_JC1	gun1_24h	WT_24h
AT3G22900	Non-catalytic subunit specific to DNA-directed RNA polymerase IV; homologous to budding yeast RPB7	NRPD7	A5	AT3G22900_P1	AT3G22900_ID2	gun1_24h	WT_24h
AT3G22900	Non-catalytic subunit specific to DNA-directed RNA polymerase IV; homologous to budding yeast RPB7	NRPD7	IR	AT3G22900_P1	AT3G22900_ID2	gun1_24h	WT_24h
AT3G26680	involved in a SNM-dependent recombinational repair process of oxidatively induced DNA damage.	ATSNM1,SNM1	A3	AT3G26680_c2	AT3G26680_ID2	gun1_24h	WT_24h
AT3G26680	involved in a SNM-dependent recombinational repair process of oxidatively induced DNA damage.	ATSNM1,SNM1	A5	AT3G26680_c2	AT3G26680_ID2	gun1_24h	WT_24h
AT3G26700	Protein kinase superfamily protein;(source:Araport11)	NA	A5	AT3G26700_P2	AT3G26700_P3	gun1_24h	WT_24h
AT3G26700	Protein kinase superfamily protein;(source:Araport11)	NA	IR	AT3G26700_P2	AT3G26700_P3	gun1_24h	WT_24h
AT3G26700	Protein kinase superfamily protein;(source:Araport11)	NA	IR	AT3G26700_P5	AT3G26700_P3	gun1_24h	WT_24h
AT3G26700	Protein kinase superfamily protein;(source:Araport11)	NA	A5	AT3G26700_P5	AT3G26700_P3	gun1_24h	WT_24h
AT3G27190	One of the homologous genes predicted to encode proteins with UPRT domains (Uracil phosphoribosyltransferase). Five of these genes (At5g40870, At3g27190, At1g55810, At4g26510 and At3g27440) show a high level of identity, and are annotated as also containing a N-terminal uracil kinase (UK) domain. These genes are referred to as UKL1 (UK-like 1), UKL2, UKL3, UKL4 and UKL5, respectively.	UKL2	A3	AT3G27190_P1	AT3G27190_ID3	gun1_24h	WT_24h
AT3G27190	One of the homologous genes predicted to encode proteins with UPRT domains (Uracil phosphoribosyltransferase). Five of these genes (At5g40870, At3g27190, At1g55810, At4g26510 and At3g27440) show a high level of identity, and are annotated as also containing a N-terminal uracil kinase (UK) domain. These genes are referred to as UKL1 (UK-like 1), UKL2, UKL3, UKL4 and UKL5, respectively.	UKL2	MES	AT3G27190_P1	AT3G27190_ID3	gun1_24h	WT_24h
AT3G27580	D6PK family kinase involved in pulse-induced phototropism but also for time-dependent second positive phototropism, and continuous light-induced hypocotyl phototropism.D6PKL3 is polarly localized within the plasma membrane. It is involved in pollen aperture formation. The protein is localized within distinct regions of the pollen plasma membrane and mutants are also defective in pollen aperture f…	ATPK7,D6PKL3	IR	AT3G27580_P2	AT3G27580_P1	gun1_24h	WT_24h
AT3G29100	Encodes a member of the Arabidopsis v-SNARE (vesicle soluble NSF attachment protein receptor) family that has 3 members: VTI11, VTI12, and VTI13. This gene is not expressed at levels detectable by RT-PCR. However, one EST corresponding to this gene has been isolated.	ATVTI13,VTI13	IR	AT3G29100_P1	AT3G29100_ID4	gun1_24h	WT_24h
[truncated: 139 more rows]
