# Supplementary material
Source: HighWire-hosted journal article supplement (doi:10.1101/rna.080738.125)
Supplement: S4_Data.xlsx [file S4_Data.xlsx]

## Sheet: S4_Data
gene_id	Primary_Gene_Symbol	All_Gene_Symbols	Gene_model_description	Transcript_ID	NMD_features
AT1G06190			Encodes a novel ribonucleic acid-binding protein that interacts with the endonuclease RNase E and supports its function in processing plastid ribonucleic acids.	AT1G06190.2	None
AT1G06190			Encodes a novel ribonucleic acid-binding protein that interacts with the endonuclease RNase E and supports its function in processing plastid ribonucleic acids.	AT1G06190_P1	None
AT1G06190			Encodes a novel ribonucleic acid-binding protein that interacts with the endonuclease RNase E and supports its function in processing plastid ribonucleic acids.	AT1G06190_P3	PTC
AT1G06190			Encodes a novel ribonucleic acid-binding protein that interacts with the endonuclease RNase E and supports its function in processing plastid ribonucleic acids.	AT1G06190_P5	None
AT1G06190			Encodes a novel ribonucleic acid-binding protein that interacts with the endonuclease RNase E and supports its function in processing plastid ribonucleic acids.	AT1G06190_P4	PTC
AT1G14150	PHOTOSYNTHETIC NDH SUBCOMPLEX L 2 (PnsL2)	PSBQ-LIKE 1 (PQL1)PHOTOSYNTHETIC NDH SUBCOMPLEX L 2 (PnsL2)PSBQ-LIKE 2 (PQL2)	Encodes a subunit of the NAD(P)H dehydrogenase complex located in the chloroplast thylakoid lumen.	AT1G14150_c1	None
AT1G14150	PHOTOSYNTHETIC NDH SUBCOMPLEX L 2 (PnsL2)	PSBQ-LIKE 1 (PQL1)PHOTOSYNTHETIC NDH SUBCOMPLEX L 2 (PnsL2)PSBQ-LIKE 2 (PQL2)	Encodes a subunit of the NAD(P)H dehydrogenase complex located in the chloroplast thylakoid lumen.	AT1G14150.1	None
AT1G14150	PHOTOSYNTHETIC NDH SUBCOMPLEX L 2 (PnsL2)	PSBQ-LIKE 1 (PQL1)PHOTOSYNTHETIC NDH SUBCOMPLEX L 2 (PnsL2)PSBQ-LIKE 2 (PQL2)	Encodes a subunit of the NAD(P)H dehydrogenase complex located in the chloroplast thylakoid lumen.	AT1G14150_P2	PTC
AT1G30520	ACYL-ACTIVATING ENZYME 14 (AAE14)	ACYL-ACTIVATING ENZYME 14 (AAE14)	Encodes a chloroplast O-succinylbenzoyl-CoA ligase. Involved in phylloquinone biosynthesis. Knock mutant is seedling lethal.	AT1G30520_s1	PTC
AT1G30520	ACYL-ACTIVATING ENZYME 14 (AAE14)	ACYL-ACTIVATING ENZYME 14 (AAE14)	Encodes a chloroplast O-succinylbenzoyl-CoA ligase. Involved in phylloquinone biosynthesis. Knock mutant is seedling lethal.	AT1G30520_P1	None
AT1G30520	ACYL-ACTIVATING ENZYME 14 (AAE14)	ACYL-ACTIVATING ENZYME 14 (AAE14)	Encodes a chloroplast O-succinylbenzoyl-CoA ligase. Involved in phylloquinone biosynthesis. Knock mutant is seedling lethal.	AT1G30520_JS5	PTC
AT1G30520	ACYL-ACTIVATING ENZYME 14 (AAE14)	ACYL-ACTIVATING ENZYME 14 (AAE14)	Encodes a chloroplast O-succinylbenzoyl-CoA ligase. Involved in phylloquinone biosynthesis. Knock mutant is seedling lethal.	AT1G30520_JS2	PTC
AT1G30520	ACYL-ACTIVATING ENZYME 14 (AAE14)	ACYL-ACTIVATING ENZYME 14 (AAE14)	Encodes a chloroplast O-succinylbenzoyl-CoA ligase. Involved in phylloquinone biosynthesis. Knock mutant is seedling lethal.	AT1G30520_s2	PTC
AT1G30520	ACYL-ACTIVATING ENZYME 14 (AAE14)	ACYL-ACTIVATING ENZYME 14 (AAE14)	Encodes a chloroplast O-succinylbenzoyl-CoA ligase. Involved in phylloquinone biosynthesis. Knock mutant is seedling lethal.	AT1G30520_JC6	PTC
AT1G30520	ACYL-ACTIVATING ENZYME 14 (AAE14)	ACYL-ACTIVATING ENZYME 14 (AAE14)	Encodes a chloroplast O-succinylbenzoyl-CoA ligase. Involved in phylloquinone biosynthesis. Knock mutant is seedling lethal.	AT1G30520_P4	None
AT1G30520	ACYL-ACTIVATING ENZYME 14 (AAE14)	ACYL-ACTIVATING ENZYME 14 (AAE14)	Encodes a chloroplast O-succinylbenzoyl-CoA ligase. Involved in phylloquinone biosynthesis. Knock mutant is seedling lethal.	AT1G30520_c1	PTC
AT1G30520	ACYL-ACTIVATING ENZYME 14 (AAE14)	ACYL-ACTIVATING ENZYME 14 (AAE14)	Encodes a chloroplast O-succinylbenzoyl-CoA ligase. Involved in phylloquinone biosynthesis. Knock mutant is seedling lethal.	AT1G30520_JC1	PTC
AT1G30520	ACYL-ACTIVATING ENZYME 14 (AAE14)	ACYL-ACTIVATING ENZYME 14 (AAE14)	Encodes a chloroplast O-succinylbenzoyl-CoA ligase. Involved in phylloquinone biosynthesis. Knock mutant is seedling lethal.	AT1G30520_P2	None
AT1G30520	ACYL-ACTIVATING ENZYME 14 (AAE14)	ACYL-ACTIVATING ENZYME 14 (AAE14)	Encodes a chloroplast O-succinylbenzoyl-CoA ligase. Involved in phylloquinone biosynthesis. Knock mutant is seedling lethal.	AT1G30520_JS4	PTC
AT1G30520	ACYL-ACTIVATING ENZYME 14 (AAE14)	ACYL-ACTIVATING ENZYME 14 (AAE14)	Encodes a chloroplast O-succinylbenzoyl-CoA ligase. Involved in phylloquinone biosynthesis. Knock mutant is seedling lethal.	AT1G30520_P3	None
AT1G50200	ALANYL-TRNA SYNTHETASE (ALATS)	ALANYL-TRNA SYNTHETASE (ALATS)	Alanyl-tRNA synthetase(source:Araport11)	AT1G50200_JS4	PTC
AT1G50200	ALANYL-TRNA SYNTHETASE (ALATS)	ALANYL-TRNA SYNTHETASE (ALATS)	Alanyl-tRNA synthetase(source:Araport11)	AT1G50200_JS2	PTC
AT1G50200	ALANYL-TRNA SYNTHETASE (ALATS)	ALANYL-TRNA SYNTHETASE (ALATS)	Alanyl-tRNA synthetase(source:Araport11)	AT1G50200_ID2	None
AT1G50200	ALANYL-TRNA SYNTHETASE (ALATS)	ALANYL-TRNA SYNTHETASE (ALATS)	Alanyl-tRNA synthetase(source:Araport11)	AT1G50200.2	None
AT1G50200	ALANYL-TRNA SYNTHETASE (ALATS)	ALANYL-TRNA SYNTHETASE (ALATS)	Alanyl-tRNA synthetase(source:Araport11)	AT1G50200_P1	None
AT1G50200	ALANYL-TRNA SYNTHETASE (ALATS)	ALANYL-TRNA SYNTHETASE (ALATS)	Alanyl-tRNA synthetase(source:Araport11)	AT1G50200_JS1	PTC
AT1G50200	ALANYL-TRNA SYNTHETASE (ALATS)	ALANYL-TRNA SYNTHETASE (ALATS)	Alanyl-tRNA synthetase(source:Araport11)	AT1G50200_JS3	PTC
AT1G71720	PIGMENT DEFECTIVE 338 (PDE338)	PIGMENT DEFECTIVE 338 (PDE338)PETB/PETD STABILIZING FACTOR (BSF)PHOTOSYSTEM BIOGENESIS REGULATOR 1 (PBR1)RBCL MRNA S1 BINDING DOMAIN PROTEIN (RLSB)	Encodes a chloroplast localized protein that regulates the translation of Ycf1 by binding to its mRNA. It is involved in the biogenesis of photosynthetic complexes.	AT1G71720_P2	None
AT1G71720	PIGMENT DEFECTIVE 338 (PDE338)	PIGMENT DEFECTIVE 338 (PDE338)PETB/PETD STABILIZING FACTOR (BSF)PHOTOSYSTEM BIOGENESIS REGULATOR 1 (PBR1)RBCL MRNA S1 BINDING DOMAIN PROTEIN (RLSB)	Encodes a chloroplast localized protein that regulates the translation of Ycf1 by binding to its mRNA. It is involved in the biogenesis of photosynthetic complexes.	AT1G71720_ID7	None
AT1G71720	PIGMENT DEFECTIVE 338 (PDE338)	PIGMENT DEFECTIVE 338 (PDE338)PETB/PETD STABILIZING FACTOR (BSF)PHOTOSYSTEM BIOGENESIS REGULATOR 1 (PBR1)RBCL MRNA S1 BINDING DOMAIN PROTEIN (RLSB)	Encodes a chloroplast localized protein that regulates the translation of Ycf1 by binding to its mRNA. It is involved in the biogenesis of photosynthetic complexes.	AT1G71720_ID8	None
AT1G71720	PIGMENT DEFECTIVE 338 (PDE338)	PIGMENT DEFECTIVE 338 (PDE338)PETB/PETD STABILIZING FACTOR (BSF)PHOTOSYSTEM BIOGENESIS REGULATOR 1 (PBR1)RBCL MRNA S1 BINDING DOMAIN PROTEIN (RLSB)	Encodes a chloroplast localized protein that regulates the translation of Ycf1 by binding to its mRNA. It is involved in the biogenesis of photosynthetic complexes.	AT1G71720_P1	None
AT1G71720	PIGMENT DEFECTIVE 338 (PDE338)	PIGMENT DEFECTIVE 338 (PDE338)PETB/PETD STABILIZING FACTOR (BSF)PHOTOSYSTEM BIOGENESIS REGULATOR 1 (PBR1)RBCL MRNA S1 BINDING DOMAIN PROTEIN (RLSB)	Encodes a chloroplast localized protein that regulates the translation of Ycf1 by binding to its mRNA. It is involved in the biogenesis of photosynthetic complexes.	AT1G71720_ID17	None
AT1G71720	PIGMENT DEFECTIVE 338 (PDE338)	PIGMENT DEFECTIVE 338 (PDE338)PETB/PETD STABILIZING FACTOR (BSF)PHOTOSYSTEM BIOGENESIS REGULATOR 1 (PBR1)RBCL MRNA S1 BINDING DOMAIN PROTEIN (RLSB)	Encodes a chloroplast localized protein that regulates the translation of Ycf1 by binding to its mRNA. It is involved in the biogenesis of photosynthetic complexes.	AT1G71720_JC3	PTC
AT1G71720	PIGMENT DEFECTIVE 338 (PDE338)	PIGMENT DEFECTIVE 338 (PDE338)PETB/PETD STABILIZING FACTOR (BSF)PHOTOSYSTEM BIOGENESIS REGULATOR 1 (PBR1)RBCL MRNA S1 BINDING DOMAIN PROTEIN (RLSB)	Encodes a chloroplast localized protein that regulates the translation of Ycf1 by binding to its mRNA. It is involved in the biogenesis of photosynthetic complexes.	AT1G71720_ID18	None
AT1G71720	PIGMENT DEFECTIVE 338 (PDE338)	PIGMENT DEFECTIVE 338 (PDE338)PETB/PETD STABILIZING FACTOR (BSF)PHOTOSYSTEM BIOGENESIS REGULATOR 1 (PBR1)RBCL MRNA S1 BINDING DOMAIN PROTEIN (RLSB)	Encodes a chloroplast localized protein that regulates the translation of Ycf1 by binding to its mRNA. It is involved in the biogenesis of photosynthetic complexes.	AT1G71720_c1	None
AT1G72640			NAD(P)-binding Rossmann-fold superfamily protein(source:Araport11)	AT1G72640_P2	None
AT1G72640			NAD(P)-binding Rossmann-fold superfamily protein(source:Araport11)	AT1G72640_ID20	PTC
AT1G72640			NAD(P)-binding Rossmann-fold superfamily protein(source:Araport11)	AT1G72640_ID11	PTC
AT1G72640			NAD(P)-binding Rossmann-fold superfamily protein(source:Araport11)	AT1G72640_ID16	PTC
AT1G72640			NAD(P)-binding Rossmann-fold superfamily protein(source:Araport11)	AT1G72640_ID14	PTC
AT1G72640			NAD(P)-binding Rossmann-fold superfamily protein(source:Araport11)	AT1G72640_P3	None
AT1G72640			NAD(P)-binding Rossmann-fold superfamily protein(source:Araport11)	AT1G72640_P4	None
AT1G72640			NAD(P)-binding Rossmann-fold superfamily protein(source:Araport11)	AT1G72640_c1	None
AT1G72640			NAD(P)-binding Rossmann-fold superfamily protein(source:Araport11)	AT1G72640_P1	None
AT1G72640			NAD(P)-binding Rossmann-fold superfamily protein(source:Araport11)	AT1G72640_ID15	PTC
AT1G72640			NAD(P)-binding Rossmann-fold superfamily protein(source:Araport11)	AT1G72640_ID19	PTC
AT1G80380	GLYCERATE KINASE (GLYK)	GLYCERATE KINASE (GLYK)	encodes a glycerate kinase which catalyzes the last step of photorespiration C2 cycle.	AT1G80380_P7	PTC
AT1G80380	GLYCERATE KINASE (GLYK)	GLYCERATE KINASE (GLYK)	encodes a glycerate kinase which catalyzes the last step of photorespiration C2 cycle.	AT1G80380_P2	None
AT1G80380	GLYCERATE KINASE (GLYK)	GLYCERATE KINASE (GLYK)	encodes a glycerate kinase which catalyzes the last step of photorespiration C2 cycle.	AT1G80380_P5	PTC
AT1G80380	GLYCERATE KINASE (GLYK)	GLYCERATE KINASE (GLYK)	encodes a glycerate kinase which catalyzes the last step of photorespiration C2 cycle.	AT1G80380_P8	PTC
AT1G80380	GLYCERATE KINASE (GLYK)	GLYCERATE KINASE (GLYK)	encodes a glycerate kinase which catalyzes the last step of photorespiration C2 cycle.	AT1G80380_P6	PTC
AT1G80380	GLYCERATE KINASE (GLYK)	GLYCERATE KINASE (GLYK)	encodes a glycerate kinase which catalyzes the last step of photorespiration C2 cycle.	AT1G80380.4	None
AT1G80380	GLYCERATE KINASE (GLYK)	GLYCERATE KINASE (GLYK)	encodes a glycerate kinase which catalyzes the last step of photorespiration C2 cycle.	AT1G80380_P3	PTC
AT2G01140	PIGMENT DEFECTIVE 345 (PDE345)	PIGMENT DEFECTIVE 345 (PDE345) (ATFBA3)FRUCTOSE-BISPHOSPHATE ALDOLASE 3 (FBA3)	Plastid localized fructose 1,6-bisphosphate aldolase, a CBB pathway enzyme.	AT2G01140_ID6	None
AT2G01140	PIGMENT DEFECTIVE 345 (PDE345)	PIGMENT DEFECTIVE 345 (PDE345) (ATFBA3)FRUCTOSE-BISPHOSPHATE ALDOLASE 3 (FBA3)	Plastid localized fructose 1,6-bisphosphate aldolase, a CBB pathway enzyme.	AT2G01140.1	None
AT2G01140	PIGMENT DEFECTIVE 345 (PDE345)	PIGMENT DEFECTIVE 345 (PDE345) (ATFBA3)FRUCTOSE-BISPHOSPHATE ALDOLASE 3 (FBA3)	Plastid localized fructose 1,6-bisphosphate aldolase, a CBB pathway enzyme.	AT2G01140_ID4	None
AT2G05710	ACONITASE 3 (ACO3)	ACONITASE 3 (ACO3)	Encodes an aconitase that can catalyze the conversion of citrate to isocitrate through a cis-aconitate intermediate, indicating that it may participate in the TCA cycle and other primary metabolic pathways. The protein is believed to accumulate in the mitochondria and the cytosol. It affects CSD2 (At2g28190 - a superoxide dismutase) transcript levels and may play a role in the response to oxidati…	AT2G05710_ID24	PTC
AT2G05710	ACONITASE 3 (ACO3)	ACONITASE 3 (ACO3)	Encodes an aconitase that can catalyze the conversion of citrate to isocitrate through a cis-aconitate intermediate, indicating that it may participate in the TCA cycle and other primary metabolic pathways. The protein is believed to accumulate in the mitochondria and the cytosol. It affects CSD2 (At2g28190 - a superoxide dismutase) transcript levels and may play a role in the response to oxidati…	AT2G05710_ID13	None
AT2G05710	ACONITASE 3 (ACO3)	ACONITASE 3 (ACO3)	Encodes an aconitase that can catalyze the conversion of citrate to isocitrate through a cis-aconitate intermediate, indicating that it may participate in the TCA cycle and other primary metabolic pathways. The protein is believed to accumulate in the mitochondria and the cytosol. It affects CSD2 (At2g28190 - a superoxide dismutase) transcript levels and may play a role in the response to oxidati…	AT2G05710_ID22	PTC
AT2G05710	ACONITASE 3 (ACO3)	ACONITASE 3 (ACO3)	Encodes an aconitase that can catalyze the conversion of citrate to isocitrate through a cis-aconitate intermediate, indicating that it may participate in the TCA cycle and other primary metabolic pathways. The protein is believed to accumulate in the mitochondria and the cytosol. It affects CSD2 (At2g28190 - a superoxide dismutase) transcript levels and may play a role in the response to oxidati…	AT2G05710_P1	None
AT2G05710	ACONITASE 3 (ACO3)	ACONITASE 3 (ACO3)	Encodes an aconitase that can catalyze the conversion of citrate to isocitrate through a cis-aconitate intermediate, indicating that it may participate in the TCA cycle and other primary metabolic pathways. The protein is believed to accumulate in the mitochondria and the cytosol. It affects CSD2 (At2g28190 - a superoxide dismutase) transcript levels and may play a role in the response to oxidati…	AT2G05710_ID23	PTC
AT2G25080	GLUTATHIONE PEROXIDASE 1 (GPX1)	GLUTATHIONE PEROXIDASE 1 (ATGPX1) (GPXL1)GLUTATHIONE PEROXIDASE 1 (GPX1)	Encodes glutathione peroxidase. The mRNA is cell-to-cell mobile.	AT2G25080_P1	None
AT2G25080	GLUTATHIONE PEROXIDASE 1 (GPX1)	GLUTATHIONE PEROXIDASE 1 (ATGPX1) (GPXL1)GLUTATHIONE PEROXIDASE 1 (GPX1)	Encodes glutathione peroxidase. The mRNA is cell-to-cell mobile.	AT2G25080_ID1	None
AT2G30170	PHOTOSYSTEM II CORE PHOSPHATASE (PBCP)	(ATPP2C26)PHOTOSYSTEM II CORE PHOSPHATASE (PBCP)	Encodes a chloroplast PP2C phosphatase that is required for efficient dephosphorylation of PSII proteins and involved in light acclimation.Loss of function enhances immunity to bacterial pathogens.	AT2G30170_P7	PTC
AT2G30170	PHOTOSYSTEM II CORE PHOSPHATASE (PBCP)	(ATPP2C26)PHOTOSYSTEM II CORE PHOSPHATASE (PBCP)	Encodes a chloroplast PP2C phosphatase that is required for efficient dephosphorylation of PSII proteins and involved in light acclimation.Loss of function enhances immunity to bacterial pathogens.	AT2G30170_P5	None
AT2G30170	PHOTOSYSTEM II CORE PHOSPHATASE (PBCP)	(ATPP2C26)PHOTOSYSTEM II CORE PHOSPHATASE (PBCP)	Encodes a chloroplast PP2C phosphatase that is required for efficient dephosphorylation of PSII proteins and involved in light acclimation.Loss of function enhances immunity to bacterial pathogens.	AT2G30170_P6	PTC
AT2G30170	PHOTOSYSTEM II CORE PHOSPHATASE (PBCP)	(ATPP2C26)PHOTOSYSTEM II CORE PHOSPHATASE (PBCP)	Encodes a chloroplast PP2C phosphatase that is required for efficient dephosphorylation of PSII proteins and involved in light acclimation.Loss of function enhances immunity to bacterial pathogens.	AT2G30170_P4	None
AT2G30170	PHOTOSYSTEM II CORE PHOSPHATASE (PBCP)	(ATPP2C26)PHOTOSYSTEM II CORE PHOSPHATASE (PBCP)	Encodes a chloroplast PP2C phosphatase that is required for efficient dephosphorylation of PSII proteins and involved in light acclimation.Loss of function enhances immunity to bacterial pathogens.	AT2G30170_ID15	PTC
AT2G30170	PHOTOSYSTEM II CORE PHOSPHATASE (PBCP)	(ATPP2C26)PHOTOSYSTEM II CORE PHOSPHATASE (PBCP)	Encodes a chloroplast PP2C phosphatase that is required for efficient dephosphorylation of PSII proteins and involved in light acclimation.Loss of function enhances immunity to bacterial pathogens.	AT2G30170_ID12	PTC
AT2G30170	PHOTOSYSTEM II CORE PHOSPHATASE (PBCP)	(ATPP2C26)PHOTOSYSTEM II CORE PHOSPHATASE (PBCP)	Encodes a chloroplast PP2C phosphatase that is required for efficient dephosphorylation of PSII proteins and involved in light acclimation.Loss of function enhances immunity to bacterial pathogens.	AT2G30170_P3	PTC
AT2G30170	PHOTOSYSTEM II CORE PHOSPHATASE (PBCP)	(ATPP2C26)PHOTOSYSTEM II CORE PHOSPHATASE (PBCP)	Encodes a chloroplast PP2C phosphatase that is required for efficient dephosphorylation of PSII proteins and involved in light acclimation.Loss of function enhances immunity to bacterial pathogens.	AT2G30170_ID17	PTC
AT2G30170	PHOTOSYSTEM II CORE PHOSPHATASE (PBCP)	(ATPP2C26)PHOTOSYSTEM II CORE PHOSPHATASE (PBCP)	Encodes a chloroplast PP2C phosphatase that is required for efficient dephosphorylation of PSII proteins and involved in light acclimation.Loss of function enhances immunity to bacterial pathogens.	AT2G30170_ID9	PTC
AT2G30170	PHOTOSYSTEM II CORE PHOSPHATASE (PBCP)	(ATPP2C26)PHOTOSYSTEM II CORE PHOSPHATASE (PBCP)	Encodes a chloroplast PP2C phosphatase that is required for efficient dephosphorylation of PSII proteins and involved in light acclimation.Loss of function enhances immunity to bacterial pathogens.	AT2G30170_P1	None
AT2G30170	PHOTOSYSTEM II CORE PHOSPHATASE (PBCP)	(ATPP2C26)PHOTOSYSTEM II CORE PHOSPHATASE (PBCP)	Encodes a chloroplast PP2C phosphatase that is required for efficient dephosphorylation of PSII proteins and involved in light acclimation.Loss of function enhances immunity to bacterial pathogens.	AT2G30170_ID3	PTC
AT2G30170	PHOTOSYSTEM II CORE PHOSPHATASE (PBCP)	(ATPP2C26)PHOTOSYSTEM II CORE PHOSPHATASE (PBCP)	Encodes a chloroplast PP2C phosphatase that is required for efficient dephosphorylation of PSII proteins and involved in light acclimation.Loss of function enhances immunity to bacterial pathogens.	AT2G30170_ID7	PTC
AT2G30170	PHOTOSYSTEM II CORE PHOSPHATASE (PBCP)	(ATPP2C26)PHOTOSYSTEM II CORE PHOSPHATASE (PBCP)	Encodes a chloroplast PP2C phosphatase that is required for efficient dephosphorylation of PSII proteins and involved in light acclimation.Loss of function enhances immunity to bacterial pathogens.	AT2G30170_ID14	None
AT2G30170	PHOTOSYSTEM II CORE PHOSPHATASE (PBCP)	(ATPP2C26)PHOTOSYSTEM II CORE PHOSPHATASE (PBCP)	Encodes a chloroplast PP2C phosphatase that is required for efficient dephosphorylation of PSII proteins and involved in light acclimation.Loss of function enhances immunity to bacterial pathogens.	AT2G30170_ID2	None
AT2G31955	COFACTOR OF NITRATE REDUCTASE AND XANTHINE DEHYDROGENASE 2 (CNX2)	COFACTOR OF NITRATE REDUCTASE AND XANTHINE DEHYDROGENASE 2 (CNX2)	COFACTOR OF NITRATE REDUCTASE AND XANTHINE DEHYDROGENASE 2. Encodes a protein involved in molybdenum cofactor biosynthesis. Homologous to E.coli moaA. Expression is abundant in all tissues examined, particularly in roots. Appears to have targeting signals for chloroplast or mitochondria.	AT2G31955_ID56	None
AT2G31955	COFACTOR OF NITRATE REDUCTASE AND XANTHINE DEHYDROGENASE 2 (CNX2)	COFACTOR OF NITRATE REDUCTASE AND XANTHINE DEHYDROGENASE 2 (CNX2)	COFACTOR OF NITRATE REDUCTASE AND XANTHINE DEHYDROGENASE 2. Encodes a protein involved in molybdenum cofactor biosynthesis. Homologous to E.coli moaA. Expression is abundant in all tissues examined, particularly in roots. Appears to have targeting signals for chloroplast or mitochondria.	AT2G31955_ID49	None
AT2G31955	COFACTOR OF NITRATE REDUCTASE AND XANTHINE DEHYDROGENASE 2 (CNX2)	COFACTOR OF NITRATE REDUCTASE AND XANTHINE DEHYDROGENASE 2 (CNX2)	COFACTOR OF NITRATE REDUCTASE AND XANTHINE DEHYDROGENASE 2. Encodes a protein involved in molybdenum cofactor biosynthesis. Homologous to E.coli moaA. Expression is abundant in all tissues examined, particularly in roots. Appears to have targeting signals for chloroplast or mitochondria.	AT2G31955_ID57	None
AT2G31955	COFACTOR OF NITRATE REDUCTASE AND XANTHINE DEHYDROGENASE 2 (CNX2)	COFACTOR OF NITRATE REDUCTASE AND XANTHINE DEHYDROGENASE 2 (CNX2)	COFACTOR OF NITRATE REDUCTASE AND XANTHINE DEHYDROGENASE 2. Encodes a protein involved in molybdenum cofactor biosynthesis. Homologous to E.coli moaA. Expression is abundant in all tissues examined, particularly in roots. Appears to have targeting signals for chloroplast or mitochondria.	AT2G31955_ID13	PTC
AT2G31955	COFACTOR OF NITRATE REDUCTASE AND XANTHINE DEHYDROGENASE 2 (CNX2)	COFACTOR OF NITRATE REDUCTASE AND XANTHINE DEHYDROGENASE 2 (CNX2)	COFACTOR OF NITRATE REDUCTASE AND XANTHINE DEHYDROGENASE 2. Encodes a protein involved in molybdenum cofactor biosynthesis. Homologous to E.coli moaA. Expression is abundant in all tissues examined, particularly in roots. Appears to have targeting signals for chloroplast or mitochondria.	AT2G31955_ID59	None
AT2G31955	COFACTOR OF NITRATE REDUCTASE AND XANTHINE DEHYDROGENASE 2 (CNX2)	COFACTOR OF NITRATE REDUCTASE AND XANTHINE DEHYDROGENASE 2 (CNX2)	COFACTOR OF NITRATE REDUCTASE AND XANTHINE DEHYDROGENASE 2. Encodes a protein involved in molybdenum cofactor biosynthesis. Homologous to E.coli moaA. Expression is abundant in all tissues examined, particularly in roots. Appears to have targeting signals for chloroplast or mitochondria.	AT2G31955.3	None
AT2G31955	COFACTOR OF NITRATE REDUCTASE AND XANTHINE DEHYDROGENASE 2 (CNX2)	COFACTOR OF NITRATE REDUCTASE AND XANTHINE DEHYDROGENASE 2 (CNX2)	COFACTOR OF NITRATE REDUCTASE AND XANTHINE DEHYDROGENASE 2. Encodes a protein involved in molybdenum cofactor biosynthesis. Homologous to E.coli moaA. Expression is abundant in all tissues examined, particularly in roots. Appears to have targeting signals for chloroplast or mitochondria.	AT2G31955_ID20	PTC
AT2G31955	COFACTOR OF NITRATE REDUCTASE AND XANTHINE DEHYDROGENASE 2 (CNX2)	COFACTOR OF NITRATE REDUCTASE AND XANTHINE DEHYDROGENASE 2 (CNX2)	COFACTOR OF NITRATE REDUCTASE AND XANTHINE DEHYDROGENASE 2. Encodes a protein involved in molybdenum cofactor biosynthesis. Homologous to E.coli moaA. Expression is abundant in all tissues examined, particularly in roots. Appears to have targeting signals for chloroplast or mitochondria.	AT2G31955_ID32	None
AT2G31955	COFACTOR OF NITRATE REDUCTASE AND XANTHINE DEHYDROGENASE 2 (CNX2)	COFACTOR OF NITRATE REDUCTASE AND XANTHINE DEHYDROGENASE 2 (CNX2)	COFACTOR OF NITRATE REDUCTASE AND XANTHINE DEHYDROGENASE 2. Encodes a protein involved in molybdenum cofactor biosynthesis. Homologous to E.coli moaA. Expression is abundant in all tissues examined, particularly in roots. Appears to have targeting signals for chloroplast or mitochondria.	AT2G31955_ID48	None
AT2G31955	COFACTOR OF NITRATE REDUCTASE AND XANTHINE DEHYDROGENASE 2 (CNX2)	COFACTOR OF NITRATE REDUCTASE AND XANTHINE DEHYDROGENASE 2 (CNX2)	COFACTOR OF NITRATE REDUCTASE AND XANTHINE DEHYDROGENASE 2. Encodes a protein involved in molybdenum cofactor biosynthesis. Homologous to E.coli moaA. Expression is abundant in all tissues examined, particularly in roots. Appears to have targeting signals for chloroplast or mitochondria.	AT2G31955_ID55	None
AT2G31955	COFACTOR OF NITRATE REDUCTASE AND XANTHINE DEHYDROGENASE 2 (CNX2)	COFACTOR OF NITRATE REDUCTASE AND XANTHINE DEHYDROGENASE 2 (CNX2)	COFACTOR OF NITRATE REDUCTASE AND XANTHINE DEHYDROGENASE 2. Encodes a protein involved in molybdenum cofactor biosynthesis. Homologous to E.coli moaA. Expression is abundant in all tissues examined, particularly in roots. Appears to have targeting signals for chloroplast or mitochondria.	AT2G31955_ID26	PTC
AT2G31955	COFACTOR OF NITRATE REDUCTASE AND XANTHINE DEHYDROGENASE 2 (CNX2)	COFACTOR OF NITRATE REDUCTASE AND XANTHINE DEHYDROGENASE 2 (CNX2)	COFACTOR OF NITRATE REDUCTASE AND XANTHINE DEHYDROGENASE 2. Encodes a protein involved in molybdenum cofactor biosynthesis. Homologous to E.coli moaA. Expression is abundant in all tissues examined, particularly in roots. Appears to have targeting signals for chloroplast or mitochondria.	AT2G31955_ID7	PTC
AT2G31955	COFACTOR OF NITRATE REDUCTASE AND XANTHINE DEHYDROGENASE 2 (CNX2)	COFACTOR OF NITRATE REDUCTASE AND XANTHINE DEHYDROGENASE 2 (CNX2)	COFACTOR OF NITRATE REDUCTASE AND XANTHINE DEHYDROGENASE 2. Encodes a protein involved in molybdenum cofactor biosynthesis. Homologous to E.coli moaA. Expression is abundant in all tissues examined, particularly in roots. Appears to have targeting signals for chloroplast or mitochondria.	AT2G31955_ID37	None
AT2G31955	COFACTOR OF NITRATE REDUCTASE AND XANTHINE DEHYDROGENASE 2 (CNX2)	COFACTOR OF NITRATE REDUCTASE AND XANTHINE DEHYDROGENASE 2 (CNX2)	COFACTOR OF NITRATE REDUCTASE AND XANTHINE DEHYDROGENASE 2. Encodes a protein involved in molybdenum cofactor biosynthesis. Homologous to E.coli moaA. Expression is abundant in all tissues examined, particularly in roots. Appears to have targeting signals for chloroplast or mitochondria.	AT2G31955_ID2	PTC
AT2G31955	COFACTOR OF NITRATE REDUCTASE AND XANTHINE DEHYDROGENASE 2 (CNX2)	COFACTOR OF NITRATE REDUCTASE AND XANTHINE DEHYDROGENASE 2 (CNX2)	COFACTOR OF NITRATE REDUCTASE AND XANTHINE DEHYDROGENASE 2. Encodes a protein involved in molybdenum cofactor biosynthesis. Homologous to E.coli moaA. Expression is abundant in all tissues examined, particularly in roots. Appears to have targeting signals for chloroplast or mitochondria.	AT2G31955_ID9	PTC
AT2G31955	COFACTOR OF NITRATE REDUCTASE AND XANTHINE DEHYDROGENASE 2 (CNX2)	COFACTOR OF NITRATE REDUCTASE AND XANTHINE DEHYDROGENASE 2 (CNX2)	COFACTOR OF NITRATE REDUCTASE AND XANTHINE DEHYDROGENASE 2. Encodes a protein involved in molybdenum cofactor biosynthesis. Homologous to E.coli moaA. Expression is abundant in all tissues examined, particularly in roots. Appears to have targeting signals for chloroplast or mitochondria.	AT2G31955_P6	None
AT2G31955	COFACTOR OF NITRATE REDUCTASE AND XANTHINE DEHYDROGENASE 2 (CNX2)	COFACTOR OF NITRATE REDUCTASE AND XANTHINE DEHYDROGENASE 2 (CNX2)	COFACTOR OF NITRATE REDUCTASE AND XANTHINE DEHYDROGENASE 2. Encodes a protein involved in molybdenum cofactor biosynthesis. Homologous to E.coli moaA. Expression is abundant in all tissues examined, particularly in roots. Appears to have targeting signals for chloroplast or mitochondria.	AT2G31955_ID50	None
AT2G31955	COFACTOR OF NITRATE REDUCTASE AND XANTHINE DEHYDROGENASE 2 (CNX2)	COFACTOR OF NITRATE REDUCTASE AND XANTHINE DEHYDROGENASE 2 (CNX2)	COFACTOR OF NITRATE REDUCTASE AND XANTHINE DEHYDROGENASE 2. Encodes a protein involved in molybdenum cofactor biosynthesis. Homologous to E.coli moaA. Expression is abundant in all tissues examined, particularly in roots. Appears to have targeting signals for chloroplast or mitochondria.	AT2G31955_ID27	PTC
AT2G31955	COFACTOR OF NITRATE REDUCTASE AND XANTHINE DEHYDROGENASE 2 (CNX2)	COFACTOR OF NITRATE REDUCTASE AND XANTHINE DEHYDROGENASE 2 (CNX2)	COFACTOR OF NITRATE REDUCTASE AND XANTHINE DEHYDROGENASE 2. Encodes a protein involved in molybdenum cofactor biosynthesis. Homologous to E.coli moaA. Expression is abundant in all tissues examined, particularly in roots. Appears to have targeting signals for chloroplast or mitochondria.	AT2G31955_ID29	None
AT2G31955	COFACTOR OF NITRATE REDUCTASE AND XANTHINE DEHYDROGENASE 2 (CNX2)	COFACTOR OF NITRATE REDUCTASE AND XANTHINE DEHYDROGENASE 2 (CNX2)	COFACTOR OF NITRATE REDUCTASE AND XANTHINE DEHYDROGENASE 2. Encodes a protein involved in molybdenum cofactor biosynthesis. Homologous to E.coli moaA. Expression is abundant in all tissues examined, particularly in roots. Appears to have targeting signals for chloroplast or mitochondria.	AT2G31955_ID47	None
AT2G31955	COFACTOR OF NITRATE REDUCTASE AND XANTHINE DEHYDROGENASE 2 (CNX2)	COFACTOR OF NITRATE REDUCTASE AND XANTHINE DEHYDROGENASE 2 (CNX2)	COFACTOR OF NITRATE REDUCTASE AND XANTHINE DEHYDROGENASE 2. Encodes a protein involved in molybdenum cofactor biosynthesis. Homologous to E.coli moaA. Expression is abundant in all tissues examined, particularly in roots. Appears to have targeting signals for chloroplast or mitochondria.	AT2G31955_ID74	PTC
AT2G31955	COFACTOR OF NITRATE REDUCTASE AND XANTHINE DEHYDROGENASE 2 (CNX2)	COFACTOR OF NITRATE REDUCTASE AND XANTHINE DEHYDROGENASE 2 (CNX2)	COFACTOR OF NITRATE REDUCTASE AND XANTHINE DEHYDROGENASE 2. Encodes a protein involved in molybdenum cofactor biosynthesis. Homologous to E.coli moaA. Expression is abundant in all tissues examined, particularly in roots. Appears to have targeting signals for chloroplast or mitochondria.	AT2G31955_ID14	PTC
AT2G31955	COFACTOR OF NITRATE REDUCTASE AND XANTHINE DEHYDROGENASE 2 (CNX2)	COFACTOR OF NITRATE REDUCTASE AND XANTHINE DEHYDROGENASE 2 (CNX2)	COFACTOR OF NITRATE REDUCTASE AND XANTHINE DEHYDROGENASE 2. Encodes a protein involved in molybdenum cofactor biosynthesis. Homologous to E.coli moaA. Expression is abundant in all tissues examined, particularly in roots. Appears to have targeting signals for chloroplast or mitochondria.	AT2G31955_ID41	None
AT2G31955	COFACTOR OF NITRATE REDUCTASE AND XANTHINE DEHYDROGENASE 2 (CNX2)	COFACTOR OF NITRATE REDUCTASE AND XANTHINE DEHYDROGENASE 2 (CNX2)	COFACTOR OF NITRATE REDUCTASE AND XANTHINE DEHYDROGENASE 2. Encodes a protein involved in molybdenum cofactor biosynthesis. Homologous to E.coli moaA. Expression is abundant in all tissues examined, particularly in roots. Appears to have targeting signals for chloroplast or mitochondria.	AT2G31955_ID42	None
AT2G31955	COFACTOR OF NITRATE REDUCTASE AND XANTHINE DEHYDROGENASE 2 (CNX2)	COFACTOR OF NITRATE REDUCTASE AND XANTHINE DEHYDROGENASE 2 (CNX2)	COFACTOR OF NITRATE REDUCTASE AND XANTHINE DEHYDROGENASE 2. Encodes a protein involved in molybdenum cofactor biosynthesis. Homologous to E.coli moaA. Expression is abundant in all tissues examined, particularly in roots. Appears to have targeting signals for chloroplast or mitochondria.	AT2G31955_ID39	None
AT2G31955	COFACTOR OF NITRATE REDUCTASE AND XANTHINE DEHYDROGENASE 2 (CNX2)	COFACTOR OF NITRATE REDUCTASE AND XANTHINE DEHYDROGENASE 2 (CNX2)	COFACTOR OF NITRATE REDUCTASE AND XANTHINE DEHYDROGENASE 2. Encodes a protein involved in molybdenum cofactor biosynthesis. Homologous to E.coli moaA. Expression is abundant in all tissues examined, particularly in roots. Appears to have targeting signals for chloroplast or mitochondria.	AT2G31955.2	None
AT2G31955	COFACTOR OF NITRATE REDUCTASE AND XANTHINE DEHYDROGENASE 2 (CNX2)	COFACTOR OF NITRATE REDUCTASE AND XANTHINE DEHYDROGENASE 2 (CNX2)	COFACTOR OF NITRATE REDUCTASE AND XANTHINE DEHYDROGENASE 2. Encodes a protein involved in molybdenum cofactor biosynthesis. Homologous to E.coli moaA. Expression is abundant in all tissues examined, particularly in roots. Appears to have targeting signals for chloroplast or mitochondria.	AT2G31955_ID31	None
AT2G31955	COFACTOR OF NITRATE REDUCTASE AND XANTHINE DEHYDROGENASE 2 (CNX2)	COFACTOR OF NITRATE REDUCTASE AND XANTHINE DEHYDROGENASE 2 (CNX2)	COFACTOR OF NITRATE REDUCTASE AND XANTHINE DEHYDROGENASE 2. Encodes a protein involved in molybdenum cofactor biosynthesis. Homologous to E.coli moaA. Expression is abundant in all tissues examined, particularly in roots. Appears to have targeting signals for chloroplast or mitochondria.	AT2G31955_ID46	PTC
AT2G31955	COFACTOR OF NITRATE REDUCTASE AND XANTHINE DEHYDROGENASE 2 (CNX2)	COFACTOR OF NITRATE REDUCTASE AND XANTHINE DEHYDROGENASE 2 (CNX2)	COFACTOR OF NITRATE REDUCTASE AND XANTHINE DEHYDROGENASE 2. Encodes a protein involved in molybdenum cofactor biosynthesis. Homologous to E.coli moaA. Expression is abundant in all tissues examined, particularly in roots. Appears to have targeting signals for chloroplast or mitochondria.	AT2G31955_ID17	None
AT2G31955	COFACTOR OF NITRATE REDUCTASE AND XANTHINE DEHYDROGENASE 2 (CNX2)	COFACTOR OF NITRATE REDUCTASE AND XANTHINE DEHYDROGENASE 2 (CNX2)	COFACTOR OF NITRATE REDUCTASE AND XANTHINE DEHYDROGENASE 2. Encodes a protein involved in molybdenum cofactor biosynthesis. Homologous to E.coli moaA. Expression is abundant in all tissues examined, particularly in roots. Appears to have targeting signals for chloroplast or mitochondria.	AT2G31955_ID15	PTC
AT2G31955	COFACTOR OF NITRATE REDUCTASE AND XANTHINE DEHYDROGENASE 2 (CNX2)	COFACTOR OF NITRATE REDUCTASE AND XANTHINE DEHYDROGENASE 2 (CNX2)	COFACTOR OF NITRATE REDUCTASE AND XANTHINE DEHYDROGENASE 2. Encodes a protein involved in molybdenum cofactor biosynthesis. Homologous to E.coli moaA. Expression is abundant in all tissues examined, particularly in roots. Appears to have targeting signals for chloroplast or mitochondria.	AT2G31955_ID40	PTC
AT2G31955	COFACTOR OF NITRATE REDUCTASE AND XANTHINE DEHYDROGENASE 2 (CNX2)	COFACTOR OF NITRATE REDUCTASE AND XANTHINE DEHYDROGENASE 2 (CNX2)	COFACTOR OF NITRATE REDUCTASE AND XANTHINE DEHYDROGENASE 2. Encodes a protein involved in molybdenum cofactor biosynthesis. Homologous to E.coli moaA. Expression is abundant in all tissues examined, particularly in roots. Appears to have targeting signals for chloroplast or mitochondria.	AT2G31955_ID45	None
AT2G31955	COFACTOR OF NITRATE REDUCTASE AND XANTHINE DEHYDROGENASE 2 (CNX2)	COFACTOR OF NITRATE REDUCTASE AND XANTHINE DEHYDROGENASE 2 (CNX2)	COFACTOR OF NITRATE REDUCTASE AND XANTHINE DEHYDROGENASE 2. Encodes a protein involved in molybdenum cofactor biosynthesis. Homologous to E.coli moaA. Expression is abundant in all tissues examined, particularly in roots. Appears to have targeting signals for chloroplast or mitochondria.	AT2G31955_ID8	PTC
AT2G31955	COFACTOR OF NITRATE REDUCTASE AND XANTHINE DEHYDROGENASE 2 (CNX2)	COFACTOR OF NITRATE REDUCTASE AND XANTHINE DEHYDROGENASE 2 (CNX2)	COFACTOR OF NITRATE REDUCTASE AND XANTHINE DEHYDROGENASE 2. Encodes a protein involved in molybdenum cofactor biosynthesis. Homologous to E.coli moaA. Expression is abundant in all tissues examined, particularly in roots. Appears to have targeting signals for chloroplast or mitochondria.	AT2G31955_ID19	PTC
AT2G31955	COFACTOR OF NITRATE REDUCTASE AND XANTHINE DEHYDROGENASE 2 (CNX2)	COFACTOR OF NITRATE REDUCTASE AND XANTHINE DEHYDROGENASE 2 (CNX2)	COFACTOR OF NITRATE REDUCTASE AND XANTHINE DEHYDROGENASE 2. Encodes a protein involved in molybdenum cofactor biosynthesis. Homologous to E.coli moaA. Expression is abundant in all tissues examined, particularly in roots. Appears to have targeting signals for chloroplast or mitochondria.	AT2G31955_ID43	None
AT2G31955	COFACTOR OF NITRATE REDUCTASE AND XANTHINE DEHYDROGENASE 2 (CNX2)	COFACTOR OF NITRATE REDUCTASE AND XANTHINE DEHYDROGENASE 2 (CNX2)	COFACTOR OF NITRATE REDUCTASE AND XANTHINE DEHYDROGENASE 2. Encodes a protein involved in molybdenum cofactor biosynthesis. Homologous to E.coli moaA. Expression is abundant in all tissues examined, particularly in roots. Appears to have targeting signals for chloroplast or mitochondria.	AT2G31955_ID16	PTC
AT2G47450	CHAOS (CAO)	CHLOROPLAST SIGNAL RECOGNITION PARTICLE 43 (CPSRP43)CHAOS (CAO)	A component of the chloroplast signal recognition particle pathway that is involved in LHCP targeting. It is downregulated in response to high light. It recognizes the DPLG motif in Lhcb1. The mRNA is cell-to-cell mobile.	AT2G47450_P1	None
AT2G47450	CHAOS (CAO)	CHLOROPLAST SIGNAL RECOGNITION PARTICLE 43 (CPSRP43)CHAOS (CAO)	A component of the chloroplast signal recognition particle pathway that is involved in LHCP targeting. It is downregulated in response to high light. It recognizes the DPLG motif in Lhcb1. The mRNA is cell-to-cell mobile.	AT2G47450_s1	None
AT3G01500	CARBONIC ANHYDRASE 1 (CA1)	(DEG10)CARBONIC ANHYDRASE 1 (CA1)	Encodes a putative beta-carbonic anhydrase betaCA1. Together with betaCA4 (At1g70410) regulates CO2-controlled stomatal movements in guard cells, as well as attenuates immunity. Differential CA gene expression in response to changing atmospheric CO2 conditions contribute to altered disease resistance levels. Activated by OXS2 under the treatment of salt.	AT3G01500_c1	PTC
AT3G01500	CARBONIC ANHYDRASE 1 (CA1)	(DEG10)CARBONIC ANHYDRASE 1 (CA1)	Encodes a putative beta-carbonic anhydrase betaCA1. Together with betaCA4 (At1g70410) regulates CO2-controlled stomatal movements in guard cells, as well as attenuates immunity. Differential CA gene expression in response to changing atmospheric CO2 conditions contribute to altered disease resistance levels. Activated by OXS2 under the treatment of salt.	AT3G01500_ID11	None
AT3G01500	CARBONIC ANHYDRASE 1 (CA1)	(DEG10)CARBONIC ANHYDRASE 1 (CA1)	Encodes a putative beta-carbonic anhydrase betaCA1. Together with betaCA4 (At1g70410) regulates CO2-controlled stomatal movements in guard cells, as well as attenuates immunity. Differential CA gene expression in response to changing atmospheric CO2 conditions contribute to altered disease resistance levels. Activated by OXS2 under the treatment of salt.	AT3G01500_ID8	None
AT3G01500	CARBONIC ANHYDRASE 1 (CA1)	(DEG10)CARBONIC ANHYDRASE 1 (CA1)	Encodes a putative beta-carbonic anhydrase betaCA1. Together with betaCA4 (At1g70410) regulates CO2-controlled stomatal movements in guard cells, as well as attenuates immunity. Differential CA gene expression in response to changing atmospheric CO2 conditions contribute to altered disease resistance levels. Activated by OXS2 under the treatment of salt.	AT3G01500_ID7	None
AT3G01500	CARBONIC ANHYDRASE 1 (CA1)	(DEG10)CARBONIC ANHYDRASE 1 (CA1)	Encodes a putative beta-carbonic anhydrase betaCA1. Together with betaCA4 (At1g70410) regulates CO2-controlled stomatal movements in guard cells, as well as attenuates immunity. Differential CA gene expression in response to changing atmospheric CO2 conditions contribute to altered disease resistance levels. Activated by OXS2 under the treatment of salt.	AT3G01500_ID12	None
AT3G01500	CARBONIC ANHYDRASE 1 (CA1)	(DEG10)CARBONIC ANHYDRASE 1 (CA1)	Encodes a putative beta-carbonic anhydrase betaCA1. Together with betaCA4 (At1g70410) regulates CO2-controlled stomatal movements in guard cells, as well as attenuates immunity. Differential CA gene expression in response to changing atmospheric CO2 conditions contribute to altered disease resistance levels. Activated by OXS2 under the treatment of salt.	AT3G01500.2	None
AT3G01500	CARBONIC ANHYDRASE 1 (CA1)	(DEG10)CARBONIC ANHYDRASE 1 (CA1)	Encodes a putative beta-carbonic anhydrase betaCA1. Together with betaCA4 (At1g70410) regulates CO2-controlled stomatal movements in guard cells, as well as attenuates immunity. Differential CA gene expression in response to changing atmospheric CO2 conditions contribute to altered disease resistance levels. Activated by OXS2 under the treatment of salt.	AT3G01500_P4	PTC
AT3G01500	CARBONIC ANHYDRASE 1 (CA1)	(DEG10)CARBONIC ANHYDRASE 1 (CA1)	Encodes a putative beta-carbonic anhydrase betaCA1. Together with betaCA4 (At1g70410) regulates CO2-controlled stomatal movements in guard cells, as well as attenuates immunity. Differential CA gene expression in response to changing atmospheric CO2 conditions contribute to altered disease resistance levels. Activated by OXS2 under the treatment of salt.	AT3G01500.1	PTC
AT3G18930	ARABIDOPSIS T??XICOS EN LEVADURA 65 (ATL65)	ARABIDOPSIS T??XICOS EN LEVADURA 65 (ATL65)	RING/U-box superfamily protein(source:Araport11)	AT3G18930_P1	None
AT3G18930	ARABIDOPSIS T??XICOS EN LEVADURA 65 (ATL65)	ARABIDOPSIS T??XICOS EN LEVADURA 65 (ATL65)	RING/U-box superfamily protein(source:Araport11)	AT3G18930.2	None
AT3G18930	ARABIDOPSIS T??XICOS EN LEVADURA 65 (ATL65)	ARABIDOPSIS T??XICOS EN LEVADURA 65 (ATL65)	RING/U-box superfamily protein(source:Araport11)	AT3G18930_P3	None
AT3G25740	METHIONINE AMINOPEPTIDASE 1C (MAP1B)	METHIONINE AMINOPEPTIDASE 1C (MAP1C)METHIONINE AMINOPEPTIDASE 1C (MAP1B)	Encodes a plastid localized methionine aminopeptidase. Formerly called MAP1C, now called MAP1B.	AT3G25740_ID27	None
AT3G25740	METHIONINE AMINOPEPTIDASE 1C (MAP1B)	METHIONINE AMINOPEPTIDASE 1C (MAP1C)METHIONINE AMINOPEPTIDASE 1C (MAP1B)	Encodes a plastid localized methionine aminopeptidase. Formerly called MAP1C, now called MAP1B.	AT3G25740_ID28	None
AT3G25740	METHIONINE AMINOPEPTIDASE 1C (MAP1B)	METHIONINE AMINOPEPTIDASE 1C (MAP1C)METHIONINE AMINOPEPTIDASE 1C (MAP1B)	Encodes a plastid localized methionine aminopeptidase. Formerly called MAP1C, now called MAP1B.	AT3G25740_ID5	None
AT3G25740	METHIONINE AMINOPEPTIDASE 1C (MAP1B)	METHIONINE AMINOPEPTIDASE 1C (MAP1C)METHIONINE AMINOPEPTIDASE 1C (MAP1B)	Encodes a plastid localized methionine aminopeptidase. Formerly called MAP1C, now called MAP1B.	AT3G25740_ID21	None
AT3G25740	METHIONINE AMINOPEPTIDASE 1C (MAP1B)	METHIONINE AMINOPEPTIDASE 1C (MAP1C)METHIONINE AMINOPEPTIDASE 1C (MAP1B)	Encodes a plastid localized methionine aminopeptidase. Formerly called MAP1C, now called MAP1B.	AT3G25740_ID29	None
AT3G25740	METHIONINE AMINOPEPTIDASE 1C (MAP1B)	METHIONINE AMINOPEPTIDASE 1C (MAP1C)METHIONINE AMINOPEPTIDASE 1C (MAP1B)	Encodes a plastid localized methionine aminopeptidase. Formerly called MAP1C, now called MAP1B.	AT3G25740_ID1	None
AT3G25740	METHIONINE AMINOPEPTIDASE 1C (MAP1B)	METHIONINE AMINOPEPTIDASE 1C (MAP1C)METHIONINE AMINOPEPTIDASE 1C (MAP1B)	Encodes a plastid localized methionine aminopeptidase. Formerly called MAP1C, now called MAP1B.	AT3G25740_ID31	None
AT3G25740	METHIONINE AMINOPEPTIDASE 1C (MAP1B)	METHIONINE AMINOPEPTIDASE 1C (MAP1C)METHIONINE AMINOPEPTIDASE 1C (MAP1B)	Encodes a plastid localized methionine aminopeptidase. Formerly called MAP1C, now called MAP1B.	AT3G25740_P1	None
AT3G25740	METHIONINE AMINOPEPTIDASE 1C (MAP1B)	METHIONINE AMINOPEPTIDASE 1C (MAP1C)METHIONINE AMINOPEPTIDASE 1C (MAP1B)	Encodes a plastid localized methionine aminopeptidase. Formerly called MAP1C, now called MAP1B.	AT3G25740_ID32	None
AT3G25740	METHIONINE AMINOPEPTIDASE 1C (MAP1B)	METHIONINE AMINOPEPTIDASE 1C (MAP1C)METHIONINE AMINOPEPTIDASE 1C (MAP1B)	Encodes a plastid localized methionine aminopeptidase. Formerly called MAP1C, now called MAP1B.	AT3G25740_ID17	None
AT3G25740	METHIONINE AMINOPEPTIDASE 1C (MAP1B)	METHIONINE AMINOPEPTIDASE 1C (MAP1C)METHIONINE AMINOPEPTIDASE 1C (MAP1B)	Encodes a plastid localized methionine aminopeptidase. Formerly called MAP1C, now called MAP1B.	AT3G25740_ID9	None
AT3G25740	METHIONINE AMINOPEPTIDASE 1C (MAP1B)	METHIONINE AMINOPEPTIDASE 1C (MAP1C)METHIONINE AMINOPEPTIDASE 1C (MAP1B)	Encodes a plastid localized methionine aminopeptidase. Formerly called MAP1C, now called MAP1B.	AT3G25740_P2	None
AT3G25740	METHIONINE AMINOPEPTIDASE 1C (MAP1B)	METHIONINE AMINOPEPTIDASE 1C (MAP1C)METHIONINE AMINOPEPTIDASE 1C (MAP1B)	Encodes a plastid localized methionine aminopeptidase. Formerly called MAP1C, now called MAP1B.	AT3G25740_ID12	None
AT3G27190	URIDINE KINASE-LIKE 2 (UKL2)	URIDINE KINASE-LIKE 2 (UKL2)URIDINE/CYTIDINE KINASE 2 (UCK2)	One of the homologous genes predicted to encode proteins with UPRT domains (Uracil phosphoribosyltransferase). Five of these genes (At5g40870, At3g27190, At1g55810, At4g26510 and At3g27440) show a high level of identity, and are annotated as also containing a N-terminal uracil kinase (UK) domain. These genes are referred to as UKL1 (UK-like 1), UKL2, UKL3, UKL4 and UKL5, respectively.	AT3G27190_P1	None
AT3G27190	URIDINE KINASE-LIKE 2 (UKL2)	URIDINE KINASE-LIKE 2 (UKL2)URIDINE/CYTIDINE KINASE 2 (UCK2)	One of the homologous genes predicted to encode proteins with UPRT domains (Uracil phosphoribosyltransferase). Five of these genes (At5g40870, At3g27190, At1g55810, At4g26510 and At3g27440) show a high level of identity, and are annotated as also containing a N-terminal uracil kinase (UK) domain. These genes are referred to as UKL1 (UK-like 1), UKL2, UKL3, UKL4 and UKL5, respectively.	AT3G27190_JS2	PTC
AT3G27190	URIDINE KINASE-LIKE 2 (UKL2)	URIDINE KINASE-LIKE 2 (UKL2)URIDINE/CYTIDINE KINASE 2 (UCK2)	One of the homologous genes predicted to encode proteins with UPRT domains (Uracil phosphoribosyltransferase). Five of these genes (At5g40870, At3g27190, At1g55810, At4g26510 and At3g27440) show a high level of identity, and are annotated as also containing a N-terminal uracil kinase (UK) domain. These genes are referred to as UKL1 (UK-like 1), UKL2, UKL3, UKL4 and UKL5, respectively.	AT3G27190_c1	PTC
AT3G27190	URIDINE KINASE-LIKE 2 (UKL2)	URIDINE KINASE-LIKE 2 (UKL2)URIDINE/CYTIDINE KINASE 2 (UCK2)	One of the homologous genes predicted to encode proteins with UPRT domains (Uracil phosphoribosyltransferase). Five of these genes (At5g40870, At3g27190, At1g55810, At4g26510 and At3g27440) show a high level of identity, and are annotated as also containing a N-terminal uracil kinase (UK) domain. These genes are referred to as UKL1 (UK-like 1), UKL2, UKL3, UKL4 and UKL5, respectively.	AT3G27190_c2	None
AT3G27190	URIDINE KINASE-LIKE 2 (UKL2)	URIDINE KINASE-LIKE 2 (UKL2)URIDINE/CYTIDINE KINASE 2 (UCK2)	One of the homologous genes predicted to encode proteins with UPRT domains (Uracil phosphoribosyltransferase). Five of these genes (At5g40870, At3g27190, At1g55810, At4g26510 and At3g27440) show a high level of identity, and are annotated as also containing a N-terminal uracil kinase (UK) domain. These genes are referred to as UKL1 (UK-like 1), UKL2, UKL3, UKL4 and UKL5, respectively.	AT3G27190_ID3	None
AT3G27190	URIDINE KINASE-LIKE 2 (UKL2)	URIDINE KINASE-LIKE 2 (UKL2)URIDINE/CYTIDINE KINASE 2 (UCK2)	One of the homologous genes predicted to encode proteins with UPRT domains (Uracil phosphoribosyltransferase). Five of these genes (At5g40870, At3g27190, At1g55810, At4g26510 and At3g27440) show a high level of identity, and are annotated as also containing a N-terminal uracil kinase (UK) domain. These genes are referred to as UKL1 (UK-like 1), UKL2, UKL3, UKL4 and UKL5, respectively.	AT3G27190_ID8	PTC
AT3G27925	DEGRADATION OF PERIPLASMIC PROTEINS 1 (DEG1)	DEGRADATION OF PERIPLASMIC PROTEINS 1 (DEG1)DEGP PROTEASE 1 (DEGP1)	Encodes a DegP protease nuclear gene encoding chloroplast-targeted protease that can degrade two lumenal proteins, plastocyanin and OE33, suggesting a role as a general-purpose protease in the thylakoid lumen. Involved in the degradation of D1 protein of PS II, hence participating in the repair of PS II damages caused by photoinhibition. The mRNA is cell-to-cell mobile.	AT3G27925_P1	None
AT3G27925	DEGRADATION OF PERIPLASMIC PROTEINS 1 (DEG1)	DEGRADATION OF PERIPLASMIC PROTEINS 1 (DEG1)DEGP PROTEASE 1 (DEGP1)	Encodes a DegP protease nuclear gene encoding chloroplast-targeted protease that can degrade two lumenal proteins, plastocyanin and OE33, suggesting a role as a general-purpose protease in the thylakoid lumen. Involved in the degradation of D1 protein of PS II, hence participating in the repair of PS II damages caused by photoinhibition. The mRNA is cell-to-cell mobile.	AT3G27925_c2	PTC
AT3G27925	DEGRADATION OF PERIPLASMIC PROTEINS 1 (DEG1)	DEGRADATION OF PERIPLASMIC PROTEINS 1 (DEG1)DEGP PROTEASE 1 (DEGP1)	Encodes a DegP protease nuclear gene encoding chloroplast-targeted protease that can degrade two lumenal proteins, plastocyanin and OE33, suggesting a role as a general-purpose protease in the thylakoid lumen. Involved in the degradation of D1 protein of PS II, hence participating in the repair of PS II damages caused by photoinhibition. The mRNA is cell-to-cell mobile.	AT3G27925_c1	None
AT3G27925	DEGRADATION OF PERIPLASMIC PROTEINS 1 (DEG1)	DEGRADATION OF PERIPLASMIC PROTEINS 1 (DEG1)DEGP PROTEASE 1 (DEGP1)	Encodes a DegP protease nuclear gene encoding chloroplast-targeted protease that can degrade two lumenal proteins, plastocyanin and OE33, suggesting a role as a general-purpose protease in the thylakoid lumen. Involved in the degradation of D1 protein of PS II, hence participating in the repair of PS II damages caused by photoinhibition. The mRNA is cell-to-cell mobile.	AT3G27925_c3	None
AT3G27925	DEGRADATION OF PERIPLASMIC PROTEINS 1 (DEG1)	DEGRADATION OF PERIPLASMIC PROTEINS 1 (DEG1)DEGP PROTEASE 1 (DEGP1)	Encodes a DegP protease nuclear gene encoding chloroplast-targeted protease that can degrade two lumenal proteins, plastocyanin and OE33, suggesting a role as a general-purpose protease in the thylakoid lumen. Involved in the degradation of D1 protein of PS II, hence participating in the repair of PS II damages caused by photoinhibition. The mRNA is cell-to-cell mobile.	AT3G27925_P2	None
AT3G52180	STARCH-EXCESS 4 (SEX4)	(ATPTPKIS1) (ATSEX4)STARCH-EXCESS 4 (SEX4)DUAL-SPECIFICITY PROTEIN PHOSPHATASE 4 (DSP4)	Encodes a plant-specific glucan phosphatase that contains a noncatalytic carbohydrate-binding module as well as a dual specificity protein phosphatase domain. SEX4 can dephosphorylate C6- and C3-glucosyl residues on native starch grains and related maltodextrin compounds in vitro. This protein interacts with the plant SnRK AKIN11, binds starch, and is localized in the chloroplast. sex4 mutants ha…	AT3G52180_P3	None
AT3G52180	STARCH-EXCESS 4 (SEX4)	(ATPTPKIS1) (ATSEX4)STARCH-EXCESS 4 (SEX4)DUAL-SPECIFICITY PROTEIN PHOSPHATASE 4 (DSP4)	Encodes a plant-specific glucan phosphatase that contains a noncatalytic carbohydrate-binding module as well as a dual specificity protein phosphatase domain. SEX4 can dephosphorylate C6- and C3-glucosyl residues on native starch grains and related maltodextrin compounds in vitro. This protein interacts with the plant SnRK AKIN11, binds starch, and is localized in the chloroplast. sex4 mutants ha…	AT3G52180_ID8	None
AT3G52180	STARCH-EXCESS 4 (SEX4)	(ATPTPKIS1) (ATSEX4)STARCH-EXCESS 4 (SEX4)DUAL-SPECIFICITY PROTEIN PHOSPHATASE 4 (DSP4)	Encodes a plant-specific glucan phosphatase that contains a noncatalytic carbohydrate-binding module as well as a dual specificity protein phosphatase domain. SEX4 can dephosphorylate C6- and C3-glucosyl residues on native starch grains and related maltodextrin compounds in vitro. This protein interacts with the plant SnRK AKIN11, binds starch, and is localized in the chloroplast. sex4 mutants ha…	AT3G52180_P2	None
AT3G52180	STARCH-EXCESS 4 (SEX4)	(ATPTPKIS1) (ATSEX4)STARCH-EXCESS 4 (SEX4)DUAL-SPECIFICITY PROTEIN PHOSPHATASE 4 (DSP4)	Encodes a plant-specific glucan phosphatase that contains a noncatalytic carbohydrate-binding module as well as a dual specificity protein phosphatase domain. SEX4 can dephosphorylate C6- and C3-glucosyl residues on native starch grains and related maltodextrin compounds in vitro. This protein interacts with the plant SnRK AKIN11, binds starch, and is localized in the chloroplast. sex4 mutants ha…	AT3G52180_s2	None
AT3G52180	STARCH-EXCESS 4 (SEX4)	(ATPTPKIS1) (ATSEX4)STARCH-EXCESS 4 (SEX4)DUAL-SPECIFICITY PROTEIN PHOSPHATASE 4 (DSP4)	Encodes a plant-specific glucan phosphatase that contains a noncatalytic carbohydrate-binding module as well as a dual specificity protein phosphatase domain. SEX4 can dephosphorylate C6- and C3-glucosyl residues on native starch grains and related maltodextrin compounds in vitro. This protein interacts with the plant SnRK AKIN11, binds starch, and is localized in the chloroplast. sex4 mutants ha…	AT3G52180_ID9	PTC
AT3G52180	STARCH-EXCESS 4 (SEX4)	(ATPTPKIS1) (ATSEX4)STARCH-EXCESS 4 (SEX4)DUAL-SPECIFICITY PROTEIN PHOSPHATASE 4 (DSP4)	Encodes a plant-specific glucan phosphatase that contains a noncatalytic carbohydrate-binding module as well as a dual specificity protein phosphatase domain. SEX4 can dephosphorylate C6- and C3-glucosyl residues on native starch grains and related maltodextrin compounds in vitro. This protein interacts with the plant SnRK AKIN11, binds starch, and is localized in the chloroplast. sex4 mutants ha…	AT3G52180_JS5	None
AT3G52180	STARCH-EXCESS 4 (SEX4)	(ATPTPKIS1) (ATSEX4)STARCH-EXCESS 4 (SEX4)DUAL-SPECIFICITY PROTEIN PHOSPHATASE 4 (DSP4)	Encodes a plant-specific glucan phosphatase that contains a noncatalytic carbohydrate-binding module as well as a dual specificity protein phosphatase domain. SEX4 can dephosphorylate C6- and C3-glucosyl residues on native starch grains and related maltodextrin compounds in vitro. This protein interacts with the plant SnRK AKIN11, binds starch, and is localized in the chloroplast. sex4 mutants ha…	AT3G52180_P1	None
AT3G52180	STARCH-EXCESS 4 (SEX4)	(ATPTPKIS1) (ATSEX4)STARCH-EXCESS 4 (SEX4)DUAL-SPECIFICITY PROTEIN PHOSPHATASE 4 (DSP4)	Encodes a plant-specific glucan phosphatase that contains a noncatalytic carbohydrate-binding module as well as a dual specificity protein phosphatase domain. SEX4 can dephosphorylate C6- and C3-glucosyl residues on native starch grains and related maltodextrin compounds in vitro. This protein interacts with the plant SnRK AKIN11, binds starch, and is localized in the chloroplast. sex4 mutants ha…	AT3G52180_ID2	None
AT3G52180	STARCH-EXCESS 4 (SEX4)	(ATPTPKIS1) (ATSEX4)STARCH-EXCESS 4 (SEX4)DUAL-SPECIFICITY PROTEIN PHOSPHATASE 4 (DSP4)	Encodes a plant-specific glucan phosphatase that contains a noncatalytic carbohydrate-binding module as well as a dual specificity protein phosphatase domain. SEX4 can dephosphorylate C6- and C3-glucosyl residues on native starch grains and related maltodextrin compounds in vitro. This protein interacts with the plant SnRK AKIN11, binds starch, and is localized in the chloroplast. sex4 mutants ha…	AT3G52180_P4	PTC
AT3G52180	STARCH-EXCESS 4 (SEX4)	(ATPTPKIS1) (ATSEX4)STARCH-EXCESS 4 (SEX4)DUAL-SPECIFICITY PROTEIN PHOSPHATASE 4 (DSP4)	Encodes a plant-specific glucan phosphatase that contains a noncatalytic carbohydrate-binding module as well as a dual specificity protein phosphatase domain. SEX4 can dephosphorylate C6- and C3-glucosyl residues on native starch grains and related maltodextrin compounds in vitro. This protein interacts with the plant SnRK AKIN11, binds starch, and is localized in the chloroplast. sex4 mutants ha…	AT3G52180_s1	None
AT3G54050	HIGH CYCLIC ELECTRON FLOW 1 (HCEF1)	(CFBP1)HIGH CYCLIC ELECTRON FLOW 1 (HCEF1)	Encodes a chloroplastic fructose 1,6-bisphosphate phosphatase. also known as HCEF1 (High Cyclic Electron Flow 1). hcef1 mutants have constitutively elevated electron flow (CEFI) and plants with antisense suppression of this enzyme have higher levels of net leaf photosynthesis and increased sucrose biosynthesis. The mRNA is cell-to-cell mobile.	AT3G54050_JC2	None
AT3G54050	HIGH CYCLIC ELECTRON FLOW 1 (HCEF1)	(CFBP1)HIGH CYCLIC ELECTRON FLOW 1 (HCEF1)	Encodes a chloroplastic fructose 1,6-bisphosphate phosphatase. also known as HCEF1 (High Cyclic Electron Flow 1). hcef1 mutants have constitutively elevated electron flow (CEFI) and plants with antisense suppression of this enzyme have higher levels of net leaf photosynthesis and increased sucrose biosynthesis. The mRNA is cell-to-cell mobile.	AT3G54050.2	None
AT3G54050	HIGH CYCLIC ELECTRON FLOW 1 (HCEF1)	(CFBP1)HIGH CYCLIC ELECTRON FLOW 1 (HCEF1)	Encodes a chloroplastic fructose 1,6-bisphosphate phosphatase. also known as HCEF1 (High Cyclic Electron Flow 1). hcef1 mutants have constitutively elevated electron flow (CEFI) and plants with antisense suppression of this enzyme have higher levels of net leaf photosynthesis and increased sucrose biosynthesis. The mRNA is cell-to-cell mobile.	AT3G54050_ID2	PTC
AT3G54050	HIGH CYCLIC ELECTRON FLOW 1 (HCEF1)	(CFBP1)HIGH CYCLIC ELECTRON FLOW 1 (HCEF1)	Encodes a chloroplastic fructose 1,6-bisphosphate phosphatase. also known as HCEF1 (High Cyclic Electron Flow 1). hcef1 mutants have constitutively elevated electron flow (CEFI) and plants with antisense suppression of this enzyme have higher levels of net leaf photosynthesis and increased sucrose biosynthesis. The mRNA is cell-to-cell mobile.	AT3G54050_ID1	PTC
AT3G54050	HIGH CYCLIC ELECTRON FLOW 1 (HCEF1)	(CFBP1)HIGH CYCLIC ELECTRON FLOW 1 (HCEF1)	Encodes a chloroplastic fructose 1,6-bisphosphate phosphatase. also known as HCEF1 (High Cyclic Electron Flow 1). hcef1 mutants have constitutively elevated electron flow (CEFI) and plants with antisense suppression of this enzyme have higher levels of net leaf photosynthesis and increased sucrose biosynthesis. The mRNA is cell-to-cell mobile.	AT3G54050_P1	None
AT3G58610			ketol-acid reductoisomerase(source:Araport11)	AT3G58610.3	None
AT3G58610			ketol-acid reductoisomerase(source:Araport11)	AT3G58610_ID9	None
AT3G58610			ketol-acid reductoisomerase(source:Araport11)	AT3G58610_P1	None
AT3G58610			ketol-acid reductoisomerase(source:Araport11)	AT3G58610_ID7	None
AT3G63370	ORGANELLE TRANSCRIPT PROCESSING 86 (OTP86)	ORGANELLE TRANSCRIPT PROCESSING 86 (OTP86)	Encodes a chloroplast RNA editing factor.	AT3G63370_c2	None
AT3G63370	ORGANELLE TRANSCRIPT PROCESSING 86 (OTP86)	ORGANELLE TRANSCRIPT PROCESSING 86 (OTP86)	Encodes a chloroplast RNA editing factor.	AT3G63370.1	None
AT3G63370	ORGANELLE TRANSCRIPT PROCESSING 86 (OTP86)	ORGANELLE TRANSCRIPT PROCESSING 86 (OTP86)	Encodes a chloroplast RNA editing factor.	AT3G63370_c1	None
AT3G63370	ORGANELLE TRANSCRIPT PROCESSING 86 (OTP86)	ORGANELLE TRANSCRIPT PROCESSING 86 (OTP86)	Encodes a chloroplast RNA editing factor.	AT3G63370_s1	None
AT3G63370	ORGANELLE TRANSCRIPT PROCESSING 86 (OTP86)	ORGANELLE TRANSCRIPT PROCESSING 86 (OTP86)	Encodes a chloroplast RNA editing factor.	AT3G63370_P1	None
AT3G63370	ORGANELLE TRANSCRIPT PROCESSING 86 (OTP86)	ORGANELLE TRANSCRIPT PROCESSING 86 (OTP86)	Encodes a chloroplast RNA editing factor.	AT3G63370_c3	None
AT4G25910	NFU DOMAIN PROTEIN 3 (NFU3)	(AtCNFU3)NFU DOMAIN PROTEIN 3 (NFU3)	Encodes a protein containing the NFU domain that may be involved in iron-sulfur cluster assembly. Part of a five member gene family, more closely related to NFU1 and 2 than to NFU4 and 5. Targeted to the chloroplast. The mRNA is cell-to-cell mobile.	AT4G25910_ID4	PTC
AT4G25910	NFU DOMAIN PROTEIN 3 (NFU3)	(AtCNFU3)NFU DOMAIN PROTEIN 3 (NFU3)	Encodes a protein containing the NFU domain that may be involved in iron-sulfur cluster assembly. Part of a five member gene family, more closely related to NFU1 and 2 than to NFU4 and 5. Targeted to the chloroplast. The mRNA is cell-to-cell mobile.	AT4G25910_ID1	None
AT4G25910	NFU DOMAIN PROTEIN 3 (NFU3)	(AtCNFU3)NFU DOMAIN PROTEIN 3 (NFU3)	Encodes a protein containing the NFU domain that may be involved in iron-sulfur cluster assembly. Part of a five member gene family, more closely related to NFU1 and 2 than to NFU4 and 5. Targeted to the chloroplast. The mRNA is cell-to-cell mobile.	AT4G25910_s1	PTC
AT4G25910	NFU DOMAIN PROTEIN 3 (NFU3)	(AtCNFU3)NFU DOMAIN PROTEIN 3 (NFU3)	Encodes a protein containing the NFU domain that may be involved in iron-sulfur cluster assembly. Part of a five member gene family, more closely related to NFU1 and 2 than to NFU4 and 5. Targeted to the chloroplast. The mRNA is cell-to-cell mobile.	AT4G25910_ID3	PTC
AT4G25910	NFU DOMAIN PROTEIN 3 (NFU3)	(AtCNFU3)NFU DOMAIN PROTEIN 3 (NFU3)	Encodes a protein containing the NFU domain that may be involved in iron-sulfur cluster assembly. Part of a five member gene family, more closely related to NFU1 and 2 than to NFU4 and 5. Targeted to the chloroplast. The mRNA is cell-to-cell mobile.	AT4G25910_P1	None
AT4G27440	PROTOCHLOROPHYLLIDE OXIDOREDUCTASE B (PORB)	PROTOCHLOROPHYLLIDE OXIDOREDUCTASE B (PORB)	light-dependent NADPH:protochlorophyllide oxidoreductase B The mRNA is cell-to-cell mobile.	AT4G27440.1	None
AT4G27440	PROTOCHLOROPHYLLIDE OXIDOREDUCTASE B (PORB)	PROTOCHLOROPHYLLIDE OXIDOREDUCTASE B (PORB)	light-dependent NADPH:protochlorophyllide oxidoreductase B The mRNA is cell-to-cell mobile.	AT4G27440.2	None
AT4G29060	EMBRYO DEFECTIVE 2726 (emb2726)	EMBRYO DEFECTIVE 2726 (emb2726)	Involved in chloroplast biogenesis and early embryo development. May function as an EF-Ts to regulate plastid translation.	AT4G29060_ID85	None
AT4G29060	EMBRYO DEFECTIVE 2726 (emb2726)	EMBRYO DEFECTIVE 2726 (emb2726)	Involved in chloroplast biogenesis and early embryo development. May function as an EF-Ts to regulate plastid translation.	AT4G29060.2	None
AT4G29060	EMBRYO DEFECTIVE 2726 (emb2726)	EMBRYO DEFECTIVE 2726 (emb2726)	Involved in chloroplast biogenesis and early embryo development. May function as an EF-Ts to regulate plastid translation.	AT4G29060_ID84	None
AT4G29060	EMBRYO DEFECTIVE 2726 (emb2726)	EMBRYO DEFECTIVE 2726 (emb2726)	Involved in chloroplast biogenesis and early embryo development. May function as an EF-Ts to regulate plastid translation.	AT4G29060_ID60	None
AT4G29060	EMBRYO DEFECTIVE 2726 (emb2726)	EMBRYO DEFECTIVE 2726 (emb2726)	Involved in chloroplast biogenesis and early embryo development. May function as an EF-Ts to regulate plastid translation.	AT4G29060_ID67	None
AT4G29060	EMBRYO DEFECTIVE 2726 (emb2726)	EMBRYO DEFECTIVE 2726 (emb2726)	Involved in chloroplast biogenesis and early embryo development. May function as an EF-Ts to regulate plastid translation.	AT4G29060_c2	None
AT4G29060	EMBRYO DEFECTIVE 2726 (emb2726)	EMBRYO DEFECTIVE 2726 (emb2726)	Involved in chloroplast biogenesis and early embryo development. May function as an EF-Ts to regulate plastid translation.	AT4G29060_P1	None
AT4G29060	EMBRYO DEFECTIVE 2726 (emb2726)	EMBRYO DEFECTIVE 2726 (emb2726)	Involved in chloroplast biogenesis and early embryo development. May function as an EF-Ts to regulate plastid translation.	AT4G29060_ID66	PTC
AT4G33520	P-TYPE ATP-ASE 1 (PAA1)	P-TYPE ATP-ASE 1 (PAA1)HEAVY METAL ATPASE 6 (HMA6)HEAVY METAL ASSOCIATED PROTEIN 38 (ATHMP38)PLASTID CHAPERON 1 (PCH1)ARABIDOPSIS THALIANA HEAVY METAL ATPASE 6 (AtHMAC6)	Encodes a putative metal-transporting P-type ATPase PAA1. An alternative-splicing event of the PAA1 pre-mRNA produces a copper chaperon named PCH1. The mRNA is cell-to-cell mobile.	AT4G33520.3	None
AT4G33520	P-TYPE ATP-ASE 1 (PAA1)	P-TYPE ATP-ASE 1 (PAA1)HEAVY METAL ATPASE 6 (HMA6)HEAVY METAL ASSOCIATED PROTEIN 38 (ATHMP38)PLASTID CHAPERON 1 (PCH1)ARABIDOPSIS THALIANA HEAVY METAL ATPASE 6 (AtHMAC6)	Encodes a putative metal-transporting P-type ATPase PAA1. An alternative-splicing event of the PAA1 pre-mRNA produces a copper chaperon named PCH1. The mRNA is cell-to-cell mobile.	AT4G33520_P2	None
AT4G33520	P-TYPE ATP-ASE 1 (PAA1)	P-TYPE ATP-ASE 1 (PAA1)HEAVY METAL ATPASE 6 (HMA6)HEAVY METAL ASSOCIATED PROTEIN 38 (ATHMP38)PLASTID CHAPERON 1 (PCH1)ARABIDOPSIS THALIANA HEAVY METAL ATPASE 6 (AtHMAC6)	Encodes a putative metal-transporting P-type ATPase PAA1. An alternative-splicing event of the PAA1 pre-mRNA produces a copper chaperon named PCH1. The mRNA is cell-to-cell mobile.	AT4G33520_JC7	PTC
AT4G33580	BETA CARBONIC ANHYDRASE 5 (BCA5)	BETA CARBONIC ANHYDRASE 5 (BCA5)A. THALIANA BETA CARBONIC ANHYDRASE 5 (ATBCA5)	beta carbonic anhydrase 5(source:Araport11)	AT4G33580.2	None
AT4G33580	BETA CARBONIC ANHYDRASE 5 (BCA5)	BETA CARBONIC ANHYDRASE 5 (BCA5)A. THALIANA BETA CARBONIC ANHYDRASE 5 (ATBCA5)	beta carbonic anhydrase 5(source:Araport11)	AT4G33580_ID5	PTC
AT4G33580	BETA CARBONIC ANHYDRASE 5 (BCA5)	BETA CARBONIC ANHYDRASE 5 (BCA5)A. THALIANA BETA CARBONIC ANHYDRASE 5 (ATBCA5)	beta carbonic anhydrase 5(source:Araport11)	AT4G33580_P1	None
AT4G33580	BETA CARBONIC ANHYDRASE 5 (BCA5)	BETA CARBONIC ANHYDRASE 5 (BCA5)A. THALIANA BETA CARBONIC ANHYDRASE 5 (ATBCA5)	beta carbonic anhydrase 5(source:Araport11)	AT4G33580_ID10	PTC
AT4G33580	BETA CARBONIC ANHYDRASE 5 (BCA5)	BETA CARBONIC ANHYDRASE 5 (BCA5)A. THALIANA BETA CARBONIC ANHYDRASE 5 (ATBCA5)	beta carbonic anhydrase 5(source:Araport11)	AT4G33580_ID7	None
AT4G33580	BETA CARBONIC ANHYDRASE 5 (BCA5)	BETA CARBONIC ANHYDRASE 5 (BCA5)A. THALIANA BETA CARBONIC ANHYDRASE 5 (ATBCA5)	beta carbonic anhydrase 5(source:Araport11)	AT4G33580_ID3	None
AT4G33580	BETA CARBONIC ANHYDRASE 5 (BCA5)	BETA CARBONIC ANHYDRASE 5 (BCA5)A. THALIANA BETA CARBONIC ANHYDRASE 5 (ATBCA5)	beta carbonic anhydrase 5(source:Araport11)	AT4G33580_JS12	None
AT4G33580	BETA CARBONIC ANHYDRASE 5 (BCA5)	BETA CARBONIC ANHYDRASE 5 (BCA5)A. THALIANA BETA CARBONIC ANHYDRASE 5 (ATBCA5)	beta carbonic anhydrase 5(source:Araport11)	AT4G33580_JC19	None
AT4G35770	SENESCENCE 1 (SEN1)	SENESCENCE-ASSOCIATED GENE 1 (SAG1)SENESCENCE 1 (SEN1) (SAG1)ARABIDOPSIS THALIANA SENESCENCE 1 (ATSEN1)DARK INDUCIBLE 1 (DIN1)SENESCENCE ASSOCIATED GENE 1 (SEN1)	Senescence-associated gene that is strongly induced by phosphate starvation. Transcripts are differentially regulated at the level of mRNA stability at different times of day. mRNAs are targets of the mRNA degradation pathway mediated by the downstream (DST) instability determinant.	AT4G35770_c2	None
AT4G35770	SENESCENCE 1 (SEN1)	SENESCENCE-ASSOCIATED GENE 1 (SAG1)SENESCENCE 1 (SEN1) (SAG1)ARABIDOPSIS THALIANA SENESCENCE 1 (ATSEN1)DARK INDUCIBLE 1 (DIN1)SENESCENCE ASSOCIATED GENE 1 (SEN1)	Senescence-associated gene that is strongly induced by phosphate starvation. Transcripts are differentially regulated at the level of mRNA stability at different times of day. mRNAs are targets of the mRNA degradation pathway mediated by the downstream (DST) instability determinant.	AT4G35770_c1	None
AT4G35770	SENESCENCE 1 (SEN1)	SENESCENCE-ASSOCIATED GENE 1 (SAG1)SENESCENCE 1 (SEN1) (SAG1)ARABIDOPSIS THALIANA SENESCENCE 1 (ATSEN1)DARK INDUCIBLE 1 (DIN1)SENESCENCE ASSOCIATED GENE 1 (SEN1)	Senescence-associated gene that is strongly induced by phosphate starvation. Transcripts are differentially regulated at the level of mRNA stability at different times of day. mRNAs are targets of the mRNA degradation pathway mediated by the downstream (DST) instability determinant.	AT4G35770_P1	None
AT4G35770	SENESCENCE 1 (SEN1)	SENESCENCE-ASSOCIATED GENE 1 (SAG1)SENESCENCE 1 (SEN1) (SAG1)ARABIDOPSIS THALIANA SENESCENCE 1 (ATSEN1)DARK INDUCIBLE 1 (DIN1)SENESCENCE ASSOCIATED GENE 1 (SEN1)	Senescence-associated gene that is strongly induced by phosphate starvation. Transcripts are differentially regulated at the level of mRNA stability at different times of day. mRNAs are targets of the mRNA degradation pathway mediated by the downstream (DST) instability determinant.	AT4G35770_P2	None
AT4G35770	SENESCENCE 1 (SEN1)	SENESCENCE-ASSOCIATED GENE 1 (SAG1)SENESCENCE 1 (SEN1) (SAG1)ARABIDOPSIS THALIANA SENESCENCE 1 (ATSEN1)DARK INDUCIBLE 1 (DIN1)SENESCENCE ASSOCIATED GENE 1 (SEN1)	Senescence-associated gene that is strongly induced by phosphate starvation. Transcripts are differentially regulated at the level of mRNA stability at different times of day. mRNAs are targets of the mRNA degradation pathway mediated by the downstream (DST) instability determinant.	AT4G35770.3	None
AT4G35770	SENESCENCE 1 (SEN1)	SENESCENCE-ASSOCIATED GENE 1 (SAG1)SENESCENCE 1 (SEN1) (SAG1)ARABIDOPSIS THALIANA SENESCENCE 1 (ATSEN1)DARK INDUCIBLE 1 (DIN1)SENESCENCE ASSOCIATED GENE 1 (SEN1)	Senescence-associated gene that is strongly induced by phosphate starvation. Transcripts are differentially regulated at the level of mRNA stability at different times of day. mRNAs are targets of the mRNA degradation pathway mediated by the downstream (DST) instability determinant.	AT4G35770_P6	PTC
AT4G35770	SENESCENCE 1 (SEN1)	SENESCENCE-ASSOCIATED GENE 1 (SAG1)SENESCENCE 1 (SEN1) (SAG1)ARABIDOPSIS THALIANA SENESCENCE 1 (ATSEN1)DARK INDUCIBLE 1 (DIN1)SENESCENCE ASSOCIATED GENE 1 (SEN1)	Senescence-associated gene that is strongly induced by phosphate starvation. Transcripts are differentially regulated at the level of mRNA stability at different times of day. mRNAs are targets of the mRNA degradation pathway mediated by the downstream (DST) instability determinant.	AT4G35770_P4	PTC
AT4G35770	SENESCENCE 1 (SEN1)	SENESCENCE-ASSOCIATED GENE 1 (SAG1)SENESCENCE 1 (SEN1) (SAG1)ARABIDOPSIS THALIANA SENESCENCE 1 (ATSEN1)DARK INDUCIBLE 1 (DIN1)SENESCENCE ASSOCIATED GENE 1 (SEN1)	Senescence-associated gene that is strongly induced by phosphate starvation. Transcripts are differentially regulated at the level of mRNA stability at different times of day. mRNAs are targets of the mRNA degradation pathway mediated by the downstream (DST) instability determinant.	AT4G35770_P5	None
AT4G38380			MATE efflux family protein(source:Araport11)	AT4G38380_P1	None
AT4G38380			MATE efflux family protein(source:Araport11)	AT4G38380_JS2	None
AT4G38380			MATE efflux family protein(source:Araport11)	AT4G38380_P4	PTC
AT4G38380			MATE efflux family protein(source:Araport11)	AT4G38380_P5	None
AT4G38380			MATE efflux family protein(source:Araport11)	AT4G38380_P3	PTC
AT4G38380			MATE efflux family protein(source:Araport11)	AT4G38380_P2	None
AT4G38380			MATE efflux family protein(source:Araport11)	AT4G38380_JC5	None
AT4G38380			MATE efflux family protein(source:Araport11)	AT4G38380_ID1	PTC
AT5G04140	GLUTAMATE SYNTHASE 1 (GLU1)	GLUTAMATE SYNTHASE 1 (GLU1)FERREDOXIN-DEPENDENT GLUTAMATE SYNTHASE (FD-GOGAT) (GLUS)FERREDOXIN-DEPENDENT GLUTAMATE SYNTHASE 1 (GLS1)	Encodes a gene whose sequence is similar to ferredoxin dependent glutamate synthase (Fd-GOGAT). Expression in leaves is induced by light and sucrose. Proposed to be involved in photorespiration and nitrogen assimilation. The mRNA is cell-to-cell mobile.	AT5G04140.2	None
AT5G04140	GLUTAMATE SYNTHASE 1 (GLU1)	GLUTAMATE SYNTHASE 1 (GLU1)FERREDOXIN-DEPENDENT GLUTAMATE SYNTHASE (FD-GOGAT) (GLUS)FERREDOXIN-DEPENDENT GLUTAMATE SYNTHASE 1 (GLS1)	Encodes a gene whose sequence is similar to ferredoxin dependent glutamate synthase (Fd-GOGAT). Expression in leaves is induced by light and sucrose. Proposed to be involved in photorespiration and nitrogen assimilation. The mRNA is cell-to-cell mobile.	AT5G04140_s2	None
AT5G04140	GLUTAMATE SYNTHASE 1 (GLU1)	GLUTAMATE SYNTHASE 1 (GLU1)FERREDOXIN-DEPENDENT GLUTAMATE SYNTHASE (FD-GOGAT) (GLUS)FERREDOXIN-DEPENDENT GLUTAMATE SYNTHASE 1 (GLS1)	Encodes a gene whose sequence is similar to ferredoxin dependent glutamate synthase (Fd-GOGAT). Expression in leaves is induced by light and sucrose. Proposed to be involved in photorespiration and nitrogen assimilation. The mRNA is cell-to-cell mobile.	AT5G04140_s3	PTC
AT5G04140	GLUTAMATE SYNTHASE 1 (GLU1)	GLUTAMATE SYNTHASE 1 (GLU1)FERREDOXIN-DEPENDENT GLUTAMATE SYNTHASE (FD-GOGAT) (GLUS)FERREDOXIN-DEPENDENT GLUTAMATE SYNTHASE 1 (GLS1)	Encodes a gene whose sequence is similar to ferredoxin dependent glutamate synthase (Fd-GOGAT). Expression in leaves is induced by light and sucrose. Proposed to be involved in photorespiration and nitrogen assimilation. The mRNA is cell-to-cell mobile.	AT5G04140_P1	None
AT5G04140	GLUTAMATE SYNTHASE 1 (GLU1)	GLUTAMATE SYNTHASE 1 (GLU1)FERREDOXIN-DEPENDENT GLUTAMATE SYNTHASE (FD-GOGAT) (GLUS)FERREDOXIN-DEPENDENT GLUTAMATE SYNTHASE 1 (GLS1)	Encodes a gene whose sequence is similar to ferredoxin dependent glutamate synthase (Fd-GOGAT). Expression in leaves is induced by light and sucrose. Proposed to be involved in photorespiration and nitrogen assimilation. The mRNA is cell-to-cell mobile.	AT5G04140_s1	None
AT5G04360	LIMIT DEXTRINASE (LDA)	PULLULANASE 1 (ATPU1)LIMIT DEXTRINASE (LDA)PULLULANASE 1 (PU1)LIMIT DEXTRINASE (ATLDA)	Encodes an enzyme thought to be involved in the hydrolysis of the alpha-1,6 linkages during starch degradation in seed endosperm. However, a knockout mutant of Arabidopsis lacking limit dextrinase has normal rates of starch degradation in the leaf at night, indicating that more than one isoamylases might be involved in this process.	AT5G04360_c1	PTC
AT5G04360	LIMIT DEXTRINASE (LDA)	PULLULANASE 1 (ATPU1)LIMIT DEXTRINASE (LDA)PULLULANASE 1 (PU1)LIMIT DEXTRINASE (ATLDA)	Encodes an enzyme thought to be involved in the hydrolysis of the alpha-1,6 linkages during starch degradation in seed endosperm. However, a knockout mutant of Arabidopsis lacking limit dextrinase has normal rates of starch degradation in the leaf at night, indicating that more than one isoamylases might be involved in this process.	AT5G04360_JS14	PTC
AT5G04360	LIMIT DEXTRINASE (LDA)	PULLULANASE 1 (ATPU1)LIMIT DEXTRINASE (LDA)PULLULANASE 1 (PU1)LIMIT DEXTRINASE (ATLDA)	Encodes an enzyme thought to be involved in the hydrolysis of the alpha-1,6 linkages during starch degradation in seed endosperm. However, a knockout mutant of Arabidopsis lacking limit dextrinase has normal rates of starch degradation in the leaf at night, indicating that more than one isoamylases might be involved in this process.	AT5G04360_ID3	PTC
AT5G04360	LIMIT DEXTRINASE (LDA)	PULLULANASE 1 (ATPU1)LIMIT DEXTRINASE (LDA)PULLULANASE 1 (PU1)LIMIT DEXTRINASE (ATLDA)	Encodes an enzyme thought to be involved in the hydrolysis of the alpha-1,6 linkages during starch degradation in seed endosperm. However, a knockout mutant of Arabidopsis lacking limit dextrinase has normal rates of starch degradation in the leaf at night, indicating that more than one isoamylases might be involved in this process.	AT5G04360_JS11	PTC
AT5G04360	LIMIT DEXTRINASE (LDA)	PULLULANASE 1 (ATPU1)LIMIT DEXTRINASE (LDA)PULLULANASE 1 (PU1)LIMIT DEXTRINASE (ATLDA)	Encodes an enzyme thought to be involved in the hydrolysis of the alpha-1,6 linkages during starch degradation in seed endosperm. However, a knockout mutant of Arabidopsis lacking limit dextrinase has normal rates of starch degradation in the leaf at night, indicating that more than one isoamylases might be involved in this process.	AT5G04360_ID4	PTC
AT5G04360	LIMIT DEXTRINASE (LDA)	PULLULANASE 1 (ATPU1)LIMIT DEXTRINASE (LDA)PULLULANASE 1 (PU1)LIMIT DEXTRINASE (ATLDA)	Encodes an enzyme thought to be involved in the hydrolysis of the alpha-1,6 linkages during starch degradation in seed endosperm. However, a knockout mutant of Arabidopsis lacking limit dextrinase has normal rates of starch degradation in the leaf at night, indicating that more than one isoamylases might be involved in this process.	AT5G04360_ID20	PTC
AT5G04360	LIMIT DEXTRINASE (LDA)	PULLULANASE 1 (ATPU1)LIMIT DEXTRINASE (LDA)PULLULANASE 1 (PU1)LIMIT DEXTRINASE (ATLDA)	Encodes an enzyme thought to be involved in the hydrolysis of the alpha-1,6 linkages during starch degradation in seed endosperm. However, a knockout mutant of Arabidopsis lacking limit dextrinase has normal rates of starch degradation in the leaf at night, indicating that more than one isoamylases might be involved in this process.	AT5G04360_JC4	PTC
AT5G04360	LIMIT DEXTRINASE (LDA)	PULLULANASE 1 (ATPU1)LIMIT DEXTRINASE (LDA)PULLULANASE 1 (PU1)LIMIT DEXTRINASE (ATLDA)	Encodes an enzyme thought to be involved in the hydrolysis of the alpha-1,6 linkages during starch degradation in seed endosperm. However, a knockout mutant of Arabidopsis lacking limit dextrinase has normal rates of starch degradation in the leaf at night, indicating that more than one isoamylases might be involved in this process.	AT5G04360_JS13	PTC
AT5G04360	LIMIT DEXTRINASE (LDA)	PULLULANASE 1 (ATPU1)LIMIT DEXTRINASE (LDA)PULLULANASE 1 (PU1)LIMIT DEXTRINASE (ATLDA)	Encodes an enzyme thought to be involved in the hydrolysis of the alpha-1,6 linkages during starch degradation in seed endosperm. However, a knockout mutant of Arabidopsis lacking limit dextrinase has normal rates of starch degradation in the leaf at night, indicating that more than one isoamylases might be involved in this process.	AT5G04360_c4	PTC
AT5G04360	LIMIT DEXTRINASE (LDA)	PULLULANASE 1 (ATPU1)LIMIT DEXTRINASE (LDA)PULLULANASE 1 (PU1)LIMIT DEXTRINASE (ATLDA)	Encodes an enzyme thought to be involved in the hydrolysis of the alpha-1,6 linkages during starch degradation in seed endosperm. However, a knockout mutant of Arabidopsis lacking limit dextrinase has normal rates of starch degradation in the leaf at night, indicating that more than one isoamylases might be involved in this process.	AT5G04360_JC22	PTC
AT5G04360	LIMIT DEXTRINASE (LDA)	PULLULANASE 1 (ATPU1)LIMIT DEXTRINASE (LDA)PULLULANASE 1 (PU1)LIMIT DEXTRINASE (ATLDA)	Encodes an enzyme thought to be involved in the hydrolysis of the alpha-1,6 linkages during starch degradation in seed endosperm. However, a knockout mutant of Arabidopsis lacking limit dextrinase has normal rates of starch degradation in the leaf at night, indicating that more than one isoamylases might be involved in this process.	AT5G04360_ID7	PTC
AT5G04360	LIMIT DEXTRINASE (LDA)	PULLULANASE 1 (ATPU1)LIMIT DEXTRINASE (LDA)PULLULANASE 1 (PU1)LIMIT DEXTRINASE (ATLDA)	Encodes an enzyme thought to be involved in the hydrolysis of the alpha-1,6 linkages during starch degradation in seed endosperm. However, a knockout mutant of Arabidopsis lacking limit dextrinase has normal rates of starch degradation in the leaf at night, indicating that more than one isoamylases might be involved in this process.	AT5G04360_JS17	PTC
AT5G04360	LIMIT DEXTRINASE (LDA)	PULLULANASE 1 (ATPU1)LIMIT DEXTRINASE (LDA)PULLULANASE 1 (PU1)LIMIT DEXTRINASE (ATLDA)	Encodes an enzyme thought to be involved in the hydrolysis of the alpha-1,6 linkages during starch degradation in seed endosperm. However, a knockout mutant of Arabidopsis lacking limit dextrinase has normal rates of starch degradation in the leaf at night, indicating that more than one isoamylases might be involved in this process.	AT5G04360_JS18	PTC
AT5G04360	LIMIT DEXTRINASE (LDA)	PULLULANASE 1 (ATPU1)LIMIT DEXTRINASE (LDA)PULLULANASE 1 (PU1)LIMIT DEXTRINASE (ATLDA)	Encodes an enzyme thought to be involved in the hydrolysis of the alpha-1,6 linkages during starch degradation in seed endosperm. However, a knockout mutant of Arabidopsis lacking limit dextrinase has normal rates of starch degradation in the leaf at night, indicating that more than one isoamylases might be involved in this process.	AT5G04360_JC20	PTC
AT5G04360	LIMIT DEXTRINASE (LDA)	PULLULANASE 1 (ATPU1)LIMIT DEXTRINASE (LDA)PULLULANASE 1 (PU1)LIMIT DEXTRINASE (ATLDA)	Encodes an enzyme thought to be involved in the hydrolysis of the alpha-1,6 linkages during starch degradation in seed endosperm. However, a knockout mutant of Arabidopsis lacking limit dextrinase has normal rates of starch degradation in the leaf at night, indicating that more than one isoamylases might be involved in this process.	AT5G04360_JC1	PTC
AT5G04360	LIMIT DEXTRINASE (LDA)	PULLULANASE 1 (ATPU1)LIMIT DEXTRINASE (LDA)PULLULANASE 1 (PU1)LIMIT DEXTRINASE (ATLDA)	Encodes an enzyme thought to be involved in the hydrolysis of the alpha-1,6 linkages during starch degradation in seed endosperm. However, a knockout mutant of Arabidopsis lacking limit dextrinase has normal rates of starch degradation in the leaf at night, indicating that more than one isoamylases might be involved in this process.	AT5G04360_ID16	PTC
AT5G04360	LIMIT DEXTRINASE (LDA)	PULLULANASE 1 (ATPU1)LIMIT DEXTRINASE (LDA)PULLULANASE 1 (PU1)LIMIT DEXTRINASE (ATLDA)	Encodes an enzyme thought to be involved in the hydrolysis of the alpha-1,6 linkages during starch degradation in seed endosperm. However, a knockout mutant of Arabidopsis lacking limit dextrinase has normal rates of starch degradation in the leaf at night, indicating that more than one isoamylases might be involved in this process.	AT5G04360_JC5	PTC
AT5G04360	LIMIT DEXTRINASE (LDA)	PULLULANASE 1 (ATPU1)LIMIT DEXTRINASE (LDA)PULLULANASE 1 (PU1)LIMIT DEXTRINASE (ATLDA)	Encodes an enzyme thought to be involved in the hydrolysis of the alpha-1,6 linkages during starch degradation in seed endosperm. However, a knockout mutant of Arabidopsis lacking limit dextrinase has normal rates of starch degradation in the leaf at night, indicating that more than one isoamylases might be involved in this process.	AT5G04360_c3	PTC
AT5G04360	LIMIT DEXTRINASE (LDA)	PULLULANASE 1 (ATPU1)LIMIT DEXTRINASE (LDA)PULLULANASE 1 (PU1)LIMIT DEXTRINASE (ATLDA)	Encodes an enzyme thought to be involved in the hydrolysis of the alpha-1,6 linkages during starch degradation in seed endosperm. However, a knockout mutant of Arabidopsis lacking limit dextrinase has normal rates of starch degradation in the leaf at night, indicating that more than one isoamylases might be involved in this process.	AT5G04360_JC2	PTC
AT5G04360	LIMIT DEXTRINASE (LDA)	PULLULANASE 1 (ATPU1)LIMIT DEXTRINASE (LDA)PULLULANASE 1 (PU1)LIMIT DEXTRINASE (ATLDA)	Encodes an enzyme thought to be involved in the hydrolysis of the alpha-1,6 linkages during starch degradation in seed endosperm. However, a knockout mutant of Arabidopsis lacking limit dextrinase has normal rates of starch degradation in the leaf at night, indicating that more than one isoamylases might be involved in this process.	AT5G04360_P1	None
AT5G04360	LIMIT DEXTRINASE (LDA)	PULLULANASE 1 (ATPU1)LIMIT DEXTRINASE (LDA)PULLULANASE 1 (PU1)LIMIT DEXTRINASE (ATLDA)	Encodes an enzyme thought to be involved in the hydrolysis of the alpha-1,6 linkages during starch degradation in seed endosperm. However, a knockout mutant of Arabidopsis lacking limit dextrinase has normal rates of starch degradation in the leaf at night, indicating that more than one isoamylases might be involved in this process.	AT5G04360_ID12	None
AT5G04360	LIMIT DEXTRINASE (LDA)	PULLULANASE 1 (ATPU1)LIMIT DEXTRINASE (LDA)PULLULANASE 1 (PU1)LIMIT DEXTRINASE (ATLDA)	Encodes an enzyme thought to be involved in the hydrolysis of the alpha-1,6 linkages during starch degradation in seed endosperm. However, a knockout mutant of Arabidopsis lacking limit dextrinase has normal rates of starch degradation in the leaf at night, indicating that more than one isoamylases might be involved in this process.	AT5G04360_JC15	PTC
AT5G04360	LIMIT DEXTRINASE (LDA)	PULLULANASE 1 (ATPU1)LIMIT DEXTRINASE (LDA)PULLULANASE 1 (PU1)LIMIT DEXTRINASE (ATLDA)	Encodes an enzyme thought to be involved in the hydrolysis of the alpha-1,6 linkages during starch degradation in seed endosperm. However, a knockout mutant of Arabidopsis lacking limit dextrinase has normal rates of starch degradation in the leaf at night, indicating that more than one isoamylases might be involved in this process.	AT5G04360_P2	None
AT5G04360	LIMIT DEXTRINASE (LDA)	PULLULANASE 1 (ATPU1)LIMIT DEXTRINASE (LDA)PULLULANASE 1 (PU1)LIMIT DEXTRINASE (ATLDA)	Encodes an enzyme thought to be involved in the hydrolysis of the alpha-1,6 linkages during starch degradation in seed endosperm. However, a knockout mutant of Arabidopsis lacking limit dextrinase has normal rates of starch degradation in the leaf at night, indicating that more than one isoamylases might be involved in this process.	AT5G04360_JS19	PTC
AT5G04360	LIMIT DEXTRINASE (LDA)	PULLULANASE 1 (ATPU1)LIMIT DEXTRINASE (LDA)PULLULANASE 1 (PU1)LIMIT DEXTRINASE (ATLDA)	Encodes an enzyme thought to be involved in the hydrolysis of the alpha-1,6 linkages during starch degradation in seed endosperm. However, a knockout mutant of Arabidopsis lacking limit dextrinase has normal rates of starch degradation in the leaf at night, indicating that more than one isoamylases might be involved in this process.	AT5G04360_ID11	None
AT5G04360	LIMIT DEXTRINASE (LDA)	PULLULANASE 1 (ATPU1)LIMIT DEXTRINASE (LDA)PULLULANASE 1 (PU1)LIMIT DEXTRINASE (ATLDA)	Encodes an enzyme thought to be involved in the hydrolysis of the alpha-1,6 linkages during starch degradation in seed endosperm. However, a knockout mutant of Arabidopsis lacking limit dextrinase has normal rates of starch degradation in the leaf at night, indicating that more than one isoamylases might be involved in this process.	AT5G04360_JC11	PTC
AT5G09820	FIBRILLIN5 (FBN5)	FIBRILLIN5 (FBN5)	Encodes fibrillin 5 (FBN5). Located in chloroplast stroma. Essential for plastoquinone-9 biosynthesis. Stimulates enzymatic activity of solanesyl diphosphate synthases (SPS) 1 and 2 through binding to solanesyl moiety. Two splicing variants, named FBN5-A shorter one and FBN5-B longer one. FBN5-B is the protein detected in chloroplast stroma. Involved in plastoquinone biosynthesis.	AT5G09820_P1	None
AT5G09820	FIBRILLIN5 (FBN5)	FIBRILLIN5 (FBN5)	Encodes fibrillin 5 (FBN5). Located in chloroplast stroma. Essential for plastoquinone-9 biosynthesis. Stimulates enzymatic activity of solanesyl diphosphate synthases (SPS) 1 and 2 through binding to solanesyl moiety. Two splicing variants, named FBN5-A shorter one and FBN5-B longer one. FBN5-B is the protein detected in chloroplast stroma. Involved in plastoquinone biosynthesis.	AT5G09820_s1	PTC
AT5G09820	FIBRILLIN5 (FBN5)	FIBRILLIN5 (FBN5)	Encodes fibrillin 5 (FBN5). Located in chloroplast stroma. Essential for plastoquinone-9 biosynthesis. Stimulates enzymatic activity of solanesyl diphosphate synthases (SPS) 1 and 2 through binding to solanesyl moiety. Two splicing variants, named FBN5-A shorter one and FBN5-B longer one. FBN5-B is the protein detected in chloroplast stroma. Involved in plastoquinone biosynthesis.	AT5G09820_P2	None
AT5G09820	FIBRILLIN5 (FBN5)	FIBRILLIN5 (FBN5)	Encodes fibrillin 5 (FBN5). Located in chloroplast stroma. Essential for plastoquinone-9 biosynthesis. Stimulates enzymatic activity of solanesyl diphosphate synthases (SPS) 1 and 2 through binding to solanesyl moiety. Two splicing variants, named FBN5-A shorter one and FBN5-B longer one. FBN5-B is the protein detected in chloroplast stroma. Involved in plastoquinone biosynthesis.	AT5G09820_ID9	PTC
AT5G09820	FIBRILLIN5 (FBN5)	FIBRILLIN5 (FBN5)	Encodes fibrillin 5 (FBN5). Located in chloroplast stroma. Essential for plastoquinone-9 biosynthesis. Stimulates enzymatic activity of solanesyl diphosphate synthases (SPS) 1 and 2 through binding to solanesyl moiety. Two splicing variants, named FBN5-A shorter one and FBN5-B longer one. FBN5-B is the protein detected in chloroplast stroma. Involved in plastoquinone biosynthesis.	AT5G09820_c1	None
AT5G09820	FIBRILLIN5 (FBN5)	FIBRILLIN5 (FBN5)	Encodes fibrillin 5 (FBN5). Located in chloroplast stroma. Essential for plastoquinone-9 biosynthesis. Stimulates enzymatic activity of solanesyl diphosphate synthases (SPS) 1 and 2 through binding to solanesyl moiety. Two splicing variants, named FBN5-A shorter one and FBN5-B longer one. FBN5-B is the protein detected in chloroplast stroma. Involved in plastoquinone biosynthesis.	AT5G09820_P3	None
AT5G12040			Nitrilase/cyanide hydratase and apolipoprotein N-acyltransferase family protein(source:Araport11)	AT5G12040_P1	None
AT5G12040			Nitrilase/cyanide hydratase and apolipoprotein N-acyltransferase family protein(source:Araport11)	AT5G12040.2	None
AT5G12040			Nitrilase/cyanide hydratase and apolipoprotein N-acyltransferase family protein(source:Araport11)	AT5G12040_c1	None
AT5G13410			FKBP-like peptidyl-prolyl cis-trans isomerase family protein(source:Araport11)	AT5G13410_P1	None
AT5G13410			FKBP-like peptidyl-prolyl cis-trans isomerase family protein(source:Araport11)	AT5G13410_P2	None
AT5G13410			FKBP-like peptidyl-prolyl cis-trans isomerase family protein(source:Araport11)	AT5G13410_P3	None
AT5G20980	METHIONINE SYNTHASE 3 (MS3)	METHIONINE SYNTHASE 3 (MS3)METHIONINE SYNTHASE 3 (ATMS3)	Encodes a plastidic methionine synthase, involved in methionine de novo synthesis in the chloroplast	AT5G20980_JS3	None
AT5G20980	METHIONINE SYNTHASE 3 (MS3)	METHIONINE SYNTHASE 3 (MS3)METHIONINE SYNTHASE 3 (ATMS3)	Encodes a plastidic methionine synthase, involved in methionine de novo synthesis in the chloroplast	AT5G20980.2	None
AT5G20980	METHIONINE SYNTHASE 3 (MS3)	METHIONINE SYNTHASE 3 (MS3)METHIONINE SYNTHASE 3 (ATMS3)	Encodes a plastidic methionine synthase, involved in methionine de novo synthesis in the chloroplast	AT5G20980_P1	None
AT5G20980	METHIONINE SYNTHASE 3 (MS3)	METHIONINE SYNTHASE 3 (MS3)METHIONINE SYNTHASE 3 (ATMS3)	Encodes a plastidic methionine synthase, involved in methionine de novo synthesis in the chloroplast	AT5G20980_c1	None
AT5G21170	(AKINBETA1)	(KINbeta1) (AKINBETA1)	Encodes AKINbeta1, a subunit of the SnRK1 kinase (Sucrose non-fermenting-1-related protein kinase). Involved in regulation of nitrogen and sugar metabolism. As part of the regulatory subunit, it binds maltose which promotes kinase activity. Acts as a global regulator of genes involved in carbon, lipid and nitrogen metabolism.	AT5G21170.1	None
AT5G21170	(AKINBETA1)	(KINbeta1) (AKINBETA1)	Encodes AKINbeta1, a subunit of the SnRK1 kinase (Sucrose non-fermenting-1-related protein kinase). Involved in regulation of nitrogen and sugar metabolism. As part of the regulatory subunit, it binds maltose which promotes kinase activity. Acts as a global regulator of genes involved in carbon, lipid and nitrogen metabolism.	AT5G21170_ID2	None
AT5G21170	(AKINBETA1)	(KINbeta1) (AKINBETA1)	Encodes AKINbeta1, a subunit of the SnRK1 kinase (Sucrose non-fermenting-1-related protein kinase). Involved in regulation of nitrogen and sugar metabolism. As part of the regulatory subunit, it binds maltose which promotes kinase activity. Acts as a global regulator of genes involved in carbon, lipid and nitrogen metabolism.	AT5G21170_c1	None
AT5G24120	SIGMA FACTOR E (SIGE)	SIGMA FACTOR 5 (ATSIG5)	Encodes a specialized sigma factor that functions in regulation of plastid genes and is responsible for the light-dependent transcription at the psbD LRP. Activation of SIG5 is dependent upon blue light and mediated by cryptochromes.	AT5G24120_P2	None
AT5G24120	SIGMA FACTOR E (SIGE)	SIGMA FACTOR 5 (ATSIG5)	Encodes a specialized sigma factor that functions in regulation of plastid genes and is responsible for the light-dependent transcription at the psbD LRP. Activation of SIG5 is dependent upon blue light and mediated by cryptochromes.	AT5G24120_P3	None
AT5G24120	SIGMA FACTOR E (SIGE)	SIGMA FACTOR 5 (ATSIG5)	Encodes a specialized sigma factor that functions in regulation of plastid genes and is responsible for the light-dependent transcription at the psbD LRP. Activation of SIG5 is dependent upon blue light and mediated by cryptochromes.	AT5G24120_P1	None
AT5G24120	SIGMA FACTOR E (SIGE)	SIGMA FACTOR 5 (ATSIG5)	Encodes a specialized sigma factor that functions in regulation of plastid genes and is responsible for the light-dependent transcription at the psbD LRP. Activation of SIG5 is dependent upon blue light and mediated by cryptochromes.	AT5G24120_JC5	None
AT5G24120	SIGMA FACTOR E (SIGE)	SIGMA FACTOR 5 (ATSIG5)	Encodes a specialized sigma factor that functions in regulation of plastid genes and is responsible for the light-dependent transcription at the psbD LRP. Activation of SIG5 is dependent upon blue light and mediated by cryptochromes.	AT5G24120_c2	None
AT5G53860	ANGULATA 7 (ANU7)	ANGULATA 7 (ANU7)EMBRYO DEFECTIVE 2737 (emb2737)EMBRYO DEFECTIVE 64 (EMB64)	Encodes a plant-specific protein with a domain similar to the central cysteine-rich domain of DnaJ proteins. It is involved in chloroplast and leaf development.	AT5G53860_JC10	None
AT5G53860	ANGULATA 7 (ANU7)	ANGULATA 7 (ANU7)EMBRYO DEFECTIVE 2737 (emb2737)EMBRYO DEFECTIVE 64 (EMB64)	Encodes a plant-specific protein with a domain similar to the central cysteine-rich domain of DnaJ proteins. It is involved in chloroplast and leaf development.	AT5G53860.2	None
AT5G53860	ANGULATA 7 (ANU7)	ANGULATA 7 (ANU7)EMBRYO DEFECTIVE 2737 (emb2737)EMBRYO DEFECTIVE 64 (EMB64)	Encodes a plant-specific protein with a domain similar to the central cysteine-rich domain of DnaJ proteins. It is involved in chloroplast and leaf development.	AT5G53860_JS8	None
AT5G53860	ANGULATA 7 (ANU7)	ANGULATA 7 (ANU7)EMBRYO DEFECTIVE 2737 (emb2737)EMBRYO DEFECTIVE 64 (EMB64)	Encodes a plant-specific protein with a domain similar to the central cysteine-rich domain of DnaJ proteins. It is involved in chloroplast and leaf development.	AT5G53860.3	None
AT5G53860	ANGULATA 7 (ANU7)	ANGULATA 7 (ANU7)EMBRYO DEFECTIVE 2737 (emb2737)EMBRYO DEFECTIVE 64 (EMB64)	Encodes a plant-specific protein with a domain similar to the central cysteine-rich domain of DnaJ proteins. It is involved in chloroplast and leaf development.	AT5G53860_JS9	PTC
AT5G53860	ANGULATA 7 (ANU7)	ANGULATA 7 (ANU7)EMBRYO DEFECTIVE 2737 (emb2737)EMBRYO DEFECTIVE 64 (EMB64)	Encodes a plant-specific protein with a domain similar to the central cysteine-rich domain of DnaJ proteins. It is involved in chloroplast and leaf development.	AT5G53860.5	None
AT5G53860	ANGULATA 7 (ANU7)	ANGULATA 7 (ANU7)EMBRYO DEFECTIVE 2737 (emb2737)EMBRYO DEFECTIVE 64 (EMB64)	Encodes a plant-specific protein with a domain similar to the central cysteine-rich domain of DnaJ proteins. It is involved in chloroplast and leaf development.	AT5G53860.1	None
AT5G53860	ANGULATA 7 (ANU7)	ANGULATA 7 (ANU7)EMBRYO DEFECTIVE 2737 (emb2737)EMBRYO DEFECTIVE 64 (EMB64)	Encodes a plant-specific protein with a domain similar to the central cysteine-rich domain of DnaJ proteins. It is involved in chloroplast and leaf development.	AT5G53860.4	None
AT5G65685	STARCH SYNTHASE 5 (SS5)	STARCH SYNTHASE 5 (SS5)	SS5 is a chloroplast-localized protein that is related to the canonical starch synthases (most closely to SS4), but is catalytically inactive. Arabidopsis ss5 mutants have near-normal total transitory starch contents, but produce fewer and larger starch granules in their chloroplast. SS5 can bind to starch in vitro, and interacts with MRC/PII1 in vivo.	AT5G65685_ID1	PTC
AT5G65685	STARCH SYNTHASE 5 (SS5)	STARCH SYNTHASE 5 (SS5)	SS5 is a chloroplast-localized protein that is related to the canonical starch synthases (most closely to SS4), but is catalytically inactive. Arabidopsis ss5 mutants have near-normal total transitory starch contents, but produce fewer and larger starch granules in their chloroplast. SS5 can bind to starch in vitro, and interacts with MRC/PII1 in vivo.	AT5G65685_ID21	None
AT5G65685	STARCH SYNTHASE 5 (SS5)	STARCH SYNTHASE 5 (SS5)	SS5 is a chloroplast-localized protein that is related to the canonical starch synthases (most closely to SS4), but is catalytically inactive. Arabidopsis ss5 mutants have near-normal total transitory starch contents, but produce fewer and larger starch granules in their chloroplast. SS5 can bind to starch in vitro, and interacts with MRC/PII1 in vivo.	AT5G65685_c3	PTC
AT5G65685	STARCH SYNTHASE 5 (SS5)	STARCH SYNTHASE 5 (SS5)	SS5 is a chloroplast-localized protein that is related to the canonical starch synthases (most closely to SS4), but is catalytically inactive. Arabidopsis ss5 mutants have near-normal total transitory starch contents, but produce fewer and larger starch granules in their chloroplast. SS5 can bind to starch in vitro, and interacts with MRC/PII1 in vivo.	AT5G65685_ID22	PTC
AT5G65685	STARCH SYNTHASE 5 (SS5)	STARCH SYNTHASE 5 (SS5)	SS5 is a chloroplast-localized protein that is related to the canonical starch synthases (most closely to SS4), but is catalytically inactive. Arabidopsis ss5 mutants have near-normal total transitory starch contents, but produce fewer and larger starch granules in their chloroplast. SS5 can bind to starch in vitro, and interacts with MRC/PII1 in vivo.	AT5G65685_c2	PTC
AT5G65685	STARCH SYNTHASE 5 (SS5)	STARCH SYNTHASE 5 (SS5)	SS5 is a chloroplast-localized protein that is related to the canonical starch synthases (most closely to SS4), but is catalytically inactive. Arabidopsis ss5 mutants have near-normal total transitory starch contents, but produce fewer and larger starch granules in their chloroplast. SS5 can bind to starch in vitro, and interacts with MRC/PII1 in vivo.	AT5G65685_ID20	None
AT5G65685	STARCH SYNTHASE 5 (SS5)	STARCH SYNTHASE 5 (SS5)	SS5 is a chloroplast-localized protein that is related to the canonical starch synthases (most closely to SS4), but is catalytically inactive. Arabidopsis ss5 mutants have near-normal total transitory starch contents, but produce fewer and larger starch granules in their chloroplast. SS5 can bind to starch in vitro, and interacts with MRC/PII1 in vivo.	AT5G65685.2	None
AT5G65685	STARCH SYNTHASE 5 (SS5)	STARCH SYNTHASE 5 (SS5)	SS5 is a chloroplast-localized protein that is related to the canonical starch synthases (most closely to SS4), but is catalytically inactive. Arabidopsis ss5 mutants have near-normal total transitory starch contents, but produce fewer and larger starch granules in their chloroplast. SS5 can bind to starch in vitro, and interacts with MRC/PII1 in vivo.	AT5G65685_ID19	PTC
AT5G65685	STARCH SYNTHASE 5 (SS5)	STARCH SYNTHASE 5 (SS5)	SS5 is a chloroplast-localized protein that is related to the canonical starch synthases (most closely to SS4), but is catalytically inactive. Arabidopsis ss5 mutants have near-normal total transitory starch contents, but produce fewer and larger starch granules in their chloroplast. SS5 can bind to starch in vitro, and interacts with MRC/PII1 in vivo.	AT5G65685_ID2	PTC
AT5G65685	STARCH SYNTHASE 5 (SS5)	STARCH SYNTHASE 5 (SS5)	SS5 is a chloroplast-localized protein that is related to the canonical starch synthases (most closely to SS4), but is catalytically inactive. Arabidopsis ss5 mutants have near-normal total transitory starch contents, but produce fewer and larger starch granules in their chloroplast. SS5 can bind to starch in vitro, and interacts with MRC/PII1 in vivo.	AT5G65685_ID26	PTC
AT5G65685	STARCH SYNTHASE 5 (SS5)	STARCH SYNTHASE 5 (SS5)	SS5 is a chloroplast-localized protein that is related to the canonical starch synthases (most closely to SS4), but is catalytically inactive. Arabidopsis ss5 mutants have near-normal total transitory starch contents, but produce fewer and larger starch granules in their chloroplast. SS5 can bind to starch in vitro, and interacts with MRC/PII1 in vivo.	AT5G65685.1	None
AT5G65685	STARCH SYNTHASE 5 (SS5)	STARCH SYNTHASE 5 (SS5)	SS5 is a chloroplast-localized protein that is related to the canonical starch synthases (most closely to SS4), but is catalytically inactive. Arabidopsis ss5 mutants have near-normal total transitory starch contents, but produce fewer and larger starch granules in their chloroplast. SS5 can bind to starch in vitro, and interacts with MRC/PII1 in vivo.	AT5G65685_ID24	PTC
AT5G65685	STARCH SYNTHASE 5 (SS5)	STARCH SYNTHASE 5 (SS5)	SS5 is a chloroplast-localized protein that is related to the canonical starch synthases (most closely to SS4), but is catalytically inactive. Arabidopsis ss5 mutants have near-normal total transitory starch contents, but produce fewer and larger starch granules in their chloroplast. SS5 can bind to starch in vitro, and interacts with MRC/PII1 in vivo.	AT5G65685_c1	PTC
AT5G65685	STARCH SYNTHASE 5 (SS5)	STARCH SYNTHASE 5 (SS5)	SS5 is a chloroplast-localized protein that is related to the canonical starch synthases (most closely to SS4), but is catalytically inactive. Arabidopsis ss5 mutants have near-normal total transitory starch contents, but produce fewer and larger starch granules in their chloroplast. SS5 can bind to starch in vitro, and interacts with MRC/PII1 in vivo.	AT5G65685_ID9	PTC
AT5G65685	STARCH SYNTHASE 5 (SS5)	STARCH SYNTHASE 5 (SS5)	SS5 is a chloroplast-localized protein that is related to the canonical starch synthases (most closely to SS4), but is catalytically inactive. Arabidopsis ss5 mutants have near-normal total transitory starch contents, but produce fewer and larger starch granules in their chloroplast. SS5 can bind to starch in vitro, and interacts with MRC/PII1 in vivo.	AT5G65685_ID3	PTC
AT5G65685	STARCH SYNTHASE 5 (SS5)	STARCH SYNTHASE 5 (SS5)	SS5 is a chloroplast-localized protein that is related to the canonical starch synthases (most closely to SS4), but is catalytically inactive. Arabidopsis ss5 mutants have near-normal total transitory starch contents, but produce fewer and larger starch granules in their chloroplast. SS5 can bind to starch in vitro, and interacts with MRC/PII1 in vivo.	AT5G65685_ID7	PTC
AT5G66190	FERREDOXIN-NADP(+)-OXIDOREDUCTASE 1 (FNR1)	LEAF FNR 1 (ATLFNR1)LEAF-TYPE CHLOROPLAST-TARGETED FNR 1 (LFNR1)FERREDOXIN-NADP(+)-OXIDOREDUCTASE 1 (FNR1)	Encodes a leaf-type ferredoxin:NADP(H) oxidoreductase. It is present in both chloroplast stroma and thylakoid membranes but is more abundant in the thylakoid. The affinity of this enzyme for ferredoxin is slightly, but significantly, higher than AtLFNR2, an isoform of the same enzyme. AtLFNR1 forms a heterodimer with AtFNR2 and is also a prerequisite to attach AtFNR2 to the thylakoid membrane.	AT5G66190.2	PTC
AT5G66190	FERREDOXIN-NADP(+)-OXIDOREDUCTASE 1 (FNR1)	LEAF FNR 1 (ATLFNR1)LEAF-TYPE CHLOROPLAST-TARGETED FNR 1 (LFNR1)FERREDOXIN-NADP(+)-OXIDOREDUCTASE 1 (FNR1)	Encodes a leaf-type ferredoxin:NADP(H) oxidoreductase. It is present in both chloroplast stroma and thylakoid membranes but is more abundant in the thylakoid. The affinity of this enzyme for ferredoxin is slightly, but significantly, higher than AtLFNR2, an isoform of the same enzyme. AtLFNR1 forms a heterodimer with AtFNR2 and is also a prerequisite to attach AtFNR2 to the thylakoid membrane.	AT5G66190.1	None
AT5G66190	FERREDOXIN-NADP(+)-OXIDOREDUCTASE 1 (FNR1)	LEAF FNR 1 (ATLFNR1)LEAF-TYPE CHLOROPLAST-TARGETED FNR 1 (LFNR1)FERREDOXIN-NADP(+)-OXIDOREDUCTASE 1 (FNR1)	Encodes a leaf-type ferredoxin:NADP(H) oxidoreductase. It is present in both chloroplast stroma and thylakoid membranes but is more abundant in the thylakoid. The affinity of this enzyme for ferredoxin is slightly, but significantly, higher than AtLFNR2, an isoform of the same enzyme. AtLFNR1 forms a heterodimer with AtFNR2 and is also a prerequisite to attach AtFNR2 to the thylakoid membrane.	AT5G66190_ID15	None
