# Supplementary material
Source: HighWire-hosted journal article supplement (doi:10.1101/rna.080738.125)
Supplement: S5_Data.xlsx [file S5_Data.xlsx]

## Sheet: S5 Data
GeneID	Name	Splice variant	Primer name	Primer sequence	Size (pb)
AT3G54050	HCEF1-HIGH CYCLIC ELECTRON FLOW 1	AT3G54050_P1, AT3G54050_ID1, AT3G54050_ID2	AtHCEF1 qPCR Fw	ACTAGATATCCAACCGACTGAGA	187
			AtHCEF1 qPCR Rv1	AGGACTTTCACCATTATGCATCT
		AT3G54050_JC2	AtHCEF1 Fw_JC2	GTACCCTCGTGACGCAAAGA	247
			AtHCEF1 qPCR Rv_JC2	CTATGCTGCTAGTGCTTATTATGTTTAGTACATG
AT4G27440	PORB-PROTOCHLOROPHYLLIDE OXIDOREDUCTASE B	AT4G27440.1	AtPORB qPCR Fw_1	CGAAGAAATCTAGTGAATTTCCGGG	106
			AtPORB qPCR Rv	GGCTACTCGCCAAGCAATCT
		AT4G27440.2	AtPORB qPCR Fw	ACTTGCTCAGGTGGTGAGTG	190
			AtPORB qPCR Rv_2	ACACTCAACAGACATTCAAGTTTATTAG
AT5G24120	SIG5- SIGMA FACTOR 5	AT5G24120_P1, AT5G24120_JC5, AT5G24120_P2, AT5G24120_P3	AtSig5 qPCR Fw	AGCTGCAAGATCTCCACTCG	191
			AtSig5 qPCR Rv	GCTTTCTCCTCGTTACTTCTC
		AT5G24120_c2	AtSig5 qPCR Fw_c2	AGCTGCAAGATCTCCACTCG	167
			AtSig5 qPCR Rv_c2	TCTTCACATTATTCTTTTCAGCAGGAATC
AT1G14150	PNSL2-PHOTOSYNTHETIC NDH SUBCOMPLEX L 2	AT1G14150.1	AtPNSL2 qPCR Fw_1	TCGAAAACATGAGTGAGTTGGATTTCTATG	178
			AtPNSL2 qPCR Rv	TGTAACGAGTCCAGAGATTTCATGT
		AT1G14150­_c1	AtPNSL2 qPCR Fw_c1	GACCACATGTCGTGGAGTTGGATTTCTATG	178
			AtPNSL2 qPCR Rv	TGTAACGAGTCCAGAGATTTCATGT
AT2G47450	CHAOS - CHLOROPLAST SIGNAL RECOGNITION PARTICLE 43	AT2G47450_P1	AtCHAOS qPCR Fw	TCGATGCCGTGGACGAAAA	130
			AtCHAOS qPCR Rv_P1	GTCAAGCCTCCCCTCATGTC
		AT2G47450_s1	AtCHAOS qPCR Fw	TCGATGCCGTGGACGAAAA	97
			AtCHAOS qPCR Rv_s1	TCCACCAGCGCCTCCGCCAGAAGCCTTA
