# Supplementary material
Source: HighWire-hosted journal article supplement (doi:10.1101/rna.080738.125)
Supplement: S6_Data.xlsx [file S6_Data.xlsx]

## Sheet: Up
GeneID	Description	Aliases	Log2FC	AdjustPvalue
AT1G01030	AP2/B3-like transcriptional factor family protein;(source:Araport11)	NGA3	0.819964771793083	0.000177600576642885
AT1G01040	Encodes a Dicer homolog. Dicer is a RNA helicase involved in microRNA processing. Mutations in this locus can result in embryo lethality. Embryo shape at seed maturity is globular-elongate. Other mutants convert the floral meristems to an indeterminate state, others yet show defects in ovule development. mRNA is expressed in all shoot tissues. DCL1 is able to produce miRNAs and siRNAs. The mRNA i…	ASU1,ATDCL1,CAF,DCL1,EMB60,EMB76,SIN1,SUS1	0.190656330361909	0.0343157110469614
AT1G01050	Encodes a soluble protein with inorganic pyrophosphatase activity that is highly specific for Mg-inorganic pyrophosphate.	AtPPa1,PPa1	0.318837271122765	0.000846014404345081
AT1G01070	Encodes a plasma membrane-localized amino acid transporter likely involved in amino acid export in the developing seed.	UMAMIT28	0.807972522103651	3.38359133830966e-06
AT1G01110	Member of IQ67 (CaM binding) domain containing family.	IQD18	0.850427632366325	0.000180531344164439
AT1G01170	ozone-responsive stress-like protein (DUF1138);(source:Araport11)	NA	0.388447998090898	0.0439684714383319
AT1G01200	RAB GTPase homolog A3;(source:Araport11)	ATRAB-A3,ATRABA3,RABA3	0.991426481882313	0.00225159137517303
AT1G01230	ORM1 is an ER localized orosomucoid-like protein involved in sphingolipid homeostasis.	AtORM1	0.430226612425098	0.000536872955916989
AT1G01240	transmembrane protein;(source:Araport11)	NA	0.601549844057897	0.00821051755020061
AT1G01260	bHLH13 interacts with JAZ proteins, and functions redundantly with bHLH3, bHLH14 and bHLH17 to negatively regulate jasmonate responses.	bHLH013,bHLH13,JAM2	0.834133871093145	4.15855236165112e-13
AT1G01300	Eukaryotic aspartyl protease family protein;(source:Araport11)	NA	0.691522555384518	1.30787428932538e-10
AT1G01355	Putative endonuclease or glycosyl hydrolase;(source:Araport11)	NA	2.13255603847489	0.0443360664811898
AT1G01380	ETC1 is involved in trichome and root hair patterning in Arabidopsis.	ETC1	2.20173943671732	9.48439543185718e-05
AT1G01390	Phosphatidylinositol 4-phosphate 5-kinase (PIP5K) enzyme family member.	NA	0.64594459775217	1.90378646809736e-10
AT1G01448	Natural antisense transcript overlaps with AT1G01450;(source:Araport11)	NA	1.0221683324095	3.07139440144138e-16
AT1G01510	Encodes a homolog of human CtBP. Mutant has longer and thicker leaves than wild type. Involved in controlling polar cell expansion in the leaf width direction. It has been shown to localize to cytosolic stress granules and is involved in their formation.	AN,DOQ	0.616328403695886	1.16959852745724e-12
AT1G01580	Encodes the low-iron-inducible ferric chelate reductase responsible for reduction of iron at the root surface. It is likely to be the major Fe(III) chelate reductase in Arabidopsis iron metabolism. Coordinately regulated with IRT1, the major transporter responsible for high-affinity iron uptake from the soil, at both transcriptional and posttranscriptional levels. Steady state mRNA levels are reg…	ATFRO2,FRD1,FRO2	1.82255072045785	3.82040786068092e-19
AT1G01600	Encodes a member of the CYP86A subfamily of cytochrome p450 genes. Expressed significantly at highest level in mature stems and flowers.	CYP86A4	1.33261668214505	1.82903925079252e-11
AT1G01620	a member of the plasma membrane intrinsic protein subfamily PIP1. localizes to the plasma membrane and exhibits water transport activity in Xenopus oocyte. expressed ubiquitously and protein level decreases slightly during leaf development. Involved redundantly with PIP1;1/2/4/5 in hydraulics and carbon fixation, regulates the expression of related genes that affect plant growth and development.	PIP1,PIP1C,TMP-B	1.00056643083167	9.79785284230025e-46
AT1G01640	Putative role in flower development. Comparison of SALK_011721C to Columbia wild type resulted in a trend toward earlier flowering in the mutant (P=0.1) (Stapleton and Woodruff 2009, personal communication).	NA	0.966394119923895	1.17418583671101e-07
AT1G01710	acyl-CoA thioesterase II;(source:Araport11)	NA	0.244319538078499	0.023289594734944
AT1G01725	adenylosuccinate synthetase;(source:Araport11)	NA	1.19503083725907	0.000379255587092705
AT1G01730	hypothetical protein;(source:Araport11)	NA	0.836775008631876	1.17504242880756e-14
AT1G01770	propionyl-CoA carboxylase;(source:Araport11)	NA	0.771113631181764	1.70689832041007e-15
AT1G01780	Encodes a member of the Arabidopsis LIM proteins: a family of actin bundlers with distinct expression patterns. WLIM1, WLIM2a, and WLIM2b are widely expressed, whereas PLIM2a, PLIM2b, and PLIM2c are predominantly expressed in pollen. Regulates actin cytoskeleton organization. The mRNA is cell-to-cell mobile.	PLIM2b	0.410278887999512	0.000281404541795905
AT1G01820	member of the peroxin11 (PEX11) gene family, integral to peroxisome membrane, controls peroxisome proliferation.	PEX11C	0.747708767554818	1.88243663721939e-18
AT1G01920	SET domain-containing protein;(source:Araport11)	NA	0.335706238306536	0.0198769701946376
AT1G01950	Encodes a member of the armadillo/beta-catenin repeat kinesin motor family. Mutants have twisted roots due to abnormal cell file rotation; the phenotype is dependent on microtubules.	ARK2,AtKINUb	0.493267290428494	1.83325001744271e-05
AT1G01960	Encodes one of the functionally redundant ARF guanine-nucleotide exchange factors (ARF-GEFs). Functions as regulators of post-Golgi trafficking.	BIG3,EDA10	0.371073710514393	1.75575338451381e-08
AT1G02050	Chalcone and stilbene synthase family protein;(source:Araport11)	LAP6,PKSA	0.830311611518231	0.000165739937886109
AT1G02060	Tetratricopeptide repeat (TPR)-like superfamily protein;(source:Araport11)	NA	1.01263055167731	6.00692326398223e-13
AT1G02100	Leucine carboxyl methyltransferase;(source:Araport11)	LCMT1,SBI1	0.587085438910778	1.38904344143887e-08
AT1G02110	bZIP domain class transcription factor (DUF630 and DUF632);(source:Araport11)	NA	1.03127163707752	3.30909974315737e-18
AT1G02120	Encodes VAD1 (Vascular Associated Death1), a regulator of cell death and defense responses in vascular tissues. VAD1 is a putative membrane associated protein and contains a GRAM domain. vad1 is a lesion mimic mutant that exhibits light conditional appearance of propagative HR (hypersensitive response)-like lesions along the vascular system. The mRNA is cell-to-cell mobile.	VAD1	0.365443702456971	3.63934115938569e-05
AT1G02145	homolog of asparagine-linked glycosylation 12;(source:Araport11)	ALG12,EBS4	0.369713023501221	0.00380627994143901
AT1G02150	Tetratricopeptide repeat (TPR)-like superfamily protein;(source:Araport11)	NA	0.355857045181067	4.50517694558935e-05
AT1G02170	Encodes a type I metacaspase. Two Arabidopsis metacaspases, AT1G02170 (MC1) and AT4G25110 (MC2) antagonistically control programmed cell death in Arabidopsis. MC1 is a positive regulator of cell death and requires conserved caspase-like putative catalytic residues for its function. MC2 negatively regulates cell death. This function is independent of the putative catalytic residues. A third type I…	ATMC1,AtMCP1b,ATMCPB1,LOL3,MC1,MCP1b	0.377148885778359	7.07736337046953e-05
AT1G02260	Divalent ion symporter;(source:Araport11)	NA	0.893561984495434	4.83171306337599e-14
AT1G02280	Encodes a GTP-binding GTP-ase. Component of the chloroplast protein import machinery. Required for import of POR B into plastids. Toc33 phosphorylation may not play an important role in vivo.	ATTOC33,PPI1,TOC33	0.649819188279055	5.050844252283e-15
AT1G02300	Encodes a capase involved in stress induced cell death.	AtcathB1	0.724446643980964	2.92340371313057e-06
AT1G02305	Encodes a capase involved in stress induced cell death.	AtcathB2	0.829651589030382	3.936734568494e-22
AT1G02340	Encodes a light-inducible, nuclear bHLH protein involved in phytochrome signaling. Mutants exhibit a long-hypocotyl phenotype only under far-red light but not under red light and are defective in other phytochrome A-related responses. Mutants also show blue light response defects. HFR1 interacts with COP1, co-localizes to the nuclear specks and is ubiquinated by COP1.	FBI1,HFR1,REP1,RSF1	0.309112834286862	0.0221094662195975
AT1G02400	Encodes a gibberellin 2-oxidase that acts on C19 gibberellins but not C20 gibberellins.	ATGA2OX4,ATGA2OX6,DTA1,GA2OX6	1.82850062521809	8.30574325769201e-35
AT1G02460	Pectin lyase-like superfamily protein;(source:Araport11)	NA	0.876207276682759	0.00171237220825035
AT1G02610	RING/FYVE/PHD zinc finger superfamily protein;(source:Araport11)	NA	1.49467852993191	8.82420815557331e-05
AT1G02620	Ras-related small GTP-binding family protein;(source:Araport11)	NA	2.64837699996159	0.00563687621335834
AT1G02640	encodes a protein similar to a beta-xylosidase located in the extracellular matrix. This is a member of glycosyl hydrolase family 3 and has six other closely related members.	ATBXL2,BXL2	1.97266498022898	7.60469880847681e-148
AT1G02650	Tetratricopeptide repeat (TPR)-like superfamily protein;(source:Araport11)	NA	1.16884650375783	0.0274171939690751
AT1G02660	PLIP2 is a glycerolipid A1 lipase with substrate preference for monogalactosyldiacylglycerol. Expression is induced by ABA.	PLIP2	1.71929486456338	4.05921877192244e-30
AT1G02800	Encodes a protein with similarity to endo-1,4-b-glucanases and is a member of Glycoside Hydrolase Family 9. CEL2 is induced by nemotodes and is expressed in syncitia induced by Heterodera schachtii.May be involved in the development and function of syncitia.	ATCEL2,CEL2,CEL2	4.04055056551268	3.17218042267669e-102
AT1G02810	Plant invertase/pectin methylesterase inhibitor superfamily;(source:Araport11)	NA	1.35525529949696	2.02207357617435e-12
AT1G02840	SR34/SR1 is a plant homologue of the human general/alternative splicing factor SF2/ASF. Barta et al (2010) have proposed a nomenclature for Serine/Arginine-Rich Protein Splicing Factors (SR proteins): Plant Cell. 2010, 22:2926.	At-SR34,ATSRP34,SR1,SR34,SRP34	1.01805114352791	8.17046121528291e-42
AT1G02860	Encodes a ubiquitin E3 ligase with RING and SPX domains that is involved in mediating immune responses and mediates degradation of PHT1s at plasma membranes. Targeted by MIR827. Ubiquitinates PHT1;3, PHT1;2, PHT1;1/AtPT1 and PHT1;4/AtPT2.	BAH1,NLA,SYG1	0.696740330369778	2.59880555004443e-09
AT1G02960	kinetochore protein;(source:Araport11)	NA	0.814360995968649	4.49470740915063e-07
AT1G03030	P-loop containing nucleoside triphosphate hydrolases superfamily protein;(source:Araport11)	NA	0.572970480542793	0.000762298513634984
AT1G03090	MCCA is the biotinylated subunit of the dimer MCCase, which is involved in leucine degradation. Both subunits are nuclear coded and the active enzyme is located in the mitochondrion.	MCCA	2.66762073478717	8.02162403170846e-208
AT1G03140	PRP18a is one of two paralogs (the other being PRP18b) which are highly similar to the step II splicing factors in yeast. Loss of function mutations show defects in alternative splicing, mostly intron retention events.	PRP18a	0.778256072371088	1.05638949410912e-16
AT1G03210	Phenazine biosynthesis PhzC/PhzF protein;(source:Araport11)	NA	0.679142250187247	1.24119312798692e-07
AT1G03230	Eukaryotic aspartyl protease family protein;(source:Araport11)	NA	0.497265701237123	1.00484604174167e-06
AT1G03260	SNARE associated Golgi protein family;(source:Araport11)	NA	0.492109026805825	0.00016219384396877
AT1G03270	CBS domain protein with a domain protein (DUF21);(source:Araport11)	NA	0.711301779875591	0.0342790732721672
AT1G03290	ELKS/Rab6-interacting/CAST family protein;(source:Araport11)	NA	0.64999289762046	4.16652320488356e-08
AT1G03380	yeast autophagy 18 G-like protein;(source:Araport11)	ATATG18G,ATG18G	0.337951305126648	2.62834803997315e-06
AT1G03430	Encodes AHP5, one of the six Arabidopsis thaliana histidine phosphotransfer proteins (AHPs). AHPs function as redundant positive regulators of cytokinin signaling. Members of the AHP gene family include: AT3G21510 (AHP1), AT3G29350 (AHP2), AT5G39340 (AHP3), AT3G16360 (AHP4), AT1G03430 (AHP5) and AT1G80100 (AHP6).	AHP5	0.52916648988775	0.000507602973073663
AT1G03550	Secretory carrier membrane protein (SCAMP) family protein;(source:Araport11)	AtSCAMP4,SCAMP4	0.3892136256148	0.00815093948618294
AT1G03610	plant/protein (DUF789);(source:Araport11)	NA	0.514323129640573	5.99500997968498e-08
AT1G03740	Protein kinase superfamily protein;(source:Araport11)	NA	0.479916214174993	2.12855932495066e-05
AT1G03790	Encodes SOMNUS (SOM), a nucleus-localized CCCH-type zinc finger protein. SOM negatively regulates light-dependent seed germination downstream of PIL5 (AT2G20180).	AtTZF4,SOM,TZF4	1.56823272895772	3.29738289117303e-30
AT1G03800	encodes a member of the ERF (ethylene response factor) subfamily B-1 of ERF/AP2 transcription factor family (ATERF-10). The protein contains one AP2 domain. There are 15 members in this subfamily including ATERF-3, ATERF-4, ATERF-7, and leafy petiole.	ATERF10,ERF10	1.5330618281993	0.0106051988030914
AT1G03850	Encodes glutaredoxin ATGRXS13, required to facilitate Botrytis cinerea infection of Arabidopsis thaliana plants. Sylvain La Camera et al (2011, PMID:21756272) reported a third splice variant in addition to the two annotated in TAIR10. It is a member of the CC-type glutaredoxin (ROXY) family that has been shown to interact with the transcription factor TGA2 and suppress ORA59 promoter activity.	ATGRXS13,GRXS13,ROXY18	0.491606678637591	9.37586510454907e-05
AT1G03870	fasciclin-like arabinogalactan-protein 9 (Fla9). Possibly involved in embryogenesis and seed development.	FLA9	1.42705593153825	5.74659439120525e-12
AT1G03900	member of NAP family, an heterogeneous subfamily of the ATP-binding Cassette (ABC) superfamily of membrane transporters. The NAPs proteins are characterized by having only one nucleotide-binding folds (NBFs) domain.	ABCI18,ATNAP4,NAP4	0.525802814286503	2.68955708263944e-11
AT1G03970	encodes a basic leucine zipper G-box binding factor that can bind to G-box motifs only as heterodimers with GBF2 or GBF3. A single amino acid change can confer G-box binding as homodimers.	GBF4	0.453637989145167	0.00639505840362502
AT1G04040	HAD superfamily, subfamily IIIB acid phosphatase;(source:Araport11)	NA	0.706091536720951	1.34225286472641e-08
AT1G04133	None;(source:Araport11)	NA	4.47052324439117	0.00667877660017378
AT1G04140	Transducin family protein / WD-40 repeat family protein;(source:Araport11)	NA	0.36420562749806	2.89452957860245e-06
AT1G04163	Natural antisense transcript overlaps with AT1G03100;(source:Araport11)	NA	3.30976994400955	0.00470360601258828
AT1G04180	YUCCA 9;(source:Araport11)	YUC9	1.02826736019466	0.0111138612289909
AT1G04183	Natural antisense transcript overlaps with AT1G03410;(source:Araport11)	NA	0.303392402116085	0.0499494126232732
AT1G04240	SHY2/IAA3 regulates multiple auxin responses in roots. It is induced rapidly by IAA, and has been shown to be phosphorylated by oat phytochrome A in vitro.	IAA3,SHY2	1.52630178282824	7.97487377822153e-12
AT1G04250	Transcription regulator acting as repressor of auxin-inducible gene expression. Auxin-inducible AUX/IAA gene. Short-lived nuclear protein with four conserved domains. Domain III has homology to beta alpha alpha dimerization and DNA binding domains. Involved in auxin signaling and is a positive modulator of natural leaf senescence. Auxin induces the degradation of the protein in a dosage-dependent…	AtIAA17,AXR3,IAA17	0.824837191104498	0.00188398447512868
AT1G04280	Encodes a mitochondrial CaM/Ca2+-dependent NAD+ kinase.	NA	0.533171714763303	5.65148244776352e-08
AT1G04300	Encodes MUSE13, a TRAF domain protein. Regulates the turnover of nucleotide-binding domain and leucine-rich repeat-containing (NLR) immune receptors SNC1 and RPS2. Loss of both MUSE13 and MUSE14 leads to enhanced pathogen resistance, NLR accumulation, and autoimmunity.In addition, MUSE13/14 physically interact with ATG6 and appear to regulate ATG6 ubiquitination and thus formation of autophagosom…	MUSE13,TRAF1b	0.758571163740289	8.25125319364807e-21
AT1G04310	encodes an ethylene receptor related to bacterial two-component histidine kinases.	ERS2	1.82863852147295	1.30795960399112e-58
AT1G04410	predicted to encode a cytosolic malate dehydrogenase.	c-NAD-MDH1	0.327374696453559	5.3717589089341e-05
AT1G04430	S-adenosyl-L-methionine-dependent methyltransferases superfamily protein;(source:Araport11)	NA	0.443718179871073	5.59652058264727e-08
AT1G04610	Encodes a member of the YUC family that is expressed in the root apex and is ethylene inducible in the root.	YUC3	0.922631759770149	3.7198861722049e-05
AT1G04620	Encodes a 7-hydroxymethyl chlorophyll a reductase, an enzyme of the chlorophyll cycle that converts 7-hydroxymethyl chlorophyll a to chlorophyll a.	HCAR	1.40795704261662	4.58398717738345e-41
AT1G04680	Pectin lyase-like superfamily protein;(source:Araport11)	NA	0.741789151593429	1.19855998827616e-14
AT1G04690	potassium channel beta subunit 1;(source:Araport11)	KAB1,KV-BETA1	0.306560831438248	0.000363628855672487
AT1G04733	U2;(source:Araport11)	U2-11	0.774792741604543	0.00343116584284088
AT1G04750	Encodes vesicle-associated membrane protein 7B (VAMP7B, or VAMP721). Required for cell plate formation.VAMP721 interacts with KAT1 and KC1 K+ channels, affects channel gating and suppresses the K+ current within the physiological voltage range. Post-transcriptionally regulated by CRT1/2 under ER stress.	AT_VAMP7B,ATVAMP721,VAMP721,VAMP7B	0.347003370928944	0.00101121259133676
AT1G04780	Ankyrin repeat family protein;(source:Araport11)	NA	0.199691244072673	0.0400947617967018
AT1G04820	Encodes an alpha tubulin isoform that is expressed in roots, leaves and flowers.	TOR2,TUA4	0.364306098017765	0.000106450411949257
AT1G04830	Ypt/Rab-GAP domain of gyp1p superfamily protein;(source:Araport11)	NA	0.32121561154241	0.00778047503072391
AT1G04850	ubiquitin-associated (UBA)/TS-N domain-containing protein;(source:Araport11)	NA	0.378032372779498	5.35222316365442e-05
AT1G04910	O-fucosyltransferase family protein;(source:Araport11)	NA	0.521083283925301	5.50350814406525e-05
AT1G04950	Encodes one of two Arabidopsis proteins with significant similarity to the histone fold TBP-associated factor TAF6. Mutants are embryo lethal and transmission of the mutant allele through the male gametophyte is significantly reduced. This is due to reduced pollen tube growth of the mutant.	ATTAF6,EMB2781,TAF6,TAFII59	0.624381377521554	6.54532310630673e-08
AT1G05000	Encodes an atypical dual-speci&	AtPFA-DSP1,PFA-DSP1	0.56318522209368	1.11274740516963e-05
AT1G05090	dentin sialophosphoprotein-like protein;(source:Araport11)	NA	0.471715510641257	0.0452530698602834
AT1G05120	Helicase protein with RING/U-box domain-containing protein;(source:Araport11)	NA	0.267013296597162	0.0268913341664861
AT1G05150	Calcium-binding tetratricopeptide family protein;(source:Araport11)	NA	0.327862001912792	0.00184002601353819
AT1G05160	Encodes an ent-kaurenoic acid hydroxylase, a member of the CYP88A cytochrome p450 family.	ATKAO1,CYP88A3,KAO1	0.937579630592184	3.42836500236779e-08
AT1G05163	Natural antisense transcript overlaps with AT1G15410;(source:Araport11)	NA	1.35879263293093	1.61043986143891e-05
AT1G05270	TraB family protein;(source:Araport11)	NA	0.484328569596915	0.000137574810650315
AT1G05380	Acyl-CoA N-acyltransferase with RING/FYVE/PHD-type zinc finger protein;(source:Araport11)	NA	0.235795500443374	0.0159523213729698
AT1G05410	CDPK adapter, putative (DUF1423);(source:Araport11)	NA	0.379973818767265	0.0241529196385176
AT1G05490	Involved in gene silencing. Locus-specific regulator of 24nt-siRNA expression, works together with CLSY1-4 as the master regulators of essentially all Pol-IV-dependent 24nt-siRNAs.	chr31,CLSY3	1.55292937262109	1.45790308351444e-07
AT1G05520	Sec23/Sec24 protein transport family protein;(source:Araport11)	AtSEC23B	0.275114409938719	0.000404107024265559
AT1G05530	Encodes a protein with glucosyltransferase activity with high sequence homology to UGT1 (AT1G05560). It belongs to an UGT subfamily that binds UDP-glucose but not UDP-glucuronate, UDP-galactose, or UDP-rhamnose as the glycosyl donor. UGT2 was shown to be able to use abscisic acid as glycosylation substrate in the presence of UDP-glucose.	UGT2,UGT75B2	1.07338574154557	0.0149923873219456
AT1G05570	Encodes a callose synthase 1 catalytic subunit . Member of Glycosyltransferase Family- 48.	ATGSL06,ATGSL6,CALS1,GSL06,GSL6	0.518011816073885	5.55971763903426e-10
AT1G05600	Tetratricopeptide repeat (TPR)-like superfamily protein;(source:Araport11)	EMB3101	0.544452891730693	0.0196066012052697
AT1G05750	Encodes a pentatricopeptide repeat protein required for editing of rpoA and clpP chloroplast transcripts.	CLB19,PDE247	0.494345795124626	0.00722976585985011
AT1G05790	lipase class 3 family protein;(source:Araport11)	NA	0.47297191785131	7.45241842104542e-06
AT1G05805	basic helix-loop-helix (bHLH) DNA-binding superfamily protein;(source:Araport11)	AKS2	1.12741505607392	1.23987117810208e-20
AT1G05810	Rab GTPase-like A5A protein;(source:Araport11)	ARA,ARA-1,ATRAB11D,ATRABA5E,RABA5E	1.4123269783142	1.86067525936836e-18
AT1G05830	Encodes a homolog of trithorax, a histone-lysine N-methyltransferase. Paralog of ATX1. Unlike ATX1 which is involved in trimethylating of histone H3-mysine 4, ATX2 is involved in dimethylating of histone H3-lysine 4. ATX1 and ATX2 influence the expression of largely nonoverlapping gene sets. The expression pattern of ATX2 is also different from that of ATX1.	ATX2,SDG30	0.272965387848512	0.00173193850622803
AT1G05835	PhD finger protein.	NA	3.09946139364602	9.87204732652696e-63
AT1G05840	Eukaryotic aspartyl protease family protein;(source:Araport11)	NA	1.16659459689167	1.85636741111629e-36
AT1G05890	RING/U-box superfamily protein;(source:Araport11)	ARI5,ATARI5	1.24804947089825	2.84785702103908e-58
AT1G05970	Anti-silencing factor. Forms a complex with ASI1-EDM2 that is required for expression of some nonintronic HC-TRE genes	AIPP1,EDM3	0.495057968904407	0.00787536493719742
AT1G06010	basic leucine zipper/W2 domain protein;(source:Araport11)	NA	0.748665628802505	0.00401600424214923
AT1G06070	Basic-leucine zipper (bZIP) transcription factor family protein;(source:Araport11)	bZIP69	0.765672960462427	2.52444136292677e-14
AT1G06080	Encodes a protein homologous to delta 9 acyl-lipid desaturases of cyanobacteria and acyl-CoA desaturases of yeast and mammals. expression down-regulated by cold temperature. It is involved in the desaturation of VLCFAs to make monounsaturated VLCFAs.	ADS1,AtADS1	4.07964003603667	2.65595471560685e-210
AT1G06110	SKP1/ASK-interacting protein 16;(source:Araport11)	SKIP16	0.839783133446343	2.38955118617272e-25
AT1G06120	Membrane bound acyl-lipid desaturases which can perform &	NA	0.620338669386309	0.0453796270844306
AT1G06130	glyoxalase 2-4;(source:Araport11)	GLX2-4	0.498869230155965	0.000118392865819903
AT1G06265	Natural antisense transcript overlaps with AT1G06260;(source:Araport11)	NA	1.68907755291048	2.88917471593053e-36
AT1G06350	Fatty acid desaturase family protein;(source:Araport11)	ADS4,AtADS4	3.18846913627241	1.47059387080983e-23
AT1G06390	encodes a GSK3/shaggy-like protein kinase. Gene expression is induced by NaCl and ABA but not KCl, suggesting that this gene may be involved in response to osmotic stress. This protein can interact with the BZR1 protein involved in brassinosteroid-mediated signaling in a Y2H assay and promotes BZR1 phosphorylation in protoplasts.	ATGSK1,ATSK2-3,ATSK22,BIL2,GSK1,SK22	0.543016141475629	1.07311238498195e-11
AT1G06400	small GTP-binding protein (ara-2).RabGTPase functioning in anterograde trafficking from trans-Golgi network/early endosomal compartments to the plasma membrane as well as in responses to salinity stress.	ARA-2,ARA2,ATRAB11E,ATRABA1A	0.504812758057232	2.56328524604049e-05
AT1G06460	ACD32.1 encodes an alpha-crystallin domain containing protein with homology to small heat shock proteins.	ACD31.2,ACD32.1	0.647241496000591	3.90620291508738e-09
AT1G06473	None;(source:Araport11)	NA	1.87980289461573	0.00856045698273232
AT1G06520	sn-glycerol-3-phosphate 2-O-acyltransferase. Expressed in flower buds and siliques. Homozygous mutant plants are male sterile.	ATGPAT1,GPAT1,sn-2-GPAT1	0.798112327959798	0.0358376116980287
AT1G06570	Mutation of the PDS1 locus disrupts the activity of p-hydroxyphenylpyruvate dioxygenase (HPPDase), the first committed step in the synthesis of both plastoquinone and tocopherols in plants.	HPD,HPPD,PDS1	0.683374485100536	8.28929439471618e-13
AT1G06580	Pentatricopeptide repeat (PPR) superfamily protein;(source:Araport11)	PPR1	0.724371412904958	0.0213956434390264
AT1G06620	encodes a protein whose sequence is similar to a 2-oxoglutarate-dependent dioxygenase The mRNA is cell-to-cell mobile.	NA	0.323851620268279	0.0291150763519427
AT1G06630	F-box/RNI-like superfamily protein;(source:Araport11)	NA	0.316925491299464	0.0198789742754348
AT1G06700	Protein kinase superfamily protein;(source:Araport11)	NA	0.980874119552359	2.61751004320791e-33
AT1G06760	winged-helix DNA-binding transcription factor family protein;(source:Araport11)	H1.1	0.286708319551488	0.00105994460272037
AT1G06840	Homomultimers interact with cytoplasmic signaling molecule PBL27, resulting in herbivory resistance, in an ethylene-dependent manner.	NA	0.346267722930961	0.000716712040214511
AT1G06850	bZIP protein involved in heat stress response. Under heat stress localization moves exclusively to nucleus.	AtbZIP52,bZIP52	0.918371684613616	2.57650216610965e-10
AT1G06890	UXT3 is a member of the NST-KT subfamily of nucleotide/sugar transporters. It is localized to the golgi and functions as a UDP-Xyl transporter.	UXT3	0.219325601526162	0.00639050917322959
AT1G06900	Insulinase (Peptidase family M16) family protein;(source:Araport11)	NA	0.49937186774057	5.82978204090777e-10
AT1G07020	hypothetical protein;(source:Araport11)	NA	0.801165406482963	1.49535278192055e-05
AT1G07040	plant/protein;(source:Araport11)	NA	1.16591543305617	6.11844978841344e-39
AT1G07090	LIGHT-DEPENDENT SHORT HYPOCOTYLS-like protein (DUF640);(source:Araport11)	LSH6	1.85040601783811	5.45849882493179e-31
AT1G07170	Similar to human splicing factor 3b, 14 kda subunit, SF3b14b.	NA	0.516806792487402	0.00511371361854242
AT1G07230	non-specific phospholipase C1;(source:Araport11)	NPC1	0.869434045813235	1.81326480709104e-21
AT1G07240	Encodes a UDP-glucosyltransferase that plays a role in abscisic acid (ABA) glucosylation from ABA to ABA-glucose ester and regulates ABA homeostasis, thereby influencing the ABA signal network.	UGT71C5	0.837599767666113	5.36514993908664e-14
AT1G07310	Calcium-dependent lipid-binding (CaLB domain) family protein;(source:Araport11)	NA	0.359049471090615	0.000391861933206452
AT1G07380	Encodes a neutral ceramidase that is involved in sphingolipid homeostasis and responses to oxidative stress.	AtNCER1	0.35121503311614	0.00310204685301424
AT1G07440	NAD(P)-binding Rossmann-fold superfamily protein;(source:Araport11)	NA	0.504331772404541	2.07989435189485e-06
AT1G07470	Transcription factor IIA, alpha/beta subunit;(source:Araport11)	NA	0.254267604704282	0.00982681458835226
AT1G07480	Transcription factor IIA, alpha/beta subunit;(source:Araport11)	NA	0.524331867624629	3.19046163197068e-09
AT1G07520	GRAS family transcription factor;(source:Araport11)	NA	0.569942519282866	1.35669594989545e-05
AT1G07530	Encodes a member of the GRAS family of transcription factors. The protein interacts with the TGA2 transcription factor and affects the transcription of stress-responsive genes. The protein is found in the nucleus and is also exported to the cytoplasm.	ATGRAS2,GRAS2,SCL14	0.494625297823633	8.63443765854542e-12
AT1G07550	Leucine-rich repeat protein kinase family protein;(source:Araport11)	NA	1.13572800806535	0.0269409639371794
AT1G07560	Leucine-rich repeat protein kinase family protein;(source:Araport11)	NA	0.59998704059699	0.0246750912084114
AT1G07630	Encodes a protein phosphatase 2C like gene, similar to POL. Involved in leaf development. Knockout mutants have abnormally shaped leaves.	PLL5	0.454746144138802	4.4434262383889e-05
AT1G07650	Leucine-rich repeat receptor-like kinase with extracellular malectin-like domain, which possesses cell death induction activity in plant leaves.	NA	0.606570509074937	6.5346971771618e-14
AT1G07690	transmembrane protein;(source:Araport11)	NA	1.38731237776467	0.020148627498214
AT1G07728	Natural antisense transcript overlaps with AT1G07725;(source:Araport11)	NA	0.550202283157565	7.68575215102663e-07
AT1G07745	Is a suppressor of SNI1. Encodes a member of the RecA/RAD51 family of DNA recombination and repair proteins. Both RAD51 and SNI1 have a dual role in pathogen-related gene transcription and somatic homologous recombination.	ATRAD51D,RAD51D,SSN1	0.963895552027872	0.000178339212368682
AT1G07750	RmlC-like cupins superfamily protein;(source:Araport11)	NA	0.47329697001817	1.76551119792358e-06
AT1G07770	Encodes cytoplasmic ribosomal protein S15a.	RPS15A	0.455158094395219	2.62863195975706e-09
AT1G07780	Encodes phosphoribosylanthranilate isomerase which catalyzes the third step of the tryptophan biosynthetic pathway. Member of gene family. The mRNA is cell-to-cell mobile.	PAI1,TRP6	0.56234337058971	0.000134690862728394
AT1G07830	ribosomal protein L29 family protein;(source:Araport11)	NA	0.522001978285702	0.00139431499193839
AT1G07990	SIT4 phosphatase-associated family protein;(source:Araport11)	NA	0.19750443542414	0.0163320924898785
AT1G08010	Encodes a member of the GATA factor family of zinc finger transcription factors.	GATA11	0.649195557020633	9.02642362486065e-10
AT1G08030	Encodes a tyrosylprotein sulfotransferase (TPST). This protein is a 500-aa type I transmembrane protein that shows no sequence similarity to animal TPSTs. Activity confirmed by protein expression in yeast. TPST is expressed throughout the plant body, and the highest levels of expression are in the root apical meristem. TPST acts in the auxin pathway to maintain postembryonic root stem cell niche …	AQC1,HPS7,TPST	0.739618047111604	1.96095604888082e-08
AT1G08110	Encodes a Zn2+ dependent glyoxylase.	AtGLYI2,GLXI	0.656580959248652	1.08882513802819e-11
AT1G08125	S-adenosyl-L-methionine-dependent methyltransferases superfamily protein;(source:Araport11)	NA	0.608507406395259	0.0204075397805652
AT1G08210	Eukaryotic aspartyl protease family protein;(source:Araport11)	NA	0.562516710678716	8.88422097676448e-06
AT1G08273	Natural antisense transcript overlaps with AT1G59850;(source:Araport11)	NA	1.53742734910214	0.0352295437762145
AT1G08310	alpha/beta-Hydrolases superfamily protein;(source:Araport11)	NA	0.987898642185199	0.017443202868685
AT1G08315	ARM repeat superfamily protein;(source:Araport11)	NA	0.586242521636856	5.62543460709756e-06
AT1G08320	bZIP transcription factor family protein;(source:Araport11)	bZIP21,TGA9	0.717914244487456	9.42305488889256e-09
AT1G08350	Endomembrane protein 70 protein family;(source:Araport11)	NA	0.285587914527498	0.0479513013641678
AT1G08460	histone deacetylase 8;(source:Araport11)	ATHDA8,HDA08,HDA8	1.13155399239287	1.02914308616674e-28
AT1G08480	Encodes subunit 6 of mitochondrial complex II (succinate dehydrogenase complex) and participates in the respiratory chain. It contributes to anchoring succinate dehydrogenase to the inner mitochondrial membrane. The mRNA is cell-to-cell mobile.	SDH6	0.379510518540359	0.00210383585675743
AT1G08500	early nodulin-like protein 18;(source:Araport11)	AtENODL18,ENODL18	2.07105603217262	1.59697197116153e-25
AT1G08510	Encodes an acyl-acyl carrier protein thioesterase. Hydrolyzes primarily saturated acyl-ACPs with chain lengths that vary between 8 and 18 carbons. Involved in saturated fatty acid synthesis. Nuclear-encoded, plastid-targeted globular protein that is functional as dimer.	FATB	0.393331995120632	0.000141146170471988
AT1G08590	Encodes one of the two putative eLRR kinase closely related to PXY (At1g08590/PXL1 and At4g28650/PXL2). Insertion mutants in either pxl1 or pxl2 do not exhibit an obvious phenotype in the stem; double-mutant combinations of a Col allele, of pxy (pxy-3) with pxl1 and pxl2, generate a more severe vascular phenotype than pxy-3 alone, suggesting that these genes act synergistically with PXY in regula…	ATPXL1,PXL1	0.96540105083104	1.3965880855284e-21
AT1G08592	Natural antisense transcript overlaps with AT1G08590;(source:Araport11)	NA	0.741784405214447	3.0522741450482e-07
AT1G08630	Encodes a threonine aldolase, involved in threonine degradation to glycine. Primarily expressed in seeds and seedlings.	THA1	1.67449382716293	1.98050407756974e-19
AT1G08660	Encodes a sialyltransferase-like protein that is localized to the Golgi apparatus and is involved in pollen tube growth and pollen germination.	MGP2,SIA1	0.865680251052999	6.42994317390952e-20
AT1G08710	F-box protein that is induced in roots by drought stress.	NA	0.394339834331199	0.045553257398945
AT1G08720	enhanced disease resistance 1 (EDR1) confers resistance to powdery mildew disease caused by the fungus Erysiphe cichoracearum The mRNA is cell-to-cell mobile.	ATEDR1,EDR1	0.223072783870168	0.020340728842231
AT1G08820	Encodes VAP33-like protein that interacts with cowpea mosaic virus protein 60K. Is a SNARE-like protein that may be involved in vesicular transport to or from the ER.	VAP27-2	0.559631692999282	6.32460438399122e-09
AT1G08890	Major facilitator superfamily protein;(source:Araport11)	NA	0.57513482038575	0.000166386146520995
AT1G08900	Major facilitator superfamily protein;(source:Araport11)	NA	1.47954588067086	1.97897114441653e-33
AT1G08930	encodes a putative sucrose transporter whose gene expression is induced by dehydration and cold. The mRNA is cell-to-cell mobile.	ERD6	0.710622972177676	8.07312989027162e-17
AT1G08980	Encodes an enzyme with similarity to bacterial acylamidohydrolases and exhibits indole-3-acetamide amidohydrolase activity in vitro. This enzyme may be involved in the in vivo biosynthesis of indole-acetic acid from indole-3-acetamide, a native metabolite of A. thaliana. It appears to exist as a monomer.	AMI1,ATAMI1,ATTOC64-I,TOC64-I	1.14304641401082	5.33574108948944e-35
AT1G09010	glycoside hydrolase family 2 protein;(source:Araport11)	NA	0.86115854717143	6.53664265906956e-26
AT1G09090	NADPH-oxidase AtrbohB plays a role in seed after-ripening. Major producer of superoxide in germinating seeds. AtrbohB pre-mRNA is alternatively spliced in seeds in a hormonally and developmentally regulated manner. ABA caused accumulation of AtrbohB-? mRNA and prevented prevented AtrbohB-a mRNA expression in fresh seeds.	ATRBOHB,ATRBOHB-BETA,RBOHB	1.1411826935439	4.82206793227191e-13
AT1G09150	pseudouridine synthase and archaeosine transglycosylase (PUA) domain-containing protein;(source:Araport11)	NA	0.45894962331737	3.04223545628315e-05
AT1G09195	Ppx-GppA phosphatase;(source:Araport11)	NA	0.813414777358086	4.35293491628513e-05
AT1G09280	rhodanese-like domain protein;(source:Araport11)	NA	1.18713919941607	2.18788106119217e-31
AT1G09420	Encodes a protein similar to glucose-6-phosphate dehydrogenase but, based on amino acid differences in the active site and lack of activity, does not encode a functional G6PDH. The amino acid sequence for the consensus sequence of the G6PDH active site (DHYLGKE) differs in three places in this protein. gc exon splice site at 20574 is based on protein alignment, and is not confirmed experimentally.	G6PD4	0.533934006510412	0.000365924679786853
AT1G09430	Encodes subunit A of the heteromeric enzyme ATP citrate lyase (ACL). In animals, ACL is encoded by a single gene; ACL in Arabidopsis is composed of two polypeptides, ACLA (encoded by 3 genes) and ACLB (encoded by 2 genes). The holoenzyme has an A(4)B(4)stoichiometry. Expression of both ACLA and ACLB but not of either of the subunits alone results in ACL activity.	ACLA-3	1.06224956013673	5.73732558637524e-45
AT1G09460	Carbohydrate-binding X8 domain superfamily protein;(source:Araport11)	NA	0.883018193400916	4.64388625565028e-15
AT1G09520	hypothetical protein;(source:Araport11)	NA	0.302995989372665	0.0424889612453605
AT1G09530	Transcription factor interacting with photoreceptors phyA and phyB. Forms a ternary complex in vitro with G-box element of the promoters of LHY, CCA1. Acts as a negative regulator of phyB signalling. It degrades rapidly after irradiation of dark grown seedlings in a process controlled by phytochromes. Does not play a significant role in controlling light input and function of the circadian clockw…	PAP3,PIF3	1.68537356739914	3.36973225496816e-87
AT1G09570	Light-labile cytoplasmic red/far-red light photoreceptor involved in the regulation of photomorphogenesis. It exists in two inter-convertible forms: Pr and Pfr (active) and functions as a dimer.The N terminus carries a single tetrapyrrole chromophore, and the C terminus is involved in dimerization. It is the sole photoreceptor mediating the FR high irradiance response (HIR). Major regulator in re…	FHY2,FRE1,HY8,PHYA	2.26998436177842	1.04370354967352e-254
AT1G09575	Mitochondrial calcium channel.	MCU1	1.16308749319963	1.46108305028906e-07
AT1G09640	Translation elongation factor EF1B, gamma chain;(source:Araport11)	NA	0.437737896528311	1.15789780330031e-11
AT1G09710	Paralog of DRMY1 with unknown function.	DP1	1.07162252932592	2.24795951522391e-13
AT1G09730	Encodes a SUMO protease that positively regulates the transition to flowering in long and short days. Along with SPF2, its activity is required for fertility as asp1/spf2 double mutants have defects in gametogenesis and embroygenesis.	ASP1,SPF1	0.213183836315486	0.0143601159452745
AT1G09740	Adenine nucleotide alpha hydrolases-like superfamily protein;(source:Araport11)	NA	0.313743139665147	0.00444858980335495
AT1G09770	Member of MYB3R- and R2R3- type MYB- encoding genes. Essential for plant innate immunity. Interacts with MOS4 and PRL1. The mRNA is cell-to-cell mobile.	ATCDC5,ATMYBCDC5,CDC5	0.952085364191693	1.12177582921723e-23
AT1G09870	histidine acid phosphatase family protein;(source:Araport11)	NA	0.286720330063268	0.00460102751679666
AT1G09910	Rhamnogalacturonate lyase family protein;(source:Araport11)	NA	1.10308775791363	1.24284314106396e-22
AT1G09960	low affinity (10mM) sucrose transporter in sieve elements (phloem)	ATSUC4,ATSUT4,SUC4,SUT4	0.454749332534372	0.00311090500483828
AT1G10070	Encodes a chloroplast branched-chain amino acid aminotransferase. Complements the yeast leu/iso-leu/val auxotrophy mutant. Involved in cell wall development.	ATBCAT-2,BCAT-2,BCAT2	4.00426944754537	2.41008306338724e-260
AT1G10095	Protein prenylyltransferase superfamily protein;(source:Araport11)	NA	0.596044005492825	0.00640209177456254
AT1G10120	basic helix-loop-helix (bHLH) DNA-binding superfamily protein;(source:Araport11)	CIB4	0.575020219588015	2.6597747773433e-09
AT1G10130	Encodes a golgi localized P2A-type Ca2+ ATPase involved in Mn nutrition and homeostasis.	ATECA3,ECA3	0.276495709104699	0.00197224040007378
AT1G10140	Uncharacterized conserved protein UCP031279;(source:Araport11)	NA	1.92968997751135	5.00532553026406e-57
AT1G10200	Encodes a member of the Arabidopsis LIM proteins: a family of actin bundlers with distinct expression patterns. WLIM1, WLIM2a, and WLIM2b are widely expressed, whereas PLIM2a, PLIM2b, and PLIM2c are predominantly expressed in pollen. Regulates actin cytoskeleton organization.	AtWLIM1,WLIM1	0.528624836302729	2.97369734058251e-06
AT1G10210	Encodes ATMPK1. Kinase is activated by wounding.	ATMPK1,MPK1	1.31838588640283	8.89157394369911e-26
AT1G10340	Ankyrin repeat family protein;(source:Araport11)	NA	0.861302969542157	0.00192697041049281
AT1G10400	UDP-Glycosyltransferase superfamily protein;(source:Araport11)	NA	1.14706663237863	0.00168349616246421
AT1G10430	Encodes one of the isoforms of the catalytic subunit of protein phosphatase 2A: AT1G59830/PP2A-1, AT1G10430/PP2A-2, At2g42500/PP2A-3, At3g58500/PP2A-4 [Plant Molecular Biology (1993) 21:475-485 and (1994) 26:523-528; Note that in more recent publications, there is mixed use of gene names for PP2A-3 and PP2A-4 - some refer to At2g42500 as PP2A-3 and some as PP2A-4]. It regulates the activation of …	PP2A-2	0.349864881289588	0.0014385869693169
AT1G10450	Encodes SIN3-like 6, a homolog of the transcriptional repressor SIN3 (AT1G24190).	SNL6	0.400915896593189	2.16847938234406e-05
AT1G10550	Encodes a membrane-localized protein that is predicted to function during cell wall modification.Overexpression of XTH33 results in abnormal cell morphology. It's expression is under epigenetic control by ATX1.	XET,XTH33	1.31818679830045	1.54737069123663e-12
AT1G10560	Encodes a protein containing a UND, a U-box, and an ARM domain. This protein has E3 ubiquitin ligase activity based on in vitro assays.	ATPUB18,PUB18	1.49304543215899	1.73666454514129e-06
AT1G10570	Encodes a deSUMOylating enzyme. In vitro it has both peptidase activity and isopeptidase activity: it can cleave the C-terminal residues from SUMO to activate it for attachment to a target protein and it can also act on the isopeptide bond between SUMO and another protein. sYFP:OTS2 protein accumulates in nuclei in a punctate pattern. Double mutant analysis with ULP1D/OTS1 indicates that these ge…	OTS2,ULP1C	0.792571633800294	2.57948139529375e-08
AT1G10590	Nucleic acid-binding, OB-fold-like protein;(source:Araport11)	NA	0.627003097177723	9.17241572055008e-14
AT1G10600	associated molecule with the SH3 domain of STAM 2;(source:Araport11)	AMSH2	0.339029331487586	0.035349070743462
AT1G10610	basic helix-loop-helix (bHLH) DNA-binding superfamily protein;(source:Araport11)	NA	0.998815143528029	1.09187951652589e-07
AT1G10630	A member of ARF GTPase family. A thaliana has 21 members of this family, known to be essential for vesicle coating and uncoating and functions in GTP-binding. Gene encoding ADP-ribosylation factor and similar to other ARFs and ARF-like proteins. The gene is shown to play a role in cell division, cell expansion and cellulose production using antisense construct.	ARFA1F,ATARFA1F	0.214228119850682	0.0399092623263843
AT1G10660	transmembrane protein;(source:Araport11)	NA	0.363519101461567	2.07718678274722e-05
AT1G10690	cyclin-dependent kinase inhibitor;(source:Araport11)	SMR8	0.85737601193712	0.0229321301102889
AT1G10730	Clathrin adaptor complexes medium subunit family protein;(source:Araport11)	AP1M1	0.402360891942634	0.0453590141815215
AT1G10840	Encodes eukaryotic initiation factor 3H1 subunit (TIF3H1).	TIF3H1	0.502327018759172	1.72440611167981e-08
AT1G10890	arginine/glutamate-rich 1 protein;(source:Araport11)	NA	0.724655792373717	6.35288953082941e-09
AT1G10910	Member of the P subfamily of PRR proteins. Loss of function results in defects in abnormal plastid RNA edit and chloroplast biogenesis	EMB3103,PDM2	0.527920814128433	2.70060346610507e-07
AT1G10940	Encodes a plant protein kinase similar to the calcium/calmodulin-dependent protein kinase subfamily and the SNF1 kinase subfamily (SnRK2) whose activity is activated by ionic (salt) and non-ionic (mannitol) osmotic stress. Kinase activity of its homolog in tobacco is induced by hyperosmotic condition within 1 minute. Phosphatidylinositol 4-phosphate 5-kinase (PIP5K) enzyme family member.	ASK1,SNRK2-4,SNRK2.4,SRK2A	0.422398909127383	4.11534128937102e-05
AT1G10950	Encodes an Arabidopsis Transmembrane nine (TMN) protein. Transmembrane nine (TM9) proteins are localized in the secretory pathway of eukaryotic cells and are involved in cell adhesion and phagocytosis. Functions in the deposition of rhamnogalacturonan II and I for cell growth.	AtTMN1,EMP12,TMN1	0.563772344075648	1.22670587759718e-18
AT1G11000	A member of a large family of seven-transmembrane domain proteins specific to plants, homologs of the barley mildew resistance locus o (MLO) protein. The Arabidopsis genome contains 15 genes encoding MLO proteins, with localization in plasma membrane. Phylogenetic analysis revealed four clades of closely-related AtMLO genes. ATMLO4 belongs to the clade I, with AtMLO11 and AtMLO14. The gene is exp…	ATMLO4,MLO4	1.89928352187566	2.9553557271428e-28
AT1G11020	RING/FYVE/PHD zinc finger superfamily protein;(source:Araport11)	NA	0.563821691075359	1.92999150605323e-05
AT1G11050	Protein kinase superfamily protein;(source:Araport11)	NA	0.390059823458207	0.0207216912659559
AT1G11120	CTTNBP 2 amino-terminal-like protein;(source:Araport11)	NA	1.76792133564596	1.24336182869968e-15
AT1G11175	other_RNA;(source:Araport11)	NA	1.43529970298848	1.09002760243972e-22
AT1G11210	cotton fiber protein, putative (DUF761);(source:Araport11)	NA	0.835874510851863	0.000529690334732022
AT1G11240	ribosomal RNA-processing protein;(source:Araport11)	NA	1.31932583068799	0.00145530921451411
AT1G11260	Encodes a H+/hexose cotransporter. The mRNA is cell-to-cell mobile.	ATSTP1,STP1	2.26036586788292	7.88112374633805e-138
AT1G11270	F-box and associated interaction domains-containing protein;(source:Araport11)	NA	0.952175306345323	1.72100988021823e-07
AT1G11350	S-domain-1 13;(source:Araport11)	CBRLK1,RKS2,SD1-13	0.775005522873061	6.63281018740889e-07
AT1G11360	Adenine nucleotide alpha hydrolases-like superfamily protein;(source:Araport11)	NA	0.705068475305373	2.2482665181868e-08
AT1G11480	eukaryotic translation initiation factor-like protein;(source:Araport11)	NA	0.612713254717362	6.17351270733298e-11
AT1G11530	Encodes a monocysteinic thioredoxin, thioredoxin in which the second cysteine of the redox site is replaced by a serine, with low disulfide reductase but efficient disulfide isomerase activity. The mRNA is cell-to-cell mobile.	ATCXXS1,CXXS1	0.930511143972263	2.28694670296553e-05
AT1G11545	xyloglucan endotransglucosylase/hydrolase 8;(source:Araport11)	XTH8	2.35044142685337	2.65993585475947e-76
AT1G11580	methylesterase PCR A;(source:Araport11)	ATPMEPCRA,PMEPCRA	0.633662169664556	1.34495414827128e-12
AT1G11650	Encodes an RNA binding protein with three RNA recognition motifs. The mRNA is cell-to-cell mobile.	ATRBP45B,RBP45B	0.166007975345742	0.0113533887140318
AT1G11930	Putative pyridoxal phosphate-dependent enzyme, YBL036C type;(source:Araport11)	NA	0.787178864737931	0.00139431499193839
AT1G11950	Transcription factor jumonji (jmjC) domain-containing protein;(source:Araport11)	NA	0.359466182978736	0.0347108964131801
AT1G11960	Calcium channel that is phosphorylated by BIK1 in the presence of PAMPS and required for stomatal immunity.	NA	0.64346871662424	2.82934482151877e-08
AT1G12080	Vacuolar calcium-binding protein-like protein;(source:Araport11)	NA	1.86254300847663	6.04319753500168e-15
AT1G12110	Encodes NRT1.1 (CHL1), a dual-affinity nitrate transporter. The protein is expressed in guard cells and function in stomatal opening. Mutants have less transpiration and are more tolerant to drought. Expressed in lateral roots. Involved in nitrate signaling which enables the plant root system to detect and exploit nitrate-rich soil patches. Comparing to the wild type, the mutant displays a strong…	AtNPF6.3,ATNRT1,B-1,CHL1,CHL1-1,NPF6.3,NRT1,NRT1.1	1.7144266504685	1.37675794148867e-72
AT1G12160	Encodes a flavin-containing monooxygenases involved in biosynthesis of aliphatic glucosinolates.	FMOGS-OX7	0.925267942846795	3.88374838738258e-12
AT1G12200	Putative flavin monooxygenase.	FMO	0.273739263079373	0.0444143496259721
AT1G12220	Resistance gene, mediates resistance against the bacterial pathogen Pseudomonas syringae. Contains a putative nucleotide binding site composed of kinase-1a (or P-loop), kinase-2a, and putative kinase-3a domains, 13 imperfect leucine-rich repeats, a potential leucine zipper, and two uncharacterized motifs that are well conserved in products of previously isolated R genes. Confers resistance to Pse…	RPS5	0.573572716903735	0.000616568554098476
AT1G12230	Aldolase superfamily protein;(source:Araport11)	NA	0.516054500900252	2.39140599110807e-11
AT1G12290	NLR protein localized to plasma membrane. Overexpression triggers cell death. Has myristolation site at Gly2 which is required for membrane localization.	NA	0.452544587890598	0.00510321672649209
AT1G12310	Calcium-binding EF-hand family protein;(source:Araport11)	NA	0.307800101192553	0.000614486440625671
AT1G12360	encodes a Sec1 protein and expressed throughout the plant. physically interacts with Syntaxin1 and is required for cytokinesis.	KEU,SEC11	0.401120256488708	5.29727889733648e-07
AT1G12390	Cornichon family protein;(source:Araport11)	NA	0.36251766481907	0.0167693032116054
AT1G12580	phosphoenolpyruvate carboxylase-related kinase 1;(source:Araport11)	PEPKR1	0.287632095951482	0.00608565657367565
AT1G12760	Zinc finger, C3HC4 type (RING finger) family protein;(source:Araport11)	NA	0.187615370366523	0.0448572448273528
AT1G12780	Encodes a UDP-glucose epimerase that catalyzes the interconversion of the sugar nucleotides UDP-glucose UDP-galactose via a UDP-4-keto-hexose intermediate. Responsive to stress.	ATUGE1,UGE1	1.56661714879292	6.3698076918679e-104
AT1G12790	DNA ligase-like protein;(source:Araport11)	NA	1.01202679977731	2.78840828875098e-10
AT1G12805	nucleotide binding protein;(source:Araport11)	NA	3.24605008067359	0.000485495196349846
AT1G12810	proline-rich family protein;(source:Araport11)	NA	0.39670725961733	0.000858052534566787
AT1G12820	Auxin receptor involved in primary and lateral root growth inhibition in response to nitrate. Target of miR393. Induced by nitrate in primary roots.	AFB3	0.377885089223774	1.01181456827846e-05
AT1G12845	transmembrane protein;(source:Araport11)	NA	0.634952327052058	0.000250600805355642
AT1G12850	Phosphoglycerate mutase family protein;(source:Araport11)	NA	0.231577441862097	0.0153819806123602
AT1G12910	Encodes LIGHT-REGULATED WD1 (LWD1), a clock proteins regulating circadian period length and photoperiodic flowering.	ATAN11,LWD1	0.723248933606123	8.04265431442634e-16
AT1G12920	Encodes a eukaryotic release factor one homolog.	ERF1-2	0.518907631409531	2.3849833898699e-10
AT1G12930	Ran effector.	NA	0.606622141009432	1.48784157276164e-09
AT1G12970	Encodes PIRL3, a member of the Plant Intracellular Ras-group-related LRRs (Leucine rich repeat proteins). PIRLs are a distinct, plant-specific class of intracellular LRRs that likely mediate protein interactions, possibly in the context of signal transduction.	PIRL3	0.518138760650698	3.48817184548358e-05
AT1G12990	beta-1,4-N-acetylglucosaminyltransferase family protein;(source:Araport11)	NA	0.266411591489748	0.0238136371263844
AT1G13000	transmembrane protein, putative (DUF707);(source:Araport11)	NA	0.362366210876369	0.0191620025199351
AT1G13100	putative cytochrome P450	CYP71B29	0.7270937271905	5.17738519396425e-05
AT1G13110	member of CYP71B The mRNA is cell-to-cell mobile.	CYP71B7	0.964107453484735	9.91322297092849e-16
AT1G13143	hypothetical protein;(source:Araport11)	NA	2.56664087356431	0.0431334147392766
AT1G13170	OSBP(oxysterol binding protein)-related protein 1D;(source:Araport11)	ORP1D	0.31627140571641	0.026389272296139
AT1G13210	Autoinhibited Ca2+/ATPase II. ALA11 acts redundantly with ALA3, ALA4, ALA5, ALA9, ALA10 in root and shoot development as well as PIN trafficking and polarity .	ACA.l	0.929759087077957	3.59496555090522e-24
AT1G13245	ROTUNDIFOLIA like 17;(source:Araport11)	DVL4,RTFL17	0.908929013471825	0.00318730371927216
AT1G13250	Encodes a protein with putative galacturonosyltransferase activity.	GATL3	1.66868404942045	2.9187693189732e-35
AT1G13260	Encodes an AP2/B3 domain transcription factor which is upregulated in response to low temperature. It contains a B3 DNA binding domain. It has circadian regulation and may function as a negative growth regulator. The mRNA is cell-to-cell mobile.	AtRAV1,EDF4,RAV1	2.54217095328857	1.03458323070173e-114
AT1G13280	Encodes allene oxide cyclase. One of four genes in Arabidopsis that encode this enzyme, which catalyzes an essential step in jasmonic acid biosynthesis. Gene expression is reduced during senescence, a process that involves jasmonic acid signalling pathway.	AOC4	1.46965930341578	2.45002107412474e-31
AT1G13430	Encodes a sulfotransferase. Unlike the related ST4A protein (At2g14920), in vitro experiements show that this enzyme does not act brassinosteroids. ST4C is expressed in the roots and transcript levels rise in response to cytokinin treatment.	ATST4C,ST4C	0.961918134242779	0.00417646170950701
AT1G13450	Encodes GT-1, a plant transcription factor that binds to one of the cis-acting elements, BoxII, which resides within the upstream promoter region of light-responsive genes. GT-1 was assumed to act as a molecular switch modulated through Ca(2+)-dependent phosphorylation/dephosphorylation in response to light signals.	GT-1	0.569677869764261	2.50294414033894e-05
AT1G13570	F-box/RNI-like superfamily protein;(source:Araport11)	NA	0.879452574804566	3.46993035243514e-16
AT1G13640	Phosphatidylinositol 3- and 4-kinase family protein;(source:Araport11)	NA	0.997033596279262	9.76242858272268e-41
AT1G13710	Encodes the cytochrome P450 CYP78A5 monooxygenase. Contributes to the generation of a growth-stimulating signal distinct from the classical phytohormones that prevents proliferation arrest, promoting organ growth. In ovules it is required for megagametogenesis, maternal control of seed size and restricting megaspore mother cell fate to a single cell.	CYP78A5,KLU	0.347995871694309	0.00417403454760404
AT1G13960	Encodes WRKY DNA-binding protein 4 (WRKY4).	WRKY4	0.259124160039869	0.0110163280135558
AT1G13980	Encodes a GDP/GTP exchange factor for small G-proteins of the ADP ribosylation factor (RAF) class, and as regulator of intracellular trafficking. Homologous to Sec7p and YEC2 from yeast. Involved in the specification of apical-basal pattern formation. Essential for cell division, expansion and adhesion. It appears that heteotypic binding between the DCB and C-terminal domains of two GNOM proteins…	EMB30,GN,MIZ2,VAN7	0.503415494989163	4.74000063083504e-14
AT1G14210	Ribonuclease T2 family protein;(source:Araport11)	NA	0.365753414027695	0.018181085512374
AT1G14280	Encodes phytochrome kinase substrate 2. PKS proteins are critical for hypocotyl phototropism. Forms a complex with Phot1, Phot2 and NPH3.	PKS2	0.802615446635067	3.11822014307157e-08
AT1G14350	Encodes a putative MYB transcription factor involved in stomata development, loss of FLP activity results in a failure of guard mother cells (GMCs) to adopt the guard cell fate, thus they continue to divide resulting in abnormal stomata consisting of clusters of numerous guard cell-like cells. This phenotype is enhanced in double mutants with MYB88. Its transcript levels change after inducing MUT…	AtMYB124,FLP,MYB124	0.408555962915614	0.0106508585413234
AT1G14370	Encodes protein kinase APK2a. Protein is N-myristoylated.	APK2A,Kin1,PBL2	0.54505345821728	1.82099107438489e-05
AT1G14380	Encodes a microtubule-associated protein.Member of IQ67 (CaM binding) domain containing family.	IQD28	0.392284247128913	0.000169066844576719
AT1G14390	Leucine-rich repeat protein kinase family protein;(source:Araport11)	NA	1.00922786097939	0.000262378109046821
AT1G14400	ubiquitin carrier protein	ATUBC1,UBC1,UBC1	0.526206702567922	1.08940344630362e-14
AT1G14440	homeobox protein 31;(source:Araport11)	AtHB31,FTM2,HB31,ZHD4	0.408286520027666	0.00251960960227324
AT1G14510	Encodes a member of the Alfin1-like family of nuclear-localized PHD (plant homeodomain) domain containing proteins. All AL proteins except AL3 bind to di- or trimethylated histone H3 (H3K4me3/2). Members of this family include: AT5G05610 (AL1), AT3G11200 (AL2), AT3G42790 (AL3), AT5G26210 (AL4), AT5G20510 (AL5), AT2G02470 (AL6), AT1G14510 (AL7).	AL7,AtAL7	0.254321005770541	0.0422414563555711
AT1G14530	tobamovirus multiplication-like protein (DUF1084);(source:Araport11)	THH1	0.488514163703349	0.0382646482643657
AT1G14570	Encodes a nuclear UBX-containing protein that can bridge ubiquitin to AtCDC48A.	AtPUX7,PUX7	0.245781703259573	0.0104671525121611
AT1G14590	Nucleotide-diphospho-sugar transferase family protein;(source:Araport11)	NA	0.633297137419967	0.000126530072918393
AT1G14600	Homeodomain-like superfamily protein;(source:Araport11)	NA	2.41342974402218	1.86543575173531e-16
AT1G14650	SWAP (Suppressor-of-White-APricot)/surp domain-containing protein / ubiquitin family protein;(source:Araport11)	NA	0.354223738103282	3.12810498946763e-06
AT1G14660	member of putative Na+/H+ antiporter (AtNHX) family. Functions as a plasma membrane Li+/H+ antiporter. Involved in Li+ efflux and detoxification.	ATNHX8,NHX8,NHX8	0.560284526978948	0.0102681583250089
AT1G14685	Encodes a member of the BASIC PENTACYSTEINE (BPC) proteins. BPC proteins are plant-specific transcription factors present throughout land plants. BPC transcription factor family is integral for a wide range of processes that support normal growth and development.Along with BPC1, BPC2 binds to the promoter of and represses GALS1 thereby reducing beta 1,4- galactan accumulation.	ATBPC2,BBR/BPC2,BPC2	0.231055879617953	0.0126281757490265
AT1G14740	Encodes a PHD-finger protein that, with TTA1, is redundantly required for MP-dependent embryonic root meristem initiation.	OBE3,TTA1	1.50250196942638	1.00045848570012e-101
AT1G14780	MAC/Perforin domain-containing protein;(source:Araport11)	NA	0.607135828724699	0.00120564370440921
AT1G14790	Encodes RNA-dependent RNA polymerase. While not required for virus-induced post-transcriptional gene silencing (PTGS), it can promote turnover of viral RNAs in infected plants. Nomenclature according to Xie, et al. (2004). Involved in the production of Cucumber Mosaic Virus siRNAs.	AtRDR1,ATRDRP1,RDR1	0.526937327333756	3.27707464814693e-05
AT1G14860	nudix hydrolase homolog 18;(source:Araport11)	atnudt18,NUDT18	1.35893029013273	1.02982229674328e-22
AT1G14870	PCR2 encodes a membrane protein involved in zinc transport and detoxification.	AtPCR2,PCR2	0.502548042537307	0.0010306237855423
AT1G14890	Plant invertase/pectin methylesterase inhibitor superfamily protein;(source:Araport11)	NA	1.93611241646251	1.95939559685225e-89
AT1G14900	Encodes a protein belonging to the subgroup of HMGA (high mobility group A) proteins that interact with A/T-rich stretches of DNA.	HMGA	0.536933870240177	9.63037767398673e-11
AT1G14910	ANTH domain-containing protein which functions as adaptor protein for clathrin-mediated endocytosis (CME) of the secretory vesicle-associated longintype R-SNARE VAMP72 group. Interacts with the SNARE domain of VAMP72 and clathrin at the plasma membrane. Required for recycling of R-SNARE proteins.	PICALM1b	0.732414414361917	1.13029552634957e-15
AT1G14920	Similar to a putative transcription factor and transcriptional coactivators. Repressor of GA responses and involved in gibberellic acid mediated signaling. Member of the DELLA proteins that restrain the cell proliferation and expansion that drives plant growth. The protein undergoes degradation in response to GA via the 26S proteasome. GAI may be involved in reducing ROS accumulation in response …	GAI,RGA2	1.68283771668009	1.18970277727005e-76
AT1G15020	Encodes a protein disulfide isomerase-like (PDIL) protein, a member of a multigene family within the thioredoxin (TRX) superfamily. This protein also belongs to the quiescin-sulfhydryl oxidase (QSOX) family, which possess an Erv1-like domain at the COOH terminus in addition to a TRX domain.	ATQSOX1,QSO2,QSOX1	0.788755278996413	7.64685560231056e-17
AT1G15040	Encodes a nitrogen regulated putative glutamine amidotransferase that represses shoot branching.	GAT,GAT1_2.1	1.38426207667059	2.18467748897256e-24
AT1G15130	ALIX mediates endosomal protein trafficking and turnover through the ESCRT/MVB pathway. One target is the phosphate transporter PHT1;1. Modulates ABA-mediated inhibition of plant growth and stomatal aperture (PMID:31363038).	NA	0.24080513396945	0.00117119036371131
AT1G15180	MATE efflux family protein;(source:Araport11)	NA	0.380576455648578	0.000234925406249887
AT1G15210	pleiotropic drug resistance 7;(source:Araport11)	ABCG35,ATPDR7,PDR7	1.05829968009018	8.47699582202551e-40
AT1G15215	Encodes SHH1, a homeodomain protein required for DNA methylation. It is an atypical RNA-directed DNA methylation component, and functions in transcriptional silencing through both DNA methylation-dependent and -independent pathways.	DTF1,SHH1	0.640148502238932	0.0367048738653331
AT1G15220	Encodes a protein with oxidoreductase activity present in the inner membrane of mitochondria. CCMH is postulated to play a central role in mitochondrial cytochrome c maturation, probably as part of a heme lyase complex that also holds activity of reducing apocytochrome c. CCMH interacts with apocytochrome AtCYTc-a and is shown to be present in a 500 kDa-complex along with CcmFN2.	ATCCMH,CCMH	0.814081054949664	0.000323862723334627
AT1G15230	hypothetical protein;(source:Araport11)	NA	1.2447658136112	1.19459882581763e-08
AT1G15240	Encodes a member of the Arabidopsis sorting nexin family.	NA	0.205752495852807	0.0256460607127651
AT1G15250	cytosolic ribosomal protein gene, part of eL20 family	NA	0.423444590651465	0.04356147167714
AT1G15330	Cystathionine beta-synthase (CBS) protein;(source:Araport11)	NA	1.25713803322559	7.44422919514064e-05
AT1G15350	DUF4050 family protein;(source:Araport11)	NA	1.55335428409674	5.62831733022546e-59
AT1G15380	Glyoxalase which affects ABA?JA crosstalk.	GLYI4	1.57645703348727	6.17396906543012e-43
AT1G15400	Tightly connected with MAPK signaling to fine-tune stomatal production and patterning.	NA	0.695496942800571	3.62497091466153e-06
AT1G15405	other_RNA;(source:Araport11)	NA	0.981559468529774	0.00437584869859851
AT1G15530	Concanavalin A-like lectin protein kinase family protein;(source:Araport11)	LecRK-S.1	0.644305509300206	2.09104796596078e-10
AT1G15550	Involved in later steps of the gibberellic acid biosynthetic pathway. Activated by AGAMOUS in a cal-1, ap1-1 background. Deletion of 208 bp from -1016 to -809 (&	ATGA3OX1,GA3OX1,GA4	0.341547900843416	0.0230222304502912
AT1G15625	E3 ubiquitin-protein ligase;(source:Araport11)	NA	1.0014101115551	0.0245562601501354
AT1G15640	transmembrane protein;(source:Araport11)	NA	1.86663114937846	0.0460065994497389
AT1G15670	Encodes a member of a family of F-box proteins, called the KISS ME DEADLY (KMD) family, that targets type-B ARR proteins for degradation and is involved in the negative regulation of the cytokinin response. Also named as KFB1, a member of a group of Kelch repeat F-box proteins that negatively regulate phenylpropanoid biosynthesis by targeting the phenypropanoid biosynthesis enzyme phenylalanine a…	KFB01,KMD2	1.67739754151865	3.9927015635709e-66
AT1G15700	One of two genes that encode the gamma subunit of Arabidopsis chloroplast ATP synthase. It is thought to be involved in the regulation of the ATP synthase activity.	ATPC2	0.616067891533308	0.0030836342709204
AT1G15740	Leucine-rich repeat family protein;(source:Araport11)	NA	0.64262491818628	1.57695123390129e-20
AT1G15800	hypothetical protein;(source:Araport11)	NA	0.438954602761371	0.0327735479475468
AT1G15810	S15/NS1, RNA-binding protein;(source:Araport11)	NA	0.446305703171446	0.000916561610286214
AT1G15880	Golgi SNARE 11 protein (GOS11)	atgos11,GOS11	0.504307834735637	1.67467192212178e-05
AT1G15885	hypothetical protein;(source:Araport11)	NA	2.14217618041619	0.0271013955576951
AT1G15890	Disease resistance protein (CC-NBS-LRR class) family;(source:Araport11)	NA	0.731670454951086	0.0029211036860032
AT1G15910	Belongs to a subgroup of SGS3-like proteins that act redundantly in RNA-directed DNA methylation: AT1G15910 (FDM1), AT4G00380 (FDM2), AT3G12550 (FDM3), AT1G13790 (FDM4), AT1G80790 (FDM5).	FDM1,IDNL1,IDP1	1.08686883749587	3.75465055038376e-16
AT1G15930	Ribosomal protein L7Ae/L30e/S12e/Gadd45 family protein;(source:Araport11)	NA	0.448416018692585	2.92808404354654e-06
AT1G16110	Encodes a WAK-like receptor-like kinase with a cytoplasmic Ser/Thr protein kinase domain and an extracellular domain with EGF-like repeats. It has been shown to be localized to the cell wall.	WAKL6	2.54197257639326	2.08253660935266e-19
AT1G16160	WAK-like kinase The mRNA is cell-to-cell mobile.	WAKL5	1.24994053360177	0.0230942026132974
AT1G16170	ephrin-A3 protein;(source:Araport11)	NA	0.695256823041967	6.58938555555524e-10
AT1G16180	Serinc-domain containing serine and sphingolipid biosynthesis protein;(source:Araport11)	NA	0.412267962975358	2.1020986542517e-06
AT1G16240	Encodes one of 24 Arabidopsis syntaxins. Its mRNA has been shown to be expressed.	ATSYP51,SYP51	0.909168823238391	3.3695267627655e-25
AT1G16250	Galactose oxidase/kelch repeat superfamily protein;(source:Araport11)	NA	0.830814734226151	3.16229226443807e-09
AT1G16340	Encodes a protein with putative 3-deoxy-D-manno-octulosonic acid 8-phosphate synthetase activity. This gene share a very high sequence homology with its homologue AtkdsA1 (AT1G79500).	AtKDO8PS,ATKDSA2,ATKSDA	0.655964802399749	0.00493392561828182
AT1G16370	organic cation/carnitine transporter 6;(source:Araport11)	ATOCT6,OCT6	1.29471641616694	6.54651832672636e-13
AT1G16390	organic cation/carnitine transporter 3;(source:Araport11)	ATOCT3	1.06518266510352	6.11670281239777e-10
AT1G16460	encodes a cytoplasmic thiosulfate:cyanide sulfurtransferase, activity of which increased the rhodanese activity of transgenic yeast. Can also act as a mercaptopyruvate sulfurtransferase.	ATMST2,ATRDH2,MST2,RDH2,ST2,STR2	0.231393190830012	0.0367033668930027
AT1G16560	Per1-like family protein;(source:Araport11)	NA	0.446730651022859	7.906938539767e-08
AT1G16570	Encodes a encodes a putative UDP-glycosyltransferase superfamily protein belonging to the glycosyltransferase (GT) family 33 that is localized to the endoplasmic reticulum. Loss of function alleles are male sterile, with pollen tubes bursting after germination. Loss of function also causes increased callose deposition in the female gametophyte, pollen tube overgrowth and reduced transmission.	TUN	0.480406055370014	0.000912050153026326
AT1G16670	Encodes a cold-activated plasma membrane protein cold-responsive protein kinase that phosphorylates 14-3-3 proteins. The phosphorylated 14-3-3 proteins shuttle from the cytosol to the nucleus, where they interact with and destabilize the key cold-responsive C-repeat-binding factor (CBF) proteins, modulate CBF stability and the response to cold stress.	CRPK1	0.413841623293599	0.0183408873769256
AT1G16810	7-dehydrocholesterol reductase-like protein;(source:Araport11)	NA	0.480900927685358	0.0354612789601851
AT1G16860	Plasma membrane-localized proteins that negatively regulate cellulose synthesis by inhibiting the exocytosis of CESAs.	SHOU4L	0.329370010897907	0.000188348405503294
AT1G16890	UBC36/UBC13B encodes a protein that may play a role in DNA damage responses and error-free post-replicative DNA repair. It can bind to the MMZ/UEV1 proteins in vitro.	AtUBC36,UBC13B,UBC36	0.311374022079817	0.000372955276927631
AT1G16916	transmembrane protein;(source:Araport11)	NA	1.2400619148729	0.00159906511523308
AT1G16920	small GTP-binding protein (Rab11)similar to YPT3/RAB11 proteins in yeast and mammals, respectively. YPT3/RAB11 is involved in intracellular protein trafficking.	ATRABA1B,BEX5,RAB11,RABA1b	0.742738273196414	8.77799776623296e-12
AT1G16930	F-box/RNI-like/FBD-like domains-containing protein;(source:Araport11)	NA	0.674018982472119	9.5628240477799e-07
AT1G17060	Encodes a protein with similarity to other cytochrome P450's and is a homolog of BAS1. Over expression causes a dwarf phenotype resembling brassinolide resistant mutants. Double mutant analysis of sob7/bas1 loss of function mutants suggests these genes have redundant functions in light responsiveness. SOB7 may function in metabolizing brassinolides. Expressed in leaf, root, stem and silique but e…	CHI2,CYP72C1,SHK1,SOB7	0.958443326165505	3.06037301247139e-18
AT1G17080	Ribosomal protein L18ae family;(source:Araport11)	NA	0.264256179628524	0.0454816650604152
AT1G17110	Encodes a ubiquitin-specific protease, and its activity has been confirmed in an in vitro assay. ubp15 mutants have defects in cell proliferation, and the associated processes of leaf, root, stem, flower, and silique development. UBP15 can be found in the nucleus and cytoplasm in transient assays. Though UBP15 is expressed in many tissues, UBP15 transcript levels are higher in rosette leaves and …	UBP15	0.208726567886987	0.0170788574986579
AT1G17120	Encodes a member of the cationic amino acid transporter (CAT) subfamily of amino acid polyamine choline transporters. Does not mediate efficient uptake of basic amino acids in yeast or Xenopus systems but can transport neutral and acidic amino acid analogs.	CAT8	0.52776143337687	2.54614907011002e-07
AT1G17145	RING/U-box superfamily protein;(source:Araport11)	NA	0.689973170225243	1.17327199424464e-06
AT1G17160	RBSK is a plastid localized ribokinase involved in nucleoside metabolism. It is the only member of this gene family in Arabidopsis.	RBSK	0.767431581227448	3.84906806633597e-07
AT1G17230	Leucine-rich receptor-like protein kinase family protein;(source:Araport11)	NA	0.863676822220592	2.85990804008647e-14
AT1G17270	O-fucosyltransferase family protein;(source:Araport11)	NA	0.46907306725552	0.010718990541287
AT1G17300	hypothetical protein;(source:Araport11)	NA	3.2660132664067	2.43701693206471e-05
AT1G17345	SAUR-like auxin-responsive protein family;(source:Araport11)	SAUR77	1.14260435415205	6.65880752741028e-05
AT1G17410	Nucleoside diphosphate kinase family protein;(source:Araport11)	NA	0.533437013170141	0.0119467847896029
AT1G17430	alpha/beta-Hydrolases superfamily protein;(source:Araport11)	NA	1.31527880885835	5.48809261377312e-14
AT1G17450	B-block binding subunit of TFIIIC;(source:Araport11)	NA	0.26072052132844	0.0032183036496161
AT1G17470	Encodes a member of the DRG (developmentally regulated G-protein) family expressed throughout the plant, with highest expression in actively growing tissues. Has GTPase activity.	ATDRG,ATDRG1,DRG1,Drg1-2	0.970076823503578	2.98404549444897e-23
AT1G17500	ATPase E1-E2 type family protein / haloacid dehalogenase-like hydrolase family protein. ALA4 acts redundantly with ALA3, ALA5, ALA9, ALA10 and ALA11 in root and shoot development	NA	0.726148672183199	2.16715542947044e-22
AT1G17520	Single Myb Histone (SMH) gene family member. Contains terminal acidic SANT domain.	NA	0.458068178506179	0.00767304947498493
AT1G17530	Encodes a translocase of inner mitochondrial membrane.	ATTIM23-1,TIM23-1	1.22607421317308	5.69224378038516e-23
AT1G17610	TN-type protein that controls temperature-dependent growth and defense responses .Mutant accumulates steryl-esters at low temperatures and shows temperature dependent activation of defense responses..	CHS1	2.00162182158899	9.11677416784454e-07
AT1G17620	Late embryogenesis abundant (LEA) hydroxyproline-rich glycoprotein family;(source:Araport11)	NA	0.575728784090863	9.29249948222295e-05
AT1G17665	CA-responsive protein;(source:Araport11)	NA	0.90666685685501	0.00135039809157373
AT1G17745	encodes a 3-Phosphoglycerate dehydrogenase The mRNA is cell-to-cell mobile.	PGDH,PGDH2	0.331819598553022	0.000897893478365217
AT1G17810	beta-tonoplast intrinsic protein (beta-TIP) mRNA, complete	BETA-TIP,TIP3.2,TIP3	4.17888302628042	5.6935513881462e-16
AT1G17960	Threonyl-tRNA synthetase;(source:Araport11)	NA	0.479140002290503	0.0468635111506449
AT1G18160	required for ABA- and osmotic-stress-MAP3 kinase required for activation of SnRK2 kinases, enabling robust ABA and osmotic stress signal transduction.	NA	0.479714433031184	4.96710863283349e-10
AT1G18200	Rab GTPase-like A1I protein;(source:Araport11)	AtRABA6b,RABA6b	1.05023324586401	0.00370082086497055
AT1G18260	Encodes an Arabidopsis homolog of the yeast Hrd3/mammlian Sel1L protein. Involved in ERAD (Endoplasmic reticulum-associated degradation).	EBS5,HRD3A	0.474871349905463	5.97381835509104e-08
AT1G18270	ketose-bisphosphate aldolase class-II family protein;(source:Araport11)	NA	0.889316932684766	3.53101813367187e-25
AT1G18280	Bifunctional inhibitor/lipid-transfer protein/seed storage 2S albumin superfamily protein;(source:Araport11)	LTPG3	1.54006974292996	0.0118793200375225
AT1G18290	PADRE protein up-regulated after infection by S. sclerotiorum.	NA	0.880861752774147	0.0339827679981389
AT1G18450	Encodes a gene similar to actin-related proteins in other organisms. Member of nuclear ARP family of genes. Component of chromatin remodeling complexes, involved in chromatin-mediated gene regulation. Phenotype of the arp4-1 mutant allele revealed partial sterility due to defects in anther development. Targeting the distinct, 3' UTR of AtARP4 transcripts with RNA interference caused a drastic red…	ARP4,ATARP4	0.39479416169593	1.64352068006466e-05
AT1G18470	Putative C3HC4 zinc-finger ubiquitin E3 ligase that is induced by ABA and plays a positive role in ABA signaling.	NA	0.421604491109164	4.37504060332492e-06
AT1G18500	Encodes an active Arabidopsis isopropylmalate synthase IPMS1. Involved in leucine biosynthesis. Do not participate in the chain elongation of glucosinolates. Expressed constitutively throughout the plant. Loss of IPMS1 can be compensated by a second isopropylmalate synthase gene IPMS2 (At1g74040). The mRNA is cell-to-cell mobile.	IPMS1,MAML-4	0.465792152062935	3.84379205047893e-06
AT1G18570	Encodes a member of the R2R3-MYB transcription family. Involved in indole glucosinolate biosynthesis. The mRNA is cell-to-cell mobile.	AtMYB51,BW51A,BW51B,HIG1,MYB51	0.773754759630952	2.62968511231556e-07
AT1G18670	Encodes a cyclin-dependent kinase-like protein with a ser/thr protein kinase domain and an N-terminal myristoylation sequence. Mutants in this gene are unable to express female sterility in response to beta-aminobutyric acid, as wild type plants do.	IBS1	0.326856988606611	0.0400106076044079
AT1G18680	HNH endonuclease domain-containing protein;(source:Araport11)	M20	0.641148405670028	0.0398199542936764
AT1G18690	Galactosyl transferase GMA12/MNN10 family protein;(source:Araport11)	XXT4	0.608501317484542	0.000242255372204653
AT1G18700	DNAJ heat shock N-terminal domain-containing protein;(source:Araport11)	NA	0.481635858168888	1.17864426513379e-07
AT1G18773	acyl thioesterase-like protein;(source:Araport11)	NA	1.46863094054491	7.6594044622251e-09
AT1G18840	Member of IQ67 (CaM binding) domain containing family.	IQD30	0.283787701431959	0.0186903144197572
AT1G19110	inter-alpha-trypsin inhibitor heavy chain-like protein;(source:Araport11)	NA	0.774324232920496	4.80584535357247e-28
AT1G19130	RmlC-like jelly roll fold protein;(source:Araport11)	NA	0.482156156451135	0.000200828053585542
AT1G19170	Pectin lyase-like superfamily protein;(source:Araport11)	NA	0.373247078514142	0.0125355486864314
AT1G19220	Encodes an auxin response factor that contains the conserved VP1-B3 DNA-binding domain at its N-terminus and the Aux/IAA-like domains III and IV present in most ARFs at its C-terminus. The protein interacts with IAA1 (yeast two hybrid) and other auxin response elements such as ER7 and ER9 (yeast one hybrid). ARF19 protein can complement many aspects of the arf7 mutant phenotype and , together wit…	ARF11,ARF19,IAA22	0.351789333328108	0.00121809279998652
AT1G19300	The PARVUS/GLZ1 gene encodes a putative family 8 glycosyl transferase that contributes to xylan biosynthesis. Its gene expression shows good co-variance with the IRX3 gene involved in secondary cell wall synthesis. PARVUS/GLZ1 is predicted to have galacturonosyltransferase activity and may be involved in the formation of the complex oligosaccharide sequence present at the reducing end of xylan. P…	ATGATL1,GATL1,GLZ1,PARVUS	1.00017177162124	4.67805268208727e-11
AT1G19310	RING/U-box superfamily protein;(source:Araport11)	NA	0.733019604766211	3.07285970655584e-06
AT1G19330	Evening-expressed key component of Sin3-HDAC complex, which bind directly to the CIRCADIAN CLOCK ASSOCIATED 1 (CCA1) and PSEUDO-RESPONSE REGULATOR 9 (PRR9) promoters and catalyze histone 3 (H3) deacetylation at the cognate regions to repress expression, allowing the declining phase of their expression at dusk.	AFR2	0.961432900970079	4.01617247788653e-07
AT1G19340	Methyltransferase MT-A70 family protein;(source:Araport11)	NA	1.11769152230415	0.00031729486962047
AT1G19350	Encodes brassinosteroid (BR) signalling protein that accumulates in the nucleus as dephosphorylated form in response to BRs. Is phosphorylated by the BIN2 GSK3 kinase. It synergistically interacts with BIM1 to bind to E box sequences (CANNTG). The protein contains a nuclear localization signal (NLS), followed by a highly conserved amino-terminal domain (N) shared by all family members, a BIN2 pho…	BES1,BZR2	0.725393077296432	9.59418715433912e-14
AT1G19360	Encodes an arabinosyltransferase that modifies extensin proteins in root hair cells.	RRA3	0.57582932299519	5.07819607198581e-09
AT1G19370	membrane protein;(source:Araport11)	NA	0.609439422115045	1.1649987556527e-07
AT1G19380	sugar, putative (DUF1195);(source:Araport11)	NA	1.63830746329798	2.86492024535154e-09
AT1G19397	transmembrane protein;(source:Araport11)	NA	0.95952953745843	0.000858311835889578
AT1G19400	Tail-anchored (TA) OEP membrane protein which possesses a single C-terminal transmembrane domain targeting post-translationally to plastids.	E-4PDHase	0.908522160328989	2.99905783640219e-21
AT1G19430	S-adenosyl-L-methionine-dependent methyltransferases superfamily protein;(source:Araport11)	NA	0.373069440463407	0.00119140133599913
AT1G19485	Transducin/WD40 repeat-like superfamily protein;(source:Araport11)	NA	0.302945739789401	0.0302058097333716
AT1G19530	Direct target of RGA, plays an essential role in GA-mediated tapetum and pollen development.	NA	2.85285782604871	3.80133384509235e-54
AT1G19540	NmrA-like negative transcriptional regulator family protein;(source:Araport11)	NA	2.17731549273201	2.98559524801631e-54
AT1G19600	pfkB-like carbohydrate kinase family protein;(source:Araport11)	NA	0.99141861649777	1.32486906639304e-26
AT1G19610	Predicted to encode a PR (pathogenesis-related) protein. Belongs to the plant defensin (PDF) family with the following members: At1g75830/PDF1.1, At5g44420/PDF1.2a, At2g26020/PDF1.2b, At5g44430/PDF1.2c, At2g26010/PDF1.3, At1g19610/PDF1.4, At1g55010/PDF1.5, At2g02120/PDF2.1, At2g02100/PDF2.2, At2g02130/PDF2.3, At1g61070/PDF2.4, At5g63660/PDF2.5, At2g02140/PDF2.6, At5g38330/PDF3.1 and At4g30070/PDF…	LCR78,PDF1.4	0.57095290896483	0.0162150190909289
AT1G19660	Wound-responsive family protein;(source:Araport11)	AtBBD2,BBD2	0.282341728043223	0.0015521825186037
AT1G19680	RING/U-box superfamily protein;(source:Araport11)	NA	0.987696016423364	3.36610797430684e-28
AT1G19790	A member of SHI gene family. Arabidopsis thaliana has ten members that encode proteins with a RING finger-like zinc finger motif. Despite being highly divergent in sequence, many of the SHI-related genes are partially redundant in function and synergistically promote gynoecium, stamen and leaf development in Arabidopsis.	SRS7	1.69316874898237	0.0237012513930369
AT1G19830	SAUR-like auxin-responsive protein family;(source:Araport11)	SAUR54	3.75234763481636	1.02956951856171e-08
AT1G19835	TCS1 encodes a coiled-coil domain protein that binds to microtubules and co-localizes with the cortical microtubules. Mutants have defects in trichome branching and hypocotyl elongation. TCS1 interacts with ZWI and appears to be involved in microtubule assembly.	TCS1	0.660097946060676	7.42948849700278e-17
AT1G19840	SAUR-like auxin-responsive protein family;(source:Araport11)	SAUR53	1.52941578171799	1.27858357288624e-05
AT1G19850	Encodes a transcription factor (IAA24) mediating embryo axis formation and vascular development. Similar to AUXIN RESPONSIVE FACTOR 1 (ARF1) shown to bind to auxin responsive elements (AREs), and to the maize transcriptional activator VIVIPAROUS 1( VP1). In situ hybridization shows expression in provascular tissue of embryos, the emerging shoot primordia, then is restricted to provascular tissue,…	ARF5,IAA24,MP	0.253198604411277	0.0184407169288715
AT1G19870	Encodes a microtubule-associated protein.Member of IQ67 (CaM binding) domain containing family.	IQD32	0.701231213942362	5.16605488812527e-15
AT1G19880	Encodes a regulator of chromatin condensation 1 (RCC1) family protein; confers plasticity of rosette diameter in response to changes in N availability.	NA	0.266038407487722	0.0098058831608194
AT1G19910	vacuolar H+-pumping ATPase 16 kDa proteolipid (ava-p2)	ATVHA-C2,AVA-2PE,AVA-P2	0.408491980928682	7.19144017954763e-10
AT1G20010	beta tubulin	TUB5	1.15946555358577	1.21157710344783e-32
AT1G20050	C-8 sterol isomerase that also plays a role in miRNA function.	HYD1,MAD4	0.757896164658747	1.47426410516269e-23
AT1G20110	Encodes a protein that is localized to the peripheral membrane of late endosomal compartments. Involved in the regulation of mulitivesicular/prevacuolar compartment protein sorting. Loss of function mutations are embryo lethal. Regulates IRT1-dependent metal transport and metal homeostasis. The mRNA is cell-to-cell mobile.	FREE1,FYVE1	0.183618630083874	0.0148758203007458
AT1G20160	Encodes two isoforms. One (SBT5.2(a) ) is a secreted, cell wall localized subtilisin-like serine protease that is involved in regulation of stomatal development. The second isoform (SBT5.2(b) is localized to endosomes.	ATSBT5.2,CRSP,SBT5.2(a),SBT5.2(b)	0.946258025082058	3.06077219470214e-26
AT1G20190	member of Alpha-Expansin Gene Family. Naming convention from the Expansin Working Group (Kende et al, 2004. Plant Mol Bio)	ATEXP11,ATEXPA11,ATHEXP_ALPHA_1.14,EXP11,EXPA11	3.00462210003485	1.21148041529438e-80
AT1G20430	hypothetical protein;(source:Araport11)	NA	0.487443788769358	0.0427216762531313
AT1G20460	NADH-ubiquinone oxidoreductase chain;(source:Araport11)	NA	0.573126896238186	0.00254623840253916
AT1G20520	DUF241 domain protein, putative (DUF241);(source:Araport11)	NA	3.42943866654043	0.00594155513603757
AT1G20540	Transducin/WD40 repeat-like superfamily protein;(source:Araport11)	NA	0.571150219620972	5.3522432348004e-05
AT1G20620	Catalase, catalyzes the breakdown of hydrogen peroxide (H2O2) into water and oxygen. The mRNA is cell-to-cell mobile.	ATCAT3,CAT3,SEN2	1.29673929501762	8.66821137762948e-52
AT1G20630	Catalyzes the reduction of hydrogen peroxide using heme group as cofactor. Protects cells from toxicity by H2O2.	CAT1	0.421179726738037	5.99035744705188e-05
AT1G20650	Protein kinase superfamily protein;(source:Araport11)	ASG5	0.30265313419157	0.00515450207881086
AT1G20691	Natural antisense transcript overlaps with AT1G20690;(source:Araport11)	NA	1.27672029488973	8.61349530669412e-12
AT1G20693	Encodes a protein belonging to the subgroup of HMGB (high mobility group B) proteins that have a distinctive DNA-binding motif, the HMG-box domain. The motif confers non-sequence specific interaction with linear DNA and structure-specific binding to distorted DNA sites. The HMGB proteins are involved in the assembly of nucleoprotein complexes. Can be phosphorylated by CK2alpha. The mRNA is cell-t…	HMG_BETA_1,HMGB2,NFD02,NFD2	1.10233332794123	3.51460680957887e-16
AT1G20696	Encodes a protein belonging to the subgroup of HMGB (high mobility group B) proteins that have a distinctive DNA-binding motif, the HMG-box domain. The motif confers non-sequence specific interaction with linear DNA and structure-specific binding to distorted DNA sites. The HMGB proteins are involved in the assembly of nucleoprotein complexes. Can be phosphorylated by CK2alpha. The mRNA is cell-t…	HMGB3,NFD03,NFD3	0.495254350077603	0.000848513650608921
AT1G20760	EH domain containing protein.	AtEH1	0.305103647995025	3.86350676019138e-05
AT1G20770	coiled-coil protein;(source:Araport11)	NA	0.551708481525275	0.00742129592874831
AT1G20790	F-box family protein;(source:Araport11)	NA	5.74802291180863	3.76374816878098e-05
AT1G20840	The protein encoded by this gene is found in the tonoplast (vacuole membrane) of Arabidopsis cells. The gene is expressed at highest levels in juvenile (sink) and adult (source) leaves, followed by flower tissues.	AtTMT1,TMT1	0.666721360018156	2.51020235371331e-17
AT1G20880	RNA-binding (RRM/RBD/RNP motifs) family protein;(source:Araport11)	NA	0.305122825717018	0.0143317912716302
AT1G20900	Encodes an AT hook domain containing protein that acts redundantly with SOB3 to modulate hypocotyl growth inhibition in response to light.	AHL27,ESC,ORE7	0.367649929490897	0.00266361334241635
AT1G20920	P-loop containing nucleoside triphosphate hydrolases superfamily protein;(source:Araport11)	RCF1	0.592230215367329	8.69191579715198e-10
AT1G20980	Encodes a nuclear plant-specific protein with features characteristic of a transcriptional regulator, including a nuclear localization signal sequence, a plant-specific DNA binding domain (the SBP box), and a protein interaction motif (ankyrin repeats). It unctions as a transcriptional regulator that plays a role not only in sensitivity to FB1, but also in the development of normal plant architec…	ATSPL14,FBR6,SPL14,SPL1R2	0.266921398239824	0.00130472298782582
AT1G21000	PLATZ transcription factor family protein;(source:Araport11)	NA	0.532047836258516	1.32469072699293e-07
AT1G21050	MIZU-KUSSEI-like protein (Protein of unknown function, DUF617);(source:Araport11)	NA	1.72516123480265	1.27787226985474e-57
AT1G21070	Nucleotide-sugar transporter family protein;(source:Araport11)	URGT2	0.649998545323184	1.20207763280543e-05
AT1G21100	O-methyltransferase family protein;(source:Araport11)	IGMT1	0.568404873281547	0.000106820158586565
AT1G21360	glycolipid transfer protein 2;(source:Araport11)	GLTP2	2.01054418185546	2.19530281524949e-06
AT1G21370	transmembrane protein;(source:Araport11)	NA	0.418521287725451	0.00185972731346024
AT1G21400	Thiamin diphosphate-binding fold (THDP-binding) superfamily protein;(source:Araport11)	NA	2.90676336120865	3.62731489137564e-139
AT1G21440	Phosphoenolpyruvate carboxylase family protein;(source:Araport11)	NA	0.74746833619025	4.49214490446529e-05
AT1G21540	AMP-dependent synthetase and ligase family protein;(source:Araport11)	NA	0.725231356198758	0.0421557820307327
AT1G21610	wound-responsive family protein;(source:Araport11)	UBN1	0.325704571164673	0.00614995670916837
AT1G21651	zinc ion binding protein;(source:Araport11)	NA	0.447200369125968	0.00817858449280213
AT1G21680	DPP6 N-terminal domain-like protein;(source:Araport11)	NA	1.02562663287213	1.58969515002711e-26
AT1G21730	P-loop containing nucleoside triphosphate hydrolases superfamily protein;(source:Araport11)	Kin7.1	0.525530759126922	2.05403770450266e-06
AT1G21740	DUF630 family protein, putative (DUF630 and DUF632);(source:Araport11)	NA	0.406497377793439	0.0118663718872135
AT1G21750	Encodes a protein disulfide isomerase-like (PDIL) protein, a member of a multigene family within the thioredoxin (TRX) superfamily; isoform contains non-consensus GA donor splice site at intron 9. Transcript levels for this gene are up-regulated in response to three different chemical inducers of ER stress (dithiothreitol, beta-mercaptoethanol, and tunicamycin). Neither AtIRE1-2 nor AtbZIP60 appe…	ATPDI5,ATPDIL1-1,PDI5,PDIL1-1	0.211588789290965	0.00684733794775858
AT1G21770	Acyl-CoA N-acyltransferases (NAT) superfamily protein;(source:Araport11)	NA	1.0260744115388	4.60075849285095e-28
AT1G21780	BTB/POZ domain-containing protein. Contains similarity to gb:AJ000644 SPOP (speckle-type POZ protein) from Homo sapiens and contains a PF:00651 BTB/POZ domain. ESTs gb:T75841, gb:R89974, gb:R30221, gb:N96386, gb:T76457, gb:AI100013 and gb:T76456 come from this gene;supported by full-length. Interacts with CUL3A and CUL3B.	NA	0.589020851516066	4.46252095224938e-11
AT1G21830	hypothetical protein;(source:Araport11)	NA	0.606245642351495	5.14725912065038e-07
AT1G21920	MRF1 is related to SET7/9 proteins but contains an atypical SET domain. It is expressed in phloem and mutants have a weak late flowering phenotype. Phosphatidylinositol 4-phosphate 5-kinase (PIP5K) enzyme family member.	MRF1	0.267544455617421	0.000546471874673214
AT1G21930	transmembrane protein;(source:Araport11)	NA	0.825341979832514	0.013212099251338
AT1G21980	Type I phosphatidylinositol-4-phosphate 5-kinase. Preferentially phosphorylates PtdIns4P. Induced by water stress and abscisic acid in Arabidopsis thaliana. Expressed in procambial cells of leaves, flowers and roots. A N-terminal Membrane Occupation and Recognition Nexus (MORN)affects enzyme activity and distribution.	ATPIP5K1,ATPIPK1,PIP5K1	1.54165238372255	1.44574023769166e-46
AT1G22040	Galactose oxidase/kelch repeat superfamily protein;(source:Araport11)	NA	0.491722796891841	0.000115806122883772
AT1G22110	structural constituent of ribosome;(source:Araport11)	NA	1.32938397179398	0.0187049403068243
AT1G22190	The gene encodes a putative transcription factor belongings to the abiotic stress-associated DREB A-6 clade. The mRNA is cell-to-cell mobile.	RAP2.4,WIND2	0.408582795551174	2.18988350367678e-05
AT1G22270	Encodes SMO2 (Small Organ 2). Modulates progression of cell division during organ growth.	AtTRM112b,TRM112b	0.35347292443369	0.0428695792639019
AT1G22280	Encodes a phytochrome-associated protein, PAPP2C (phytochrome-associated protein phosphatase type 2C). PAPP2C interacts in the nucleus with phyA (phytochrome A) and phyB. Functions as a regulator of phytochrome-interacting factor PIF3 by dephosphorylating phytochromes in the nucleus.	PAPP2C	0.443770011010761	0.000773734259888122
AT1G22300	Encodes a 14-3-3 protein. This protein is reported to interact with the BZR1 transcription factor involved in brassinosteroid signaling and may affect the nucleocytoplasmic shuttling of BZR1. Might act as a stabilization factor to mediate the oligomerization of REM on the plasma membrane.	14-3-3EPSILON,GF14_EPSILON,GRF10	0.220567488178246	0.00297116594591026
AT1G22330	RNA-binding (RRM/RBD/RNP motifs) family protein;(source:Araport11)	NA	0.691562143863812	0.000120488573293033
AT1G22360	UDP-glucosyl transferase 85A2;(source:Araport11)	AtUGT85A2,UGT85A2	0.541960179450885	2.35624965147497e-08
AT1G22450	subunit 6b of cytochrome c oxidase	ATCOX6B2,COX6B	0.227336877854025	0.0324841483078174
AT1G22490	basic helix-loop-helix (bHLH) DNA-binding superfamily protein;(source:Araport11)	bHLH094,bHLH94	1.30719340096983	0.00368240708585073
AT1G22500	Gene encodes a putative C3HC4-type RING zinc finger factor. it is induced in response to light and ascorbate stimulus.	AtATL15,ATL15	1.26963110450637	9.70505394697594e-28
AT1G22530	PATLs belong to a family of proteins having a Golgi dynamics (GOLD) domain in tandem with the Sec14p-like domain. PATLs are auxin regulated. Quadruple mutants (patl2456) show altered PIN1 lateralization in root endodermis cells.	PATL2	0.610250951039387	1.1234985704937e-09
AT1G22730	MA3 domain-containing protein;(source:Araport11)	MRF2	0.420695796460009	7.15270832303913e-06
AT1G22740	GTP-binding protein Rab7	ATRABG3B,RAB7,RAB75,RABG3B	0.685971321727266	0.000174248779859101
AT1G22790	Low affinity potassium transport system protein;(source:Araport11)	NA	0.878257048957931	2.69437836530755e-10
AT1G22870	One of two paralogs in Arabidopsis.Loss of both SCYL2B and SCYL2A results in severe growth defects.	SCYL2A	0.285690943974394	0.0172893766631105
AT1G22880	cellulase 5;(source:Araport11)	ATCEL5,ATGH9B4,CEL5	0.827568291881146	0.00445342737844475
AT1G22910	RNA-binding (RRM/RBD/RNP motifs) family protein;(source:Araport11)	NA	0.702163597070018	3.40217075227715e-09
AT1G22930	T-complex protein 11;(source:Araport11)	NA	0.192310156047141	0.00867682990058991
AT1G22940	Encodes a bifunctional enzyme required for thiamine (vitamin B1) biosynthesis. TH1 can phosphorylate HMP-P to produce HMP-PP, the pyrimidine heterocyclic subunit of thiamine. TH1 also catalyzes the condensation of HMP-PP and HET to form thiamine monophosphate (TMP). TH1 also appears capable of phosphorylating HMP based on E.coli mutant complementation assays. th1 mutants are thiamine auxotrophs t…	TH-1,TH1,THIE	0.293629982904589	0.0189466833574089
AT1G23000	Heavy metal transport/detoxification superfamily protein;(source:Araport11)	NA	0.875755161868656	0.00160965140302521
AT1G23020	Encodes a ferric chelate reductase whose transcription is regulated by FIT1. Expressed in the root, shoot, flower and cotyledon.	ATFRO3,FRO3	0.994482862297518	5.47404680892267e-31
AT1G23040	hydroxyproline-rich glycoprotein family protein;(source:Araport11)	NA	0.441405770929768	0.0395962985754197
AT1G23052	other_RNA;(source:Araport11)	NA	3.3780507107467	4.56879471554272e-09
AT1G23060	hypothetical protein;(source:Araport11)	MDP40	3.13681415906049	3.15102772708796e-18
AT1G23080	Encodes a novel component of auxin efflux that is located apically in the basal cell and is involved during embryogenesis in setting up the apical-basal axis in the embryo. It is also involved in pattern specification during root development. In roots, it is expressed at lateral and basal membranes of provascular cells in the meristem and elongation zone, whereas in the columella cells it coincid…	ATPIN7,PIN7	0.864186297298957	4.45765639143866e-15
AT1G23160	Acyl acid amido synthetase involved in conjugation of an amino acid to a plant hormone, a reaction that regulates free hormone concentration and downstream responses. Can also conjugate chorismate, a precursor of aromatic amino acids and salicylic acid, to cysteine and glutamate, respectively.	NA	1.11138542342426	0.00373119283799094
AT1G23380	homeodomain transcription factor KNAT6, belonging to class I of KN transcription factor family (which also includes KNAT1 and KNAT2). Expression is increased in as and bop1 leaf mutants.	KNAT6,KNAT6L,KNAT6S	0.741834657905585	1.07781070853142e-06
AT1G23490	Gene encoding ADP-ribosylation factor and similar to other ARFs and ARF-like proteins. A member of ARF GTPase family. Arabidopsis has 21 known members, known to be essential for vesicle coating and uncoating and functions in GTP-binding. The gene is shown to play a role in cell division, cell expansion and cellulose production using antisense construct.	ARF1,ATARF,ATARF1,ATARFA1A	0.571548851370815	9.92505353839816e-14
AT1G23510	OBP32pep protein;(source:Araport11)	NA	4.20659472936855	0.0245742807028543
AT1G23730	beta carbonic anhydrase 3;(source:Araport11)	ATBCA3,BCA3	1.49720314407666	0.00987394865891801
AT1G23800	Encodes a mitochondrial aldehyde dehydrogenase; nuclear gene for mitochondrial product.	ALDH2B,ALDH2B7	0.218638775251165	0.0158004483615006
AT1G23820	Spermidine synthase.	SPDS1	0.203284819761581	0.0200738390456302
AT1G23840	transmembrane protein;(source:Araport11)	NA	2.05419357624475	0.00434506567962017
AT1G23850	transmembrane protein;(source:Araport11)	NA	1.01363214568157	1.21941677745671e-06
AT1G23860	Encodes a 9G8-like serine-arginine rich (SR) protein that interacts in vivo with U1-70K, a U1 small nuclear ribonucleoprotein 70-kDa protein that is involved in nuclear precursor mRNA processing. Barta et al (2010) have proposed a nomenclature for Serine/Arginine-Rich Protein Splicing Factors (SR proteins): Plant Cell. 2010, 22:2926.	At-RSZ21,RSZ21,RSZP21,SRZ-21,SRZ21	0.69732283403348	4.05026473977363e-12
AT1G23870	Encodes an enzyme putatively involved in trehalose biosynthesis. The protein has a trehalose synthase (TPS)-like domain that may or may not be active as well as a trehalose phosphatase (TPP)-like domain. The mRNA is cell-to-cell mobile.	ATTPS9,TPS9,TPS9	0.725312308610107	4.53887621489903e-22
AT1G23890	NHL domain-containing protein;(source:Araport11)	NA	0.481391928810997	0.00113796125747404
AT1G23900	Encodes large subunit of the heterotetrameric adaptor protein complex AP-1. AP-1 is required for clathrin coated vesicles budding from the trans-Golgi network or plasma membrane.	GAMMA-ADAPTIN_1,Gamma-ADR	0.466893823080352	1.19404757394182e-09
AT1G23960	hypothetical protein (DUF626);(source:Araport11)	NA	0.803050603235832	1.21137591384435e-11
AT1G24050	RNA-processing, Lsm domain-containing protein;(source:Araport11)	NA	0.586315704537808	8.28572470223106e-08
AT1G24160	triadin;(source:Araport11)	NA	0.453428616419645	0.000106109924630083
AT1G24190	Enhances AtERF7-mediated transcriptional repression. RNAi lines show ABA hypersensitivity. Interacts with ERF7 and HDA19.	ATSIN3,SIN3,SNL3	0.313700080467599	0.000183929167785435
AT1G24290	AAA-type ATPase family protein;(source:Araport11)	NA	0.799363855921045	5.81441480406723e-05
AT1G24320	Six-hairpin glycosidases superfamily protein;(source:Araport11)	NA	0.449796116452086	0.038376658607736
AT1G24510	TCP-1/cpn60 chaperonin family protein;(source:Araport11)	NA	0.166641427256747	0.0441350435437506
AT1G24560	Effector molecule of the plant-unique RAB5, ARA6. Acts in the vacuolar/endocytic trafficking pathway with canonical RAB5 and SYP. Promotes recruitment of VSP9a onto the endosome, which is required for efficient RAB5 activation. Colocalizes with RAB5 on endosomes, where it coordinates transport with canonical RAB5.	PUF2	0.330949742342554	0.00403328066198618
AT1G24764	Member of the MAP70 protein family.	ATMAP70-2,MAP70-2	0.339196121442038	0.0222111414532922
AT1G24880	Similar to bacterial lipid A biosynthetic gene.	AtLpxC2,LpxC2	1.31216817549351	2.23355763691051e-31
AT1G25055	F-box family protein;(source:Araport11)	NA	0.424929090748907	0.000332487275616384
AT1G25098	Natural antisense transcript overlaps with AT1G25097;(source:Araport11)	NA	1.21148545643236	5.99263003635779e-55
AT1G25230	Calcineurin-like metallo-phosphoesterase superfamily protein;(source:Araport11)	NA	1.63961962703965	7.20755461259323e-58
AT1G25260	Involved in male gamete development. Trans-acting factor in the assembly of the pre-60S particle.	NA	0.482868263205916	0.00121645503911383
AT1G25275	Thionin-like gene involved in resistance against the beet cyst nematode (Heterodera schachtii).	NA	0.9134512403055	0.00150475046331837
AT1G25290	Predicted to be a plastid rhomboid protease. Mutants show defects in phosphatidic acid metabolism.	ATRBL10,ATRBL7,AtRBL8,RBL10,RBL8	0.842378206803094	4.77073263824988e-07
AT1G25320	Leucine-rich repeat protein kinase family protein;(source:Araport11)	NA	1.16827511848099	1.91314934681915e-18
AT1G25470	encodes a member of the ERF (ethylene response factor) subfamily B-6 of ERF/AP2 transcription factor family. The protein contains one AP2 domain. There are 12 members in this subfamily including RAP2.11.	CRF12	0.581574902716383	3.63889503840793e-07
AT1G25480	Encodes a phosphorylation-dependent anion channel that can mediate malate release from the vacuole and is required for stomatal closure in response to abscisic acid.	ALMT4	1.15038731623182	2.8975417342995e-10
AT1G25530	Transmembrane amino acid transporter family protein;(source:Araport11)	NA	0.309706768438416	0.00960191864495807
AT1G25560	Encodes a member of the RAV transcription factor family that contains AP2 and B3 binding domains. Involved in the regulation of flowering under long days. Loss of function results in early flowering. Overexpression causes late flowering and repression of expression of FT. Novel transcriptional regulator involved in ethylene signaling. Promoter bound by EIN3. EDF1 in turn, binds to promoter elemen…	AtTEM1,EDF1,TEM1	1.74633781228966	2.28048262410367e-89
AT1G26110	Encodes Decapping 5, required for mRNA decapping, P-body formation and translational repression during postembryonic development.	DCP5	0.242686276106599	0.00043197214360516
AT1G26208	Natural antisense transcript overlaps with AT1G26210;(source:Araport11)	NA	0.827118873515983	0.00128465649009349
AT1G26260	Encodes CIB5 (cryptochrome-interacting basic-helix-loop-helix). Related to CIB1 (AT4G34530). CIB5 interacts with CRY2 and forms heterodimer with CIB1 in vitro. Regulates flowering time redundantly with CIB1.	CIB5	1.12707856992641	1.35980318518954e-05
AT1G26270	Phosphatidylinositol 3- and 4-kinase family protein;(source:Araport11)	NA	1.65533859535803	3.91967398918058e-103
AT1G26290	hypothetical protein;(source:Araport11)	NA	4.79184098162365	0.00646974367385017
AT1G26300	BSD domain-containing protein;(source:Araport11)	NA	0.566843042948278	0.00027364650335061
AT1G26440	Encodes a ureide permease, uptake assays in yeast mutants indicated the longer splice variant is a cellular importer for allantoin, uracil and xanthine. Encodes 2 splice variants, UPS5L and UPS5S, which under nonstress conditions may function in allantoin degradation for nutrient recycling, whereas under stress, both genes may be involved in vesicular export allowing allantoin translocation from …	ATUPS5,UPS5,UPS5	0.637191989904937	1.56706774900219e-07
AT1G26470	chromatin modification-like protein;(source:Araport11)	SNS1	0.563155519420503	0.00272020711141401
AT1G26580	ELM2 domain protein;(source:Araport11)	NA	0.62687124929995	6.5433646607966e-13
AT1G26640	Encodes a cytosolic isopentenyl phosphate kinase that plays an important role in regulating the formation of both MVA (mevalonic acid) and MEP (methylerythritol phosphate) pathway-derived terpenoid compounds by controlling the ratio of IP/DMAP to IPP/DMAPP. IPP and DMAPP are the universal C5 building blocks of all natural terpenoids. IPK enhances terpenoid formation by returning IP/DMAP to the te…	IPK	0.628513465374292	1.35046187653851e-05
AT1G26665	Mediator complex, subunit Med10;(source:Araport11)	NA	1.69296929709284	5.34474830553373e-91
AT1G26670	member of VTI1 Gene Family. Normally localizes to the transgolgi network and plasma membrane. A dominant mutation (zip1) alters the subcellular localization of VTI12 and suppresses loss of function mutation (zag1) of VTI11. Interacts with members of the SYP family. Involved in protein trafficking to protein storage vacuoles.	ATVTI12,VTI12,VTI1B	0.435920397473925	3.65775173003413e-05
AT1G26730	EXS (ERD1/XPR1/SYG1) family protein;(source:Araport11)	NA	1.02334662263559	0.000345942435473501
AT1G26780	Encodes LOF1 (LATERAL ORGAN FUSION1), a MYB-domain transcription factor expressed in organ boundaries. Functions in boundary specification, meristem initiation and maintenance, and organ patterning. Also see LOF2 (At1g69560).	AtMYB117,LOF1,MYB117	2.57215026343643	1.58482108164927e-09
AT1G26850	S-adenosyl-L-methionine-dependent methyltransferases superfamily protein;(source:Araport11)	NA	0.552710824110669	7.97614462955787e-15
AT1G26890	FBD, F-box and Leucine Rich Repeat domains containing protein;(source:Araport11)	NA	2.98027116513434	0.000164016784609094
AT1G26940	Cyclophilin-like peptidyl-prolyl cis-trans isomerase family protein;(source:Araport11)	NA	0.511102169207412	0.0200971634227296
AT1G26945	Encodes a basic helix-loop-helix (bHLH) protein involved in blue/far-red light signaling. Physically interacts with HFR1 and negatively regulates its activity.	KDR,PRE6	0.995803479964856	1.76474999164314e-10
AT1G26960	Encodes a homeodomain leucine zipper class I (HD-Zip I) protein. Participates in the gene regulatory network controlling root branching by mediating the regulation of LAX3 by ARF7/19.	AtHB23,HB23	1.30116575479859	3.06546212818442e-06
AT1G27000	GRIP/coiled-coil protein, putative (DUF1664);(source:Araport11)	NA	0.286120749771869	0.0193904818190108
AT1G27020	plant/protein;(source:Araport11)	NA	1.51740862289885	7.07029319545849e-15
AT1G27030	hypothetical protein;(source:Araport11)	NA	0.501120092110036	3.10919503080241e-05
AT1G27090	glycine-rich protein;(source:Araport11)	NA	0.351837274140933	1.05602231290793e-06
AT1G27130	Encodes glutathione transferase belonging to the tau class of GSTs. Naming convention according to Wagner et al. (2002). GSTU13 acts in the pathogen triggered pathway for indole glucosinolate metabolisms that involves also PENETRATION2 myrosinase. It is likely the enzyme that conjugates GSH with unstable indol-3-ylmethyl-ITCs formed upon PEN2-mediated IG hydrolysis, particularly in the branch of …	ATGSTU13,GST12,GSTU13	0.476238703764674	0.00090713603253067
AT1G27180	disease resistance protein (TIR-NBS-LRR class);(source:Araport11)	NA	0.289002628225854	0.00930815886277443
AT1G27210	ARM repeat superfamily protein;(source:Araport11)	NA	1.1530808602602	1.55255659780255e-28
AT1G27290	transmembrane protein;(source:Araport11)	NA	0.355646662612548	0.00432105363445099
AT1G27300	transmembrane protein;(source:Araport11)	NA	0.515843840010463	0.00393647163502283
AT1G27310	Encodes an ortholog of yeast NTF2, a nuclear envelop transport protein that functions as the nuclear import receptor for RanGDP, an essential player in nucleocytoplasmic transport.	NTF2A	0.386196886419517	2.30964024765968e-06
AT1G27410	DNA repair metallo-beta-lactamase family protein;(source:Araport11)	NA	0.521110354764845	0.00728911620634368
AT1G27420	Galactose oxidase/kelch repeat superfamily protein;(source:Araport11)	NA	1.3315961291599	3.30718427364139e-06
AT1G27450	Adenosine phosphoribosyl transferase(E.C:2.4.2.7), involved in the one-step salvage of adenine to AMP.	APT1,ATAPT1	0.35324112938314	0.000281132646199612
AT1G27510	Encodes one of the two plastid proteins EXECUTER (EX1, AT4G33630) and EX2 (AT1G27510). Mediates singlet oxygen induced programmed cell death.	EX2	0.336687408115875	0.000194269917217254
AT1G27520	Glycosyl hydrolase family 47 protein;(source:Araport11)	MNS5	0.920351645368911	7.2316412430821e-25
AT1G27530	ubiquitin-fold modifier-conjugating enzyme;(source:Araport11)	NA	0.392978483303932	0.0050445168297877
AT1G27540	F-box protein (DUF295);(source:Araport11)	NA	0.270009109727354	0.00320306824626113
AT1G27600	Encodes a member of the GT43 family glycosyltransferases involved in glucuronoxylan biosynthesis: AT2G37090 (IRX9) and AT1G27600 (IRX9-L or I9H, IRX9 homolog); AT4G36890 (IRX14) and AT5G67230 (IRX14-L or I14H, IRX14 homolog). They form two functionally non-redundant groups essential for the normal elongation of glucuronoxylan backbone. I9H functions redundantly with IRX9, I14H is redundant with I…	I9H,IRX9-L	0.605251730560722	3.0525868688912e-07
AT1G27620	HXXXD-type acyl-transferase family protein;(source:Araport11)	NA	0.837620776597966	0.000122917744280662
AT1G27630	cyclin T 1;(source:Araport11)	CYCT1	0.315275451903187	0.00308925624122998
AT1G27650	U2 auxiliary factor small subunit. The atU2AF35a protein and its homolog, atU2AF35b, contain most of the conserved domains of hsU2AF35, including the psiRRM, one RS domain, two zinc fingers, and the two regions for interacting with U2AF large subunit. Both proteins lack the stretch of glycines present in human U2AF35. The sequences are overall 83% identical, and each Arabidopsis homolog shows app…	ATU2AF35A	1.02597121159748	2.78945017505235e-41
AT1G27660	basic helix-loop-helix (bHLH) DNA-binding superfamily protein;(source:Araport11)	NA	1.01587724105238	0.00173837032457295
AT1G27670	transmembrane protein;(source:Araport11)	NA	2.45728718616358	2.02597127467317e-54
AT1G27750	nucleic acid binding protein;(source:Araport11)	NA	0.347483383261521	5.05918230948896e-05
AT1G27752	Ubiquitin system component Cue protein;(source:Araport11)	NA	0.474996209624211	6.38031512243788e-07
AT1G27770	Encodes a chloroplast envelope Ca2+-ATPase with an N-terminal autoinhibitor.	ACA1,PEA1	0.482672131074502	1.34323288704384e-07
AT1G27921	Natural antisense transcript overlaps with AT1G27920;(source:Araport11)	NA	0.616113183758552	7.64557573062622e-07
AT1G27980	Encodes an ER-localized sphingoid long-chain base-1-phosphate lyase involved in the dehydration stress response.	ATDPL1,DPL1	0.783141645626467	8.86741024716396e-13
AT1G28050	B-box type zinc finger protein with CCT domain-containing protein;(source:Araport11)	BBX13	0.893986109826163	2.14419374320096e-08
AT1G28150	hypothetical protein;(source:Araport11)	NA	0.453310809487446	0.00078253114036419
AT1G28230	Encodes a transporter that transports purines,cytokinins and other adenine derivatives. Expressed in the leaf hydathodes where it may be involved in re-uptake of cytokinins during guttation.	ATPUP1,PUP1	1.99668132632899	1.01563858077437e-16
AT1G28240	strawberry notch protein (DUF616);(source:Araport11)	MUCI70	0.267136146330639	0.0150930206180191
AT1G28260	Telomerase activating protein Est1;(source:Araport11)	NA	0.73411119799254	4.98471029172442e-16
AT1G28290	Encodes an atypical arabinogalactan protein that is localized to the plasma membrange. AGP31 is highly expressed in flowers and vascular tissue and is repressed by jasmonic acid. AGP31 may play a role in vascular tissue function during defense and development.	AGP31	0.480746618681713	1.47662211204845e-06
AT1G28320	Mutants in this gene are defective in the processing of pre-glyoxysomal malate dehydrogenase (pre-gMDH) to gMDH.	AtDEG15,DEG15	0.286089366705495	0.00104220310633266
AT1G28330	dormancy-associated protein (DRM1)	AtDRM1,DRM1,DYL1	3.89101245588823	0
AT1G28410	myosin heavy chain-like protein;(source:Araport11)	NA	0.717820344329825	3.04462284686608e-07
AT1G28440	HAESA-like 1;(source:Araport11)	HSL1	0.427203334919947	2.7799080939208e-07
AT1G28520	VOZ transcription factor which acts as positive regulator of several salt-responsive genes. Functionally redundant in salt stress with VOZ2.	ATVOZ1,VOZ1	0.63566442694156	1.25540105988607e-08
AT1G28580	GDSL-motif esterase/acyltransferase/lipase. Enzyme group with broad substrate specificity that may catalyze acyltransfer or hydrolase reactions with lipid and non-lipid substrates.	NA	0.248545896592144	0.00177621306727741
AT1G28960	Encodes a ppGpp pyrophosphohydrolase.	ATNUDT15,ATNUDX15,NUDX15	0.601734017421942	6.80299753109636e-07
AT1G29025	Calcium-binding EF-hand family protein;(source:Araport11)	NA	1.13715421588782	2.04705892004332e-13
AT1G29040	50S ribosomal protein L34;(source:Araport11)	NA	0.48999804085164	0.000329468147203176
AT1G29050	Encodes a member of the TBL (TRICHOME BIREFRINGENCE-LIKE) gene family containing a plant-specific DUF231 (domain of unknown function) domain. TBL gene family has 46 members, two of which (TBR/AT5G06700 and TBL3/AT5G01360) have been shown to be involved in the synthesis and deposition of secondary wall cellulose, presumably by influencing the esterification state of pectic polymers. A nomenclature…	TBL38	0.784045787386733	1.40185882899583e-09
AT1G29090	Cysteine proteinases superfamily protein;(source:Araport11)	NA	0.917062058643691	6.32191297147296e-12
AT1G29120	Hydrolase-like protein family;(source:Araport11)	UP9	0.767422213256693	2.02345824941558e-22
AT1G29195	PADRE protein up-regulated after infection by S. sclerotiorum.	NA	0.941695023337532	0.00353651562595945
AT1G29240	transcription initiation factor TFIID subunit, putative (DUF688);(source:Araport11)	NA	0.561927047939876	9.29119180650688e-05
AT1G29260	Encodes the peroxisomal targeting signal type 2 receptor that facilitates peroxisomal protein translocation. It recognizes proteins with the PTS2 consensus sequence (RLX5HL or a variant) within the first 30 or so amino acids. RNAi experiments suggest that PEX7 is necessary for the maintenance of glyoxysomal but not leaf peroxisomal function. The mRNA is cell-to-cell mobile.	ATPEX7,PEX7	0.493009412620317	1.93844843514392e-05
AT1G29280	member of WRKY Transcription Factor; Group II-e The mRNA is cell-to-cell mobile.	ATWRKY65,WRKY65	0.904492521719552	3.3332714124957e-14
AT1G29350	RNA polymerase II degradation factor-like protein (DUF1296);(source:Araport11)	NA	0.201771957370321	0.00425473508106329
AT1G29357	Natural antisense transcript overlaps with AT1G29355;(source:Araport11)	NA	0.832179674321568	3.20367414705318e-12
AT1G29370	RNA polymerase II degradation factor-like protein (DUF1296);(source:Araport11)	NA	0.296029623796474	3.29219075524703e-05
AT1G29395	Integral membrane protein in the inner envelope of chloroplasts. Provide freezing tolerance. Expression is induced by short-term cold-treatment, water deprivation, and abscisic acid treatment. involved in response to salt tolerance	COR413-TM1,COR413IM1,COR414-TM1	1.77084475822907	8.47314713488054e-11
AT1G29400	A member of mei2-like gene family, predominantly plant-based family of genes encoding RNA binding proteins with characteristic presence of a highly conserved RNA binding motif first described in the mei2 gene of the fission yeast S. pombe. In silico analyses reveal nine mei2 -like genes in A. thaliana. They were grouped into four distinct clades, based on overall sequence similarity and subfamily…	AML5,ML5	0.959218835898888	3.12390223334216e-39
AT1G29410	Encodes phosphoribosylanthranilate isomerase which catalyzes the third step in tryptophan biosynthesis.	PAI3	0.598307231101261	0.0153071855911648
AT1G29430	SAUR762 expression is induced during pollination and expressed in pollen tubes. SAUR62 likely functions in translation of proteins required for pollen tube development/function.	SAUR62	2.67549990529047	1.61242348988758e-06
AT1G29440	SAUR-like auxin-responsive protein family;(source:Araport11)	SAUR63	2.09774620481984	9.59822665718435e-07
AT1G29450	SAUR-like auxin-responsive protein family;(source:Araport11)	SAUR64	3.15157320158085	1.05398885010766e-07
AT1G29460	SAUR-like auxin-responsive protein family;(source:Araport11)	SAUR65	2.96343896348522	0.000357935327542474
AT1G29465	transmembrane protein;(source:Araport11)	NA	1.18907547927569	8.01569518646248e-05
AT1G29490	SAUR-like auxin-responsive protein family;(source:Araport11)	SAUR68	4.31349897528009	0.0108056713981824
AT1G29500	SAUR-like auxin-responsive protein family;(source:Araport11)	SAUR66	4.86649595193169	0.00255663893784867
AT1G29510	This locus was referred to as SAUR68 in PMID:17948056 but the nomenclature should be SAUR67.	SAUR67	2.09833005424847	1.76047011983159e-13
AT1G29760	Membrane protein involved in lipid droplet biogenesis primarily in pollen. The interaction motif on SEIPIN2 for VAP27-1 is restricted to the N-terminal 30 amino acids that contain an FFAT motif.	SEIPIN2	0.505338326685622	1.59090479886255e-07
AT1G29970	60S ribosomal protein L18A-1;(source:Araport11)	RPL18AA	1.03529144562977	2.34462584417536e-24
AT1G29980	choice-of-anchor C domain protein, putative (Protein of unknown function, DUF642);(source:Araport11)	NA	1.22992586070947	1.60324969974482e-21
AT1G30100	Encodes 9-cis-epoxycarotenoid dioxygenase, a key enzyme in the biosynthesis of abscisic acid. The expression of this gene increases during the first 6h of imbibition.	ATNCED5,NCED5	1.57656182020137	0.027978073872386
AT1G30200	F-box family protein;(source:Araport11)	NA	0.538000348862819	1.76545503347574e-08
AT1G30230	Encodes a guanine nucleotide exchange factor that plays an important role in translation elongation. It is localized in the plasma membrane and cytosol. Mutants display ectopic lignin deposition as well as cell expansion defects	eEF-1Bb1,EF1Bb	0.885786889731108	1.01660108870211e-45
AT1G30270	Arabidopsis thaliana CBL-interacting protein kinase 23. CIPK23 serves as a positive regulator of the potassium transporter AKT1 by directly phosphorylating AKT1. CIPK23 is activated by the binding of two calcineurin B-like proteins, CBL1 and CBL9. The mRNA is cell-to-cell mobile.	ATCIPK23,CIPK23,LKS1,PKS17,SnRK3.23	0.649898218363205	2.60343047319276e-15
AT1G30330	Encodes a member of the auxin response factor family. Mediates auxin response via expression of auxin regulated genes. Acts redundantly with ARF8 to control stamen elongation and flower maturation. Expression of ARF6 is controlled by miR167.	ARF6	0.507588722089625	8.36024590156964e-11
AT1G30570	Encodes HERCULES2 (HERK2), a receptor kinase regulated by Brassinosteroids and required for cell elongation during vegetative growth.	HERK2	0.457013473667492	1.28194392076529e-05
AT1G30590	RNA polymerase I specific transcription initiation factor RRN3 protein;(source:Araport11)	NA	0.323379146602623	0.000474027375597807
AT1G30690	Sec14p-like phosphatidylinositol transfer family protein;(source:Araport11)	PATL4	0.412324689507851	0.000204011721994111
AT1G30720	FAD-binding Berberine family protein;(source:Araport11)	AtBBE10	1.02349779350979	1.56009958724135e-12
AT1G30730	FAD-binding Berberine family protein;(source:Araport11)	AtBBE11	0.695237193231883	9.37000176587567e-05
AT1G30755	elongation factor G, putative (DUF668);(source:Araport11)	PSI2	0.462414718029474	0.00261181092797882
AT1G30820	Cytidine triphosphate synthase.	CTPS1	0.587791223109908	4.99535526288002e-08
AT1G30880	hypothetical protein;(source:Araport11)	NA	0.682156161032981	3.834141606638e-12
AT1G30910	Molybdenum cofactor sulfurase family protein;(source:Araport11)	NA	0.346091502606698	0.0158570418297314
AT1G30970	Encodes SUF4 (SUPPRESSOR of FRI 4), a putative zinc-finger-containing transcription factor that is required for delayed flowering in winter-annual Arabidopsis. suf4 mutations strongly suppress the late-flowering phenotype of FRI (FRIGIDA) mutants. suf4 mutants also show reduced H3K4 trimethylation at FLC (FLOWERING LOCUS C), a floral inhibitor. SUF4 may act to specifically recruit a putative hist…	SUF4	0.419234412558694	1.30604176236833e-07
AT1G31040	ORE15 is a nuclear localized member of the PLATZ family of transcription factors. Based on over expression and loss of function phenotypes, ORE15 functions in regulation of leaf cell proliferation and senescence.	ORE15	1.51790337143094	0.00292019357661682
AT1G31070	Encodes a protein that functions as an N-acetylglucosamine-1-phosphate uridylyltransferase that catalyzes the formation of UDP-N-acetylglucosamine (UDP-GlcNAc). This is an essential precursor for glycolipid and glycoprotein synthesis and is also used for regulatory protein modification in signaling pathways. The enzyme can also catalyze the reverse reaction using both UDP-GlcNAc and the less comm…	GLCNA.UT1,GlcNAc1pUT1	0.402796332477004	0.00312675004433699
AT1G31120	potassium transporter	KUP10	0.827471860235698	3.0108930781065e-18
AT1G31240	Bromodomain transcription factor;(source:Araport11)	NA	0.645490269310811	0.0330598920840592
AT1G31290	ARGONAUTE 3;(source:Araport11)	AGO3	0.701494655671292	7.55396334740323e-05
AT1G31350	KAR-UP F-box 1;(source:Araport11)	KUF1	0.481049056701319	0.000182633088115122
AT1G31480	encodes a novel protein that may be part of a gene family represented by bovine phosphatidic acid-preferring phospholipase A1 (PA-PLA1)containing a putative transmembrane domain. SGR2 is involved in the formation and function of the vacuole.	SGR2	0.287769181430937	0.0101220302584154
AT1G31730	Encodes a component of the AP4 complex and is involved in vacuolar sorting of storage proteins.	AP4E	0.298420310494789	2.344286984398e-05
AT1G31770	ATP-binding cassette 14;(source:Araport11)	ABCG14,AtABCG14	0.423487803066139	5.66392229423627e-08
AT1G31780	Encodes a component of the oligomeric Golgi (COG) complex. Found in pollen golgi apparatus. Loss of function results in defects in pollen tube growth resulting in lack of transmission through the pollen.	COG7	0.346296139300622	8.09498682045497e-05
AT1G31812	Acyl-CoA-binding protein. Bind acyl-CoA esters and protect acyl-CoAs from degradation by microsomal acyl-hydrolases. Plays a role in determining seed oil content.	ACBP,ACBP6,AtACBP6	1.19443494626661	1.69839845109004e-47
AT1G31814	family member of FRI-related genes that is required for the winter-annual habit. Genbank accession BK004885	FRL2	0.549194238482878	0.00226197628411716
AT1G31830	Encodes POLYAMINE UPTAKE TRANSPORTER 2, an amino acid permease family protein.	AtPUT2,PQR2,PUT2	0.495228966420677	1.7667895092653e-06
AT1G31850	S-adenosyl-L-methionine-dependent methyltransferases superfamily protein;(source:Araport11)	NA	1.07240679691568	1.82507340471061e-37
AT1G31930	Encodes XLG3 (extra-large G protein 3) that shows significant similarity to the G protein alpha subunit in its C terminal region. Involved in the regulation of root morphological and growth responses.	XLG3	0.342910938325607	0.000722088356422145
AT1G31950	Sesterterpene synthase which produces various sesterpne backbones bia type-A cyclization mechanism.	NA	0.498315063781749	0.026064204809123
AT1G32050	SCAMP family protein;(source:Araport11)	AtSCAMP5,SCAMP5	0.288042657770479	0.000404689820275515
AT1G32090	early-responsive to dehydration stress protein (ERD4);(source:Araport11)	OSCA1.8	0.399102063525868	8.53251127466109e-07
AT1G32120	serine/threonine-protein phosphatase 7 long form-like protein;(source:Araport11)	NA	0.45951730363393	0.0197924346196584
AT1G32130	The C-terminal portion of this protein has high homology to the C-termini of the IWS1 (Interacts With Spt6) proteins found in yeast and humans. Interacts with transcription factor BES1. Involved in brassinosteroid-regulated gene expression.	ATIWS1,HNI9,IWS1	0.352121574271568	0.000214733823926569
AT1G32150	Encodes a G group bZIP transcription factor family member that can bind cis elements with an ACGT core, such as G-box, Hex, C-box and As-1. The protein is localized in the nucleus and can homodimerize and can heterodimerize with other G group members.	AtbZIP68,bZIP68	0.675715797181348	7.78069055678751e-07
AT1G32170	xyloglucan endotransglycosylase-related protein (XTR4) The mRNA is cell-to-cell mobile.	XTH30,XTR4	1.99691122685553	1.46277715517593e-74
AT1G32210	Encodes protein involved in suppression of apoptosis. Complements a mammalian apoptosis suppressor mutation.	ATDAD1	0.531232762964196	0.00402994308893587
AT1G32450	Transmembrane nitrate transporter. Involved in xylem transport of nitrate from root to shoot. Induced in response to high and low concentrations of nitrate. Not involved in nitrate uptake. Expressed in root pericycle cells under the control of MYB59. Also functions as a proton-coupled H+/K+ antiporter for K+ loading into the xylem.	AtNPF7.3,NPF7.3,NRT1.5	0.875036707240805	1.70071414553735e-23
AT1G32460	hypothetical protein;(source:Araport11)	NA	0.649363529063458	2.22959277866119e-08
AT1G32640	Encodes a MYC-related transcriptional activator with a typical DNA binding domain of a basic helix-loop-helix leucine zipper motif. Binds to an extended G-Box promoter motif and interacts with Jasmonate ZIM-domain proteins. MYC2 interacts with EIN3 and EIL1 to repress hook curvature and resistance to Botrytis cinera.Its transcription is induced by dehydration stress, ABA treatment and blue light …	ATMYC2,JAI1,JIN1,MYC2,RD22BP1,ZBF1	0.422242849957912	7.1332699363269e-05
AT1G32700	PLATZ transcription factor family protein;(source:Araport11)	NA	1.27730627132266	1.68441865341357e-40
AT1G32790	RNA-binding protein, putative, similar to RNA-binding protein GB:CAB40027 GI:4539439 from (Arabidopsis thaliana).Member of a family of PAB2 binding domain proteins.	CID11	0.358214173960534	4.6663159155036e-06
AT1G33050	hypothetical protein;(source:Araport11)	NA	1.21206981630357	9.2134014962373e-57
AT1G33055	hypothetical protein;(source:Araport11)	NA	1.93371027862289	2.40084498457982e-12
AT1G33060	NAC 014;(source:Araport11)	ANAC014,NAC014	0.754202696336864	3.23876754857764e-07
AT1G33120	Ribosomal protein L6 family;(source:Araport11)	NA	0.307298877948467	0.00101840657209494
AT1G33140	Encodes ribosomal protein L9. Identified in a screen for enhancers of as1. as1/pgy double mutants show defects in leaf vascular patterning and adaxial cell fate. Double mutant analysis indicates pgy genes function in the same pathway as REV, KAN1 and KAN2. The mRNA is cell-to-cell mobile.	PGY2	0.293203229031422	0.000709112033134354
AT1G33170	S-adenosyl-L-methionine-dependent methyltransferases superfamily protein;(source:Araport11)	NA	1.19389190519176	1.84533064158314e-23
AT1G33250	beta-1,3-n-acetylglucosaminyltransferase radical fringe protein, putative (DUF604);(source:Araport11)	NA	0.304011381557307	0.00134053564004591
AT1G33265	Encodes a chloroplast membrane-localized fatty acid exporter that plays a critical roles in transporting plastid fatty acids for TAG biosynthesis during seed and embryo development.	NA	1.63179251465601	1.68251086898436e-28
AT1G33290	P-loop containing nucleoside triphosphate hydrolases superfamily protein;(source:Araport11)	NA	0.648483719845072	2.05970433343225e-10
AT1G33350	Pentatricopeptide repeat (PPR) superfamily protein;(source:Araport11)	NA	0.532500261817215	0.0186409407784506
AT1G33360	Encodes ClpX3, a subunit of the Clp protease complex.	NA	0.493908740302829	3.1405121749608e-05
AT1G33400	Encodes one of the 36 carboxylate clamp (CC)-tetratricopeptide repeat (TPR) proteins (Prasad 2010, Pubmed ID: 20856808) with potential to interact with Hsp90/Hsp70 as co-chaperones.	TPR9	0.366362610600766	0.00817858449280213
AT1G33415	Natural antisense transcript overlaps with AT1G33420 and AT1G33430;(source:Araport11)	NA	0.301033856078881	0.00682910643893927
AT1G33440	Major facilitator superfamily protein;(source:Araport11)	AtNPF4.4,NPF4.4	2.07786263184334	3.99878373847747e-20
AT1G33610	Leucine-rich repeat (LRR) family protein;(source:Araport11)	NA	0.860160379446734	2.31845170132362e-05
AT1G33615	None;(source:Araport11)	NA	0.580697060963355	0.0131783803225126
AT1G33680	KH domain-containing protein;(source:Araport11)	NA	0.428151857294154	2.3684933236685e-08
AT1G33770	Protein kinase superfamily protein;(source:Araport11)	NA	1.26894155322517	0.0185134823219523
AT1G33790	jacalin lectin family protein;(source:Araport11)	NA	1.04460162134021	4.7477261352277e-17
AT1G34110	Leucine-rich receptor-like protein kinase family protein;(source:Araport11)	RGI5	2.10831330157113	3.65510345136672e-114
AT1G34150	Pseudouridine synthase family protein;(source:Araport11)	NA	0.656139097795668	0.000393431686262362
AT1G34190	Encodes a NAC domain transcription factor that regulates the mitochondrial retrograde response and coordinates organellar functions and stress responses.	anac017,NAC017,RAO2	0.269937165557147	0.000575527691421062
AT1G34200	Glyceraldehyde-3-phosphate dehydrogenase-like family protein;(source:Araport11)	NA	0.45377691503297	0.000309317619393429
AT1G34270	Exostosin family protein;(source:Araport11)	NA	0.728671202914826	3.73808826824938e-05
AT1G34300	lectin protein kinase family protein;(source:Araport11)	NA	0.406977855807268	2.76806626864772e-06
AT1G34320	Ikzf5 (DUF668);(source:Araport11)	PSI1	0.490526659404058	2.35930351642795e-10
AT1G34355	Encodes PS1 (Parallel Spindle 1). Mutations in PS1 lead to diploid male spores, diploid pollen grains, and spontaneous triploid plants in the next generation. Female meiosis is not affected in the mutants.	ATPS1,PS1	0.49025352283805	0.0315035260032118
AT1G34370	Encodes a putative nuclear Cys(2)His(2)-type zinc finger protein involved in H+ and Al3+ rhizotoxicity. In mutants exposed to aluminum stress, there is no induction of AtALMT1, an malate transporter known to be involved in the mediation of aluminum toxicity. Cell wall of the mutant is unstable in low pH medium (pH 4.5) in low Ca solution. This would mediate Ca-alleviation of low pH stress through…	AtSTOP1,STOP1	0.840504587005935	1.71862278663392e-34
AT1G34510	Peroxidase superfamily protein;(source:Araport11)	NA	0.606444100516952	0.0147888911516789
AT1G34630	transmembrane protein;(source:Araport11)	NA	1.80291328138708	1.66730600969237e-96
AT1G34760	Encodes a 14-3-3 protein. Binds H+-ATPase in response to blue light.	GF14_OMICRON,GRF11,RHS5	1.28593916765293	7.11871942160822e-14
AT1G34844	Natural antisense transcript overlaps with AT1G34842;(source:Araport11)	NA	0.541745696929447	0.0138351664027503
AT1G35220	FAM91 carboxy-terminus protein;(source:Araport11)	NA	0.324792249910897	0.000263431878631279
AT1G35330	RING/U-box superfamily protein;(source:Araport11)	NA	0.591410804508705	0.0439819502306549
AT1G35420	alpha/beta-Hydrolases superfamily protein;(source:Araport11)	NA	1.14663753209326	1.21403782162801e-19
AT1G35430	transmembrane protein;(source:Araport11)	NA	0.633457551292479	0.0232269653937434
AT1G35516	myb-like transcription factor family protein;(source:Araport11)	NA	0.884620232434288	5.79986515107224e-10
AT1G35620	Encodes a protein disulfide isomerase-like (PDIL) protein, a member of a multigene family within the thioredoxin (TRX) superfamily. Unlike several other PDI family members, transcript levels for this gene are not up-regulated in response to three different chemical inducers of ER stress (dithiothreitol, beta-mercaptoethanol, and tunicamycin). However, the level of transcripts for this gene is sli…	ATPDI8,ATPDIL5-2,PDI8,PDIL5-2	0.304936168789282	0.006457375644364
AT1G35625	RING/U-box superfamily protein;(source:Araport11)	NA	0.567413616296261	0.029139025115873
AT1G35910	Haloacid dehalogenase-like hydrolase (HAD) superfamily protein;(source:Araport11)	AtTPPD,TPPD	4.52793255871633	0.00570787276859402
AT1G36050	Endoplasmic reticulum vesicle transporter protein;(source:Araport11)	NA	0.419343460721972	6.43357980109993e-05
AT1G36060	encodes a member of the DREB subfamily A-6 of ERF/AP2 transcription factor family. The protein contains one AP2 domain. There are 8 members in this subfamily including RAP2.4.Overexpression results in increased drought tolerance and vitrified leaves. Binds to DRE/GCC promoter elements and activates expression of aquaporin genes AtTIP1;1, AtTIP2;3, and AtPIP2;2.	TG,WIND3	1.15450752103233	2.02207357617435e-12
AT1G36070	Transducin/WD40 repeat-like superfamily protein;(source:Araport11)	NA	0.791420895838165	3.14637091707553e-10
AT1G36980	transmembrane 50A-like protein;(source:Araport11)	NA	0.426476811194693	3.51931471783626e-06
AT1G42470	Patched family protein;(source:Araport11)	AtNPC1_-_1	0.676393775577278	1.52278361829772e-14
AT1G43130	like COV 2;(source:Araport11)	LCV2	0.472529900988964	0.000317061365233913
AT1G43245	SET domain-containing protein;(source:Araport11)	NA	1.01128272911083	8.3754861977498e-13
AT1G43580	Sphingomyelin synthetase family protein;(source:Araport11)	NA	0.356473574097283	0.000158470904748622
AT1G43640	Member of TLP family of tubby like proteins that also contain an F-Box.	AtTLP5,TLP5	2.5428192400096	0.00380062636091318
AT1G43700	Encodes a VirE2-interacting protein. VIP1 mediates nuclear translocation of VirE2 via its amino half, and interacts with histone H2A via it carboxyl half. Involved in osmosensory response. The mRNA is cell-to-cell mobile.	AtVIP1,SUE3,VIP1	0.801386006271136	7.7571611147931e-17
AT1G43770	PHD finger-containing protein. Interacts with BDT1, acts with other PHD proteins to associate with flowering genes and thereby suppress their transcription.	NA	0.682551250446366	0.00692121299452543
AT1G43800	&	AAD6,FTM1,SAD6	1.71984762795737	0.000465332919185538
AT1G43890	ras-related small GTPase	ATRAB-C1,ATRAB18,ATRABC1,RAB18,RAB18-1,RABC1	0.25384921800089	0.0067410645751376
AT1G44160	HSP40/DnaJ peptide-binding protein;(source:Araport11)	NA	0.95377237250713	0.00084408159678363
AT1G44350	encodes a protein similar to IAA amino acid conjugate hydrolase. NO-induced, involved in growth and disease resistance. Plays a positive role in the activation of SAR when challenged with the avirulent pathogen Pst DC3000 (avrB) at 5 ? 106 CFU.	ILL6	0.357252985475401	0.0110187373648577
AT1G44750	Member of a family of proteins related to PUP1, a purine transporter. May be involved in the transport of purine and purine derivatives such as cytokinins, across the plasma membrane.	ATPUP11,PUP11	0.605159465180004	5.68237590328961e-11
AT1G44760	Adenine nucleotide alpha hydrolases-like superfamily protein;(source:Araport11)	NA	0.933262365574216	3.83304189576016e-10
AT1G44770	elongation factor;(source:Araport11)	NA	0.392024851343932	0.00104050274441096
AT1G44810	GeBP transcription factor required for Cd&	GPL4	0.460346598404975	0.00708535232780267
AT1G44830	Encodes a nuclear-localized member of the DREB subfamily A-5 of ERF/AP2 transcription factor family. The protein contains one AP2 domain. There are 15 members in this subfamily including RAP2.1, RAP2.9 and RAP2.10. Overexpression in cultured cells results in an increase in pectin deposition.ERF014 differentially regulates responses to bacterial and fungal pathogens.	AtERF014,ERF014	3.45118633627309	2.26816244868097e-17
AT1G45015	MD-2-related lipid recognition domain-containing protein;(source:Araport11)	NA	0.568875313766083	0.0103724148604991
AT1G45050	member of ubiquitin-conjugating E2-proteins	ATUBC2-1,UBC15	1.22240721236813	6.04409165760161e-11
AT1G45130	beta-galactosidase 5;(source:Araport11)	AtBGAL5,BGAL5	0.820744766767222	1.59325650795793e-14
AT1G45163	transmembrane protein;(source:Araport11)	NA	1.66079422564898	3.82722503077113e-15
AT1G46554	other_RNA;(source:Araport11)	NA	1.14699374859207	1.23083192572914e-14
AT1G46768	encodes a member of the DREB subfamily A-5 of ERF/AP2 transcription factor family (RAP2.1). The protein contains one AP2 domain. There are 16 members in this subfamily including RAP2.9 and RAP2.10.	RAP2.1	1.25392265851939	2.73054368123226e-11
AT1G47210	cyclin-dependent protein kinase 3;(source:Araport11)	CYCA32	0.622705990852639	1.64210056331877e-05
AT1G47270	Member of TLP family of tubby like proteins that also contain an F-Box. Localized to the plasma membrane.	AtTLP6,TLP6	1.61139008482539	1.75455830299175e-34
AT1G47310	signal peptidase I;(source:Araport11)	NA	0.446383126757665	0.000387299855916361
AT1G47420	predicted to encode subunit 5 of mitochondrial complex II and to participate in the respiratory chain	SDH5	0.298262068264148	0.00145682163914715
AT1G47640	seven transmembrane domain protein;(source:Araport11)	NA	0.31501620965292	0.000572529616962069
AT1G47670	Transmembrane amino acid transporter family protein;(source:Araport11)	NA	0.634046195372925	1.26514582948129e-07
AT1G47710	Serine protease inhibitor (SERPIN) family protein;(source:Araport11)	AtSERPIN1,SERPIN1	0.285464655454324	0.0399485717220933
AT1G48175	Cytidine/deoxycytidylate deaminase family protein;(source:Araport11)	AtTAD2,emb2191,TAD2	0.68843505201346	0.00362192408206923
AT1G48260	Encodes a member of the SNF1-related kinase (SnRK) gene family (SnRK3.21), which has also been reported as a member of the CBL-interacting protein kinases (CIPK17).	CIPK17,SnRK3.21	0.811443025955024	3.77324548703596e-06
AT1G48300	Cytosolic iron-sulfur protein with a [2Fe-2S] cluster which synthesizes triacylglycerol (DGAT activity).	DGAT3	0.953709530471368	7.92436947944943e-18
AT1G48330	SsrA-binding protein;(source:Araport11)	NA	0.946340670992557	0.00607118791666552
AT1G48370	Arabidopsis thaliana metal-nicotianamine transporter YSL4	YSL8	0.465583699024144	0.00193794604005669
AT1G48420	Encodes an enzyme that decomposes D-cysteine into pyruvate, H2S, and NH3. Only D-cysteine but not L-cysteine was converted by D-CDes to pyruvate, H2S, and NH3. There is conflicting evidence on its 1-aminocyclopropane-1-carboxylate deaminase activity. Involved in regulating ethylene levels. DCD enhances plant cadmium tolerance by promoting hydrogen sulfide production.	ACD1,ATACD1,AtDCD,D-CDES,DCD	0.606164955219065	1.51937689450174e-07
AT1G48430	Dihydroxyacetone kinase;(source:Araport11)	NA	0.991106331757368	4.35739292674797e-23
AT1G48490	Protein kinase which together with IREH1 plays an important role in controlling root skewing and maintaining the microtubule network.	NA	0.334279301478562	6.45828503475337e-06
AT1G48550	VPS26C is a component of a retromer complex, it is involved in endosome to lysosome protein transport and root hair growth.	VPS26C	1.27288636754479	2.64215168840437e-27
AT1G48620	This gene is predicted to encodes a histone H1/H5 family member. A plant line expressing an RNAi construct targeted against HON5 shows a reduced level of agrobacterium-mediated root transformation.	HON5	0.193114201368386	0.0217310167659447
AT1G48698	Potential natural antisense gene, locus overlaps with AT1G48700	NA	1.70618058816157	0.00313170136768781
AT1G48760	Encodes the putative delta subunit of the AP(adaptor protein)-3 complex and plays a role in vacuolar function.	AP-3delta,delta-ADR,PAT4	0.256816507364141	0.0127027540753826
AT1G48950	C3HC zinc finger-like protein;(source:Araport11)	NA	0.269238819138338	0.0293583433684895
AT1G49032	hypothetical protein;(source:Araport11)	NA	1.58273465891726	1.39987792592508e-20
AT1G49040	Encodes soluble protein containing N-terminal DENN domain and eight C-terminal WD-40 repeats. Involved in cytokinesis of guard mother cells and leaf epidermal cells. The overall growth and development of mutant plants is severely affected, they are smaller than wt, with defects in seedling development, leaf expansion and flower morphology which renders the mutant conditionally sterile.	SCD1	0.211345032331442	0.0122718509566431
AT1G49050	Encodes a member of the aspartyl protease family. Interacts with BAGP1 and BAG6 and appears to be required for cleavage of BAG6 as BAG6 is not cleaved in APCB1 mutant backgrounds.	APCB1	0.651579779494309	2.3395097271724e-07
AT1G49130	Regulated by heat shock.	BBX17	3.7809554856895	4.38519305661209e-112
AT1G49140	NADH dehydrogenase ubiquinone 1 beta subcomplex subunit 10-B-like protein (Complex I subunit NDUFS6);(source:Araport11)	NA	0.721147434409685	8.554934026649e-08
AT1G49170	hypothetical protein;(source:Araport11)	NA	0.916735727947306	0.00323951748457923
AT1G49210	RING/U-box superfamily protein;(source:Araport11)	NA	1.45538924253874	0.00284669786704988
AT1G49230	RING/U-box superfamily protein;(source:Araport11)	AtATL78,ATL78	0.987001718592725	0.0127034951983587
AT1G49240	Member of a subclass of actins composed of ACT2 and ACT8. Its mRNA is strongly expressed in strongly expressed in leaves, roots, stems, flowers, pollen, and siliques. However, protein expression, assayed by a ACT8:GUS fusion reporter, is very low in pollen.	ACT8,FIZ1	0.543145486555234	5.23803688656466e-17
AT1G49300	encodes a small GTPase involved in membrane trafficking. Gene expression is induced by hydrogen peroxide and lines. Lines overexpressing the gene are more tolerant to high salt and hyperosmotic conditions.	ATRAB7,ATRABG3E,RABG3E	0.388578079435654	0.000494376832207637
AT1G49310	transmembrane protein;(source:Araport11)	NA	1.5507243894671	0.0379371305258668
AT1G49350	PsiMP Glycosylase (PUMY) that hydrolyzes PsiMP to uracil and ribose-5-phosphate. Acts together with PUMY in the peroxisome to prevent toxic pseudouridine monophosphate accumulation. Acts together with the a pseudouridine kinase PUKI in the peroxisome to prevent toxic pseudouridine monophosphate accumulation.	NA	0.48716948737688	0.0116284003018953
AT1G49360	F-box family protein;(source:Araport11)	NA	0.443984885220015	0.000260017893039322
AT1G49480	Encodes a nuclear-localized DNA-binding protein that interacts with ITN1 at the PM and nuclei in vivo and may regulate ITN's subcellular localization.	RTV1	0.474142612686151	8.13121014133924e-07
AT1G49530	encodes a mitochondria-targeted geranylgeranyl pyrophosphate synthase	GFPPS3,GGPPS1,GGPS6	0.897340178374663	0.0173076140177497
AT1G49570	Peroxidase superfamily protein;(source:Araport11)	NA	0.427409257901398	0.00258494633352558
AT1G49600	RNA-binding protein 47A;(source:Araport11)	ATRBP47A,RBP47A	1.22599825606127	1.14018549472851e-61
AT1G49720	Identified as a protein that binds to abscisic acid response elements. May mediate transcriptional regulation of ABA responses.	ABF1,AtABF1	0.519725906215683	0.00691632306890899
AT1G49820	encodes 5-methylthioribose kinase, involved in methionine cycle The mRNA is cell-to-cell mobile.	ATMTK,MTK,MTK1	0.329211286708156	0.00353794330430458
AT1G49832	None;(source:Araport11)	NA	3.35828791928804	0.0458029777699671
AT1G49850	RING/U-box superfamily protein;(source:Araport11)	NA	0.318350593769626	0.0148346554337819
AT1G50010	Encodes alpha-2,4 tubulin. TUA2 and TUA4 encode identical proteins. The mRNA is cell-to-cell mobile.	TUA2	0.475486137662003	2.5300515850853e-07
AT1G50110	Encodes a cytosolic branched-chain aminotransferase that acts on Leu, Ile, Val and also on Met. Together with BCAT4 and BCAT3, it is involved in methionine salvage and glucosinolate biosynthesis.	BCAT6	0.522028025176942	0.043711852986189
AT1G50360	member of Myosin-like proteins	ATVIIIA,VIIIA	0.390228102007708	0.00106031458100945
AT1G50410	Encodes a member of the SNF2 family of helicase-like proteins and is involved in RNA-directed DNA methylation. It is functionally redundant with FRG1.	CHR28,FRG2	0.21978928206878	0.0267339855462902
AT1G50480	10-formyltetrahydrofolate synthetase (THFS) mRNA, complete The mRNA is cell-to-cell mobile.	THFS	1.14131419721478	2.25688039207614e-74
AT1G50490	Encodes one of two ubiquitin-conjugating enzymes belonging to the E2-C gene family (the other being UBC19). Transcript is always found in diving cells, but also in other non-dividing cells.	UBC20	0.340651743983076	0.0117058403512311
AT1G50500	encodes a member of VPS53 family protein involved in the retrograde trafficking of vesicles to the late Golgi. Mutants in this gene are more sensitive to heat and osmotic stress.	ATVPS53,HIT1,VPS53	0.53320022208957	5.58127725228928e-08
AT1G50560	member of CYP705A	CYP705A25	0.456274829198702	0.00417575231720532
AT1G50640	encodes a member of the ERF (ethylene response factor) subfamily B-1 of ERF/AP2 transcription factor family (ATERF-3). The protein contains one AP2 domain. There are 15 members in this subfamily including ATERF-3, ATERF-4, ATERF-7, and leafy petiole.	ATERF3,ERF3	0.421587750123875	3.01543698819452e-05
AT1G50940	Encodes the electron transfer flavoprotein ETF alpha, a putative subunit of the mitochondrial electron transfer flavoprotein complex (ETF beta is At5g43430.1) in Arabidopsis. Mutations of the ETF beta gene results in accelerated senescence and early death compared to wild-type during extended darkness.	ETFALPHA	0.555285569454487	0.000269336299526291
AT1G50970	Membrane trafficking VPS53 family protein;(source:Araport11)	NA	0.460463815045625	0.0169250486714697
AT1G51130	&	NA	1.26090834683389	0.000645894526781985
AT1G51170	Encodes an active AGC VIII protein kinase that interacts with the putative transcription factor ATS and regulates planar growth during integument development in the ovule. Mutants exhibit ectopic growth in filaments and petals, as well as aberrant embryogenesis.	AGC2-3,UCN	1.25723498154784	2.019905131263e-17
AT1G51200	A20/AN1-like zinc finger family protein;(source:Araport11)	NA	0.45370424540723	2.46150549266482e-11
AT1G51260	ACYL-COA:1-ACYLGLYCEROL-3-PHOSPHATE ACYLTRANSFERASE, PUTATIVE SIMILAR TO ACYL-COA:1-ACYLGLYCEROL-3-PHOSPHATE ACYLTRANSFERASE GI:4583544 FROM [BRASSICA NAPUS]	LPAT3	1.97298358711334	0.00111965287001377
AT1G51360	Involved in defense against fungal pathogens and located in cytosol.	ATDABB1,DABB1	0.321817663157354	0.0335109613473223
AT1G51420	sucrose-phosphatase 1;(source:Araport11)	ATSPP1,SPP1	0.514272336834174	0.0404588539168698
AT1G51430	cTAGE family protein;(source:Araport11)	NA	0.506672613420387	0.0332835709454168
AT1G51550	Kelch repeat-containing F-box family protein;(source:Araport11)	NA	0.680139468145764	0.000135375472330828
AT1G51645	Natural antisense transcript overlaps with AT1G51640;(source:Araport11)	NA	0.667938231433025	0.000754170814565706
AT1G51650	ATP synthase epsilon chain;(source:Araport11)	NA	0.285641213980936	0.0448241305740674
AT1G51730	Ubiquitin-conjugating enzyme family protein;(source:Araport11)	NA	0.548952954658314	3.33169340523198e-05
AT1G51740	member of SYP8 Gene Family	ATSYP81,ATUFE1,SYP81,UFE1	0.635834903054763	0.000873785666872961
AT1G51760	encodes a member of the six Arabidopsis IAA-amino acid conjugate hydrolase subfamily and conjugates and conjugates IAA-Ala in vitro. Gene is expressed most strongly in roots, stems, and flowers. The mRNA is cell-to-cell mobile.	IAR3,JR3	0.28886279681077	0.0103217202164404
AT1G51830	Leucine-rich repeat protein kinase family protein;(source:Araport11)	SIF1	0.541832945285582	0.00299744287047488
AT1G51870	protein kinase family protein;(source:Araport11)	NA	1.3795370084517	0.00842932748396865
AT1G51940	Encodes a LysM-containing receptor-like kinase. Induction of chitin-responsive genes by chitin treatment is not blocked in the mutant. Based on protein sequence alignment analysis, it has a typical RD signaling domain in its catalytic loop and possesses autophosphorylation activity.It is required for the suppression of defense responses in absence of pathogen infection or upon abscisic acid treat…	AtLYK3,LYK3	0.454531547876729	2.56362485826989e-05
AT1G52000	Mannose-binding lectin superfamily protein;(source:Araport11)	NA	0.53789770783251	0.001323117941979
AT1G52150	Member of the class III HD-ZIP protein family. Contains homeodomain and leucine zipper domain. Critical for vascular development and negatively regulates vascular cell differentiation.	ATHB-15,ATHB15,CNA,ICU4	0.352883800262153	3.30391331839065e-05
AT1G52190	Encodes a low affinity nitrate transporter that is expressed in the plasma membrane and found in the phloem of the major veins of leaves. It is responsible for nitrate redistribution to young leaves.	AtNPF1.2,NPF1.2,NRT1.11	1.97635489782233	5.74481700772323e-64
AT1G52245	dynein light chain LC6, flagellar outer arm-like protein;(source:Araport11)	NA	1.53491728672622	0.0004394417607467
AT1G52290	Encodes a member of the proline-rich extensin-like receptor kinase (PERK) family. This family consists of 15 predicted receptor kinases (PMID: 15653807).	AtPERK15,PERK15	0.937989480970705	0.00974920232816479
AT1G52320	kinesin-like protein;(source:Araport11)	NA	0.344617822182856	0.000312149219449486
AT1G52420	UDP-Glycosyltransferase superfamily protein;(source:Araport11)	NA	0.430573563569716	1.04452224489951e-05
AT1G52580	RHOMBOID-like protein 5;(source:Araport11)	ATRBL5,RBL5	2.37679979538405	0.0043848687752899
AT1G52710	Rubredoxin-like superfamily protein;(source:Araport11)	NA	1.40056966127792	0.000295892628955023
AT1G52720	hypothetical protein;(source:Araport11)	NA	0.274467866413379	0.00907360585193879
AT1G52740	Encodes HTA9, a histone H2A protein. Loss of all H2A.Z (triple mutant with HTA8 and HTA11) results in a reduction in DNA methylation of transposons but not that of genes. Loss of H2A.Z causes misregulation of many genes involved in the response to developmental and environmental cues, and that these genes tend to have high levels of gene-body H2A.Z.	H2A.Z,HTA9	0.824880191931463	3.62758866602429e-24
AT1G52750	alpha/beta-Hydrolases superfamily protein;(source:Araport11)	NA	1.42839901236789	6.24859136038495e-34
AT1G52780	PII, uridylyltransferase (DUF2921);(source:Araport11)	NA	0.271931667793694	0.00296882345257392
AT1G52830	An extragenic dominant suppressor of the hy2 mutant phenotype. Also exhibits aspects of constitutive photomorphogenetic phenotype in the absence of hy2. Mutants have dominant leaf curling phenotype shortened hypocotyls and reduced apical hook. Induced by indole-3-acetic acid.	IAA6,SHY1	5.62952415031202	0.000377576863338905
AT1G52980	Encodes a GTPase that belongs to the subfamily of YlqF/YawG GTPases. Functions in Pre-60S ribosomal subunit maturation. The mRNA is cell-to-cell mobile.	AtNug2,Nug2	0.283392899916207	0.00626530271676441
AT1G53035	transmembrane protein;(source:Araport11)	NA	1.09289005825161	5.89299645838184e-07
AT1G53060	Legume lectin family protein;(source:Araport11)	NA	0.585145113751328	0.0470459415217405
AT1G53080	Legume lectin family protein;(source:Araport11)	NA	3.40568279551283	0.00112846848751301
AT1G53165	Protein kinase superfamily protein;(source:Araport11)	ATMAP4K_ALPHA1	0.49814772134907	7.28091130794156e-05
AT1G53170	encodes a member of the ERF (ethylene response factor) subfamily B-1 of ERF/AP2 transcription factor family (ATERF-8). The protein contains one AP2 domain. There are 15 members in this subfamily including ATERF-3, ATERF-4, ATERF-7, and leafy petiole.	ATERF-8,ATERF8,ERF8	1.13736008330598	5.48884603683842e-14
AT1G53180	hypothetical protein;(source:Araport11)	NA	1.65721454660079	5.10073733721203e-19
AT1G53190	Encodes a RING-type E3 ligase that positively regulates CIN-like TCP activity to promote leaf development by mediating the degradation of the TCP repressor TIE1.	TEAR1	0.673125771656518	4.46458742958845e-16
AT1G53280	Encodes a homolog of animal DJ-1 superfamily protein. In the A. thaliana genome, three genes encoding close homologs of human DJ-1 were identified AT3G14990 (DJ1A), AT1G53280 (DJ1B) and AT4G34020 (DJ1C). Among the three homologs, DJ1C is essential for chloroplast development and viability. It exhibits glyoxalase activity towards glyoxal and methylglyoxal.	AtDJ1B,DJ-1b,DJ1B	0.886505670339915	5.48746379239439e-20
AT1G53320	Member of plant TLP family. TLP7 is tethered to the PM but detaches upon stimulus and translocates to the nucleus. Has DNA binding activity but lacks conservation of the transcription activation domain.	AtTLP7,TLP7	1.01027874633764	3.87680449748172e-32
AT1G53400	Ubiquitin domain-containing protein;(source:Araport11)	NA	0.573533381351394	0.000992679882708306
AT1G53450	epstein-barr nuclear antigen;(source:Araport11)	NA	2.05950474889026	1.94026038020979e-75
AT1G53690	Protein of unknown function that is homologous to At5g41010, which encodes a non-catalytic subunit common to nuclear DNA-dependent RNA polymerases II, IV and V; homologous to budding yeast RPB12.	NA	2.91398725579947	0.000161769387514997
AT1G53700	The WAG1 and its homolog, WAG2 each encodes a protein-serine/threonine kinase that are nearly 70% identical to PsPK3 protein. All three together with CsPK3 belong to PsPK3-type kinases. At the N-terminus, all four possess a serine/threonine-rich domain. They are closely related to Arabidopsis kinases PINOID. wag1/wag2 double mutants exhibit a pronounced wavy root phenotype when grown vertically o…	PK3AT,WAG1	2.74031774892527	5.72786446445166e-45
AT1G53710	Calcineurin-like metallo-phosphoesterase superfamily protein;(source:Araport11)	NA	0.431436556407585	0.000835952705959683
AT1G53770	O-fucosyltransferase family protein;(source:Araport11)	NA	0.417599316970269	0.00569706289888313
AT1G53780	26S proteasome regulatory complex ATPase;(source:Araport11)	NA	0.908096189361698	1.38164551869166e-28
AT1G53830	encodes a pectin methylesterase	ATPME2,PME2	1.19513718796449	1.3154116118653e-12
AT1G53840	encodes a pectin methylesterase	ATPME1,PME1	0.546346579128153	2.57908900781221e-11
AT1G53885	linoleate 9S-lipoxygenase-4 protein, putative (DUF581);(source:Araport11). Senescence associated protein, expression regulated by cytokinin.	NA	1.1957437472602	0.000118333520916102
AT1G54000	GDSL-motif esterase/acyltransferase/lipase. Enzyme group with broad substrate specificity that may catalyze acyltransfer or hydrolase reactions with lipid and non-lipid substrates.	GLL22	0.319394386245498	0.0101180554809103
AT1G54010	GDSL-motif esterase/acyltransferase/lipase. Enzyme group with broad substrate specificity that may catalyze acyltransfer or hydrolase reactions with lipid and non-lipid substrates.	GLL23	1.01966861493119	5.38945890211966e-07
AT1G54080	oligouridylate-binding protein 1A;(source:Araport11)	UBP1A	0.416414183336013	3.78489077320265e-10
AT1G54100	Aldehyde dehydrogenase	ALDH7B4	1.26900504634402	3.34549146909443e-86
AT1G54115	Involved in cation (Na and K) homeostasis.	ATCCX4,CCX4	0.385331423395924	1.05043758756807e-05
AT1G54120	hypothetical protein;(source:Araport11)	NA	0.843359394452157	0.0175942728171751
AT1G54130	This gene appears to be at least partially redundant with RSH2 (At3g14050). Guanosine tetraphosphate synthesized by RSH2/RSH3 (and CRSH At3g17470) to an unknown extent can repress chloroplast gene expression, and also reduce chloroplast size. Involved in the maintenance of the (p)ppGp level to accustom plastidial gene expression to darkness.	AT-RSH3,ATRSH3,RSH3	0.744367081042589	4.81393593129399e-20
AT1G54180	Belongs to five-member BRX gene family. Arabidopsis BRX genes share high levels of similarity among each others, with several conserved domains. The most distinct is BRX domain - highly conserved in all BRX genes among distantly related species. This protein-protein interaction domain is required and sufficient for BRX activity.	ATBRXL3,BRX-LIKE3	0.509923744750086	0.0365128282829994
AT1G54200	DNA mismatch repair Msh6-like protein;(source:Araport11)	BG3	0.639314707410553	0.0175006109416691
AT1G54250	One of two highly similar proteins that can serve as non-catalytic subunits of Nuclear RNA polymerases II and V; homologous to budding yeast RPB8. Probably redundant with At3g59600.	ATRPABC16.5,NRPB8A,NRPE8A	0.70843561421993	0.000132907389624472
AT1G54310	S-adenosyl-L-methionine-dependent methyltransferases superfamily protein;(source:Araport11)	NA	0.959870648522167	1.64406294164304e-11
AT1G54320	LEM3 (ligand-effect modulator 3) family protein / CDC50 family protein;(source:Araport11)	NA	0.344534883132024	3.56341882987368e-05
AT1G54370	Encodes an endosomal Na(+)/H(+) antiporter: AT1G54370 (NHX5), AT1G79610 (NHX6). Double knockout nhx5 nhx6 showed reduced growth, with smaller and fewer cells and increased sensitivity to salinity.	ATNHX5,NHX5	0.673271911863218	2.7196314705911e-12
AT1G54860	Glycoprotein membrane precursor GPI-anchored;(source:Araport11)	NA	3.50328017429146	8.21501256087368e-05
AT1G54920	hypothetical protein;(source:Araport11)	NA	0.747513493302316	2.58023944060688e-21
AT1G55000	peptidoglycan-binding LysM domain-containing protein;(source:Araport11)	NA	0.375846385432728	0.000949350049382801
AT1G55110	indeterminate(ID)-domain 7;(source:Araport11)	AtIDD7,IDD7,REDSTART	0.489871208246959	0.00244467879992157
AT1G55120	Encodes a protein with fructan exohydrolase (FEH) activity acting on levan-type fructans (6-FEH, levanase). The enzyme does not have invertase activity.	AtcwINV3,ATFRUCT5,FRUCT5	1.30808528553831	3.68692670059869e-06
AT1G55310	Encodes a SR spliceosome protein that is localized to nuclear specks, interacts with SR45 and the U1-70K protein of the U1 snRNP, has sequence similar to human SC35 protein. Barta et al (2010) have proposed a nomenclature for Serine/Arginine-Rich Protein Splicing Factors (SR proteins): Plant Cell. 2010, 22:2926.	At-SCL33,ATSCL33,SCL33,SR33	0.262497143174041	0.0101220302584154
AT1G55360	tRNA-splicing ligase (DUF239);(source:Araport11)	NA	0.568065491115264	7.81652632737217e-08
AT1G55510	branched-chain alpha-keto acid decarboxylase E1 beta	BCDH_BETA1	1.09911030825226	2.44565635703287e-18
AT1G55530	RING/U-box superfamily protein;(source:Araport11)	NA	0.411590288339607	7.18804667664871e-06
AT1G55590	RNI-like superfamily protein;(source:Araport11)	NA	0.496742884846898	5.16890790924804e-06
AT1G55760	Expression induced under NaCl, mannitol, ABA and indole-3-acetic acid (IAA) treatment.	NA	0.296925863601947	0.0425130326565677
AT1G55810	One of the homologous genes predicted to encode proteins with UPRT domains (Uracil phosphoribosyltransferase). Five of these genes (At5g40870, At3g27190, At1g55810, At4g26510 and At3g27440) show a high level of identity, and are annotated as also containing a N-terminal uracil kinase (UK) domain. These genes are referred to as UKL1 (UK-like 1), UKL2, UKL3, UKL4 and UKL5, respectively.	UKL3	1.25977994158212	1.34322276850191e-26
AT1G55840	Sec14p-like phosphatidylinositol transfer family protein;(source:Araport11)	NA	0.404924244866485	1.07120770519108e-06
AT1G55880	Pyridoxal-5-phosphate-dependent enzyme family protein;(source:Araport11)	NA	0.468346130887375	0.000807596602653293
AT1G56000	FAD/NAD(P)-binding oxidoreductase family protein;(source:Araport11)	NA	0.674252091948404	4.65967492627577e-08
AT1G56010	Encodes a transcription factor involved auxin-mediated lateral root formation. Acts downstream of TIR1 and is regulated post-transcriptionally by miRNA164 and by SINAT5-dependent ubiquitination.	anac021,ANAC022,NAC1	0.361718688507571	0.000153087713265345
AT1G56090	Tetratricopeptide repeat (TPR)-like superfamily protein;(source:Araport11)	NA	1.12659184932738	4.52280891275769e-06
AT1G56140	Leucine-rich repeat transmembrane protein kinase;(source:Araport11)	NA	0.349301166344555	0.000242155216768124
AT1G56145	Leucine-rich repeat transmembrane protein kinase;(source:Araport11)	NA	0.459121244638625	4.67656600747254e-05
AT1G56150	SAUR-like auxin-responsive protein family;(source:Araport11)	SAUR71	2.06053855774749	0.00151411101197158
AT1G56180	VIR3 encodes a putative chloroplast metalloprotease that is localized to the thylakoid membrane. The vir3-1 mutant came out of a genetic suppressor screen of the Arabidopsis variegation mutant yellow variegated (var2). The suppressor displayed an additional virescent phenotype, i.e. the bases of young leaves were yellow, and leaf color gradually turned to green toward the leaf tips.	VIR3,VIR3	0.340082221757257	0.00734265928769149
AT1G56200	Encodes a chloroplast localized protein that is essential for chloroplast development.	EMB1303	1.08382275979642	4.67507081977314e-22
AT1G56210	Heavy metal transport/detoxification superfamily protein;(source:Araport11)	NA	0.814401549291834	5.48239343921282e-05
AT1G56220	Dormancy/auxin associated family protein;(source:Araport11)	NA	2.20997077034866	6.17448790486747e-143
AT1G56230	enolase (DUF1399);(source:Araport11)	NA	0.369539800817799	0.00757898322337781
AT1G56280	Encodes a gene whose transcript level in root and leaves increases to progressive drought stress. The increase in transcript level is independent from abscisic acid level. Sequence is not similar to any protein of known function. It appears to be a member of plant-specific gene family. It's phosphorylated by AtCPK11 in a Ca(2+)-dependent manner at Thr105 and Ser107 within the AtDi19 bipartite nuc…	ATDI19,DI19	0.489393717438511	3.34050295932329e-09
AT1G56460	HIT zinc finger and PAPA-1-like domain-containing protein;(source:Araport11)	NA	0.682760666417524	0.000153014722488321
AT1G56612	Natural antisense transcript overlaps with AT1G56610;(source:Araport11)	NA	0.641278975547786	3.83138549180772e-05
AT1G56700	Peptidase C15, pyroglutamyl peptidase I-like protein;(source:Araport11)	NA	0.32452300010869	7.32879970578909e-05
AT1G56710	Pectin lyase-like superfamily protein;(source:Araport11)	PGL1	2.2027344340511	0.0266400296047807
AT1G57540	40S ribosomal protein;(source:Araport11)	NA	0.587153853303518	0.00649958784922545
AT1G57620	emp24/gp25L/p24 family/GOLD family protein;(source:Araport11)	CYB	0.531187120380431	0.00388641245436609
AT1G57720	Translation elongation factor EF1B, gamma chain;(source:Araport11)	NA	0.350424433183734	6.08864465011586e-06
AT1G57790	F-box family protein;(source:Araport11)	NA	0.581215133598635	0.00237249404460754
AT1G57990	Member of a family of proteins related to PUP1, a purine transporter. May be involved in the transport of purine and purine derivatives such as cytokinins, across the plasma membrane.	ATPUP18,PUP18	0.887331508151953	6.17810318369647e-11
AT1G58030	Encodes a member of the cationic amino acid transporter (CAT) subfamily of amino acid polyamine choline transporters. Localized to the tonoplast.	AtCAT2,CAT2	1.19353947908711	1.88021750774883e-48
AT1G58100	Encodes TCP8, belongs to the TCP transcription factor family known to bind site II elements in promoter regions. Modulates GA-dependent stamen filament elongation by direct activation of SAUR63 subfamily genes through conserved target sites in their promoters.	AtTCP8,TCP8	0.214439604661472	0.0427107118818951
AT1G58180	beta carbonic anhydrase 6;(source:Araport11)	ATBCA6,BCA6	0.65561982846779	0.000613953309478353
AT1G58235	hypothetical protein;(source:Araport11)	NA	0.766020892050126	5.24251536285425e-11
AT1G58350	Putative serine esterase family protein;(source:Araport11)	ZW18	0.60926531502363	1.45846983176859e-09
AT1G58400	Disease resistance protein (CC-NBS-LRR class) family;(source:Araport11)	NA	1.23569975921514	1.49885262271565e-12
AT1G58410	Disease resistance protein (CC-NBS-LRR class) family;(source:Araport11)	NA	1.03658970248032	5.50038161084732e-05
AT1G59520	Encodes CW7.	CW7	0.478713117906084	0.000232889387167118
AT1G59580	encodes a mitogen-activated kinase involved in innate immunity The mRNA is cell-to-cell mobile.	ATMPK2,MPK2	0.792716495304035	1.46840925565755e-15
AT1G59610	A high molecular weight GTPase whose GTP-binding domain shows a low homology to those of other plant dynamin-like proteins.Contains a pleckstrin homologous domain. DRP2B and DRP1A participate together in clathrin-coated vesicle formation during endocytosis. The mRNA is cell-to-cell mobile.	ADL3,CF1,DL3,DRP2B	0.165263460102908	0.0242364785260679
AT1G59750	Encodes a member of the auxin response factor family. ARFs bind to the cis element 5'-TGTCTC-3' ARFs mediate changes in gene expression in response to auxin. ARF's form heterodimers with IAA/AUX genes. ARF1 enhances mutant phenotypes of ARF2 and may act with ARF2 to control aspects of maturation and senescence.ARF1:LUC and 3xHA:ARF1 proteins have a half-life of ~3-4 hours and their degradation is…	ARF1	0.271829522347615	0.0030486124974003
AT1G59780	NB-ARC domain-containing disease resistance protein;(source:Araport11)	NA	0.876542752773549	0.0147695681614721
AT1G59830	Encodes one of the isoforms of the catalytic subunit of protein phosphatase 2A: AT1G59830/PP2A-1, AT1G10430/PP2A-2, At2g42500/PP2A-3, At3g58500/PP2A-4 [Plant Molecular Biology (1993) 21:475-485 and (1994) 26:523-528; Note that in more recent publications, there is mixed use of gene names for PP2A-3 and PP2A-4 - some refer to At2g42500 as PP2A-3 and some as PP2A-4].	PP2A-1	0.669206061279475	3.47473640975996e-12
AT1G59870	ATP binding cassette transporter. Localized to the plasma membrane in uninfected cells. In infected leaves, the protein concentrated at infection sites. Contributes to nonhost resistance to inappropriate pathogens that enter by direct penetration in a salicylic acid?dependent manner. Required for mlo resistance. Has Cd transporter activity (Cd2+ extrusion pump) and contributes to heavy metal resi…	ABCG36,ATABCG36,ATPDR8,PDR8,PEN3	0.513404896497603	5.31038748340441e-10
AT1G59900	encodes the e1 alpha subunit of the pyruvate dehydrogenase complex (PDC) The mRNA is cell-to-cell mobile.	AT-E1_ALPHA,E1_ALPHA,IAR4L	1.03886393342488	3.05834834261198e-52
AT1G59940	Type A response regulator highly similar to bacterial two-component response regulators. Rapidly induced by cytokinin. Involved in red-light signaling. Acts redundantly with ARR3 in the control of circadian period in a cytokinin-independent manner.	ARR3	0.786373131422211	0.0116888464326207
AT1G59960	NAD(P)-linked oxidoreductase superfamily protein;(source:Araport11)	NA	0.450359289372195	0.0450367745487628
AT1G59980	ARG1-like 2;(source:Araport11)	ARL2,ATDJC39,GPS4	1.39210243950244	1.18262689468684e-09
AT1G60010	PADRE protein down-regulated after infection by S. sclerotiorun.	NA	1.65357272678038	6.90756725289336e-43
AT1G60060	Serine/threonine-protein kinase WNK (With No Lysine)-like protein;(source:Araport11)	NA	2.66581210404529	3.09482030574298e-46
AT1G60140	Encodes an enzyme putatively involved in trehalose biosynthesis. The protein has a trehalose synthase (TPS)-like domain that may or may not be active as well as a trehalose phosphatase (TPP)-like domain.	ATTPS10,TPS10,TPS10	0.6037772370493	3.36705015091829e-19
AT1G60160	Member of the KT/KUP/HAK family of proton-coupled potassium transporters which have potential effect on cellular expansion.	KT12	0.224627830050479	0.037587471655028
AT1G60200	RBM25 is an alternative splicing factor involved in mediation of abiotic stress response and ABA response. Its expression is modulated by a variety of stressors and it in turn appears to affect the ratio of splice variants of stress responsive genes such as HAB1.2/HAB1.1.	RBM25	0.67975148299002	1.61789573260592e-15
AT1G60430	actin-related protein C3;(source:Araport11)	ARPC3	0.451319918198837	0.0039619977121855
AT1G60440	The gene AT1G60440 encodes pantothenate kinase 1. Its molecular function was shown to phosphorylate pantothenate to form 4?-phosphopantothenate.	ATCOAA,ATPANK1,PANK1	0.780113229994716	7.51062252540949e-09
AT1G60450	Predicted to encode a galactinol synthase.	AtGolS7,GolS7	4.02875743698543	3.37516609568738e-07
AT1G60490	Encodes a phosphatidylinositol 3-kinase that is expressed in most plant tissues. Defects in VPS34 affect a number of cellular processes. Loss of function mutations are not transmitted through the male gametophyte due to defects in microgametogenesis therefore it is difficult to assess the effects of loss of VPS34 function in the whole plant. Involved in salt-stress responses.	ATVPS34,PI3K,VPS34	0.278352534027796	0.000967444593112642
AT1G60505	Natural antisense transcript overlaps with AT1G60510;(source:Araport11)	NA	0.558572336670023	2.03712660869029e-06
AT1G60610	SBP (S-ribonuclease binding protein) family protein;(source:Araport11)	NA	0.726837419264	0.000546759036413293
AT1G60630	Leucine-rich repeat protein kinase family protein;(source:Araport11)	NA	0.965532042673042	0.000772690884000474
AT1G60810	One of the three genes encoding subunit A of the trimeric enzyme ATP Citrate lyase	ACLA-2,ACLA2	0.268527819086273	0.0451304938538016
AT1G60870	maternal effect embryo arrest 9;(source:Araport11)	MEE9	0.507128173994221	0.00548500009128061
AT1G60900	Putative U2A65 splicing factor which functions in abscisic acid mediated flowering via regulating the precursor messenger RNA splicing of ABI5 and FLC in shoot apex. Regulates flowering time and displays a redundant role in pollen tube growth together with AtU2AF65a.	ATU2AF65B,U2AF65b	0.427633121165525	0.00013425802968936
AT1G60989	Encodes a member of a family of small, secreted, cysteine rich proteins with sequence similarity to SCR (S locus cysteine-rich protein).	SCRL7	0.339637052040369	0.0411228617954848
AT1G61040	Encodes a yeast Paf1C subunit homolog required for the expression of the MADS box gene FLC and other members of the FLC/MAF MADS-box gene family. Member of PAF-C complex.	VIP5	0.269197466822435	0.0267670615755262
AT1G61065	1,3-beta-glucan synthase component (DUF1218);(source:Araport11)	NA	0.830964515817241	0.00283320800282675
AT1G61160	retrotransposon gag;(source:Araport11)	NA	4.2105520756626	0.0489953183649435
AT1G61170	hypothetical protein;(source:Araport11)	NA	0.80412478939296	0.000463251156654144
AT1G61180	Coiled-coil nucleotide-binding leucine-rich-repeat protein involved in disease resistance.	UNI	0.857137949752329	6.45619897191154e-17
AT1G61250	Encodes a putative secretory carrier membrane protein (SC3). The mRNA is cell-to-cell mobile.	AtSCAMP1,SC3,SCAMP1	0.543509555873575	1.55897626121678e-08
AT1G61255	hypothetical protein;(source:Araport11)	NA	0.843557998953121	0.0222342983761942
AT1G61260	cotton fiber (DUF761);(source:Araport11)	NA	1.36624763226486	3.56912280850193e-07
AT1G61360	S-locus lectin protein kinase family protein;(source:Araport11)	NA	0.590875097282981	0.000192297262135163
AT1G61420	S-locus lectin protein kinase family protein;(source:Araport11)	NA	0.874833776828846	0.00283991780630736
AT1G61460	G-type lectin S-receptor-like Serine/Threonine-kinase;(source:Araport11)	NA	0.900626608427608	0.0452354839893485
AT1G61480	S-locus lectin protein kinase family protein;(source:Araport11)	NA	1.91130623407741	0.0295683391374425
AT1G61560	A member of a large family of seven-transmembrane domain proteins specific to plants, homologs of the barley mildew resistance locus o (MLO) protein. The Arabidopsis genome contains 15 genes encoding MLO proteins, with localization in plasma membrane. Phylogenetic analysis revealed four clades of closely-related AtMLO genes. ATMLO6 belongs to the clade IV, with AtMLO2, AtMLO3 and AtMLO12. The gen…	ATMLO6,MLO6	1.01125701214166	0.000557838218607835
AT1G61590	Protein kinase superfamily protein;(source:Araport11)	NA	1.10047230750784	7.11693546611007e-35
AT1G61620	Encodes a RING-finger E3 ubiquitin ligase that plays a major role in maintaining COP1 homeostasis by targeting COP1 for ubiquitination and degradation in dark-grown seedlings. The mRNA is cell-to-cell mobile.	CSU1	0.4681649034066	4.67472257794917e-05
AT1G61667	serine protease, putative (Protein of unknown function, DUF538);(source:Araport11)	NA	0.763213141842559	0.00104622689640512
AT1G61690	phosphoinositide binding protein;(source:Araport11)	NA	0.389982930833472	0.000434454166447695
AT1G61740	Sulfite exporter TauE/SafE family protein;(source:Araport11)	NA	0.316105138569616	0.000106369812907035
AT1G61750	Receptor-like protein kinase-related family protein;(source:Araport11)	NA	1.37768525791767	2.47150751548156e-07
AT1G61840	Cysteine/Histidine-rich C1 domain family protein;(source:Araport11)	NA	1.87717103940864	2.37476693147723e-12
AT1G61850	Encodes a non-specific lipase that hydrolyzes phospholipids as well as galactolipids, at both sn-1 and sn-2 positions. Involved in basal jasmonic acid biosynthesis by releasing the precursor fatty acid from membrane lipids. Mutant plants were impacted in resistance to fungus B. cinerea.	NA	0.492300221900545	1.06680439514112e-07
AT1G61970	Mitochondrial transcription termination factor family protein;(source:Araport11)	NA	0.978432859325814	2.88144983410879e-10
AT1G62020	Member of the Coat Protein I (COPI) complex is a seven-subunit coatomer complex consisting of the &	NA	0.166314314956076	0.0181599351522604
AT1G62040	Autophagy protein.	ATG8C	0.630208022983714	0.000542594788219526
AT1G62280	Encodes a protein with ten predicted transmembrane helices. The SLAH1 protein has similarity to the SLAC1 protein involved in ion homeostasis in guard cells. Although it is not expressed in guard cells, it can complement a slac1-2 mutant suggesting that it performs a similar function. SLAH1:GFP localizes to the plasma membrane.	SLAH1	2.68323323511721	9.12855458894619e-11
AT1G62290	Saposin-like aspartyl protease family protein;(source:Araport11)	AtPaspA2,PaspA2	0.930030683832145	1.58068058474806e-16
AT1G62310	Encodes a probable H3K9me2 demethylase. Functions in trichome morphogenesis via regulation of GL3.	NA	0.859096679985522	1.81096725208969e-14
AT1G62330	O-fucosyltransferase family protein;(source:Araport11)	NA	0.382311048568043	0.00270916533913285
AT1G62380	Encodes a protein similar to 1-aminocyclopropane-1-carboxylic oxidase (ACC oxidase). Expression of the AtACO2 transcripts is affected by ethylene.	ACO2,ATACO2	0.595693216419237	4.88614190275112e-11
AT1G62422	hypothetical protein;(source:Araport11)	NA	0.833773621709372	1.24858588970838e-07
AT1G62440	encodes a paralog of LRX1 (LEUCINE-RICH REPEAT/EXTENSIN 1) which acts synergistically with LRX1 in root hair cell morphogenesis.	LRX2	2.00080054640868	2.21370590312722e-79
AT1G62480	Vacuolar calcium-binding protein-like protein;(source:Araport11)	NA	1.54569312955429	5.35007246114761e-44
AT1G62610	NAD(P)-binding Rossmann-fold superfamily protein;(source:Araport11)	NA	1.80168773140046	1.73560872809332e-49
AT1G62760	Pectin methylesterase inhibitor that controls PME activity and pectin methylesterification during Botrytis infection.	AtPMEI10	2.27723302848814	3.72947128073498e-28
AT1G62770	PMEI9 pectin methyleseterase inhibitor. Expressed in many plant tissues.	PMEI9	2.33845993854992	1.55060326243635e-44
AT1G62810	Encodes COPPER AMINE OXIDASE1 (CuAO1). Contributes to abscisic acid- and polyamine-induced nitric oxide biosynthesis and abscisic acid signal transduction.	CuAO1	0.94686044467424	7.99336292953598e-21
AT1G63020	Encodes one of two alternative largest subunits of a putative plant-specific RNA polymerase IV (aka RNA polymerase D). Required for posttranscriptional gene silencing.	NRPD1,NRPD1A,POL_IVA,SDE4,SMD2	0.671712992426675	0.000206697181945292
AT1G63110	GPI transamidase subunit PIG-U;(source:Araport11)	NA	0.504519097780387	4.96113754024964e-07
AT1G63120	AtRBL2 has been identified as a rhomboid protein involved in regulated intramembrane proteolysis (RIP). The enzyme has the proteolytic activity and substrate specificity comparable to the Drosophila Rho-1 protein.	ATRBL2,RBL2	0.343893797328359	0.0229810422832255
AT1G63140	O-methyltransferase family protein;(source:Araport11)	NA	2.55690935718081	4.80319449948039e-17
AT1G63180	Encodes a protein with UDP-D-glucose 4-epimerase activity. Involved in pollen development.	UGE3	0.471148655148257	0.00224111627491936
AT1G63270	Encodes a member of a heterogenous group of non-intrinsic ATP-binding cassette (ABC) proteins. Members of this group bear no close resemblance to each other nor to representatives of specific ABC protein subfamilies from other organisms. This grouping is arbitrary and will likely change upon acquisition of further data.	ABCI1,AtCCMA,ATNAP10,NAP10	0.557239779594055	0.0189401521121688
AT1G63290	Aldolase-type TIM barrel family protein;(source:Araport11)	NA	0.396032762412892	0.00608598993396212
AT1G63300	Myosin heavy chain-related protein;(source:Araport11)	NA	0.880526478938033	6.2312670984535e-05
AT1G63380	NAD(P)-binding Rossmann-fold superfamily protein;(source:Araport11)	NA	1.64112517796541	0.00414681162998146
AT1G63400	Pentatricopeptide repeat (PPR) superfamily protein;(source:Araport11)	NA	1.27731327774363	0.001569204520218
AT1G63500	kinase with tetratricopeptide repeat domain-containing protein;(source:Araport11)	BSK7	0.277438202698938	0.00126291555411255
AT1G63690	SIGNAL PEPTIDE PEPTIDASE-LIKE 2;(source:Araport11)	ATSPPL2,SPPL2	0.541301838389954	2.91709999611801e-11
AT1G63740	Disease resistance protein (TIR-NBS-LRR class) family;(source:Araport11)	NA	0.511956323670306	1.42361369773515e-05
AT1G63800	ubiquitin-conjugating enzyme 5;(source:Araport11)	UBC5	1.05503456094238	1.08988379560756e-16
AT1G63860	Disease resistance protein (TIR-NBS-LRR class) family;(source:Araport11)	NA	1.51970422989972	8.56010942499705e-10
AT1G63940	monodehydroascorbate reductase 6;(source:Araport11)	MDAR6	0.526510190925405	4.7516928801264e-10
AT1G63980	D111/G-patch domain-containing protein;(source:Araport11)	NA	0.534757534532734	0.000257890817074913
AT1G64040	Encodes the catalytic subunit of a Type 1 phosphoprotein Ser/Thr phosphatase, expressed in roots, shoots and flowers.	TOPP3	0.532603103413151	3.20984690217631e-11
AT1G64110	Target promoter of the male germline-specific transcription factor DUO1.	DAA1	1.79700418484223	1.05242256001135e-44
AT1G64230	ubiquitin-conjugating enzyme 28;(source:Araport11)	UBC28	0.490758069064399	1.41322481048662e-11
AT1G64460	Phosphatidylinositol 4-kinase involved in root elongation and hypersensitive response.Affects stability of MIEL1 which in turn affects MYB30 turnover.	NA	0.807138209444856	2.03889345801104e-10
AT1G64550	Encodes a member of GCN subfamily. Predicted to be involved in stress-associated protein translation control. The mutant is affected in MAMP ((microbe-associated molecular patterns)-induced stomatal closure, but not other MAMP-induced responses in the leaves. Arabidopsis has five ABCF proteins, which are all closely related by sequence to yeast GCN20. None of these five are individually required …	ABCF3,AtABCF3,AtGCN20,ATGCN3,GCN20,GCN3,SCORD5	0.306546184302063	6.02120214546336e-05
AT1G64620	Plant-specific Dof transcription factor which regulates vascular cell di	DOF1.8	0.530060055565902	0.0185296902671781
AT1G64640	early nodulin-like protein 8;(source:Araport11)	AtENODL8,ENODL8	2.34774765772548	4.56064051758699e-44
AT1G64650	Major facilitator superfamily protein;(source:Araport11)	NA	0.411174608397393	2.11368310730729e-06
AT1G64660	Encodes a functional methionine gamma-lyase, a cytosolic enzyme catalyzes the degradation of methionine into methanethiol, alpha-ketobutyrate and ammonia. The catabolism of excess methionine is important to methionine homeostasis. The mRNA is cell-to-cell mobile.	ATMGL,MGL	2.09824498914164	8.16880884492955e-110
AT1G64710	GroES-like zinc-binding alcohol dehydrogenase family protein;(source:Araport11)	NA	1.25059832399933	2.00591069149862e-14
AT1G65280	DNAJ heat shock N-terminal domain-containing protein;(source:Araport11)	NA	0.519291663826774	0.000251915435709713
AT1G65290	Encodes a member of the mitochondrial acyl carrier protein (ACP) family that forms part of the membrane arm of mitochondrial complex and contributes to the mitochondrial respiratory chain. The mRNA is cell-to-cell mobile. The designations of mtACP-1 and mtACP-2 in Klusch et al. 2021 (DOI:10.1093/plcell/koab092)are flipped with respect to the nomenclature published by Meyer et al. 2007 (DOI:10.100…	mtACP2	0.194243239732912	0.0447879316253922
AT1G65310	Encodes a xyloglucan endotransglucosylase/hydrolase with only only the endotransglucosylase (XET; EC 2.4.1.207) activity towards xyloglucan and non-detectable endohydrolytic (XEH; EC 3.2.1.151) activity. Expressed in the mature or basal regions of both the main and lateral roots, but not in the tip of these roots where cell division occurs.	ATXTH17,XTH17	1.2312061714721	6.89976150432354e-06
AT1G65370	TRAF-like family protein;(source:Araport11)	NA	1.0673830127585	1.03360061948276e-11
AT1G65510	Secreted peptide which functions in plant growth and pathogen defense.	NA	1.08728751692122	3.68405612876346e-05
AT1G65580	Endonuclease/exonuclease/phosphatase family protein;(source:Araport11)	FRA3	0.398653270656667	4.01617247788653e-07
AT1G65720	transmembrane protein;(source:Araport11)	NA	0.296429865304181	0.0110809288730998
AT1G65920	Regulator of chromosome condensation (RCC1) family with FYVE zinc finger domain-containing protein;(source:Araport11)	NA	1.39117332148521	2.86695166564884e-23
AT1G65970	thioredoxin-dependent peroxidase 2	TPX2	0.591793381902462	3.96727514311532e-07
AT1G66140	Encodes a zinc finger protein containing only a single zinc finger.	ZFP4	0.847975115504959	1.44118015002346e-07
AT1G66180	The gene encodes a putative aspartyl protease (ASP). Its expression is induced in response to light and ascorbate. The mRNA is cell-to-cell mobile.	NA	1.59688172157867	3.5526564422814e-36
AT1G66240	homolog of anti-oxidant 1;(source:Araport11)	ATATX1,ATX1	0.382360401063906	0.0416564878638698
AT1G66350	Negative regulator of GA responses, member of GRAS family of transcription factors. Also belongs to the DELLA proteins that restrain the cell proliferation and expansion that drives plant growth. RGL1 may be involved in reducing ROS accumulation in response to stress by up-regulating the transcription of superoxide dismutases. Rapidly degraded in response to GA. Involved in flower and fruit devel…	RGL,RGL1	1.4210410297597	2.7485863333583e-20
AT1G66410	encodes a calmodulin	ACAM-4,CAM4	0.405712438150044	0.03031100807472
AT1G66450	Cysteine/Histidine-rich C1 domain family protein;(source:Araport11)	NA	1.31698520166304	7.29244893058312e-06
AT1G66730	Encodes a novel plant specific DNA ligase that is involved in seed germination and DNA repair.	AtLIG6,LIG6	0.432711093752309	1.58089543691284e-05
AT1G66780	MATE efflux family protein;(source:Araport11)	NA	3.43550259179559	1.67731862138137e-08
AT1G66870	Carbohydrate-binding X8 domain superfamily protein;(source:Araport11)	NA	2.04765003433101	0.00260923097529498
AT1G66890	50S ribosomal-like protein;(source:Araport11)	NA	0.683180298557048	0.00890840299740398
AT1G66920	Protein kinase superfamily protein;(source:Araport11)	NA	1.41918247642253	0.00528798130090621
AT1G66940	kinase-like protein;(source:Araport11)	NA	0.770411334573922	0.000955096567173994
AT1G67050	membrane-associated kinase regulator;(source:Araport11)	NA	0.648914919624679	0.000531710647065638
AT1G67265	ROTUNDIFOLIA like 21;(source:Araport11)	DVL3,RTFL21	6.82915074707094	1.7862961760413e-07
AT1G67270	Zinc-finger domain of monoamine-oxidase A repressor R1 protein;(source:Araport11)	NA	1.20939790468923	0.0435805198087589
AT1G67280	Encodes a Ni+ dependent glyoxylase.	AtGLYI6	0.395829884572014	1.9916122542004e-07
AT1G67300	Major facilitator superfamily protein;(source:Araport11)	NA	0.309774563004965	0.0409400864083536
AT1G67328	Natural antisense transcript overlaps with AT1G67330;(source:Araport11)	NA	1.60078198687601	1.20224277033265e-06
AT1G67330	Arabinogalactan methylesterase,involved in arabinogalactan glucuronic acid methylation.	NA	0.821025605761408	2.0701964791058e-14
AT1G67340	HCP-like superfamily protein with MYND-type zinc finger;(source:Araport11)	NA	0.298140891442226	0.00587354539772504
AT1G67430	Ribosomal protein L22p/L17e family protein;(source:Araport11)	NA	0.195752322171824	0.0403835028455959
AT1G67480	Galactose oxidase/kelch repeat superfamily protein;(source:Araport11)	NA	0.243109627140228	0.00140239119584383
AT1G67500	Encodes the catalytic subunit of DNA polymerase zeta.Mutants are sensitive to UV-B radiation. Gene is involved in damage-tolerance mechanisms through translesion synthesis(TLS).	ATREV3,REV3	0.217646116365051	0.0412545869668468
AT1G67550	Encodes a nickel-containing urea hydrolase involved in nitrogen recycling. It requires three urease accessory proteins for its activation. The mRNA is cell-to-cell mobile.	URE	0.648195141259548	0.000115267012982198
AT1G67580	Protein kinase superfamily protein;(source:Araport11)	CDKG2	0.365710380668374	2.4622470674773e-06
AT1G67590	Remorin family protein;(source:Araport11)	NA	1.47498261559688	2.37836913258153e-10
AT1G67710	Encodes an Arabidopsis response regulator (ARR) protein that acts in concert with other type-B ARRs in the cytokinin signaling pathway. Affects ABA-JA crosstalk.	ARR11	0.583365629767694	0.014500168600084
AT1G67750	Pectate lyase family protein;(source:Araport11)	NA	0.603728135242441	7.65949014393724e-06
AT1G67810	Encodes a protein capable of stimulating the cysteine desulfurase activity of CpNifS (AT1G08490) in vitro. SufE2:GFP localizes to the chloroplasts where it is likely to play a role in iron-sulfur cluster assembly. Transcript levels for this gene are high in the pollen relative to other organs based on RT-PCR analysis. The mRNA is cell-to-cell mobile.	SUFE2	0.955744292413551	1.66877516767824e-12
AT1G67910	hypothetical protein;(source:Araport11)	NA	2.27628350305358	1.9281790236837e-54
AT1G68020	Encodes an enzyme putatively involved in trehalose biosynthesis. The protein has a trehalose synthase (TPS)-like domain and a trehalose phosphatase (TPP)-like domain. It can complement a yeast mutant lacking both of these activities suggesting that this is a bifunctional enzyme.	ATTPS6,TPS6	0.448018967040645	2.55777307236126e-05
AT1G68050	Encodes FKF1, a flavin-binding kelch repeat F box protein, is clock-controlled, regulates transition to flowering. Forms a complex with GI on the CO promoter to regulate CO expression.	ADO3,FKF1	0.824991873761249	0.000343570620479109
AT1G68060	Encodes a microtubule associated protein (MAP70-1). Expressed in all tissues.	ATMAP70-1,MAP70-1	0.341867944589072	0.0036396884398898
AT1G68100	member of IAA-alanine resistance protein 1	IAR1	0.578244558868716	3.26958610313013e-07
AT1G68110	An ENTH (Epsin NH2 terminal homology)/ANTH/VHS superfamily protein with adenylate cyclase activity and a role in clathrin assembly and endocytosis.	ClAP,EAP1,PICALM9b	1.9096560864119	3.4323432348013e-11
AT1G68140	zinc finger/BTB domain protein, putative (DUF1644);(source:Araport11)	NA	0.470346490832278	1.96095604888082e-08
AT1G68190	B-box zinc finger family protein;(source:Araport11)	BBX27	0.641368769564978	9.7704246795016e-11
AT1G68300	Adenine nucleotide alpha hydrolases-like superfamily protein;(source:Araport11)	NA	0.341712656007017	0.00459575896950174
AT1G68330	membrane-associated kinase regulator;(source:Araport11)	NA	0.882063242287631	0.000784285412666033
AT1G68400	leucine-rich repeat transmembrane protein kinase family protein;(source:Araport11)	NA	0.425544025305551	0.00254623840253916
AT1G68500	hypothetical protein;(source:Araport11)	NA	1.16452842790496	0.0201887211844173
AT1G68550	encodes a member of the ERF (ethylene response factor) subfamily B-6 of ERF/AP2 transcription factor family. The protein contains one AP2 domain. There are 12 members in this subfamily including RAP2.11.	CRF10	0.274336129403511	0.00847518350084485
AT1G68560	Encodes a bifunctional alpha-l-arabinofuranosidase/beta-d-xylosidase that belongs to family 3 of glycoside hydrolases.	ATXYL1,AXY3,GH31,TRG1,XYL1	0.869229028473977	1.93807175929574e-43
AT1G68670	HHO2 is a HRS1 homolog. Nitrate-inducible expression. Also induced in roots by low Pi and is likely involved in maintaining phosphate homeostasis. It is target of PHR1.Both HHO2 and HRS1 are involved in Ni cross regulation of Pi signaling. They function as transcriptional repressors of SPX1, SPX2, and SPX4 as part of a cascade to regulate nitrogen and phosphorus balance. Transcriptional repressor…	HHO2,NIGT1.2	0.380726379274177	0.000319176832462428
AT1G68710	ATPase E1-E2 type family protein / haloacid dehalogenase-like hydrolase family protein;(source:Araport11)	NA	0.329608389305319	0.000548577338628397
AT1G68820	Putative C3HC4 zinc-finger ubiquitin E3 ligase, negative regulator in ABA and drought stress response. May act as a positive role in regulating the high temperature by mediating the degradation of unknown target proteins.	PPRT1	0.228062508863559	0.0285596822585847
AT1G68840	Rav2 is part of a complex that has been named `regulator of the (H+)-ATPase of the vacuolar and endosomal membranes' (RAVE) The mRNA is cell-to-cell mobile.	AtRAV2,EDF2,RAP2.8,RAV2,TEM2	0.491821169470532	5.11829783043329e-09
AT1G68872	Unknown gene	NA	0.683066779002047	0.00360641125851093
AT1G68920	basic helix-loop-helix (bHLH) DNA-binding superfamily protein;(source:Araport11)	bHLH49,CIL1	0.25396829264049	0.0386552742938692
AT1G68935	hypothetical protein;(source:Araport11)	NA	2.61896711206442	0.000218625707670043
AT1G69020	Prolyl oligopeptidase family protein;(source:Araport11)	NA	1.14029770218149	4.56607039282527e-06
AT1G69040	ACT-domain containing protein involved in feedback regulation of amino acid metabolism	ACR4	1.94700277898644	2.80978294231457e-119
AT1G69220	Encodes serine/threonine kinase 1 (SIK1), a Hippo homolog. Regulates cell proliferation and cell expansion.	SIK1	0.588382918793417	8.20448425450269e-11
AT1G69252	other_RNA;(source:Araport11)	NA	0.3689965294684	0.000860877544916194
AT1G69410	Encodes eIF5A-2, a putative eukaryotic translation initiation factor. There are three eIF5A coding genes in Arabidopsis: eIF5A-1/At1g13950, eIF5A-2/At1g26630 and eIF5A-3/At1g69410.	ATELF5A-3,ELF5A-3	0.324933281213731	0.00294367103035098
AT1G69450	Early-responsive to dehydration stress protein (ERD4);(source:Araport11)	NA	0.284396729806452	0.00221365507376713
AT1G69490	Encodes a member of the NAC transcription factor gene family. It is expressed in floral primordia and upregulated by AP3 and PI. Its expression is associated with leaf senescence. The mRNA is cell-to-cell mobile.	ANAC029,ATNAP,NAP	1.4078174563075	1.33374846193278e-09
AT1G69510	cAMP-regulated phosphoprotein 19-related protein;(source:Araport11)	NA	0.671988563413116	3.38240226263752e-06
AT1G69526	S-adenosyl-L-methionine-dependent methyltransferases superfamily protein;(source:Araport11)	NA	0.778470224492773	7.95368654539777e-13
AT1G69570	CDF5 is a circadian regulated transcript that is antiphasic with respect to its natural antisense transcript (NAT) FLORE (AT1G69572).CDF5 transcript accumulation delays flowering. CDF5 links circadian oscillation and photoperiodism.	CDF5	1.62589118486695	1.49614954399202e-17
AT1G69572	Circadian regulated lncRNA, natural antisense gene of CDF5 (AT1G69570). Displays antiphasic expression pattern in relation to CDF5 expression (PMID:28758689).	FLORE	1.83013006585325	0.00039294844138962
AT1G69587	Natural antisense transcript overlaps with AT1G69588;(source:Araport11)	NA	0.678882315200657	0.0265994689990138
AT1G69690	AtTCP15 is involved in the regulation of endoreduplication. Modulates GA-dependent stamen filament elongation by direct activation of SAUR63 subfamily genes through conserved target sites in their promoters.	AtTCP15,TCP15	0.865919153553537	1.52356424584731e-08
AT1G69850	Encodes an inducible component of low-affinity nitrate uptake. mRNA found primarily in root hairs and the epidermis of roots. It also acts as an ABA importer at the site of ABA biosynthesis and is important for the regulation of stomatal aperture in inflorescence stems.	AIT1,AtNPF4.6,ATNRT1:2,NPF4.6,NRT1.2,NRT1:2,NTL1	0.473171955726958	3.36253650748126e-12
AT1G69890	Encodes a member of a conserved DUF domain family that is induced by NO. Based on mutant phenotype may be involved in NO stress response.	NA	0.514129232765147	0.00145600745213917
AT1G69910	Protein kinase superfamily protein;(source:Araport11)	NA	0.409074655216964	0.00151238289980633
AT1G70150	zinc ion binding protein;(source:Araport11)	NA	0.616010229641077	0.00686241737340721
AT1G70160	zinc finger MYND domain protein;(source:Araport11)	NA	0.226550979895218	0.00641757342740208
AT1G70180	Sterile alpha motif (SAM) domain-containing protein;(source:Araport11)	NA	0.437358713285745	3.25818746263361e-06
AT1G70210	Encodes a D-type cyclin that physically interacts with CDC2A. Its expression is upregulated early during germination.	ATCYCD11,CYCD11	0.690920876566082	6.49154536429695e-09
AT1G70260	Encodes an endoplasmic reticulum (ER)-localized nodulin MtN21-like transporter family protein that negatively regulates resistance against biotrophic pathogens but not the necrotrophic pathogen, B. cinerea, possibly by regulating ROS production, cell death and PR1 expression.	RTP1,UMAMIT36	2.27744913339934	1.62025203676993e-26
AT1G70290	Encodes an enzyme putatively involved in trehalose biosynthesis. Though the protein has both trehalose-6-phosphate synthase (TPS)-like and trehalose-6-phosphate phosphatase (TPP)-like domains, neither activity has been detected in enzymatic assays nor has the protein been able to complement yeast TPS or TPP mutants.	ATTPS8,ATTPSC,TPS8	0.306923094330137	0.00121897017080868
AT1G70300	potassium transporter	KUP6	0.246529070150467	0.0187488263572617
AT1G70520	Encodes a cysteine-rich receptor-like protein kinase located to the plasma membrane. Involved in regulating microbe-associated molecular pattern-triggered ROS production and stress induced callose deposition at the plasmodesmata in roots. Required for MAMP-triggered responses and resistance to Pseudomonas syringae pv. tomato 118 DC3000 .	ASG6,CRK2	0.431301267829753	0.000212546343653963
AT1G70530	Encodes a cysteine-rich receptor-like protein kinase.	CRK3	0.533890388129609	4.57839371834571e-07
AT1G70560	TAA1 is involved in the shade-induced production of indole-3-pyruvate (IPA), a precursor to IAA, a biologically active auxin. It is also involved in regulating many aspects of plant growth and development from embryogenesis to flower formation and plays a role in ethylene-mediated signaling. This enzyme can catalyze the formation of IPA from L-tryptophan. Though L-Trp is expected to be the prefer…	CKRC1,SAV3,TAA1,TIR2,WEI8	0.916672017395418	5.26450397355804e-10
AT1G70590	F-box family protein;(source:Araport11)	NA	0.414476544142618	0.000655682438989708
AT1G70620	cyclin-like protein;(source:Araport11)	NA	0.923202663621258	1.16662682907214e-27
AT1G70710	endo-1,4-beta-glucanase. Involved in cell elongation.	ATGH9B1,CEL1,GH9B1	2.65135060485515	6.01684545114411e-170
AT1G70750	myosin-binding protein (Protein of unknown function, DUF593);(source:Araport11)	MyoB2	0.549692655034631	0.00666448457616569
AT1G70830	MLP-like protein 28;(source:Araport11)	MLP28	0.553243228464455	7.14943263747583e-07
AT1G70850	MLP-like protein 34;(source:Araport11)	MLP34	0.791585583668912	0.000443960990085769
AT1G70890	MLP-like protein 43;(source:Araport11)	MLP43,MLP43	0.59608427420122	9.32896381364744e-05
AT1G70980	Class II aminoacyl-tRNA and biotin synthetases superfamily protein;(source:Araport11)	SYNC3	0.575054771761164	3.07489072613416e-08
AT1G70990	Short extensin family protein required during the first phase of dark-grown hypocotyl elongation, regulates the moment and extent of the growth acceleration by modulating cell wall extensibility.	NA	1.12852734278053	5.68734481034187e-05
AT1G71030	Encodes a putative myb family transcription factor. In contrast to most other myb-like proteins its myb domain consists of a single repeat. A proline-rich region potentially involved in transactivation is found in the C-terminal part of the protein. Its transcript accumulates mainly in leaves.	ATMYBL2,MYBL2	0.949060908657934	5.62235584030682e-07
AT1G71080	RNA polymerase II transcription elongation factor;(source:Araport11)	NA	0.91027515626451	2.50651755731428e-14
AT1G71110	transmembrane protein;(source:Araport11)	NA	0.363109680450427	0.00108100269896973
AT1G71260	Encodes WHY2, a homolog of the potato p24 protein. It shares the conserved KGKAAL domain, a putative DNA-binding domain, with potato p24 and is localized to mitochondria and not the nucleus. WHY2 is a member of the Whirly family proteins present mainly in the plant kingdom performing various activities related to DNA metabolism. Crystal structure of Solanum tuberosum WHY2, a close homolog of Arab…	ATWHY2,WHY2	0.266442807644239	0.0232285041294198
AT1G71380	cellulase 3;(source:Araport11)	ATCEL3,ATGH9B3,CEL3	0.932776711495377	0.00149585964186869
AT1G71410	One of two paralogs in Arabidopsis.SCYL2B is a membrane localized protein that interacts with components of clathrin-mediated vesicle trafficking pathways. Loss of both SCYL2B and .SCYL2A results in severe growth defects.	SCYL2B	0.953645725385197	6.58308647410575e-38
AT1G71695	Peroxidase superfamily protein;(source:Araport11)	NA	0.274329366994164	0.0134843338447874
AT1G71730	hypothetical protein;(source:Araport11)	NA	0.743472731322468	7.0409557911292e-13
AT1G71780	WD repeat protein;(source:Araport11)	NA	0.26652350876632	0.032771800881068
AT1G71790	Encodes a heterodimeric actin binding protein composed of an alpha and a beta sumunit. Stabilizes actin filament cytoskeleton by capping.	AtCPB,CPB	0.850286065464613	2.49637798686762e-10
AT1G71865	PyrD;(source:Araport11)	NA	0.781720831596312	0.0119575591689362
AT1G71870	Metabolite transporter involved in the anthocyanin response to anthocyanin induction conditions. Affects ABA signaling and localization.	bige1a	0.556919250764127	0.0186177695739269
AT1G71880	Sucrose transporter gene induced in response to nematodes; member of Sucrose-proton symporter family. The mRNA is cell-to-cell mobile.	ATSUC1,SUC1	0.607015925490896	3.69352478100856e-10
AT1G71970	hypothetical protein;(source:Araport11)	NA	1.61955263167056	2.70336895260105e-49
AT1G71980	RMR2 is a secretory pathway protein localized to the trans-golgi network. It belongs to a family of vacuolar sorting receptors. If forms heterodimers with RMR1.	RMR2	0.622387680089667	2.82472602597338e-17
AT1G71990	This gene encodes a Lewis-type alpha 1,4-fucosyltransferase	ATFT4,ATFUT13,FT4-M,FUCTC,FUT13	1.50661854024391	1.35202283560845e-14
AT1G72060	serine-type endopeptidase inhibitor;(source:Araport11)	NA	0.912976637723256	3.92068674000441e-05
AT1G72150	novel cell-plate-associated protein that is related in sequence to proteins involved in membrane trafficking in other eukaryotes The mRNA is cell-to-cell mobile.	PATL1	0.790108439198371	4.41466764270008e-19
AT1G72190	D-isomer specific 2-hydroxyacid dehydrogenase family protein;(source:Araport11)	NA	0.589255331431566	0.000518665111780156
AT1G72200	RING/U-box superfamily protein;(source:Araport11)	NA	1.14183365350587	3.39269567474048e-29
AT1G72210	basic helix-loop-helix (bHLH) DNA-binding superfamily protein;(source:Araport11)	bHLH096,bHLH96	1.13547621806763	0.0372579262727525
AT1G72370	acidic protein associated to 40S ribosomal subunit of ribosomes. Involved in polysome formation during active protein synthesis. Expressed in actively growing tissue.	AP40,P40,RP40,RPSAA	0.235001873521976	0.00753443885570424
AT1G72410	COP1-interacting protein-like protein;(source:Araport11)	NA	1.11526938441068	2.62104525655078e-33
AT1G72470	A member of EXO70 gene family, putative exocyst subunits, conserved in land plants. Arabidopsis thaliana contains 23 putative EXO70 genes, which can be classified into eight clusters on the phylogenetic tree.	ATEXO70D1,EXO70D1	0.521491056299591	0.000233622691261214
AT1G72520	PLAT/LH2 domain-containing lipoxygenase family protein;(source:Araport11)	ATLOX4,LOX4	0.41996142498144	0.00953078099207137
AT1G72600	hydroxyproline-rich glycoprotein family protein;(source:Araport11)	NA	1.09484472889159	0.000145219848821956
AT1G72650	Arabidopsis thaliana myb family transcription factor (At1g72650)	TRFL6	0.383958088121859	0.000711004060656185
AT1G72710	Encodes a member of the casein kinase 1 protein family that is localized to the cytoplasm and nucleus. The mRNA is cell-to-cell mobile.	CKL2	0.358266978604931	2.21535538899494e-07
AT1G72790	hydroxyproline-rich glycoprotein family protein;(source:Araport11)	NA	0.513001329797406	7.76020410014317e-05
AT1G72820	Mitochondrial substrate carrier family protein;(source:Araport11)	NA	1.02872775698995	4.04729843173328e-21
AT1G72830	Encodes a subunit of CCAAT-binding complex, binds to CCAAT box motif present in some plant promoter sequences. One of three members of this class (HAP2A, HAP2B, HAP2C), it is expressed in vegetative and reproductive tissues. Expression is upregulated in the shoot of cax1/cax3 mutant.	ATHAP2C,HAP2C,NF-YA3	0.428278887413686	0.00255883346399362
AT1G72840	NBS TIR LRR protein. It is induced in response to bacterial pathogens and overexpression results in cell death in leaves.	NA	0.30661369145613	0.00665025678659698
AT1G72855	Natural antisense transcript overlaps with AT1G72860;(source:Araport11)	NA	0.638089359161384	3.63278266746469e-05
AT1G72990	beta-galactosidase 17;(source:Araport11)	BGAL17	0.312294796560953	0.0250264582555769
AT1G73030	Encodes an ESCRT-related protein: CHMP1A/AT1G73030; CHMP1B/AT1G17730. CHMP1A and B mediate multivesicular body sorting of auxin carriers and are required for plant development. ESCRT: Endosomal Sorting Complexes Required For Transport machinery; CHMP: Charged Multivesicular Body Protein/Chromatin Modifying Protein.	CHMP1A,VPS46.2	0.436696982397517	1.95036557025066e-07
AT1G73090	WD repeat protein;(source:Araport11)	NA	0.345407711415597	0.0176466863931377
AT1G73120	F-box/RNI superfamily protein;(source:Araport11)	NA	2.25125914241036	6.09920267708877e-52
AT1G73180	Eukaryotic translation initiation factor eIF2A family protein;(source:Araport11)	NA	0.314875769468092	0.00626128264345892
AT1G73250	encodes a bifunctional 3, 5-epimerase-4-reductase in L-fucose synthesis and converts GDP-D-mannose to GDP-L-fucose in vitro along with MUR1 (GDP-D-mannose 4,6-dehydratase). It is expressed in all tissues examined, but most abundantly in roots and flowers.	ATFX,GER1	0.52122117121121	6.67333128162037e-06
AT1G73260	Encodes a trypsin inhibitor involved in modulating programmed cell death in plant-pathogen interactions.	ATKTI1,AtKTI4,KTI1	0.649309125830474	1.15781507555237e-09
AT1G73300	serine carboxypeptidase-like 2;(source:Araport11)	scpl2	0.857898227532881	1.3970919606751e-15
AT1G73310	serine carboxypeptidase-like 4;(source:Araport11)	scpl4	0.448842670222057	0.00233813363878175
AT1G73330	encodes a plant-specific protease inhibitor-like protein whose transcript level in root disappears in response to progressive drought stress. The decrease in transcript level is independent from abscisic acid level.	ATDR4,DR4	0.728527029426907	0.0240338794007333
AT1G73380	hypothetical protein;(source:Araport11)	NA	1.23777894583094	1.0831489528267e-21
AT1G73590	Encodes an auxin efflux carrier involved in shoot and root development. It is involved in the maintenance of embryonic auxin gradients. Loss of function severely affects organ initiation, pin1 mutants are characterised by an inflorescence meristem that does not initiate any flowers, resulting in the formation of a naked inflorescence stem. PIN1 is involved in the determination of leaf shape by ac…	ATPIN1,PIN1	0.25313514666338	0.0387049183850499
AT1G73600	Encodes a S-adenosyl-L-methionine-dependent phosphoethanolamine N-methyltransferase whose expression is responsive to both phosphate (Pi) and phosphite (Phi) in roots. It catalyzes the three sequential P-base methylation of phosphoethanolamine to phosphocholine. Homologous biochemical function to NMT1 (At3g18000). Double mutants of NMT1 and NMT3 are defective in leaf, root, flower, seed, and poll…	AtPMT3,NMT,NMT3	1.643259652573	1.86291358551345e-11
AT1G73830	Encodes the brassinosteroid signaling component BEE3 (BR-ENHANCED EXPRESSION 3). Positively modulates the shade avoidance syndrome in Arabidopsis seedlings.	BEE3	0.860686282588081	0.00103601046013058
AT1G73885	AT-rich interactive domain protein;(source:Araport11)	NA	0.305541172968159	0.00623942462612121
AT1G74050	Ribosomal protein L6 family protein;(source:Araport11)	NA	0.583232765674567	8.94008648130778e-10
AT1G74060	Ribosomal protein L6 family protein;(source:Araport11)	NA	0.401196186139743	3.7351186458152e-07
AT1G74180	receptor like protein 14;(source:Araport11)	AtRLP14,RLP14	0.549929505264071	0.000679691909928045
AT1G74270	Ribosomal protein L35Ae family protein;(source:Araport11)	NA	0.431596181932423	0.00100611313200871
AT1G74320	encodes a choline kinase, whose expression is induced by high salt and mannitol.	CEK2	0.461507711373254	0.0138385553922659
AT1G74420	Predicted fucosyltransferase, based on similarity to FUT1, but not functionally redundantwith FUT1.	ATFUT3,FUT3	1.97962289328559	2.02953773687345e-05
AT1G74470	Encodes for a multifunctional protein with geranylgeranyl reductase activity shown to catalyze the reduction of prenylated geranylgeranyl-chlorophyll a to phytyl-chlorophyll a (chlorophyll a) and free geranylgeranyl pyrophosphate to phytyl pyrophosphate. The mRNA is cell-to-cell mobile.	NA	0.377640385530637	5.73848155776498e-06
AT1G74490	Protein kinase superfamily protein;(source:Araport11)	NA	1.57736469349976	1.51761891731997e-08
AT1G74520	Part of the AtHVA22a family. Protein expression is ABA- and stress-inducible.	ATHVA22A,HVA22A	0.614652360425508	2.71682249107362e-06
AT1G74680	Exostosin family protein;(source:Araport11)	NA	0.341074222408771	0.0432442799539352
AT1G74840	Homeodomain-like superfamily protein;(source:Araport11)	NA	0.779618050392983	1.47388554068408e-15
AT1G74880	Encodes subunit NDH-O of NAD(P)H:plastoquinone dehydrogenase complex (Ndh complex) present in the thylakoid membrane of chloroplasts. This subunit is thought to be required for Ndh complex assembly.	NDH-O,NdhO	0.592960623533535	3.72168922042746e-09
AT1G74910	KONJAC1 is imilar to sugar pyrophosphorylases but has an insertion of 2 AA in the pyrophosphorylase consensus motif that is highly conserved in GMPPs. It lacks GDP-mannose pyrophosphorylase activity but can simulate the GDP-mannose pyrophosphorylase activity of VTC1.	KJC1	0.353345469845131	7.46973577961786e-05
AT1G74920	ALDH10A8 encodes a protein that has not been functionally characterized, but it is similar to an Arabidopsis protein that has betaine aldehyde dehydrogenase and aminoaldehyde dehydrogenase activity. ALDH10A8 localizes to leucoplasts. aldh10a8 mutant plants are more susceptible to NaCl and dehydration stress.	ALDH10A8	1.19458832649632	6.5434514616559e-60
AT1G74940	cyclin-dependent kinase, putative (DUF581);(source:Araport11)	NA	0.524204742282773	0.000532982767744957
AT1G75080	Encodes a positive regulator of the brassinosteroid (BR) signalling pathway that mediates both downstream BR responses and negative feedback regulation of BR biosynthesis. There is evidence for phosphorylation-dependent nucleocytoplasmic shuttling of BZR1. GSK3-like kinases (including BIN2), 14-3-3 proteins, and the phosphatase BSU1 seem to participate in this process. Phosphorylation also appear…	BZR1	0.533770709502071	3.86760447496398e-07
AT1G75120	Encodes an arabinosyltransferase that modifies extensin proteins in root hair cells.	RRA1	0.861107457721715	0.000195178493129688
AT1G75125	plastid transcriptionally active protein;(source:Araport11)	NA	0.642123559878634	0.0314574258448211
AT1G75130	member of CYP721A	CYP721A1	0.444768796718615	0.00103282057184098
AT1G75140	membrane protein;(source:Araport11)	NA	0.478835935438388	0.000457342296525667
AT1G75180	Erythronate-4-phosphate dehydrogenase family protein;(source:Araport11)	NA	1.1492330472118	1.31073725981246e-35
AT1G75220	Encodes a vacuolar glucose exporter that is induced in response to factors that activate vacuolar glucose pools like darkness, heat stress and wounding and repressed during conditions that trigger glucose accumulation in the vacuole like cold stress and external sugar supply.	AtERDL6,ERDL6	0.225950961280586	0.0130685440723099
AT1G75240	Encodes a zinc finger-homeodomain transcription factor ZHD5. Nuclear import and DNA binding of the ZHD5 transcription factor is modulated by a competitive peptide inhibitor MIF1 (AT1G74660).	AtHB33,HB33,ZHD5	1.75551665610148	4.195284614143e-47
AT1G75295	Natural antisense transcript overlaps with AT1G75290 and AT1G75300;(source:Araport11)	NA	1.13898762006101	1.75495848509071e-15
AT1G75330	ornithine carbamoyltransferase;(source:Araport11)	OTC	0.318779794700451	0.00116101331799406
AT1G75390	basic leucine-zipper 44;(source:Araport11)	AtbZIP44,bZIP44	1.13744696739211	1.15624647726119e-10
AT1G75450	This gene used to be called AtCKX6. It encodes a protein whose sequence is similar to cytokinin oxidase/dehydrogenase, which catalyzes the degradation of cytokinins.	ATCKX5,ATCKX6,CKX5	2.18006827294612	8.84129629084006e-97
AT1G75500	An Arabidopsis thaliana homolog of Medicago truncatula NODULIN21 (MtN21). The gene encodes a plant-specific, predicted integral membrane protein and is a member of the Plant-Drug/Metabolite Exporter (P-DME) family (Transporter Classification number: TC 2.A.7.3) and the nodulin MtN21-like transporter family.	UMAMIT5,WAT1	0.881760254777616	1.55942321561573e-15
AT1G75540	Encodes a B-box zinc finger transcription factor BBX21 (also named STH2/salt tolerance homolog2 and LHUS/long hypocotyl under shade). Interacts with COP1 to control de-etiolation. Also genetically interacts with COP1 to regulate shade avoidance. The mRNA is cell-to-cell mobile.	AtBBX21,BBX21,LHUS,STH2	1.59376632191939	2.10335184765285e-79
AT1G75590	SAUR-like auxin-responsive protein family;(source:Araport11)	SAUR52	1.35485421965274	9.90350692704053e-06
AT1G75620	Galactose oxydase; may function in tissues that require mechanical reinforcements in the absence of lignification.	NA	0.4728554590849	0.0197521794150002
AT1G75630	vacuolar H+-pumping ATPase 16 kD proteolipid (ava-p) mRNA, The mRNA is cell-to-cell mobile.	AVA-P4	0.506935653890904	8.56010942499705e-10
AT1G75640	Encodes a Leucine-Rich Repeat Receptor-Like Kinase MUSTACHES (MUS). Regulates stomatal bilateral symmetry. Mutants have abnormally shaped guard cells, absent or skewed stomatal pores.	MUS	0.311610383901638	0.0417977376091794
AT1G75710	C2H2-like zinc finger protein;(source:Araport11)	NA	0.432535010921051	0.00031359989077805
AT1G75750	GA-responsive GAST1 protein homolog regulated by BR and GA antagonistically. Possibly involved in cell elongation based on expression data The mRNA is cell-to-cell mobile.	GASA1	0.48588111527978	8.56721652473974e-05
AT1G75780	beta tubulin gene downregulated by phytochrome A (phyA)-mediated far-red light high-irradiance and the phytochrome B (phyB)-mediated red light high-irradiance responses	TUB1	1.71674610387824	1.43758258811904e-39
AT1G75800	Pathogenesis-related thaumatin superfamily protein;(source:Araport11)	NA	0.771842916770161	1.49919382876732e-23
AT1G75820	Putative receptor kinase with an extracellular leucine-rich domain. Controls shoot and floral meristem size, and contributes to establish and maintain floral meristem identity. Negatively regulated by KAPP (kinase-associated protein phosphatase). CLV3 peptide binds directly CLV1 ectodomain.	ATCLV1,CLV1,FAS3,FLO5	1.2980176363884	6.51602860540827e-52
AT1G75850	VPS35 homolog B;(source:Araport11)	LAZ4,VPS35B	0.4085206463344	1.31396278447197e-05
AT1G75900	GDSL-motif esterase/acyltransferase/lipase. Enzyme group with broad substrate specificity that may catalyze acyltransfer or hydrolase reactions with lipid and non-lipid substrates.	NA	0.793733980101536	3.15869254952528e-06
AT1G75960	AMP-dependent synthetase and ligase family protein;(source:Araport11)	NA	2.04784368230972	0.00946286352550341
AT1G75990	PAM domain (PCI/PINT associated module) protein;(source:Araport11)	NA	0.268434305682197	0.0209100856331514
AT1G76010	Alba DNA/RNA-binding protein;(source:Araport11)	NA	0.307105084685538	1.90575908552001e-05
AT1G76020	Thioredoxin superfamily protein;(source:Araport11)	NA	0.620512715113664	0.00405307038534909
AT1G76030	One of three genes encoding the vacuolar ATP synthase subunit B1. This subunit was shown to interact with the gene product of hexokinase1 (ATHXK1). This interaction, however, is solely restricted to the nucleus. The protein binds to and co-localizes with F-actin, bundles F-actin to form higher-order structure, and stabilizes actin filaments in vitro. The mRNA is cell-to-cell mobile.	AtVAB1,VAB1	0.438364765302375	3.9041129881481e-09
AT1G76090	Encodes S-adenosyl-methionine-sterol-C-methyltransferase, an enzyme in the sterol biosynthetic pathway.	SMT3	0.801691825317087	6.83291337005299e-15
AT1G76150	Encodes a monofunctional enoyl-CoA hydratase 2, involved in the degradation of even cis-unsaturated fatty acids, gene expression is enhanced during the first 2 days of germination, as well as in senescent leaves.	ATECH2,ECH2	0.720201264292968	9.93266701475401e-13
AT1G76185	NADH-ubiquinone oxidoreductase chain;(source:Araport11)	NA	0.746765496521499	0.0177249425890987
AT1G76200	NADH dehydrogenase ubiquinone 1 beta subcomplex subunit;(source:Araport11)	NA	0.398929063932004	0.00149813100256345
AT1G76240	DUF241 domain protein (DUF241);(source:Araport11)	NA	3.06336513787396	2.64721161594423e-67
AT1G76320	FAR1-related sequence 4;(source:Araport11)	CPD25,FRS4	0.343148994371365	0.00445493428442734
AT1G76400	Ribophorin I;(source:Araport11)	OST1b	0.35154402085144	0.000437498195984848
AT1G76410	RING/U-box superfamily protein;(source:Araport11)	ATL8	1.23602128637912	1.3413463534108e-12
AT1G76460	RNA-binding (RRM/RBD/RNP motifs) family protein;(source:Araport11)	NA	0.829328868763656	1.04899901959663e-17
AT1G76490	Encodes a 3-hydroxy-3-methylglutaryl coenzyme A reductase, which is involved in melavonate biosynthesis and performs the first committed step in isoprenoid biosynthesis. Expression is activated in dark in leaf tissue but not controlled by light in the root (confine The mRNA is cell-to-cell mobile.	AtHMGR1,HMG1,HMGR1,MAD3	0.789986944123852	5.58410830147625e-27
AT1G76500	Encodes an AT hook domain containing protein. Identified in a screen of activation tagged lines that suppress the long-hypocotyl phenotype of a weak phyB allele. Affects cell elongation in the hypocotyl and leaves.Acts redundantly with ESC to modulate hypocotyl growth inhibition in response to light	AHL29,SOB3	1.00346173482544	3.07959991586141e-13
AT1G76510	ARID/BRIGHT DNA-binding domain-containing protein;(source:Araport11)	ARID4	0.339449319488106	0.0171173677550446
AT1G76590	PLATZ transcription factor family protein;(source:Araport11)	NA	0.987731039062024	2.16975335504873e-09
AT1G76660	hydroxyproline-rich glycoprotein family protein;(source:Araport11)	NA	0.34206019769474	0.00191828986810544
AT1G76710	SET domain group 26;(source:Araport11)	ASHH1,SDG26	0.486960995232024	0.0421522339392824
AT1G76820	eukaryotic translation initiation factor 2 (eIF-2) family protein;(source:Araport11)	NA	0.756172947294278	0.0262156734957676
AT1G76860	Small nuclear ribonucleoprotein family protein;(source:Araport11)	LSM3B	0.824160514306646	0.000175011682764908
AT1G76920	F-box family protein;(source:Araport11)	NA	0.306171422920709	0.000236729136141104
AT1G77080	MADS domain protein - flowering regulator that is closely related to FLC. Deletion of this locus in Nd ecotype is correlated with earlier flowering in short days suggesting function as a negative regulator of flowering.	AGL27,FLM,MAF1	0.553237425857826	4.59574691578688e-05
AT1G77120	Catalyzes the reduction of acetaldehyde using NADH as reductant. Requires zinc for activity. Dimer. Anaerobic response polypeptide (ANP). Fermentation. The protein undergoes thiolation following treatment with the oxidant tert-butylhydroperoxide. The mRNA is cell-to-cell mobile.	ADH,ADH1,ATADH,ATADH1	0.477242072551418	0.00684733794775858
AT1G77145	transmembrane protein, putative (DUF506);(source:Araport11)	NA	1.31787976129595	0.0161828026262212
AT1G77180	Encodes a putative transcriptional factor. Shows transcriptional activator activity in yeast. Involved in response to abscisic acid, salt and osmotic stress. SKIP lengthens period of the circadian clock by impairing the alternative splicing of PRR7 and PRR9. SKIP regulates the splicing of SEF pre-mRNA and suppresses flowering by activation of FLC.	SKIP	0.836393469109981	2.80797132836331e-25
AT1G77200	encodes a member of the DREB subfamily A-4 of ERF/AP2 transcription factor family. The protein contains one AP2 domain. There are 17 members in this subfamily including TINY.	NA	1.89752943027489	2.25706433318693e-10
AT1G77210	AtSTP14 belongs to the family of sugar transport proteins (AtSTPs)in volved in monosaccharide transport. Heterologous expression in yeast revealed that AtSTP14 is the transporter specifc for galactose and does not transport other monosaccharides such as glucose or fructose.	AtSTP14,STP14	1.77111932694053	4.36245580016529e-22
AT1G77230	Tetratricopeptide repeat (TPR)-like superfamily protein;(source:Araport11)	NA	0.502318856613107	1.92671493705922e-05
AT1G77330	similar to 1-aminocyclopropane-1-carboxylate oxidase GI:3386565 from (Sorghum bicolor)	ACO5	1.25697713692314	1.2744172788001e-22
AT1G77370	Glutaredoxin family protein;(source:Araport11)	NA	0.286981838282358	0.0395882745771211
AT1G77380	Amino acid permease which transports basic amino acids.	AAP3,ATAAP3	1.63677474829451	9.23045831469163e-34
AT1G77400	extensin-like protein;(source:Araport11)	NA	0.676319537319795	0.046913964394721
AT1G77420	alpha/beta-Hydrolases superfamily protein;(source:Araport11)	MAGL5	0.296982349512553	0.031964920128777
AT1G77480	Eukaryotic aspartyl protease family protein;(source:Araport11)	NA	0.35087366889718	0.00142848577916834
AT1G77500	DUF630 family protein, putative (DUF630 and DUF632);(source:Araport11)	NA	0.535776075489577	3.45649727609648e-07
AT1G77530	O-methyltransferase family protein;(source:Araport11)	NA	0.876617489268281	0.00875990179846744
AT1G77540	Encodes a H3/H4 histone acetyltransferase. Belongs to the GNAT family, whose many members are involved in histone acetylation and chromatin remodeling, and are important for the regulation of cell growth and development.	NA	0.472930139860213	0.0182204086407518
AT1G77610	EamA-like transporter family protein;(source:Araport11)	NA	0.294180725339876	0.0010296040256061
AT1G77690	Encodes an auxin influx carrier LAX3 (Like Aux1) that promotes lateral root emergence. Auxin-induced expression of LAX3 in turn induces a selection of cell-wall-remodelling enzymes, which are likely to promote cell separation in advance of developing lateral root primordia.	LAX3	1.12824114456883	3.38089848562402e-27
AT1G77710	ubiquitin-fold modifier;(source:Araport11)	AtCCP2,CCP2	0.569893536575737	0.000269601583445751
AT1G77810	Galactosyltransferase family protein;(source:Araport11)	NA	0.984102708936205	6.16447946030034e-08
AT1G77850	Encodes a transcriptional regulator that directly binds to the promoter of MYB108 and plays a crucial role in anther dehiscence, pollen wall pattern formation, tapetum development, and auxin signal transduction in anthers. It is post-transcriptionally regulated by miR160 and regulates early auxin response genes.	ARF17	0.523040947742132	3.07274029170764e-07
AT1G77860	Mutant has Altered morphology of pollen exine wall; Seven-Path Transmembrane Protein	KOM	1.58572021544857	0.0282442554898268
AT1G77870	membrane-anchored ubiquitin-fold protein 5 precursor;(source:Araport11)	MUB5	3.78614429935073	6.83127425473278e-05
AT1G77920	bZIP transcription factor family protein;(source:Araport11)	TGA7	0.447895707754883	0.00530057837631328
AT1G77990	Encodes a low-affinity sulfate transporter.	AST56,SULTR22	0.863483543987202	3.44241324476886e-06
AT1G78010	tRNA modification GTPase;(source:Araport11)	TrmE	0.675526905690908	1.92212584473677e-08
AT1G78080	Encodes a member of the DREB subfamily A-6 of ERF/AP2 transcription factor family (RAP2.4). The protein contains one AP2 domain. Role in mediating light and ethylene signaling. The mRNA is cell-to-cell mobile.	AtWIND1,RAP2.4,WIND1	0.729588958398996	8.68478984848399e-22
AT1G78110	nucleolar GTP-binding protein;(source:Araport11)	NA	0.584373591509634	0.00267762591025693
AT1G78130	Major facilitator superfamily protein;(source:Araport11)	UNE2	1.49342501083487	3.65046884710238e-17
AT1G78150	N-lysine methyltransferase;(source:Araport11)	NA	0.717476381445867	2.78978682783358e-11
AT1G78240	Encodes TSD2 (TUMOROUS SHOOT DEVELOPMENT2), a putative methyltransferase with an essential role in cell adhesion, anthocyanin accumulation, and coordinated plant development.	OSU1,QUA2,TSD2	0.628762871977507	3.72420185614891e-18
AT1G78260	RNA-binding (RRM/RBD/RNP motifs) family protein;(source:Araport11)	NA	0.675144539295464	2.94082659465669e-05
AT1G78265	Natural antisense transcript overlaps with AT1G78270;(source:Araport11)	NA	1.22482098671339	3.13284853697187e-19
AT1G78270	UDP-glucosyl transferase 85A4;(source:Araport11)	AtUGT85A4,UGT85A4	2.06739790482244	1.2161585554878e-19
AT1G78280	transferases, transferring glycosyl groups;(source:Araport11)	NA	0.236840882477277	0.0155673900207693
AT1G78300	G-box binding factor GF14 omega encoding a 14-3-3 protein The mRNA is cell-to-cell mobile.	14-3-3OMEGA,GF14_OMEGA,GRF2	0.1621567936987	0.0376347516172903
AT1G78560	Chloroplast inner membrane, pantothenate transporter.	BASS1	0.551221854196506	3.79497844632339e-08
AT1G78660	The Arabidopsis protein AtGGH1 is a gamma-glutamyl hydrolase cleaving pentaglutamates to yield di- and triglutamates. The enzyme is involved in the tetrahydrofolate metabolism and located to the vacuole.	ATGGH1,GGH1	0.49348335768909	9.68711624475654e-11
AT1G78700	BES1/BZR1 homolog 4;(source:Araport11)	BEH4	0.649591236824014	5.42219152509601e-09
AT1G78860	curculin-like (mannose-binding) lectin family protein, low similarity to Ser/Thr protein kinase (Zea mays) GI:2598067; contains Pfam profile PF01453: Lectin (probable mannose binding) but not the protein kinase domain of the Z. mays protein	GAL2	1.60159188278384	9.41438593342768e-13
AT1G78880	Plasma membrane-localized proteins that negatively regulate cellulose synthesis by inhibiting the exocytosis of CESAs.	SHOU4	0.223285525229002	0.00691879714423343
AT1G78890	hypothetical protein;(source:Araport11)	NA	0.520633881966289	1.61837981521264e-06
AT1G78895	Reticulon family protein;(source:Araport11)	NA	1.07123000523174	7.06121678042196e-11
AT1G78910	Pseudouridine synthase family protein;(source:Araport11)	NA	0.98609137607934	0.000570535176500616
AT1G78920	Encodes a type II H+-PPases that localizes to and function as a proton pump of the Golgi apparatus in most tissues except for mature leaves.	AtVHP21,AVP2,AVPL1,VHP21,VP2	0.293403196827077	0.000136957963772962
AT1G79010	Alpha-helical ferredoxin;(source:Araport11)	NA	0.286443777391088	0.00367367490401939
AT1G79110	Encodes one of the BRGs (BOI-related gene) involved in resistance to Botrytis cinerea.	BRG2	0.592584053483159	3.84166782696681e-05
AT1G79160	filamentous hemagglutinin transporter;(source:Araport11)	NA	0.286360285379912	0.0457077840867342
AT1G79340	Encodes MCP2d, the predominant and constitutively expressed member of type II metacaspases (MCPs). MCP2d plays a positive regulatory role in biotic and abiotic stress-induced programmed cell death (PCD). Arabidopsis contains three type I MCP genes (MCP1a-c) and six type II MCP genes (MCP2a?f): AtMCP1a/At5g64240, AtMCP1b/At1g02170, AtMCP1c/At4g25110, AtMCP2a/At1g79310, AtMCP2b/At1g79330, AtMCP2c/A…	AtMC4,AtMCP2d,MC4,MCP2d	0.249396716284724	0.0027961598378279
AT1G79360	organic cation/carnitine transporter 2;(source:Araport11)	ATOCT2,OCT2,OCT2	1.06479455104146	6.42738500534901e-07
AT1G79380	Encodes a ubiquitin ligase that is an essential upstream modulator of JA signaling in response to various stimuli.	RGLG4	0.441319563916561	1.73583581388801e-06
AT1G79440	Encodes a mitochondrial succinic semialdehyde dehydrogenase (SSADH). Nomenclature according to Kirch, et al (2004).	ALDH5F1,ENF1,SSADH,SSADH1	0.875263502086772	3.60328982909857e-13
AT1G79500	Encodes a protein with 3-deoxy-8-phosphooctulonate synthase (KDOP synthase) activity which is involved in the biosynthesis of KDO, a component of cell wall rhamnogalacturonan II.	AtkdsA1,KDO8PS	0.807950687127621	1.5346887156314e-08
AT1G79590	Encodes one of 24 Arabidopsis syntaxins. Its mRNA has been shown to be expressed.	ATSYP52,SYP52	0.430059448803134	0.000163346286956589
AT1G79650	Encodes a member of the RADIATION SENSITIVE23 (RAD23) family: AT1G16190(RAD23A), AT1G79650(RAD23B), AT3G02540(RAD23C), AT5G38470(RAD23D). RAD23 proteins play an essential role in the cell cycle, morphology, and fertility of plants through their delivery of UPS (ubiquitin/26S proteasome system) substrates to the 26S proteasome.	AtAO1,RAD23B	0.240929605938372	0.0257418404521597
AT1G79660	ephrin-A3 protein;(source:Araport11)	NA	0.457805402667206	0.00155318893389185
AT1G79670	Encodes a receptor-like kinase that does not contain an extracellular leucine-rich repeat domain. A novel type of dominant disease-resistance protein that confers resistance to a broad spectrum of Fusarium races.	RFO1,WAKL22	0.587990972624731	4.49612558245884e-08
AT1G79700	WRI4 encodes an AP2/ERF-type transcriptional activator that specifically controls cuticular wax biosynthesis in Arabidopsis stems. It also functions to activate transcription of genes involved fatty acid biosynthesis during seed and flower development as well as stem wax biosynthesis. Targets identified by ChIP-seq include: LACS1, KCR1, PAS2, ECR, and WSD1.	WRI4	2.15515845770305	1.12934462256908e-48
AT1G79730	Encodes a PAF1 homolog that is involved in the control of flowering time by elevating FLC expression to a level that creates the vernalization-responsive, winter-annual habit. Yeast PAF1 is a component of a five-member complex that associates with RNA pol II and is thought to regulate gene expression by recruiting SET1 (a histone 3 Lys 4 [H3-K4] methyl transferase) to the initially transcribed [5…	ELF7	0.276188374552696	0.0105693172729116
AT1G79740	hAT transposon superfamily;(source:Araport11)	NA	0.525764991265187	1.03744061738349e-07
AT1G79750	The malic enzyme (EC 1.1.1.40) encoded by AtNADP-ME4 is localized to chloroplasts. The gene is expressed throughout the whole plant and during embryogenesis and germination. A possible involvement in the fatty acid biosynthesis has been proposed.	ATNADP-ME4,NADP-ME4	0.733806976736385	7.89802262508779e-33
AT1G79830	This gene is predicted to encode a protein that functions as a Golgi apparatus structural component known as a golgin in mammals and yeast. A fluorescently-tagged version of GC5 co-localizes with Golgi markers, and this localization appears to be replicated using the C-terminal (139 aa) portion of the protein. The C-terminal portion of the protein can also specifically interact with two members o…	GC5	0.654780954917917	2.21011942197848e-17
AT1G79880	RNA recognition motif (RRM)-containing protein;(source:Araport11)	AtLa2,La2	0.901210551424251	1.92198843589838e-08
AT1G79900	encodes a mitochondrial ornithine transporter that exports ornithine from the mitochondria to the cytosol	ATMBAC2,BAC2	1.02330099062946	2.71751833138703e-07
AT1G79930	encodes high molecular weight heat shock protein 70 not a HSP90 homolog, mRNA is constitutively expressed but transiently induced after heat shock	AtHsp70-14,HSP91	0.213571828834015	0.00465435097949774
AT1G79940	J domain protein localized in ER membrane. Mutants have defective pollen germination.	ATERDJ2A	0.277535647629245	0.00092579084056271
AT1G79990	coatomer subunit beta-2;(source:Araport11)	NA	0.549930600984543	2.66986506030905e-11
AT1G80000	CASC3/Barentsz eIF4AIII binding protein;(source:Araport11)	NA	0.266651340873881	0.00686408155597338
AT1G80050	Encodes an adenosine phosphoribosyl transferase(E.C:2.4.2.7), a constitutively expressed enzyme involved in the one-step salvage of adenine to AMP. This isozyme has high affinity for cytokinins and is likely to be localized to the cytosol.	APT2,ATAPT2,PHT1.1	0.866751847127464	1.53257965845782e-06
AT1G80060	Ubiquitin-like superfamily protein;(source:Araport11)	NA	0.647177729838701	0.00792020785343613
AT1G80130	Tetratricopeptide repeat (TPR)-like superfamily protein;(source:Araport11)	NA	1.55674885198022	0.00126334836929744
AT1G80160	Vicinal oxygen chelate (VOC) superfamily member.	GLYI7	2.0492910454285	6.10419962564776e-22
AT1G80170	Pectin lyase-like superfamily protein;(source:Araport11)	NA	0.694640878149141	0.000648917496545681
AT1G80180	Encodes a substrate of the MAPK kinases. Phenotypic analyses of Arabidopsis expressing phosphorylation site mutant forms of At1g80180.1 showed clustered stomata and higher stomatal index in cotyledons expressing the phosphomimetic form of At1g80180.1. Tightly connected with MAPK signaling to fine-tune stomatal production and patterning.	NA	1.03099220990382	2.52457947767393e-11
AT1G80190	Similar to the PSF1 component of GINS complex, which in other organism was shown to be involved in the initiation of DNA replication.	PSF1	0.456096600702362	0.0302049636721635
AT1G80210	Mov34/MPN/PAD-1 family protein;(source:Araport11)	AtBRCC36A,BRCC36A	0.554550188502501	3.39638532637586e-05
AT1G80240	DUF642 gene	DGR1	1.04167442866336	2.79134554078947e-10
AT1G80260	Spc97 / Spc98 family of spindle pole body (SBP) component;(source:Araport11)	emb1427	0.436712459368364	2.52261939542873e-07
AT1G80280	alpha/beta-Hydrolases superfamily protein;(source:Araport11)	NA	2.18602422337395	1.70292960027241e-77
AT1G80290	a member of the Glycosyltransferase Family 64 (according to CAZy Database)	NA	0.380729158311998	0.0142646897433374
AT1G80310	MOT2 encodes a molybdate transporter which locates to the vacuolar membrane. Loss-of-function (knock out) mutants show elevated molydate levels in rosette leaves and in fully senescent leaves, but decreased MoO4 levels in seeds. Under conditions of molybdate deficiency leaves from mot2::tDNA mutants show strongly reduced nitrate reductase activity. The mot2 gene is slightly expressed in young and…	MOT2	0.242486822936518	0.0251893878682336
AT1G80325	Natural antisense transcript overlaps with AT1G80320;(source:Araport11)	NA	0.579258461940541	0.00938698652586064
AT1G80380	encodes a glycerate kinase which catalyzes the last step of photorespiration C2 cycle.	GLYK	0.233621099674088	0.00578987199487441
AT1G80420	Encodes a component of plant break excision repair and functions at several stages during active DNA demethylation in Arabidopsis.	ATXRCC1,XRCC1	1.16834426904378	1.67612389193561e-08
AT1G80440	Encodes a member of a family of F-box proteins, called the KISS ME DEADLY (KMD) family, that targets type-B ARR proteins for degradation and is involved in the negative regulation of the cytokinin response. Also named as KFB20, a member of a group of Kelch repeat F-box proteins that negatively regulate phenylpropanoid biosynthesis by targeting the phenypropanoid biosynthesis enzyme phenylalanine …	KFB20,KMD1	1.56823346013561	5.20477466417758e-60
AT1G80460	Encodes a protein similar to glycerol kinase, which converts glycerol to glycerol 3-phosphate and performs a rate-limiting step in glycerol metabolism. This gene is required for both general and specific resistance against bacteria and fungi. Arabidopsis thaliana glycerol kinase (GLR1) mRNA.Involved in flagellin-induced non-host resistance to Pseudomonas. Coronatine partially suppresses flagellin…	GLI1,NHO1	0.296873255393172	0.00340137436151723
AT1G80480	plastid transcriptionally active 17;(source:Araport11)	PTAC17	0.293001234347451	0.000526377613047806
AT1G80520	Sterile alpha motif (SAM) domain-containing protein;(source:Araport11)	NA	1.10577680368929	4.97517458586587e-05
AT1G80530	Major facilitator superfamily protein;(source:Araport11)	NA	0.722068445123032	1.08794665246024e-14
AT1G80550	Pentatricopeptide repeat (PPR) superfamily protein;(source:Araport11)	NA	0.55613327676402	0.00350800475088953
AT1G80570	RNI-like superfamily protein;(source:Araport11)	NA	1.266211044501	2.07439799646293e-28
AT1G80670	This gene is predicted to encode a protein with a DWD motif. It can bind to DDB1a in Y2H assays, and may be involved in the formation of a CUL4-based E3 ubiquitin ligase	RAE1	0.206348550956513	0.0458513895487693
AT1G80780	Deadenylase.	NA	0.25804148361402	0.00246101505345447
AT1G80830	Thought to be involved in iron homeostasis. Induced in leaves in response to iron deficiency. Transgenic plants accumulate toxic levels of iron. Gene complements yeast iron uptake mutants.	ATNRAMP1,NRAMP1,PMIT1	1.04743248210316	8.06433991979223e-27
AT1G80920	A nuclear encoded soluble protein found in the chloroplast stroma. Negatively regulated by light and has rapid turnover in darkness.	AtJ8,AtToc12,DJC22,J8,Toc12	0.578932130866199	1.71082322875579e-07
AT2G01060	myb-like HTH transcriptional regulator family protein;(source:Araport11)	NA	0.563596483789227	5.24940838932424e-08
AT2G01070	Lung seven transmembrane receptor family protein;(source:Araport11)	NA	0.546757013839332	7.22239395754118e-05
AT2G01080	Late embryogenesis abundant (LEA) hydroxyproline-rich glycoprotein family;(source:Araport11)	NA	1.29486517821232	8.4672638792819e-24
AT2G01100	FAM133-like protein;(source:Araport11)	NA	0.649189138095915	7.02315363297796e-05
AT2G01130	DEA(D/H)-box RNA helicase family protein;(source:Araport11)	NA	0.502496434428781	6.88582980595859e-06
AT2G01150	Encodes a RING-H2 finger protein that is expressed in vascular tissue, root tips, embryos and pistils.	RHA2B	1.13973381778813	6.99028502335017e-12
AT2G01170	Encodes a bidirectional amino acid transporter that can transport ala, arg, glu and lys, GABA but not pro with both export and import activity. Its expression is localized in the vascular tissues suggesting a function in amino acids export from the phloem into sink tissue.	AtGABP,BAT1,GABP	0.867611774833035	1.91186855832668e-19
AT2G01180	Encodes phosphatidate phosphatase. Up-regulated by genotoxic stress (gamma ray or UV-B) and elicitor treatments with mastoparan and harpin. Expressed in roots and leaves.	ATLPP1,ATPAP1,LPP1,PAP1	0.5121644330419	1.10103223526802e-05
AT2G01190	Octicosapeptide/Phox/Bem1p family protein;(source:Araport11)	PDE331	0.952367194724148	1.27413848625213e-35
AT2G01200	Belongs to auxin inducible gene family.	IAA32,MEE10	1.72136314251991	4.5005595590149e-05
AT2G01270	Encodes a protein disulfide isomerase-like (PDIL) protein, a member of a multigene family within the thioredoxin (TRX) superfamily. This protein also belongs to the quiescin-sulfhydryl oxidase (QSOX) family, which possess an Erv1-like domain at the COOH terminus in addition to a TRX domain.	AtQSOX2,QSOX2	0.353637572280151	0.000133788405512364
AT2G01320	ABC-2 type transporter family protein;(source:Araport11)	ABCG7	0.655602977297511	1.68931221488839e-10
AT2G01400	hypothetical protein;(source:Araport11)	NA	1.05246202908758	0.0012477514425538
AT2G01450	MPK17 Map kinase family member. Mutants have increased numbers of peroxisomes a phenotype that can be suppressed by mutations in PMD1. This and other treatments, suggests a function in control of peroxisome proliferation in salt stress.	ATMPK17,MPK17	2.15082845005162	1.24628180950515e-185
AT2G01460	P-loop containing nucleoside triphosphate hydrolases superfamily protein;(source:Araport11)	NA	0.293060962522816	0.00329186786114434
AT2G01470	Sec12p-like protein (GTP exchange protein) that functionally complements yeast sec12 null mutant. Protein is localized to the ER.	ATSEC12,STL2P	0.551505265083307	1.69444259310254e-05
AT2G01505	Member of a large family of putative ligands homologous to the Clavata3 gene. Consists of a single exon.	CLE16	0.763630667228895	0.0439060822046647
AT2G01530	MLP-like protein 329;(source:Araport11)	MLP329,ZCE2	1.43225902771197	3.62657836609127e-21
AT2G01540	Calcium-dependent lipid-binding (CaLB domain) family protein;(source:Araport11)	CAR10	0.427973682443587	0.0216906211144762
AT2G01570	Member of the VHIID/DELLA regulatory family. Contains homopolymeric serine and threonine residues, a putative nuclear localization signal, leucine heptad repeats, and an LXXLL motif. Putative transcriptional regulator repressing the gibberellin response and integration of phytohormone signalling. DELLAs repress cell proliferation and expansion that drives plant growth. The protein undergoes degra…	RGA,RGA1,RGA24	0.227051054561163	0.0051794007635189
AT2G01610	Plant invertase/pectin methylesterase inhibitor superfamily protein;(source:Araport11)	NA	1.6195573803956	6.26514024697408e-11
AT2G01650	encodes a peripheral membrane protein that contains UBX domain and interacts with AtCDC48 in vitro and co-fractionates with membrane-associated but not soluble AtCDC48 in vivo.	PUX2	0.472511224226229	4.45906464476449e-05
AT2G01660	Encodes a plasmodesmal protein that may be involved in the intercellular movement of molecules through the plasmodesmata. The protein has two DUF26 domains and a single transmembrane domain.	PDLP6	0.580884645900403	0.000231137664409806
AT2G01680	Ankyrin repeat family protein;(source:Araport11)	NA	0.511466215144968	0.000240380489468894
AT2G01710	SDJ2 functions partially redundantly with SDJ1 and SDJ3 and interacts with SUVH1 and SUVH3 to form a SUVH-SDJ complex. The complex binds promoters with DNA methylation and mediates transcriptional activation of promoter methylated genes.	SDJ2	0.627247900815059	2.91932835471564e-09
AT2G01735	encodes a RING-H2 zinc finger protein essential for seed development.	RIE1	0.521456106333486	0.00104220310633266
AT2G01770	Encodes an iron transporter required for iron sequestration into vacuoles. Expressed in developing embryo and seed. Localized in the vacuolar membrane.	ATVIT1,VIT1	5.25087984112649	2.22026357814743e-05
AT2G01818	PLATZ transcription factor family protein;(source:Araport11)	NA	0.892520471584716	0.0438825598349769
AT2G01900	Encodes an inositol polyphosphate phosphatidylinositol 5-phosphatase that is expressed in roots and is involved in mediating salt tolerance through endocytosis.	t5ptase9	0.780025270339956	0.00178790367518982
AT2G01930	BASIC PENTACYSTEINE1 (BPC1) is a regulator of the homeotic Arabidopsis thaliana gene SEEDSTICK (STK), which controls ovule identity. BPC1 induces conformational changes by cooperative binding to purine-rich elements present in the STK regulatory sequence. STK is upregulated in bpc1 mutant.Along with BPC2, BPC1 binds to the promoter of and represses GALS1 thereby reducing beta 1,4- galactan accumu…	ATBPC1,BBR,BPC1	0.42463945900625	0.000393410519012339
AT2G01940	Encodes a transcription factor that, together with IDD14 and IDD16, regulates auxin biosynthesis and transport and thus aerial organ morphogenesis and gravitropic responses. May be involved in an early event in shoot gravitropism such as gravity perception and/or a signaling process subsequent to amyloplast sedimentation as a putative transcription factor in gravity-perceptive cells.	ATIDD15,IDD15,SGR5	1.03312762322091	8.09352549640292e-12
AT2G01950	Encodes a leucine rich repeat receptor kinase and associated with provascular/procambial cells. Similar to BRI, brassinosteroid receptor protein.	BRL2,VH1	0.296775251199682	0.00365768208681965
AT2G01990	XRI1-like protein;(source:Araport11)	NA	0.753623228264011	0.0283593803549411
AT2G02060	Homeodomain-like superfamily protein;(source:Araport11)	NA	0.935375837661364	0.0127554661479613
AT2G02080	C2H2 BIRD transcription factor family.	AtIDD4,IDD4,IME	0.870530473585527	6.70830915677347e-16
AT2G02160	Non- tandem CCCH zinc finger protein.	AtC3H17,C3H17	0.636212160370649	1.07555762845297e-13
AT2G02170	Remorin family protein;(source:Araport11)	NA	1.6106555356483	4.89516846793529e-20
AT2G02180	Necessary for the efficient multiplication of tobamoviruses. The mRNA is cell-to-cell mobile.	TOM3	0.388614760051643	0.000784467056511572
AT2G02220	Encodes a protein interacting with phytosulfokine, a five amino acid sulfated peptide (YIYTQ). Contains dual guanylate cyclase and kinase catalytic activities that operate in vivo.	ATPSKR1,PSKR1	0.441638525321925	1.43118881915911e-05
AT2G02370	SNARE associated Golgi protein family;(source:Araport11)	NA	0.469682129318131	0.000808670919870852
AT2G02450	NAC domain containing protein 35;(source:Araport11)	ANAC034,ANAC035,AtLOV1,LOV1,NAC035	0.66011043349256	0.00573467215092711
AT2G02510	NADH dehydrogenase (ubiquinone)s;(source:Araport11)	NA	0.310727177539592	0.0112422923832905
AT2G02570	Similar to SPF30 splicing factor. Under circadian control. Mutants have defects in alternative splicing and show more intron retention compared to wt.	NA	1.30956693066313	1.55680288313153e-18
AT2G02630	Cysteine/Histidine-rich C1 domain family protein;(source:Araport11)	NA	1.62947058964552	3.79614687064135e-07
AT2G02680	Cysteine/Histidine-rich C1 domain family protein;(source:Araport11)	NA	0.871647786816701	1.1133774594927e-09
AT2G02700	Cysteine/Histidine-rich C1 domain family protein;(source:Araport11)	NA	2.19111402572016	0.00113012310168111
AT2G02710	Encodes a putative blue light receptor protein.	PLP,PLPA,PLPB,PLPC	0.58046787671269	8.40532151622155e-09
AT2G02765	L-aminoadipate-semialdehyde dehydrogenase-phosphopantetheinyl transferase;(source:Araport11)	NA	0.866385511039531	0.000381912524029979
AT2G02820	Encodes a putative transcription factor (MYB88), involved in stomata development, double loss of MYB88 and FLP (MYB124) activity results in a failure of guard mother cells (GMCs) to adopt the guard cell fate, thus they continue to divide resulting in abnormal stomata consisting of clusters of numerous guard cell-like cells. This phenotype is enhanced in double mutants over the single mutant flp p…	AtMYB88,MYB88	0.382092457474183	0.00644385203718149
AT2G02930	Encodes glutathione transferase belonging to the phi class of GSTs. Naming convention according to Wagner et al. (2002).	ATGSTF3,GST16,GSTF3	2.60811062808364	2.02498615145872e-13
AT2G02960	RING/FYVE/PHD zinc finger superfamily protein;(source:Araport11)	NA	0.281272022688943	0.00278219708261756
AT2G02970	Encodes a putative apyrase involved in pollen exine pattern formation and anther dehiscence.	APY6,AtAPY6	0.299681298452026	0.000366085550334711
AT2G03330	transmembrane protein;(source:Araport11)	NA	0.929719545367323	2.51236710822141e-06
AT2G03590	Encodes a member of a class of allantoin transporters.	ATUPS1,UPS1	1.04351236274308	3.99501765924637e-05
AT2G03680	The SPR1 gene encodes a plant-specific 12-kD protein which has a repeated motif at both ends, separated by a predicted rod-like domain, suggesting that it may act as an intermolecular linker. Ubiquitously expressed and belongs to a six-member gene family in Arabidopsis; expressed in transgenic seedlings localized to microtubules within the cortical array, preprophase band, phragmoplast, and mitot…	SKU6,SPR1	0.515958230890777	7.91106135163264e-07
AT2G03690	Ubiquinone biosynthesis protein COQ4 homolog.	NA	0.40872054971908	0.0264547405346926
AT2G03890	Phosphoinositide kinase which undergo autophosphorylation and phosphorylate serine/threonine residues of protein substrates. Contains phosphoinositide 3/4-kinase and ubiquitin-like domains. The mRNA is cell-to-cell mobile.	ATPI4K_GAMMA_7,PI4K_GAMMA_7,UBDK_GAMMA_7	1.19790234680403	4.14842344845159e-57
AT2G03975	Natural antisense transcript overlaps with AT2G01410;(source:Araport11)	NA	0.899173194667679	0.00101509354677086
AT2G04038	basic leucine-zipper 48;(source:Araport11)	AtbZIP48,bZIP48	1.51133758150346	0.00948780938847474
AT2G04090	MATE efflux family protein;(source:Araport11)	NA	0.696260849624883	0.00399449434704636
AT2G04160	isolated from differential screening of a cDNA library from auxin-treated root culture. encodes a protein similar to subtilisin-like serine protease which is believed to be active outside the plant cell.	AIR3	0.387984295037445	0.000165739937886109
AT2G04230	FBD, F-box and Leucine Rich Repeat domains containing protein;(source:Araport11)	NA	0.342844923440926	0.00715364910162738
AT2G04240	Encodes a small protein with an N-terminal trans-membrane domain and a RING-H2 zinc finger motif located at the C-terminus. Gene expression is induced by salt and osmotic stress. Transcrips levels are induced by DELLA proteins and repressed by gibberellic acid. Involved in ABA metabolism.	XERICO	0.819964694981449	3.25197520589768e-10
AT2G04378		NA	0.519050454881477	1.69784363282354e-09
AT2G04410	RPM1-interacting protein 4 (RIN4) family protein;(source:Araport11)	NA	0.441428565630281	0.000614247080960194
AT2G04500	Cysteine/Histidine-rich C1 domain family protein;(source:Araport11)	NA	1.63941333538788	8.09188206997102e-07
AT2G04540	Encodes a mitochondrial beta-ketoacyl-ACP synthase.	mtKAS	0.790481435059644	9.37573528473347e-10
AT2G04550	Encodes a protein phosphatase that interacts with MPK12, but not with other MAP kinases. It can dephosphorylate a dually phosphorylated MPK12 in vitro and can inactivate MPK12 in vivo. ibr5 mutants have reduced sensitivity to auxin and abscisic acid. IBR5 promotes auxin responses, including auxin-inducible transcription, differently than the TIR1 auxin receptor and without destabilizing Aux/IAA r…	DSPTP1E,IBR5	0.317006736547654	0.00566624990642251
AT2G04690	Pyridoxamine 5-phosphate oxidase family protein;(source:Araport11)	NA	1.24361854242437	1.15064814939047e-30
AT2G04852	Potential natural antisense gene, locus overlaps with AT2G04850	NA	1.37605971286453	0.0116287000642927
AT2G04890	Encodes a scarecrow-like protein (SCL21). Member of GRAS gene family.	SCL21	0.91236874939257	2.63178021302343e-10
AT2G04900	hypothetical protein;(source:Araport11)	NA	0.32696851774354	0.0148004185980528
AT2G04940	scramblase-like protein;(source:Araport11)	NA	0.4227583085513	0.000337384542673159
AT2G05170	Homologous to yeast VPS11. Forms a complex with VCL1 and AtVPS33. Involved in vacuolar biogenesis. The mRNA is cell-to-cell mobile.	ATVPS11,VPS11	0.250880773809167	0.00123921010164274
AT2G05180	member of CYP705A	CYP705A6	1.14618783083807	6.62360523537504e-06
AT2G05185	hypothetical protein;(source:Araport11)	NA	0.62221987602845	0.0412070761975031
AT2G05380	glycine-rich protein 3 short isoform (GRP3S) mRNA, complete The mRNA is cell-to-cell mobile.	GRP3S	0.905857942016043	7.68891870701523e-10
AT2G05540	Glycine-rich protein family;(source:Araport11)	NA	0.279509072826203	0.021700008363393
AT2G05812	Natural antisense transcript overlaps with AT2G05810;(source:Araport11)	NA	0.445457378556821	0.0166588151252945
AT2G05830	Encodes a 5-methylthioribose-1-phosphate isomerase.	MTI1,MTI1	0.321912068612619	0.00246824480972896
AT2G06010	encodes a novel protein whose expression level is induced in lines overexpressing salicylic-acid (SA)-inducible Arabidopsis DNA binding with one finger (Dof) transcription factor, called OBF-binding protein 3.	ORG4	0.498429445831849	0.000693288363182007
AT2G06200	Growth regulating factor encoding transcription activator. One of the nine members of a GRF gene family, containing nuclear targeting domain. Involved in leaf development and expressed in root, shoot and flower	AtGRF6,GRF6	1.18654658561392	0.00315249298545756
AT2G06850	endoxyloglucan transferase (EXGT-A1) gene	EXGT-A1,EXT,XTH4	0.719668237550098	1.10258843305099e-07
AT2G07050	Involved in the biosynthesis of brassinosteroids. Catalyzes the reaction from epoxysqualene to cycloartenol.	CAS1	0.241456999904205	0.00183271995906525
AT2G07180	Protein kinase superfamily protein;(source:Araport11)	NA	1.78908986142187	1.76004183649109e-34
AT2G07360	TPLATE-associated SH3 domain containing protein.	TASH3	0.276150537499488	8.28577326306584e-05
AT2G07687	Cytochrome c oxidase, subunit III;(source:Araport11)	NA	0.441251732132106	5.44251419486284e-06
AT2G07695	Cytochrome C oxidase subunit II-like, transmembrane domain-containing protein;(source:Araport11)	NA	0.386775985985693	2.20943356286756e-05
AT2G07698	ATPase, F1 complex, alpha subunit protein;(source:Araport11)	NA	0.240312747205905	0.00708208184530209
AT2G07702	hypothetical protein;(source:Araport11)	NA	0.911659460073262	0.0138934908164732
AT2G07707	Plant mitochondrial ATPase, F0 complex, subunit 8 protein;(source:Araport11)	NA	0.246657524646611	0.0165283434069864
AT2G07727	cytochrome b;(source:Araport11)	NA	0.200772497658478	0.00792020785343613
AT2G09090	Natural antisense transcript overlaps with AT2G39930;(source:Araport11)	NA	1.68378323135286	0.00148215997032956
AT2G10931	hypothetical protein;(source:Araport11)	NA	0.909557913910556	0.00657445468447979
AT2G11225	hypothetical protein;(source:Araport11)	NA	0.523693905466992	0.000499855070662987
AT2G11810	MGD3 is the major enzyme for galactolipid metabolism during phosphate starvation. Does not contribute to galactolipid synthesis under P1-sufficient conditions.	ATMGD3,MGD3,MGDC	2.34227616114845	0.00103145419691611
AT2G12190	Cytochrome P450 superfamily protein;(source:Araport11)	NA	1.07427538278006	4.13843078802194e-06
AT2G12462	sterile alpha motif (SAM) domain protein;(source:Araport11)	NA	0.904510958443944	0.000216052431491729
AT2G13547	hypothetical protein;(source:Araport11)	NA	1.91652629539616	0.0183130271384797
AT2G13665	Natural antisense transcript overlaps with AT2G13660;(source:Araport11)	NA	0.786731377094118	0.00086464902640058
AT2G13820	Bifunctional inhibitor/lipid-transfer protein/seed storage 2S albumin superfamily protein;(source:Araport11)	AtXYP2,XYP2	0.51700228538328	1.98318603123079e-05
AT2G13840	Polymerase/histidinol phosphatase-like protein;(source:Araport11)	NA	0.718849191753652	0.00285618643846704
AT2G14100	a member of the cytochrome P450 family	CYP705A13	0.561524900260559	0.00256377196700266
AT2G14170	Arabidopsis thaliana methylmalonate-semialdehyde dehydrogenase	ALDH6B2	1.35469944934756	2.7968016734029e-67
AT2G14210	MADS box gene, transcription factor	AGL44,ANR1,AtANR1	1.24914362593203	7.63522890507674e-07
AT2G14247	Expressed protein;(source:Araport11)	NA	2.2495331726609	3.26335314138347e-05
AT2G14260	encodes proline iminopeptidase	PIP	0.602710318637601	1.05188477385776e-05
AT2G14530	Encodes a member of the TBL (TRICHOME BIREFRINGENCE-LIKE) gene family containing a plant-specific DUF231 (domain of unknown function) domain. TBL gene family has 46 members, two of which (TBR/AT5G06700 and TBL3/AT5G01360) have been shown to be involved in the synthesis and deposition of secondary wall cellulose, presumably by influencing the esterification state of pectic polymers. A nomenclature…	TBL13	0.542882561448738	0.0002063919128193
AT2G14720	encodes a vacuolar sorting receptor	BP80-21,MTV4,VSR21,VSR4	0.186580931383965	0.0440070995710286
AT2G14835	RING/U-box superfamily protein;(source:Araport11)	NA	0.311507695070655	0.00219697452501241
AT2G14878	other_RNA;(source:Araport11)	NA	0.750921844353074	3.76670991833142e-21
AT2G14890	putative proline-rich protein (At2g14890) mRNA, complete The mRNA is cell-to-cell mobile.	AGP9	0.779922699211896	3.38930364545184e-10
AT2G14900	Gibberellin-regulated family protein;(source:Araport11)	NA	2.8215446065151	5.20739742252725e-16
AT2G14910	MAR-binding filament-like protein;(source:Araport11)	NA	0.218856371648815	0.000955096567173994
AT2G14960	encodes a protein similar to IAA-amido synthases. Lines carrying an insertion in this gene are hypersensitive to auxin.	GH3.1	1.35574594135031	1.55296860696486e-06
AT2G15090	Encodes KCS8, a member of the 3-ketoacyl-CoA synthase family involved in the biosynthesis of VLCFA (very long chain fatty acids). The mRNA is cell-to-cell mobile.	KCS8	0.31453932127516	0.0167065900516144
AT2G15230	Lipase active on medium and short chain triacylglycerols, but not on phospho- or galactolipids. Active between pH4 and 7 with an optimum at pH6. Knock-out mutant has not obvious phenotype. Predicted to be extracellular.	ATLIP1,LIP1	0.426097547314705	0.000421910304793031
AT2G15240	UNC-50 family protein;(source:Araport11)	NA	0.611421781840646	8.79334095816365e-09
AT2G15320	Leucine-rich repeat (LRR) family protein;(source:Araport11)	NA	0.560439182361304	0.00140577073277338
AT2G15570	chloroplast protein similar to prokaryotic thioredoxin.	ATHM3,ATM3,GAT1,TRX-M3	0.753822409242986	4.1073559380178e-11
AT2G15695	peptide methionine sulfoxide reductase (Protein of unknown function DUF829, transmembrane 53);(source:Araport11)	NA	0.591348608634379	1.47791762056825e-08
AT2G15830	hypothetical protein;(source:Araport11)	NA	1.87503310874752	7.26416192158147e-24
AT2G15880	Pollen expressed protein required for pollen tube growth.Along with other members of the LRX family, itnteracts with RALF4 to control pollen tube growth and integrity. Loss of function results in premature pollen tube rupture and reduced fertility.	LRX10	2.84365242116454	8.35038643154462e-133
AT2G15890	Encodes CBP1, a regulator of transcription initiation in central cell-mediated pollen tube guidance.	CBP1,MEE14	1.69402578478714	5.44792067879996e-32
AT2G15900	Encodes a member of the Arabidopsis sorting nexin family.	NA	0.489567652295042	1.1124983097706e-08
AT2G15960	Unknown protein. Expression decreased in response to proline.	NA	1.26565695369954	0.000903768481960973
AT2G15980	Tetratricopeptide repeat (TPR)-like superfamily protein;(source:Araport11)	NA	0.72210306795173	0.000158661679673088
AT2G16050	Cysteine/Histidine-rich C1 domain family protein;(source:Araport11)	NA	0.926676333882817	0.0032971944069839
AT2G16060	Encodes a class 1 nonsymbiotic hemoglobin induced by low oxygen levels with very high oxygen affinity. It is not likely to be a hemoglobin transporter because of its extremely high affinity for oxygen. Overexpression impairs cold stress-induced nitric oxide (NO) production.	AHB1,ARATH_GLB1,ATGLB1,GLB1,HB1,NSHB1,Pgb1	1.49396969743584	1.04367956959375e-08
AT2G16190	hypothetical protein;(source:Araport11)	NA	1.28979822729599	0.00388872455649255
AT2G16230	O-Glycosyl hydrolases family 17 protein;(source:Araport11)	NA	0.834756861815845	0.0128598940519147
AT2G16390	Putative chromatin remodeling protein, member of a plant-specific subfamily of SWI2/SNF2-like proteins. Mutations nearly eliminate non-CpG methylation at a target promoter but do not affect rDNA or centromere methylation. Cooperates with PolIVb to facilitate RNA-directed de novo methylation and silencing of homologous DNA. Endogenous targets include intergenic regions near retrotransposon LTRs or…	CHR35,DMS1,DRD1	0.670300896615449	9.89346121594564e-06
AT2G16530	Encodes polyprenol reductase involved in N-gylcosylation. Mutants are defective in pollen development. Knockouts are embryo lethal	PPRD2	0.615005710097418	2.72061267569893e-05
AT2G16600	Encodes cytosolic cyclophilin ROC3. The mRNA is cell-to-cell mobile.	AtCYP19-1,CYP19,ROC3	0.506160349848582	1.13245785193277e-05
AT2G16740	ubiquitin-conjugating enzyme 29;(source:Araport11)	UBC29	0.874386403991043	1.48784157276164e-09
AT2G16930	Ribosomal protein L27 family protein;(source:Araport11)	NA	0.541451314428655	0.000418915055420861
AT2G16940	Splicing factor which interacts with IRR and SR45 to mediate pre-mRNA splicing to facilitate protein function, however not contributing to target specificity.	NA	0.37052379829673	7.11664943205172e-05
AT2G16970	Major facilitator superfamily protein;(source:Araport11)	MEE15	1.08971783129253	0.00794817115715495
AT2G16980	Major facilitator superfamily protein;(source:Araport11)	NA	1.26554849453402	2.88140666861689e-09
AT2G16990	Major facilitator superfamily protein;(source:Araport11)	NA	0.335640178232826	0.0468950669957268
AT2G17020	F-box/RNI-like superfamily protein;(source:Araport11)	NA	0.316563732572021	0.00581628710307442
AT2G17030	Encodes a SKP1/ASK-interacting protein.	AtSKIP23,SKIP23	0.456914426792421	0.00260316719317918
AT2G17036	F-box SKIP23-like protein (DUF295);(source:Araport11)	NA	1.48370319880836	1.20920909542422e-15
AT2G17060	Disease resistance protein (TIR-NBS-LRR class) family;(source:Araport11)	NA	0.838429064666823	0.0102238878458285
AT2G17110	DNA-directed RNA polymerase subunit beta, putative (DUF630 and DUF632);(source:Araport11)	NA	0.430285859136726	0.00260795294374159
AT2G17130	Encodes a regulatory subunit of the mitochondrially-localized NAD+- dependent isocitrate dehydrogenase.	IDH-II,IDH2	0.310315538847926	0.0100529902575258
AT2G17200	Encodes a ubiquitin receptor protein that specifically associates with PEX2 and PEX12.	DSK2,DSK2b	0.327791748257664	5.92578237018884e-06
AT2G17265	Encodes a homoserine kinase (HSK) which produces O-phospho-L-homoserine (HserP), a compound at the branching point of methionine and threonine biosynthesis. HSK is found in the stromal fraction of chloroplasts. Mutation of this gene results in higher level of the amino acid homoserine and resistance to downy mildew pathogen Hyaloperonospora arabidopsidis.	DMR1,HSK	0.303411346310649	0.00360027896146433
AT2G17290	Encodes calcium dependent protein kinase 6 (CPK6), a member of the Arabidopsis CDPK gene family. CDPKs contain an intrinsic Ca2+-activation domain with four EF hand Ca2+-binding sites. CDPKs protein kinases have been proposed to function in multiple plant signal transduction pathways downstream of [Ca2+]cyt elevations, thus transducing various physiological responses. CPK6 is expressed in both gu…	ATCDPK3,ATCPK6,CPK6	0.553234661344847	4.77124707038495e-10
AT2G17320	pantothenate kinase;(source:Araport11)	NA	0.576530204886185	4.99198915063617e-05
AT2G17370	Encodes a 3-hydroxy-3-methylglutaryl-CoA reductase (HMGR) that is involved in the synthesis of sterol and triterpenoid compounds.	HMG2,HMGR2	0.82388510181416	4.80557122881649e-13
AT2G17380	Encodes clathrin assembly protein AP19. The mRNA is cell-to-cell mobile.	AP19	0.38487267940079	0.00566966479920334
AT2G17390	Highly homologous to AKR2A. Involved in chloroplast biogenesis. Double mutants of AKR2A and AKR2B have yellow leaves, significantly reduced chloroplast proteins, and no thylakoid membranes. The mRNA is cell-to-cell mobile.	AKR2B	0.219682612615803	0.0106666910061975
AT2G17440	Encodes PIRL5, a member of the Plant Intracellular Ras-group-related LRRs (Leucine rich repeat proteins). PIRLs are a distinct, plant-specific class of intracellular LRRs that likely mediate protein interactions, possibly in the context of signal transduction. The mRNA is cell-to-cell mobile.	PIRL5	0.403836492412021	1.13379163216879e-06
AT2G17450	Encodes a putative RING-H2 finger protein RHA3a.	RHA3A	0.850798509546529	5.66556843238008e-18
AT2G17520	Encodes a endoribonuclease/protein kinase IRE1-like protein that is predicted to form a type I transmembrane protein structure and contain kinase/endoribonuclease domains at their C-terminal halves. The transcript levels for several ER-stress responsive genes, including six protein disulfide isomerases (PDIs), BiP2, and AtbZIP60 are not affected in ire1-2 null mutants. The mRNA is cell-to-cell mo…	ATIRE1-2,AtIRE1A,IRE1-2,IRE1A	0.653762374275351	1.11042233417067e-16
AT2G17540	hypothetical protein;(source:Araport11)	NA	0.403136619904935	0.00982139739959676
AT2G17550	RB1-inducible coiled-coil protein;(source:Araport11)	TRM26	0.522366979381226	0.000112727642249253
AT2G17570	Undecaprenyl pyrophosphate synthetase family protein;(source:Araport11)	AtcPT1,cPT1	0.633533275518562	0.00660004075949884
AT2G17705	methionine-S-oxide reductase;(source:Araport11)	NA	0.645518079406399	0.000725294641678493
AT2G17710	Big1;(source:Araport11)	NA	0.790710655397965	1.06924592477638e-17
AT2G17787	cylicin;(source:Araport11)	NA	0.652049623547047	5.92087453325258e-05
AT2G17850	Rhodanese/Cell cycle control phosphatase superfamily protein;(source:Araport11)	NA	3.18752083060725	0.00293529915651585
AT2G17880	Chaperone DnaJ-domain superfamily protein;(source:Araport11)	DJC24	2.79874744561581	4.80141859804502e-93
AT2G17975	SRP1 is a C2C2 type zinc finger protein that binds RNA. It has a role in response to ABA.. It can bind the 3'UTR of ABI2 and appears to be involved in RNA turnover.	SRP1	0.573355719629271	0.00955507308178568
AT2G17980	member of SLY1 Gene Family The mRNA is cell-to-cell mobile.	ATSLY1	0.214852543266467	0.0121311193134667
AT2G17990	Calcium-dependent protein kinase 1 adaptor protein involved in vacuolar transport and lytic vacuole biogenesis.	AtCAP2	0.643173300754212	2.59190151617139e-05
AT2G18010	SAUR-like auxin-responsive protein family;(source:Araport11)	SAUR10	2.10743687343037	0.00053819917894548
AT2G18050	encodes a structurally divergent linker histone whose gene expression is induced by dehydration and ABA. The mRNA is cell-to-cell mobile.	HIS1-3	2.00065807666317	2.5720328789365e-17
AT2G18110	Translation elongation factor EF1B/ribosomal protein S6 family protein;(source:Araport11)	NA	0.303183923963615	0.000744619398092338
AT2G18170	MAP kinase 7;(source:Araport11)	ATMPK7,MPK7	0.694659857569523	2.41133696493591e-11
AT2G18196	Heavy metal transport/detoxification superfamily protein;(source:Araport11)	NA	1.76263645823363	1.07604069039222e-07
AT2G18250	At2g18250 encodes pantetheine-phosphate adenylyltransferase catalyzing the formation of dephospho-CoA from pantetheine 4'-phosphate. The enzyme is involved in coenzyme A biosynthesis.	ATCOAD,COAD	1.23791943587346	1.1285747432481e-08
AT2G18280	Member of TLP family The mRNA is cell-to-cell mobile.	AtTLP2,TLP2	0.927322700097853	1.62424650968813e-36
AT2G18350	homeobox protein 24;(source:Araport11)	AtHB24,HB24,ZHD6	0.988297091801793	0.000214278184504249
AT2G18390	Encodes a member of ARF-like GTPase family. A thaliana has 21 members, in two subfamilies, ARF and ARF-like (ARL) GTPases. Mutant has abnormal mitosis and cell cycle control during seed development.	ARL2,ATARLC1,HAL,TTN5	0.868368050160572	4.0967122360299e-05
AT2G18440	Encodes a noncoding RNA, a member of an emerging class of transcripts that lack significant open reading frames and encode RNA as their final product. Has been identified as a translated small open reading frame by ribosome profiling.	GUT15,sORF20	1.12618044584084	4.40951979534416e-45
AT2G18670	RING/U-box superfamily protein;(source:Araport11)	NA	0.521411872063209	0.000505175892191099
AT2G18710	Encodes a component of the thylakoid-localized Sec system involved in the translocation of cytoplasmic proteins into plastid.	SCY1	0.230277324108545	0.0060583212667813
AT2G18730	diacylglycerol kinase 3;(source:Araport11)	ATDGK3,DGK3	0.406987432634635	0.000847305548651957
AT2G18750	Calmodulin-binding protein;(source:Araport11)	NA	0.427361221295798	5.91149516424278e-06
AT2G18840	Encodes one of the two YPT/RAB GTPase Interacting Protein 4a (YIP4a) and YIP4b (formerly YIP2), which form a TGN-localized complex with ECHIDNA (ECH). This complex is required for the secretion of cell wall polysaccharides.	YIP4a	0.399345454418053	0.000990476230105841
AT2G18876	Encodes a microtubule-associated protein.	NA	0.397720595806613	0.0470940188635207
AT2G18915	encodes a member of F-box proteins that includes two other proteins in Arabidopsis (ZTL and FKF1). These proteins contain a unique structure containing a PAS domain at their N-terminus, an F-box motif, and 6 kelch repeats at their C-terminus. Overexpression results in arrhythmic phenotypes for a number of circadian clock outputs in both constant light and constant darkness, long hypocotyls under …	ADO2,LKP2	0.263360787214249	0.0441715175985501
AT2G18960	Encodes a plasma membrane proton ATPase. Mutants have a reduced ability to close their stomata in response to drought and are affected in stomatal but not seed responsiveness to ABA. The mRNA is cell-to-cell mobile.	AHA1,HA1,OST2,PMA	0.454140360731553	4.19804218196422e-11
AT2G18969	Encodes a atypical member of the bHLH (basic helix-loop-helix) family transcriptional factors.	NA	2.08702227215406	0.00013177965587838
AT2G19110	Encodes a protein with similarity to Zn ATPase. Can rescue Zn deficiency in yeast and Cd resistance, suggesting a role in Zn and Cd transport. The mRNA is cell-to-cell mobile.	ATHMA4,HMA4	0.272908078751997	0.00265104122113256
AT2G19130	S-locus lectin protein kinase family protein;(source:Araport11)	NA	0.352415695345477	0.0097580428661028
AT2G19450	Encodes Acyl-CoA:diacylglycerol acyltransferase (DGAT) catalyzes the final step of the triacylglycerol synthesis pathway. An insertion mutation in the TAG1 gene results in altered lipid phenotype. Role in senescence and seed development. Its preferred substrate is linolenoyl-CoA (C18:3-CoA).	ABX45,AS11,ATDGAT,AtDGAT1,DGAT1,RDS1,TAG1	0.572452387680075	1.71705031274139e-08
AT2G19480	This gene is predicted to encode a nucleosome assembly protein. Plant lines expressing an RNAi construct directed against this gene show a reduction in agrobacterium-mediated root transformation. The mRNA is cell-to-cell mobile. Plants mutated in three ubiquitously expressed NAP1 genes (NAP1;1~NAP1;3) and organ-specifically expressed NAP1;4 gene show hypersensitivity to genotoxic stresses includi…	NAP12,NFA02,NFA2	0.260664149568162	0.013483572732
AT2G19570	Encodes a cytidine deaminase that deaminates cytidine and deoxycytidine and is competitively inhibited by cytosine-containing compounds.	AT-CDA1,CDA1,DESZ	0.473881151997061	4.28757952728364e-07
AT2G19572	Potential natural antisense gene, locus overlaps with AT2G19570	NA	1.56065477564851	1.67824750864965e-08
AT2G19580	Member of TETRASPANIN family	TET2	0.329774648980728	0.0295914738398348
AT2G19590	encodes a protein whose sequence is similar to 1-aminocyclopropane-1-carboxylate oxidase	ACO1,ATACO1	0.890572781838218	0.000932289754043026
AT2G19660	Cysteine/Histidine-rich C1 domain family protein;(source:Araport11)	NA	3.54982075665201	8.6437279411798e-93
AT2G19760	first member of the Arabidopsis profilin multigene family, expressed in all organs of Arabidopsis. Binds poly-L-proline. The first intron of PRF1 enhances gene expression in vegetative tissues.	PFN1,PRF1	0.331376482266732	0.0116287000642927
AT2G19790	Encodes a component of the AP4 complex and is involved in vacuolar sorting of storage proteins.	AP4S	0.430844908827658	0.00793353367107489
AT2G19800	Encodes a myo-inositol oxygenase family gene.	MIOX2	0.802667649966438	1.43828058516179e-06
AT2G19810	Encodes Oxidation-related Zinc Finger 1 (OZF1), a plasma membrane protein involved in oxidative stress.	AtOZF1,AtTZF2,OZF1,TZF2	1.97210110179776	5.22532916257721e-53
AT2G19950	This gene is predicted to encode a protein that functions as a Golgi apparatus structural component known as a golgin in mammals and yeast. A fluorescently-tagged version of GC1 co-localizes with Golgi markers, and this localization appears to be replicated using the C-terminal (558-715 aa) portion of the protein.	GC1	0.338169543840164	0.00182915789171874
AT2G19970	CAP (Cysteine-rich secretory proteins, Antigen 5, and Pathogenesis-related 1 protein) superfamily protein;(source:Araport11)	NA	0.93108812631883	0.000947922128026521
AT2G20080	hypothetical protein;(source:Araport11)	TIE2	1.50476453909388	1.9572073691619e-05
AT2G20100	Together with PFA1 and PFA3 governs the competence of pericycle cells to initiate lateral root primordium formation.	UKTF1	0.502203088673171	0.00515035185776477
AT2G20120	Encodes an integral membrane protein of unknown function, highly conserved between plants and bacteria; is likely to be involved in a mechanism that negatively regulates the differentiation of vascular tissue in the stem. Mutants display a dramatic increase in vascular tissue development in the stem in place of the interfascicular region that normally separates the vascular bundles.	COV1	0.908306665024321	9.80300911279547e-23
AT2G20230	Tetraspanin family protein;(source:Araport11)	NA	0.394454344638024	3.85901433557234e-07
AT2G20370	Encodes a xyloglucan galactosyltransferase located in the membrane of Golgi stacks that is involved in the biosynthesis of fucose. It is also involved in endomembrane organization. It is suggested that it is a dual-function protein that is responsible for actin organization and the synthesis of cell wall materials. The mRNA is cell-to-cell mobile.	AtMUR3,KAM1,MUR3,RSA3	0.236474899686335	0.0287086508755042
AT2G20410	RNA-binding ASCH domain protein;(source:Araport11)	NA	0.433267308610772	0.0250820142726556
AT2G20515	pollen Ole e I family allergen protein;(source:Araport11)	NA	1.09730498294015	0.00492554567283195
AT2G20550	HSP40/DnaJ peptide-binding protein;(source:Araport11)	NA	0.558277902213591	0.0256115562101743
AT2G20670	sugar phosphate exchanger, putative (DUF506);(source:Araport11)	NA	0.481177284900264	0.000589593885482063
AT2G20680	Encodes a mannanase belonging to clade 1 of the GH5 7 phylogenetic tree that exhibits high substrate affinity and catalytic efficiency on mannan substrates with main chains containing both glucose and mannose units such as konjac glucomannan and spruce galactoglucomannan. It is likely a glycoprotein.	AtMAN2,MAN2,MAN5-2	0.873308425841071	3.02260503045582e-07
AT2G20740	Tetraspanin family protein;(source:Araport11)	NA	0.443119169207754	0.000193706468823609
AT2G20750	member of BETA-EXPANSINS. Naming convention from the Expansin Working Group (Kende et al, 2004. Plant Mol Bio)	ATEXPB1,ATHEXP_BETA_1.5,EXPB1	1.08096428761059	8.08048846761461e-09
AT2G20770	Encodes a protein with reported similarity to GCR2 a putative G protein coupled receptor thought to be an ABA receptor.GCL2 also has similarity to LANCL1 and LANCL2, human homologs of bacterial lanthionine synthetase.	GCL2	0.928579123802813	0.0272145796472085
AT2G20780	Major facilitator superfamily protein;(source:Araport11)	NA	0.666337579838278	1.67758723842579e-12
AT2G20790	clathrin adaptor complexes medium subunit family protein;(source:Araport11)	NA	0.222726626147349	0.0242339021866088
AT2G20820	hypothetical protein;(source:Araport11)	NA	0.580750157547969	1.36875008216194e-11
AT2G20835	hypothetical protein;(source:Araport11)	NA	1.65173307292852	0.00132821895797562
AT2G20840	Secretory carrier membrane protein (SCAMP) family protein;(source:Araport11)	AtSCAMP3,SCAMP3	0.479967466591974	0.000197178540146731
AT2G20860	LIP1,Lipoic acid synthase,	LIP1	0.286766345339283	0.00211587109144942
AT2G20880	Encodes ERF53, a drought-induced transcription factor. Belongs to the AP2/ERF superfamily, and has a highly conserved AP2 domain. Regulates drought-responsive gene expressions by binding to the GCC box and/or dehydration-responsive element (DRE) in the promoter of downstream genes. Overexpression of AtERF53 driven by the CaMV35S promoter resulted in an unstable drought-tolerant phenotype in T2 tr…	AtERF53,ERF53	1.65946158297141	0.000454160667360293
AT2G20930	Part of multi-protein complex, acting as guanine nucleotide exchange factors (GEFs) and possibly as tethers, regulating intracellular trafficking.	NA	0.51783896777452	0.00013343271933733
AT2G20950	phospholipase-like protein (PEARLI 4) family protein;(source:Araport11)	NA	0.643180473043921	9.21356725492085e-09
AT2G20960	phospholipase-like protein (PEARLI 4) family protein;(source:Araport11)	pEARLI4	0.454918886225464	4.02762511987224e-08
AT2G21050	Encodes LAX2 (LIKE AUXIN RESISTANT), a member of the AUX1 LAX family of auxin influx carriers. Required for the establishment of embryonic root cell organization.	LAX2	0.690452318363411	1.24871009923408e-08
AT2G21060	Glycine-rich protein (AtGRP2b). Also named as CSP4 (cold shock domain protein 4) containing a well conserved cold shock domain (CSD) and glycine-rich motifs interspersed by two retroviral-like CCHC zinc fingers. AtCSP4 is expressed in all tissues but accumulates in reproductive tissues and those undergoing cell divisions. Overexpression of AtCSP4 reduces silique length and induces embryo lethalit…	ATCSP4,ATGRP2B,GRP2B	1.04475279082759	4.8606879723556e-14
AT2G21070	This gene is predicted to an encode a nuclear-localized protein that is involved in regulating the period of circadian rhythms without affecting their amplitude or robustness. FIONA1 seems to act as a central oscillator-associated component, but its transcript levels are not regulated in a circadian or light-dependent manner. FIONA1 also appears to be involved in photoperiod-dependent flowering.	FIO1	0.637764432850878	6.54043320824845e-05
AT2G21170	Encodes a plastidic triose phosphate isomerase. Mutants with reduced pdTPI levels have difficulty transitioning from heterotrophic to autotrophic growth. The related phenotypes, such as chlorosis in light-grown seedlings may result from an accumulation of dihydroxyacetone phosphate (DHAP) and methylglyoxal (MG) in these mutants. Both splice variants appear to be expressed, but the At2g21170.2 var…	PDTPI,TIM	0.172957877724073	0.0151631192723132
AT2G21195	hypothetical protein;(source:Araport11)	NA	0.874184044794599	0.00469749762490733
AT2G21200	SAUR-like auxin-responsive protein family;(source:Araport11)	SAUR7	1.86401015328429	0.0463055511277165
AT2G21240	Encodes a member of the BASIC PENTACYSTEINE (BPC) proteins. BPC proteins are plant-specific transcription factors present throughout land plants. BPC transcription factor family is integral for a wide range of processes that support normal growth and development.	ATBPC4,BBR,BPC4	0.670221255827594	2.73728876626350e-11
AT2G21390	Coatomer subunit alpha-2. Part of endomembrane trafficking system. Interacts with SINAT1.	NA	0.301414731537508	1.39747821894829e-05
AT2G21410	Vacuolar proton ATPase subunit VHA-a isoform 2. Localized in the tonoplast. Required for efficient nutrient storage but not for sodium accumulation.	VHA-A2	0.318385582083478	4.13366094377952e-06
AT2G21500	RING/U-box superfamily protein;(source:Araport11)	NA	0.715584115557192	3.15787918663167e-08
AT2G21520	Sec14p-like phosphatidylinositol transfer family protein;(source:Araport11)	NA	0.174233117309675	0.0299714880106694
AT2G21540	SEC14-like 3;(source:Araport11)	ATSFH3,SFH3	0.476994867015399	6.74111552283951e-06
AT2G21580	Ribosomal protein S25 family protein;(source:Araport11)	NA	0.348446236712521	0.000358070594809948
AT2G21620	Encodes gene that is induced in response to desiccation; mRNA expression is seen 10 and 24 hrs after start of desiccation treatment.	RD2	0.354722022571124	0.000769528378976116
AT2G21630	Sec23/Sec24 protein transport family protein;(source:Araport11)	AtSEC23C	0.719132294111545	2.26733680412994e-06
AT2G21660	Encodes a small glycine-rich RNA binding protein that is part of a negative-feedback loop through which AtGRP7 regulates the circadian oscillations of its own transcript. Gene expression is induced by cold. GRP7 appears to promote stomatal opening and reduce tolerance under salt and dehydration stress conditions, but, promotes stomatal closing and thereby increases stress tolerance under conditio…	ATGRP7,CCR2,GR-RBP7,GRP7,RBGA3	1.67551334100838	6.83593388969604e-66
AT2G21840	Cysteine/Histidine-rich C1 domain family protein;(source:Araport11)	NA	0.362240456316736	0.0387360538915579
AT2G21850	Cysteine/Histidine-rich C1 domain family protein;(source:Araport11)	NA	0.456601906609374	0.000722889382398551
AT2G21870	Encodes the FAd subunit of mitochondrial F1F0-ATP synthase. Essential for pollen formation.	MGP1,PHI1	0.211670883184538	0.0167500882298904
AT2G21880	RAB GTPase homolog 7A;(source:Araport11)	ATRAB7A,ATRABG2,RAB7A	1.35881763481819	0.00011314835140358
AT2G21910	member of CYP96A	CYP96A5	5.48656412087515	6.55970260685215e-130
AT2G22080	transmembrane protein;(source:Araport11)	NA	0.82148966321859	5.78352733678236e-05
AT2G22122	hypothetical protein;(source:Araport11)	NA	1.7806781469026	0.000756085114656635
AT2G22125	Encodes a protein involved in cell elongation in root and anther filaments. Mutants have greater cell volumes in root tissues and have additive phenotypes with other cell expansion mutants such as those carrying mutations in COB, QUI and POM1 loci. POM2/CSI1 promotes Cellulose Synthase and microtubule co-alignment. The mRNA is cell-to-cell mobile.	CSI1,POM2	0.22720927610823	0.000868692595101481
AT2G22300	Encodes a putative CAM binding transcription factor. Loss of function mutations show enhanced resistance to fungal and bacterial pathogens suggesting that CAMTA functions to suppress defense responses.It acts in the cold response pathway, it can bind to and activate the expression of DREB1 genes.	CAMTA3,SR1	0.198247159420754	0.0285434320784389
AT2G22310	Encodes a ubiquitin-specific protease.	ATUBP4,UBP4	0.800683484003818	0.00257604908244059
AT2G22330	Encodes a cytochrome P450. Involved in tryptophan metabolism. Converts Trp to indole-3-acetaldoxime (IAOx), a precursor to IAA and indole glucosinolates. The mRNA is cell-to-cell mobile.	CYP79B3	1.10768398792135	4.13133048570579e-22
AT2G22400	TRM4B is a cytosine-5--methyltransferase. Mutants have decreased methyl cytosine and defects in root development.	AtTRM4b,TRM4B	0.380413516014806	5.32767883972099e-05
AT2G22425	Microsomal signal peptidase 12 kDa subunit (SPC12);(source:Araport11)	NA	0.723396606297192	0.0490092243744071
AT2G22430	Encodes a homeodomain leucine zipper class I (HD-Zip I) protein that is a target of the protein phosphatase ABI1 and regulates hormone responses in Arabidopsis.	ATHB6,HB6	0.355178118253732	0.000584983972737241
AT2G22450	riboflavin biosynthesis protein;(source:Araport11)	AtRIBA2,RIBA2	1.99898176510049	2.93903348782109e-28
AT2G22480	Phosphofructokinase isoform; target of plastidic thioredoxin-f-dependent redox regulation.	PFK5	0.314159549519829	0.00116443844334281
AT2G22490	encodes a D-type cyclin whose transcription level is regulated by sucrose but not phytohormones or nitrate. Protein physically interacts with CDC2A. CycD2 kinase activity is regulated by sequestration of CycD2 protein in a form inaccessible to immunoprecipitation and probably not complexed to CDC2A.	ATCYCD21,CYCD21	0.310632589028941	0.0159188594348994
AT2G22500	Encodes one of the mitochondrial dicarboxylate carriers (DIC): DIC1 (AT2G22500), DIC2 (AT4G24570), DIC3 (AT5G09470).	ATPUMP5,DIC1,UCP5	0.392774110841585	0.0120881039138153
AT2G22540	Encodes a nuclear protein that acts as a floral repressor and that functions within the thermosensory pathway. SVP represses FT expression via direct binding to the vCArG III motif in the FT promoter.	AGL22,FAQ1,SVP	0.761182688465383	0.000115548104366669
AT2G22660	Encodes a member of a family of DUF1399 domain containing proteins. GRDP1 is involved in germination and response to ABA. Loss of function mutants have reduced germination in the presence of osmotic stressors.	AtGRDP1	1.18299894075388	1.91248420278631e-54
AT2G22670	Encodes a transcriptional repressor of the auxin response that is auxin inducible and is involved in lateral root formation. The mRNA is cell-to-cell mobile.	IAA8	0.184030233229096	0.0407828923385042
AT2G22680	Zinc finger (C3HC4-type RING finger) family protein;(source:Araport11)	WAVH1	1.46637714459762	1.51664450120733e-55
AT2G22690	zinc ion binding protein;(source:Araport11)	NA	0.380703571823201	0.0180659971119579
AT2G22720	SPT2 chromatin protein;(source:Araport11)	NA	0.248853866903069	0.0158892095398946
AT2G22730	Major facilitator superfamily protein;(source:Araport11)	NA	0.721631576473881	0.0129761579476761
AT2G22780	encodes an peroxisomal NAD-malate dehydrogenase that is involved in fatty acid beta-oxidation through providing NAD to the process of converting fatty acyl CoA to acetyl CoA.	PMDH1	0.287117456880949	0.000425230726030687
AT2G22830	squalene epoxidase 2;(source:Araport11)	SQE2	0.603152899082476	0.00243056977359761
AT2G22840	Growth regulating factor encoding transcription activator. One of the nine members of a GRF gene family, containing nuclear targeting domain. Mutants result in smaller leaves indicating the role of the gene in leaf development. Expressed in root, shoot and flower	AtGRF1,GRF1	0.72431445315066	6.23577090526186e-09
AT2G22890	Kua-ubiquitin conjugating enzyme hybrid localization domain-containing protein;(source:Araport11)	NA	0.959626624105343	2.97392458474466e-08
AT2G22900	Encodes MUCI10, a galactomannan-1,6-galactosyltransferase. MUCI10 likely decorates glucomannan, synthesized by CSLA2, with galactose residues in vivo. The degree of galactosylation is essential for the synthesis of the GGM backbone, the structure of cellulose, mucilage density, as well as the adherence of pectin.	MAGT1,MUCI10	0.863973121170781	6.14342955516466e-11
AT2G22970	serine carboxypeptidase-like 11;(source:Araport11)	SCPL11	0.706490356122263	2.83533271462922e-06
AT2G23030	encodes a member of SNF1-related protein kinases (SnRK2)	SNRK2-9,SNRK2.9	1.50632900209429	9.225846726995e-10
AT2G23070	Encodes a chloroplast localized subunit of casien kinase4. Functions reduntantly with other alpha subunits (1, 2,and 3) in ABA mediated suppression of seed germination, lateral root development and flowering time.	CKA4,cpCK2	0.41490369160295	1.45019077460556e-07
AT2G23310	Encodes AtRER1C1, a Golgi membrane protein involved in returning the molecules that are exported from the endoplasmic reticulum (ER) to the Golgi apparatus back to the ER (a mechanism known as retrieval). There are two Arabidopsis homologues of AtRERC1: AtRER1A and AtRER1B.	ATRER1C1	0.402902879187688	2.40837959460186e-05
AT2G23450	Protein kinase superfamily protein;(source:Araport11)	NA	0.284701948684671	0.00128925018087808
AT2G23620	Encodes a protein shown to have carboxylesterase activity, methyl salicylate esterase activity, methyl jasmonate esterase activity, and methyl IAA esterase activity in vitro. MES1 appears to be involved in MeSA hydrolysis in planta. Expression of MES1 can restore systemic acquired resistance in SAR-deficient tobacco plants. This protein does not act on MeGA4, or MEGA9 in vitro.	ATMES1,MES1	0.60505580393772	0.000299823866934906
AT2G23790	calcium uniporter (DUF607);(source:Araport11)	NA	0.552789029445389	3.68810606225654e-05
AT2G23810	Member of TETRASPANIN family	TET8	0.307837262513754	0.00287976282857248
AT2G23980	Encodes a cyclic GMP-activated non-selective cation channel in the plasma membrane of guard cells. Required for constitutive growth of root hairs as Ca2+-permeable channels.	ATCNGC6,CNGC6	0.354701063603441	2.82173837471659e-05
AT2G24070	QWRF motif protein (DUF566);(source:Araport11)	QWRF4	1.15586770433454	0.000347941746062245
AT2G24170	Endomembrane protein 70 protein family;(source:Araport11)	NA	0.592447847579912	2.01207578539919e-07
AT2G24200	Cytosol aminopeptidase family protein;(source:Araport11)	atLAP1,LAP1	0.46081475116607	1.5962781726395e-09
AT2G24220	Member of a family of proteins related to PUP1, a purine transporter. May be involved in the transport of purine and purine derivatives such as cytokinins, across the plasma membrane.	ATPUP5,PUP5	1.75145564826212	1.3786005840262e-12
AT2G24240	BTB/POZ domain with WD40/YVTN repeat-like protein;(source:Araport11)	NA	0.854304603564568	5.41609344366639e-10
AT2G24260	Encodes a basic helix-loop-helix (bHLH) protein that regulates root hair and sperm cell development. One of the three Arabidopsis homologs of the Lotus japonicus ROOTHAIRLESS1 (LjRHL1) gene: At2g24260 (AtLRL1), At4g30980 (AtLRL2), and At5g58010 (AtLRL3).	DROP1,LRL1	0.878126834828322	4.62293056026656e-19
AT2G24270	Encodes a protein with non-phosphorylating NADP-dependent glyceraldehyde-3-phosphate dehydrogenase activity. The activity of the enzyme was determined from leaf extracts; the enzyme has not been purified to confirm activity.	ALDH11A3	0.320598814311596	0.000249390772403513
AT2G24290	ubiquitin-associated protein (DUF1068);(source:Araport11)	NA	1.04050508527547	2.43556318863965e-16
AT2G24300	Calmodulin-binding protein;(source:Araport11)	NA	1.62411156548103	2.10422144625847e-23
AT2G24360	STYK serine threonine kinase that phosphorylates several oil body proteins including OLE1 and CLO4/CAL4.	RAF22,STYK	0.419544601991764	6.84976303727553e-06
AT2G24520	plasma membrane H+-ATPase;(source:Araport11)	AHA5,HA5	0.258802164987254	0.0497453556653512
AT2G24530	Member of SAGA complex, SPT modulu subunit, interacts with HAG1.	NA	0.590657315346979	0.00461230896645343
AT2G24765	GTPase required for Golgi targeting of GRIP domain proteins. AtARL1 binds directly to the GRIP domain of AtGRIP in a GTP-dependent manner	ARF3,ARL1,ATARL1	0.704242720559666	7.26649986560012e-08
AT2G24800	Peroxidase superfamily protein;(source:Araport11)	NA	0.557899623557364	0.0466282876718577
AT2G24940	membrane-associated progesterone binding protein 2;(source:Araport11)	AtMAPR2,MAPR2	0.275376606422844	0.0280467337700978
AT2G24945	transmembrane protein;(source:Araport11)	NA	0.749303470309865	0.00150919523290975
AT2G25000	Pathogen-induced transcription factor. Forms protein complexes with itself and with WRKY40. Coexpression with WRKY18 or WRKY40 made plants more susceptible to both P. syringae and B. cinerea. WRKY18, WRKY40, and WRKY60 have partially redundant roles in response to the hemibiotrophic bacterial pathogen Pseudomonas syringae and the necrotrophic fungal pathogen Botrytis cinerea, with WRKY18 playing …	ATWRKY60,WRKY60	1.13647086992466	0.0339200801045733
AT2G25010	Encodes a nuclear localized aminotransferase like protein containing a plant mobile domain. MAIL1 is expressed in the root, SAM, leaves, flowers and embryo. Loss of function mutations display defects in root and shoot growth. In the root, primary root growth terminates early. In the shoot, leaf development is delayed, and lateral organs are smaller than normal. MAIL1 appears to affect meristem ce…	MAIL1	0.406252436499896	0.02522000639095
AT2G25070	Protein phosphatase 2C family protein;(source:Araport11)	NA	0.458020095556621	1.11587196458191e-06
AT2G25130	ARM repeat superfamily protein;(source:Araport11)	NA	2.02764795395978	3.45943783687417e-05
AT2G25250	serine/arginine repetitive matrix-like protein;(source:Araport11)	NA	0.314064065344498	0.0254799124140922
AT2G25260	Hyp O-arabinosyltransferase-like protein;(source:Araport11)	HPAT2	0.695031977748096	4.45906464476449e-05
AT2G25280	AmmeMemoRadiSam system protein B;(source:Araport11)	NA	0.262477414968134	0.0322890775733846
AT2G25300	Encodes a hydroxyproline O-galactosyltransferase.	HPGT3	0.508648751220062	0.0410694375132859
AT2G25310	ER membrane protein complex subunit-like protein (DUF2012);(source:Araport11)	NA	0.391581426582411	0.000149559996945696
AT2G25350	Phox (PX) domain-containing protein;(source:Araport11)	NA	0.543083218543306	0.00548415578583573
AT2G25490	Encodes an F-box protein involved in the ubiquitin/proteasome-dependent proteolysis of EIN3. The mRNA is cell-to-cell mobile.	EBF1,FBL6	0.638676910034604	5.36356570051947e-17
AT2G25520	Drug/metabolite transporter superfamily protein;(source:Araport11)	NA	0.184233803187579	0.0269706086135376
AT2G25590	Plant Tudor-like protein;(source:Araport11)	NA	0.927880768660454	2.40409057384758e-09
AT2G25690	DUF581 family protein, putative (DUF581);(source:Araport11)	NA	0.587409178706644	0.000649573822455616
AT2G25730	zinc finger FYVE domain protein;(source:Araport11)	NA	0.146103548677004	0.0382963243431575
AT2G25740	ATP-dependent protease La (LON) domain protein;(source:Araport11)	NA	0.281111297619766	0.0299702193936783
AT2G25760	Casein kinase involved in phosphorylation and ubiquination of RYR/PYLs, resulting in negative regulation of ABA response. Plays a role in repressing the transition from vegetative to reproductive phase.	AEL1,MLK3,PPK4	0.407814019563141	1.12810819339448e-05
AT2G25790	Leucine-rich receptor-like protein kinase family protein;(source:Araport11)	SKM1	0.601285568050586	2.62100406724523e-12
AT2G25850	Encodes a poly(A) polymerase. Located in the nucleus.	PAPS2	0.601700775287167	4.86296694756285e-12
AT2G25900	Encodes a protein with two tandem-arrayed CCCH-type zinc fingers that binds RNA and is involved in RNA turnover. The mRNA is cell-to-cell mobile.	ATCTH,ATTZF1,TZF1	1.75652774314447	1.15040020711196e-58
AT2G25910	3-5 exonuclease domain-containing protein / K homology domain-containing protein / KH domain-containing protein;(source:Araport11)	NA	0.729001805578974	9.13790545114111e-16
AT2G25964	hypothetical protein;(source:Araport11)	NA	1.65998625865359	5.90370873063329e-05
AT2G25970	KH domain-containing protein;(source:Araport11)	NA	0.384536138237027	5.5582695586232e-07
AT2G25980	Mannose-binding lectin superfamily protein;(source:Araport11)	NA	0.430366353752345	0.0272038827192741
AT2G26030	F-box/RNI-like/FBD-like domains-containing protein;(source:Araport11)	NA	0.715895709333351	8.57481827035572e-07
AT2G26060	Encodes a homolog of the yeast Cytosolic Iron-sulfur protein Assembly protein CIA1.	CIA1,emb1345	0.406039324364627	0.00118345894376915
AT2G26070	Encodes a predicted membrane protein. Similar sequences are widely distributed and conserved in plants, animals and protists but absent in fungi and prokaryotes. The sequence has no known motifs and no biological function has been assigned in any species. In Arabidopsis, it appears to be involved in the negative regulation of the response to ethylene, is localized to the Golgi and is a positive r…	AtRTE1,RTE1	1.15534765006897	7.07029319545849e-15
AT2G26210	Ankyrin repeat family protein;(source:Araport11)	NA	1.06268241719803	3.4141305748211e-22
AT2G26230	Encodes a urate oxidase that is involved in peroxisome maintenance.	UOX	0.366076534658768	2.25097961153041e-05
AT2G26240	Transmembrane proteins 14C;(source:Araport11)	NA	0.705722318994667	1.34925470356631e-05
AT2G26300	Encodes an alpha subunit of a heterotrimeric GTP-binding protein. The active GTP-bound form of GPA1 binds to the GTG1 and GTG2 abscisic acid (ABA) receptors and appears to affect their GTPase and GTP-binding activity, and hence, ABA binding abilities. GPA1 is a positive regulator in ABA-mediated inhibition of stomatal opening. Plants with recessive mutant alleles have complex phenotypes including…	ATGPA1,GP_ALPHA_1,GPA1	0.531916159135499	0.000280440850665474
AT2G26330	Homologous to receptor protein kinases. Involved in specification of organs originating from the shoot apical meristem. Contains a cytoplasmic protein kinase catalytic domain, a transmembrane region, and an extracellular leucine-rich repeat. ER has been identified as a quantitative trait locus for transpiration efficiency by influencing epidermal and mesophyll development, stomatal density and po…	ER,QRP1	0.808007514643797	5.85856309663691e-25
AT2G26350	Zinc-binding peroxisomal integral membrane protein (PEX10). Inserted directly from the cytosol into peroxisomes and is involved in importing proteins into the peroxisome. Required for embryogenesis.	ATPEX10,PEX10	0.323896747335336	0.0321698399138088
AT2G26355	Natural antisense transcript overlaps with AT2G26360. The RNA is cell-to-cell mobile.	NA	0.539947312954925	4.41801542278623e-09
AT2G26360	Mitochondrial substrate carrier family protein;(source:Araport11)	NA	0.878465481153845	0.0141665551682012
AT2G26390	Serine protease inhibitor (SERPIN) family protein;(source:Araport11). Involved in stress response regulated cell death.	SERP4	1.74897164569029	0.00103577930830981
AT2G26430	Encodes an ania-6a type arginine-rich cyclin which confers tolerance to LiCl and NaCl when expressed in yeast.	ATRCY1,MOS12,RCY1	0.667380252481291	5.15153131734775e-12
AT2G26440	Plant invertase/pectin methylesterase inhibitor superfamily;(source:Araport11)	PME12	2.67234448493542	4.86039299470524e-17
AT2G26510	Encodes a plasma-membrane localized nucleobase transporter capable of transporting adenine, guanine, uracil and hypoxanthine. Likely to be a proton-nucleobase symporter.	NAT3,PDE135	0.236029032112165	0.0170233650623686
AT2G26640	Encodes KCS11, a member of the 3-ketoacyl-CoA synthase family involved in the biosynthesis of VLCFA (very long chain fatty acids).	KCS11	0.34668374440821	0.00118345894376915
AT2G26650	Encodes AKT1, a member of the Shaker family inward rectifying potassium channel predominantly expressed in predominantly in root hairs and root endodermis. This family includes five groups based on phylogenetic analysis (FEBS Letters (2007) 581: 2357): I (inward rectifying channel): AKT1 (AT2G26650), AKT5 (AT4G32500) and SPIK (also known as AKT6, AT2G25600); II (inward rectifying channel): KAT1 (…	AKT1,ATAKT1,KT1	0.724170272776607	1.11233972622153e-13
AT2G26670	Encodes a plastid heme oxygenase necessary for phytochrome chromophore biosynthesis and for coupling the expression of some nuclear genes to the functional state of the chloroplast.	ATHO1,GUN2,HO1,HY1,HY6,TED4	0.354489346848183	0.000101714255403514
AT2G26695	Ran BP2/NZF zinc finger-like superfamily protein;(source:Araport11)	NA	2.13542508937468	0.00299239272835469
AT2G26710	Encodes a member of the cytochrome p450 family that serves as a control point between multiple photoreceptor systems and brassinosteroid signal transduction. Involved in brassinolide metabolism. Mediates response to a variety of light signals including hypocotyl elongation and cotyledon expansion.	BAS1,CYP72B1,CYP734A1	1.22377352486222	2.46616889198909e-20
AT2G26740	Encodes a soluble epoxide hydrolase whose expression is induced by auxin and water stress.	ATSEH,SEH	0.941706856558977	1.4029472462831e-14
AT2G27010	member of CYP705A	CYP705A9	1.15078268857644	5.1241450946819e-12
AT2G27050	ethylene-insensitive3-like1 (EIL1) The mRNA is cell-to-cell mobile.	AtEIL1,EIL1	0.28594789320747	0.00147388530513032
AT2G27190	Encodes a root-secreted purple acid phosphatase involved in extracellular phosphate-scavenging. PEP complex component.	ATPAP12,PAP12	0.464388370809689	0.000531710647065638
AT2G27200	Encodes a cytosolic protein that shares 77.3% identity with AtLSG1-2 at the protein sequence level. The mRNA is cell-to-cell mobile.	LSG1-1	0.409984121921942	0.0140829274701926
AT2G27340	N-acetylglucosaminylphosphatidylinositol de-N-acetylase family protein;(source:Araport11)	NA	0.640715971515875	0.000135135933390912
AT2G27460	Sec23 homolog , forms a distinct clade with SEC23A.Mutants have defects in pollen exine patterning, tapetal development and pollen intine formation.	AtSEC23D	0.420926257508685	4.16114647011265e-05
AT2G27500	Glycosyl hydrolase superfamily protein;(source:Araport11)	NA	0.511896430142035	4.7241549390332e-05
AT2G27690	Encodes a CYP94C1. Has highest omega-hydroxylase activity with 9,10-epoxystearic acid, while also metabolized lauric acid (C12:0) and C18 unsaturated fatty acids. Gene expression is induced in response to wounding and jasmonic acid treatment.	CYP94C1	1.03086389417736	0.00101644003236892
AT2G27830	hypothetical protein;(source:Araport11)	NA	1.52692788766305	6.27053595860554e-45
AT2G27860	Encodes UDP-d-apiose/UDP-d-xylose synthase that requires NAD+ for enzymatic activity and is strongly inhibited by UDP-d-galacturonate.	AXS1	0.6805039678955	1.17001456363706e-20
AT2G27930	PLATZ transcription factor family protein;(source:Araport11)	NA	1.13274067885106	0.000649610411376011
AT2G28070	ABC-2 type transporter family protein;(source:Araport11)	ABCG3	0.447852980190065	0.000288079391921316
AT2G28100	Encodes a protein with &	ATFUC1,FUC1	0.565398552127247	4.34361712435434e-06
AT2G28110	Homolog to AT5G22940, a member of glycosyltransferase family 47 that is involved in secondary cell wall biosynthesis. It exhibits high sequence similarity to tobacco (Nicotiana plumbaginifolia) pectin glucuronyltransferase. Protein has a domain that shares significant similarity with the pfam03016 domain. It is expressed specifically in developing vessels and fiber cells, and FRA8 is targeted to …	FRA8,IRX7	0.988635687882997	3.06511351817288e-17
AT2G28120	Major facilitator superfamily protein;(source:Araport11)	OTU1	0.278370283702808	0.0421724659316775
AT2G28140	enabled-like protein (DUF1635);(source:Araport11)	NA	1.48514922010146	0.00130083917077514
AT2G28160	Encodes a putative transcription factor that regulates iron uptake responses. mRNA is detected in the outer cell layers of the root and accumulates in response to iron deficiency. The expression of many iron-regulated genes is dependent on FIT1. It specifically regulates FRO2 at the level of mRNA accumulation and IRT1 at the level of protein accumulation.Similar to FER in tomato and is a regulato…	ATBHLH029,ATBHLH29,ATFIT1,BHLH029,FIT,FIT1,FRU	0.756615194322957	0.00736254388216055
AT2G28200	C2H2-type zinc finger family protein;(source:Araport11)	NA	0.730166873911348	7.51681534340537e-11
AT2G28240	ATP-dependent helicase family protein;(source:Araport11)	NA	0.508025182935393	0.0291252830398621
AT2G28270	Cysteine/Histidine-rich C1 domain family protein;(source:Araport11)	NA	2.1081738667077	0.00281018379803785
AT2G28360	SIT4 phosphatase-associated family protein;(source:Araport11)	NA	0.524273247398416	6.94556549002894e-07
AT2G28370	Uncharacterized protein family (UPF0497);(source:Araport11)	CASPL5A2	0.284738033064392	0.001270035327796
AT2G28390	SAND family protein;(source:Araport11)	MON1	0.216179997784567	0.0221731347520906
AT2G28450	zinc finger (CCCH-type) family protein;(source:Araport11)	TRM2b	0.661415548325389	2.42518681583728e-10
AT2G28460	Cysteine/Histidine-rich C1 domain family protein;(source:Araport11)	NA	0.772015796235573	0.000315829773060493
AT2G28570	hypothetical protein;(source:Araport11)	NA	1.89367039253186	1.66370510035839e-14
AT2G28630	Encodes KCS12, a member of the 3-ketoacyl-CoA synthase family involved in the biosynthesis of VLCFA (very long chain fatty acids).	KCS12	2.65780507684856	2.81213206443421e-44
AT2G28660	Chloroplast-targeted copper chaperone protein;(source:Araport11)	NA	0.526903296559063	0.00371501303423839
AT2G28670	Encodes a protein of unknown function that is involved in formation of the casparian strip. ESB1 is localized to the casparian strip and this localization is depended on CASP1 and 2. esb1 mutants have increased levels of suberin, disordered casparian strip and altered levels of several ions in their leaves.	ESB1	0.462294250879228	7.68567314980735e-06
AT2G28780	P-hydroxybenzoic acid efflux pump subunit;(source:Araport11)	NA	0.271051232878244	0.00986169149967817
AT2G28830	Encodes a U-box E3 ubiquitin ligase involved in ubiquitination of pattern recognition receptor FLS2.pub12/pub13 double mutants enhanced chitin-induced ROS production and callose deposition suggesting they function redundantly to negatively regulate immune response to fungal elicitor.	AtPUB12,PUB12	0.565209292377959	0.0035334324979122
AT2G28840	Putative E3 Ub protein ligase; regulates thermoresponsive hypocotyl growth through mediating degradation of the thermosensor ELF3.	XBAT31	1.84432653183427	3.08509124226144e-136
AT2G28850	member of CYP710A	CYP710A3	3.57781323034033	0.0189497335245763
AT2G28860	member of CYP710A	CYP710A4	1.39628333628706	3.00183590376801e-17
AT2G28890	Encodes a protein phosphatase 2C like gene, similar to POL. Involved in leaf development. Knockout mutants have abnormally shaped leaves.	PLL4	0.657956900141937	2.32225740789932e-15
AT2G28900	Encodes AtOEP16, a 16-KDa plastid outer membrane protein involved in plastid import of protochlorophyllide oxidoreductase A. Predominantly expressed in leaves and is also inducible by cold treatment.	ATOEP16-1,ATOEP16-L,OEP16,OEP16-1	0.95393187986894	6.57867815668489e-07
AT2G28910	Encodes a CAX-interacting protein (CXIP4). The gene product is located in the nucleus of GFP-CXIP4-expressing yeast cells. When transiently expressed in the tobacco leaves, GFP-CXIP4 locates to the nucleus as well as in discrete areas of the cytoplasm (which do not overlap with mitochondria).	CXIP4	0.554148845125087	1.24880782721383e-06
AT2G28940	Protein kinase superfamily protein;(source:Araport11)	NA	0.557425001635021	0.00391207058661873
AT2G28960	Leucine-rich repeat protein kinase family protein;(source:Araport11)	NA	0.542229338321353	0.0288688405224586
AT2G28970	Leucine-rich repeat protein kinase family protein;(source:Araport11)	NA	0.974634714155921	0.0190574712595724
AT2G29020	Rab5-interacting family protein;(source:Araport11)	NA	0.987531299816941	6.05413334517226e-16
AT2G29060	GRAS family transcription factor;(source:Araport11)	NA	0.921396317284067	3.86237795307758e-11
AT2G29210	splicing factor PWI domain-containing protein;(source:Araport11)	NA	0.175180582446917	0.0374913733185582
AT2G29330	tropinone reductase;(source:Araport11)	TRI	0.459839493381059	0.0310148649382256
AT2G29400	Type 1 protein phosphatase, expressed in roots, rosettes and flowers	PP1-AT,TOPP1	0.641193660685008	4.36618646638231e-13
AT2G29620	dentin sialophosphoprotein;(source:Araport11)	NA	0.859142139552978	0.000231158159346134
AT2G29660	zinc finger (C2H2 type) family protein;(source:Araport11)	NA	0.480113194919581	0.000460904046451563
AT2G29670	Tetratricopeptide repeat (TPR)-like superfamily protein;(source:Araport11)	NA	0.411933190464358	0.0118504265437565
AT2G29720	Encodes CTF2B.	CTF2B	1.4147128307741	5.24684359749164e-09
AT2G29730	UDP-glucosyl transferase 71D1;(source:Araport11)	UGT71D1	0.834518437199417	9.02069510283165e-11
AT2G29740	UDP-glucosyl transferase 71C2;(source:Araport11)	UGT71C2	0.407327377479547	0.0229771782424367
AT2G29990	alternative NAD(P)H dehydrogenase 2;(source:Araport11)	NDA2	0.373533595786398	0.0371223415741618
AT2G30260	encodes U2B", which is a component of the U2 snRNP complex. Its precise role in pre-mRNA splicing is still unknown. It has been suggested that U2B0 may not be required for the splicing reaction itself but may have a role in U2 snRNP biogenesis. Deletion analysis of the U2B0 gene fusion has identified the N-terminal RNP-80 motif as sufficient for localization to the coiled body and the nucleus.	U2B''	0.385171331331418	0.000388806447300981
AT2G30350	Excinuclease ABC, C subunit, N-terminal;(source:Araport11)	HIGLE	1.1622889018803	4.90662596028414e-06
AT2G30360	Encodes a SOS2-like protein kinase that is a member of the CBL-interacting protein kinase family.Loss of function mutants show a decrease in sensitivity to high pH.Phosphorylates AHA2, a plasma membrane H+ ATPase.This phosphorylation appears to regulate the activity of the proton transporter.	CIPK11,PKS5,SIP4,SNRK3.22	0.73320446431663	3.80443054534755e-08
AT2G30370	Encodes a small, potentially secreted protein that acts as an inhibitor of stomatal production though likely not through direct interaction with the TMM receptor. It is homologous to known stomatal regulators EPF1 and EPF2. Memmber of the EPF/EPFL (epidermal patterning factor/EPF-like) gene family, which genes encode plant-specific secretory peptides, several of which play a role in controlling s…	AtEPFL6,CHAL,EPFL6	2.63092499673531	0.0057683626433596
AT2G30440	Encodes a thylakoidal processing peptidase that removes signal sequences from proteins synthesized in the cytoplasm and transported into the thylakoid lumen. The mRNA is cell-to-cell mobile.	Plsp2B,TPP	0.639485221009215	7.58789803123168e-14
AT2G30505	Late embryogenesis abundant (LEA) hydroxyproline-rich glycoprotein family;(source:Araport11)	NA	1.13131881130531	0.00104622689640512
AT2G30550	Encodes a lipase that hydrolyzes phosphatidylcholine, glycolipids as well as triacylglycerols.	DALL3	0.365868160687859	0.00109532624798603
AT2G30600	BTB/POZ domain-containing protein;(source:Araport11)	NA	0.773671244632767	9.61291910094538e-17
AT2G30620	winged-helix DNA-binding transcription factor family protein;(source:Araport11)	H1.2	0.347241907829318	3.17805186914451e-05
AT2G30710	Ypt/Rab-GAP domain of gyp1p superfamily protein;(source:Araport11)	NA	0.286130565511998	0.00747321904974497
AT2G30740	Protein kinase superfamily protein;(source:Araport11)	NA	0.673863032813909	4.32220392661968e-12
AT2G30840	encodes a protein whose sequence is similar to 2-oxoglutarate-dependent dioxygenase	NA	0.909771298022181	0.000266441865311736
AT2G30910	actin-related protein C1A;(source:Araport11)	ARPC1,ARPC1A	0.398980932321815	0.0102223001273306
AT2G30930	hypothetical protein;(source:Araport11)	NA	1.5308825924629	2.05276320253204e-36
AT2G30980	Encodes a GSK3-like protein kinase. This protein can interact with the BZR1 protein involved in brassinosteroid-mediated signaling in a Y2H assay and promotes BZR1 phosphorylation in protoplasts.	ASKdZeta,ATSK2-2,ATSK23,BIL1,SKdZeta	0.184643324623281	0.024618894031525
AT2G31020	OSBP(oxysterol binding protein)-related protein 1A;(source:Araport11)	ORP1A	0.614553137196663	0.00080949469483531
AT2G31082	Member of a large family of putative ligands homologous to the Clavata3 gene. Consists of a single exon.	CLE7	1.53119277001605	0.0170153475447341
AT2G31085	Member of a large family of putative ligands homologous to the Clavata3 gene. Consists of a single exon. Can replace CLV3 function in vivo.	AtCLE6,CLE6	2.69073524349785	0.0430633594445271
AT2G31110	Encodes a member of the TBL (TRICHOME BIREFRINGENCE-LIKE) gene family containing a plant-specific DUF231 (domain of unknown function) domain. TBL gene family has 46 members, two of which (TBR/AT5G06700 and TBL3/AT5G01360) have been shown to be involved in the synthesis and deposition of secondary wall cellulose, presumably by influencing the esterification state of pectic polymers. A nomenclature…	TBL40	1.19069737525545	3.19280031171728e-09
AT2G31141	hypothetical protein;(source:Araport11)	NA	0.610765779436773	0.0053483500674898
AT2G31150	ATP binding / ATPase;(source:Araport11)	NA	0.577750311304851	0.000891149560909286
AT2G31350	Encodes a mitochondrial glyoxalase 2 that can accommodate a number of different metal centers and with the predominant metal center being Fe(III)Zn(II).	GLX2-5	0.533348800170461	2.27551003016442e-07
AT2G31440	Encodes a gamma-secretase subunit. Associates with other subunits in intracellular membrane compartments.	APH-1	0.57637373238821	4.4792166835831e-07
AT2G31490	neuronal acetylcholine receptor subunit alpha-5;(source:Araport11)	NA	0.28822834757811	0.0330171323409331
AT2G31510	IBR domain-containing protein;(source:Araport11)	ARI7,ATARI7	0.194246458978815	0.0271888647657668
AT2G31585	other_RNA;(source:Araport11)	NA	0.570770874542173	0.000361062929983515
AT2G31600	INO80 complex subunit D-like protein;(source:Araport11)	NA	0.695610991008123	0.0317644387795621
AT2G31730	basic helix-loop-helix (bHLH) DNA-binding superfamily protein;(source:Araport11)	NA	1.18612499221003	1.29951741043988e-09
AT2G31800	Integrin-linked protein kinase family;(source:Araport11)	NA	0.881301105845249	1.00503155242365e-19
AT2G31810	ACT domain-containing small subunit of acetolactate synthase protein;(source:Araport11)	AHASS1,AIP1	1.27685872676365	6.84419578139813e-60
AT2G31880	Encodes a putative leucine rich repeat transmembrane protein that is expressed in response to Pseudomonas syringae. Expression of SRRLK may be required for silencing via lsiRNAs. Regulates cell death and innate immunity.	EVR,SOBIR1	0.219856566062113	0.0246514277477765
AT2G31900	Encodes an novel myosin isoform.	ATMYO5,ATXIF,XIF	1.09741574860468	9.86242723110606e-16
AT2G31902	Natural antisense transcript overlaps with AT2G31900;(source:Araport11)	NA	1.05260378067411	4.53699675967767e-10
AT2G31980	PHYTOCYSTATIN 2;(source:Araport11)	AtCYS2,CYS2	3.25292331964416	2.79515901113297e-51
AT2G32080	similar to the conserved animal nuclear protein PUR alpha which was implicated in the control of gene transcription and DNA replication	PUR_ALPHA-1	0.370707632766599	1.57306254160713e-05
AT2G32090	Lactoylglutathione lyase / glyoxalase I family protein;(source:Araport11)	GLXI-like9	0.609011969998623	0.000466783423886744
AT2G32150	Haloacid dehalogenase-like hydrolase (HAD) superfamily protein;(source:Araport11)	NA	1.56544318623246	1.24345338375327e-57
AT2G32240	PAMP induced protein involved in defense response. Interaction with UBAC2 proteins in the ER, is necessary for PAMP mediated accumulation of the callose synthase PMR4.	PICC	0.295176997990508	0.00124439400768473
AT2G32260	phosphorylcholine cytidylyltransferase;(source:Araport11)	ATCCT1,CCT1	0.368312536029754	0.00307293259569802
AT2G32280	Encodes a member of a plant-specific gene family that is required for embryo provasculature development. The gene product regulates vascular network complexity and connectivity in cotyledons.	VCC	0.845608104253507	0.000138217004896565
AT2G32430	Galactosyltransferase family protein;(source:Araport11)	NA	1.42115447999192	5.58257196673547e-17
AT2G32460	Member of the R2R3 factor gene family.	ABS7,ATM1,ATMYB101,MYB101	0.790522999238219	0.0236597029680014
AT2G32520	alpha/beta-Hydrolases superfamily protein;(source:Araport11)	NA	0.76230325732308	8.31435480891297e-16
AT2G32580	transmembrane protein, putative (DUF1068);(source:Araport11)	NA	0.251382230218271	0.0258441408174565
AT2G32600	hydroxyproline-rich glycoprotein family protein;(source:Araport11)	NA	0.271361857197114	0.0151933676409943
AT2G32660	receptor like protein 22;(source:Araport11)	AtRLP22,RLP22	0.785897309420633	0.00127146765455661
AT2G32700	Encodes a WD40 repeat and LUFS domain containing protein that is similar to LUG. Interacts physically with SEUSS and likely functions as part of a repressor complex that represses AG. Involved in cell wall modifications necessary for mucilage extrusion and mediates aluminium sensitivity through PECTIN METHYLESTERASE46-modulated root cell wall pectin methylesterification.	LUH,MUM1	0.27631091114721	0.000108703568904734
AT2G32710	Kip-related protein (KRP) gene, encodes CDK (cyclin-dependent kinase) inhibitor (CKI). A member of seven KRP genes found in Arabidopsis thaliana. Negative regulator of cell division. Expressed in actively dividing cells.	ACK2,ICK7,KRP4	0.630257095081732	8.54244402687033e-06
AT2G32860	beta glucosidase 33;(source:Araport11)	BGLU33	0.925656669956251	0.000175592703235122
AT2G32880	TRAF-like family protein;(source:Araport11)	NA	0.900440776237666	0.00705835396493622
AT2G32900	Homologous to Drosophila ZW10, a centromere/kinetochore protein involved in chromosome segregation. Member of MAG2 complex on the ER that is responsible for efficient transport of seed storage proteins, functions in protein transport between the ER and Golgi apparatus, contain a Zeste?White 10 (ZW10) domain and a Sec39 domain. Required for proper maturation of seed storage proteins.	ATZW10,MIP1	0.423818783440809	6.25283521429987e-06
AT2G33020	receptor like protein 24;(source:Araport11)	AtRLP24,RLP24	1.90113602300984	0.00857859395648184
AT2G33051	Natural antisense transcript overlaps with AT2G33050;(source:Araport11)	NA	0.691573057283816	0.00070299212425973
AT2G33150	Encodes an organellar (peroxisome, glyoxysome) 3-ketoacyl-CoA thiolase, involved in fatty acid b-oxidation during germination and subsequent seedling growth. Mutants have defects in glyoxysomal fatty acid beta-oxidation. EC2.3.1.16 thiolase.	KAT2,PED1,PKT3	0.586916852470481	1.11569779088186e-22
AT2G33205	Serinc-domain containing serine and sphingolipid biosynthesis protein;(source:Araport11)	NA	1.06855207375687	0.0400947617967018
AT2G33220	GRIM-19 protein;(source:Araport11)	NA	0.461862288322536	0.00544439331595026
AT2G33310	Auxin induced gene, IAA13 (IAA13).	IAA13	1.03740332930136	2.11182289238381e-18
AT2G33340	Encodes MAC3B, a U-box proteins with homology to the yeast and human E3 ubiquitin ligase Prp19. Associated with the MOS4-Associated Complex (MAC). Involved in plant innate immunity. Regulator of flowering time.	MAC3B	0.629515806130149	4.78349437963136e-16
AT2G33410	Belongs to a member of the RNA-binding glycine-rich (RBG) gene superfamily. The mRNA is cell-to-cell mobile.	RBGD2	0.474252050861638	9.34761771374637e-06
AT2G33480	NAC domain containing protein 41;(source:Araport11)	ANAC041,NAC041	0.960090784726448	0.00101140305336607
AT2G33500	B-box type zinc finger protein with CCT domain-containing protein;(source:Araport11)	BBX12	1.04608897706232	2.8171003373185e-09
AT2G33630	NAD(P)-binding Rossmann-fold superfamily protein;(source:Araport11)	NA	0.43891997472019	2.77455993647389e-06
AT2G33740	encodes a copper binding protein that forms tetramers in vitro. Gene is expressed in all tissues examined and protein is localized to the chloroplast. The mRNA is cell-to-cell mobile.	CUTA	0.501505031204311	0.00226435772801072
AT2G33770	Encodes a ubiquitin-conjugating E2 enzyme. UBC24 mRNA accumulation is suppressed by miR399f, miR399b and miR399c. Involved in phosphate starvation response and mediates degradation of PHO1 and PHT1s at endomembrane. Its expression is responsive to phosphate (Pi) and not phosphite (Phi) in roots and shoots. The mRNA is cell-to-cell mobile.	ATUBC24,PHO2,UBC24	0.354476764445311	8.90554290501161e-07
AT2G33820	encodes a mitochondrial ornithine transporter which exports ornithine from the mitochondrion to the cytosol	ATMBAC1,BAC1,MBAC1	0.824460536507091	0.019413246846692
AT2G33830	Negative regulator of local and systemic acquired resistance; target of FLD for activation of SAR.	AtDRM2,DRM2	2.51270068444153	1.44955865676678e-136
AT2G34000	RING/U-box superfamily protein;(source:Araport11)	NA	1.68012974341564	0.00344898288386552
AT2G34020	Calcium-binding EF-hand family protein;(source:Araport11)	NA	4.30002865879513	6.67284485825429e-223
AT2G34080	Cysteine proteinases superfamily protein;(source:Araport11)	NA	1.71612023224188	8.37000120897026e-07
AT2G34140	CDF4 is member of the group II DOF transcription factor family is involved in regulation of differentiation root columella cells. It is a direct target of the transcriptional repressor WOX5. CDF4 itself is a transcriptional repressor that appears to repress root columella stem cell identity. Ectopic expression of CDF leads to premature differentiation of root columella cells.	CDF4	0.878893971334935	0.0337481828428191
AT2G34150	Encodes a member of the SCAR family.These proteins are part of a complex (WAVE) complex.The SCAR subunit activates the ARP2/3 complex which in turn act as a nucleator for actin filaments.	ATRANGAP2,ATSCAR1,SCAR1,WAVE1	0.409428188144226	0.00953728741458097
AT2G34190	Xanthine/uracil permease family protein;(source:Araport11)	NA	0.853810463826807	1.36259661531382e-10
AT2G34300	S-adenosyl-L-methionine-dependent methyltransferases superfamily protein;(source:Araport11)	NA	0.942811051463767	4.34267668543377e-24
AT2G34315	avirulence induced family protein;(source:Araport11)	NA	5.01042316341575	0.00313492710107198
AT2G34390	aquaporin NIP2.1	NIP21,NLM4	1.38882456719753	0.014418534300723
AT2G34470	Encodes a urease accessory protein which is essential for the activation of plant urease.	PSKF109,UREG	0.456184146238185	2.23623828045131e-05
AT2G34585	transmembrane protein;(source:Araport11)	NA	0.575145258558362	3.38486327844047e-09
AT2G34590	Transketolase family protein;(source:Araport11)	NA	0.813734883344813	3.1654585373266e-24
AT2G34650	Encodes a protein serine/threonine kinase that may act as a positive regulator of cellular auxin efflux, as a a binary switch for PIN polarity, and as a negative regulator of auxin signaling. Recessive mutants exhibit similar phenotypes as pin-formed mutants in flowers and inflorescence but distinct phenotypes in cotyledons and leaves. Expressed in the vascular tissue proximal to root and shoot m…	ABR,PID	0.677773446825398	1.72356921579567e-05
AT2G34680	isolated from differential screening of a cDNA library from auxin-treated root culture. sequence does not show homology to any known proteins and is predicted to be extracellular.	AIR9	0.170612702192245	0.0199003636410479
AT2G34690	Gene product transports the glycolipid precursor sphingosine between membranes in vitro. Mutant constitutively expresses defense-related genes that accompany the hypersensitive response normally triggered by avirulent pathogens. The mRNA is cell-to-cell mobile.	ACD11	1.28405489668663	9.30136508382959e-34
AT2G34730	myosin heavy chain-like protein;(source:Araport11)	NA	0.587612370904515	2.07976950791374e-05
AT2G34750	RNA polymerase I specific transcription initiation factor RRN3 protein;(source:Araport11)	NA	0.403988976661717	2.53519849853102e-07
AT2G34900	Encodes a member of the BET subgroup of bromodomain proteins, a novel class of putative transcription factors. Its expression is induced during seed imbibition and downregulated during germination. Seeds of a loss-of-function mutant allele, imb1, show impaired cotyledon greening during germination in abscisic acid (ABA) and express higher levels of ABI5 protein than the wild type. Moreover, imb1 …	GTE01,GTE1,IMB1	0.93733157289795	8.80226433636653e-06
AT2G34920	RING/U-box superfamily protein;(source:Araport11)	EDA18	0.54770423096708	0.0321698399138088
AT2G34930	disease resistance family protein / LRR family protein;(source:Araport11)	NA	0.737268042325229	0.00292370885295263
AT2G35020	Encodes a protein that functions as an N-acetylglucosamine-1-phosphate uridylyltransferase that catalyzes the formation of UDP-N-acetylglucosamine (UDP-GlcNAc). This is an essential precursor for glycolipid and glycoprotein synthesis and is also used for regulatory protein modification in signaling pathways. The enzyme can also catalyze the reverse reaction using both UDP-GlcNAc and the less comm…	GLCNA.UT2,GlcNAc1pUT2	0.901444576702719	9.58068798719659e-14
AT2G35050	kinase superfamily with octicosapeptide/Phox/Bem1p domain-containing protein;(source:Araport11)	NA	0.427873082542884	4.2290412992991e-11
AT2G35140	DCD (Development and Cell Death) domain protein;(source:Araport11)	NA	1.43303373119585	9.26707007100135e-13
AT2G35150	Encodes EXORDIUM LIKE 7.	EXL7	1.55788065980215	0.000734568886192331
AT2G35160	Encodes SU(var)3-9 homologue 5 (SUVH5). SUVH5 has histone methyltransferase (MTase) activity in vitro and contributes to the maintenance of H3 mK9 (methylation of histone H3 at Lys-9) and CMT3-mediated non-CG methylation in vivo. This is a member of a subfamily of SET proteins that shares a conserved SRA domain.	SGD9,SUVH5	0.794634086483482	0.00348081464663611
AT2G35170	Histone H3 K4-specific methyltransferase SET7/9 family protein;(source:Araport11)	NA	1.81161183593592	6.58010842394643e-37
AT2G35190	plant-specific SNARE located in cell plate of dividing cells. cofractionates with the cytokinesis-specific syntaxin, KNOLLE, which is required for the formation of the cell plate.	ATNPSN11,NPSN11,NSPN11	0.447312573481711	0.00266784674443597
AT2G35210	A member of ARF GAP domain (AGD), A thaliana has 15 members, grouped into four classes.	AGD10,MEE28,RPA	0.87158824596505	0.00554698230803382
AT2G35230	Contains a plant-specific VQ motif. Involved in endosperm growth and seed size determination. IKU1 is expressed in the early endosperm and its progenitor, the central cell.IKU1 interacts with MINI3 in the yeast two-hybrid system.	IKU1	0.311744226391626	0.00399075792010275
AT2G35240	Member of MORF family consisting of of nine full-length proteins encoded in the nuclear genome. MORF proteins are required for all RNA editing events in plastids and for many, possibly also all, sites in mitochondria. Potential link between the RNA binding PPR protein and the protein contributing the enzymatic activity in RNA editing.	MORF6	0.340126337957314	0.0105930306014735
AT2G35270	Direct target of AGAMOUS. Regulates patterning and differentiation of reproductive organs.	AHL21,GIK	1.25473273596061	1.00150778790591e-07
AT2G35320	homologue of the animal Eyes Absent genes. encodes a tyrosine-specific phosphatase. the protein sequence lacks the cys-containing signature of the classical tyrosine phosphatases. belongs to the aspartate-based phosphatases. The enzyme activity is strictly metal-dependent.	ATEYA,EYA	0.479548641806703	0.00347117514031598
AT2G35450	catalytic/ hydrolase;(source:Araport11)	NA	0.37797451896027	0.0115018495816472
AT2G35610	Encodes an arabinosyltransferase that modifies extensin proteins in root hair cells.	XEG113	0.427242748613671	6.01456939418608e-05
AT2G35635	encodes a ubiquitin-like protein that contains tandem repeats of the ubiquitin coding region, but at least one repeat per gene encodes a protein with amino acid substitutions. The mRNA is cell-to-cell mobile.	RUB2,UBQ7	0.358436821768004	0.0145038047101783
AT2G35680	Encodes a phosphatidylglycerophosphate (PGP) phosphatase involved in the synthesis of plastidial Phosphatidylglycerol (PG) in conjunction with PGPP1 and PTPMT2 in root. PTPMT1 levels were higher in node, cauline leaf, and flower than in root, leaf, and stem.	PTPMT1	0.513738813423773	3.72248879088033e-11
AT2G35710	Nucleotide-diphospho-sugar transferases superfamily protein;(source:Araport11)	PGSIP7	0.922885459885961	7.36410963970071e-06
AT2G35750	transmembrane protein;(source:Araport11)	NA	0.490349303601848	0.00031621324846526
AT2G35760	Uncharacterized protein family (UPF0497);(source:Araport11)	CASPL2B2	0.550250612233831	0.0443700890514199
AT2G35780	serine carboxypeptidase-like 26;(source:Araport11)	scpl26	0.516254924618113	1.85485429998844e-11
AT2G35820	ureidoglycolate hydrolase;(source:Araport11)	NA	1.61342251188042	5.89781203003906e-21
AT2G35880	Microtubule-stabilizing protein.	NA	1.28689051428756	1.66887261978601e-32
AT2G35910	RING/U-box superfamily protein;(source:Araport11)	NA	0.645120565559808	0.0399830363658303
AT2G35945	Natural antisense transcript overlaps with AT2G35940;(source:Araport11)	NA	0.682845661552618	0.00874792583828148
AT2G36050	ovate family protein 15;(source:Araport11)	ATOFP15,OFP15	0.436499925761934	0.014673462421365
AT2G36060	MMZ3/UEV1C encodes a protein that may play a role in DNA damage responses and error-free post-replicative DNA repair by participating in lysine-63-based polyubiquitination reactions. UEV1C can form diubiquitin and triubiquitin chains in combination with UBC13A/UBC35 in vitro. It can also functionally complement an mms2 mutation in budding yeast, both by increasing mms2 mutant viability in the pre…	MMZ3,UEV1C	0.486629059315395	4.45955423434804e-07
AT2G36220	hypothetical protein;(source:Araport11)	NA	0.300360576559611	0.0285351487675659
AT2G36270	Encodes a member of the basic leucine zipper transcription factor family, involved in ABA signalling during seed maturation and germination. The Arabidopsis abscisic acid (ABA)-insensitive abi5 mutants have pleiotropic defects in ABA response, including decreased sensitivity to ABA inhibition of germination and altered expression of some ABA-regulated genes. Comparison of seed and ABA-inducible v…	ABI5,AtABI5,DPBF1,GIA1	1.25151812934076	8.15482499523116e-05
AT2G36320	A20/AN1-like zinc finger family protein;(source:Araport11)	NA	1.55935836475363	1.67662450409008e-74
AT2G36330	Uncharacterized protein family (UPF0497);(source:Araport11)	CASPL4A3	0.374435992489615	0.0409111064705516
AT2G36350	Member of AGC VIIIa Kinase gene family.	AGC1-9	0.221643374930846	0.0288193843151506
AT2G36360	Galactose oxidase/kelch repeat superfamily protein;(source:Araport11)	NA	0.337478120583617	0.00957151568830572
AT2G36410	transcriptional activator (DUF662);(source:Araport11)	NA	0.347727298237487	0.00937451200235474
AT2G36420	nucleolin-like protein;(source:Araport11)	TRM27	0.745104144149769	1.36351410528371e-08
AT2G36430	transmembrane protein, putative (DUF247);(source:Araport11)	NA	0.857541720224379	0.000404689820275515
AT2G36570	Leucine-rich repeat protein kinase family protein;(source:Araport11)	PXC1	0.937594354276479	2.99160837711356e-10
AT2G36670	Eukaryotic aspartyl protease family protein;(source:Araport11)	NA	0.357758957483243	0.00667035419763991
AT2G36690	Protein belonging to the Fe-dependent 2-oxoglutarate dioxygenase superfamily, catalyzes the stereospecific hydration of GA12 to produce DHGA12, negatively regulates ABA sensitivity during germination, phototrophic establishment and seedling development.	GIM2	0.873408739962249	0.00216917754558369
AT2G36720	Acyl-CoA N-acyltransferase with RING/FYVE/PHD-type zinc finger domain-containing protein;(source:Araport11)	NA	0.206888464342632	0.0353422258616399
AT2G36830	Encodes a tonoplast intrinsic protein, which functions as water channel. It has also been shown to be able to facilitate the transport of urea and hydrogen peroxide. Highly expressed in vascular tissues of the root, stem, cauline leaves and flowers but not in the apical meristems. The mRNA is cell-to-cell mobile.	GAMMA-TIP,GAMMA-TIP1,TIP11	0.297314409921353	0.000839678344859941
AT2G36890	Putative homolog of the Blind gene in tomato. Together with RAX1 and RAX3 belong to the class R2R3 MYB genes; encoded by the Myb-like transcription factor MYB38, regulates axillary meristem formation. The mRNA is cell-to-cell mobile.	ATMYB38,BIT1,MYB38,RAX2	0.661449976915131	0.0050521555593282
AT2G36900	member of Membrin Gene Family	ATMEMB11,MEMB11	1.3506749966085	1.03618754153142e-25
AT2G36930	zinc finger (C2H2 type) family protein;(source:Araport11)	NA	0.902419362213108	3.39231484936566e-13
AT2G37025	TRF-like 8;(source:Araport11)	TRFL8	2.68642289324361	5.03043959712598e-35
AT2G37035	transmembrane protein;(source:Araport11)	NA	0.370878419877086	0.000456505129803404
AT2G37050	Leucine-rich repeat protein kinase family protein;(source:Araport11)	NA	0.232103607622358	0.0070776704640058
AT2G37110	PLAC8 family protein;(source:Araport11)	NA	0.211252505435578	0.0187730016012883
AT2G37120	S1FA-like DNA-binding protein;(source:Araport11)	NA	0.49137267753459	0.0186177695739269
AT2G37130	Peroxidase superfamily protein;(source:Araport11)	NA	0.944326888434445	2.54098092248175e-16
AT2G37170	a member of the plasma membrane intrinsic protein subfamily PIP2. localizes to the plasma membrane and exhibits water transport activity in Xenopus oocyte. expressed specifically in the vascular bundles and protein level increases slightly during leaf dev	PIP22,PIP2B	0.550503086136448	8.14828686639152e-11
AT2G37190	Ribosomal protein L11 family protein;(source:Araport11)	NA	0.292463766845005	0.0396527154972274
AT2G37200	Uncharacterized protein family (UPF0497);(source:Araport11)	CASPL5A1	1.31777608489891	4.08890142039638e-28
AT2G37270	One of two genes encoding the ribosomal protein S5. Expressed at a lower level compared to ATRPS5A.	ATRPS5B,RPS5B	0.325213695261783	0.000149808309616096
AT2G37280	Encodes an ATP-binding cassette (ABC) transporter. Expressed in the vascular tissue of primary stem.	ABCG33,ATPDR5,PDR5	1.04259648350554	1.28614165925235e-13
AT2G37330	Encodes an ABC transporter-like protein, without an ATPase domain, required for aluminum (Al) resistance/tolerance and may function to redistribute accumulated Al away from sensitive tissues in order to protect the growing root from the toxic effects of Al.	ALS3	2.49352498527277	1.28055293006608e-28
AT2G37340	encodes an RS-containing Zinc knuckle protein with molecular mass of 33kDa that is localized to nuclear specks. Barta et al (2010) have proposed a nomenclature for Serine/Arginine-Rich Protein Splicing Factors (SR proteins): Plant Cell. 2010, 22:2926.	AT-RS2Z33,ATRSZ33,RS2Z33,RSZ33	0.328359555298263	0.00244729227339125
AT2G37410	Mitochondrial inner membrane translocase. Together with AtTIM17-1, TIM17-2 has a long C-terminal extension not present in other TIMs. The extension is located in the outer membrane and so TIM17-2 links the inner and outer mitochondrial membranes. The C-terminal region is essential for protein import into mitochondria via the general import pathway but is not necessary for import via the carrier p…	ATTIM17-2,TIM17,TIM17-2	0.779749458867525	1.46681777228007e-20
AT2G37480	hypothetical protein;(source:Araport11)	NA	0.92409736209228	1.23149740311168e-39
AT2G37550	A member of ARF GAP domain (AGD), A thaliana has 15 members, grouped into four classes.	AGD7,ASP1	0.366099836882645	0.000349692048562345
AT2G37620	Member of the actin gene family. Expressed in mature pollen.	AAc1,ACT1	0.661902269203511	5.30263672657126e-12
AT2G37630	Encodes a MYB-domain protein involved in specification of the leaf proximodistal axis. Mutation results in lobed and dissected leaves with a characteristic asymmetry. Homologous to the Antirrhinum PHANTASTICA (PHAN) and maize ROUGH SHEATH2 (RS2) genes Asymmetric placement of auxin response at the distal leaf tip precedes visible asymmetric leaf growth. Acts alongside AXR1 to exclude BP expression…	AS1,ATMYB91,ATPHAN,MYB91	0.437616312945759	1.94193949092621e-05
AT2G37640	member of Alpha-Expansin Gene Family. Naming convention from the Expansin Working Group (Kende et al, 2004. Plant Mol Bio). Involved in the formation of nematode-induced syncytia in roots of Arabidopsis thaliana.	ATEXP3,ATEXPA3,ATHEXP_ALPHA_1.9,EXP3,EXPA3	1.45771286064702	9.85755079214175e-29
AT2G37650	GRAS family transcription factor;(source:Araport11)	NA	0.990088177662403	2.69539876956065e-06
AT2G37670	Transducin/WD40 repeat-like superfamily protein;(source:Araport11)	NA	2.00171663654377	9.56252919147824e-32
AT2G37678	Positive regulator of photomorphogenesis in far-red light. Most abundant in young seedlings in the dark. Downregulated in the light and older as plants develop. Localized in the nucleus and the cytoplasm. Nuclear localization strongest in the dark. Degraded through the 26S proteasome. Regulated by PHYA. It is specifically required for the light-regulated nuclear accumulation of phyA ( but not phy…	FHY1,FRY1,PAT3	2.51841021640301	1.31498139559218e-31
AT2G37710	Induced in response to Salicylic acid. The mRNA is cell-to-cell mobile.	LecRK-IV.1,RLK	0.536257459815483	1.0045564830514e-06
AT2G37750	hypothetical protein;(source:Araport11)	NA	1.1710976129496	8.42490311521146e-23
AT2G37820	Cysteine/Histidine-rich C1 domain family protein;(source:Araport11)	NA	1.02392699150597	0.00752005267700219
AT2G37840	Protein kinase superfamily protein;(source:Araport11)	NA	0.52116525178117	5.09712480205498e-09
AT2G37925	encodes a member of copper transporter family and functionally complements a high affinity copper transporter mutant in yeast	COPT4	0.877474729835932	0.0133240262417849
AT2G37930	hypothetical protein (DUF3527);(source:Araport11)	NA	1.78800643502179	1.89931982838173e-26
AT2G37940	Inositol phosphorylceramide synthase 2;(source:Araport11)	AtIPCS2,ERH1	0.406744134036255	3.98624506124857e-05
AT2G38000	chaperone protein dnaJ-like protein;(source:Araport11)	NA	0.757202581530674	6.83107978853504e-10
AT2G38020	necessary for proper vacuole formation and morphogenesis in Arabidopsis	EMB258,MAN,VCL1,VPS16	0.31324579948322	0.000151539005798894
AT2G38050	Similar to mammalian steroid-5-alpha-reductase. Involved in the brassinolide biosynthetic pathway.	ATDET2,DET2,DWF6	0.354976707767876	0.00696118743043654
AT2G38070	OPL2 is a homolog of OPS and also shares overlapping expression and functions. opl2/ops double mutants have more severe delay in protophloem development and additionally defects in metaphloem sieve tube development. OPL2 can functionally compensate for lack of OPS when its expression is driven by the OPS promoter.	OPL2	0.872153106849997	0.0171329950723302
AT2G38090	Duplicated homeodomain-like superfamily protein;(source:Araport11)	NA	0.800908661575341	1.68911331473023e-05
AT2G38120	Encodes an auxin influx transporter. AUX1 resides at the apical plasma membrane of protophloem cells and at highly dynamic subpopulations of Golgi apparatus and endosomes in all cell types. AUX1 action in the lateral root cap and/or epidermal cells influences lateral root initiation and positioning. Shoot supplied ammonium targets AUX1 and inhibits lateral root emergence. The mRNA is cell-to-cell…	AtAUX1,AUX1,MAP1,PIR1,WAV5	0.802263652051717	7.15985935401379e-23
AT2G38390	Peroxidase superfamily protein;(source:Araport11)	NA	0.44421458899481	0.0261489009110099
AT2G38400	alanine:glyoxylate aminotransferase 2 homolog (AGT3) mRNA,	AGT3	1.34502568333305	1.31147676329953e-50
AT2G38410	Encodes a member of the Arabidopsis TOL (TOM1-LIKE) family of ubiquitin binding proteins that acts redundantly in the recognition and further endocytic sorting of a PIN-FORMED (PIN)-type auxin carrier protein at the plasma membrane, modulating dynamic auxin distribution and associated growth responses.	NA	0.216748248607292	0.0151941377905155
AT2G38500	2-oxoglutarate (2OG) and Fe(II)-dependent oxygenase superfamily protein;(source:Araport11)	NA	1.15187500638159	0.000524888495501089
AT2G38530	Involved in lipid transfer between membranes and plays a role in maintaining the integrity of the cuticle-cell wall interface. Belongs to a family of Lipid transfer proteins. Sequence similarity to other plant/Arabidopsis LPT genes but highest similarity to LPT1. Stress and pathogen-inducible motifs found in the upstream region. Expressed in flower, leaves and siliques but absent in roots. Predic…	AtLtpI-5,cdf3,LP2,LTP2	1.92396675100246	6.94000714551158e-58
AT2G38695	Gag-Pol polyprotein/retrotransposon;(source:Araport11)	NA	0.680497008335652	0.0482469793820494
AT2G38700	Encodes mevalonate diphosphate decarboxylase, the enzyme that catalyzes the synthesis of isopentenyl diphosphate, used in sterol and isoprenoid biosynthesis. The protein appears to form a homodimeric complex. Incidentally, it was shown that the Arabidopsis MVD protein could also interact with its yeast homolog to form a heterodimer.	AtMDD1,ATMVD1,MDD1,MVD1	0.442660715575768	2.24705625135259e-06
AT2G38800	Plant calmodulin-binding protein-like protein;(source:Araport11)	NA	0.3622249209761	4.64814223769995e-06
AT2G38820	DNA-directed RNA polymerase subunit beta-beta protein, putative (DUF506);(source:Araport11)	NA	0.6069089094087	0.000110736151871325
AT2G38940	Encodes Pht1;4, a member of the Pht1 family of phosphate transporters which include: Pht1;1/At5g43350, Pht1;2/At5g43370, Pht1;3/At5g43360, Pht1;4/At2g38940, Pht1;5/At2g32830, Pht1;6/At5g43340, Pht1;7/At3g54700, Pht1;8/At1g20860, Pht1;9/At1g76430 (Plant Journal 2002, 31:341). Expression is upregulated in the shoot of cax1/cax3 mutant and is responsive to phosphate (Pi) and not phosphite (Phi) in r…	ATPT2,PHT14	1.19135892710473	2.79646349281062e-16
AT2G39000	Encodes a chloroplast localized n-acetyltransfefase involved in N-terminal protein amino acid acetylation.	AtNAA70	0.274743591344476	0.0368512465209839
AT2G39040	Peroxidase superfamily protein;(source:Araport11)	NA	1.04732661783941	5.09274009222659e-06
AT2G39100	RING/U-box superfamily protein;(source:Araport11)	NA	0.68320936564159	0.00215244630491543
AT2G39130	Transmembrane amino acid transporter family protein;(source:Araport11)	NA	0.595997581213076	5.78869655245498e-13
AT2G39180	CRINKLY4 related 2;(source:Araport11)	ATCRR2,CCR2	1.04485779721327	3.07224255017515e-12
AT2G39210	Major facilitator superfamily transmembrane transporter responsible for the uptake of picolinate herbicides.	NA	1.07970528450388	4.08459944111768e-25
AT2G39280	Ypt/Rab-GAP domain of gyp1p superfamily protein;(source:Araport11)	NA	0.450709037345099	0.000143084360840806
AT2G39310	jacalin-related lectin 22;(source:Araport11)	JAL22	0.283567200937763	0.023222628221277
AT2G39340	Putative mRNA export factor that is highly co-expressed with PRP4KA.	AtSAC3A,SAC3A	0.223089807058864	0.0159188594348994
AT2G39350	Belongs to a clade of five Arabidopsis thaliana ABCG half-transporters that are required for synthesis of an effective suberin barrier in roots and seed coats (ABCG2, ABCG6, and ABCG20) and for synthesis of an intact pollen wall (ABCG1 and ABCG16).	ABCG1,WBC1	1.09963485727973	3.35727941584999e-21
AT2G39360	Protein kinase superfamily protein;(source:Araport11)	CVY1	0.44571343316988	7.65072137752938e-05
AT2G39370	Encodes a member of the MAKR (MEMBRANE-ASSOCIATED KINASE REGULATOR) gene family. MAKRs have putative kinase interacting motifs and membrane localization signals. Known members include: AT5G26230 (MAKR1), AT1G64080 (MAKR2), AT2G37380 (MAKR3), AT2G39370 (MAKR4), AT5G52870 (MAKR5) and AT5G52900 (MAKR6).	MAKR4	1.0107895637725	0.000195051619203492
AT2G39375	hypothetical protein;(source:Araport11)	NA	0.947793393987596	0.000175800271094815
AT2G39400	alpha/beta-Hydrolases superfamily protein;(source:Araport11)	MAGL6	1.29914929448385	3.33914381349791e-10
AT2G39480	P-glycoprotein 6;(source:Araport11)	ABCB6,PGP6	0.316782459494811	0.000241097097904992
AT2G39570	Encodes a ACT domain-containing protein. The ACT domain, named after bacterial aspartate kinase, chorismate mutase and TyrA (prephenate dehydrogenase), is a regulatory domain that serves as an amino acid-binding site in feedback-regulated amino acid metabolic enzymes.	ACR9	0.470823360904152	4.69403754601404e-09
AT2G39580	zinc finger C3H1 domain protein;(source:Araport11)	NA	0.600712095907567	4.50021154339463e-09
AT2G39630	Encodes a putative dolichyl-phosphate &beta;-glucosyltransferase.	NA	0.28846798643945	0.0280110258372119
AT2G39700	putative expansin. Naming convention from the Expansin Working Group (Kende et al, 2004. Plant Mol Bio). Involved in the formation of nematode-induced syncytia in roots of Arabidopsis thaliana.	ATEXP4,ATEXPA4,ATHEXP_ALPHA_1.6,EXPA4,XPA4	1.11063297172352	7.69646243335626e-29
AT2G39705	ROTUNDIFOLIA like 8;(source:Araport11)	DVL11,RTFL8	2.28961340018886	8.07946173427401e-26
AT2G39750	S-adenosyl-L-methionine-dependent methyltransferases superfamily protein;(source:Araport11)	NA	0.348820263416062	0.000133373134665306
AT2G39855	plant/protein;(source:Araport11)	NA	1.80396670720484	0.000343687202244075
AT2G39900	Encodes a member of the Arabidopsis LIM proteins: a family of actin bundlers with distinct expression patterns. WLIM1, WLIM2a, and WLIM2b are widely expressed, whereas PLIM2a, PLIM2b, and PLIM2c are predominantly expressed in pollen. Regulates actin cytoskeleton organization.	WLIM2a	0.517180617397003	2.09592371089991e-05
AT2G39920	HAD superfamily, subfamily IIIB acid phosphatase;(source:Araport11)	NA	1.49814134835236	0.000533450670521997
AT2G39930	Encodes an isoamylase-type debranching enzyme. Mutations in this gene cause the loss of detectable isoamylase activity and the disruption of normal starch structure. Mutants have reduced starch content and abnormally structured amylopectins and phytoglycogens. It has been postulated that AtISA1 interacts with AtISA2 to form the Iso1 complex.	ATISA1,ISA1	0.675503994338354	2.47150453427423e-09
AT2G39940	Encodes a protein containing Leu-rich repeats and a degenerate F-box motif. Associates with AtCUL1, AtRbx1, and the Skp1-like proteins ASK1 and ASK2 to assemble SCF COI1 ubiquitin-ligase complexes in planta. A single amino acid substitution in the F-box motif of COI1 abolishes the formation of the SCF(COI1) complexes and results in loss of the JA response. Required for wound- and jasmonates-induc…	COI1	0.615629062561003	1.89393355083194e-14
AT2G39970	Encodes peroxisomal membrane protein 38 (PMP38). Mutation in this protein results in enlargement of peroxisomes. Delivers NAD+ for optimal fatty acid degradation during storage oil mobilization.	APEM3,PMP38,PXN	0.26914481878482	0.0218685278343223
AT2G39980	HXXXD-type acyl-transferase family protein;(source:Araport11)	NA	2.00024967678614	3.14955379662674e-72
AT2G39990	translation initiation factor eIF2 p47 subunit homolog	AteIF3f,EIF2,eIF3F	0.384880272216838	2.15220294893388e-06
AT2G40000	ortholog of sugar beet HS1 PRO-1 2;(source:Araport11)	ATHSPRO2,HSPRO2	1.46134882700047	6.29001766130478e-58
AT2G40010	Ribosomal protein L10 family protein;(source:Araport11)	NA	0.680464670733599	4.89807763327467e-06
AT2G40060	Encodes a clathrin that is localized to the cortical division zone and the cell plate and colocalizes with TPLATE during cell plate anchoring. The mRNA is cell-to-cell mobile.	CLC2	0.284918745921602	0.0377173780235942
AT2G40070	Encodes a microtubule-associated protein involved in cortical microtubule organization during leaf development.	BPP1	0.547480067822455	3.7528449872254e-08
AT2G40085	hypothetical protein;(source:Araport11)	NA	1.09607044055203	0.00135301740392947
AT2G40095	Alpha/beta hydrolase related protein;(source:Araport11)	NA	0.833382309314591	6.37271071479393e-07
AT2G40230	HXXXD-type acyl-transferase family protein;(source:Araport11)	NA	0.732030421401144	4.14714393488888e-10
AT2G40270	Protein kinase family protein;(source:Araport11)	NA	0.601992820988423	4.84628719002668e-05
AT2G40280	S-adenosyl-L-methionine-dependent methyltransferases superfamily protein;(source:Araport11)	NA	0.542201195778486	1.63331522859507e-06
AT2G40316	autophagy-like protein;(source:Araport11)	NA	0.548769142007571	5.17143759435869e-07
AT2G40410	Encodes a Ca(2+)-dependent nuclease that can degrade both DNA and RNA.	AtCaN2,CAN2	0.449229799007562	0.00144477922703371
AT2G40420	Encodes a putative amino acid transporter.	NA	1.0380361773507	1.21319781652335e-19
AT2G40600	appr-1-p processing enzyme family protein;(source:Araport11)	NA	0.407896664300702	0.00414147404194702
AT2G40610	member of Alpha-Expansin Gene Family. Naming convention from the Expansin Working Group (Kende et al, 2004. Plant Mol Bio). Involved in the formation of nematode-induced syncytia in roots of Arabidopsis thaliana.	ATEXP8,ATEXPA8,ATHEXP_ALPHA_1.11,EXP8,EXPA8	2.4899157174692	1.84715793012227e-68
AT2G40640	Plant U-box type E3 ubiquitin ligase (PUB).	NA	0.890216013145209	0.000126795963300168
AT2G40760	Rhodanese/Cell cycle control phosphatase superfamily protein;(source:Araport11)	NA	0.710515210559864	4.88929267026936e-07
AT2G40800	TIM domain protein. Associates with components of mitochondrial complex I and III. May be involved in biogenesis of respiratory chain components.	NA	0.424438979540051	0.000423856808407656
AT2G40815	Calcium-dependent lipid-binding (CaLB domain) family protein;(source:Araport11)	NA	0.368488120069008	0.0268183176737528
AT2G40820	stomatal closure actin-binding-like protein;(source:Araport11)	NA	0.721461581425478	1.84552925628865e-11
AT2G40940	Ethylene receptor, subfamily 1. Has histidine kinase activity.	ERS,ERS1	1.55126452226743	8.7332634098236e-89
AT2G40970	Homeodomain-like superfamily protein;(source:Araport11)	MYBC1	1.64084016903564	6.5799923384959e-41
AT2G41010	Encodes a novel calmodulin binding protein whose gene expression is induced by dehydration and ionic (salt) and non-ionic (mannitol) osmotic stress. Lines over-expressing this gene are more sensitive and anti-sense lines are more tolerant to osmotic stress, suggesting this gene may be a negative regulator of response to osmotic stress.	ATCAMBP25,CAMBP25	0.558983180825268	0.000949570542739791
AT2G41020	WW domain-containing protein;(source:Araport11)	NA	0.398108601900562	0.0350771232534369
AT2G41060	RNA-binding (RRM/RBD/RNP motifs) family protein;(source:Araport11)	NA	0.441627478972031	1.82387476324692e-05
AT2G41070	Transcription factor homologous to ABI5. Regulates AtEm1 expression by binding directly at the AtEm1 promoter. Located in the nucleus and expressed during seed maturation in the cotyledons and later in the whole embryo.	ATBZIP12,DPBF4,EEL	1.55896793107623	1.64400649635349e-13
AT2G41080	pentatricopeptide (PPR) repeat protein;(source:Araport11)	NA	0.711841955418009	0.00581708847795469
AT2G41110	Encodes a touch-inducible calmodulin that has higher affinity to kinesin-like calmodulin binding motor protein than CAM4 or CAM6. The mRNA is cell-to-cell mobile.	ATCAL5,CAM2	0.710924271835762	5.21970602860452e-06
AT2G41200	transmembrane protein;(source:Araport11)	NA	0.945867215511457	8.19977542402401e-07
AT2G41240	Encodes a member of the basic helix-loop-helix transcription factor family protein. Functions as a key regulator of iron-deficiency responses independent of the master regulator FIT. Likely regulates genes involved in the distribution of iron within the plant. Phosphatidylinositol 4-phosphate 5-kinase (PIP5K) enzyme family member.	BHLH100	4.53412222879684	0.0204874667845046
AT2G41310	Encodes an A- type response Regulator that is primarily expressed in the root and is involved in cytokinin-mediated signalling. Phosphatidylinositol 4-phosphate 5-kinase (PIP5K) enzyme family member.	ARR8,ATRR3,RR3	0.479718774101627	6.921539647122e-06
AT2G41340	NRPE5-like protein of unknown function; homologous to budding yeast RPB5	RPB5D	1.06642516907461	2.34090745454032e-05
AT2G41430	Encodes hydrophilic protein lacking Cys residues that is expressed in response to drought stress, light stress and treatment with plant-growth-promoting rhizobacteria (Paenibacillus polymyxa), possibly revealing a connection between responses to biotic and abiotic stress. Also identified as a CTC Interacting Domain (CID) protein in a yeast two hybrid screen using the PAB2 protein as bait. Contain…	CID1,ERD15,LSR1	1.05645121019297	5.01636633995729e-25
AT2G41480	Encodes a cationic cell-wall-bound peroxidase homolog that is involved in the lignification of cell walls. Regulated by COG1, involved in seed longevity.	AtPRX25,PRX25	1.19243510784411	3.25066092842732e-06
AT2G41490	UDP-GlcNAc:dolichol phosphate N-acetylglucosamine-1-phosphate transferase	GPT	0.525075024229532	4.80451658055062e-06
AT2G41500	Encodes LACHESIS (LIS), a protein with seven WD40 repeats. LIS is homologous to the yeast splicing factor PRP4 which is associated with the U4/U6 complex of the spliceosome. LIS is involved in a mechanism that prevents accessory cells from adopting gametic cell fate: lis mutant forms supernumerary egg cells.	AtPRP4,AtSAP60,EMB2776,LIS	0.250558199313103	0.0387243671480916
AT2G41530	Encodes a protein with S-formylglutathione hydrolase activity.	ATSFGH,SFGH	0.599101465275653	1.12861205993447e-10
AT2G41560	Encodes a calmodulin-regulated Ca(2+)-ATPase that improves salt tolerance in yeast. Localized to the vacuole. Lesion mimic phenotype when mutation in the gene is combined with a mutation in ACA11. Lesion mimic phenotype of double knockout can be suppressed by nutritional supplements that increase anion levels (e.g. 15 mM Nitrate, Chloride, or Phosphate).	ACA4	0.586732797295578	2.09997137180063e-12
AT2G41620	Nucleoporin interacting component (Nup93/Nic96-like) family protein;(source:Araport11)	NA	0.722690924689961	4.59239614686726e-20
AT2G41630	Encodes a transcription factor, TFIIB1, that plays important roles in pollen tube growth, guidance, and reception as well as endosperm development and is partially functionally different from AtTFIIB2 and AtTFIIB3/AtpBRP2.	AtTFIIB1,TFIIB,TFIIB1	0.311751884557494	0.00250004535473008
AT2G41710	Integrase-type DNA-binding superfamily protein;(source:Araport11)	NA	1.07805670874469	7.01534265281703e-13
AT2G41740	Encodes a protein with high homology to animal villin.	ATVLN2,VLN2	0.399845038746878	2.79423612298544e-07
AT2G41760	Controls the expression of specific defence-response genes, activates the synthesis pathway for the phytoalexin camalexin and influences basal resistance to Pseudomonas syringae pv tomato (Pst).	NTAQ1	1.59354521785053	4.89734195061779e-44
AT2G41780	hypothetical protein;(source:Araport11)	NA	0.911075450592363	7.64249815768378e-07
AT2G41830	Uncharacterized protein;(source:Araport11)	NA	0.524950159769919	4.72510292052267e-07
AT2G41840	Ribosomal protein S5 family protein;(source:Araport11)	NA	0.58406917288791	5.26368594364946e-15
AT2G41850	ADPG2.	ADPG2,PGAZAT	0.529933456029964	0.0123910463112819
AT2G41945	Encodes a novel protein found only in plants. RED1 has two isoforms RED1.1 and RED1.2. It is localized to the nucleus. Loss of function mutants are embryo lethal but can be rescued before desiccation by embryo culture.	RED1	0.448071986366897	0.00341184692747501
AT2G42010	phospholipase D (PLDbeta)	PLDBETA,PLDBETA1	1.31814276524645	8.29957997570862e-55
AT2G42040	WRC protein;(source:Araport11)	NA	0.62271467566182	0.00792020785343613
AT2G42160	Encodes a RING domain containing protein BRIZ1. BRIZ1 (At2g42160) and BRIZ2 (At2g26000) proteins form a heteromeric E3 ligase complex required for seed germination and post-germination growth.	BRIZ1	0.308598336930629	0.0104839553424396
AT2G42170	Actin family protein;(source:Araport11)	NA	1.21094186860504	1.86474801982916e-10
AT2G42210	Homologous to pea OEP16 and barley pPORA (OEP16), a member of Arabidopsis OEP16 family.	ATOEP16-3,OEP16-3	0.352294258660752	9.71144054658303e-05
AT2G42290	Leucine-rich repeat protein kinase family protein;(source:Araport11)	NA	0.766664223423142	4.80684556167591e-05
AT2G42310	ESSS subunit of NADH:ubiquinone oxidoreductase (complex I) protein;(source:Araport11)	NA	0.616645968243688	1.83390251690706e-07
AT2G42320	nucleolar protein gar2-like protein;(source:Araport11)	NA	0.916196779800611	1.21663632752013e-16
AT2G42330	Transmembrane kinase involved in auxin signaling. Phosphorylates T101 of TAA1 to inactive the transaminase and block auxin biosynthesis.	NA	0.639284382860824	3.91941925718597e-06
AT2G42400	VOZ transcription factor which acts as positive regulator of several salt-responsive genes. Functionally redundant in salt stress with VOZ1.	ATVOZ2,VOZ2	0.47751715199526	3.66459787824309e-05
AT2G42430	LOB-domain protein gene LBD16. This gene contains one auxin-responsive element (AuxRE). Regluates lateral root formation.	ASL18,LBD16	1.37921883196724	1.52544968030897e-07
AT2G42570	Encodes a member of the TBL (TRICHOME BIREFRINGENCE-LIKE) gene family containing a plant-specific DUF231 (domain of unknown function) domain. TBL gene family has 46 members, two of which (TBR/AT5G06700 and TBL3/AT5G01360) have been shown to be involved in the synthesis and deposition of secondary wall cellulose, presumably by influencing the esterification state of pectic polymers. A nomenclature…	TBL39	0.659091917694184	9.5702868250164e-10
AT2G42580	Encodes a member of the TTL family and contains a thioredoxin like domain and three tandom TPRs. Interacts physically with BRL2/VH1 and appears to play a role in brassiosteroid and auxin signaling. Belongs to one of the 36 carboxylate clamp (CC)-tetratricopeptide repeat (TPR) proteins (Prasad 2010, Pubmed ID: 20856808) with potential to interact with Hsp90/Hsp70 as co-chaperones. The TTL family i…	TTL3,VIT	0.26411732122452	0.0158654312875131
AT2G42610	LIGHT-DEPENDENT SHORT HYPOCOTYLS-like protein (DUF640);(source:Araport11)	LSH10	0.782893632453771	0.000139296091047774
AT2G42660	Homeodomain-like superfamily protein;(source:Araport11)	NA	1.80601071114258	0.0483221885469855
AT2G42700	Member of MAG2 complex on the ER that is responsible for efficient transport of seed storage proteins, functions in protein transport between the ER and Golgi apparatus Sec1 domain, involved in the development of vegetative organs. Required for proper maturation of seed storage proteins.	MIP3	0.252465095914181	0.0236321112942954
AT2G42780	transcription elongation factor B polypeptide;(source:Araport11)	NA	0.842145156726175	2.59847044016928e-08
AT2G42790	Encodes a peroxisomal citrate synthase that is expressed throughout seedling and shoot development.	CSY3	0.785708311242238	9.02596719801927e-28
AT2G42800	receptor like protein 29;(source:Araport11)	AtRLP29,RLP29	2.2183417000871	5.81569028745789e-06
AT2G42810	Encodes a phytochrome-specific type 5 serine/threonine protein phosphatase. It dephosphorylates active Pfr-phytochromes. Controls light signal flux by enhancing phytochrome stability and affinity for a signal transducer. The gene is alternately spliced. This variant is an integral membrane protein localized to the ER and nuclear envelope. Belongs to one of the 36 carboxylate clamp (CC)-tetratrico…	AtPP5,PAPP5,PP5	0.301171778752945	0.000202732117827374
AT2G42870	Encodes PHYTOCHROME RAPIDLY REGULATED1 (PAR1), an atypical basic helix-loop-helix (bHLP) protein. Closely related to PAR2 (At3g58850). Up regulated after simulated shade perception. Acts in the nucleus to control plant development and as a negative regulator of shade avoidance response. Functions as transcriptional repressor of auxin-responsive genes SAUR15 (AT4G38850) and SAUR68 (AT1G29510).	HLH1,PAR1	2.68001652295978	4.92150753979927e-46
AT2G42890	A member of mei2-like gene family, predominantly plant-based family of genes encoding RNA binding proteins with characteristic presence of a highly conserved RNA binding motif first described in the mei2 gene of the fission yeast S. pombe. In silico analyses reveal nine mei2 -like genes in A. thaliana. They were grouped into four distinct clades, based on overall sequence similarity and subfamily…	AML2,ML2	1.42871972665476	1.5810341634091e-74
AT2G42920	Pentatricopeptide repeat (PPR-like) superfamily protein;(source:Araport11)	NA	0.778026176462431	1.52276693458801e-08
AT2G42960	Protein kinase superfamily protein;(source:Araport11)	NA	0.856676880381293	4.41837875220918e-09
AT2G42990	GDSL-motif esterase/acyltransferase/lipase. Enzyme group with broad substrate specificity that may catalyze acyltransfer or hydrolase reactions with lipid and non-lipid substrates.	NA	1.78216309754131	4.36787255294202e-08
AT2G43050	Plant invertase/pectin methylesterase inhibitor superfamily;(source:Araport11)	ATPMEPCRD	1.43969311223984	6.3420345566606e-13
AT2G43060	ILI1 binding bHLH 1;(source:Araport11)	AtIBH1,IBH1	1.81993322050946	7.44090123403007e-08
AT2G43070	SIGNAL PEPTIDE PEPTIDASE-LIKE 3;(source:Araport11)	ATSPPL3,SPPL3	0.414795200112618	1.53302182633006e-05
AT2G43080	Encodes a prolyl-4 hydroxylase that can hydroxylate poly(L-proline),the collagen model peptide (Pro-Pro-Gly)10 and other proline rich peptides.	AT-P4H-1	0.72631160726593	7.09882094401512e-07
AT2G43130	encodes a protein belonging to the Rab/Ypt family of small GTPases, which are implicated in intracellular vesicular traffic.	ARA-4,ARA4,ATRAB11F,ATRABA5C,RABA5C	0.361821834587365	0.00777152237347043
AT2G43160	Involved in plant trans-Golgi network (TGN) transport.	NA	0.39007073950175	6.26255860505253e-10
AT2G43210	Ubiquitin-like superfamily protein;(source:Araport11)	NA	0.675097946569588	3.20390322718944e-09
AT2G43290	Calmodulin-like MSS3.Encodes an endomembrane localized member of the CML subfamily VII. Contains a canonical CaM domain and unique N-terminal extension that distinguishes it from other members of the subfamily.	AtCML5,MSS3	0.499709131456967	0.000784285412666033
AT2G43350	Glutathione peroxidase. Functions as both a redox transducer and a scavenger in abscisic acid and drought stress responses. Interacts with ABI2 and ABI1.	ATGPX3,GPX3,GPXL3	0.412312037865173	0.00475552557693041
AT2G43370	RNA-binding (RRM/RBD/RNP motifs) family protein;(source:Araport11)	NA	1.31386082573737	3.5837635240871e-05
AT2G43400	Encodes a unique electron-transfer flavoprotein:ubiquinone oxidoreductase that is localized to the mitochondrion. Mutants are more sensitive to sugar starvation when plants are kept in the dark for long periods.	ETFQO	1.29053673061866	2.51060900646805e-34
AT2G43430	Encodes a predicted mitochondrial glyoxalase GLX2-1. Studies using recombinant protein show that GLX2-1 contains a dinuclear metal binding site, but does not have glyoxalase 2 activity. Required for abiotic stress but not for normal plant growth.	GLX2-1,GLY1	0.564284710484783	2.13834802163031e-08
AT2G43535	Encodes a defensin-like (DEFL) family protein.	NA	0.993353778521915	0.000265604939883743
AT2G43680	Member of IQ67 (CaM binding) domain containing family.	IQD14	0.774665211452818	1.06221281750076e-33
AT2G43690	Concanavalin A-like lectin protein kinase family protein;(source:Araport11)	LecRK-V.3	1.09158885989223	0.00156086148935255
AT2G43700	Concanavalin A-like lectin protein kinase family protein;(source:Araport11)	LecRK-V.4	1.04762654078996	7.78376372053171e-06
AT2G43750	Arabidopsis thaliana O-acetylserine (thiol) lyase (OAS-TL) isoform oasB, the key enzyme for fixation of inorganic sulfide. It catalyzes the formation of cysteine from O-acetylserine and inorganic sulfide. Required for pollen tube growth and/or fertilization.	ACS1,ATCS-B,CPACS1,OASB	0.660884905895161	1.19814097437272e-14
AT2G43790	Encodes a MAP kinase induced by pathogens, ethylene biosynthesis, oxidative stress and osmotic stress.Also involved in ovule development. Homozygous mutants in a MPK3 heterozygous background are female sterile due to defects in integument development.MPK6 appears to be associated with the microsomal compartment and may be involved in mediating secretory processes. The mRNA is cell-to-cell mobile.	ATMAPK6,ATMPK6,MAPK6,MPK6	0.381771621325456	3.2259747465583e-07
AT2G43920	S-adenosyl-L-methionine-dependent methyltransferases superfamily protein;(source:Araport11)	ATHOL2,HOL2	1.1486144009875	0.00573327636245314
AT2G43930	Protein kinase superfamily protein;(source:Araport11)	NA	1.45279278837594	0.000110146556475433
AT2G43940	S-adenosyl-L-methionine-dependent methyltransferases superfamily protein;(source:Araport11)	ATHOL3,HOL3	0.541084860232988	0.0287378349364654
AT2G43970	RNA-binding protein;(source:Araport11)	AtLARP6b,LARP6b	0.675889085658994	4.34561557537458e-19
AT2G44065	Ribosomal protein L2 family;(source:Araport11)	NA	0.436561181490348	0.00731673449211927
AT2G44080	Encodes ARL, a gene similar to ARGOS involved in cell expansion-dependent organ growth. Upregulated by brassinosteroid. Acts downstream of BRI1. The mRNA is cell-to-cell mobile.	ARL	2.40334367821466	3.25971801673818e-85
AT2G44100	GDP dissociation inhibitor involved in vesicular membrane traffic	AT-GDI1,ATGDI1,GDI1	0.238086666914391	0.000325934753175493
AT2G44110	A member of a large family of seven-transmembrane domain proteins specific to plants, homologs of the barley mildew resistance locus o (MLO) protein. The Arabidopsis genome contains 15 genes encoding MLO proteins, with localization in plasma membrane. Phylogenetic analysis revealed four clades of closely-related AtMLO genes. ATMLO15 belongs to the clade II, with ATMLO13 and ATMLO15. The gene is e…	ATMLO15,MLO15	0.576581664919291	0.0161804393392527
AT2G44120	Ribosomal protein L30/L7 family protein;(source:Araport11)	NA	0.279597381184495	0.000282671872990691
AT2G44130	Encodes a member of a family of F-box proteins, called the KISS ME DEADLY (KMD) family. Component of SCF ubiquitin protein ligase, interacts with phenylalanine ammonia-lyase. AtKFB39 is a homolog of previously identified AtKFB50 (At3g59940) and specifically interacts with Arabidopsis PAL3 and PAL4 in vitro. In planta, together with AtKFB01, KFB20 and KFB50, it regulates PAL protein stability thus…	KFB39,KMD3	0.298935716223814	0.00606110368537282
AT2G44180	Encodes a MAP2 like methionine aminopeptidase. In MAP1A mutant background plants show an increased sensitivity to fumagillin resulting in defects in development. Phenotype is similar to RNAi lines which knock out all MAP2/MAP1 loci.	MAP2A	1.01391129690387	1.51383091816519e-18
AT2G44220	NEP-interacting protein (DUF239);(source:Araport11)	NA	1.05662222654361	0.00151886655063528
AT2G44310	Calcium-binding EF-hand family protein;(source:Araport11)	NA	0.573827830862328	0.00171953760361858
AT2G44360	ecotropic viral integration site protein;(source:Araport11)	NA	0.702524995436881	0.00197239842494258
AT2G44380	Cysteine/Histidine-rich C1 domain family protein;(source:Araport11)	NA	0.735128403603769	0.000274578589761828
AT2G44410	RING/U-box superfamily protein;(source:Araport11)	NA	1.18759767036011	8.46639876030461e-42
AT2G44430	DNA-binding bromodomain-containing protein;(source:Araport11)	NA	0.579376696857811	0.000553956196660883
AT2G44450	beta glucosidase 15;(source:Araport11)	BGLU15	0.385171511997548	0.0175148350819493
AT2G44490	Encodes a glycosyl hydrolase that localizes to peroxisomes and acts as a component of an inducible preinvasion resistance mechanism. Required for mlo resistance. The mRNA is cell-to-cell mobile.	BGLU26,PEN2	0.37126072940292	0.0022044645538313
AT2G44500	O-fucosyltransferase family protein;(source:Araport11)	NA	0.482143887615503	2.33368135529381e-07
AT2G44525	NADH dehydrogenase ubiquinone 1 alpha subcomplex assembly factor-like protein (DUF498/DUF598);(source:Araport11)	NA	0.571727169270014	0.000893332485930208
AT2G44570	glycosyl hydrolase 9B12;(source:Araport11)	AtGH9B12,GH9B12	3.37762884910832	5.09206167031094e-33
AT2G44610	Golgi-localized small GTPase, participates in the trafficking of CESA6 to the plasma membrane, maintaining Golgi organization and morphology, possible role in exocytosis. Plays and important role in hypocotyl growth by influencing cell elongation/growth and deposition of cellulose microfibrils in the cell wall. Plays an important role in cellulose synthesis. Influences both the distribution and v…	ATRAB6A,ATRABH1B,RAB6,RAB6A	0.54611381505762	1.14771502851336e-09
AT2G44640	TRIGALACTOSYLDIACYLGLYCEROL-like protein;(source:Araport11)	NA	0.334981906096191	0.00669406474032914
AT2G44680	Encodes casein kinase II beta chain, a CK2 regulatory subunit. Nuclear-localized CKB4 protein exists in vivo as different isoforms, resulting from phosphorylation on serine residues. The phosphorylated isoforms are the preferred substrate for ubiquitination and degradation by the proteasome pathway. Involved in regulation of circadian clock.	CKB4	0.352426136204513	0.00615102006186201
AT2G44730	Alcohol dehydrogenase transcription factor Myb/SANT-like family protein;(source:Araport11)	NA	0.64413617280053	7.46403226238706e-07
[truncated: 3,028 more rows]

## Sheet: Down
GeneID	Description	Aliases	Log2FC	AdjustPvalue
AT1G01060	LHY encodes a myb-related putative transcription factor involved in circadian rhythm along with another myb transcription factor CCA1	LHY,LHY1	-0.776059692334595	1.83204212177452e-16
AT1G01080	RNA-binding (RRM/RBD/RNP motifs) family protein;(source:Araport11)	NA	-0.656822269182849	4.51448385578608e-08
AT1G01120	Encodes a condensing enzyme KCS1 (3-ketoacyl-CoA synthase 1) which is involved in the critical fatty acid elongation process in wax biosynthesis.	KCS1	-0.5736268778943	1.36994765012063e-07
AT1G01320	Encodes REDUCED CHLOROPLAST COVERAGE 1 (REC1) a protein with similarity to the FLOURY locus in maize. Located in the nucleus and cytosol. Contributes to establishing the size of the chloroplast compartment.	REC1	-1.71229176520733	1.09689952255855e-83
AT1G01340	member of Cyclic nucleotide gated channel family	ACBK1,ATCNGC10,CNGC10	-0.849886354205407	5.81772300698958e-05
AT1G01420	Phosphatidylinositol 4-phosphate 5-kinase (PIP5K) enzyme family member.	UGT72B3	-1.66730165617606	6.99405938953876e-13
AT1G01430	Encodes a member of the TBL (TRICHOME BIREFRINGENCE-LIKE) gene family containing a plant-specific DUF231 (domain of unknown function) domain. TBL gene family has 46 members, two of which (TBR/AT5G06700 and TBL3/AT5G01360) have been shown to be involved in the synthesis and deposition of secondary wall cellulose, presumably by influencing the esterification state of pectic polymers.Functions as a …	MOAT3,TBL25	-0.545095303703606	5.41903607037526e-09
AT1G01470	Encodes late-embryogenesis abundant protein whose mRNA levels are induced in response to wounding and light stress. Might be involved in protection against desiccation.	AtLEA14,LEA1,LEA14,LSR3	-0.50118291352517	5.37915467743168e-06
AT1G01520	RVE3 is one of eleven homologous MYB-like transcription factors in Arabidopsis and a member of the RVE8 clade. Plays a minor role in clock regulation.	ASG4,REV3	-4.00641787766461	1.24169771686789e-32
AT1G01540	Protein kinase superfamily protein;(source:Araport11)	NA	-0.357836829781271	0.000414750951026074
AT1G01560	Member of MAP Kinase family. Flg22-induced activation is blocked by AvrRpt2.	ATMPK11,MPK11	-1.78811609196374	0.0100441959196502
AT1G01610	bifunctional sn-glycerol-3-phosphate 2-O-acyltransferase/phosphatase. Involved in cutin assembly and is functionally redundant with GPAT8.	ATGPAT4,GPAT4	-0.856026778821763	1.66593761271507e-18
AT1G01720	Belongs to a large family of putative transcriptional activators with NAC domain. Transcript level increases in response to wounding and abscisic acid. ATAF1 attentuates ABA signaling and sythesis. Mutants are hyposensitive to ABA. The mRNA is cell-to-cell mobile.	ANAC002,ANAC2,ATAF1	-0.363755339908847	0.000713570772763101
AT1G01790	Encodes a member of the cation/proton antiporters-2 antiporter superfamily, the K efflux antiporter KEA1 that is localized to the chloroplast envelope.	ATKEA1,KEA1	-1.22566782123041	2.04016937372648e-59
AT1G01970	Tetratricopeptide repeat (TPR)-like superfamily protein;(source:Araport11)	NA	-1.1979407848335	3.43723126735142e-40
AT1G02080	Acts as scaffold protein in the CCR4-NOT complex, by interacting with various NOT proteins and CAF1. Essential protein for proper pollen development and germination capacity.	NA	-0.241798629391007	0.00045173650002416
AT1G02090	encodes a phosphoprotein that is a subunit of the COP9 signalosome. Mutants exhibit constitutive photomorphogenic phenotype.	ATCSN7,COP15,CSN7,FUS5	-0.930712609516459	8.04237894441433e-24
AT1G02220	NAC domain transcription factor which functions as a negative regulator of the TDIF-PXY module and fine-tunes TDIF signaling in vascular development. Controls the balance of xylem formation and cambial cell divisions.	ANAC003,NAC003	-1.6373085818915	2.42109193993587e-25
AT1G02360	Chitinase family protein;(source:Araport11)	NA	-1.03633950756502	7.63244240669263e-07
AT1G02410	Encodes a member of the cytochrome c oxidase 11 protein family. It is an integral mitochondrial protein and likely plays an important role as a mitochondrial chaperone in COX complex assembly, affecting plant growth and pollen germination.	COX11	-0.456798051752183	0.00164742458419086
AT1G02475	Polyketide cyclase/dehydrase and lipid transport superfamily protein;(source:Araport11)	NA	-1.13807541383496	6.86192092881794e-12
AT1G02560	One of several nuclear-encoded ClpPs (caseinolytic protease). Contains a highly conserved catalytic triad of Ser-type proteases (Ser-His-Asp). The name reflects nomenclature described in Adam et. al (2001). The mRNA is cell-to-cell mobile.	CLPP5,NCLPP1,NCLPP5	-0.58206707133592	2.57908900781221e-11
AT1G02705	hypothetical protein;(source:Araport11)	NA	-1.25642018076505	0.00470542954473573
AT1G02720	Encodes a protein with putative galacturonosyltransferase activity.	AtGATL5,GATL5	-0.388251162951425	0.00704719662822291
AT1G02820	Late embryogenesis abundant 3 (LEA3) family protein;(source:Araport11)	AtLEA3,LEA2,LEA3	-1.33949335945013	0.00784208211547813
AT1G02850	beta glucosidase 11;(source:Araport11)	BGLU11	-1.30641860093159	3.25563009424643e-48
AT1G02880	Encodes a thiamine pyrophosphokinase capable of producing thiamine pyrophosphate from free thiamine.	TPK1	-1.36571959326976	1.70826912118494e-30
AT1G02910	Mutants defective in this gene were shown to have a reduced PSII content (overall reduction in the levels of several PSII subunits) and a disrupted grana stack structure. The N-terminal half of the protein contains two tetratricopeptide repeat (TPR) motifs that are arranged tandemly, each consisting of a 34-residue degenerate consensus sequence. The N-terminal sequence is rich in positive and hyd…	LPA1	-0.503986546454541	4.20254978988905e-05
AT1G02930	Encodes glutathione transferase belonging to the phi class of GSTs. Naming convention according to Wagner et al. (2002).	ATGST1,ATGSTF3,ATGSTF6,ERD11,GST1,GSTF6	-1.95823685386818	1.25753023106363e-30
AT1G03040	Governs the competence of pericycle cells to initiate lateral root primordium formation.	NA	-0.299204132736145	0.00470250195538615
AT1G03055	Encodes the ortholog of rice D27. It is plastid-localized and is required for the inhibition of secondary bud outgrowth and operates on a nonmobile precursor upstream of MAX1 in the SL biosynthesis pathway.	AtD27,D27	-7.43498882949264	3.50641470529081e-09
AT1G03060	Encodes a WD/BEACH domain protein involved in cell morphogenesis and ribonucleoprotein particle formation. It interacts with the P-body core component DCP2, associates to mRNA processing bodies (P-bodies), and regulates their assembly upon salt stress. It accumulates at the root hair apex via post-Golgi compartments and positively regulates tip growth by maintaining tip-focused vesicle secretion …	BCHA1,SPI	-0.229534063800426	0.000548678564808567
AT1G03070	Bax inhibitor-1 family protein;(source:Araport11)	AtLFG4,LFG4	-1.86328147897843	9.84471762285255e-17
AT1G03110	Encodes a gene involved in the modification of nucleosides in tRNA. Mutants have no 7-methylguanosine.	AtTRM82,TRM82	-0.965514675884193	3.31076063424005e-13
AT1G03130	Encodes a protein predicted by sequence similarity with spinach PsaD to be photosystem I reaction center subunit II (PsaD2)	PSAD-2	-2.18324855575569	3.67466652092314e-124
AT1G03220	Eukaryotic aspartyl protease family protein;(source:Araport11)	NA	-0.683081208680313	4.41190492204262e-14
AT1G03250	R3H domain protein involved in ribosome biogenesis.	NA	-0.70610754821575	1.28342910264408e-06
AT1G03300	Member of the plant-specific DUF724 protein family. Arabidopsis has 10 DUF724 proteins. Loss of function mutant has a WT phenotype	ATDUF1,DUF1	-1.07265953143535	0.00112232438037798
AT1G03310	Encodes a protein with strong similarity to isoamylase (EC:3.2.1.68) however lacks critical residues known to be important for activity. Appears to co localize with ISA1 in the chloroplast isoamylase complex. Mutations in this gene cause the loss of detectable isoamylase activity and the disruption of normal starch structure. It has been postulated that AtISA2 interacts with AtISA1 to form the Is…	AtBE2,ATISA2,BE2,DBE1,ISA2	-0.960359222063134	9.68969109423792e-18
AT1G03445	encodes a serine?threonine protein phosphatase with an N-terminal Kelch-repeat domain, which is nuclear localized and expressed preferentially in elongating cells. Genetic evidence suggest that this gene plays a redundant role (along with other members of the same gene family) in modulating growth in response to brassinosteroid.	BSU1	-1.35845357101681	0.00725375618187986
AT1G03457	RNA-binding (RRM/RBD/RNP motifs) family protein;(source:Araport11)	AtBRN2,BRN2	-0.481530359501834	0.000955212853295154
AT1G03495	HXXXD-type acyl-transferase family protein;(source:Araport11)	NA	-6.16768078247985	5.19266734599877e-35
AT1G03590	Protein phosphatase 2C family protein;(source:Araport11)	NA	-0.549154743133461	2.70175208072632e-06
AT1G03600	PSB27 is a chloroplast lumen localized protein that is involved in adaptation to changes in light intensity.	PSB27	-1.57599690243451	2.05992042005577e-80
AT1G03630	Encodes for a protein with protochlorophyllide oxidoreductase activity. The enzyme is NADPH- and light-dependent.	POR_C,PORC	-1.77888758700236	8.94137572624992e-78
AT1G03680	Encodes a m-type thioredoxin (Trx-m1) localized in chloroplast stroma.	ATHM1,ATM1,THM1,TRX-M1	-1.21575302455676	3.51057045690147e-52
AT1G03700	Uncharacterized protein family (UPF0497);(source:Araport11)	CASPL1C2	-2.18025055978192	1.14402443185541e-06
AT1G03905	P-loop containing nucleoside triphosphate hydrolases superfamily protein;(source:Araport11)	ABCI19,ATNAP4	-0.713082743444868	0.00160788223161637
AT1G03930	Phosphorylates serine, threonine, and tyrosine	ADK1,CKL9ALPHA,CKL9BETA	-0.818192791239971	2.22516719053317e-20
AT1G03940	HXXXD-type acyl-transferase family protein;(source:Araport11)	NA	-5.40659226413325	3.32972175846119e-62
AT1G04000	hypothetical protein;(source:Araport11)	NA	-0.711516724538983	5.59435445819709e-07
AT1G04110	Initially identified as a mutation affecting stomatal development and distribution. Encodes a protein similar to serine proteases.	AtSDD1,SDD1	-0.917403601530409	0.000152869227989794
AT1G04120	encodes a high-affinity inositol hexakisphosphate transporter that plays a role in guard cell signaling and phytate storage. It is a member of MRP subfamily / ABC transporter subfamily C.	ABCC5,ATABCC5,ATMRP5,MRP5,MRP5	-0.162794266355306	0.040589095094483
AT1G04130	Encodes one of the 36 carboxylate clamp (CC)-tetratricopeptide repeat (TPR) proteins (Prasad 2010, Pubmed ID: 20856808). Interacts with Hsp90/Hsp70 as co-chaperone.	AtTPR2,TPR2	-0.749735610666486	0.00111420560000919
AT1G04160	Encodes a member of the type XI myosin protein family involved in root hair elongation.	ATXIB,XI-8,XI-B,XIB	-0.494418464202379	8.09710652265923e-05
AT1G04210	Encodes a putative Raf-related kinase.	NA	-0.526659123130289	7.02785377743774e-11
AT1G04220	Encodes KCS2, a member of the 3-ketoacyl-CoA synthase family involved in the biosynthesis of VLCFA (very long chain fatty acids).	DAISY,KCS2	-1.50942948140486	8.16176722024062e-30
AT1G04290	Thioesterase superfamily protein;(source:Araport11)	NA	-0.45746646414308	0.00519509177196611
AT1G04350	encodes a protein whose sequence is similar to 2-oxoglutarate-dependent dioxygenase	NA	-2.03453789675786	5.47879904760498e-39
AT1G04520	Encodes a plasmodesmal protein that may be involved in the intercellular movement of molecules through the plasmodesmata.	PDLP2	-1.32423053200586	3.14202071988857e-14
AT1G04530	Encodes one of the 36 carboxylate clamp (CC)-tetratricopeptide repeat (TPR) proteins (Prasad 2010, Pubmed ID: 20856808) with potential to interact with Hsp90/Hsp70 as co-chaperones.	TPR4	-1.22040926203916	5.25787814907336e-22
AT1G04640	Lipoyltransferase, located in mitochondria but not found in chloroplasts	LIP2	-0.409071333454817	0.00821577828631872
AT1G04650	FLIP is a member of a conserved gene family with wide distribution across taxa. In Arabidopsis, it forms a complex with FIGL1 regulates meiotic crossover formation via RAD51 and DMC1.	FLIP	-1.76701071210982	1.4736193388284e-14
AT1G04710	EC2.3.1.16 thiolase. Its transcript levels change after inducing MUTE expression in a mute background.	KAT1,PKT4	-0.770619184378702	0.000112838750565756
AT1G04730	Necessary for sister chromatid cohesion. Acts in synergy with ETG1.	CTF18	-0.527891258516403	0.0126097193501419
AT1G04870	Encodes a type I protein arginine methyltransferase based on the At1g04870.2 gene model. PRMT10 can catalyze the asymmetric dimethylation of arginine 3 on histone 4 and can also methylate myelin basic protein in vitro. Mutants lacking PRMT10 flower late due to defects in the autonomous pathway and they have elevated levels of FLC transcripts.	ATPRMT10,PRMT10	-0.281784374766671	0.0486421625626654
AT1G04880	Encodes a ARID-HMG DNA-binding protein that functions in pollen tube growth through the regulation of gene expression by interacting with the transcription factors AGL66 and AGL104.	AtHMGB15,HMGBD15	-1.93821872089417	0.000198187133497104
AT1G04940	Tic20 is believed to function as a component of the protein-conducting channel at the inner envelope membrane. Genes AT1G04940 and AT1G04945 were switched for the TAIR7 genome release to give consistency with MIPs annotation. The Arabidopsis genome encodes four Tic20 homologous proteins, AT1G04940(Tic20-I), AT2G47840(Tic20-II), AT4G03320(Tic20-IV) and AT5G55710(Tic20-V).	atTIC20,AtTic20-I,TIC20,Tic20-I	-0.621544720687761	1.25673062719376e-11
AT1G04945	HIT-type Zinc finger family protein;(source:Araport11)	NA	-0.640351293480657	0.00112637568293419
AT1G04960	golgin family A protein (DUF1664);(source:Araport11)	NA	-0.342466934599562	0.027090641596832
AT1G04980	Encodes a protein disulfide isomerase-like (PDIL) protein, a member of a multigene family within the thioredoxin (TRX) superfamily. Transcript levels for this gene are up-regulated in response to three different chemical inducers of ER stress (dithiothreitol, beta-mercaptoethanol, and tunicamycin). AtIRE1-2 does not appear to be required for this response, but the atbzip60 mutant has a diminished…	ATPDI10,ATPDIL2-2,PDI10,PDIL2-2	-0.589984861930356	8.77851694154529e-05
AT1G04990	Zinc finger C-x8-C-x5-C-x3-H type family protein;(source:Araport11)	NA	-0.440746832976235	0.000174465601642743
AT1G05060	coiled-coil protein;(source:Araport11)	NA	-0.493816930953574	0.00373869526341176
AT1G05070	transmembrane protein, putative (DUF1068);(source:Araport11)	NA	-0.808364114274637	2.73673338551659e-10
AT1G05100	member of MEKK subfamily. Negatively regulated by RGLG1 and RGLG2; involved in drought stress tolerance.	MAPKKK18	-2.29607773953836	0.000264061538144205
AT1G05140	Peptidase M50 family protein;(source:Araport11)	NA	-1.11821504222917	1.11827188904799e-37
AT1G05190	Encodes the plastid 50S ribosomal protein L6.	EMB2394,RPL6	-0.527139652317147	2.43591687282192e-07
AT1G05200	Encodes a putative glutamate receptor GLR3 with dual localization in plastid and plasma membrane.	ATGLR3.4,GLR3.4,GLUR3	-0.38859973538812	0.000397969714059132
AT1G05230	Encodes a homeobox-leucine zipper family protein belonging to the HD-ZIP IV family. Mutants have trichomes that appear glass-like under a dissecting microscope as compared to the wild-type trichomes. The mutations do not affect trichome growth or branch number.	HDG2	-0.857059217110265	5.73533473767773e-16
AT1G05333	Natural antisense transcript overlaps with AT1G17810;(source:Araport11)	NA	-0.408461529014701	0.000878354200900462
AT1G05340	cysteine-rich TM module stress tolerance protein;(source:Araport11)	AthCYSTM1	-1.27561959881578	5.66740471828469e-08
AT1G05450	Encodes a Protease inhibitor/seed storage/LTP family protein	NA	-3.45751328510156	7.89195623713129e-13
AT1G05540	hypothetical protein (DUF295);(source:Araport11)	NA	-1.39659924246277	0.0495478972191992
AT1G05560	A UDP-glucose transferase localized in the phragmoplast. It has been co-purified with the callose synthase complex and may transfer UDP-glucose from sucrose synthase to the callose synthase and thus help form a substrate channel for the synthesis of callose at the forming cell plate. Induced by salicylic acid. Independent of NPR1 for their induction by salicylic acid. UGT1 encodes a protein with …	UGT1,UGT75B1	-1.92691823600516	1.34782915708823e-49
AT1G05562	Natural antisense transcript overlaps with AT1G05560;(source:Araport11)	NA	-1.58100725690101	1.14257134666543e-32
AT1G05630	Encodes an inositol polyphosphate 5-phosphatase with phosphatase activity toward only Ins(1,4,5)P3. Induced in response to ABA and wounding treatments. Expressed in young seedlings and flowers, while no transcripts were detectable in maturated roots, stems, and rosette leaves Modulates the development of cotyledon veins through its regulation of auxin homeostasis. Involved in blue light light?sti…	5PTASE13,AT5PTASE13	-0.549010887838805	2.63252188958836e-05
AT1G05675	UDP-Glycosyltransferase superfamily protein;(source:Araport11)	NA	-3.74389177266553	1.07749660679155e-08
AT1G05680	Encodes a UDP-glucosyltransferase, UGT74E2, that acts on IBA (indole-3-butyric acid) and affects auxin homeostasis. The transcript and protein levels of this enzyme are strongly induced by H2O2 and may allow integration of ROS (reactive oxygen species) and auxin signaling. This enzyme can also transfer glycosyl groups to several compounds related to the explosive TNT when this synthetic compound …	UGT74E2	-3.16787659194284	2.44223047480953e-24
AT1G05690	BTB and TAZ domain protein. Acts redunantly with BT1 and BT2 during female gametophyte development. Acts with BT2 during male gametophyte development.	BT3	-1.08782496982174	0.000762202691226288
AT1G05870	hypothetical protein (DUF1685);(source:Araport11)	NA	-1.18901430087971	8.56869344602217e-38
AT1G05900	endonuclease III 2;(source:Araport11)	ATNTH2,NTH2	-0.671720788682221	0.000424993944005043
AT1G05910	Encodes an acetylated histone-binding protein BRAT1. BRAT1 forms a complex with BRP1 to prevent transcriptional silencing.	BRAT1	-0.583969059163516	3.64356528300348e-11
AT1G06000	encodes a flavonol-7-O-rhamnosyltransferase involved in the formation of rhamnosylated flavonols	UGT89C1	-4.03948180371867	3.40639288812085e-233
AT1G06040	Encodes salt tolerance protein (STO) which confers salt tolerance to yeast cells. Fully complements calcineurin deficient yeast but does not encode a phosphoprotein phosphatase. Sequence has similarities to CONSTANS. STO co-localizes with COP1 and plays a role in light signaling.STO transcript levels are regulated by photoperiod and phtyohormones. STO competes with FLC in the regulation of floral…	BBX24,STO	-2.86969363322694	2.35478317364875e-188
AT1G06150	Encodes a LHW-like protein with 79% amino acid identity to LHW.	EMB1444,LHL1	-0.996142926734046	4.29220352676219e-22
AT1G06180	member of MYB3R- and R2R3- type MYB- encoding genes	ATMYB13,ATMYBLFGN,MYB13	-3.30334141550278	5.84689714053823e-46
AT1G06190	Encodes a novel ribonucleic acid-binding protein that interacts with the endonuclease RNase E and supports its function in processing plastid ribonucleic acids.	RHON1	-0.400111154918575	5.56082819516657e-05
AT1G06220	Encodes a protein with similarity to splicing factor Snu114. Snu114 is thought to be involved in activation of the splicosome. Loss of GFA1 function results in reduced female fertility. Approximately 50% of ovules abort due to defects in the female gametophyte. In mutant gametophytes antipodal cells express egg cell markers suggesting a defect in specification of cell fate.GFA1 is also required t…	CLO,GFA1,MEE5	-0.338184262655541	5.35538755173156e-06
AT1G06240	diiron containing four-helix bundle family ferritin protein, putative (Protein of unknown function DUF455);(source:Araport11)	NA	-0.562483301965097	0.000577827644865287
AT1G06270	Pentatricopeptide repeat (PPR) superfamily protein;(source:Araport11)	NA	-0.528965994015288	0.00532183981668446
AT1G06380	Ribosomal protein L1p/L10e family;(source:Araport11)	NA	-0.502315551636191	0.00379854540652813
AT1G06410	Encodes an enzyme putatively involved in trehalose biosynthesis. Though the protein has both trehalose-6-phosphate synthase (TPS)-like and trehalose-6-phosphate phosphatase (TPP)-like domains, neither activity has been detected in enzymatic assays nor has the protein been able to complement yeast TPS or TPP mutants.	ATTPS7,ATTPSA,TPS7,TPS7	-0.491683147286823	2.20601581070849e-09
AT1G06430	encodes a FtsH protease that is localized to the chloroplast	FTSH8	-3.21595907213319	0
AT1G06470	Nucleotide/sugar transporter family protein;(source:Araport11)	NA	-0.301538921787453	0.00607396116808497
AT1G06475	transmembrane protein;(source:Araport11)	NA	-1.41063444467675	0.0226324980984851
AT1G06540	hypothetical protein;(source:Araport11)	NA	-3.69498265021895	5.78460434713804e-06
AT1G06550	ATP-dependent caseinolytic (Clp) protease/crotonase family protein;(source:Araport11)	NA	-1.64591100125353	8.94665367832957e-64
AT1G06590	anaphase-promoting complex subunit;(source:Araport11)	NA	-0.301815053903388	0.0296430548702283
AT1G06640	encodes a protein whose sequence is similar to a 2-oxoglutarate-dependent dioxygenase The mRNA is cell-to-cell mobile.	NA	-0.463937318702288	0.000240380489468894
AT1G06645	2-oxoglutarate (2OG) and Fe(II)-dependent oxygenase superfamily protein;(source:Araport11)	NA	-0.603526745142853	0.0180658443460581
AT1G06650	encodes a protein whose sequence is similar to 2-oxoglutarate-dependent dioxygenase The mRNA is cell-to-cell mobile.	NA	-1.23615598525518	1.07467072593443e-32
AT1G06670	nuclear DEIH-box helicase (NIH) encoding a putative RNA and/or DNA helicase homologous to a group of nucleic acid helicases from the DEAD/H family with nuclear DEIH-box helicase (NIH) distinct N- and C-terminal regions that differ from animal DEIH proteins The mRNA is cell-to-cell mobile.	NIH	-0.301897436379763	0.000263359738474599
AT1G06680	Encodes a 23 kD extrinsic protein that is part of photosystem II and participates in the regulation of oxygen evolution. Phosphorylation of this protein is dependent on calcium. In plsp1-1 mutant plastids, the nonmature form of the protein localizes in the stroma. The mRNA is cell-to-cell mobile.	OE23,OEE2,PSBP-1,PSII-P	-1.456645778786	4.16939437099198e-87
AT1G06690	NAD(P)-linked oxidoreductase superfamily protein;(source:Araport11)	NA	-2.48523391867375	2.16089481376616e-92
AT1G06720	P-loop containing nucleoside triphosphate hydrolases superfamily protein;(source:Araport11)	NA	-0.290262392296617	0.0257902895390842
AT1G06730	pfkB-like carbohydrate kinase family protein;(source:Araport11)	NA	-0.508795716358112	6.92897926721191e-05
AT1G06740	Encodes a member of a domesticated transposable element gene family MUSTANG. Members of this family are derived from transposable elements genes but gained function in plant fitness and flower development. Known members include: AT3G04605 (MUG1), AT2G30640 (MUG2), AT1G06740 (MUG3), AT5G16505 (MUG4), AT3G06940 (MUG5), AT5G48965 (MUG6), AT3G05850 (MUG7) and AT5G34853 (MUG8).	MUG3	-0.400196661939632	0.019452994775854
AT1G06820	Encodes carotenoid isomerase. Catalyzes the isomerization of poly-cis-carotenoids to all-trans-carotenoids. Together with PDS and ZDS, CRTiso is required to complete the synthesis of lycopene from phytoene.	CCR2,CRTISO	-0.868203357437673	2.50220656929626e-16
AT1G06870	Peptidase S24/S26A/S26B/S26C family protein;(source:Araport11)	Plsp2A	-0.303158380926738	0.00573403028357068
AT1G06950	Encodes a protein thought to be a part of the translocon at the chloroplast inner envelope. Involved in protein import into the chloroplast and chloroplast biogenesis. C-terminal half of Tic110 functions as scaffolds for protein-protein interactions.	ATTIC110,TIC110	-0.231698253302603	0.00247786068584256
AT1G07010	Calcineurin-like metallo-phosphoesterase superfamily protein;(source:Araport11)	AtSLP1,SLP1	-1.90057726994712	3.00335212981558e-52
AT1G07128	Natural antisense transcript overlaps with AT1G07130;(source:Araport11)	NA	-2.19217916796618	4.82644194197349e-15
AT1G07130	Encodes a protein with similarity to yeast STN1, an OB fold protein involved in protecting yeast telomeres. In Arabidopsis, loss of STN1 function mutations exhibit gross morphological abnormalities and defects in telomere architecture and maintenance. STN1 likely plays a role in telomere end capping.	ATSTN1,STN1	-0.915343474427648	0.00070342740289233
AT1G07135	glycine-rich protein;(source:Araport11)	NA	-1.49938345768412	0.000126228681531055
AT1G07150	Member of MEKK subfamily. Involved in wound induced signaling where it interacts with At5g40440, and activates At1g59580.	MAPKKK13	-3.08270033918524	1.29123659422336e-113
AT1G07160	Protein phosphatase 2C family protein;(source:Araport11)	NA	-2.89575158048188	3.11693350503708e-08
AT1G07180	Internal NAD(P)H dehydrogenase in mitochondria. The predicted protein sequence has high homology with other designated NAD(P)H DHs from microorganisms; the capacity for matrix NAD(P)H oxidation via the rotenone-insensitive pathway is significantly reduced in the Atndi1 mutant plant line; the in vitro translation product of AtNDI1 is imported into isolated mitochondria and located on the inside of…	ATNDI1,NDA1	-8.06226579412871	1.36763188943604e-39
AT1G07250	UDP-glucosyl transferase 71C4;(source:Araport11)	UGT71C4	-1.91786904565468	6.87570401983539e-137
AT1G07280	Tetratricopeptide repeat (TPR)-like superfamily protein;(source:Araport11)	NA	-1.23870273398843	6.95181274895221e-26
AT1G07330	dentin sialophosphoprotein;(source:Araport11)	NA	-2.08211183723851	0.0421084251696884
AT1G07350	Encodes a serine/arginine rich-like protein, SR45a. Involved in the regulation of stress-responsive alternative splicing.	SR45a	-0.807953142294281	5.16605488812527e-15
AT1G07360	Encodes MAC5A, a component of the MOS4-associated complex (MAC) that contributes to snc1- mediated autoimmunity. MAC is a highly conserved nuclear protein complex associated with the spliceosome. Homologues include AT1G07360 (MAC5A), AT2G29580 (MAC5B) and AT5G07060 (MAC5C).	MAC5A	-0.463268254864664	5.47837868403097e-08
AT1G07370	Encodes putative proliferating cell nuclear antigen involved in cell cycle regulation. May be sumoylated.	ATPCNA1,PCNA1	-0.695914704956853	0.000176053174880835
AT1G07400	HSP20-like chaperones superfamily protein;(source:Araport11)	NA	-4.03800558456665	4.21102212416877e-37
AT1G07420	Arabidopsis thaliana sterol 4-alpha-methyl-oxidase mRNA. The sterol 4alpha-methyl oxidase2 family proteins SMO2-1 and SMO2-2 function partially through effects on auxin accumulation, auxin response and PIN1 expression to regulate embryogenesis in Arabidopsis.	ATSMO1,SMO2-1	-0.679366519066939	4.19045408828284e-10
AT1G07450	NAD(P)-binding Rossmann-fold superfamily protein;(source:Araport11)	NA	-5.79356560256438	1.33205203672371e-05
AT1G07510	encodes an FtsH protease that is localized to the mitochondrion	AtFTSH10,FTSH10	-1.57229073553339	1.60209587379444e-58
AT1G07590	Tetratricopeptide repeat (TPR)-like superfamily protein;(source:Araport11)	NA	-0.263472095507826	0.0429172083387986
AT1G07600	metallothionein, binds to and detoxifies excess copper and other metals, limiting oxidative damage.	ATMT-2,ATMT-Q,ATMT1,LSR4,MT-Q,MT1,MT1A	-0.724937997000439	0.00352204164412183
AT1G07610	one of the five metallothioneins (MTs) genes identified in Arabidopsis. MTs are cysteine-rich proteins required for heavy metal tolerance. The mRNA is cell-to-cell mobile.	MT1C	-0.84060170576729	0.00170749116430686
AT1G07700	Thioredoxin superfamily protein;(source:Araport11)	NA	-1.31900296376838	5.77085395146914e-20
AT1G07705	NOT2 / NOT3 / NOT5 family;(source:Araport11)	NOT2a	-0.326435956548708	0.000936559900771546
AT1G07720	Encodes KCS3, a member of the 3-ketoacyl-CoA synthase family involved in the biosynthesis of VLCFA (very long chain fatty acids).	KCS3	-1.10812911617355	1.49014314369039e-17
AT1G07790	Encodes a histone 2B (H2B) protein.	HTB1	-0.426649700919247	0.00925166117286947
AT1G07890	Encodes a cytosolic ascorbate peroxidase APX1. Ascorbate peroxidases are enzymes that scavenge hydrogen peroxide in plant cells. Eight types of APX have been described for Arabidopsis: three cytosolic (APX1, APX2, APX6), two chloroplastic types (stromal sAPX, thylakoid tAPX), and three microsomal (APX3, APX4, APX5) isoforms. At least part of the induction of heat shock proteins during light stres…	APX1,ATAPX01,ATAPX1,CS1,MEE6	-0.741638370178132	2.77537336379092e-18
AT1G07930	GTP binding Elongation factor Tu family protein;(source:Araport11)	NA	-0.23045807639815	0.00715364910162738
AT1G08000	Encodes a member of the GATA factor family of zinc finger transcription factors.	GATA10	-0.621905200029963	4.23845334308637e-05
AT1G08040	trimethylguanosine synthase (DUF707);(source:Araport11)	NA	-0.483205988233199	0.00337560007325322
AT1G08050	Zinc finger (C3HC4-type RING finger) family protein;(source:Araport11)	NA	-0.778819161209019	9.89560361340686e-09
AT1G08060	Encodes a transcriptional silencer that is required for proper expression of PRR/NLR immune receptor genes.	MOM,MOM,MOM1	-0.20216860335577	0.0171444092191637
AT1G08130	Encodes the Arabidopsis DNA ligase 1 that provides the major DNA ligase activity in cells and plays a key role in both DNA replication and excision repair pathways. In addition, it is an important component of the active DNA demethylation machinery and is indispensable for cell viability. AtLIG1 expresses one major and two minor mRNA transcripts differing only in the length of the 5' untranslated…	ATLIG1,LIG1	-0.844741999874672	3.26954958819336e-20
AT1G08190	Might be involved in protein sorting to the vacuole. The mRNA is cell-to-cell mobile.	ATVAM2,ATVPS41,VAM2,VPS41,ZIP2	-0.605074115375386	2.92317612672136e-14
AT1G08200	Encodes a putative UDP-D-apiose/UPD-D-xylose synthetase.	AXS2	-0.40362608637915	1.01148921203495e-07
AT1G08250	Encodes a plastid-localized arogenate dehydratase involved in phenylalanine biosynthesis. Although this enzyme has sequence similarity to prephenate dehydratases, it is 98 times more active with arogenate than prephenate in enzymatic assays.	ADT6,AtADT6	-0.617482613686597	3.68895811953624e-08
AT1G08260	Similar to POL2A, DNA polymerase epsilon catalytic subunit. Essential for Arabidopsis growth. Null homozygotes are embryo lethal, partial loss of function alleles show embryo patterning defects such as root pole displacement. Delayed progression through cell cycle results in embryos with smaller numbers of larger cells.	ABO4,EMB142,EMB2284,EMB529,ESD7,POL2A,TIL1	-0.777786843164682	8.93251601453044e-16
AT1G08270	vacuolar protein sorting-associated protein;(source:Araport11)	NA	-1.76443286551685	0.012571607481851
AT1G08300	no vein-like protein;(source:Araport11)	NVL	-0.484136909330669	0.0300550378847075
AT1G08380	Encodes subunit O of photosystem I.	PSAO	-2.42402113687945	2.42305242448357e-207
AT1G08390	Involved in preserving the stability of 45S rDNA repeats.	RMI2	-0.807787740301024	0.0150930206180191
AT1G08410	Encodes a large 60S subunit nuclear export GTPase 1 that is required for 40S maturation and is involved in ribosome biogenesis and affects multiple auxin-regulated development processes.	DIG6,LSG1-2	-0.51509292174327	1.94141869151116e-05
AT1G08470	Although this enzyme is predicted to encode a strictosidine synthase (SS), it lacks a conserved catalytic glutamate residue found in active SS enzymes and it is not expected to have SS activity.	SSL3	-0.399231935045322	0.0136803716099799
AT1G08490	Chloroplastic NifS-like protein that can catalyze the conversion of cysteine into alanine and elemental sulfur (S(0)) and of selenocysteine into alanine and elemental Se (Se(0)). Overexpression enhances selenium tolerance and accumulation.	ATCPNIFS,ATNFS2,ATSUFS,CPNIFS,SUFS	-0.379369094994152	0.000103627617094665
AT1G08520	Encodes the CHLD subunit of the Mg-chelatase enzyme involved in chlorophyll biosynthesis. Lines carrying recessive mutations of this locus are white and seedling lethal.	ALB-1V,ALB1,CHLD,PDE166,V157	-0.485111844077707	2.28285023291572e-09
AT1G08540	Enodes a subunit of chloroplast RNA polymerase, confers the ability to recognize promoter sequences on the core enzyme. SIG1 is induced by red and blue light.	ABC1,ATSIG1,ATSIG2,SIG1,SIG2,SIGA,SIGB	-1.3066594567266	1.9635095429403e-53
AT1G08550	Violaxanthin deepoxidase involved in xanthophyll cycle.Two major consequences of the npq1 mutation are the absence of zeaxanthin formation in strong light and the partial inhibition of the quenching of singlet excited chlorophylls in the photosystem II light-harvesting complex	AVDE1,NPQ1	-1.01970010977534	2.71498960215886e-23
AT1G08570	Encodes a member of the thioredoxin family protein. Located in the chloroplast. Shows high activity towards the chloroplast 2-Cys peroxiredoxin A, and poor activity towards the chloroplast NADP-malate dehydrogenase. The mRNA is cell-to-cell mobile.	ACHT4	-1.27669942402961	3.02122018057988e-47
AT1G08610	Pentatricopeptide repeat (PPR) superfamily protein;(source:Araport11)	NA	-0.487504634189344	0.00338148539885947
AT1G08620	Member of family of Jumonji C (JmjC)-containing demethylases, its catalytic domain exhibits both H3K4 and H3K9 demethylation activities. Together with MMD1 promotes in male meiocytes gene expression in an H3K9me3-dependent manner and thereby contributes to meiotic chromosome condensation.	JMJ16,PKDM7D	-0.306949071237172	0.000638356840502973
AT1G08640	Encodes a choloroplast membrane protein CJD1 (Chloroplast J-like Domain 1). Predicted to contain a transit peptide, three transmembrane domains and an N-terminal J-like domain. Influences fatty acid composition of chloroplast lipids.	CJD1	-0.375340983330599	0.000605460809261298
AT1G08840	Encodes a homolog of human and yeast DNA2. Mutants have increased sensitivity to DNA damage stress.	emb2411,JHS1	-0.649460619982911	4.98474378427268e-05
AT1G08845	Member of the uL18 RNA-binding protein family. uL18 proteins share a short structurally conserved domain that binds the 5S rRNA and allow its incorporation into ribosomes.	HES	-0.617568667574867	0.0160048438820347
AT1G08860	Encodes a copine-like protein, which is a member of a newly identified class of calcium-dependent, phospholipid binding proteins that are present in a wide range of organisms. Overexpression of this gene suppresses bon1-1 phenotypes. Double mutant analyses with bon1-1 suggest that BON1 and BON3 have overlapping functions in maintaining cellular homeostasis and inhibiting cell death.	BON3	-2.1444151391493	0.0148423324663616
AT1G08910	Encodes an SP-RING domain containing protein that functions in sumolaytion and is involved in positive regulation of sulfur metabolism and stress response.	PIAL1	-0.473905011640943	1.58792427679274e-05
AT1G08920	Encodes ESL1, a transporter for monosaccharides.	ESL1	-0.864393282601342	1.11669873585466e-17
AT1G09000	NPK1-related protein kinase 1S	ANP1,MAPKKK1,NP1	-0.4641274081583	0.0399830363658303
AT1G09020	Component of the regulatory subunit of SNF1-related protein kinase. As part of the regulatory complex it binds maltose which promotes kinase activity.	ATSNF4,KIN,SNF4	-0.294248556408887	0.00021915255319091
AT1G09023	Natural antisense transcript overlaps with AT1G68940;(source:Araport11)	NA	-0.272980673912337	0.0461066637830448
AT1G09040	arginine-glutamic acid dipeptide repeat protein;(source:Araport11)	NA	-0.95930567961782	9.72398052642651e-07
AT1G09050	arginine-glutamic acid dipeptide repeat protein;(source:Araport11)	NA	-0.805483067711651	9.54359883998734e-06
AT1G09060	JMJ24 is a nuclear localized JmjC domain containing protein. It has been shown to bind to transcribed regions AtSN1 and solo LTR and the promoter of SDC. JMJ24 appears to regulate basal levels of transcription of silenced loci in part by controlling methylation in heterochromatic regions.	JMJ24	-0.382799600843861	3.86227127016261e-05
AT1G09070	SRC2 specifically binds the peptide PIEPPPHH, and moves from ER to a vacuole fraction where it gets internalized. Involved in Protein Storage Vacuole targeting. The mRNA is cell-to-cell mobile.	SRC2	-0.27898738576222	0.0107353308694158
AT1G09080	Heat shock protein 70 (Hsp 70) family protein;(source:Araport11)	BIP3	-1.44348524714139	0.0111648864012866
AT1G09130	ATP-dependent caseinolytic (Clp) protease/crotonase family protein;(source:Araport11)	NA	-0.39727606942185	7.91609658120085e-07
AT1G09160	Protein phosphatase 2C family protein;(source:Araport11)	NA	-0.502058132676498	1.91200802064877e-05
AT1G09170	P-loop nucleoside triphosphate hydrolases superfamily protein with CH (Calponin Homology) domain-containing protein;(source:Araport11)	NA	-0.875718117417521	0.0312374102050278
AT1G09180	A member of ARF-like GTPase family. A thaliana has 21 members, in two subfamilies, ARF and ARF-like (ARL) GTPases.	ATSAR1,ATSARA1A,SARA1A	-2.77685790558493	8.93983398505349e-06
AT1G09210	Encodes one of three Arabidopsis calreticulins.Post-transcriptionally regulates together with CRT1 VAMP721/722 levels under ER stress.	AtCRT1b,CRT1b,CRT2	-0.216625508109902	0.0243049887879184
AT1G09240	Encodes a nicotianamine synthase.	ATNAS3,NAS3	-1.4130567945899	0.00805878180532468
AT1G09250	basic helix-loop-helix (bHLH) DNA-binding superfamily protein;(source:Araport11)	AIF4	-0.351169028056022	0.0133294536910405
AT1G09300	Encodes a mitochondrial protease ICP55. Alters the stability of proteins by removal of a single amino acid from their sequence.	AtICP55	-0.42934366881862	0.0196843054042028
AT1G09310	ABA responsive trichome formation regulator.	NA	-0.539882740878803	3.37037592855967e-06
AT1G09340	Encodes CHLOROPLAST RNA BINDING (CRB), a putative RNA-binding protein. CRB is important for the proper functioning of the chloroplast. Mutations in CRB also affects the circadian system, altering the expression of both oscillator and output genes. The mRNA is cell-to-cell mobile.	CRB,CSP41B,HIP1.3	-3.07543434697554	0
AT1G09350	Predicted to encode a galactinol synthase	AtGolS3,GolS3	-1.30350136603891	0.000774273550536851
AT1G09390	GDSL-motif esterase/acyltransferase/lipase. Enzyme group with broad substrate specificity that may catalyze acyltransfer or hydrolase reactions with lipid and non-lipid substrates.	NA	-0.248661081119926	0.0363605230052089
AT1G09440	Protein kinase superfamily protein;(source:Araport11)	NA	-0.706657980373812	0.00730559760007187
AT1G09750	Eukaryotic aspartyl protease family protein;(source:Araport11)	NA	-0.446641268798979	7.72409947145281e-05
AT1G09760	U2 small nuclear ribonucleoprotein A;(source:Araport11)	U2A'	-0.309654573966824	0.00520802171848409
AT1G09780	Encodes a 2,3-biphosphoglycerate-independent phosphoglycerate mutase that is involved in pollen development and stomatal movement.	iPGAM1	-0.309383126064977	0.00062703020722162
AT1G09783	Natural antisense transcript overlaps with AT1G78130;(source:Araport11)	NA	-1.94173429575963	0.000617668960253935
AT1G09810	evolutionarily conserved C-terminal region 11;(source:Araport11)	ECT11	-0.468404717534353	0.0051794007635189
AT1G09820	Pentatricopeptide repeat (PPR-like) superfamily protein;(source:Araport11)	NA	-0.717422845441412	0.00148481686567765
AT1G09830	glycinamide ribonucleotide synthetase (GAR synthetase) that catalyzes the conversion of phosphoribosyl amine to phosphoribosyl glycineamide	PUR2	-0.259079698989669	0.0154032872825184
AT1G09850	Arabidopsis thaliana papain-like cysteine peptidase	XBCP3	-0.770648441934231	6.1349262721235e-13
AT1G09900	Pentatricopeptide repeat (PPR-like) superfamily protein;(source:Araport11)	NA	-0.800527302343527	5.62235584030682e-07
AT1G09980	Putative serine esterase family protein;(source:Araport11)	NA	-0.235424962393186	0.0042690552608545
AT1G10050	Encodes a putative glycosyl hydrolase family 10 protein (xylanase).	NA	-0.33206883739627	0.0122322843515877
AT1G10090	Early-responsive to dehydration stress protein (ERD4);(source:Araport11)	NA	-0.47330559599293	1.45019077460556e-07
AT1G10170	Encodes AtNFXL1, a homologue of the putative human transcription repressor NF-X1. Functions as a negative regulator of the trichothecene phytotoxin-induced defense response.	ATNFXL1,NFXL1	-1.38696902420078	4.271535197174e-10
AT1G10270	glutamine-rich protein 23;(source:Araport11)	GRP23	-0.894607089579712	9.97804543636683e-20
AT1G10280	Core-2/I-branching beta-1,6-N-acetylglucosaminyltransferase family protein;(source:Araport11)	NA	-0.431395730675918	0.00580467136069566
AT1G10310	encodes a NADPH-dependent pterin aldehyde reductase that accepts pterin aldehyde as well as dihydropterin aldehyde as substrates involved in metabolism and salvage of folate and its derivatives.	NA	-0.804583222998521	0.00300161211249516
AT1G10360	Encodes glutathione transferase belonging to the tau class of GSTs. Naming convention according to Wagner et al. (2002).	ATGSTU18,GST29,GSTU18	-1.23249902679099	1.09187124442003e-23
AT1G10370	Encodes GSTU17 (Glutathione S-Transferase U17). Functions as a negative component of stress-mediated signal transduction pathways in drought and salt stress responses.	ATGSTU17,ERD9,GST30,GST30B,GSTU17	-3.61245648633045	2.02187432432353e-158
[truncated: 5,153 more rows]
