# Supplementary material
Source: HighWire-hosted journal article supplement (doi:10.1101/rna.080738.125)
Supplement: S7_Data.xlsx [file S7_Data.xlsx]

## Sheet: Up
GeneID	Description	Aliases	Log2FC	AdjustPvalue
AT1G01010	NAC domain containing protein 1;(source:Araport11)	ANAC001,NAC001,NTL10	0.96794014181636	6.52310041583596e-12
AT1G01030	AP2/B3-like transcriptional factor family protein;(source:Araport11)	NGA3	0.476123390540978	0.0351236015650793
AT1G01040	Encodes a Dicer homolog. Dicer is a RNA helicase involved in microRNA processing. Mutations in this locus can result in embryo lethality. Embryo shape at seed maturity is globular-elongate. Other mutants convert the floral meristems to an indeterminate state, others yet show defects in ovule development. mRNA is expressed in all shoot tissues. DCL1 is able to produce miRNAs and siRNAs. The mRNA i…	ASU1,ATDCL1,CAF,DCL1,EMB60,EMB76,SIN1,SUS1	0.548557523141601	6.76565155961699e-11
AT1G01070	Encodes a plasma membrane-localized amino acid transporter likely involved in amino acid export in the developing seed.	UMAMIT28	0.759614430971762	1.85378135961591e-05
AT1G01110	Member of IQ67 (CaM binding) domain containing family.	IQD18	1.78216026178392	8.79117155588989e-13
AT1G01120	Encodes a condensing enzyme KCS1 (3-ketoacyl-CoA synthase 1) which is involved in the critical fatty acid elongation process in wax biosynthesis.	KCS1	0.449385098837409	4.81725086307672e-05
AT1G01200	RAB GTPase homolog A3;(source:Araport11)	ATRAB-A3,ATRABA3,RABA3	1.60143052505888	3.77244989923924e-06
AT1G01230	ORM1 is an ER localized orosomucoid-like protein involved in sphingolipid homeostasis.	AtORM1	0.663985057985079	8.70800690931829e-08
AT1G01240	transmembrane protein;(source:Araport11)	NA	0.872329315626471	0.00014769308005753
AT1G01260	bHLH13 interacts with JAZ proteins, and functions redundantly with bHLH3, bHLH14 and bHLH17 to negatively regulate jasmonate responses.	bHLH013,bHLH13,JAM2	0.954810452384387	6.30750691904562e-16
AT1G01300	Eukaryotic aspartyl protease family protein;(source:Araport11)	NA	0.614669167313983	1.36163361739772e-08
AT1G01355	Putative endonuclease or glycosyl hydrolase;(source:Araport11)	NA	2.45074775981618	0.0308305642700466
AT1G01380	ETC1 is involved in trichome and root hair patterning in Arabidopsis.	ETC1	1.69999258755668	0.00197317594308001
AT1G01390	Phosphatidylinositol 4-phosphate 5-kinase (PIP5K) enzyme family member.	NA	1.89209490117792	3.29719446395598e-63
AT1G01448	Natural antisense transcript overlaps with AT1G01450;(source:Araport11)	NA	0.445151219628393	0.000445951672321387
AT1G01480	a member of the 1-aminocyclopropane-1-carboxylate (ACC) synthase (S-adenosyl-L-methionine methylthioadenosine-lyase, EC 4.4.1.14) gene family, isolated from a flower-specific cDNA library.	ACS2,AT-ACC2	1.33464192274826	0.000247406823886133
AT1G01580	Encodes the low-iron-inducible ferric chelate reductase responsible for reduction of iron at the root surface. It is likely to be the major Fe(III) chelate reductase in Arabidopsis iron metabolism. Coordinately regulated with IRT1, the major transporter responsible for high-affinity iron uptake from the soil, at both transcriptional and posttranscriptional levels. Steady state mRNA levels are reg…	ATFRO2,FRD1,FRO2	4.77279865375097	1.52247101831706e-57
AT1G01600	Encodes a member of the CYP86A subfamily of cytochrome p450 genes. Expressed significantly at highest level in mature stems and flowers.	CYP86A4	2.81843840261673	4.49559710208604e-34
AT1G01620	a member of the plasma membrane intrinsic protein subfamily PIP1. localizes to the plasma membrane and exhibits water transport activity in Xenopus oocyte. expressed ubiquitously and protein level decreases slightly during leaf development. Involved redundantly with PIP1;1/2/4/5 in hydraulics and carbon fixation, regulates the expression of related genes that affect plant growth and development.	PIP1,PIP1C,TMP-B	1.09261699085634	3.74109048832322e-54
AT1G01640	Putative role in flower development. Comparison of SALK_011721C to Columbia wild type resulted in a trend toward earlier flowering in the mutant (P=0.1) (Stapleton and Woodruff 2009, personal communication).	NA	0.775790657666349	2.80019821601564e-05
AT1G01650	SIGNAL PEPTIDE PEPTIDASE-LIKE 4;(source:Araport11)	ATSPPL4,SPPL4	0.791771119643696	2.74197580205682e-14
AT1G01715	hypothetical protein;(source:Araport11)	NA	1.26983221486501	0.00621298471839465
AT1G01730	hypothetical protein;(source:Araport11)	NA	0.869947058829328	3.90311601745555e-15
AT1G01770	propionyl-CoA carboxylase;(source:Araport11)	NA	0.632004156582312	1.1899233238478e-10
AT1G01780	Encodes a member of the Arabidopsis LIM proteins: a family of actin bundlers with distinct expression patterns. WLIM1, WLIM2a, and WLIM2b are widely expressed, whereas PLIM2a, PLIM2b, and PLIM2c are predominantly expressed in pollen. Regulates actin cytoskeleton organization. The mRNA is cell-to-cell mobile.	PLIM2b	1.09424022439759	1.21224974589822e-22
AT1G01820	member of the peroxin11 (PEX11) gene family, integral to peroxisome membrane, controls peroxisome proliferation.	PEX11C	0.330876548604958	0.000167142733040866
AT1G01830	ARM repeat superfamily protein;(source:Araport11)	NA	0.531026442311888	0.00168065590896018
AT1G01900	Encodes AtSBT1.1, a subtilisin-like serine protease. Cleaves the phytosulfokine AtPSK4, a growth promoting peptide.	ATSBT1.1,SBTI1.1	1.12395924467415	7.78983649699675e-10
AT1G01930	zinc finger protein-like protein;(source:Araport11)	NA	0.420482860222171	0.00889274972462903
AT1G01950	Encodes a member of the armadillo/beta-catenin repeat kinesin motor family. Mutants have twisted roots due to abnormal cell file rotation; the phenotype is dependent on microtubules.	ARK2,AtKINUb	0.785161584922175	1.16091452026566e-11
AT1G01960	Encodes one of the functionally redundant ARF guanine-nucleotide exchange factors (ARF-GEFs). Functions as regulators of post-Golgi trafficking.	BIG3,EDA10	0.325404436323234	8.67655146810023e-07
AT1G02050	Chalcone and stilbene synthase family protein;(source:Araport11)	LAP6,PKSA	0.875972458947438	9.98390086789283e-05
AT1G02060	Tetratricopeptide repeat (TPR)-like superfamily protein;(source:Araport11)	NA	0.410292892738054	0.00454627743467148
AT1G02100	Leucine carboxyl methyltransferase;(source:Araport11)	LCMT1,SBI1	0.765653721592671	2.1764625350278e-13
AT1G02110	bZIP domain class transcription factor (DUF630 and DUF632);(source:Araport11)	NA	0.578737491863604	1.43100001937483e-06
AT1G02150	Tetratricopeptide repeat (TPR)-like superfamily protein;(source:Araport11)	NA	0.227005539092893	0.0117192460889055
AT1G02205	Expression of the CER1 gene associated with production of stem epicuticular wax and pollen fertility. Biochemical studies showed that cer1 mutants are blocked in the conversion of stem wax C30 aldehydes to C29 alkanes, and they also lack the secondary alcohols and ketones. These suggested the CER1 protein is an aldehyde decarbonylase, but the exact molecular function of this protein remains to be…	CER1,CER22	0.554728033619384	0.0219659355919407
AT1G02260	Divalent ion symporter;(source:Araport11)	NA	0.660094694407214	3.89368411314201e-08
AT1G02280	Encodes a GTP-binding GTP-ase. Component of the chloroplast protein import machinery. Required for import of POR B into plastids. Toc33 phosphorylation may not play an important role in vivo.	ATTOC33,PPI1,TOC33	1.38912128130004	4.68040090435377e-61
AT1G02300	Encodes a capase involved in stress induced cell death.	AtcathB1	0.686628770132546	1.28434080827065e-05
AT1G02305	Encodes a capase involved in stress induced cell death.	AtcathB2	0.870201777037083	9.98772905230844e-24
AT1G02360	Chitinase family protein;(source:Araport11)	NA	0.564578710015797	0.0197377464390019
AT1G02400	Encodes a gibberellin 2-oxidase that acts on C19 gibberellins but not C20 gibberellins.	ATGA2OX4,ATGA2OX6,DTA1,GA2OX6	3.11276115675712	7.81393519109458e-67
AT1G02420	Pentatricopeptide repeat (PPR) superfamily protein;(source:Araport11)	NA	0.728197396495805	0.0154114700465654
AT1G02460	Pectin lyase-like superfamily protein;(source:Araport11)	NA	1.47950797992399	4.15928375733746e-07
AT1G02500	encodes a S-adenosylmethionine synthetase. SAM1 is regulated by protein S-nitrosylation. The covalent binding of nitric oxide (NO) to the Cys114 residue inhibits the enzyme activity.	AtSAM1,MAT1,METK1,SAM-1,SAM1	0.348562806109874	2.37734680932897e-07
AT1G02520	Encodes an ATP-binding cassette (ABC) transporter. Expressed in the vascular tissue of primary stem. The mRNA is cell-to-cell mobile.	ABCB11,MDR8,PGP11	1.06424743096755	2.03729666230672e-06
AT1G02610	RING/FYVE/PHD zinc finger superfamily protein;(source:Araport11)	NA	0.831073209347919	0.0288614047246439
AT1G02620	Ras-related small GTP-binding family protein;(source:Araport11)	NA	2.62049977948289	0.00796033384098258
AT1G02630	Nucleoside transporter family protein;(source:Araport11)	NA	3.62656045691309	0.0243271785357608
AT1G02640	encodes a protein similar to a beta-xylosidase located in the extracellular matrix. This is a member of glycosyl hydrolase family 3 and has six other closely related members.	ATBXL2,BXL2	3.1682082401129	0
AT1G02660	PLIP2 is a glycerolipid A1 lipase with substrate preference for monogalactosyldiacylglycerol. Expression is induced by ABA.	PLIP2	1.53737684372175	4.69813142624633e-24
AT1G02680	Encodes a TBP-Associated Factor (TAF) that functions together with PRC2 in transcriptional regulation during seed development.	TAF13	0.617879919824673	0.0260944677273363
AT1G02740	MRG1 and MRG2 proteins act as readers of H3K4me3/H3K36me3 marked chromatin. They interact with each other as well as several other protein classes, to modulate the activity of flowering genes.	MRG2	0.982133380397128	0.00156313042953292
AT1G02780	Ribosomal protein L19e family protein;(source:Araport11)	emb2386	0.251773891237038	0.0265333374758249
AT1G02800	Encodes a protein with similarity to endo-1,4-b-glucanases and is a member of Glycoside Hydrolase Family 9. CEL2 is induced by nemotodes and is expressed in syncitia induced by Heterodera schachtii.May be involved in the development and function of syncitia.	ATCEL2,CEL2,CEL2	4.27056720054839	7.78319504382178e-95
AT1G02810	Plant invertase/pectin methylesterase inhibitor superfamily;(source:Araport11)	NA	1.21701392274366	4.3586522255909e-10
AT1G02816	pectinesterase (Protein of unknown function, DUF538);(source:Araport11)	NA	0.70134184888185	2.18288931057742e-07
AT1G02840	SR34/SR1 is a plant homologue of the human general/alternative splicing factor SF2/ASF. Barta et al (2010) have proposed a nomenclature for Serine/Arginine-Rich Protein Splicing Factors (SR proteins): Plant Cell. 2010, 22:2926.	At-SR34,ATSRP34,SR1,SR34,SRP34	1.59822251384509	1.64834190061782e-93
AT1G02890	AAA-type ATPase family protein;(source:Araport11)	NA	0.304547572710294	3.9120932191585e-05
AT1G02960	kinetochore protein;(source:Araport11)	NA	0.89004687617965	6.69980737904852e-08
AT1G03030	P-loop containing nucleoside triphosphate hydrolases superfamily protein;(source:Araport11)	NA	0.526538944793578	0.00237064550000646
AT1G03080	kinase interacting (KIP1-like) family protein;(source:Araport11)	NET1D	0.79675804486338	6.56804372671322e-28
AT1G03090	MCCA is the biotinylated subunit of the dimer MCCase, which is involved in leucine degradation. Both subunits are nuclear coded and the active enzyme is located in the mitochondrion.	MCCA	1.70809103933827	8.68497028170233e-89
AT1G03140	PRP18a is one of two paralogs (the other being PRP18b) which are highly similar to the step II splicing factors in yeast. Loss of function mutations show defects in alternative splicing, mostly intron retention events.	PRP18a	0.558816079808551	4.1219538707849e-09
AT1G03200	hypothetical protein;(source:Araport11)	NA	0.959553060977475	0.00833610233294551
AT1G03210	Phenazine biosynthesis PhzC/PhzF protein;(source:Araport11)	NA	1.12597182453455	2.31037675749304e-17
AT1G03230	Eukaryotic aspartyl protease family protein;(source:Araport11)	NA	0.632570336712182	4.4552072089014e-10
AT1G03290	ELKS/Rab6-interacting/CAST family protein;(source:Araport11)	NA	1.17973811672704	7.04542207981304e-22
AT1G03320	hypothetical protein;(source:Araport11)	NA	2.53408479898884	0.000114020012529177
AT1G03350	BSD domain-containing protein;(source:Araport11)	NA	0.535313994336049	1.58526776898299e-06
AT1G03365	RING/U-box superfamily protein;(source:Araport11)	NA	0.336869895877759	0.00746742514497688
AT1G03470	Encodes a member of the NET superfamily of proteins that potentially couples different membranes to the actin cytoskeleton in plant cells. It colocalizes with filamentous actin and is localized to the nuclear membrane and the vacuolar membrane.	NET3A	1.99004901513289	9.09341340820709e-06
AT1G03520	Core-2/I-branching beta-1,6-N-acetylglucosaminyltransferase family protein;(source:Araport11)	NA	0.602304321451075	7.92509438529041e-06
AT1G03550	Secretory carrier membrane protein (SCAMP) family protein;(source:Araport11)	AtSCAMP4,SCAMP4	0.608396872658685	3.2101438414061e-05
AT1G03590	Protein phosphatase 2C family protein;(source:Araport11)	NA	0.84357689821755	2.16084346935626e-11
AT1G03610	plant/protein (DUF789);(source:Araport11)	NA	0.491629280256439	3.03068452115909e-07
AT1G03620	ELMO/CED-12 family protein;(source:Araport11)	NA	0.873610888834688	0.0344939512523634
AT1G03750	switch 2;(source:Araport11)	CHR9	0.455504089620478	0.0177521168273416
AT1G03770	Encodes a nuclear localized protein with similarity to animal polycomb repressive core complex1 (PRC1) core component RING.Appears to function redundantly with ATRING1a, a close paralog. Both interact physically with CLF and LHP1 and appear to function together to repress class I KNOX gene expression.	ATRING1B,RING1B	0.938047180002488	0.00576909089528844
AT1G03790	Encodes SOMNUS (SOM), a nucleus-localized CCCH-type zinc finger protein. SOM negatively regulates light-dependent seed germination downstream of PIL5 (AT2G20180).	AtTZF4,SOM,TZF4	1.72046365874128	1.01621843385927e-34
AT1G03800	encodes a member of the ERF (ethylene response factor) subfamily B-1 of ERF/AP2 transcription factor family (ATERF-10). The protein contains one AP2 domain. There are 15 members in this subfamily including ATERF-3, ATERF-4, ATERF-7, and leafy petiole.	ATERF10,ERF10	1.57175607116691	0.0108015993059236
AT1G03870	fasciclin-like arabinogalactan-protein 9 (Fla9). Possibly involved in embryogenesis and seed development.	FLA9	1.15493418754191	2.97554161750712e-08
AT1G03900	member of NAP family, an heterogeneous subfamily of the ATP-binding Cassette (ABC) superfamily of membrane transporters. The NAPs proteins are characterized by having only one nucleotide-binding folds (NBFs) domain.	ABCI18,ATNAP4,NAP4	0.577899300076295	3.22136474144204e-13
AT1G03910	Encodes the Arabidopsis homolog of a conserved eukaryotic protein without known functional domains. The protein that localizes to nuclear speckles and colocalizes with known splicing proteins.	CTN	0.840196056392855	1.78808134831765e-12
AT1G03920	Ubiquitously expressed protein kinase.	NA	1.08386446983954	0.00312741756750148
AT1G04040	HAD superfamily, subfamily IIIB acid phosphatase;(source:Araport11)	NA	1.27209454746075	1.14633367824953e-24
AT1G04050	Encodes SUVR1, one of the four closely related Arabidopsis SUVR proteins that belong to the SU(VAR)3-9 subgroup of SET-domain proteins. Proteins containing the evolutionarily conserved SET domain are involved in regulation of eukaryotic gene expression and chromatin structure through their histone lysine methyltransferase (HMTase) activity. SUVR1, SUVR2 and SUVR4 proteins contain a novel domain a…	SDG13,SUVR1	0.979604713838426	0.000921309158663562
AT1G04080	Encodes a U1 small nuclear ribonucleoprotein (snRNP) factor involved in alternative splicing.	PRP39,PRP39a	0.201562530995725	0.0248814993057776
AT1G04120	encodes a high-affinity inositol hexakisphosphate transporter that plays a role in guard cell signaling and phytate storage. It is a member of MRP subfamily / ABC transporter subfamily C.	ABCC5,ATABCC5,ATMRP5,MRP5,MRP5	0.442845212555837	1.4505449706359e-09
AT1G04133	None;(source:Araport11)	NA	5.15510640680219	0.0012792572248149
AT1G04140	Transducin family protein / WD-40 repeat family protein;(source:Araport11)	NA	0.283724990305258	0.000313159936231773
AT1G04183	Natural antisense transcript overlaps with AT1G03410;(source:Araport11)	NA	0.343845033242589	0.0253251797661175
AT1G04240	SHY2/IAA3 regulates multiple auxin responses in roots. It is induced rapidly by IAA, and has been shown to be phosphorylated by oat phytochrome A in vitro.	IAA3,SHY2	1.80709344078303	1.75787166567636e-14
AT1G04250	Transcription regulator acting as repressor of auxin-inducible gene expression. Auxin-inducible AUX/IAA gene. Short-lived nuclear protein with four conserved domains. Domain III has homology to beta alpha alpha dimerization and DNA binding domains. Involved in auxin signaling and is a positive modulator of natural leaf senescence. Auxin induces the degradation of the protein in a dosage-dependent…	AtIAA17,AXR3,IAA17	1.65635162536722	7.5413074140867e-11
AT1G04270	Encodes cytosolic ribosomal protein S15.	RPS15	0.239649364284013	0.0017446249317811
AT1G04280	Encodes a mitochondrial CaM/Ca2+-dependent NAD+ kinase.	NA	0.694043961883473	1.85658210756534e-12
AT1G04300	Encodes MUSE13, a TRAF domain protein. Regulates the turnover of nucleotide-binding domain and leucine-rich repeat-containing (NLR) immune receptors SNC1 and RPS2. Loss of both MUSE13 and MUSE14 leads to enhanced pathogen resistance, NLR accumulation, and autoimmunity.In addition, MUSE13/14 physically interact with ATG6 and appear to regulate ATG6 ubiquitination and thus formation of autophagosom…	MUSE13,TRAF1b	0.678681889893106	9.53139785400171e-17
AT1G04310	encodes an ethylene receptor related to bacterial two-component histidine kinases.	ERS2	1.62657702416426	4.87287030354256e-46
AT1G04353	Natural antisense transcript overlaps with AT1G05230;(source:Araport11)	NA	1.92395946745844	0.00199158427481021
AT1G04390	BTB/POZ domain-containing protein;(source:Araport11)	NA	0.473533342946157	0.000217062512144997
AT1G04400	Blue light receptor mediating blue-light regulated cotyledon expansion and flowering time. Positive regulator of the flowering-time gene CONSTANS. This gene possesses a light-induced CNT2 N-terminal homodimerisation domain.Involved in blue-light induced stomatal opening. Involved in triggering chromatin decondensation. An 80-residue motif (NC80) is sufficient to confer CRY2's physiological functi…	AT-PHH1,ATCRY2,CRY2,FHA,PHH1	0.477752636996578	1.07690593747646e-11
AT1G04410	predicted to encode a cytosolic malate dehydrogenase.	c-NAD-MDH1	0.751124579214183	3.09613466550279e-22
AT1G04430	S-adenosyl-L-methionine-dependent methyltransferases superfamily protein;(source:Araport11)	NA	0.661717477306046	2.44791326354596e-16
AT1G04480	Ribosomal protein L14p/L23e family protein;(source:Araport11)	NA	0.39109738173184	0.000301409825430112
AT1G04610	Encodes a member of the YUC family that is expressed in the root apex and is ethylene inducible in the root.	YUC3	1.94091198262495	1.46356992494154e-14
AT1G04620	Encodes a 7-hydroxymethyl chlorophyll a reductase, an enzyme of the chlorophyll cycle that converts 7-hydroxymethyl chlorophyll a to chlorophyll a.	HCAR	1.00566874336686	6.63009526105748e-22
AT1G04630	GRIM-19 protein;(source:Araport11)	MEE4	1.08338085251283	2.29293352034931e-05
AT1G04680	Pectin lyase-like superfamily protein;(source:Araport11)	NA	1.06633087369659	1.79977776369849e-28
AT1G04690	potassium channel beta subunit 1;(source:Araport11)	KAB1,KV-BETA1	0.356632817051933	2.8608229484988e-05
AT1G04750	Encodes vesicle-associated membrane protein 7B (VAMP7B, or VAMP721). Required for cell plate formation.VAMP721 interacts with KAT1 and KC1 K+ channels, affects channel gating and suppresses the K+ current within the physiological voltage range. Post-transcriptionally regulated by CRT1/2 under ER stress.	AT_VAMP7B,ATVAMP721,VAMP721,VAMP7B	0.743301008109335	7.29910521986197e-13
AT1G04780	Ankyrin repeat family protein;(source:Araport11)	NA	0.57315134738736	3.14906845268191e-10
AT1G04790	RING/U-box superfamily protein;(source:Araport11)	NA	0.607615118776591	1.87505720844512e-06
AT1G04820	Encodes an alpha tubulin isoform that is expressed in roots, leaves and flowers.	TOR2,TUA4	0.337366634260597	0.000310415856708313
AT1G04830	Ypt/Rab-GAP domain of gyp1p superfamily protein;(source:Araport11)	NA	0.26218156220721	0.0334963026267105
AT1G04850	ubiquitin-associated (UBA)/TS-N domain-containing protein;(source:Araport11)	NA	0.397138386184858	2.28311559144528e-05
AT1G04910	O-fucosyltransferase family protein;(source:Araport11)	NA	0.509091495597828	9.00104828824481e-05
AT1G04933	Natural antisense transcript overlaps with AT1G12150;(source:Araport11)	NA	1.49668919154228	0.0398951582260286
AT1G04950	Encodes one of two Arabidopsis proteins with significant similarity to the histone fold TBP-associated factor TAF6. Mutants are embryo lethal and transmission of the mutant allele through the male gametophyte is significantly reduced. This is due to reduced pollen tube growth of the mutant.	ATTAF6,EMB2781,TAF6,TAFII59	0.291288345331477	0.0163542855360941
AT1G04985	triacylglycerol lipase-like protein;(source:Araport11)	NA	0.406916350278485	0.0224280801363809
AT1G05000	Encodes an atypical dual-speci&	AtPFA-DSP1,PFA-DSP1	0.841391434688133	1.32401639763593e-10
AT1G05020	ENTH/ANTH/VHS superfamily protein;(source:Araport11)	AP180,PICALM6	0.610172155248466	0.0487776342321121
AT1G05090	dentin sialophosphoprotein-like protein;(source:Araport11)	NA	0.993405178059372	2.28447980721414e-05
AT1G05120	Helicase protein with RING/U-box domain-containing protein;(source:Araport11)	NA	0.406768449147198	0.000517574035347705
AT1G05150	Calcium-binding tetratricopeptide family protein;(source:Araport11)	NA	0.99959620233374	1.03590195868408e-21
AT1G05160	Encodes an ent-kaurenoic acid hydroxylase, a member of the CYP88A cytochrome p450 family.	ATKAO1,CYP88A3,KAO1	0.354530416141156	0.0461599000380651
AT1G05163	Natural antisense transcript overlaps with AT1G15410;(source:Araport11)	NA	2.20954042090573	5.01685414889573e-13
AT1G05170	Galactosyltransferase family protein;(source:Araport11)	NA	0.741954900596691	1.27700385174869e-06
AT1G05205	hexokinase-1 protein;(source:Araport11)	NA	1.01969672081507	0.000297178140495147
AT1G05270	TraB family protein;(source:Araport11)	NA	1.08356257645246	9.94042369901128e-17
AT1G05350	NAD(P)-binding Rossmann-fold superfamily protein;(source:Araport11)	NA	0.782724470376608	5.28609257234541e-11
AT1G05360	KMS2 encode a endoplasmic reticulum protein involved in the early secretory pathway.	KMS2	0.413269932819443	0.000764696163503894
AT1G05380	Acyl-CoA N-acyltransferase with RING/FYVE/PHD-type zinc finger protein;(source:Araport11)	NA	0.477447261962913	2.72789907896929e-07
AT1G05410	CDPK adapter, putative (DUF1423);(source:Araport11)	NA	0.506144225860544	0.00240267685728545
AT1G05420	ovate family protein 12;(source:Araport11)	ATOFP12,OFP12	2.65843074374675	9.33800536476118e-06
AT1G05490	Involved in gene silencing. Locus-specific regulator of 24nt-siRNA expression, works together with CLSY1-4 as the master regulators of essentially all Pol-IV-dependent 24nt-siRNAs.	chr31,CLSY3	2.67883352230896	3.7555020321054e-14
AT1G05500	Encodes a endomembrane-localized synaptotagmin. Synaptotagmin family proteins are calcium sensors that regulate exocytosis in mammalian cells.	ATSYTE,NTMC2T2.1,NTMC2TYPE2.1,SYT5,SYTE	0.367530042104931	0.00209682751579191
AT1G05570	Encodes a callose synthase 1 catalytic subunit . Member of Glycosyltransferase Family- 48.	ATGSL06,ATGSL6,CALS1,GSL06,GSL6	0.661514821054207	1.34771263806174e-15
AT1G05600	Tetratricopeptide repeat (TPR)-like superfamily protein;(source:Araport11)	EMB3101	1.11550685241694	2.12676773331199e-06
AT1G05620	Encodes a cytosolic inosine nucleoside hydrolase. It forms a heterocomplex with NSH1 with almost two orders of magnitude higher catalytic efficiency for xanthosine hydrolysis than observed for NSH1 alone. Transcript levels for this gene are elevated in older leaves suggesting that it may play a role in purine catabolism during senescence.	NSH2,URH2	1.38045724831069	2.35131663553066e-12
AT1G05640	Ankyrin repeat family protein;(source:Araport11)	NA	1.10328311178014	0.000394152954944713
AT1G05660	Pectin lyase-like superfamily protein;(source:Araport11)	NA	1.72843860518718	1.96074298984296e-08
AT1G05720	selenoprotein family protein;(source:Araport11)	NA	0.954912393122863	0.000706391652973141
AT1G05750	Encodes a pentatricopeptide repeat protein required for editing of rpoA and clpP chloroplast transcripts.	CLB19,PDE247	0.397209557859742	0.0348538588402622
AT1G05767	Natural antisense transcript overlaps with AT1G22810;(source:Araport11)	NA	0.548869896618749	0.0096042763640052
AT1G05790	lipase class 3 family protein;(source:Araport11)	NA	0.259104800736241	0.0190988060751029
AT1G05805	basic helix-loop-helix (bHLH) DNA-binding superfamily protein;(source:Araport11)	AKS2	0.924980354901848	4.26389709136965e-14
AT1G05810	Rab GTPase-like A5A protein;(source:Araport11)	ARA,ARA-1,ATRAB11D,ATRABA5E,RABA5E	1.80331409647251	1.23651904034816e-26
AT1G05830	Encodes a homolog of trithorax, a histone-lysine N-methyltransferase. Paralog of ATX1. Unlike ATX1 which is involved in trimethylating of histone H3-mysine 4, ATX2 is involved in dimethylating of histone H3-lysine 4. ATX1 and ATX2 influence the expression of largely nonoverlapping gene sets. The expression pattern of ATX2 is also different from that of ATX1.	ATX2,SDG30	0.371245582949411	1.51929081988333e-05
AT1G05835	PhD finger protein.	NA	2.49170717333368	1.08763981449523e-44
AT1G05840	Eukaryotic aspartyl protease family protein;(source:Araport11)	NA	0.906748240913469	2.02512084838991e-22
AT1G05890	RING/U-box superfamily protein;(source:Araport11)	ARI5,ATARI5	1.16194632748632	7.877081561239e-50
AT1G05960	ARM repeat superfamily protein;(source:Araport11)	NA	0.403513749230014	3.0879255272366e-07
AT1G05970	Anti-silencing factor. Forms a complex with ASI1-EDM2 that is required for expression of some nonintronic HC-TRE genes	AIPP1,EDM3	0.540799164660881	0.00402683849624313
AT1G06010	basic leucine zipper/W2 domain protein;(source:Araport11)	NA	0.62349710556967	0.0188891398508677
AT1G06070	Basic-leucine zipper (bZIP) transcription factor family protein;(source:Araport11)	bZIP69	1.12716875794327	2.42884852232468e-27
AT1G06080	Encodes a protein homologous to delta 9 acyl-lipid desaturases of cyanobacteria and acyl-CoA desaturases of yeast and mammals. expression down-regulated by cold temperature. It is involved in the desaturation of VLCFAs to make monounsaturated VLCFAs.	ADS1,AtADS1	3.71866799262047	5.50860487005843e-179
AT1G06090	Membrane bound acyl-lipid desaturases which can perform &	NA	0.72015255695429	0.000231553802962896
AT1G06110	SKP1/ASK-interacting protein 16;(source:Araport11)	SKIP16	0.852508271976517	2.00115459107715e-25
AT1G06120	Membrane bound acyl-lipid desaturases which can perform &	NA	1.97398462832862	6.87868072761722e-09
AT1G06150	Encodes a LHW-like protein with 79% amino acid identity to LHW.	EMB1444,LHL1	0.340096973876657	0.00369356549904784
AT1G06200	Peptidase S24/S26A/S26B/S26C family protein;(source:Araport11)	NA	0.566691357190001	4.57011840424365e-05
AT1G06210	Encodes a member of the Arabidopsis TOL (TOM1-LIKE) family of ubiquitin binding proteins that acts redundantly in the recognition and further endocytic sorting of a PIN-FORMED (PIN)-type auxin carrier protein at the plasma membrane, modulating dynamic auxin distribution and associated growth responses.	NA	0.852199664748477	0.000482802065294605
AT1G06230	This gene is predicted to encode a bromodomain-containing protein. Plant lines expressing RNAi constructs targeted against GTE4 show some resistance to agrobacterium-mediated root transformation.	GTE4	0.258122006583836	0.00151447662191984
AT1G06250	alpha/beta-Hydrolases superfamily protein;(source:Araport11)	NA	5.05659735877501	0.000341195997046289
AT1G06265	Natural antisense transcript overlaps with AT1G06260;(source:Araport11)	NA	1.91631170003651	1.28192329958939e-41
AT1G06310	Encodes a putative acyl-CoA oxidase. However, no transcripts have been detected for this gene and no altered phenotypes have been detected in plants mutant for this gene. This suggests that ACX6 does not significantly contribute to seedling beta-oxidation of fatty acids or indole-3-butyric acid in vivo.	ACX6	1.716533043809	0.00814553361631945
AT1G06350	Fatty acid desaturase family protein;(source:Araport11)	ADS4,AtADS4	2.76376487643001	8.49983901662784e-19
AT1G06360	ADS4.2 has strong desaturase activity on acyl-CoA substrates longer than C32 and &	NA	0.304262405565694	0.0107175264944369
AT1G06410	Encodes an enzyme putatively involved in trehalose biosynthesis. Though the protein has both trehalose-6-phosphate synthase (TPS)-like and trehalose-6-phosphate phosphatase (TPP)-like domains, neither activity has been detected in enzymatic assays nor has the protein been able to complement yeast TPS or TPP mutants.	ATTPS7,ATTPSA,TPS7,TPS7	0.344079013151502	6.2869976910934e-05
AT1G06463	None;(source:Araport11)	NA	2.87173480336035	1.36229050115026e-16
AT1G06473	None;(source:Araport11)	NA	2.41515900540102	0.00207147797570156
AT1G06490	Encodes Callose Synthase 7 (CalS7), a phloem-specific callose synthase responsible for callose deposition in developing sieve elements during phloem formation and in mature phloem induced by wounding.	ATGSL07,atgsl7,CalS7,gsl07,GSL07,GSL7	0.568192811373506	8.00538236988944e-07
AT1G06520	sn-glycerol-3-phosphate 2-O-acyltransferase. Expressed in flower buds and siliques. Homozygous mutant plants are male sterile.	ATGPAT1,GPAT1,sn-2-GPAT1	1.3897580823183	0.0003966602052379
AT1G06530	Encodes PEROXISOMAL AND MITOCHONDRIAL DIVISION FACTOR2. Involved in mitochondrial morphogenesis.	PMD2	0.542926971013855	0.000213142149729642
AT1G06570	Mutation of the PDS1 locus disrupts the activity of p-hydroxyphenylpyruvate dioxygenase (HPPDase), the first committed step in the synthesis of both plastoquinone and tocopherols in plants.	HPD,HPPD,PDS1	0.900038869912483	2.88061291795319e-21
AT1G06620	encodes a protein whose sequence is similar to a 2-oxoglutarate-dependent dioxygenase The mRNA is cell-to-cell mobile.	NA	0.917377269765844	2.34359621861863e-10
AT1G06700	Protein kinase superfamily protein;(source:Araport11)	NA	1.13852965676624	1.31610296259478e-43
AT1G06760	winged-helix DNA-binding transcription factor family protein;(source:Araport11)	H1.1	0.431414135111604	4.69311831719036e-07
AT1G06800	Encodes a lipase that hydrolyzes phosphatidylcholine, glycolipids as well as triacylglycerols.	DALL4,PLA-I{gamma}1	0.661371843647307	3.96314549104661e-05
AT1G06840	Homomultimers interact with cytoplasmic signaling molecule PBL27, resulting in herbivory resistance, in an ethylene-dependent manner.	NA	0.355000617732674	0.000527019063709653
AT1G06850	bZIP protein involved in heat stress response. Under heat stress localization moves exclusively to nucleus.	AtbZIP52,bZIP52	0.620192257426063	2.55986326612112e-05
AT1G06900	Insulinase (Peptidase family M16) family protein;(source:Araport11)	NA	0.502949617540697	5.16913735547785e-10
AT1G06980	PADRE protein	NA	1.96475458298144	2.20284244394302e-20
AT1G07000	A member of EXO70 gene family, putative exocyst subunits, conserved in land plants. Arabidopsis thaliana contains 23 putative EXO70 genes, which can be classified into eight clusters on the phylogenetic tree.	ATEXO70B2,EXO70B2	0.712175196835436	2.33080220519451e-06
AT1G07040	plant/protein;(source:Araport11)	NA	0.882783151955449	8.27484340960708e-23
AT1G07050	FITNESS encodes a protein with a single CCT domain and belongs to the CCT motif family genes (CMF). FITNESS acts upstream JUB1 thereby controlling H2O2 levels. FITNESS has a role in cellular redox homeostasis controlling H2O2 levels, due to changes in enzymes, metabolites and transcripts related to ROS detoxification.	FITNESS	1.37321128127303	0.00406516678170162
AT1G07090	LIGHT-DEPENDENT SHORT HYPOCOTYLS-like protein (DUF640);(source:Araport11)	LSH6	1.27601275370048	2.77548960539773e-16
AT1G07140	Encodes a putative Ran-binding protein (siRanBP).	SIRANBP	0.323818252547998	0.0200998850021886
AT1G07230	non-specific phospholipase C1;(source:Araport11)	NPC1	0.679607038717727	1.85040124070174e-13
AT1G07240	Encodes a UDP-glucosyltransferase that plays a role in abscisic acid (ABA) glucosylation from ABA to ABA-glucose ester and regulates ABA homeostasis, thereby influencing the ABA signal network.	UGT71C5	1.04885804437393	2.41276154485488e-20
AT1G07260	Encodes a uridine diphosphate-glycosyltransferase that acts on methyl salicylate (MeSA) to form MeSA glucosides in vitro and in vivo and facilitates negative regulation of the SAR response by modulating homeostasis of MeSA and SA.	UGT71C3	0.752865819642046	0.000786773549656257
AT1G07340	sugar transporter 2;(source:Araport11)	ATSTP2,STP2	4.67311081240883	0.00662061313060257
AT1G07380	Encodes a neutral ceramidase that is involved in sphingolipid homeostasis and responses to oxidative stress.	AtNCER1	0.798334584327619	1.22350258654678e-11
AT1G07440	NAD(P)-binding Rossmann-fold superfamily protein;(source:Araport11)	NA	0.66628986613883	4.82608502318196e-10
AT1G07480	Transcription factor IIA, alpha/beta subunit;(source:Araport11)	NA	0.348465993865983	0.00012201917241753
AT1G07520	GRAS family transcription factor;(source:Araport11)	NA	0.724720516546911	5.54201985041862e-08
AT1G07530	Encodes a member of the GRAS family of transcription factors. The protein interacts with the TGA2 transcription factor and affects the transcription of stress-responsive genes. The protein is found in the nucleus and is also exported to the cytoplasm.	ATGRAS2,GRAS2,SCL14	0.324445931347515	1.20421237572733e-05
AT1G07560	Leucine-rich repeat protein kinase family protein;(source:Araport11)	NA	0.780093582207351	0.00327182337587708
AT1G07570	Protein kinase capable of phosphorylating tyrosine, serine, and threonine residues	APK1,APK1A	0.934306945633915	8.63006557817509e-16
AT1G07630	Encodes a protein phosphatase 2C like gene, similar to POL. Involved in leaf development. Knockout mutants have abnormally shaped leaves.	PLL5	0.341596917424488	0.00271524544574494
AT1G07650	Leucine-rich repeat receptor-like kinase with extracellular malectin-like domain, which possesses cell death induction activity in plant leaves.	NA	0.554764944548746	1.09917734140228e-11
AT1G07660	Histone superfamily protein;(source:Araport11)	NA	0.707642676186805	0.00556115236182513
AT1G07670	TPLATE complex protein involved in clathrin-mediated endocytosis.	ATECA4,ECA4	0.339591894182202	1.83079781833758e-05
AT1G07690	transmembrane protein;(source:Araport11)	NA	3.05610888865842	8.92604195315592e-05
AT1G07728	Natural antisense transcript overlaps with AT1G07725;(source:Araport11)	NA	0.505132851219011	7.92900572281117e-06
AT1G07730	Disease resistance-responsive (dirigent-like protein) family protein;(source:Araport11)	NA	5.66353606505936	4.047821835079e-16
AT1G07745	Is a suppressor of SNI1. Encodes a member of the RecA/RAD51 family of DNA recombination and repair proteins. Both RAD51 and SNI1 have a dual role in pathogen-related gene transcription and somatic homologous recombination.	ATRAD51D,RAD51D,SSN1	0.807306808514968	0.00202790136450538
AT1G07750	RmlC-like cupins superfamily protein;(source:Araport11)	NA	1.06042604198839	6.03467409416219e-27
AT1G07770	Encodes cytoplasmic ribosomal protein S15a.	RPS15A	0.77822133994893	1.2580197521142e-24
AT1G07810	Encodes an ER-type Ca2+-pumping ATPase. The mRNA is cell-to-cell mobile.	ACA3,ATECA1,ECA1	0.376785546768458	1.3131609567522e-06
AT1G07820	Histone superfamily protein;(source:Araport11)	NA	0.768594318334621	0.00818276745465104
AT1G07830	ribosomal protein L29 family protein;(source:Araport11)	NA	0.853445841007699	2.54129409491292e-07
AT1G07960	Encodes a protein disulfide isomerase-like (PDIL) protein, a member of a multigene family within the thioredoxin (TRX) superfamily.	ATPDIL5-1,PDIL5-1	0.938915288364803	1.01314701532486e-05
AT1G07985	Expressed protein;(source:Araport11)	NA	2.43525303698505	7.34890669891135e-11
AT1G08030	Encodes a tyrosylprotein sulfotransferase (TPST). This protein is a 500-aa type I transmembrane protein that shows no sequence similarity to animal TPSTs. Activity confirmed by protein expression in yeast. TPST is expressed throughout the plant body, and the highest levels of expression are in the root apical meristem. TPST acts in the auxin pathway to maintain postembryonic root stem cell niche …	AQC1,HPS7,TPST	0.63791487685201	1.9924445948819e-06
AT1G08050	Zinc finger (C3HC4-type RING finger) family protein;(source:Araport11)	NA	0.340057810283329	0.0357887965380164
AT1G08125	S-adenosyl-L-methionine-dependent methyltransferases superfamily protein;(source:Araport11)	NA	1.10055066474552	2.99515788081748e-05
AT1G08210	Eukaryotic aspartyl protease family protein;(source:Araport11)	NA	0.786684958205442	7.77878224118774e-10
AT1G08230	Codes for a H+-driven, high affinity gamma-aminobutyric acid (GABA) transporter. Localized at the plasma membrane. In planta, AtGAT1 expression was highest in flowers and under conditions of elevated GABA concentrations such as wounding or senescence.	NA	0.426718992236045	0.0132257958800834
AT1G08273	Natural antisense transcript overlaps with AT1G59850;(source:Araport11)	NA	2.26349114168437	0.00553909424118647
AT1G08310	alpha/beta-Hydrolases superfamily protein;(source:Araport11)	NA	0.974223076087666	0.0207829381197816
AT1G08320	bZIP transcription factor family protein;(source:Araport11)	bZIP21,TGA9	0.527708109578599	3.38502275167894e-05
AT1G08450	Encodes one of three Arabidopsis calreticulins. In CRT-deficient mouse fibroblasts, this protein restores ER Ca2+ levels. Non-receptor component required for EFR-mediated immunity. Mutants show de-repressed anthocyanin accumulation in the presence of elf18, and EFR accumulation and signalling.	AtCRT3,CRT3,EBS2,PSL1	0.452027043548699	0.0028152425201574
AT1G08460	histone deacetylase 8;(source:Araport11)	ATHDA8,HDA08,HDA8	0.423347139127638	3.73122567924188e-05
AT1G08480	Encodes subunit 6 of mitochondrial complex II (succinate dehydrogenase complex) and participates in the respiratory chain. It contributes to anchoring succinate dehydrogenase to the inner mitochondrial membrane. The mRNA is cell-to-cell mobile.	SDH6	0.312305862163892	0.0134914378404649
AT1G08500	early nodulin-like protein 18;(source:Araport11)	AtENODL18,ENODL18	2.97115379894323	1.09554444539212e-37
AT1G08510	Encodes an acyl-acyl carrier protein thioesterase. Hydrolyzes primarily saturated acyl-ACPs with chain lengths that vary between 8 and 18 carbons. Involved in saturated fatty acid synthesis. Nuclear-encoded, plastid-targeted globular protein that is functional as dimer.	FATB	0.32469558875844	0.00180716212723999
AT1G08590	Encodes one of the two putative eLRR kinase closely related to PXY (At1g08590/PXL1 and At4g28650/PXL2). Insertion mutants in either pxl1 or pxl2 do not exhibit an obvious phenotype in the stem; double-mutant combinations of a Col allele, of pxy (pxy-3) with pxl1 and pxl2, generate a more severe vascular phenotype than pxy-3 alone, suggesting that these genes act synergistically with PXY in regula…	ATPXL1,PXL1	1.94059765239118	1.07306299087746e-68
AT1G08592	Natural antisense transcript overlaps with AT1G08590;(source:Araport11)	NA	0.334014682668978	0.0278246726883729
AT1G08600	The Arabidopsis ATRX harbours a N-terminal ADD domain and a C-terminal helicase domain and is devoid of the large central region involved in DAXX interaction in mammals. Arabidopsis ATRX mutant alleles are viable, but with reduced fertility. Their combination with mutants for the H3.3 chaperone HIRA impairs plant survival. ATRX loss affects cellular histone H3.3 pools and modulates the H3.1/H3.3 …	ATRX,CHR20	0.431220438287718	0.000501533218991566
AT1G08630	Encodes a threonine aldolase, involved in threonine degradation to glycine. Primarily expressed in seeds and seedlings.	THA1	2.08749724232458	2.10904963707587e-25
AT1G08660	Encodes a sialyltransferase-like protein that is localized to the Golgi apparatus and is involved in pollen tube growth and pollen germination.	MGP2,SIA1	1.02041506781569	9.93213403924037e-26
AT1G08760	CORD2 is a member of a novel and plant specific family of microtubule associated proteins. CORD1 binds microtubules via a conserved protein domain shared among family members. CORD functions may overlap;cord1 / cord2 mutants have defects in secondary cell wall pit morphology.	CORD2	0.431997724359808	9.4033501814931e-06
AT1G08810	putative transcription factor of the R2R3-MYB gene family. Transcript increases under conditions that promote stomatal opening (white and blue light, abi1-1 mutation) and decreases under conditions that trigger stomatal closure (ABA, desiccation, darkness), with the exception of elevated CO2. Expressed exclusively in guard cells of all tissues. It is required for light-induced opening of stomata.…	AtMYB60,MYB60	1.49016759290192	0.0190572636571943
AT1G08820	Encodes VAP33-like protein that interacts with cowpea mosaic virus protein 60K. Is a SNARE-like protein that may be involved in vesicular transport to or from the ER.	VAP27-2	0.391004108600254	7.20240908024742e-05
AT1G08890	Major facilitator superfamily protein;(source:Araport11)	NA	0.933751142955521	8.51143819253057e-10
AT1G08900	Major facilitator superfamily protein;(source:Araport11)	NA	1.38893711721736	1.43576639329374e-28
AT1G08920	Encodes ESL1, a transporter for monosaccharides.	ESL1	0.353735591114298	0.00185487654997917
AT1G08930	encodes a putative sucrose transporter whose gene expression is induced by dehydration and cold. The mRNA is cell-to-cell mobile.	ERD6	0.474513122943874	4.29001732060363e-08
AT1G08980	Encodes an enzyme with similarity to bacterial acylamidohydrolases and exhibits indole-3-acetamide amidohydrolase activity in vitro. This enzyme may be involved in the in vivo biosynthesis of indole-acetic acid from indole-3-acetamide, a native metabolite of A. thaliana. It appears to exist as a monomer.	AMI1,ATAMI1,ATTOC64-I,TOC64-I	1.55211074444422	8.25270122312855e-59
AT1G09010	glycoside hydrolase family 2 protein;(source:Araport11)	NA	0.81429241639077	5.40405754428437e-23
AT1G09070	SRC2 specifically binds the peptide PIEPPPHH, and moves from ER to a vacuole fraction where it gets internalized. Involved in Protein Storage Vacuole targeting. The mRNA is cell-to-cell mobile.	SRC2	0.359231776304429	0.000813501819941025
AT1G09090	NADPH-oxidase AtrbohB plays a role in seed after-ripening. Major producer of superoxide in germinating seeds. AtrbohB pre-mRNA is alternatively spliced in seeds in a hormonally and developmentally regulated manner. ABA caused accumulation of AtrbohB-? mRNA and prevented prevented AtrbohB-a mRNA expression in fresh seeds.	ATRBOHB,ATRBOHB-BETA,RBOHB	0.97225379770164	1.26609488261943e-09
AT1G09140	Encodes a serine-arginine rich RNA binding protein involved in regulation of splicing (including splicing of itself). Exists as 3 alternative spliced forms that are differentially expressed. AT1G09140.1 predominantly accumulates in the cytosol in light grown plants.Barta et al (2010) have proposed a nomenclature for Serine/Arginine-Rich Protein Splicing Factors (SR proteins): Plant Cell. 2010, 22…	At-SR30,ATSRP30,SR30	0.356326039430628	2.61519992162194e-05
AT1G09195	Ppx-GppA phosphatase;(source:Araport11)	NA	1.40682647549267	2.05831515004383e-11
AT1G09230	Encodes a U12-type spliceosomal protein that is an indispensible component of the minor spliceosome and plays a crucial role in U12 intron splicing and plant development.	U11/U12-65K	0.333584239478352	0.0218540309793963
AT1G09270	Protein interacts with Agrobacterium proteins VirD2 and VirE2.	IMPA-4	0.818360878842465	5.39793154979275e-21
AT1G09280	rhodanese-like domain protein;(source:Araport11)	NA	1.41079658701922	6.97114300821635e-41
AT1G09420	Encodes a protein similar to glucose-6-phosphate dehydrogenase but, based on amino acid differences in the active site and lack of activity, does not encode a functional G6PDH. The amino acid sequence for the consensus sequence of the G6PDH active site (DHYLGKE) differs in three places in this protein. gc exon splice site at 20574 is based on protein alignment, and is not confirmed experimentally.	G6PD4	0.642010736271315	1.8952104801081e-05
AT1G09430	Encodes subunit A of the heteromeric enzyme ATP citrate lyase (ACL). In animals, ACL is encoded by a single gene; ACL in Arabidopsis is composed of two polypeptides, ACLA (encoded by 3 genes) and ACLB (encoded by 2 genes). The holoenzyme has an A(4)B(4)stoichiometry. Expression of both ACLA and ACLB but not of either of the subunits alone results in ACL activity.	ACLA-3	0.852165321785951	4.13648743458487e-29
AT1G09460	Carbohydrate-binding X8 domain superfamily protein;(source:Araport11)	NA	1.07947744023055	3.65559862245431e-21
AT1G09530	Transcription factor interacting with photoreceptors phyA and phyB. Forms a ternary complex in vitro with G-box element of the promoters of LHY, CCA1. Acts as a negative regulator of phyB signalling. It degrades rapidly after irradiation of dark grown seedlings in a process controlled by phytochromes. Does not play a significant role in controlling light input and function of the circadian clockw…	PAP3,PIF3	1.83909879319836	1.10150720576376e-97
AT1G09540	Encodes putative transcription factor. Mutants lack of mucilage extrusion from the seeds during imbibition. Reduced quantities of mucilage are deposited during the development of the seed coat epidermis in myb61 mutants. Expressed in guard cells,loss of function mutations show an increase in stomatal pore opening suggesting a role in ABA independent regulation of stomatal pore size.	ATMYB61,MYB61	1.46524791449024	0.000140030900651209
AT1G09570	Light-labile cytoplasmic red/far-red light photoreceptor involved in the regulation of photomorphogenesis. It exists in two inter-convertible forms: Pr and Pfr (active) and functions as a dimer.The N terminus carries a single tetrapyrrole chromophore, and the C terminus is involved in dimerization. It is the sole photoreceptor mediating the FR high irradiance response (HIR). Major regulator in re…	FHY2,FRE1,HY8,PHYA	3.06839526109645	0
AT1G09575	Mitochondrial calcium channel.	MCU1	2.3819868359415	1.97742009307143e-19
AT1G09620	ATP binding/leucine-tRNA ligases/aminoacyl-tRNA ligase;(source:Araport11)	NA	0.189507539844087	0.0199866263754316
AT1G09630	Encodes a putative GTP-binding protein. Associates with organelles on a pathway from the Golgi to the plasma membrane in interphase. In dividing cells acts at the cell plate.	ATRAB-A2A,ATRAB11C,ATRABA2A,RAB-A2A,RAB11c	0.684605502574803	0.010303509921284
AT1G09640	Translation elongation factor EF1B, gamma chain;(source:Araport11)	NA	0.318844649083579	1.08194974567315e-06
AT1G09710	Paralog of DRMY1 with unknown function.	DP1	0.694062269371079	2.45711502373292e-06
AT1G09730	Encodes a SUMO protease that positively regulates the transition to flowering in long and short days. Along with SPF2, its activity is required for fertility as asp1/spf2 double mutants have defects in gametogenesis and embroygenesis.	ASP1,SPF1	0.312221303475331	0.000212176798629728
AT1G09770	Member of MYB3R- and R2R3- type MYB- encoding genes. Essential for plant innate immunity. Interacts with MOS4 and PRL1. The mRNA is cell-to-cell mobile.	ATCDC5,ATMYBCDC5,CDC5	1.25462966157345	1.18355909126866e-38
AT1G09780	Encodes a 2,3-biphosphoglycerate-independent phosphoglycerate mutase that is involved in pollen development and stomatal movement.	iPGAM1	0.535743916517623	1.3696602286823e-09
AT1G09860	Member of a family of proteins related to PUP1, a purine transporter. May be involved in the transport of purine and purine derivatives such as cytokinins, across the plasma membrane.	ATPUP16,PUP16	3.80076271208584	0.000202569490982877
AT1G09863	Natural antisense transcript overlaps with AT1G79510;(source:Araport11)	NA	0.956860586053669	0.00531870047811703
AT1G09910	Rhamnogalacturonate lyase family protein;(source:Araport11)	NA	1.16935464142897	6.73826944197475e-24
AT1G09930	oligopeptide transporter	ATOPT2,OPT2	2.53941185105604	0.0111306047635199
AT1G09940	Encodes glutamyl-tRNA reductase. Involved in heme biosynthesis in non-photosynthetic tissues and induced by oxidative stress in photosynthetic tissues to supply heme for defensive hemoproteins	HEMA2	0.347696932269208	0.000750282873134952
AT1G09960	low affinity (10mM) sucrose transporter in sieve elements (phloem)	ATSUC4,ATSUT4,SUC4,SUT4	0.704037522847441	3.16817526835952e-06
AT1G09980	Putative serine esterase family protein;(source:Araport11)	NA	0.175811221815365	0.0428740957021155
AT1G10040	alpha/beta-Hydrolases superfamily protein;(source:Araport11)	NA	1.1051952462168	0.00017374947085192
AT1G10070	Encodes a chloroplast branched-chain amino acid aminotransferase. Complements the yeast leu/iso-leu/val auxotrophy mutant. Involved in cell wall development.	ATBCAT-2,BCAT-2,BCAT2	3.230471882488	3.11692874038354e-188
AT1G10095	Protein prenylyltransferase superfamily protein;(source:Araport11)	NA	0.569219043464413	0.00981348167513325
AT1G10120	basic helix-loop-helix (bHLH) DNA-binding superfamily protein;(source:Araport11)	CIB4	0.824719348924427	7.48693453638644e-17
AT1G10130	Encodes a golgi localized P2A-type Ca2+ ATPase involved in Mn nutrition and homeostasis.	ATECA3,ECA3	0.409732407358969	2.44463825838021e-06
AT1G10140	Uncharacterized conserved protein UCP031279;(source:Araport11)	NA	0.659542312383795	1.55063853601853e-08
AT1G10150	Carbohydrate-binding protein;(source:Araport11)	NA	0.397290046382936	0.00132777376745901
AT1G10200	Encodes a member of the Arabidopsis LIM proteins: a family of actin bundlers with distinct expression patterns. WLIM1, WLIM2a, and WLIM2b are widely expressed, whereas PLIM2a, PLIM2b, and PLIM2c are predominantly expressed in pollen. Regulates actin cytoskeleton organization.	AtWLIM1,WLIM1	0.815865306214805	7.28358764113118e-13
AT1G10210	Encodes ATMPK1. Kinase is activated by wounding.	ATMPK1,MPK1	0.911116820618796	3.48452400542567e-13
AT1G10340	Ankyrin repeat family protein;(source:Araport11)	NA	1.36883146451686	2.08921513629911e-06
AT1G10400	UDP-Glycosyltransferase superfamily protein;(source:Araport11)	NA	1.24094529635552	0.00094417034994208
AT1G10410	CW14 protein (DUF1336);(source:Araport11)	NA	0.494064679463719	1.41806762423133e-05
AT1G10430	Encodes one of the isoforms of the catalytic subunit of protein phosphatase 2A: AT1G59830/PP2A-1, AT1G10430/PP2A-2, At2g42500/PP2A-3, At3g58500/PP2A-4 [Plant Molecular Biology (1993) 21:475-485 and (1994) 26:523-528; Note that in more recent publications, there is mixed use of gene names for PP2A-3 and PP2A-4 - some refer to At2g42500 as PP2A-3 and some as PP2A-4]. It regulates the activation of …	PP2A-2	0.29428109374653	0.00859211493911682
AT1G10450	Encodes SIN3-like 6, a homolog of the transcriptional repressor SIN3 (AT1G24190).	SNL6	0.408954436524005	1.71783376621098e-05
AT1G10550	Encodes a membrane-localized protein that is predicted to function during cell wall modification.Overexpression of XTH33 results in abnormal cell morphology. It's expression is under epigenetic control by ATX1.	XET,XTH33	2.68790274692105	3.01596428417403e-37
AT1G10560	Encodes a protein containing a UND, a U-box, and an ARM domain. This protein has E3 ubiquitin ligase activity based on in vitro assays.	ATPUB18,PUB18	2.60667666283673	1.42886910142747e-12
AT1G10570	Encodes a deSUMOylating enzyme. In vitro it has both peptidase activity and isopeptidase activity: it can cleave the C-terminal residues from SUMO to activate it for attachment to a target protein and it can also act on the isopeptide bond between SUMO and another protein. sYFP:OTS2 protein accumulates in nuclei in a punctate pattern. Double mutant analysis with ULP1D/OTS1 indicates that these ge…	OTS2,ULP1C	1.17049537029165	2.64047644175219e-15
AT1G10580	Transducin/WD40 repeat-like superfamily protein;(source:Araport11)	NA	0.473090737986268	9.14709172385401e-05
AT1G10590	Nucleic acid-binding, OB-fold-like protein;(source:Araport11)	NA	0.753451156826937	5.57492508956792e-19
AT1G10610	basic helix-loop-helix (bHLH) DNA-binding superfamily protein;(source:Araport11)	NA	0.818991112894377	1.80361090421573e-05
AT1G10630	A member of ARF GTPase family. A thaliana has 21 members of this family, known to be essential for vesicle coating and uncoating and functions in GTP-binding. Gene encoding ADP-ribosylation factor and similar to other ARFs and ARF-like proteins. The gene is shown to play a role in cell division, cell expansion and cellulose production using antisense construct.	ARFA1F,ATARFA1F	0.376155166477779	0.000147849949002186
AT1G10720	BSD domain-containing protein;(source:Araport11)	NA	0.504297826976746	0.000767004412655762
AT1G10730	Clathrin adaptor complexes medium subunit family protein;(source:Araport11)	AP1M1	0.597230777388451	0.00254238309190716
AT1G10840	Encodes eukaryotic initiation factor 3H1 subunit (TIF3H1).	TIF3H1	0.746825884663042	4.01983252933643e-17
AT1G10870	A member of ARF GAP domain (AGD), A thaliana has 15 members, grouped into four classes. AGD4 belongs to the Class 1, together with AGD1, AGD2, and AGD3.	AGD4	0.266886208106127	0.0311620750439202
AT1G10890	arginine/glutamate-rich 1 protein;(source:Araport11)	NA	0.951319797264858	4.03276953480179e-14
AT1G10910	Member of the P subfamily of PRR proteins. Loss of function results in defects in abnormal plastid RNA edit and chloroplast biogenesis	EMB3103,PDM2	0.466112622984958	7.22235445073407e-06
AT1G10940	Encodes a plant protein kinase similar to the calcium/calmodulin-dependent protein kinase subfamily and the SNF1 kinase subfamily (SnRK2) whose activity is activated by ionic (salt) and non-ionic (mannitol) osmotic stress. Kinase activity of its homolog in tobacco is induced by hyperosmotic condition within 1 minute. Phosphatidylinositol 4-phosphate 5-kinase (PIP5K) enzyme family member.	ASK1,SNRK2-4,SNRK2.4,SRK2A	0.327207526907752	0.00189063094365993
AT1G10950	Encodes an Arabidopsis Transmembrane nine (TMN) protein. Transmembrane nine (TM9) proteins are localized in the secretory pathway of eukaryotic cells and are involved in cell adhesion and phagocytosis. Functions in the deposition of rhamnogalacturonan II and I for cell growth.	AtTMN1,EMP12,TMN1	0.514397466985691	1.13980993148157e-15
AT1G11000	A member of a large family of seven-transmembrane domain proteins specific to plants, homologs of the barley mildew resistance locus o (MLO) protein. The Arabidopsis genome contains 15 genes encoding MLO proteins, with localization in plasma membrane. Phylogenetic analysis revealed four clades of closely-related AtMLO genes. ATMLO4 belongs to the clade I, with AtMLO11 and AtMLO14. The gene is exp…	ATMLO4,MLO4	1.77365777184044	4.5222642290047e-24
AT1G11020	RING/FYVE/PHD zinc finger superfamily protein;(source:Araport11)	NA	0.64842024776654	1.06171055313578e-06
AT1G11120	CTTNBP 2 amino-terminal-like protein;(source:Araport11)	NA	1.7039288142057	6.20697721706141e-14
AT1G11210	cotton fiber protein, putative (DUF761);(source:Araport11)	NA	2.29631704202351	1.25481906579225e-15
AT1G11240	ribosomal RNA-processing protein;(source:Araport11)	NA	0.974036560862905	0.0197805354916515
AT1G11260	Encodes a H+/hexose cotransporter. The mRNA is cell-to-cell mobile.	ATSTP1,STP1	1.90979515064754	6.65700825136249e-99
AT1G11270	F-box and associated interaction domains-containing protein;(source:Araport11)	NA	0.68382829454451	0.000216294543715658
AT1G11300	The annotation for At1g11300 in TAIR10 is incorrect. This locus has been split into two At1g11300 (symbol: EGM1) and At1g11305 (symbol: EGM2) (Olivier Loudet, personal communication, 2013-04-03). See Comment field for revised annotation.	EGM1	1.18119403106385	1.48955412171291e-05
AT1G11310	A member of a large family of seven-transmembrane domain proteins specific to plants, homologs of the barley mildew resistance locus o (MLO) protein. The Arabidopsis genome contains 15 genes encoding MLO proteins, with localization in plasma membrane. Phylogenetic analysis revealed four clades of closely-related AtMLO genes. ATMLO2 belongs to the clade IV, with AtMLO3, AtMLO6 and AtMLO12. The gen…	ATMLO2,MLO2,PMR2	0.383058604839477	8.33143728076464e-06
AT1G11360	Adenine nucleotide alpha hydrolases-like superfamily protein;(source:Araport11)	NA	0.724854479639746	1.59255883538592e-08
AT1G11380	PLAC8 family protein;(source:Araport11)	NA	0.396507350072814	0.00646466892713849
AT1G11400	The PYM gene encodes a protein capable of interacting with MAGO, and Y14, whose orthologs form part of the exon junction complex in animal cells. In vitro binding assays indicate that PYM can bind to MAGO and Y14 either individually, or when they are together. But, MAGO-Y14-PYM ternary complexes are difficult to detect in vivo in Arabidopsis based on pull-down experiments. However there is some e…	PYM	0.77967177047312	0.00276467064065908
AT1G11480	eukaryotic translation initiation factor-like protein;(source:Araport11)	NA	1.11606791327738	2.87801359088032e-32
AT1G11540	Sulfite exporter TauE/SafE family protein;(source:Araport11)	NA	0.94190135558685	0.00485031140884501
AT1G11545	xyloglucan endotransglucosylase/hydrolase 8;(source:Araport11)	XTH8	2.61178203329351	2.51058588437432e-87
AT1G11600	member of CYP77B	CYP77B1	0.611543275982399	0.00442942428956896
AT1G11660	heat shock protein 70 (Hsp 70) family protein;(source:Araport11)	HSP70-16	0.218488771852964	0.0337931181719705
AT1G11740	ankyrin repeat family protein;(source:Araport11)	NA	1.87293785866972	0.0495061005157153
AT1G11905	B-cell receptor-associated protein 31-like protein;(source:Araport11)	NA	0.624078574789304	0.00347936216432678
AT1G11910	Encodes an aspartic proteinase that forms a heterodimer and is stable over a broad pH range (ph 3-8).	APA1,ATAPA1,AtPaspA1,PaspA1	0.323996402195549	2.15742897862454e-05
AT1G11915	wall-associated receptor kinase galacturonan-binding protein;(source:Araport11)	NA	0.915949169599197	0.0346059893436937
AT1G11930	Putative pyridoxal phosphate-dependent enzyme, YBL036C type;(source:Araport11)	NA	0.714762354530458	0.00441964508378412
AT1G11950	Transcription factor jumonji (jmjC) domain-containing protein;(source:Araport11)	NA	1.17235197363816	7.90762903323115e-12
AT1G11960	Calcium channel that is phosphorylated by BIK1 in the presence of PAMPS and required for stomatal immunity.	NA	0.51678127616379	1.16852337366465e-05
AT1G12000	Phosphofructokinase family protein;(source:Araport11)	NA	0.267907168476074	0.00104001224691513
AT1G12013	Encodes a H/ACA-box snoRNA (snoR111). Gb: AJ505682	SNOR111	4.51296747464867	0.00362328034421689
AT1G12070	Immunoglobulin E-set superfamily protein;(source:Araport11)	NA	1.76035866347761	0.000764148478630972
AT1G12080	Vacuolar calcium-binding protein-like protein;(source:Araport11)	NA	5.73061715711828	1.32683670626167e-37
AT1G12110	Encodes NRT1.1 (CHL1), a dual-affinity nitrate transporter. The protein is expressed in guard cells and function in stomatal opening. Mutants have less transpiration and are more tolerant to drought. Expressed in lateral roots. Involved in nitrate signaling which enables the plant root system to detect and exploit nitrate-rich soil patches. Comparing to the wild type, the mutant displays a strong…	AtNPF6.3,ATNRT1,B-1,CHL1,CHL1-1,NPF6.3,NRT1,NRT1.1	1.94615079127222	5.76406944312969e-92
AT1G12160	Encodes a flavin-containing monooxygenases involved in biosynthesis of aliphatic glucosinolates.	FMOGS-OX7	1.10371891764241	1.11940447056327e-15
AT1G12220	Resistance gene, mediates resistance against the bacterial pathogen Pseudomonas syringae. Contains a putative nucleotide binding site composed of kinase-1a (or P-loop), kinase-2a, and putative kinase-3a domains, 13 imperfect leucine-rich repeats, a potential leucine zipper, and two uncharacterized motifs that are well conserved in products of previously isolated R genes. Confers resistance to Pse…	RPS5	0.813910496374825	1.28244722008327e-06
AT1G12280	Encodes a NB-LRR protein SUMM2 involved in defense response to bacterium.	SUMM2	0.463518546553476	0.0300592310266682
AT1G12290	NLR protein localized to plasma membrane. Overexpression triggers cell death. Has myristolation site at Gly2 which is required for membrane localization.	NA	1.1757438671927	7.57916247700272e-13
AT1G12310	Calcium-binding EF-hand family protein;(source:Araport11)	NA	0.336815831849493	0.000168328678302485
AT1G12350	At1g12350 encodes phosphopantothenoylcysteine synthetase (phosphopantothenoylcysteine ligase). Its molecular function was shown to add cysteine forming (R)-4?-phospho-N-pantothenoylcysteine (PPC)	ATCOAB,COAB	0.487420489750028	0.00364017984347759
AT1G12360	encodes a Sec1 protein and expressed throughout the plant. physically interacts with Syntaxin1 and is required for cytokinesis.	KEU,SEC11	0.504041474368771	2.93416741171321e-10
AT1G12420	ACT domain repeat 8;(source:Araport11)	ACR8	1.28749242593235	2.91500406025844e-11
AT1G12580	phosphoenolpyruvate carboxylase-related kinase 1;(source:Araport11)	PEPKR1	0.716733746444823	2.12151446503776e-12
AT1G12620	Required to generate the nad3-rps12 -141 5&	NA	0.538075499615732	0.0258412613985075
AT1G12650	rRNA biogenesis RRP36-like protein;(source:Araport11)	NA	1.29839774499967	2.01351661814065e-07
AT1G12680	phosphoenolpyruvate carboxylase-related kinase 2;(source:Araport11)	PEPKR2	0.389438099584899	0.001216956720353
AT1G12710	This gene is predicted to encode a protein with a PP2 domain. This domain in present in lectins found in squash and cucumber, suggesting that this protein could potentially have carbohydrate binding capabilities.	AtPP2-A12,PP2-A12	1.10903012763077	3.48111149006307e-09
AT1G12780	Encodes a UDP-glucose epimerase that catalyzes the interconversion of the sugar nucleotides UDP-glucose UDP-galactose via a UDP-4-keto-hexose intermediate. Responsive to stress.	ATUGE1,UGE1	1.52804079031783	5.9937601919821e-97
AT1G12790	DNA ligase-like protein;(source:Araport11)	NA	0.703241741335522	1.45724747764856e-05
AT1G12805	nucleotide binding protein;(source:Araport11)	NA	3.28327325944611	0.000859952009244076
AT1G12820	Auxin receptor involved in primary and lateral root growth inhibition in response to nitrate. Target of miR393. Induced by nitrate in primary roots.	AFB3	0.712685151113673	3.30080232609131e-17
AT1G12910	Encodes LIGHT-REGULATED WD1 (LWD1), a clock proteins regulating circadian period length and photoperiodic flowering.	ATAN11,LWD1	0.407960603765186	8.88340285159234e-06
AT1G12920	Encodes a eukaryotic release factor one homolog.	ERF1-2	0.959162629443265	6.04267850879314e-31
AT1G12970	Encodes PIRL3, a member of the Plant Intracellular Ras-group-related LRRs (Leucine rich repeat proteins). PIRLs are a distinct, plant-specific class of intracellular LRRs that likely mediate protein interactions, possibly in the context of signal transduction.	PIRL3	0.372145873155796	0.00382468289273501
AT1G12990	beta-1,4-N-acetylglucosaminyltransferase family protein;(source:Araport11)	NA	0.36040741188981	0.00164871759618867
AT1G13000	transmembrane protein, putative (DUF707);(source:Araport11)	NA	0.627942642463666	3.97171476265078e-05
AT1G13020	Encodes eIF4B2, eukaryotic initiation factor 4B2.	EIF4B2	0.686943421099163	6.90276490135412e-08
AT1G13100	putative cytochrome P450	CYP71B29	0.454960499027832	0.0140834257799715
AT1G13190	RNA-binding (RRM/RBD/RNP motifs) family protein;(source:Araport11)	NA	0.635022145257178	1.62891351330137e-07
AT1G13210	Autoinhibited Ca2+/ATPase II. ALA11 acts redundantly with ALA3, ALA4, ALA5, ALA9, ALA10 in root and shoot development as well as PIN trafficking and polarity .	ACA.l	0.84812545082928	6.43313346869116e-20
AT1G13250	Encodes a protein with putative galacturonosyltransferase activity.	GATL3	0.690070745026332	1.42663053229888e-07
AT1G13260	Encodes an AP2/B3 domain transcription factor which is upregulated in response to low temperature. It contains a B3 DNA binding domain. It has circadian regulation and may function as a negative growth regulator. The mRNA is cell-to-cell mobile.	AtRAV1,EDF4,RAV1	3.21413501678145	4.73213098657365e-150
AT1G13280	Encodes allene oxide cyclase. One of four genes in Arabidopsis that encode this enzyme, which catalyzes an essential step in jasmonic acid biosynthesis. Gene expression is reduced during senescence, a process that involves jasmonic acid signalling pathway.	AOC4	1.3168389579173	5.57438742645591e-25
AT1G13350	Paralog of PRP4KA.	PRP4KB	0.418086659259447	0.00421142151161669
AT1G13420	Encodes a sulfotransferase. Unlike the related ST4A protein (At2g14920), in vitro experiments show that this enzyme does not act brassinosteroids. ST4B is expressed in the roots and transcript levels rise in response to cytokinin treatment.	ATST4B,ST4B	0.763226136238176	0.00780016531632373
AT1G13430	Encodes a sulfotransferase. Unlike the related ST4A protein (At2g14920), in vitro experiements show that this enzyme does not act brassinosteroids. ST4C is expressed in the roots and transcript levels rise in response to cytokinin treatment.	ATST4C,ST4C	1.51126689306209	8.34633922646935e-06
AT1G13450	Encodes GT-1, a plant transcription factor that binds to one of the cis-acting elements, BoxII, which resides within the upstream promoter region of light-responsive genes. GT-1 was assumed to act as a molecular switch modulated through Ca(2+)-dependent phosphorylation/dephosphorylation in response to light signals.	GT-1	0.373044207049847	0.00736409120290645
AT1G13530	soluble N-ethylmaleimide-sensitive factor (NSF) adaptor protein	NA	1.57647138227504	0.00547751150967509
AT1G13570	F-box/RNI-like superfamily protein;(source:Araport11)	NA	0.684512160890331	3.75277395974068e-10
AT1G13590	Encodes a phytosulfokine-alpha (PSK) precursor, a unique plant peptide growth factor first described in Asparagus.	ATPSK1,PSK1	1.23879110964379	0.0119133057289926
AT1G13640	Phosphatidylinositol 3- and 4-kinase family protein;(source:Araport11)	NA	1.67060753095236	2.98006457553173e-104
AT1G13780	F-box/RNI-like/FBD-like domains-containing protein;(source:Araport11)	NA	0.438614211283247	0.0136839272107993
AT1G13870	Encodes a homolog of the yeast TOT4/KTI12 protein. Yeast TOT4/KTI12 associates with Elongator, a multisubunit complex that binds the RNA polymerase II transcription elongation complex. Ds insertion mutant has enlarged shoot apical region, 4 to 6 long slender leaves followed by spike-like structures, short roots. Mutants also have no ncm5U (5-carbamoylmethyluridine).	AtKTI12,DRL1	0.519802519921052	0.0126534289662481
AT1G13880	ELM2 domain-containing protein;(source:Araport11)	ELM2	0.266552125303825	0.0182738738886387
AT1G13920	Remorin family protein;(source:Araport11)	NA	1.01142844513392	0.028138270129906
AT1G13960	Encodes WRKY DNA-binding protein 4 (WRKY4).	WRKY4	0.362445206190826	0.000270724615471711
AT1G13980	Encodes a GDP/GTP exchange factor for small G-proteins of the ADP ribosylation factor (RAF) class, and as regulator of intracellular trafficking. Homologous to Sec7p and YEC2 from yeast. Involved in the specification of apical-basal pattern formation. Essential for cell division, expansion and adhesion. It appears that heteotypic binding between the DCB and C-terminal domains of two GNOM proteins…	EMB30,GN,MIZ2,VAN7	0.670987571284516	8.43066462464949e-24
AT1G13990	plant/protein;(source:Araport11)	NA	0.63590958841934	0.00575555575062114
AT1G14080	Encodes an alpha-(1,2)-fucosyltransferase.	ATFUT6,FUT6	0.456146795980016	0.0139877117253086
AT1G14170	RNA-binding KH domain-containing protein;(source:Araport11)	NA	0.854279050880021	1.61928957973495e-10
AT1G14200	E3 ligase involved in the regulation of the homeostasis of sensor NLR immune receptors.	NA	0.91975211976566	0.00143212456686458
AT1G14330	Galactose oxidase/kelch repeat superfamily protein;(source:Araport11)	NA	0.518663837774517	2.55191995817618e-05
AT1G14370	Encodes protein kinase APK2a. Protein is N-myristoylated.	APK2A,Kin1,PBL2	1.04365180941857	1.58230030171675e-15
AT1G14390	Leucine-rich repeat protein kinase family protein;(source:Araport11)	NA	1.62930941821342	2.76980339423428e-08
AT1G14400	ubiquitin carrier protein	ATUBC1,UBC1,UBC1	0.374157803401382	6.13922266450849e-08
AT1G14440	homeobox protein 31;(source:Araport11)	AtHB31,FTM2,HB31,ZHD4	0.309052532215626	0.0263289709152794
AT1G14510	Encodes a member of the Alfin1-like family of nuclear-localized PHD (plant homeodomain) domain containing proteins. All AL proteins except AL3 bind to di- or trimethylated histone H3 (H3K4me3/2). Members of this family include: AT5G05610 (AL1), AT3G11200 (AL2), AT3G42790 (AL3), AT5G26210 (AL4), AT5G20510 (AL5), AT2G02470 (AL6), AT1G14510 (AL7).	AL7,AtAL7	0.68226005664137	1.42960957828555e-08
AT1G14530	tobamovirus multiplication-like protein (DUF1084);(source:Araport11)	THH1	0.750001262577558	0.00130968047443392
AT1G14560	Encodes a mitochondrial CoA transporter.	CoAc1	0.308939680513021	0.0295300191301428
AT1G14570	Encodes a nuclear UBX-containing protein that can bridge ubiquitin to AtCDC48A.	AtPUX7,PUX7	0.199972406760926	0.040149345495867
AT1G14600	Homeodomain-like superfamily protein;(source:Araport11)	NA	1.25715583966543	3.71761310800279e-06
AT1G14685	Encodes a member of the BASIC PENTACYSTEINE (BPC) proteins. BPC proteins are plant-specific transcription factors present throughout land plants. BPC transcription factor family is integral for a wide range of processes that support normal growth and development.Along with BPC1, BPC2 binds to the promoter of and represses GALS1 thereby reducing beta 1,4- galactan accumulation.	ATBPC2,BBR/BPC2,BPC2	0.644748430388274	2.87847937353565e-13
AT1G14690	microtubule-associated protein 65-7;(source:Araport11)	MAP65-7	0.447557665009147	0.00292218291603496
AT1G14740	Encodes a PHD-finger protein that, with TTA1, is redundantly required for MP-dependent embryonic root meristem initiation.	OBE3,TTA1	1.54387026297714	2.19797875875019e-104
AT1G14790	Encodes RNA-dependent RNA polymerase. While not required for virus-induced post-transcriptional gene silencing (PTGS), it can promote turnover of viral RNAs in infected plants. Nomenclature according to Xie, et al. (2004). Involved in the production of Cucumber Mosaic Virus siRNAs.	AtRDR1,ATRDRP1,RDR1	0.469539743076562	0.000269349876772054
AT1G14830	Encodes a dynamin-like protein that is involved in mitochondrial morphogenesis and pollen development. Protein is localized as speckles in the cytoplasm, partially co-localizes with mitochondrial markers, cell plate of dividing cells, and the tip of root hairs, root cap cells, and expanding part of trichoblasts.	ADL1C,ADL5,DL1C,DRP1C	0.468059610195213	7.61253283639293e-10
AT1G14850	Encodes a protein similar to nucleoporin, a a major component of the nuclear pore complex (NPC) involved in cellular nucleo-cytoplasmic transport	NUP155	0.19874324004506	0.023883247149218
AT1G14860	nudix hydrolase homolog 18;(source:Araport11)	atnudt18,NUDT18	1.99920592674121	7.39724494581455e-39
AT1G14870	PCR2 encodes a membrane protein involved in zinc transport and detoxification.	AtPCR2,PCR2	1.26537918931486	1.05091591452341e-15
AT1G14890	Plant invertase/pectin methylesterase inhibitor superfamily protein;(source:Araport11)	NA	1.32263474919996	3.02234638268618e-43
AT1G14900	Encodes a protein belonging to the subgroup of HMGA (high mobility group A) proteins that interact with A/T-rich stretches of DNA.	HMGA	0.794771695747956	4.6270118585735e-21
AT1G14910	ANTH domain-containing protein which functions as adaptor protein for clathrin-mediated endocytosis (CME) of the secretory vesicle-associated longintype R-SNARE VAMP72 group. Interacts with the SNARE domain of VAMP72 and clathrin at the plasma membrane. Required for recycling of R-SNARE proteins.	PICALM1b	0.21219297752196	0.0309744586329205
AT1G14920	Similar to a putative transcription factor and transcriptional coactivators. Repressor of GA responses and involved in gibberellic acid mediated signaling. Member of the DELLA proteins that restrain the cell proliferation and expansion that drives plant growth. The protein undergoes degradation in response to GA via the 26S proteasome. GAI may be involved in reducing ROS accumulation in response …	GAI,RGA2	1.01874887260002	4.06709094579028e-30
AT1G15002	Natural antisense transcript overlaps with AT1G15000;(source:Araport11)	NA	0.798820437707548	0.00017099587328261
AT1G15020	Encodes a protein disulfide isomerase-like (PDIL) protein, a member of a multigene family within the thioredoxin (TRX) superfamily. This protein also belongs to the quiescin-sulfhydryl oxidase (QSOX) family, which possess an Erv1-like domain at the COOH terminus in addition to a TRX domain.	ATQSOX1,QSO2,QSOX1	0.367039970280141	0.000158335466561106
AT1G15040	Encodes a nitrogen regulated putative glutamine amidotransferase that represses shoot branching.	GAT,GAT1_2.1	0.586898114947717	2.35906679367233e-05
AT1G15120	Ubiquinol-cytochrome C reductase hinge protein;(source:Araport11)	NA	0.314841985537016	0.00983934188573028
AT1G15200	protein-protein interaction regulator family protein;(source:Araport11)	NA	1.02267599952381	9.52740072263522e-07
AT1G15210	pleiotropic drug resistance 7;(source:Araport11)	ABCG35,ATPDR7,PDR7	1.41926614986675	3.85905240291464e-68
AT1G15220	Encodes a protein with oxidoreductase activity present in the inner membrane of mitochondria. CCMH is postulated to play a central role in mitochondrial cytochrome c maturation, probably as part of a heme lyase complex that also holds activity of reducing apocytochrome c. CCMH interacts with apocytochrome AtCYTc-a and is shown to be present in a 500 kDa-complex along with CcmFN2.	ATCCMH,CCMH	1.05370607278956	5.99226584354954e-06
AT1G15230	hypothetical protein;(source:Araport11)	NA	1.37494427937171	9.60672113567015e-10
AT1G15240	Encodes a member of the Arabidopsis sorting nexin family.	NA	0.294293607611222	0.000949274109208567
AT1G15330	Cystathionine beta-synthase (CBS) protein;(source:Araport11)	NA	3.56553780942539	1.53707722193348e-14
AT1G15350	DUF4050 family protein;(source:Araport11)	NA	1.58715014598284	9.57424717342142e-60
AT1G15400	Tightly connected with MAPK signaling to fine-tune stomatal production and patterning.	NA	0.841700753762801	3.01808229719838e-08
AT1G15405	other_RNA;(source:Araport11)	NA	0.733726512062953	0.0359223148842122
AT1G15410	aspartate-glutamate racemase family;(source:Araport11)	NA	0.651017257778811	2.52297386961143e-06
AT1G15430	hypothetical protein (DUF1644);(source:Araport11)	NA	0.313016344760461	0.0346704076258055
AT1G15500	TLC ATP/ADP transporter;(source:Araport11)	ATNTT2	0.443330905993128	5.23171429519035e-08
AT1G15550	Involved in later steps of the gibberellic acid biosynthetic pathway. Activated by AGAMOUS in a cal-1, ap1-1 background. Deletion of 208 bp from -1016 to -809 (&	ATGA3OX1,GA3OX1,GA4	0.989748872344844	1.99423493421142e-11
AT1G15580	auxin induced protein	ATAUX2-27,AUX2-27,IAA5	2.40148004381352	0.0215719064946645
AT1G15625	E3 ubiquitin-protein ligase;(source:Araport11)	NA	4.0522387847835	1.05440605682634e-07
AT1G15670	Encodes a member of a family of F-box proteins, called the KISS ME DEADLY (KMD) family, that targets type-B ARR proteins for degradation and is involved in the negative regulation of the cytokinin response. Also named as KFB1, a member of a group of Kelch repeat F-box proteins that negatively regulate phenylpropanoid biosynthesis by targeting the phenypropanoid biosynthesis enzyme phenylalanine a…	KFB01,KMD2	1.10393148020249	6.50449061160288e-30
AT1G15740	Leucine-rich repeat family protein;(source:Araport11)	NA	0.362526543375637	2.89084595175919e-07
AT1G15750	Encodes a protein with several WD40 repeats at the C-terminus and predicted protein-protein interaction domains at the N-terminus. Together with the TOPLESS-RELATED PROTEINS (TPRs), it is thought to be involved in transcriptional repression of root-promoting genes in the top half of the embryo during the transition stage of embryogenesis. It can also interact with IAA12 through the EAR domain of …	TPL,WSIP1	0.445283604142204	1.12776988992154e-11
AT1G15800	hypothetical protein;(source:Araport11)	NA	1.37974398613391	7.90756323063853e-11
AT1G15880	Golgi SNARE 11 protein (GOS11)	atgos11,GOS11	0.567263035068777	1.77361489077891e-06
AT1G15910	Belongs to a subgroup of SGS3-like proteins that act redundantly in RNA-directed DNA methylation: AT1G15910 (FDM1), AT4G00380 (FDM2), AT3G12550 (FDM3), AT1G13790 (FDM4), AT1G80790 (FDM5).	FDM1,IDNL1,IDP1	0.603076462528355	7.07648627772605e-06
AT1G15920	Deadenylase.	NA	0.321122075104277	0.00821839709517323
AT1G15930	Ribosomal protein L7Ae/L30e/S12e/Gadd45 family protein;(source:Araport11)	NA	0.293140889422254	0.00291243104908596
AT1G16040	phosphatidylinositol-glycan biosynthesis class F-like protein;(source:Araport11)	NA	0.513442821310399	0.0494493723137051
AT1G16110	Encodes a WAK-like receptor-like kinase with a cytoplasmic Ser/Thr protein kinase domain and an extracellular domain with EGF-like repeats. It has been shown to be localized to the cell wall.	WAKL6	1.39055327199953	4.71436166627339e-08
AT1G16160	WAK-like kinase The mRNA is cell-to-cell mobile.	WAKL5	1.6871880445717	0.00271572565143375
AT1G16170	ephrin-A3 protein;(source:Araport11)	NA	0.551902747960193	1.41582337798603e-06
AT1G16240	Encodes one of 24 Arabidopsis syntaxins. Its mRNA has been shown to be expressed.	ATSYP51,SYP51	1.1605365581784	4.14825954734282e-38
AT1G16250	Galactose oxidase/kelch repeat superfamily protein;(source:Araport11)	NA	1.20261197669293	1.25865824620998e-16
AT1G16300	Encodes one of the chloroplast/plastid localized GAPDH isoforms (GAPCp1/At1g79530 and GAPCp2/At1g16300). gapcp double mutants display a drastic phenotype of arrested root development, dwarfism and sterility. GAPCps are important for the synthesis of serine in roots.	GAPCP-2	0.85674576316194	8.59134708768954e-10
AT1G16340	Encodes a protein with putative 3-deoxy-D-manno-octulosonic acid 8-phosphate synthetase activity. This gene share a very high sequence homology with its homologue AtkdsA1 (AT1G79500).	AtKDO8PS,ATKDSA2,ATKSDA	0.715529811901372	0.00246652479436966
AT1G16370	organic cation/carnitine transporter 6;(source:Araport11)	ATOCT6,OCT6	0.884398276736459	9.585724318963e-07
AT1G16390	organic cation/carnitine transporter 3;(source:Araport11)	ATOCT3	0.427981690069444	0.0169447990783216
AT1G16490	Member of the R2R3 factor gene family.	ATMYB58,MYB58	2.81156440880229	0.000108967009868377
AT1G16560	Per1-like family protein;(source:Araport11)	NA	0.487428219247211	5.19159511563183e-09
AT1G16680	Chaperone DnaJ-domain superfamily protein;(source:Araport11)	NA	0.445360040624397	0.00355327209598983
AT1G16790	ribosomal protein-like protein;(source:Araport11)	NA	0.851780371971624	0.0194356963847905
AT1G16860	Plasma membrane-localized proteins that negatively regulate cellulose synthesis by inhibiting the exocytosis of CESAs.	SHOU4L	0.440059428101888	3.67032617018717e-07
AT1G16890	UBC36/UBC13B encodes a protein that may play a role in DNA damage responses and error-free post-replicative DNA repair. It can bind to the MMZ/UEV1 proteins in vitro.	AtUBC36,UBC13B,UBC36	0.494902687835337	8.84223443555164e-09
AT1G16905	Curculin-like (mannose-binding) lectin family protein;(source:Araport11)	NA	1.22513873224368	0.00324458226617756
AT1G16916	transmembrane protein;(source:Araport11)	NA	1.24893930467932	0.00190848854548318
AT1G16920	small GTP-binding protein (Rab11)similar to YPT3/RAB11 proteins in yeast and mammals, respectively. YPT3/RAB11 is involved in intracellular protein trafficking.	ATRABA1B,BEX5,RAB11,RABA1b	1.16686565056975	3.86884359153065e-25
AT1G16930	F-box/RNI-like/FBD-like domains-containing protein;(source:Araport11)	NA	0.790055212077913	1.73730967788328e-08
AT1G17060	Encodes a protein with similarity to other cytochrome P450's and is a homolog of BAS1. Over expression causes a dwarf phenotype resembling brassinolide resistant mutants. Double mutant analysis of sob7/bas1 loss of function mutants suggests these genes have redundant functions in light responsiveness. SOB7 may function in metabolizing brassinolides. Expressed in leaf, root, stem and silique but e…	CHI2,CYP72C1,SHK1,SOB7	1.66457123424052	5.83973848100491e-45
AT1G17110	Encodes a ubiquitin-specific protease, and its activity has been confirmed in an in vitro assay. ubp15 mutants have defects in cell proliferation, and the associated processes of leaf, root, stem, flower, and silique development. UBP15 can be found in the nucleus and cytoplasm in transient assays. Though UBP15 is expressed in many tissues, UBP15 transcript levels are higher in rosette leaves and …	UBP15	0.313582137379501	0.000205451864676841
AT1G17145	RING/U-box superfamily protein;(source:Araport11)	NA	0.521341102271052	0.000323056525066434
AT1G17230	Leucine-rich receptor-like protein kinase family protein;(source:Araport11)	NA	1.33594879395898	1.98564667204259e-30
AT1G17270	O-fucosyltransferase family protein;(source:Araport11)	NA	0.452879240936633	0.0147682720900376
AT1G17345	SAUR-like auxin-responsive protein family;(source:Araport11)	SAUR77	2.41935928531105	6.97159053960932e-13
AT1G17400	Protein of unknown function. Similar to LAZY1, a gene required or gravitropic response in shoots and roots. Involved in determining lateral root branch angle.	AtLAZY2,AtNGR1,DRO3,LAZY2	2.48003455070557	0.0327280765481016
AT1G17410	Nucleoside diphosphate kinase family protein;(source:Araport11)	NA	0.837774029473033	8.33880240543354e-05
AT1G17430	alpha/beta-Hydrolases superfamily protein;(source:Araport11)	NA	0.652386387110267	0.000178499352560181
AT1G17450	B-block binding subunit of TFIIIC;(source:Araport11)	NA	0.626995954308527	2.5949550073899e-13
AT1G17455	ELF4-like 4;(source:Araport11)	ELF4-L4	1.36320754394825	0.003683408785666
AT1G17460	Arabidopsis thaliana myb family transcription factor (At1g17460)	TRFL3	0.908495704306631	4.99125525682333e-06
AT1G17470	Encodes a member of the DRG (developmentally regulated G-protein) family expressed throughout the plant, with highest expression in actively growing tissues. Has GTPase activity.	ATDRG,ATDRG1,DRG1,Drg1-2	0.734857369991421	9.06268210882318e-14
AT1G17500	ATPase E1-E2 type family protein / haloacid dehalogenase-like hydrolase family protein. ALA4 acts redundantly with ALA3, ALA5, ALA9, ALA10 and ALA11 in root and shoot development	NA	0.824375429388642	1.21163120327096e-27
AT1G17520	Single Myb Histone (SMH) gene family member. Contains terminal acidic SANT domain.	NA	0.574754609989515	0.000865060344277738
AT1G17530	Encodes a translocase of inner mitochondrial membrane.	ATTIM23-1,TIM23-1	0.469089082570595	0.000186456670157092
AT1G17540	kinase with adenine nucleotide alpha hydrolases-like domain-containing protein;(source:Araport11)	NA	3.80611299364147	0.0178506302658184
AT1G17550	Protein Phosphatase 2C	AtHAB2,HAB2	0.780409922555871	1.3625628896183e-10
AT1G17610	TN-type protein that controls temperature-dependent growth and defense responses .Mutant accumulates steryl-esters at low temperatures and shows temperature dependent activation of defense responses..	CHS1	1.30467861098412	0.000921309158663562
AT1G17665	CA-responsive protein;(source:Araport11)	NA	1.6841940963341	5.62181301876036e-08
AT1G17680	tetratricopeptide repeat (TPR)-containing protein;(source:Araport11)	NA	0.692635500311295	1.41987207770343e-07
AT1G17700	prenylated RAB acceptor 1.F1;(source:Araport11)	PRA1.F1	1.20045378749205	0.00152832834862232
AT1G17730	Encodes an ESCRT-related protein: CHMP1A/AT1G73030; CHMP1B/AT1G17730. CHMP1A and B mediate multivesicular body sorting of auxin carriers and are required for plant development. ESCRT: Endosomal Sorting Complexes Required For Transport machinery; CHMP: Charged Multivesicular Body Protein/Chromatin Modifying Protein.	CHMP1B,VPS46.1	0.38755425303887	0.00770200839279107
AT1G17745	encodes a 3-Phosphoglycerate dehydrogenase The mRNA is cell-to-cell mobile.	PGDH,PGDH2	0.413657531521515	2.83243392283952e-05
AT1G17770	Encodes a SU(VAR)3-9 homolog, a SET domain protein. Known SET domain proteins are involved in epigenetic control of gene expression and act as histone methyltransferases. There are 10 SUVH genes in Arabidopsis and members of this subfamily of the SET proteins have an additional conserved SRA domain. A paternally expressed imprinted gene.	SDG17,SUVH7	3.66527424914929	0.0321306330625599
AT1G17810	beta-tonoplast intrinsic protein (beta-TIP) mRNA, complete	BETA-TIP,TIP3.2,TIP3	5.44076044557503	8.25836587687504e-21
AT1G17930	Mobile domain protein involved in silencing of transposable elements. Loss of function affects shoot and root meristem maintenance. Interacts and functions with MAIL1 and PP7L in gene silencing.	MAIN	0.793157871009889	0.000539149944474925
AT1G17940	Endosomal targeting BRO1-like domain-containing protein;(source:Araport11)	NA	0.598370031361197	0.00338977789831846
AT1G17960	Threonyl-tRNA synthetase;(source:Araport11)	NA	0.518952335237258	0.0313495571882699
AT1G18030	Protein phosphatase 2C family protein;(source:Araport11)	NA	0.737418665587795	0.00227179764963073
AT1G18100	Encodes a member of the FT and TFL1 family of phosphatidylethanolamine-binding proteins. It is expressed in seeds and up-regulated in response to ABA. Loss of function mutants show decreased rate of germination in the presence of ABA. ABA dependent regulation is mediated by both ABI3 and ABI5. ABI5 promotes MFT expression, primarily in the radicle-hypocotyl transition zone and ABI3 suppresses it …	E12A11,MFT	2.12791917178555	4.32008279273435e-27
AT1G18140	putative laccase, a member of laccase family of genes (with 17 members in Arabidopsis).	ATLAC1,LAC1	1.12016525110735	0.000107377021054979
AT1G18160	required for ABA- and osmotic-stress-MAP3 kinase required for activation of SnRK2 kinases, enabling robust ABA and osmotic stress signal transduction.	NA	0.585702522142993	3.62009703770917e-14
AT1G18200	Rab GTPase-like A1I protein;(source:Araport11)	AtRABA6b,RABA6b	1.70956117017585	1.00411135832534e-05
AT1G18260	Encodes an Arabidopsis homolog of the yeast Hrd3/mammlian Sel1L protein. Involved in ERAD (Endoplasmic reticulum-associated degradation).	EBS5,HRD3A	0.444993518216605	4.94592278915478e-07
AT1G18270	ketose-bisphosphate aldolase class-II family protein;(source:Araport11)	NA	0.650033831060925	5.86730683128244e-14
AT1G18290	PADRE protein up-regulated after infection by S. sclerotiorum.	NA	1.42293814181607	0.000952093687131915
AT1G18300	nudix hydrolase homolog 4;(source:Araport11)	atnudt4,NUDT4	0.86802091979638	0.000150241263197804
AT1G18400	Encodes the brassinosteroid signaling component BEE1 (BR-ENHANCED EXPRESSION 1). Positively modulates the shade avoidance syndrome in Arabidopsis seedlings.	BEE1	0.758552389227545	0.0347885376198853
AT1G18450	Encodes a gene similar to actin-related proteins in other organisms. Member of nuclear ARP family of genes. Component of chromatin remodeling complexes, involved in chromatin-mediated gene regulation. Phenotype of the arp4-1 mutant allele revealed partial sterility due to defects in anther development. Targeting the distinct, 3' UTR of AtARP4 transcripts with RNA interference caused a drastic red…	ARP4,ATARP4	0.263670157941778	0.00528222969744702
AT1G18570	Encodes a member of the R2R3-MYB transcription family. Involved in indole glucosinolate biosynthesis. The mRNA is cell-to-cell mobile.	AtMYB51,BW51A,BW51B,HIG1,MYB51	0.612036890960846	6.2777583718722e-05
AT1G18580	Encodes a protein with putative galacturonosyltransferase activity.GAUT11 is required for pectin synthesis in seed coat epidermal cells and normal mucilage release.	GAUT11	0.421313278111571	3.38119834061244e-05
AT1G18690	Galactosyl transferase GMA12/MNN10 family protein;(source:Araport11)	XXT4	0.812810000874368	1.5607201938625e-06
AT1G18700	DNAJ heat shock N-terminal domain-containing protein;(source:Araport11)	NA	0.523504786218742	9.82787538484985e-09
AT1G18773	acyl thioesterase-like protein;(source:Araport11)	NA	1.75183089450906	9.12933175328331e-11
AT1G18840	Member of IQ67 (CaM binding) domain containing family.	IQD30	0.681071273522792	5.87706077810578e-09
AT1G18890	encodes a calcium-dependent protein kinase whose gene expression is induced by dehydration and high salt. Kinase activity could not be detected in vitro.	ATCDPK1,AtCPK10,CDPK1,CPK10	0.417986637561634	7.3224792598985e-05
AT1G18990	myosin-binding protein, putative (Protein of unknown function, DUF593);(source:Araport11)	NA	1.62004237098757	0.00552734535498356
AT1G19070	F-box family protein;(source:Araport11)	NA	2.42888497605027	0.00121684016774364
AT1G19110	inter-alpha-trypsin inhibitor heavy chain-like protein;(source:Araport11)	NA	0.563692757264745	2.79299429481863e-15
AT1G19170	Pectin lyase-like superfamily protein;(source:Araport11)	NA	0.909446790230077	7.15026430347365e-10
AT1G19180	JAZ1 is a nuclear-localized protein involved in jasmonate signaling. JAZ1 transcript levels rise in response to a jasmonate stimulus. JAZ1 can interact with the COI1 F-box subunit of an SCF E3 ubiquitin ligase in a yeast-two-hybrid assay only in the presence of jasmonate-isoleucine (JA-ILE) or coronatine. Application of jasmonate methyl ester to Arabidopsis roots reduces the levels of a JAZ1:GUS …	AtJAZ1,JAZ1,TIFY10A	0.31164060317382	0.0355878568589261
AT1G19300	The PARVUS/GLZ1 gene encodes a putative family 8 glycosyl transferase that contributes to xylan biosynthesis. Its gene expression shows good co-variance with the IRX3 gene involved in secondary cell wall synthesis. PARVUS/GLZ1 is predicted to have galacturonosyltransferase activity and may be involved in the formation of the complex oligosaccharide sequence present at the reducing end of xylan. P…	ATGATL1,GATL1,GLZ1,PARVUS	0.326057233305388	0.042499839488004
AT1G19310	RING/U-box superfamily protein;(source:Araport11)	NA	0.611519780256945	0.000130982745151778
AT1G19340	Methyltransferase MT-A70 family protein;(source:Araport11)	NA	0.856357739370866	0.00648875027971425
AT1G19360	Encodes an arabinosyltransferase that modifies extensin proteins in root hair cells.	RRA3	0.581938774744124	4.97919537808949e-09
AT1G19370	membrane protein;(source:Araport11)	NA	1.07010451166987	1.88447233407489e-19
AT1G19380	sugar, putative (DUF1195);(source:Araport11)	NA	0.699471774981375	0.00900582498719974
AT1G19397	transmembrane protein;(source:Araport11)	NA	0.631754797864775	0.0320013050034673
AT1G19400	Tail-anchored (TA) OEP membrane protein which possesses a single C-terminal transmembrane domain targeting post-translationally to plastids.	E-4PDHase	0.634385342218935	6.32257817124968e-11
AT1G19430	S-adenosyl-L-methionine-dependent methyltransferases superfamily protein;(source:Araport11)	NA	0.331493638462691	0.0046577839073198
AT1G19485	Transducin/WD40 repeat-like superfamily protein;(source:Araport11)	NA	0.567171866285378	2.23635349309889e-05
AT1G19510	RAD-like 5;(source:Araport11)	ATRL5,RL5,RSM4	2.45510473977992	4.44438778480348e-06
AT1G19530	Direct target of RGA, plays an essential role in GA-mediated tapetum and pollen development.	NA	3.31826487484117	1.83260209867334e-56
AT1G19540	NmrA-like negative transcriptional regulator family protein;(source:Araport11)	NA	2.53408129068938	3.76826079581779e-62
AT1G19600	pfkB-like carbohydrate kinase family protein;(source:Araport11)	NA	1.05251524425524	4.44616100691158e-29
AT1G19610	Predicted to encode a PR (pathogenesis-related) protein. Belongs to the plant defensin (PDF) family with the following members: At1g75830/PDF1.1, At5g44420/PDF1.2a, At2g26020/PDF1.2b, At5g44430/PDF1.2c, At2g26010/PDF1.3, At1g19610/PDF1.4, At1g55010/PDF1.5, At2g02120/PDF2.1, At2g02100/PDF2.2, At2g02130/PDF2.3, At1g61070/PDF2.4, At5g63660/PDF2.5, At2g02140/PDF2.6, At5g38330/PDF3.1 and At4g30070/PDF…	LCR78,PDF1.4	1.74781036936577	9.59224304659668e-13
AT1G19680	RING/U-box superfamily protein;(source:Araport11)	NA	0.856199434115394	3.46146299928365e-21
AT1G19710	UDP-Glycosyltransferase superfamily protein;(source:Araport11)	NA	0.476537103184272	0.0381576265762381
AT1G19830	SAUR-like auxin-responsive protein family;(source:Araport11)	SAUR54	3.47756933796746	1.05833090272192e-07
AT1G19835	TCS1 encodes a coiled-coil domain protein that binds to microtubules and co-localizes with the cortical microtubules. Mutants have defects in trichome branching and hypocotyl elongation. TCS1 interacts with ZWI and appears to be involved in microtubule assembly.	TCS1	1.15866796304071	6.55959214838648e-47
AT1G19840	SAUR-like auxin-responsive protein family;(source:Araport11)	SAUR53	2.40397676920644	3.03050026363422e-09
AT1G19870	Encodes a microtubule-associated protein.Member of IQ67 (CaM binding) domain containing family.	IQD32	1.12302803837286	2.73297211795651e-35
AT1G19880	Encodes a regulator of chromatin condensation 1 (RCC1) family protein; confers plasticity of rosette diameter in response to changes in N availability.	NA	0.927045523394023	2.46462667757136e-20
AT1G19900	RUBY encodes a secreted galactose oxidase involved in cell wall modification.	RUBY	0.972947270306352	2.56239873099121e-08
AT1G19910	vacuolar H+-pumping ATPase 16 kDa proteolipid (ava-p2)	ATVHA-C2,AVA-2PE,AVA-P2	0.520505614433074	2.5105695236158e-15
AT1G19940	glycosyl hydrolase 9B5;(source:Araport11)	AtGH9B5,GH9B5	0.98815500400278	0.0115109368872637
AT1G20010	beta tubulin	TUB5	1.27470195748371	7.09524077873355e-39
AT1G20050	C-8 sterol isomerase that also plays a role in miRNA function.	HYD1,MAD4	0.277379411436361	0.000419385626128587
AT1G20070	hypothetical protein;(source:Araport11)	NA	0.764081550034256	6.88846761057407e-06
AT1G20100	DNA ligase-like protein;(source:Araport11)	NA	0.43761268577508	8.70260630895916e-05
AT1G20160	Encodes two isoforms. One (SBT5.2(a) ) is a secreted, cell wall localized subtilisin-like serine protease that is involved in regulation of stomatal development. The second isoform (SBT5.2(b) is localized to endosomes.	ATSBT5.2,CRSP,SBT5.2(a),SBT5.2(b)	1.40623053091257	8.45935527528789e-55
AT1G20190	member of Alpha-Expansin Gene Family. Naming convention from the Expansin Working Group (Kende et al, 2004. Plant Mol Bio)	ATEXP11,ATEXPA11,ATHEXP_ALPHA_1.14,EXP11,EXPA11	2.77316134876035	2.27403793177362e-68
AT1G20410	Pseudouridine synthase family protein;(source:Araport11)	NA	0.616076372413577	0.00209810479035012
AT1G20440	Belongs to the dehydrin protein family, which contains highly conserved stretches of 7-17 residues that are repetitively scattered in their sequences, the K-, S-, Y- and lysine rich segments. Cold regulated gene, amino acid sequence homology with Group II LEA (late embryogenesis abundant) proteins. Also responds to osmotic stress, ABA, dehydration and inhibits e.coli growth while overexpressed. C…	AtCOR47,COR47,RD17	1.03135180820677	3.884658041137e-13
AT1G20460	NADH-ubiquinone oxidoreductase chain;(source:Araport11)	NA	0.841313658607908	1.25517390175858e-05
AT1G20490	AMP-dependent synthetase and ligase family protein;(source:Araport11)	NA	0.491047129413834	0.0145426763264107
AT1G20520	DUF241 domain protein, putative (DUF241);(source:Araport11)	NA	5.59293297303466	0.000179230209348481
AT1G20540	Transducin/WD40 repeat-like superfamily protein;(source:Araport11)	NA	0.325103835802829	0.0276051629537092
AT1G20620	Catalase, catalyzes the breakdown of hydrogen peroxide (H2O2) into water and oxygen. The mRNA is cell-to-cell mobile.	ATCAT3,CAT3,SEN2	1.00082920928671	2.75534429147215e-31
AT1G20640	Plant regulator RWP-RK family protein;(source:Araport11)	NLP4	0.298732739827492	0.00597035315406483
AT1G20691	Natural antisense transcript overlaps with AT1G20690;(source:Araport11)	NA	1.74271677137625	3.05977402474578e-18
AT1G20693	Encodes a protein belonging to the subgroup of HMGB (high mobility group B) proteins that have a distinctive DNA-binding motif, the HMG-box domain. The motif confers non-sequence specific interaction with linear DNA and structure-specific binding to distorted DNA sites. The HMGB proteins are involved in the assembly of nucleoprotein complexes. Can be phosphorylated by CK2alpha. The mRNA is cell-t…	HMG_BETA_1,HMGB2,NFD02,NFD2	0.733898145454173	7.20137450973943e-08
AT1G20696	Encodes a protein belonging to the subgroup of HMGB (high mobility group B) proteins that have a distinctive DNA-binding motif, the HMG-box domain. The motif confers non-sequence specific interaction with linear DNA and structure-specific binding to distorted DNA sites. The HMGB proteins are involved in the assembly of nucleoprotein complexes. Can be phosphorylated by CK2alpha. The mRNA is cell-t…	HMGB3,NFD03,NFD3	1.27608102362379	9.60595920103298e-18
AT1G20760	EH domain containing protein.	AtEH1	0.198056566560655	0.00960862621918171
AT1G20770	coiled-coil protein;(source:Araport11)	NA	0.586230755190345	0.00463740034568587
AT1G20780	Encodes a protein containing a U-box and an ARM domain. Homozygous mutant seedlings have a seedling lethal phenotype with widespread cell death lesions throughout the cotyledons and roots.	ATPUB44,PUB44,SAUL1	0.714125611549637	4.84303855501816e-13
AT1G20790	F-box family protein;(source:Araport11)	NA	6.43260611894469	2.64500807234503e-06
AT1G20850	Cysteine peptidase. Enzyme activity detected in leaf.	XCP2	0.65316953695199	2.52600206404136e-06
AT1G20900	Encodes an AT hook domain containing protein that acts redundantly with SOB3 to modulate hypocotyl growth inhibition in response to light.	AHL27,ESC,ORE7	0.457899754632611	0.000165692670517851
AT1G20920	P-loop containing nucleoside triphosphate hydrolases superfamily protein;(source:Araport11)	RCF1	1.1354891252611	1.12602208108995e-31
AT1G20960	Similar to DEAD/DExH box ATP-dependent RNA helicase . Required for proper splicing of FLC. Mutants have reduced FLC levels and are early flowering.	BRR2,emb1507	0.350412163337106	5.12662104164013e-07
AT1G20970	calponin-like domain protein;(source:Araport11)	NA	0.594465824603918	6.18021518827859e-13
AT1G20980	Encodes a nuclear plant-specific protein with features characteristic of a transcriptional regulator, including a nuclear localization signal sequence, a plant-specific DNA binding domain (the SBP box), and a protein interaction motif (ankyrin repeats). It unctions as a transcriptional regulator that plays a role not only in sensitivity to FB1, but also in the development of normal plant architec…	ATSPL14,FBR6,SPL14,SPL1R2	0.517965915234054	7.12619232207965e-11
AT1G21050	MIZU-KUSSEI-like protein (Protein of unknown function, DUF617);(source:Araport11)	NA	0.823057038910403	7.51606257285709e-15
AT1G21060	Serine/Threonine-kinase, putative (Protein of unknown function, DUF547);(source:Araport11)	NA	0.615589047535886	2.12331225875962e-07
AT1G21070	Nucleotide-sugar transporter family protein;(source:Araport11)	URGT2	0.748277972681506	6.14997568935957e-07
AT1G21160	eukaryotic translation initiation factor 2 (eIF-2) family protein;(source:Araport11)	NA	0.813761328438219	1.25648607099232e-06
AT1G21170	Exocyst complex component SEC5;(source:Araport11)	SEC5B	0.253486947056536	0.0409969707474724
AT1G21200	sequence-specific DNA binding transcription factor;(source:Araport11)	NA	1.18066453775224	6.81171255911101e-08
AT1G21360	glycolipid transfer protein 2;(source:Araport11)	GLTP2	1.36941944004796	0.000853283692553968
AT1G21370	transmembrane protein;(source:Araport11)	NA	0.575454899128099	1.95295865439888e-05
AT1G21400	Thiamin diphosphate-binding fold (THDP-binding) superfamily protein;(source:Araport11)	NA	2.04836738112758	1.84089151708028e-74
AT1G21610	wound-responsive family protein;(source:Araport11)	UBN1	0.458839474883488	8.58664169750141e-05
AT1G21651	zinc ion binding protein;(source:Araport11)	NA	0.344552525999421	0.0476724250252303
AT1G21670	DPP6 amino-terminal domain protein;(source:Araport11)	NA	0.526385484527836	6.83651518595642e-05
AT1G21680	DPP6 N-terminal domain-like protein;(source:Araport11)	NA	1.06773959050309	1.87980965348115e-28
AT1G21730	P-loop containing nucleoside triphosphate hydrolases superfamily protein;(source:Araport11)	Kin7.1	0.564497197270272	4.22090823573638e-07
AT1G21740	DUF630 family protein, putative (DUF630 and DUF632);(source:Araport11)	NA	1.08733053270361	1.86228709071324e-11
AT1G21780	BTB/POZ domain-containing protein. Contains similarity to gb:AJ000644 SPOP (speckle-type POZ protein) from Homo sapiens and contains a PF:00651 BTB/POZ domain. ESTs gb:T75841, gb:R89974, gb:R30221, gb:N96386, gb:T76457, gb:AI100013 and gb:T76456 come from this gene;supported by full-length. Interacts with CUL3A and CUL3B.	NA	0.518309938477641	1.01621146609451e-08
AT1G21830	hypothetical protein;(source:Araport11)	NA	0.901469684037158	1.67845252823376e-13
AT1G21840	Encodes a urease accessory protein which is essential for the activation of plant urease.	UREF	1.41169245592791	8.0827908922786e-10
AT1G21890	nodulin MtN21-like transporter family protein	UMAMIT19	3.08686667657552	0.0440304857614119
AT1G21920	MRF1 is related to SET7/9 proteins but contains an atypical SET domain. It is expressed in phloem and mutants have a weak late flowering phenotype. Phosphatidylinositol 4-phosphate 5-kinase (PIP5K) enzyme family member.	MRF1	0.497551365687126	3.31780841122723e-11
AT1G21980	Type I phosphatidylinositol-4-phosphate 5-kinase. Preferentially phosphorylates PtdIns4P. Induced by water stress and abscisic acid in Arabidopsis thaliana. Expressed in procambial cells of leaves, flowers and roots. A N-terminal Membrane Occupation and Recognition Nexus (MORN)affects enzyme activity and distribution.	ATPIP5K1,ATPIPK1,PIP5K1	2.25056236682697	7.67850717885613e-85
AT1G22060	sporulation-specific protein;(source:Araport11)	NA	0.514956447393431	3.9172873341284e-10
AT1G22110	structural constituent of ribosome;(source:Araport11)	NA	1.89217586862077	0.00190599493586346
AT1G22180	Sec14p-like phosphatidylinositol transfer family protein;(source:Araport11)	NA	0.454884550259612	0.0110039652043734
AT1G22190	The gene encodes a putative transcription factor belongings to the abiotic stress-associated DREB A-6 clade. The mRNA is cell-to-cell mobile.	RAP2.4,WIND2	0.234512780954248	0.0194733349376869
AT1G22250	hypothetical protein;(source:Araport11)	NA	1.15927378368745	0.00308976727704425
AT1G22270	Encodes SMO2 (Small Organ 2). Modulates progression of cell division during organ growth.	AtTRM112b,TRM112b	0.520997093129014	0.00224975654491184
AT1G22280	Encodes a phytochrome-associated protein, PAPP2C (phytochrome-associated protein phosphatase type 2C). PAPP2C interacts in the nucleus with phyA (phytochrome A) and phyB. Functions as a regulator of phytochrome-interacting factor PIF3 by dephosphorylating phytochromes in the nucleus.	PAPP2C	0.68857527124561	2.10023193694457e-07
AT1G22300	Encodes a 14-3-3 protein. This protein is reported to interact with the BZR1 transcription factor involved in brassinosteroid signaling and may affect the nucleocytoplasmic shuttling of BZR1. Might act as a stabilization factor to mediate the oligomerization of REM on the plasma membrane.	14-3-3EPSILON,GF14_EPSILON,GRF10	0.222426905651732	0.00254058327917262
AT1G22330	RNA-binding (RRM/RBD/RNP motifs) family protein;(source:Araport11)	NA	0.818648714961456	7.77313414202819e-06
AT1G22360	UDP-glucosyl transferase 85A2;(source:Araport11)	AtUGT85A2,UGT85A2	0.651212072790194	1.83659634038711e-11
AT1G22440	Zinc-binding alcohol dehydrogenase family protein;(source:Araport11)	NA	0.456116083918241	0.00707742069300022
AT1G22500	Gene encodes a putative C3HC4-type RING zinc finger factor. it is induced in response to light and ascorbate stimulus.	AtATL15,ATL15	0.930345129908213	1.75689868033131e-15
AT1G22530	PATLs belong to a family of proteins having a Golgi dynamics (GOLD) domain in tandem with the Sec14p-like domain. PATLs are auxin regulated. Quadruple mutants (patl2456) show altered PIN1 lateralization in root endodermis cells.	PATL2	1.7627631669601	1.87888828328147e-70
AT1G22620	SAC domain phosphoinositide (3,5)P2 phosphatase. Colocalized with a Golgi Marker. Required for normal cell morphogenesis, cell wall synthesis, and actin organization.	ATSAC1,SAC1	0.258790888159915	0.00425609202812895
AT1G22640	MYB-type transcription factor (MYB3) that represses phenylpropanoid biosynthesis gene expression	ATMYB3,MYB3	0.924743151457765	7.28182646167062e-09
AT1G22730	MA3 domain-containing protein;(source:Araport11)	MRF2	0.442781591066034	2.41256933751956e-06
AT1G22740	GTP-binding protein Rab7	ATRABG3B,RAB7,RAB75,RABG3B	1.48383322423491	3.0924322440982e-14
AT1G22790	Low affinity potassium transport system protein;(source:Araport11)	NA	1.15421665569975	1.83105068487389e-15
AT1G22860	Vacuolar sorting protein 39;(source:Araport11)	VPS3	0.247511616539224	0.0109198661519652
AT1G22870	One of two paralogs in Arabidopsis.Loss of both SCYL2B and SCYL2A results in severe growth defects.	SCYL2A	0.316159530941403	0.00782992873967932
AT1G22880	cellulase 5;(source:Araport11)	ATCEL5,ATGH9B4,CEL5	1.17248361983076	5.87810371462017e-05
AT1G22882	Encodes a member of the mid-SUN subfamily of SUN-domain proteins that is localized to both the nuclear envelope and the ER. It is involved in early seed development and nuclear morphology. Secreted peptide which functions in plant growth and pathogen defense.	AtSUN3,SUN3	0.444649895373315	0.00394377588939002
AT1G22930	T-complex protein 11;(source:Araport11)	NA	0.449610520562927	6.42687876958201e-11
AT1G23000	Heavy metal transport/detoxification superfamily protein;(source:Araport11)	NA	1.52212621140696	3.34043370860551e-07
AT1G23020	Encodes a ferric chelate reductase whose transcription is regulated by FIT1. Expressed in the root, shoot, flower and cotyledon.	ATFRO3,FRO3	1.14734555096866	5.54759947037787e-39
AT1G23030	Encodes a plant U-Box protein that is capable of binding and ubiquitinating a variety of targets including MYC2,LRR1,KIN and acting as an E3 ligase. Regulates a number of physiological hormonal and environment al responses via selective degradation of targets.Unlike PUB10, its closest homolog in Arabidopsis, it does not appear to play a major role in the MeJA-mediated response.	PUB11	0.836422275540213	4.01871826699477e-15
AT1G23050	hydroxyproline-rich glycoprotein family protein;(source:Araport11)	NA	1.0344095699759	0.0106078136378392
AT1G23052	other_RNA;(source:Araport11)	NA	3.69183176334223	1.4863667853496e-08
AT1G23060	hypothetical protein;(source:Araport11)	MDP40	3.58497488901228	6.25219104547666e-18
AT1G23080	Encodes a novel component of auxin efflux that is located apically in the basal cell and is involved during embryogenesis in setting up the apical-basal axis in the embryo. It is also involved in pattern specification during root development. In roots, it is expressed at lateral and basal membranes of provascular cells in the meristem and elongation zone, whereas in the columella cells it coincid…	ATPIN7,PIN7	0.446037051592466	8.28029279540142e-05
AT1G23090	Encodes AST91 mRNA for sulfate transporter.	AST91,SULTR3	0.716942942924641	8.73739613433579e-11
AT1G23160	Acyl acid amido synthetase involved in conjugation of an amino acid to a plant hormone, a reaction that regulates free hormone concentration and downstream responses. Can also conjugate chorismate, a precursor of aromatic amino acids and salicylic acid, to cysteine and glutamate, respectively.	NA	3.04980687492276	1.74095274715549e-09
AT1G23260	MMZ1/UEV1A encodes a protein that may play a role in DNA damage responses and error-free post-replicative DNA repair by participating in lysine-63-based polyubiquitination reactions. UEV1A can form diubiquitin and triubiquitin chains in combination with UBC13A/UBC35 in vitro. It can also functionally complement an mms2 mutation in budding yeast, both by increasing mms2 mutant viability in the pre…	MMZ1,UEV1A	0.387377725413486	0.0116997602963587
AT1G23290	Encodes a ribosomal protein L27A, a constituent of the large subunit of the ribosomal complex. Regulated by TCP20. The mRNA is cell-to-cell mobile.	RPL27A,RPL27AB	0.36365991887173	2.06868894583213e-07
AT1G23380	homeodomain transcription factor KNAT6, belonging to class I of KN transcription factor family (which also includes KNAT1 and KNAT2). Expression is increased in as and bop1 leaf mutants.	KNAT6,KNAT6L,KNAT6S	0.406638627766703	0.00978610697770754
AT1G23440	Peptidase C15, pyroglutamyl peptidase I-like protein;(source:Araport11)	NA	0.655962207876592	1.2014880474241e-10
AT1G23460	Pectin lyase-like superfamily protein;(source:Araport11)	NA	0.391259219209358	0.023072127842143
AT1G23490	Gene encoding ADP-ribosylation factor and similar to other ARFs and ARF-like proteins. A member of ARF GTPase family. Arabidopsis has 21 known members, known to be essential for vesicle coating and uncoating and functions in GTP-binding. The gene is shown to play a role in cell division, cell expansion and cellulose production using antisense construct.	ARF1,ATARF,ATARF1,ATARFA1A	0.470014098388936	1.39927341212036e-09
AT1G23530	transmembrane protein;(source:Araport11)	NA	0.768562691019611	0.0131170548092309
AT1G23710	hypothetical protein (DUF1645);(source:Araport11)	NA	2.05650343615924	1.62532638820624e-17
AT1G23730	beta carbonic anhydrase 3;(source:Araport11)	ATBCA3,BCA3	1.40306967393017	0.0170979810588645
AT1G23780	F-box family protein;(source:Araport11)	NA	0.410700505022485	0.000210392200741071
AT1G23800	Encodes a mitochondrial aldehyde dehydrogenase; nuclear gene for mitochondrial product.	ALDH2B,ALDH2B7	1.24392577064881	5.65925293730014e-47
AT1G23820	Spermidine synthase.	SPDS1	0.362295666533344	1.25381045730085e-05
AT1G23860	Encodes a 9G8-like serine-arginine rich (SR) protein that interacts in vivo with U1-70K, a U1 small nuclear ribonucleoprotein 70-kDa protein that is involved in nuclear precursor mRNA processing. Barta et al (2010) have proposed a nomenclature for Serine/Arginine-Rich Protein Splicing Factors (SR proteins): Plant Cell. 2010, 22:2926.	At-RSZ21,RSZ21,RSZP21,SRZ-21,SRZ21	0.552439535989647	6.48688193396062e-08
AT1G23870	Encodes an enzyme putatively involved in trehalose biosynthesis. The protein has a trehalose synthase (TPS)-like domain that may or may not be active as well as a trehalose phosphatase (TPP)-like domain. The mRNA is cell-to-cell mobile.	ATTPS9,TPS9,TPS9	0.908781712352243	1.35096255269389e-33
AT1G23900	Encodes large subunit of the heterotetrameric adaptor protein complex AP-1. AP-1 is required for clathrin coated vesicles budding from the trans-Golgi network or plasma membrane.	GAMMA-ADAPTIN_1,Gamma-ADR	0.226639447128847	0.00483863006244804
AT1G23960	hypothetical protein (DUF626);(source:Araport11)	NA	0.97424765012341	5.80591686899276e-16
AT1G24050	RNA-processing, Lsm domain-containing protein;(source:Araport11)	NA	0.755228747999805	1.16058710790144e-11
AT1G24120	encodes a DnaJ-like protein similar to ARG1 and ARL2 that are both involved in root and hypocotyl gravitropism response. However, null mutation in this gene does not result in defects in gravitropism. Gene is expressed in all tissues examined.	ARL1	0.833304039003305	4.37235363812072e-09
AT1G24180	Arabidopsis thaliana pyruvate dehydrogenase E1a-like subunit. 81% identical to a previously characterized Arabidopsis mitochondrial PDH E1a-subunit, At1g59900. Serine 296 phosphorylation of IAR4 has critical function in root hair formation and root development. Changing Ser296 in IAR4 to Ala resulted in a phenotype intermediate between mutant and wild-type, while substitution to Asp was either le…	IAR4	0.241784635154986	0.00304107925640584
AT1G24190	Enhances AtERF7-mediated transcriptional repression. RNAi lines show ABA hypersensitivity. Interacts with ERF7 and HDA19.	ATSIN3,SIN3,SNL3	0.7028246419371	2.436716030266e-17
AT1G24300	GYF domain-containing protein;(source:Araport11)	NA	0.264523457373095	0.000215148680030252
AT1G24320	Six-hairpin glycosidases superfamily protein;(source:Araport11)	NA	1.22599320116173	1.70752485955534e-08
AT1G24440	RING/U-box superfamily protein;(source:Araport11)	NA	0.667468032412856	1.04237417381905e-07
AT1G24460	Encodes a novel protein that co-immunoprecipitates with SYP41. It is involved in vacuolar trafficking and salt tolerance, potentially via a role in vesicle fusion and in maintaining TGN structure or identity. Mutants display delayed formation of the Brefeldin A (BFA) compartment in cotyledons upon application of BFA.	TNO1	0.230692202221037	0.0153070008360953
AT1G24510	TCP-1/cpn60 chaperonin family protein;(source:Araport11)	NA	0.187877935525215	0.019897069066052
AT1G24560	Effector molecule of the plant-unique RAB5, ARA6. Acts in the vacuolar/endocytic trafficking pathway with canonical RAB5 and SYP. Promotes recruitment of VSP9a onto the endosome, which is required for efficient RAB5 activation. Colocalizes with RAB5 on endosomes, where it coordinates transport with canonical RAB5.	PUF2	0.241496022247182	0.0424792844487714
AT1G24764	Member of the MAP70 protein family.	ATMAP70-2,MAP70-2	1.00730263380626	4.62707112957301e-12
AT1G24880	Similar to bacterial lipid A biosynthetic gene.	AtLpxC2,LpxC2	1.18176180788325	2.32610811598633e-25
AT1G24881	F-box family protein;(source:Araport11)	NA	20.4973557122046	6.01930983308865e-07
AT1G25098	Natural antisense transcript overlaps with AT1G25097;(source:Araport11)	NA	1.03574786026928	2.53798646543491e-40
AT1G25230	Calcineurin-like metallo-phosphoesterase superfamily protein;(source:Araport11)	NA	1.83469415119644	8.01140334178795e-71
AT1G25260	Involved in male gamete development. Trans-acting factor in the assembly of the pre-60S particle.	NA	0.653479820342724	1.02114401605493e-05
AT1G25275	Thionin-like gene involved in resistance against the beet cyst nematode (Heterodera schachtii).	NA	0.865121529140483	0.00303339768210901
AT1G25320	Leucine-rich repeat protein kinase family protein;(source:Araport11)	NA	1.37941352254798	4.13217122959616e-23
AT1G25370	hypothetical protein (DUF1639);(source:Araport11)	NA	1.36489319386643	0.00417612472716374
AT1G25470	encodes a member of the ERF (ethylene response factor) subfamily B-6 of ERF/AP2 transcription factor family. The protein contains one AP2 domain. There are 12 members in this subfamily including RAP2.11.	CRF12	0.949146346916136	5.06246816280513e-16
AT1G25480	Encodes a phosphorylation-dependent anion channel that can mediate malate release from the vacuole and is required for stomatal closure in response to abscisic acid.	ALMT4	0.912391938409282	7.48123274230953e-07
AT1G25500	Plasma-membrane choline transporter family protein;(source:Araport11)	NA	0.455693807710823	0.0156368116370474
AT1G25540	Encodes a nuclear protein that acts in a phyB pathway (but downstream of phyB) and induces flowering in response to suboptimal light conditions. PFT1 promotes flowering in CO dependent and independent pathways and integrates several environmental stimuli, such as light quality and JA-dependent defenses. Mutants are hypo-responsive to far-red and hyper-responsive to red light and flower late under…	MED25,PFT1	0.450111217840271	1.35099639565933e-06
AT1G25550	Member of HHO/HRS GARP type transcriptional repressor family. Involved in Pi uptake and Pi starvation signaling. Transcriptional repressors that functions with other NIGT genes as an important hub in the nutrient signaling network associated with the acquisition and use of nitrogen and phosphorus.	HHO3,NIGT1.1	0.537054753893047	1.75765306247072e-06
AT1G25560	Encodes a member of the RAV transcription factor family that contains AP2 and B3 binding domains. Involved in the regulation of flowering under long days. Loss of function results in early flowering. Overexpression causes late flowering and repression of expression of FT. Novel transcriptional regulator involved in ethylene signaling. Promoter bound by EIN3. EDF1 in turn, binds to promoter elemen…	AtTEM1,EDF1,TEM1	2.71960761558801	2.5180698420262e-170
AT1G25570	Di-glucose binding protein with Leucine-rich repeat domain-containing protein;(source:Araport11)	NA	0.3748199951244	9.76670335370164e-06
AT1G25580	Encodes suppressor of gamma response 1 (SOG1), a putative transcription factor governing multiple responses to DNA damage.	ANAC008,SOG1	0.385792229486741	0.00552527334278641
AT1G25682	coiled-coil protein (DUF572);(source:Araport11)	CWC16a	1.11203993712479	3.05835358766522e-09
AT1G26218	Natural antisense transcript overlaps with AT1G26220. Has been identified as a translated small open reading frame by ribosome profiling.	sORF14	0.896697246826662	0.0202848659083212
AT1G26260	Encodes CIB5 (cryptochrome-interacting basic-helix-loop-helix). Related to CIB1 (AT4G34530). CIB5 interacts with CRY2 and forms heterodimer with CIB1 in vitro. Regulates flowering time redundantly with CIB1.	CIB5	1.01050273040207	0.000123937656055951
AT1G26270	Phosphatidylinositol 3- and 4-kinase family protein;(source:Araport11)	NA	2.5631656731818	1.52061090899169e-210
AT1G26290	hypothetical protein;(source:Araport11)	NA	3.55284167367413	0.0470158849524129
AT1G26300	BSD domain-containing protein;(source:Araport11)	NA	0.46905734793962	0.0032110038611049
AT1G26440	Encodes a ureide permease, uptake assays in yeast mutants indicated the longer splice variant is a cellular importer for allantoin, uracil and xanthine. Encodes 2 splice variants, UPS5L and UPS5S, which under nonstress conditions may function in allantoin degradation for nutrient recycling, whereas under stress, both genes may be involved in vesicular export allowing allantoin translocation from …	ATUPS5,UPS5,UPS5	0.546243441305827	1.00992854216415e-05
AT1G26570	UDP-glucose dehydrogenase 1;(source:Araport11)	ATUGD1,UGD1	0.477535738751923	0.00464460270508033
AT1G26580	ELM2 domain protein;(source:Araport11)	NA	1.01253302782245	3.5866204205308e-30
AT1G26620	T-box transcription factor, putative (DUF863);(source:Araport11)	NA	0.646733863820259	1.12144621088562e-05
AT1G26640	Encodes a cytosolic isopentenyl phosphate kinase that plays an important role in regulating the formation of both MVA (mevalonic acid) and MEP (methylerythritol phosphate) pathway-derived terpenoid compounds by controlling the ratio of IP/DMAP to IPP/DMAPP. IPP and DMAPP are the universal C5 building blocks of all natural terpenoids. IPK enhances terpenoid formation by returning IP/DMAP to the te…	IPK	0.437200094822905	0.0031659072032276
AT1G26665	Mediator complex, subunit Med10;(source:Araport11)	NA	1.57745096588424	3.48877869325497e-77
AT1G26670	member of VTI1 Gene Family. Normally localizes to the transgolgi network and plasma membrane. A dominant mutation (zip1) alters the subcellular localization of VTI12 and suppresses loss of function mutation (zag1) of VTI11. Interacts with members of the SYP family. Involved in protein trafficking to protein storage vacuoles.	ATVTI12,VTI12,VTI1B	0.598520506576673	1.36221488493139e-08
AT1G26730	EXS (ERD1/XPR1/SYG1) family protein;(source:Araport11)	NA	1.1252195197815	0.000115833720937095
AT1G26780	Encodes LOF1 (LATERAL ORGAN FUSION1), a MYB-domain transcription factor expressed in organ boundaries. Functions in boundary specification, meristem initiation and maintenance, and organ patterning. Also see LOF2 (At1g69560).	AtMYB117,LOF1,MYB117	2.87980323500586	9.22249365662064e-10
AT1G26800	MPSR1 is cytoplasmic E3 ligase that senses misfolded proteins independently of chaperones and targets those proteins for degradation via the 26S proteasome. Involved in the regulation of the homeostasis of sensor NLR immune receptors.	MPSR1	0.583893647911949	0.0489443619796514
AT1G26830	Cullin, putative, similar to Cullin homolog 3 (CUL-3) SP:Q13618, GI:3639052 from (Homo sapiens); contains Pfam profile PF00888: Cullin family. Interacts with other components of E3 ligase complex suggesting it functions in RUB-modification. Forms complexes with BTB domain proteins forming a novel class of E3-based ubiquitin protein-ligase complexes. Mutant is early flowering and has a reduced sen…	ATCUL3,ATCUL3A,CUL3,CUL3A	0.366544708988304	1.96131761996871e-05
AT1G26850	S-adenosyl-L-methionine-dependent methyltransferases superfamily protein;(source:Araport11)	NA	0.639202028910478	2.15044629037902e-19
AT1G26890	FBD, F-box and Leucine Rich Repeat domains containing protein;(source:Araport11)	NA	3.12583621903298	0.00021819366820406
AT1G26930	Galactose oxidase/kelch repeat superfamily protein;(source:Araport11)	NA	0.546813384224565	0.0311447691818005
AT1G26940	Cyclophilin-like peptidyl-prolyl cis-trans isomerase family protein;(source:Araport11)	NA	0.485505153389937	0.0294229035382963
AT1G26960	Encodes a homeodomain leucine zipper class I (HD-Zip I) protein. Participates in the gene regulatory network controlling root branching by mediating the regulation of LAX3 by ARF7/19.	AtHB23,HB23	1.96789027316322	1.69555276696617e-10
AT1G27000	GRIP/coiled-coil protein, putative (DUF1664);(source:Araport11)	NA	0.495574631419412	2.74634818050148e-05
AT1G27020	plant/protein;(source:Araport11)	NA	1.71048604542996	2.15945856676509e-17
AT1G27070	Encodes a chloroplast-localized CBM48-containing protein that is involved in starch granule initiation. PTST2 delivers suitable oligosaccharide substrates to starch synthase 4 (SS4). Mutants lacking PTST2 have fewer starch granules in leaf chloroplasts than the wild type. PTST2 is the Arabidopsis ortholog of the rice FLO6 protein.	PTST2	0.476843412126048	0.00841774840173145
AT1G27090	glycine-rich protein;(source:Araport11)	NA	0.481985296883885	1.12877145077176e-11
AT1G27130	Encodes glutathione transferase belonging to the tau class of GSTs. Naming convention according to Wagner et al. (2002). GSTU13 acts in the pathogen triggered pathway for indole glucosinolate metabolisms that involves also PENETRATION2 myrosinase. It is likely the enzyme that conjugates GSH with unstable indol-3-ylmethyl-ITCs formed upon PEN2-mediated IG hydrolysis, particularly in the branch of …	ATGSTU13,GST12,GSTU13	0.319310763935345	0.0312265824884029
AT1G27150	Tetratricopeptide repeat (TPR)-like superfamily protein;(source:Araport11)	NA	0.399470332662444	0.000104439136021284
AT1G27170	transmembrane receptors / ATP binding protein;(source:Araport11)	NA	0.331533322969109	0.0105421770408544
AT1G27180	disease resistance protein (TIR-NBS-LRR class);(source:Araport11)	NA	0.329282715913769	0.00278131721992142
AT1G27190	Activated by TCP8/14/15/22, involved in modulation of GA-dependent stamen filament elongation.	BIR3	0.373522825189967	3.1840095071467e-05
AT1G27210	ARM repeat superfamily protein;(source:Araport11)	NA	0.591075952292474	1.83347791627106e-08
AT1G27300	transmembrane protein;(source:Araport11)	NA	0.658979841984038	0.000230804232512786
AT1G27320	Encodes a histidine kinases, a cytokinin receptor that controls cytokinin-mediated leaf longevity through a specific phosphorylation of the response regulator, ARR2. The mRNA is cell-to-cell mobile.	AHK3,HK3	0.130197225766585	0.046834723137515
AT1G27420	Galactose oxidase/kelch repeat superfamily protein;(source:Araport11)	NA	1.36826012778032	3.55230382238295e-06
AT1G27430	GYF domain-containing protein;(source:Araport11)	NA	0.366627489275542	2.95127362813037e-06
AT1G27450	Adenosine phosphoribosyl transferase(E.C:2.4.2.7), involved in the one-step salvage of adenine to AMP.	APT1,ATAPT1	0.418991513100343	1.50181002167834e-05
AT1G27500	Tetratricopeptide repeat (TPR)-like superfamily protein;(source:Araport11)	KLCR3	0.723611893942965	4.82910085736456e-05
AT1G27510	Encodes one of the two plastid proteins EXECUTER (EX1, AT4G33630) and EX2 (AT1G27510). Mediates singlet oxygen induced programmed cell death.	EX2	0.308384999688091	0.000690024628254897
AT1G27520	Glycosyl hydrolase family 47 protein;(source:Araport11)	MNS5	0.588697727853513	6.92160096165241e-11
AT1G27600	Encodes a member of the GT43 family glycosyltransferases involved in glucuronoxylan biosynthesis: AT2G37090 (IRX9) and AT1G27600 (IRX9-L or I9H, IRX9 homolog); AT4G36890 (IRX14) and AT5G67230 (IRX14-L or I14H, IRX14 homolog). They form two functionally non-redundant groups essential for the normal elongation of glucuronoxylan backbone. I9H functions redundantly with IRX9, I14H is redundant with I…	I9H,IRX9-L	0.748356178600668	4.15619619427502e-10
AT1G27630	cyclin T 1;(source:Araport11)	CYCT1	0.836473224914311	2.83749470065734e-15
AT1G27650	U2 auxiliary factor small subunit. The atU2AF35a protein and its homolog, atU2AF35b, contain most of the conserved domains of hsU2AF35, including the psiRRM, one RS domain, two zinc fingers, and the two regions for interacting with U2AF large subunit. Both proteins lack the stretch of glycines present in human U2AF35. The sequences are overall 83% identical, and each Arabidopsis homolog shows app…	ATU2AF35A	0.551037912630062	7.06444043923043e-13
AT1G27670	transmembrane protein;(source:Araport11)	NA	1.6979151460296	3.52151645637844e-29
AT1G27752	Ubiquitin system component Cue protein;(source:Araport11)	NA	0.543701799610581	1.30967926270181e-08
AT1G27770	Encodes a chloroplast envelope Ca2+-ATPase with an N-terminal autoinhibitor.	ACA1,PEA1	1.22422008178789	3.90482168547372e-41
AT1G27921	Natural antisense transcript overlaps with AT1G27920;(source:Araport11)	NA	0.61331323333379	1.29839298246001e-06
AT1G27980	Encodes an ER-localized sphingoid long-chain base-1-phosphate lyase involved in the dehydration stress response.	ATDPL1,DPL1	0.664635795263881	2.41459839109406e-09
AT1G28010	Encodes an ATP-binding cassette (ABC) transporter. Expressed in the vascular tissue of primary stem.	ABCB14,ATABCB14,MDR12,PGP14	0.609484252402807	3.83275114105214e-08
AT1G28040	RING/U-box superfamily protein;(source:Araport11)	NA	4.79556736340555	0.0030625592561444
AT1G28050	B-box type zinc finger protein with CCT domain-containing protein;(source:Araport11)	BBX13	1.75332805418058	5.56815150988073e-23
AT1G28070	ATP-dependent RNA helicase;(source:Araport11)	NA	1.14749517005695	0.00188089134744245
AT1G28100	hypothetical protein;(source:Araport11)	NA	0.667742229916883	6.01496580771851e-11
AT1G28260	Telomerase activating protein Est1;(source:Araport11)	NA	0.593151657260717	1.08982154966533e-10
AT1G28290	Encodes an atypical arabinogalactan protein that is localized to the plasma membrange. AGP31 is highly expressed in flowers and vascular tissue and is repressed by jasmonic acid. AGP31 may play a role in vascular tissue function during defense and development.	AGP31	0.636054690522066	1.04600106145369e-10
AT1G28320	Mutants in this gene are defective in the processing of pre-glyoxysomal malate dehydrogenase (pre-gMDH) to gMDH.	AtDEG15,DEG15	0.509638092936565	2.40094355158627e-09
AT1G28330	dormancy-associated protein (DRM1)	AtDRM1,DRM1,DYL1	3.58452339653485	2.13544354022809e-260
AT1G28410	myosin heavy chain-like protein;(source:Araport11)	NA	0.703476866231172	8.66918002286933e-07
AT1G28420	homeobox-1;(source:Araport11)	HB-1,RLT1	0.194996480838982	0.0233881596737722
AT1G28440	HAESA-like 1;(source:Araport11)	HSL1	0.34614185679577	3.65813209760466e-05
AT1G28470	NAC domain containing protein 10;(source:Araport11)	ANAC010,NAC010,SND3	1.1023848515663	0.0023639444203287
AT1G28520	VOZ transcription factor which acts as positive regulator of several salt-responsive genes. Functionally redundant in salt stress with VOZ2.	ATVOZ1,VOZ1	0.876643197050524	1.19882054213859e-14
AT1G28580	GDSL-motif esterase/acyltransferase/lipase. Enzyme group with broad substrate specificity that may catalyze acyltransfer or hydrolase reactions with lipid and non-lipid substrates.	NA	0.464294467639031	1.41799251611145e-09
AT1G28960	Encodes a ppGpp pyrophosphohydrolase.	ATNUDT15,ATNUDX15,NUDX15	0.339773684880271	0.00688377913117318
AT1G29020	Calcium-binding EF-hand family protein;(source:Araport11)	NA	1.37576837198998	0.000450140386782193
AT1G29025	Calcium-binding EF-hand family protein;(source:Araport11)	NA	2.99556981882704	1.33645034790721e-58
AT1G29050	Encodes a member of the TBL (TRICHOME BIREFRINGENCE-LIKE) gene family containing a plant-specific DUF231 (domain of unknown function) domain. TBL gene family has 46 members, two of which (TBR/AT5G06700 and TBL3/AT5G01360) have been shown to be involved in the synthesis and deposition of secondary wall cellulose, presumably by influencing the esterification state of pectic polymers. A nomenclature…	TBL38	1.51947595003882	4.79609178377324e-29
AT1G29090	Cysteine proteinases superfamily protein;(source:Araport11)	NA	3.62758306473592	3.12223922224464e-113
AT1G29100	Heavy metal transport/detoxification superfamily protein;(source:Araport11)	NA	3.81168856674095	0.0465210238908148
AT1G29120	Hydrolase-like protein family;(source:Araport11)	UP9	0.371861343721685	4.06234408784901e-06
AT1G29160	Encodes a DOF transcription factor involved in seed coat development. Regulates PRX2 and PRX25, involved in seed longevity.	COG1	0.905807482442797	0.00639204177847341
AT1G29195	PADRE protein up-regulated after infection by S. sclerotiorum.	NA	1.37295704570396	5.22930652469417e-05
AT1G29200	O-fucosyltransferase family protein;(source:Araport11)	NA	0.855314570902967	0.0489890254176267
AT1G29240	transcription initiation factor TFIID subunit, putative (DUF688);(source:Araport11)	NA	1.17278999690293	4.21103862757371e-15
AT1G29260	Encodes the peroxisomal targeting signal type 2 receptor that facilitates peroxisomal protein translocation. It recognizes proteins with the PTS2 consensus sequence (RLX5HL or a variant) within the first 30 or so amino acids. RNAi experiments suggest that PEX7 is necessary for the maintenance of glyoxysomal but not leaf peroxisomal function. The mRNA is cell-to-cell mobile.	ATPEX7,PEX7	0.476839474880615	4.35803921622096e-05
AT1G29280	member of WRKY Transcription Factor; Group II-e The mRNA is cell-to-cell mobile.	ATWRKY65,WRKY65	0.948871256261609	6.04701270514955e-15
AT1G29300	intracellular protein transporter, putative (DUF641);(source:Araport11)	UNE1	0.814358536038212	9.15132753069496e-08
AT1G29330	Encodes a protein similar in sequence to animal and yeast endoplasmic reticulum retention signal receptor. This protein can functionally complement the yeast homologue. Transcript is detected in flower buds, stems, root, and leaves.	AERD2,ATERD2,ERD2	0.425368569557843	0.0390636867332291
AT1G29350	RNA polymerase II degradation factor-like protein (DUF1296);(source:Araport11)	NA	0.676097425666773	5.44226906275848e-24
AT1G29357	Natural antisense transcript overlaps with AT1G29355;(source:Araport11)	NA	1.33575522181302	3.96127858914194e-27
AT1G29370	RNA polymerase II degradation factor-like protein (DUF1296);(source:Araport11)	NA	0.571336448077904	1.80936771729454e-16
AT1G29400	A member of mei2-like gene family, predominantly plant-based family of genes encoding RNA binding proteins with characteristic presence of a highly conserved RNA binding motif first described in the mei2 gene of the fission yeast S. pombe. In silico analyses reveal nine mei2 -like genes in A. thaliana. They were grouped into four distinct clades, based on overall sequence similarity and subfamily…	AML5,ML5	1.01453066973628	2.54315861843661e-43
AT1G29450	SAUR-like auxin-responsive protein family;(source:Araport11)	SAUR64	1.68706062145158	0.000624063401493993
AT1G29460	SAUR-like auxin-responsive protein family;(source:Araport11)	SAUR65	1.68938984722975	0.0179327210208714
AT1G29465	transmembrane protein;(source:Araport11)	NA	1.21633958988048	8.32022556477719e-05
AT1G29470	S-adenosyl-L-methionine-dependent methyltransferases superfamily protein;(source:Araport11)	NA	0.351144950231556	1.9779053629934e-05
AT1G29490	SAUR-like auxin-responsive protein family;(source:Araport11)	SAUR68	4.99808206489394	0.00231740986363322
AT1G29510	This locus was referred to as SAUR68 in PMID:17948056 but the nomenclature should be SAUR67.	SAUR67	0.720846238717008	0.00618097733017777
AT1G29520	AWPM-19-like family protein;(source:Araport11)	NA	0.265254513294315	0.0399579585124727
AT1G29760	Membrane protein involved in lipid droplet biogenesis primarily in pollen. The interaction motif on SEIPIN2 for VAP27-1 is restricted to the N-terminal 30 amino acids that contain an FFAT motif.	SEIPIN2	0.56765795192465	5.05684585545039e-09
AT1G29800	RING/FYVE/PHD-type zinc finger family protein;(source:Araport11)	NA	0.460728072005999	0.00180533247098868
AT1G29960	Peptidase S24/S26A/S26B/S26C family protein;(source:Araport11)	NA	1.00583734633359	0.0256605134728247
AT1G29970	60S ribosomal protein L18A-1;(source:Araport11)	RPL18AA	0.4990936499557	1.3109351944216e-06
AT1G29980	choice-of-anchor C domain protein, putative (Protein of unknown function, DUF642);(source:Araport11)	NA	1.5533052272469	1.81806433687863e-30
AT1G30080	Glycosyl hydrolase superfamily protein;(source:Araport11)	NA	0.43683363995559	0.0106560922976558
AT1G30090	Galactose oxidase/kelch repeat superfamily protein;(source:Araport11)	NA	0.800040138903229	6.29610916715399e-06
AT1G30200	F-box family protein;(source:Araport11)	NA	0.307988238417491	0.00183473927299028
AT1G30210	TCP family protein involved in heterochronic regulation of leaf differentiation.	ATTCP24,TCP24	0.287827826148286	0.0337137100097204
AT1G30230	Encodes a guanine nucleotide exchange factor that plays an important role in translation elongation. It is localized in the plasma membrane and cytosol. Mutants display ectopic lignin deposition as well as cell expansion defects	eEF-1Bb1,EF1Bb	0.666117956256323	2.76703269902888e-26
AT1G30270	Arabidopsis thaliana CBL-interacting protein kinase 23. CIPK23 serves as a positive regulator of the potassium transporter AKT1 by directly phosphorylating AKT1. CIPK23 is activated by the binding of two calcineurin B-like proteins, CBL1 and CBL9. The mRNA is cell-to-cell mobile.	ATCIPK23,CIPK23,LKS1,PKS17,SnRK3.23	0.703781256299574	2.0037655672491e-17
AT1G30280	Chaperone DnaJ-domain superfamily protein;(source:Araport11)	AUXILIN-LIKE7	1.67743818407459	1.85664322824301e-13
AT1G30282	Natural antisense transcript overlaps with AT1G30280;(source:Araport11)	NA	4.43208761263028	0.00998101059483294
AT1G30320	Remorin family protein;(source:Araport11)	NA	0.432726111869778	0.0278982873366365
AT1G30330	Encodes a member of the auxin response factor family. Mediates auxin response via expression of auxin regulated genes. Acts redundantly with ARF8 to control stamen elongation and flower maturation. Expression of ARF6 is controlled by miR167.	ARF6	0.673110043664652	4.99964410729171e-18
AT1G30420	member of MRP subfamily	ABCC11,ATMRP12,MRP12	0.862770468750084	6.01973085191201e-12
AT1G30440	Phototropic-responsive NPH3 family protein;(source:Araport11)	NA	0.515374613321098	4.90434491660534e-10
AT1G30510	Encodes a root-type ferredoxin:NADP(H) oxidoreductase.	ATRFNR2,RFNR2	1.10134338376523	1.4711683800879e-12
AT1G30540	Actin-like ATPase superfamily protein;(source:Araport11)	GNK	0.500574741474479	0.000739897907164999
AT1G30570	Encodes HERCULES2 (HERK2), a receptor kinase regulated by Brassinosteroids and required for cell elongation during vegetative growth.	HERK2	0.709284575238396	1.0496113750562e-11
AT1G30590	RNA polymerase I specific transcription initiation factor RRN3 protein;(source:Araport11)	NA	0.778881025089691	2.03374961519342e-17
AT1G30620	encodes a type-II membrane protein that catalyzes 4-epimerization of UDP-D-Xylose to UDP-L-Arabinose in vitro, the nucleotide sugar used by glycosyltransferases in the arabinosylation of cell wall polysaccharides and wall-resident proteoglycans.	HSR8,MUR4,UXE1	0.773886933865197	3.7849354428784e-06
AT1G30640	Ubiquitously expressed protein kinase.	NA	0.327608788236617	0.0298964983201174
AT1G30690	Sec14p-like phosphatidylinositol transfer family protein;(source:Araport11)	PATL4	1.00278314101715	1.14937955734002e-19
AT1G30750	TPRXL;(source:Araport11)	NA	0.767575670837235	0.00516716728891409
AT1G30755	elongation factor G, putative (DUF668);(source:Araport11)	PSI2	0.619753065082154	5.89009552617099e-05
AT1G30760	Encodes a BBE-like enzyme that acts in monolignol metabolism by catalyzing the oxidation of aromatic allylic alcohols, such as coumaryl-, sinapyl-, and coniferyl alcohol, to the corresponding aldehydes. The mRNA is cell-to-cell mobile.	AtBBE-like_13	0.787899492664698	1.56424645997032e-10
AT1G30810	JMJ18 encodes a novel JmjC domain- containing histone H3K4 demethylase. PHD finger-containing protein.	JMJ18	0.542703561403592	1.81339266139972e-05
AT1G30880	hypothetical protein;(source:Araport11)	NA	0.973453115669506	5.76569995547722e-22
AT1G30900	VACUOLAR SORTING RECEPTOR 6;(source:Araport11)	BP80-3,VSR3,VSR6	0.400162484660752	0.0137210263733596
AT1G31040	ORE15 is a nuclear localized member of the PLATZ family of transcription factors. Based on over expression and loss of function phenotypes, ORE15 functions in regulation of leaf cell proliferation and senescence.	ORE15	1.77966334666615	0.000890671191378236
AT1G31070	Encodes a protein that functions as an N-acetylglucosamine-1-phosphate uridylyltransferase that catalyzes the formation of UDP-N-acetylglucosamine (UDP-GlcNAc). This is an essential precursor for glycolipid and glycoprotein synthesis and is also used for regulatory protein modification in signaling pathways. The enzyme can also catalyze the reverse reaction using both UDP-GlcNAc and the less comm…	GLCNA.UT1,GlcNAc1pUT1	0.372058211165101	0.00682861589444886
AT1G31175	cytochrome C oxidase biogenesis Cmc1-like protein;(source:Araport11)	NA	0.477490364336646	0.00149984332404098
AT1G31240	Bromodomain transcription factor;(source:Araport11)	NA	0.845765230103575	0.00543151392599725
AT1G31290	ARGONAUTE 3;(source:Araport11)	AGO3	1.7202042315652	1.54688175120993e-19
AT1G31310	hydroxyproline-rich glycoprotein family protein;(source:Araport11)	NA	0.80255799673322	0.0310760237467723
AT1G31350	KAR-UP F-box 1;(source:Araport11)	KUF1	0.47617412208487	0.000238546394783847
AT1G31480	encodes a novel protein that may be part of a gene family represented by bovine phosphatidic acid-preferring phospholipase A1 (PA-PLA1)containing a putative transmembrane domain. SGR2 is involved in the formation and function of the vacuole.	SGR2	0.586420665247542	7.74174122548147e-08
AT1G31770	ATP-binding cassette 14;(source:Araport11)	ABCG14,AtABCG14	0.724165302614936	7.4420916798468e-21
AT1G31812	Acyl-CoA-binding protein. Bind acyl-CoA esters and protect acyl-CoAs from degradation by microsomal acyl-hydrolases. Plays a role in determining seed oil content.	ACBP,ACBP6,AtACBP6	1.49640549147243	1.4294270730276e-72
AT1G31830	Encodes POLYAMINE UPTAKE TRANSPORTER 2, an amino acid permease family protein.	AtPUT2,PQR2,PUT2	0.458294404599938	1.26075816685126e-05
AT1G31850	S-adenosyl-L-methionine-dependent methyltransferases superfamily protein;(source:Araport11)	NA	1.38795765490373	4.13467042484698e-60
AT1G31880	Belongs to five-member BRX gene family. Arabidopsis BRX genes share high levels of similarity among each others, with several conserved domains. The most distinct is BRX domain - highly conserved in all BRX genes among distantly related species. This protein-protein interaction domain is required and sufficient for BRX activity. BRX encodes a key regulator of cell proliferation and elongation in …	BRX,NLM9	0.771345930206095	0.0048560314112828
AT1G31935	Has been identified as a translated small open reading frame by ribosome profiling.	sORF12	0.810010121320217	0.0135053350076437
AT1G31950	Sesterterpene synthase which produces various sesterpne backbones bia type-A cyclization mechanism.	NA	1.29700214347893	5.0639241079579e-09
AT1G31970	DEA(D/H)-box RNA helicase family protein;(source:Araport11)	RH5,STRS1	0.552499189091312	2.49821950708704e-07
AT1G32090	early-responsive to dehydration stress protein (ERD4);(source:Araport11)	OSCA1.8	0.425675225211711	1.43706440658695e-07
AT1G32100	Encodes a pinoresinol reductase involved in lignan biosynthesis. Expressed strongly in roots and less strongly in stems. Shows specificity for pinoresinol and not lariciresinol.	ATPRR1,PRR1	0.715815511109649	3.50917190101777e-10
AT1G32120	serine/threonine-protein phosphatase 7 long form-like protein;(source:Araport11)	NA	1.58388788439482	5.12852390740891e-14
AT1G32127	plant viral-response family protein;(source:Araport11)	NA	0.357289768987842	0.0180248958941518
AT1G32130	The C-terminal portion of this protein has high homology to the C-termini of the IWS1 (Interacts With Spt6) proteins found in yeast and humans. Interacts with transcription factor BES1. Involved in brassinosteroid-regulated gene expression.	ATIWS1,HNI9,IWS1	0.768985083771976	2.76416949039134e-16
AT1G32150	Encodes a G group bZIP transcription factor family member that can bind cis elements with an ACGT core, such as G-box, Hex, C-box and As-1. The protein is localized in the nucleus and can homodimerize and can heterodimerize with other G group members.	AtbZIP68,bZIP68	0.303723262380131	0.0350165459593911
AT1G32170	xyloglucan endotransglycosylase-related protein (XTR4) The mRNA is cell-to-cell mobile.	XTH30,XTR4	1.13349052774221	2.93591038923954e-25
AT1G32210	Encodes protein involved in suppression of apoptosis. Complements a mammalian apoptosis suppressor mutation.	ATDAD1	0.680836795156773	0.000237182566074465
AT1G32230	Encodes a protein belonging to the (ADP-ribosyl)transferase domain-containing subfamily of WWE protein-protein interaction domain protein family. Superoxide radicals are necessary and sufficient to propagate cell death or lesion formation in rcd1 mutants. Without stress treatment, RCD1 is localized in the nucleus. Under high salt or oxidative stress, RCD1 is found not only in the nucleus but also…	ATP8,AtRCD1,CEO,CEO1,RCD1,RIMB1	0.938540811055823	1.37732155889027e-40
AT1G32260	envelope glycoprotein;(source:Araport11)	NA	0.670584658910562	0.0231351505526694
AT1G32310	Encodes a plant-specific negative regulator of the APC/C complex. It is expressed during embryogenesis and early plant development and plays a key role in organ size control. Mutants are defective in mitosis I of pollen development, resulting in pollen without sperm nuclei.	SAMBA	0.846813127515049	0.00467381914851074
AT1G32330	Member of Heat Stress Transcription Factor (Hsf) family. Negatively regulated by HSP90.2.	ATHSFA1D,HSFA1D	0.557273872975319	0.00050261967115021
AT1G32360	Zinc finger (CCCH-type) family protein;(source:Araport11)	NA	0.358389658661741	0.00530074945231478
AT1G32450	Transmembrane nitrate transporter. Involved in xylem transport of nitrate from root to shoot. Induced in response to high and low concentrations of nitrate. Not involved in nitrate uptake. Expressed in root pericycle cells under the control of MYB59. Also functions as a proton-coupled H+/K+ antiporter for K+ loading into the xylem.	AtNPF7.3,NPF7.3,NRT1.5	3.23455048642754	2.20050498386736e-272
AT1G32490	Encodes a homolog of the yeast PRP2 protein, one of four related DEAH RNA helicases identified as essential cofactors for RNA splicing. Involved in ABI4-regulated ABA signaling under high glucose condition in early seedling growth.	EMB2733,ESP3	0.448050621230545	3.49478033522616e-06
AT1G32530	RING/U-box superfamily protein;(source:Araport11)	NA	0.791999343184582	6.20502378439957e-08
AT1G32640	Encodes a MYC-related transcriptional activator with a typical DNA binding domain of a basic helix-loop-helix leucine zipper motif. Binds to an extended G-Box promoter motif and interacts with Jasmonate ZIM-domain proteins. MYC2 interacts with EIN3 and EIL1 to repress hook curvature and resistance to Botrytis cinera.Its transcription is induced by dehydration stress, ABA treatment and blue light …	ATMYC2,JAI1,JIN1,MYC2,RD22BP1,ZBF1	1.33333891810331	2.48348678145886e-36
AT1G32700	PLATZ transcription factor family protein;(source:Araport11)	NA	0.78583529594638	1.7460223170064e-16
AT1G32750	This gene is predicted to encode a histone acetyltransferase. Five lines with RNAi constructs directed against HAF1 grow normally and can produce root calli, but have defects in agrobacterium-mediated transformation.	GTD1,HAC13,HAF01,HAF1,TAF1	0.323720901623962	0.000380081661242877
AT1G32790	RNA-binding protein, putative, similar to RNA-binding protein GB:CAB40027 GI:4539439 from (Arabidopsis thaliana).Member of a family of PAB2 binding domain proteins.	CID11	0.482386168265155	4.08828509826233e-10
AT1G32928	Avr9/Cf-9 rapidly elicited protein;(source:Araport11)	NA	0.788749401280702	0.017263809258355
AT1G32930	Galactosyltransferase family protein;(source:Araport11)	AtGALT31A,GALT31A	0.912837911049929	0.00208392926432193
AT1G33050	hypothetical protein;(source:Araport11)	NA	1.04468667473066	4.22249631269773e-42
AT1G33055	hypothetical protein;(source:Araport11)	NA	0.57452709095184	0.0302200699689487
AT1G33060	NAC 014;(source:Araport11)	ANAC014,NAC014	0.371230163476752	0.0157637685749745
AT1G33120	Ribosomal protein L6 family;(source:Araport11)	NA	1.09314248036926	1.10480617600223e-34
AT1G33140	Encodes ribosomal protein L9. Identified in a screen for enhancers of as1. as1/pgy double mutants show defects in leaf vascular patterning and adaxial cell fate. Double mutant analysis indicates pgy genes function in the same pathway as REV, KAN1 and KAN2. The mRNA is cell-to-cell mobile.	PGY2	0.57633723107794	3.8577362329838e-12
AT1G33170	S-adenosyl-L-methionine-dependent methyltransferases superfamily protein;(source:Araport11)	NA	0.935639738827889	8.10362548249616e-15
AT1G33290	P-loop containing nucleoside triphosphate hydrolases superfamily protein;(source:Araport11)	NA	0.521125519562497	5.13472729841917e-07
AT1G33360	Encodes ClpX3, a subunit of the Clp protease complex.	NA	0.452954204058279	0.000159913017468754
AT1G33400	Encodes one of the 36 carboxylate clamp (CC)-tetratricopeptide repeat (TPR) proteins (Prasad 2010, Pubmed ID: 20856808) with potential to interact with Hsp90/Hsp70 as co-chaperones.	TPR9	0.482955006734828	0.000439783431828617
AT1G33440	Major facilitator superfamily protein;(source:Araport11)	AtNPF4.4,NPF4.4	1.23601156357929	8.57136937208211e-09
AT1G33475	SNARE-like superfamily protein;(source:Araport11)	NA	1.05113542705249	0.0353422963143406
AT1G33520	Has single homolog in Arabidopsis, also homologs in human, mouse and C. elegans; contains one G-patch domain (known to mediate RNA-protein interactions) and two KOW domains (may bind RNA and/or protein); localized to the nucleus; mutant suppresses high SA levels and constitutive disease resistance in snc1 npr1 background; required for basal resistance against Pseudomonas syringae maculicola ES432…	MOS2	0.459744918643944	0.00288426125173606
AT1G33680	KH domain-containing protein;(source:Araport11)	NA	0.391069704565852	4.19674069176539e-07
AT1G33750	Sesterterpene synthase which produces various sesterpne backbones bia type-A cyclization mechanism.	TPS22	1.02908044458039	1.24882769914711e-06
AT1G33770	Protein kinase superfamily protein;(source:Araport11)	NA	1.94672722476427	0.000802736366192879
AT1G33780	electron transporter, putative (DUF179);(source:Araport11)	NA	0.272522004493858	0.0279951953878919
AT1G33790	jacalin lectin family protein;(source:Araport11)	NA	2.06277452585173	7.33170152880359e-52
AT1G33980	Involved in mRNA surveillance, detects exported mRNAs with truncated open reading frames and initiates nonsense-mediated mRNA decay (NMD). Regulates AT1G72910, AT1G72940, and ADR1-LIKE 2 in a temperature dependent manner.	ATUPF3,UPF3	0.396114364457963	5.64400876673598e-05
AT1G33990	Encodes a protein predicted to act as a carboxylesterase. It has similarity to the SABP2 methyl salicylate esterase from tobacco. This protein does not act on methyl IAA, methyl JA, MeSA, MeGA4, or MEGA9 in vitro.	ATMES14,MES14	0.261149632307218	0.00353807177771586
AT1G34110	Leucine-rich receptor-like protein kinase family protein;(source:Araport11)	RGI5	3.30160376260099	1.42521963690608e-212
AT1G34150	Pseudouridine synthase family protein;(source:Araport11)	NA	0.809426165525672	1.61377397377771e-05
AT1G34190	Encodes a NAC domain transcription factor that regulates the mitochondrial retrograde response and coordinates organellar functions and stress responses.	anac017,NAC017,RAO2	0.235469148935626	0.00300954574530626
AT1G34270	Exostosin family protein;(source:Araport11)	NA	0.486664855343867	0.00731820355479705
AT1G34300	lectin protein kinase family protein;(source:Araport11)	NA	0.444208257359182	3.41074938144011e-07
AT1G34315	transmembrane protein;(source:Araport11)	NA	3.70181743889935	0.0201185934197765
AT1G34320	Ikzf5 (DUF668);(source:Araport11)	PSI1	0.611737630519452	5.16613210190013e-15
AT1G34370	Encodes a putative nuclear Cys(2)His(2)-type zinc finger protein involved in H+ and Al3+ rhizotoxicity. In mutants exposed to aluminum stress, there is no induction of AtALMT1, an malate transporter known to be involved in the mediation of aluminum toxicity. Cell wall of the mutant is unstable in low pH medium (pH 4.5) in low Ca solution. This would mediate Ca-alleviation of low pH stress through…	AtSTOP1,STOP1	1.33583197895829	8.93279700865869e-79
AT1G34460	B1 type cyclin	CYC3,CYCB1	1.36324612960936	8.39292173116729e-08
AT1G34510	Peroxidase superfamily protein;(source:Araport11)	NA	0.722234100362283	0.00349741283355758
AT1G34630	transmembrane protein;(source:Araport11)	NA	1.73310875080391	7.14016166008027e-87
AT1G34750	Protein phosphatase 2C family protein;(source:Araport11)	CIPP1	0.805061689265926	0.00176649407376092
AT1G34760	Encodes a 14-3-3 protein. Binds H+-ATPase in response to blue light.	GF14_OMICRON,GRF11,RHS5	2.17033905524187	2.22021318998163e-29
AT1G35160	GF14 protein phi chain member of 14-3-3 protein family. This protein is reported to interact with the BZR1 transcription factor involved in brassinosteroid signaling and may affect the nucleocytoplasmic shuttling of BZR1 The mRNA is cell-to-cell mobile.	14-3-3PHI,GF14_PHI,GRF4	0.686769997164788	2.721713791867e-18
AT1G35183	zinc finger, C3HC4 type (RING finger) protein;(source:Araport11)	NA	3.77207295247229	0.0148273313282104
AT1G35220	FAM91 carboxy-terminus protein;(source:Araport11)	NA	0.355236780754069	6.26940925907278e-05
AT1G35320	transmembrane protein;(source:Araport11)	NA	0.619949386865411	0.000582592646214709
AT1G35420	alpha/beta-Hydrolases superfamily protein;(source:Araport11)	NA	0.423792948116649	0.000981314884613645
AT1G35470	Encodes a homologue of human RanBPM that belongs to the uncharacterized family of plant SPRY, LisH, CTLH and CRA domain-containing proteins.	RanBPM	0.475347278790354	0.00855846374165827
AT1G35516	myb-like transcription factor family protein;(source:Araport11)	NA	2.00128686954828	1.28863566562766e-37
AT1G35580	CINV1 / A/N-InvG is an alkaline/neutral invertase that breaks sucrose down into fructose and glucose (GH100). The exact localization of CINV1 remains under investigation but there is evidence that fluorescently-tagged CINV1 localizes to the cytoplasm. atinvg mutants have reduced root growth, reduced invertase activity, and increased expression of antioxidant genes under basal conditions. The leve…	A/N-InvG,CINV1	0.41380458841118	2.44296035697061e-07
AT1G35620	Encodes a protein disulfide isomerase-like (PDIL) protein, a member of a multigene family within the thioredoxin (TRX) superfamily. Unlike several other PDI family members, transcript levels for this gene are not up-regulated in response to three different chemical inducers of ER stress (dithiothreitol, beta-mercaptoethanol, and tunicamycin). However, the level of transcripts for this gene is sli…	ATPDI8,ATPDIL5-2,PDI8,PDIL5-2	0.400359491330966	0.000293539542404136
AT1G35710	kinase family with leucine-rich repeat domain-containing protein;(source:Araport11)	NA	1.71460911717634	2.28213458827824e-14
AT1G36050	Endoplasmic reticulum vesicle transporter protein;(source:Araport11)	NA	0.626901866117688	2.11264004655889e-09
AT1G36060	encodes a member of the DREB subfamily A-6 of ERF/AP2 transcription factor family. The protein contains one AP2 domain. There are 8 members in this subfamily including RAP2.4.Overexpression results in increased drought tolerance and vitrified leaves. Binds to DRE/GCC promoter elements and activates expression of aquaporin genes AtTIP1;1, AtTIP2;3, and AtPIP2;2.	TG,WIND3	1.1529305189382	3.52887473250769e-12
AT1G36070	Transducin/WD40 repeat-like superfamily protein;(source:Araport11)	NA	0.611363266996643	1.77487060888654e-06
AT1G36730	Translation initiation factor IF2/IF5;(source:Araport11)	NA	0.560643593822554	4.65359016785132e-17
AT1G36940	myotubularin-like protein;(source:Araport11)	NA	1.1233712827537	0.000519453763130427
AT1G36980	transmembrane 50A-like protein;(source:Araport11)	NA	0.234019688391745	0.0150616411203606
AT1G37150	Although HCS2 is predicted to encode a biotin protein ligase / holocarboxylase synthetase (HCS), hcs2 mutants do not show a decrease in HCS activity. A dual-targeted HCS1 (At2g25710) might account for the HCS activity observed in multiple subcellular compartments in Arabidopsis.	HCS2	1.6853541792049	0.0265657112569251
AT1G42470	Patched family protein;(source:Araport11)	AtNPC1_-_1	0.867947614072742	5.84452625660885e-23
AT1G43020	electron protein, putative (Protein of unknown function, DUF547);(source:Araport11)	NA	0.720131000355568	0.00645560375995811
AT1G43130	like COV 2;(source:Araport11)	LCV2	0.517780396197757	7.95472108691421e-05
AT1G43245	SET domain-containing protein;(source:Araport11)	NA	1.06318468183627	2.03608832838281e-13
AT1G43640	Member of TLP family of tubby like proteins that also contain an F-Box.	AtTLP5,TLP5	4.07092751623279	0.00132673484114523
AT1G43770	PHD finger-containing protein. Interacts with BDT1, acts with other PHD proteins to associate with flowering genes and thereby suppress their transcription.	NA	0.541007295116444	0.0367543570481824
AT1G43790	tracheary element differentiation-related 6;(source:Araport11)	TED6	0.840223519109442	0.000573324274765262
AT1G43800	&	AAD6,FTM1,SAD6	2.28635519651761	2.91299970200086e-06
AT1G44090	Encodes a gibberellin 20-oxidase.	ATGA20OX5,GA20OX5	1.89723556729118	0.0308995930880335
AT1G44125	Natural antisense transcript overlaps with AT1G44120;(source:Araport11)	NA	0.356533399365606	0.00875837557315264
AT1G44160	HSP40/DnaJ peptide-binding protein;(source:Araport11)	NA	1.89437383652767	1.48830465024254e-09
AT1G44170	Encodes an aldehyde dehydrogenase induced by ABA and dehydration that can oxidize saturated aliphatic aldehydes. It is also able to oxidize beta-unsaturated aldehydes, but not aromatic aldehydes. Activity of ALDH3H1 is NAD +-dependent.	ALDH3H1,ALDH4	0.6658555189659	1.40940572412926e-12
AT1G44318	Aldolase superfamily protein;(source:Araport11)	hemb2	1.51630421225553	0.0246708109078814
AT1G44350	encodes a protein similar to IAA amino acid conjugate hydrolase. NO-induced, involved in growth and disease resistance. Plays a positive role in the activation of SAR when challenged with the avirulent pathogen Pst DC3000 (avrB) at 5 ? 106 CFU.	ILL6	0.97519261225249	4.37941865468942e-13
AT1G44750	Member of a family of proteins related to PUP1, a purine transporter. May be involved in the transport of purine and purine derivatives such as cytokinins, across the plasma membrane.	ATPUP11,PUP11	1.12387648857239	2.31421327664252e-32
AT1G44760	Adenine nucleotide alpha hydrolases-like superfamily protein;(source:Araport11)	NA	1.91095943185573	2.31374432957881e-30
AT1G44770	elongation factor;(source:Araport11)	NA	0.77430231590231	7.06012322314002e-11
AT1G44800	Encodes Siliques Are Red 1 (SIAR1). Functions as a bidirectional amino acid transporter that is crucial for the amino acid homeostasis of siliques. Member of nodulin MtN21-like transporter family.	SIAR1,UMAMIT18	1.32177622633904	8.01278952997096e-08
AT1G44830	Encodes a nuclear-localized member of the DREB subfamily A-5 of ERF/AP2 transcription factor family. The protein contains one AP2 domain. There are 15 members in this subfamily including RAP2.1, RAP2.9 and RAP2.10. Overexpression in cultured cells results in an increase in pectin deposition.ERF014 differentially regulates responses to bacterial and fungal pathogens.	AtERF014,ERF014	3.38559147191185	1.82299757967117e-15
AT1G44970	Encodes a class III peroxidase that is genetically redundant with PRX40, expressed in the tapetum, and essential for proper anther and pollen development. Peroxidase required for casparian strip lignification as well as partially required for SGN-dependent compensatory lignification.	PRX9	0.95592936113995	1.90253505520193e-06
AT1G45000	AAA-type ATPase family protein;(source:Araport11)	NA	0.289229939193294	0.000964327681834841
AT1G45130	beta-galactosidase 5;(source:Araport11)	AtBGAL5,BGAL5	0.918837369932927	9.67664575209624e-18
AT1G45145	encodes a cytosolic thioredoxin that reduces disulfide bridges of target proteins by the reversible formation of a disulfide bridge between two neighboring Cys residues present in the active site. Thioredoxins have been found to regulate a variety of biological reactions in prokaryotic and eukaryotic cells.	ATH5,ATTRX5,LIV1,TRX-h5,TRX5	0.52413003239357	0.0122371747461542
AT1G45150	alpha-1,6-mannosyl-glycoprotein 2-beta-N-acetylglucosaminyltransferase;(source:Araport11)	NA	0.404435826706654	0.00373389210514527
AT1G45163	transmembrane protein;(source:Araport11)	NA	2.34847906092123	3.80756969074713e-24
AT1G45249	Leucine zipper transcription factor that binds to the abscisic acid (ABA)?responsive element (ABRE) motif in the promoter region of ABA-inducible genes. Enhances drought tolerance in vegetative tissues. Required for normal glucose response. Localized in the nucleus. Expressed constitutively in roots, leaf vascular tissues, and hydathodes or in all tissues under stress conditions. It's phosphoryla…	ABF2,AREB1,AtABF2,ATAREB1	1.03324445657978	8.20314931826594e-10
AT1G45332	Translation elongation factor EFG/EF2 protein;(source:Araport11)	NA	0.307489011245542	0.00152379926404947
AT1G45976	S-ribonuclease binding protein 1;(source:Araport11)	SBP1	0.822037643472459	1.17373445338759e-06
AT1G46554	other_RNA;(source:Araport11)	NA	1.80798879764024	5.00308066524127e-28
AT1G46768	encodes a member of the DREB subfamily A-5 of ERF/AP2 transcription factor family (RAP2.1). The protein contains one AP2 domain. There are 16 members in this subfamily including RAP2.9 and RAP2.10.	RAP2.1	0.427880934432066	0.0258264100773391
AT1G47056	Encodes an F-box protein. Based on genetic analysis appears to be functionally redundant with VFB2,3, and 4. When expression of all 4 genes is reduced plants show defects in growth and reduced expression of auxin response genes.	VFB1	0.456454603853613	0.000650892237172505
AT1G47250	Encodes 20S proteasome subunit PAF2 (PAF2).	PAF2	0.355404001759846	0.0282965346710683
AT1G47260	Encodes mitochondrial gamma carbonic anhydrase. Component of the NADH dehydrogenase complex.	APFI,GAMMA_CA2	0.422328124178995	7.08095549560897e-05
AT1G47270	Member of TLP family of tubby like proteins that also contain an F-Box. Localized to the plasma membrane.	AtTLP6,TLP6	1.94432927268556	6.64548206164416e-44
AT1G47290	Encodes an enzyme with 3&	3BETAHSD/D1,AT3BETAHSD/D1	0.2838907438954	0.0234398943817566
AT1G47410	hypothetical protein;(source:Araport11)	NA	1.76601467569068	0.00285754677603205
AT1G47420	predicted to encode subunit 5 of mitochondrial complex II and to participate in the respiratory chain	SDH5	0.595052120543443	1.22927124929448e-10
AT1G47600	Encodes a myrosinase. Over-expression led to a glucosinolate profile change.	BGLU34,TGG4	0.904852492610595	0.00493227749898013
AT1G47610	Transducin/WD40 repeat-like superfamily protein;(source:Araport11)	NA	2.12261359371744	0.00113428886537594
AT1G47640	seven transmembrane domain protein;(source:Araport11)	NA	0.253637664718209	0.00657371687193385
AT1G47740	PPPDE putative thiol peptidase family protein;(source:Araport11)	NA	0.86167403496414	2.16101331304808e-23
AT1G47970	nucleolin;(source:Araport11)	NA	0.684804916753407	0.0173380760439613
AT1G48140	Encodes a subunit of the dolichol phosphate mannase synthase (DPMS) complex that may serve as membrane anchors for the catalytic core, DPMS1, or provide catalytic assistance. It is localized in the ER and mediates isoprenyl-linked glycan biogenesis.	DPMS3	0.537123155270853	0.00152703274528768
AT1G48175	Cytidine/deoxycytidylate deaminase family protein;(source:Araport11)	AtTAD2,emb2191,TAD2	0.720507205640427	0.00263107109789473
AT1G48200	hypothetical protein;(source:Araport11)	NA	0.53076478170648	0.038184604189099
AT1G48210	Protein kinase superfamily protein;(source:Araport11)	NA	0.273959233801373	0.00926113936487186
AT1G48260	Encodes a member of the SNF1-related kinase (SnRK) gene family (SnRK3.21), which has also been reported as a member of the CBL-interacting protein kinases (CIPK17).	CIPK17,SnRK3.21	0.808116254564522	5.21183488058444e-06
AT1G48300	Cytosolic iron-sulfur protein with a [2Fe-2S] cluster which synthesizes triacylglycerol (DGAT activity).	DGAT3	1.25042160118291	4.04323588965182e-28
AT1G48310	chromatin remodeling factor18;(source:Araport11)	CHA18,CHR18	0.457131604665852	0.0108362600721807
AT1G48330	SsrA-binding protein;(source:Araport11)	NA	0.713312208446953	0.0424792844487714
AT1G48370	Arabidopsis thaliana metal-nicotianamine transporter YSL4	YSL8	0.819819292943903	4.08117651101365e-08
AT1G48410	Encodes an RNA Slicer that selectively recruits microRNAs and siRNAs. There is currently no evidence that AGO1 Slicer is in a high molecular weight RNA-induced silencing complex (RISC). Mutants are defective in post-transcriptional gene silencing and have pleiotropic developmental and morphological defects. Through its action on the regulation of ARF17 expression, the protein regulates genes invo…	AGO1,AtAGO1,ICU9	0.50059577633463	4.76897386120982e-14
AT1G48430	Dihydroxyacetone kinase;(source:Araport11)	NA	1.20278658890175	3.12643499433094e-31
AT1G48490	Protein kinase which together with IREH1 plays an important role in controlling root skewing and maintaining the microtubule network.	NA	0.374590050520832	3.56948715262316e-07
AT1G48550	VPS26C is a component of a retromer complex, it is involved in endosome to lysosome protein transport and root hair growth.	VPS26C	0.922351403728173	4.71106632493685e-15
AT1G48605	Encodes a protein similar to yeast HAL3, which regulates the cell cycle and tolerance to salt stress through inhibition of the PPZ1 type-1 protein phosphatase. AtHAL3b mRNA levels are induced by salt stress. HAL3B presumably encodes for phosphopantothenoylcysteine decarboxylase being involved in Coenzyme A biosynthesis as indicated by functional complementation of a double mutant hal3 aaBb.	ATHAL3B,HAL3,HAL3B	1.1506078425978	0.0222238539490328
AT1G48840	Plant protein of unknown function (DUF639);(source:TAIR10)	NA	0.497715139922238	6.9127768255068e-06
AT1G48900	Signal recognition particle, SRP54 subunit protein;(source:Araport11)	NA	0.442169501228722	2.74466140182395e-06
AT1G49032	hypothetical protein;(source:Araport11)	NA	1.41876789406727	1.90281750071397e-16
AT1G49050	Encodes a member of the aspartyl protease family. Interacts with BAGP1 and BAG6 and appears to be required for cleavage of BAG6 as BAG6 is not cleaved in APCB1 mutant backgrounds.	APCB1	0.91568576608263	7.45350710440277e-13
AT1G49130	Regulated by heat shock.	BBX17	5.58635120064238	1.79324800648437e-91
AT1G49170	hypothetical protein;(source:Araport11)	NA	0.914832406977874	0.0037716193311308
AT1G49200	RING/U-box superfamily protein;(source:Araport11)	NA	0.466347119129198	0.00479625028095359
AT1G49210	RING/U-box superfamily protein;(source:Araport11)	NA	1.88988436927483	0.000306096994137106
AT1G49240	Member of a subclass of actins composed of ACT2 and ACT8. Its mRNA is strongly expressed in strongly expressed in leaves, roots, stems, flowers, pollen, and siliques. However, protein expression, assayed by a ACT8:GUS fusion reporter, is very low in pollen.	ACT8,FIZ1	0.801853692202245	6.45395724274854e-36
AT1G49300	encodes a small GTPase involved in membrane trafficking. Gene expression is induced by hydrogen peroxide and lines. Lines overexpressing the gene are more tolerant to high salt and hyperosmotic conditions.	ATRAB7,ATRABG3E,RABG3E	0.270845962664899	0.0189449084522853
AT1G49350	PsiMP Glycosylase (PUMY) that hydrolyzes PsiMP to uracil and ribose-5-phosphate. Acts together with PUMY in the peroxisome to prevent toxic pseudouridine monophosphate accumulation. Acts together with the a pseudouridine kinase PUKI in the peroxisome to prevent toxic pseudouridine monophosphate accumulation.	NA	0.626857285523196	0.00116764350694258
AT1G49360	F-box family protein;(source:Araport11)	NA	0.37401661731555	0.00252497313739802
AT1G49480	Encodes a nuclear-localized DNA-binding protein that interacts with ITN1 at the PM and nuclei in vivo and may regulate ITN's subcellular localization.	RTV1	0.276018214087381	0.00569608799911797
AT1G49540	elongator protein 2;(source:Araport11)	AtELP2,ELP2	0.279409872722362	0.0290088827511421
AT1G49570	Peroxidase superfamily protein;(source:Araport11)	NA	2.28812882904377	4.67099376102641e-65
AT1G49600	RNA-binding protein 47A;(source:Araport11)	ATRBP47A,RBP47A	1.89957394423178	1.03691416925005e-139
AT1G49710	Encodes a protein with core &alpha;1,3-fucosyltransferase activity.	ATFUT12,FUCT2,FUCTB,FUT12	0.636004970051441	5.26607574848234e-06
AT1G49720	Identified as a protein that binds to abscisic acid response elements. May mediate transcriptional regulation of ABA responses.	ABF1,AtABF1	1.20276669227056	1.2411144984371e-09
AT1G49730	Protein kinase superfamily protein;(source:Araport11)	NA	0.393226883884001	8.42226167078197e-05
AT1G49760	polyadenylate-binding protein, putative / PABP, putative, similar to poly(A)-binding protein GB:AAF66825 GI:7673359 from (Nicotiana tabacum). Highly and ubiquitously expressed. Member of the class II PABP family.	PAB8,PABP8	0.280360428748895	0.0019841174992055
AT1G49820	encodes 5-methylthioribose kinase, involved in methionine cycle The mRNA is cell-to-cell mobile.	ATMTK,MTK,MTK1	0.319772284388756	0.0049570112387027
AT1G50010	Encodes alpha-2,4 tubulin. TUA2 and TUA4 encode identical proteins. The mRNA is cell-to-cell mobile.	TUA2	0.605996315364694	2.32773838928547e-11
AT1G50040	formin-like protein, putative (DUF1005);(source:Araport11)	NA	1.18149345459219	9.63906450693654e-09
AT1G50140	P-loop containing nucleoside triphosphate hydrolases superfamily protein;(source:Araport11)	NA	0.421910988405208	0.000219527709149578
AT1G50200	Alanyl-tRNA synthetase;(source:Araport11)	ACD,ALATS	0.175020828054844	0.0118388837646562
AT1G50410	Encodes a member of the SNF2 family of helicase-like proteins and is involved in RNA-directed DNA methylation. It is functionally redundant with FRG1.	CHR28,FRG2	0.241159398391578	0.0141063791373593
AT1G50440	RING/FYVE/PHD zinc finger superfamily protein;(source:Araport11)	NA	0.740026541602236	4.99660449628928e-05
AT1G50460	Involved in glucose-ethylene crosstalk.	ATHKL1,HKL1	0.445694579908104	0.005040552556847
AT1G50480	10-formyltetrahydrofolate synthetase (THFS) mRNA, complete The mRNA is cell-to-cell mobile.	THFS	0.899381364737263	1.6076059175104e-46
AT1G50500	encodes a member of VPS53 family protein involved in the retrograde trafficking of vesicles to the late Golgi. Mutants in this gene are more sensitive to heat and osmotic stress.	ATVPS53,HIT1,VPS53	0.296375594648501	0.00364469877336301
AT1G50560	member of CYP705A	CYP705A25	1.03374751404352	2.78793416065622e-11
AT1G50570	Calcium-dependent lipid-binding (CaLB domain) family protein;(source:Araport11)	NA	0.376896182999064	0.000362402407527334
AT1G50575	Putative lysine decarboxylase family protein;(source:Araport11)	NA	0.494469021570999	0.00284054218599834
AT1G50620	RING/FYVE/PHD zinc finger superfamily protein;(source:Araport11)	NA	0.308654450110713	0.0152767173410107
AT1G50640	encodes a member of the ERF (ethylene response factor) subfamily B-1 of ERF/AP2 transcription factor family (ATERF-3). The protein contains one AP2 domain. There are 15 members in this subfamily including ATERF-3, ATERF-4, ATERF-7, and leafy petiole.	ATERF3,ERF3	0.427790384669333	2.16508957751513e-05
AT1G50660	actin cytoskeleton-regulatory complex pan-like protein;(source:Araport11)	NA	0.307267561399929	0.00533229687521175
AT1G50940	Encodes the electron transfer flavoprotein ETF alpha, a putative subunit of the mitochondrial electron transfer flavoprotein complex (ETF beta is At5g43430.1) in Arabidopsis. Mutations of the ETF beta gene results in accelerated senescence and early death compared to wild-type during extended darkness.	ETFALPHA	0.508900919878491	0.00101330052970896
AT1G50970	Membrane trafficking VPS53 family protein;(source:Araport11)	NA	0.567824249515799	0.00307023498006008
AT1G51130	&	NA	1.80159434862701	4.91796874082729e-06
AT1G51170	Encodes an active AGC VIII protein kinase that interacts with the putative transcription factor ATS and regulates planar growth during integument development in the ovule. Mutants exhibit ectopic growth in filaments and petals, as well as aberrant embryogenesis.	AGC2-3,UCN	0.829642842719567	1.93793701750967e-08
AT1G51200	A20/AN1-like zinc finger family protein;(source:Araport11)	NA	0.447857833828629	4.47301515451943e-11
AT1G51260	ACYL-COA:1-ACYLGLYCEROL-3-PHOSPHATE ACYLTRANSFERASE, PUTATIVE SIMILAR TO ACYL-COA:1-ACYLGLYCEROL-3-PHOSPHATE ACYLTRANSFERASE GI:4583544 FROM [BRASSICA NAPUS]	LPAT3	2.23501315123124	0.000594812025251273
AT1G51420	sucrose-phosphatase 1;(source:Araport11)	ATSPP1,SPP1	1.89291175381615	3.17286983709816e-12
AT1G51430	cTAGE family protein;(source:Araport11)	NA	0.963812072771991	5.28763807667232e-05
AT1G51470	Encodes a myrosinase.	BGLU35,TGG5	0.882536516748248	0.00941076568980279
AT1G51550	Kelch repeat-containing F-box family protein;(source:Araport11)	NA	0.644841353845032	0.000354313414477372
AT1G51590	Encodes an alpha-mannosidase I enzyme responsible for N-glycan maturation.	MANIB,MNS1	0.533493346514753	0.00018548231125816
AT1G51645	Natural antisense transcript overlaps with AT1G51640;(source:Araport11)	NA	0.754383066643034	0.000169497987101854
AT1G51690	55 kDa B regulatory subunit of phosphatase 2A mRNA,	ATB_ALPHA,B_ALPHA	0.505496841553602	3.86377734544773e-11
AT1G51720	Amino acid dehydrogenase family protein;(source:Araport11)	NA	0.661197272429798	4.79828116196052e-07
AT1G51730	Ubiquitin-conjugating enzyme family protein;(source:Araport11)	NA	0.72715595899216	4.99919564579191e-08
AT1G51740	member of SYP8 Gene Family	ATSYP81,ATUFE1,SYP81,UFE1	0.813471948590225	2.80223402699019e-05
AT1G51745	Tudor/PWWP/MBT superfamily protein;(source:Araport11)	PWWP2,SL1	0.594082293128082	3.48262991975159e-05
AT1G51760	encodes a member of the six Arabidopsis IAA-amino acid conjugate hydrolase subfamily and conjugates and conjugates IAA-Ala in vitro. Gene is expressed most strongly in roots, stems, and flowers. The mRNA is cell-to-cell mobile.	IAR3,JR3	0.600006177083085	2.60058607734556e-08
AT1G51870	protein kinase family protein;(source:Araport11)	NA	1.31865369039357	0.013269348936407
AT1G51940	Encodes a LysM-containing receptor-like kinase. Induction of chitin-responsive genes by chitin treatment is not blocked in the mutant. Based on protein sequence alignment analysis, it has a typical RD signaling domain in its catalytic loop and possesses autophosphorylation activity.It is required for the suppression of defense responses in absence of pathogen infection or upon abscisic acid treat…	AtLYK3,LYK3	1.23206124774326	2.89138210259084e-29
AT1G51950	indole-3-acetic acid inducible 18;(source:Araport11)	IAA18	0.273662825079159	0.0458544938426493
AT1G52000	Mannose-binding lectin superfamily protein;(source:Araport11)	NA	0.803797223313536	8.94144199501107e-07
AT1G52050	Mannose-binding lectin superfamily protein;(source:Araport11)	NA	2.0305900194317	1.06223172772979e-09
AT1G52060	Mannose-binding lectin superfamily protein;(source:Araport11)	NA	1.58610826315268	1.66958806112094e-10
AT1G52070	Mannose-binding lectin superfamily protein;(source:Araport11)	NA	0.505086909843318	0.00430631095842036
AT1G52150	Member of the class III HD-ZIP protein family. Contains homeodomain and leucine zipper domain. Critical for vascular development and negatively regulates vascular cell differentiation.	ATHB-15,ATHB15,CNA,ICU4	0.392472886514145	3.56908832475347e-06
AT1G52190	Encodes a low affinity nitrate transporter that is expressed in the plasma membrane and found in the phloem of the major veins of leaves. It is responsible for nitrate redistribution to young leaves.	AtNPF1.2,NPF1.2,NRT1.11	3.004373155697	5.31296806462376e-135
AT1G52245	dynein light chain LC6, flagellar outer arm-like protein;(source:Araport11)	NA	1.09935451888715	0.011521726783196
AT1G52280	RAB GTPase homolog G3D;(source:Araport11)	AtRABG3d,RABG3d	0.435249599971742	0.0226687092216451
AT1G52300	Zinc-binding ribosomal protein family protein;(source:Araport11)	NA	0.440052571423934	0.00961694462919001
AT1G52330	Late embryogenesis abundant (LEA) hydroxyproline-rich glycoprotein family;(source:Araport11)	NA	0.610659727267298	0.0287104083179989
AT1G52347	None;(source:Araport11)	NA	0.714355988760233	0.00457460529115621
AT1G52360	Coatomer, beta subunit;(source:Araport11)	NA	0.397279220950733	7.00029523317889e-08
AT1G52380	NUP50 (Nucleoporin 50 kDa) protein;(source:Araport11)	NA	0.626082421952045	5.71972582675791e-07
AT1G52420	UDP-Glycosyltransferase superfamily protein;(source:Araport11)	NA	0.41493288029817	2.73696010739856e-05
AT1G52500	Encodes one of the splice variants of Arabidopsis thaliana MutM homolog. Encodes a formamidopyrimidine-DNA glycosylase that has abasic lyase activity and is able to nick double- stranded oligonucleotides containing 8-oxo-7,8-dihydroguanine (8-oxoG) in vitro.	ATFPG-1,ATFPG-2,ATMMH-1,ATMMH-2,FPG-1,FPG-2,MMH,MMH-1,MMH-2	0.870694268968444	0.000339908339146711
AT1G52540	Protein kinase superfamily protein;(source:Araport11)	NA	1.08021596400796	6.57084648857886e-05
AT1G52580	RHOMBOID-like protein 5;(source:Araport11)	ATRBL5,RBL5	6.1292569843059	1.02393574725453e-05
AT1G52650	F-box/RNI superfamily protein;(source:Araport11)	NA	1.13090442159272	0.0110765792449176
AT1G52690	Late embryogenesis abundant protein (LEA) family protein;(source:Araport11)	LEA7	0.655055892068275	0.0450527946536738
AT1G52710	Rubredoxin-like superfamily protein;(source:Araport11)	NA	1.15617203191828	0.00306792204337783
AT1G52720	hypothetical protein;(source:Araport11)	NA	0.569537104586837	2.63793939850511e-08
AT1G52730	Transducin/WD40 repeat-like superfamily protein;(source:Araport11)	NA	0.337148617475112	0.0108258745238957
AT1G52740	Encodes HTA9, a histone H2A protein. Loss of all H2A.Z (triple mutant with HTA8 and HTA11) results in a reduction in DNA methylation of transposons but not that of genes. Loss of H2A.Z causes misregulation of many genes involved in the response to developmental and environmental cues, and that these genes tend to have high levels of gene-body H2A.Z.	H2A.Z,HTA9	0.375789001651986	5.98746934699856e-06
AT1G52750	alpha/beta-Hydrolases superfamily protein;(source:Araport11)	NA	2.37038054455122	1.45912341728978e-76
AT1G52760	Encodes caffeoyl shikimate esterase and is involved in lignin biosynthesis. CSE converts caffeoyl shikimate to caffiate. Loss of function mutations have reduced lignin content and collapsed vessel elements. It is also reported to function as a lysophospholipase 2 (LysoPL2) involved in tolerance to cadmium-induced oxidative stress. Binds Acyl-CoA-binding protein 2 (ACBP2).	AtMAGL3,CSE,LysoPL2	1.07248426421542	4.93778600406891e-35
AT1G52830	An extragenic dominant suppressor of the hy2 mutant phenotype. Also exhibits aspects of constitutive photomorphogenetic phenotype in the absence of hy2. Mutants have dominant leaf curling phenotype shortened hypocotyls and reduced apical hook. Induced by indole-3-acetic acid.	IAA6,SHY1	5.35231382429448	0.000656815250108737
AT1G52910	fiber (DUF1218);(source:Araport11)	NA	0.939298959104831	0.000105583600542977
AT1G52980	Encodes a GTPase that belongs to the subfamily of YlqF/YawG GTPases. Functions in Pre-60S ribosomal subunit maturation. The mRNA is cell-to-cell mobile.	AtNug2,Nug2	0.771081590221744	1.07435561879828e-14
AT1G53000	Encodes a mitochondrial-localized CMP-KDO (3-deoxy-D-manno-octulosonate) synthetase. This is the enzyme activating KDO as a nucleotide sugar prior to its incorporation into rhamnogalacturonan-II. Heterozygous mutants are defective in pollen development and in pollen tube elongation.	AtCKS,CKS,KDSB	0.288905205806466	0.0303489369804394
AT1G53035	transmembrane protein;(source:Araport11)	NA	1.46099181366831	2.92558185020421e-10
AT1G53050	Protein kinase superfamily protein;(source:Araport11)	NA	0.215461266391054	0.0113039488784566
AT1G53060	Legume lectin family protein;(source:Araport11)	NA	0.676805569768644	0.0215019560878626
AT1G53080	Legume lectin family protein;(source:Araport11)	NA	4.12856597329985	0.00145755729949054
AT1G53165	Protein kinase superfamily protein;(source:Araport11)	ATMAP4K_ALPHA1	0.630029259501744	6.27205454075611e-07
AT1G53170	encodes a member of the ERF (ethylene response factor) subfamily B-1 of ERF/AP2 transcription factor family (ATERF-8). The protein contains one AP2 domain. There are 15 members in this subfamily including ATERF-3, ATERF-4, ATERF-7, and leafy petiole.	ATERF-8,ATERF8,ERF8	1.37857026263709	2.46720152523262e-18
AT1G53180	hypothetical protein;(source:Araport11)	NA	1.3040904885658	2.26605529398076e-12
AT1G53190	Encodes a RING-type E3 ligase that positively regulates CIN-like TCP activity to promote leaf development by mediating the degradation of the TCP repressor TIE1.	TEAR1	0.7666195861267	1.03595086554387e-19
AT1G53250	histone-lysine N-methyltransferase, H3 lysine-79 specific-like protein;(source:Araport11)	NA	1.74661732670864	1.4060842003079e-07
AT1G53280	Encodes a homolog of animal DJ-1 superfamily protein. In the A. thaliana genome, three genes encoding close homologs of human DJ-1 were identified AT3G14990 (DJ1A), AT1G53280 (DJ1B) and AT4G34020 (DJ1C). Among the three homologs, DJ1C is essential for chloroplast development and viability. It exhibits glyoxalase activity towards glyoxal and methylglyoxal.	AtDJ1B,DJ-1b,DJ1B	0.530856383741459	6.39726163649438e-08
AT1G53310	Encodes one of four Arabidopsis phosphoenolpyruvate carboxylase proteins.Plays an important role in carbon and nitrogen metabolism.	ATPEPC1,ATPPC1,PEPC1,PPC1	0.538915883081541	1.03860563351609e-09
AT1G53320	Member of plant TLP family. TLP7 is tethered to the PM but detaches upon stimulus and translocates to the nucleus. Has DNA binding activity but lacks conservation of the transcription activation domain.	AtTLP7,TLP7	1.03857793252848	4.61393195380476e-33
AT1G53345	DHHA1 domain protein;(source:Araport11)	NA	0.635426671059949	0.0286242209735986
AT1G53400	Ubiquitin domain-containing protein;(source:Araport11)	NA	0.803451859886937	4.9597679982737e-06
AT1G53440	Leucine-rich repeat transmembrane protein kinase;(source:Araport11)	NA	0.791191500583684	9.74601374148583e-10
AT1G53450	epstein-barr nuclear antigen;(source:Araport11)	NA	2.65803104035213	3.99605713181098e-113
AT1G53490	Encodes HEI10, a RING finger-containing protein. HEI10 belongs to a group of proteins well conserved among species known as ZMM. Required for class I crossover formation. The mRNA is cell-to-cell mobile.	HEI10	0.857880172542373	0.0362526872561423
AT1G53690	Protein of unknown function that is homologous to At5g41010, which encodes a non-catalytic subunit common to nuclear DNA-dependent RNA polymerases II, IV and V; homologous to budding yeast RPB12.	NA	1.82173339546564	0.00874021968191224
AT1G53700	The WAG1 and its homolog, WAG2 each encodes a protein-serine/threonine kinase that are nearly 70% identical to PsPK3 protein. All three together with CsPK3 belong to PsPK3-type kinases. At the N-terminus, all four possess a serine/threonine-rich domain. They are closely related to Arabidopsis kinases PINOID. wag1/wag2 double mutants exhibit a pronounced wavy root phenotype when grown vertically o…	PK3AT,WAG1	1.95967870634613	4.32306169282093e-27
AT1G53750	26S proteasome AAA-ATPase subunit RPT1a (RPT1a) mRNA,	RPT1A	0.230259563756626	0.00124943040027823
AT1G53780	26S proteasome regulatory complex ATPase;(source:Araport11)	NA	0.886913392287323	4.91145056602939e-27
AT1G53830	encodes a pectin methylesterase	ATPME2,PME2	2.14215324896444	1.44358047116764e-32
AT1G53860	Encodes a protein that is highly methylated in a WT DML background.	NA	1.70278225414584	0.0412189730553567
AT1G53885	linoleate 9S-lipoxygenase-4 protein, putative (DUF581);(source:Araport11). Senescence associated protein, expression regulated by cytokinin.	NA	1.84736696234696	2.91656695738258e-08
AT1G53910	Encodes a member of the ERF (ethylene response factor) subfamily B-2 of ERF/AP2 transcription factor family (RAP2.12). The protein contains one AP2 domain. There are 5 members in this subfamily including RAP2.2 AND RAP2.12. Involved in oxygen sensing. It plays a key role in controlling root bending in response to hypoxia.	ERF74,RAP2.12	0.254582030567497	0.000699474992358445
AT1G54000	GDSL-motif esterase/acyltransferase/lipase. Enzyme group with broad substrate specificity that may catalyze acyltransfer or hydrolase reactions with lipid and non-lipid substrates.	GLL22	0.556747168230228	2.60632254541336e-06
AT1G54090	A member of EXO70 gene family, putative exocyst subunits, conserved in land plants. Arabidopsis thaliana contains 23 putative EXO70 genes, which can be classified into eight clusters on the phylogenetic tree.	ATEXO70D2,EXO70D2	0.296468762722929	0.0219331706961583
AT1G54100	Aldehyde dehydrogenase	ALDH7B4	1.40323120588043	2.75925349151215e-103
AT1G54115	Involved in cation (Na and K) homeostasis.	ATCCX4,CCX4	0.204222957278164	0.0266131875815387
AT1G54120	hypothetical protein;(source:Araport11)	NA	1.54555409706351	2.98311509331924e-05
AT1G54180	Belongs to five-member BRX gene family. Arabidopsis BRX genes share high levels of similarity among each others, with several conserved domains. The most distinct is BRX domain - highly conserved in all BRX genes among distantly related species. This protein-protein interaction domain is required and sufficient for BRX activity.	ATBRXL3,BRX-LIKE3	0.693194991507146	0.00445949692915257
AT1G54310	S-adenosyl-L-methionine-dependent methyltransferases superfamily protein;(source:Araport11)	NA	0.416754500928102	0.00433395870991121
AT1G54320	LEM3 (ligand-effect modulator 3) family protein / CDC50 family protein;(source:Araport11)	NA	0.232538107741526	0.00663811177771149
AT1G54410	Encodes a KS-type dehydrin can reduce the formation of reactive oxygen species (ROS) from Cu.	AtHIRD11,HIRD11	0.590062397587777	0.017786491464573
AT1G54510	Encodes AtNEK1, a member of the NIMA-related serine/threonine kinases (Neks) that have been linked to cell-cycle regulation in fungi and mammals. Plant Neks might be involved in plant development processes.	ATNEK1,NEK1	0.595246465196899	3.15510161718392e-06
AT1G54860	Glycoprotein membrane precursor GPI-anchored;(source:Araport11)	NA	3.96447894505212	0.000152087355512953
AT1G54920	hypothetical protein;(source:Araport11)	NA	0.810372074422027	3.79451027565643e-24
AT1G55090	carbon-nitrogen hydrolase family protein;(source:Araport11)	NA	0.298765986283009	0.00125597374513804
AT1G55110	indeterminate(ID)-domain 7;(source:Araport11)	AtIDD7,IDD7,REDSTART	1.22041201220108	1.52768806072784e-13
AT1G55120	Encodes a protein with fructan exohydrolase (FEH) activity acting on levan-type fructans (6-FEH, levanase). The enzyme does not have invertase activity.	AtcwINV3,ATFRUCT5,FRUCT5	2.0034723089975	1.3280669460212e-10
AT1G55310	Encodes a SR spliceosome protein that is localized to nuclear specks, interacts with SR45 and the U1-70K protein of the U1 snRNP, has sequence similar to human SC35 protein. Barta et al (2010) have proposed a nomenclature for Serine/Arginine-Rich Protein Splicing Factors (SR proteins): Plant Cell. 2010, 22:2926.	At-SCL33,ATSCL33,SCL33,SR33	0.767608644899296	7.22439717210195e-15
AT1G55360	tRNA-splicing ligase (DUF239);(source:Araport11)	NA	0.430991446900522	5.83421315961761e-05
AT1G55510	branched-chain alpha-keto acid decarboxylase E1 beta	BCDH_BETA1	0.379021320494004	0.00320964971173838
AT1G55530	RING/U-box superfamily protein;(source:Araport11)	NA	0.811429555518003	7.36683365585307e-19
AT1G55590	RNI-like superfamily protein;(source:Araport11)	NA	0.242390653398997	0.0354006851865619
AT1G55610	mutant has Altered vascular cell differentiation; LRR Receptor Kinase	BRL1	0.302111118352426	0.00992102035976874
AT1G55620	Encodes a chloride channel protein that has been localized to the chloroplast and golgi apparatus. Complements yeast gef1 mutant and therefor may function to acidify the golgi lumen.	ATCLC-F,CLC-F,CLCF	0.639735513448181	3.56189554163967e-08
AT1G55680	Transducin/WD40 repeat-like superfamily protein;(source:Araport11)	NA	0.37127375315018	3.45863761262548e-05
AT1G55690	Sec14p-like phosphatidylinositol transfer family protein;(source:Araport11)	NA	0.872513294241734	1.41093358489597e-19
AT1G55760	Expression induced under NaCl, mannitol, ABA and indole-3-acetic acid (IAA) treatment.	NA	0.370628959834227	0.0101132025610276
AT1G55810	One of the homologous genes predicted to encode proteins with UPRT domains (Uracil phosphoribosyltransferase). Five of these genes (At5g40870, At3g27190, At1g55810, At4g26510 and At3g27440) show a high level of identity, and are annotated as also containing a N-terminal uracil kinase (UK) domain. These genes are referred to as UKL1 (UK-like 1), UKL2, UKL3, UKL4 and UKL5, respectively.	UKL3	0.829929961856548	2.50230806653631e-12
AT1G55840	Sec14p-like phosphatidylinositol transfer family protein;(source:Araport11)	NA	0.557901647684636	1.97109939170744e-11
AT1G55850	encodes a protein similar to cellulose synthase The mRNA is cell-to-cell mobile.	ATCSLE1,CSLE1	0.250785162547889	0.00783196646691698
AT1G55880	Pyridoxal-5-phosphate-dependent enzyme family protein;(source:Araport11)	NA	0.413000055411075	0.00371169968978293
AT1G56090	Tetratricopeptide repeat (TPR)-like superfamily protein;(source:Araport11)	NA	1.34823981274088	1.44245306275414e-07
AT1G56140	Leucine-rich repeat transmembrane protein kinase;(source:Araport11)	NA	0.347365943747221	0.000291813993753852
AT1G56145	Leucine-rich repeat transmembrane protein kinase;(source:Araport11)	NA	0.642536560605174	1.12594527106617e-08
AT1G56150	SAUR-like auxin-responsive protein family;(source:Araport11)	SAUR71	1.78358652041119	0.00605764376981308
AT1G56180	VIR3 encodes a putative chloroplast metalloprotease that is localized to the thylakoid membrane. The vir3-1 mutant came out of a genetic suppressor screen of the Arabidopsis variegation mutant yellow variegated (var2). The suppressor displayed an additional virescent phenotype, i.e. the bases of young leaves were yellow, and leaf color gradually turned to green toward the leaf tips.	VIR3,VIR3	0.620140348654653	7.29534460382398e-07
AT1G56200	Encodes a chloroplast localized protein that is essential for chloroplast development.	EMB1303	0.744204286283445	4.63124252604789e-11
AT1G56210	Heavy metal transport/detoxification superfamily protein;(source:Araport11)	NA	0.565502414042666	0.00613906482780295
AT1G56220	Dormancy/auxin associated family protein;(source:Araport11)	NA	2.31536619920548	8.85831259198541e-152
AT1G56230	enolase (DUF1399);(source:Araport11)	NA	0.481331631872392	0.000423116396413218
AT1G56290	CwfJ-like family protein;(source:Araport11)	NA	0.636919773776802	0.00032965885694326
AT1G56310	DEDDy-type 3&	ATRM2	0.645686623348667	0.00150258774781429
AT1G56423	hypothetical protein;(source:Araport11)	NA	0.777735255875816	0.0066454477723224
AT1G56460	HIT zinc finger and PAPA-1-like domain-containing protein;(source:Araport11)	NA	0.630206022880907	0.000574482679364556
AT1G56540	Disease resistance protein (TIR-NBS-LRR class) family;(source:Araport11)	NA	0.508546999103786	0.0201533364448461
AT1G56580	Encodes SMALLER WITH VARIABLE BRANCHES (SVB), a protein with a conserved domain of unknown function (DUF538). The trichomes of the SVB mutants are smaller and exhibit branches of variable length and number. ABA responsive trichome formation regulator.	SVB	0.575895250755473	2.62415894821525e-05
AT1G56590	Involved in vesicle trafficking between the trans -Golgi network and vacuoles.	AP3M,ZIP4	0.356927268526668	0.000859952009244076
AT1G56612	Natural antisense transcript overlaps with AT1G56610;(source:Araport11)	NA	0.570170955892253	0.000325305809648461
AT1G56650	Encodes a putative MYB domain containing transcription factor involved in anthocyanin metabolism and radical scavenging. Essential for the sucrose-mediated expression of the dihydroflavonol reductase gene. Auxin and ethylene responsiveness of PAP1 transcription is lost in myb12 mutants. Interacts with JAZ proteins to regulate anthocyanin accumulation.	ATMYB75,AtPAP1,MYB75,PAP1,SIAA1	0.818124620604698	0.0218948540035264
AT1G56680	Chitinase family protein;(source:Araport11)	NA	0.897473824732369	0.040581661861823
AT1G56700	Peptidase C15, pyroglutamyl peptidase I-like protein;(source:Araport11)	NA	0.568338106274707	1.32417186808089e-12
AT1G56720	Protein kinase superfamily protein;(source:Araport11)	NA	0.81489957494393	5.15085226977294e-09
AT1G57570	Mannose-binding lectin superfamily protein;(source:Araport11)	NA	1.59270164986721	0.00359008014820022
AT1G57620	emp24/gp25L/p24 family/GOLD family protein;(source:Araport11)	CYB	0.439998332335617	0.0191435802212334
AT1G57660	Translation protein SH3-like family protein;(source:Araport11)	NA	0.466183629678986	1.27700385174869e-06
AT1G57720	Translation elongation factor EF1B, gamma chain;(source:Araport11)	NA	0.395953008236165	2.26573186852214e-07
AT1G57990	Member of a family of proteins related to PUP1, a purine transporter. May be involved in the transport of purine and purine derivatives such as cytokinins, across the plasma membrane.	ATPUP18,PUP18	1.0048363168985	1.55799355712825e-13
AT1G58030	Encodes a member of the cationic amino acid transporter (CAT) subfamily of amino acid polyamine choline transporters. Localized to the tonoplast.	AtCAT2,CAT2	1.08049076172628	7.32772231362906e-40
AT1G58070	WALLIN is an actin binding protein involved in ROP11 mediated xylem pit patterning.	WAL	0.815353542167242	0.00143658678422844
AT1G58100	Encodes TCP8, belongs to the TCP transcription factor family known to bind site II elements in promoter regions. Modulates GA-dependent stamen filament elongation by direct activation of SAUR63 subfamily genes through conserved target sites in their promoters.	AtTCP8,TCP8	0.342900016777572	0.00073588525716203
AT1G58110	Basic-leucine zipper (bZIP) transcription factor family protein;(source:Araport11)	NA	0.244168023815189	0.0123991454407505
AT1G58180	beta carbonic anhydrase 6;(source:Araport11)	ATBCA6,BCA6	0.917575929503571	2.60271297982059e-06
AT1G58200	A member of MscS-like gene family, structurally very similar to MSL2, comprising of an N-terminal chloroplast transit peptide, five trans-membrane helices and a C-terminal cytoplasmic domain. Mutant plants showed abnormalities in the size and shape of plastids. MSL3-GFP was localized to discrete foci on the plastid envelope and co-localize with the plastid division protein AtMinE. MSL3 was capabl…	MSL3	0.269583690684127	0.0072320326502337
AT1G58235	hypothetical protein;(source:Araport11)	NA	0.881598601868871	8.58632528992148e-14
AT1G58250	SABRE, putative gene of unknown function, homologous to maize apt1 gene. Required for normal cell expansion in the root cortex. The sabre mutation results in abnormal cell expansion. Encodes a rare message; very low level of expression was detected in roots and shoots.	HPS4,SAB	0.1642014055763	0.0409666216468922
AT1G58350	Putative serine esterase family protein;(source:Araport11)	ZW18	0.582218690870552	1.24448786267504e-08
AT1G58400	Disease resistance protein (CC-NBS-LRR class) family;(source:Araport11)	NA	1.93523576380683	2.08911599695913e-23
AT1G58410	Disease resistance protein (CC-NBS-LRR class) family;(source:Araport11)	NA	1.92539976892728	2.44886813799119e-11
AT1G58602	LRR and NB-ARC domains-containing disease resistance protein;(source:Araport11)	RPP7	0.640572422182693	4.7805115029588e-08
AT1G59520	Encodes CW7.	CW7	0.602966148559018	3.90551340381552e-06
AT1G59580	encodes a mitogen-activated kinase involved in innate immunity The mRNA is cell-to-cell mobile.	ATMPK2,MPK2	0.495755244064349	9.2423469634945e-07
AT1G59610	A high molecular weight GTPase whose GTP-binding domain shows a low homology to those of other plant dynamin-like proteins.Contains a pleckstrin homologous domain. DRP2B and DRP1A participate together in clathrin-coated vesicle formation during endocytosis. The mRNA is cell-to-cell mobile.	ADL3,CF1,DL3,DRP2B	0.451004105037267	4.31240172296371e-11
AT1G59650	Encodes CW14.	CW14	0.506938869478285	2.39459366072783e-05
AT1G59750	Encodes a member of the auxin response factor family. ARFs bind to the cis element 5'-TGTCTC-3' ARFs mediate changes in gene expression in response to auxin. ARF's form heterodimers with IAA/AUX genes. ARF1 enhances mutant phenotypes of ARF2 and may act with ARF2 to control aspects of maturation and senescence.ARF1:LUC and 3xHA:ARF1 proteins have a half-life of ~3-4 hours and their degradation is…	ARF1	0.202768770683228	0.0307631782159033
AT1G59780	NB-ARC domain-containing disease resistance protein;(source:Araport11)	NA	1.2132572874048	0.00100057035837088
AT1G59820	Encodes a phospholipid translocase. Involved in secretory vesicle formation from trans-Golgi in peripheral columella cells at the root tip. Mutants have short primary roots and grow slower. The mRNA is cell-to-cell mobile.	ALA3	0.276776465824322	0.00406516678170162
AT1G59830	Encodes one of the isoforms of the catalytic subunit of protein phosphatase 2A: AT1G59830/PP2A-1, AT1G10430/PP2A-2, At2g42500/PP2A-3, At3g58500/PP2A-4 [Plant Molecular Biology (1993) 21:475-485 and (1994) 26:523-528; Note that in more recent publications, there is mixed use of gene names for PP2A-3 and PP2A-4 - some refer to At2g42500 as PP2A-3 and some as PP2A-4].	PP2A-1	0.471093659580851	1.4931600709434e-06
AT1G59870	ATP binding cassette transporter. Localized to the plasma membrane in uninfected cells. In infected leaves, the protein concentrated at infection sites. Contributes to nonhost resistance to inappropriate pathogens that enter by direct penetration in a salicylic acid?dependent manner. Required for mlo resistance. Has Cd transporter activity (Cd2+ extrusion pump) and contributes to heavy metal resi…	ABCG36,ATABCG36,ATPDR8,PDR8,PEN3	0.509974720705213	6.0139770872278e-10
AT1G59900	encodes the e1 alpha subunit of the pyruvate dehydrogenase complex (PDC) The mRNA is cell-to-cell mobile.	AT-E1_ALPHA,E1_ALPHA,IAR4L	0.749251848301885	1.066810857784e-27
AT1G59940	Type A response regulator highly similar to bacterial two-component response regulators. Rapidly induced by cytokinin. Involved in red-light signaling. Acts redundantly with ARR3 in the control of circadian period in a cytokinin-independent manner.	ARR3	1.48112755660818	7.66248725890258e-06
AT1G59960	NAD(P)-linked oxidoreductase superfamily protein;(source:Araport11)	NA	1.23161837994249	3.73526988273334e-08
AT1G59980	ARG1-like 2;(source:Araport11)	ARL2,ATDJC39,GPS4	0.911518676479839	6.38650301554122e-05
AT1G60010	PADRE protein down-regulated after infection by S. sclerotiorun.	NA	1.57142308328509	3.57784383875451e-38
AT1G60060	Serine/threonine-protein kinase WNK (With No Lysine)-like protein;(source:Araport11)	NA	3.57215132820785	1.23762777593574e-53
AT1G60140	Encodes an enzyme putatively involved in trehalose biosynthesis. The protein has a trehalose synthase (TPS)-like domain that may or may not be active as well as a trehalose phosphatase (TPP)-like domain.	ATTPS10,TPS10,TPS10	0.95270681118516	2.94787742409232e-45
AT1G60160	Member of the KT/KUP/HAK family of proton-coupled potassium transporters which have potential effect on cellular expansion.	KT12	1.26922741917594	2.07372606066503e-35
AT1G60170	Encodes a splicing factor PRP31. Involved in transcriptional gene silencing and stress responses.	emb1220,PRP31	0.92196354162406	5.34813137031571e-14
AT1G60200	RBM25 is an alternative splicing factor involved in mediation of abiotic stress response and ABA response. Its expression is modulated by a variety of stressors and it in turn appears to affect the ratio of splice variants of stress responsive genes such as HAB1.2/HAB1.1.	RBM25	0.896172994392204	9.28801797247586e-26
AT1G60220	Encodes a deSUMOylating enzyme. In vitro it has both peptidase activity and isopeptidase activity: it can cleave C-terminal residues from SUMO to activate it for attachment to a target protein and it can also act on the isopeptide bond between SUMO and another protein. sGFP:OTS1 protein accumulates in the nucleus. Double mutant analysis with ULP1C/OTS2 indicates that these genes are involved in s…	OTS1,ULP1D	0.428368031745956	0.00160061079371695
AT1G60420	Reduce transmission through pollen. The mRNA is cell-to-cell mobile.	AtNRX1,NRX1	0.735121035350345	1.36542526037897e-13
AT1G60430	actin-related protein C3;(source:Araport11)	ARPC3	0.519025154536592	0.000970831362083347
AT1G60440	The gene AT1G60440 encodes pantothenate kinase 1. Its molecular function was shown to phosphorylate pantothenate to form 4?-phosphopantothenate.	ATCOAA,ATPANK1,PANK1	0.920844145452977	2.21245624833178e-11
AT1G60450	Predicted to encode a galactinol synthase.	AtGolS7,GolS7	7.19076267228298	5.42259884335534e-08
AT1G60610	SBP (S-ribonuclease binding protein) family protein;(source:Araport11)	NA	1.48673252738684	2.90068250761467e-11
AT1G60710	Encodes ATB2.	ATB2	0.22240099818866	0.00543376680011666
AT1G60730	NAD(P)-linked oxidoreductase superfamily protein;(source:Araport11)	NA	0.75111949294587	2.20662133271329e-06
AT1G60740	Thioredoxin superfamily protein;(source:Araport11)	NA	1.885928029791	4.40142884328494e-08
AT1G60750	NAD(P)-linked oxidoreductase superfamily protein;(source:Araport11)	NA	2.13616086560094	0.00428352351592837
AT1G60780	?1 adaptin component of heterotetrameric protein complex that regulates protein sorting at the trans-Golgi network/early endosome. The observed pleiotropic cellular and developmental defects in mutants are primarily due to defects in sorting of targets such as KNOLLE.	AP1M2,HAP13	0.395884450114785	9.75240081821292e-06
AT1G60787	cysteine/histidine-rich C1 domain protein;(source:Araport11)	NA	2.06998784835806	0.00165772691863718
AT1G60810	One of the three genes encoding subunit A of the trimeric enzyme ATP Citrate lyase	ACLA-2,ACLA2	1.09860355941057	4.16485797277389e-17
AT1G60870	maternal effect embryo arrest 9;(source:Araport11)	MEE9	0.624475259506753	0.000612892578395309
AT1G60900	Putative U2A65 splicing factor which functions in abscisic acid mediated flowering via regulating the precursor messenger RNA splicing of ABI5 and FLC in shoot apex. Regulates flowering time and displays a redundant role in pollen tube growth together with AtU2AF65a.	ATU2AF65B,U2AF65b	0.928346374160419	1.27425604220589e-16
AT1G60940	encodes a member of SNF1-related protein kinases (SnRK2) whose activity is activated by ionic (salt) and non-ionic (mannitol) osmotic stress.	SNRK2-10,SNRK2.10,SRK2B	0.206169421477931	0.0249120420064375
AT1G61030	Encodes one of two redundant proteins (the other is WAPL1) that are involved in prophase removal of cohesion during meiosis. Double mutants with wapl1 exhibit reduced fertility due to defects in meiosis and also some abnormal embryo development in rare cases where embryos are formed.	AtWAPL2,WAPL2	0.608571549900817	3.68120690120603e-07
AT1G61040	Encodes a yeast Paf1C subunit homolog required for the expression of the MADS box gene FLC and other members of the FLC/MAF MADS-box gene family. Member of PAF-C complex.	VIP5	0.399553847623681	0.000709145392116819
AT1G61065	1,3-beta-glucan synthase component (DUF1218);(source:Araport11)	NA	0.593126850983565	0.0376969122611221
AT1G61100	disease resistance protein (TIR class);(source:Araport11)	NA	0.477919820567598	2.56553522457816e-08
AT1G61170	hypothetical protein;(source:Araport11)	NA	2.10535577438213	4.37240168327622e-16
AT1G61180	Coiled-coil nucleotide-binding leucine-rich-repeat protein involved in disease resistance.	UNI	0.994740439752239	2.45739975600552e-21
AT1G61240	lysine ketoglutarate reductase trans-splicing-like protein (DUF707);(source:Araport11)	NA	0.596435090695698	0.00277285591208331
AT1G61250	Encodes a putative secretory carrier membrane protein (SC3). The mRNA is cell-to-cell mobile.	AtSCAMP1,SC3,SCAMP1	0.687239994234458	8.87226757793396e-13
AT1G61255	hypothetical protein;(source:Araport11)	NA	2.27810544419624	1.52152182393626e-07
AT1G61260	cotton fiber (DUF761);(source:Araport11)	NA	1.86531344010313	6.50312094317464e-11
AT1G61330	FBD, F-box and Leucine Rich Repeat domains containing protein;(source:Araport11)	NA	1.93211046981824	0.0191772565523926
AT1G61360	S-locus lectin protein kinase family protein;(source:Araport11)	NA	0.965962224841739	1.21250301966901e-09
AT1G61390	S-locus lectin protein kinase family protein;(source:Araport11)	NA	0.918197890293972	0.00587725271965164
AT1G61590	Protein kinase superfamily protein;(source:Araport11)	NA	0.261406794290967	0.00468754844922227
AT1G61620	Encodes a RING-finger E3 ubiquitin ligase that plays a major role in maintaining COP1 homeostasis by targeting COP1 for ubiquitination and degradation in dark-grown seedlings. The mRNA is cell-to-cell mobile.	CSU1	0.724291014357939	2.81123376221464e-10
AT1G61667	serine protease, putative (Protein of unknown function, DUF538);(source:Araport11)	NA	1.01443058582936	1.99140952952771e-05
AT1G61690	phosphoinositide binding protein;(source:Araport11)	NA	1.05832525653473	4.42209741322759e-21
AT1G61750	Receptor-like protein kinase-related family protein;(source:Araport11)	NA	1.3238365292172	1.033444363002e-06
AT1G61840	Cysteine/Histidine-rich C1 domain family protein;(source:Araport11)	NA	1.73197362247306	2.14888132535774e-10
AT1G61850	Encodes a non-specific lipase that hydrolyzes phospholipids as well as galactolipids, at both sn-1 and sn-2 positions. Involved in basal jasmonic acid biosynthesis by releasing the precursor fatty acid from membrane lipids. Mutant plants were impacted in resistance to fungus B. cinerea.	NA	0.5952948912998	1.2973536052401e-10
AT1G61900	hypothetical protein;(source:Araport11)	NA	0.444274077230428	3.04339967575606e-06
AT1G61970	Mitochondrial transcription termination factor family protein;(source:Araport11)	NA	0.793616388985814	4.61030903123667e-07
AT1G62020	Member of the Coat Protein I (COPI) complex is a seven-subunit coatomer complex consisting of the &	NA	0.494008580056153	3.59624563495789e-14
AT1G62040	Autophagy protein.	ATG8C	0.554643820753876	0.00279395255355886
AT1G62280	Encodes a protein with ten predicted transmembrane helices. The SLAH1 protein has similarity to the SLAC1 protein involved in ion homeostasis in guard cells. Although it is not expressed in guard cells, it can complement a slac1-2 mutant suggesting that it performs a similar function. SLAH1:GFP localizes to the plasma membrane.	SLAH1	2.96005612772176	5.33963276928545e-11
AT1G62290	Saposin-like aspartyl protease family protein;(source:Araport11)	AtPaspA2,PaspA2	1.40671076568241	7.68572844466322e-33
AT1G62310	Encodes a probable H3K9me2 demethylase. Functions in trichome morphogenesis via regulation of GL3.	NA	0.83272001458131	2.57876280987943e-13
AT1G62330	O-fucosyltransferase family protein;(source:Araport11)	NA	0.373730081556625	0.00367681761708431
AT1G62360	Class I knotted-like homeodomain protein that is required for shoot apical meristem (SAM) formation during embryogenesis and for SAM function throughout the lifetime of the plant. Functions by preventing incorporation of cells in the meristem center into differentiating organ primordia. It has also been shown to have a role in the specification of flower meristem identity.	BUM,BUM1,SHL,STM,WAM,WAM1	0.730853025905745	0.00429085903846804
AT1G62380	Encodes a protein similar to 1-aminocyclopropane-1-carboxylic oxidase (ACC oxidase). Expression of the AtACO2 transcripts is affected by ethylene.	ACO2,ATACO2	0.671771571210397	8.24251711495647e-14
AT1G62440	encodes a paralog of LRX1 (LEUCINE-RICH REPEAT/EXTENSIN 1) which acts synergistically with LRX1 in root hair cell morphogenesis.	LRX2	1.71678297314809	8.15580144307853e-59
AT1G62480	Vacuolar calcium-binding protein-like protein;(source:Araport11)	NA	2.57729094431746	5.18952604237461e-92
AT1G62610	NAD(P)-binding Rossmann-fold superfamily protein;(source:Araport11)	NA	2.22660384159039	7.12476279917123e-67
AT1G62740	Encodes one of the 36 carboxylate clamp (CC)-tetratricopeptide repeat (TPR) proteins (Prasad 2010, Pubmed ID: 20856808) with potential to interact with Hsp90/Hsp70 as co-chaperones. The mRNA is cell-to-cell mobile.	Hop2	0.390039698699598	0.00191291215049319
AT1G62760	Pectin methylesterase inhibitor that controls PME activity and pectin methylesterification during Botrytis infection.	AtPMEI10	2.72819252299305	7.8079316800078e-32
AT1G62770	PMEI9 pectin methyleseterase inhibitor. Expressed in many plant tissues.	PMEI9	3.66389827691636	6.56227297232038e-75
AT1G62800	Encodes aspartate aminotransferase (Asp4).	ASP4	0.606059849075688	0.000617239926819818
AT1G62810	Encodes COPPER AMINE OXIDASE1 (CuAO1). Contributes to abscisic acid- and polyamine-induced nitric oxide biosynthesis and abscisic acid signal transduction.	CuAO1	0.700899807252473	6.82877849712991e-12
AT1G62820	Calcium-binding EF-hand family protein;(source:Araport11)	CML14	0.591950144037199	0.00116949353388154
AT1G62914	pentatricopeptide (PPR) repeat-containing protein;(source:Araport11)	NA	0.55132944908959	0.00799226848709578
AT1G63020	Encodes one of two alternative largest subunits of a putative plant-specific RNA polymerase IV (aka RNA polymerase D). Required for posttranscriptional gene silencing.	NRPD1,NRPD1A,POL_IVA,SDE4,SMD2	0.41102402071005	0.0284501358523695
AT1G63140	O-methyltransferase family protein;(source:Araport11)	NA	5.45246294894401	3.55629949098486e-17
AT1G63180	Encodes a protein with UDP-D-glucose 4-epimerase activity. Involved in pollen development.	UGE3	1.13034709126762	9.87066364382713e-13
AT1G63220	Calcium-dependent lipid-binding (CaLB domain) family protein;(source:Araport11)	NA	2.39119220987153	0.000183433419535289
AT1G63290	Aldolase-type TIM barrel family protein;(source:Araport11)	NA	0.964895796055806	3.88999147549286e-11
AT1G63300	Myosin heavy chain-related protein;(source:Araport11)	NA	1.24218779316018	6.98876355520378e-08
AT1G63310	hypothetical protein;(source:Araport11)	NA	0.594235089259693	0.00526082591823811
AT1G63380	NAD(P)-binding Rossmann-fold superfamily protein;(source:Araport11)	NA	3.0211470483499	3.40280846504429e-05
AT1G63400	Pentatricopeptide repeat (PPR) superfamily protein;(source:Araport11)	NA	1.05206398774572	0.0100219213635714
AT1G63430	Leucine-rich repeat protein kinase family protein;(source:Araport11)	NA	0.458894481643156	5.00646035219991e-07
AT1G63440	The Arabidopsis P-type ATPase HMA5 is involved in Cu detoxification. hma5 mutant plants exhibit Cu hypersensitivity, which is especially dramatic in roots where HMA5 is mostly expressed.	HMA5	0.489214858186042	0.000382471310789314
AT1G63490	Histone demethylase belonging to the KDM5/JARID1 family which plays crucial roles in response to dehydration stress and abscisic acid (ABA). Directly binds the chromatin of OPEN STOMATA 1 (OST1) and demethylated H3K4me3 for the regulation of OST1 mRNA abundance, thereby modulating the dehydration stress response.	JMJ17	0.499030386764062	1.03059526099933e-06
AT1G63500	kinase with tetratricopeptide repeat domain-containing protein;(source:Araport11)	BSK7	0.351126946560396	3.55993731006682e-05
AT1G63640	P-loop nucleoside triphosphate hydrolases superfamily protein with CH (Calponin Homology) domain-containing protein;(source:Araport11)	NA	0.595640603388233	2.3979638921017e-06
AT1G63690	SIGNAL PEPTIDE PEPTIDASE-LIKE 2;(source:Araport11)	ATSPPL2,SPPL2	0.77298842990504	2.07489398494063e-21
AT1G63730	Disease resistance protein (TIR-NBS-LRR class) family;(source:Araport11)	NA	0.361051580629154	0.0166587571331068
AT1G63740	Disease resistance protein (TIR-NBS-LRR class) family;(source:Araport11)	NA	0.856290919857927	1.00610834054603e-12
AT1G63800	ubiquitin-conjugating enzyme 5;(source:Araport11)	UBC5	0.492514819444329	0.000132147208129926
AT1G63860	Disease resistance protein (TIR-NBS-LRR class) family;(source:Araport11)	NA	0.757020364895967	0.00195478041066724
AT1G63940	monodehydroascorbate reductase 6;(source:Araport11)	MDAR6	0.853170985542909	1.70590505612739e-24
AT1G63980	D111/G-patch domain-containing protein;(source:Araport11)	NA	0.809225842647665	4.25093317099544e-08
AT1G64040	Encodes the catalytic subunit of a Type 1 phosphoprotein Ser/Thr phosphatase, expressed in roots, shoots and flowers.	TOPP3	0.716730898114263	7.73837176804633e-19
AT1G64110	Target promoter of the male germline-specific transcription factor DUO1.	DAA1	2.92213817629257	4.555210638317e-102
AT1G64140	WRKY transcription factor;(source:Araport11)	NA	0.501318015565838	1.31079368473e-10
AT1G64190	6-phosphogluconate dehydrogenase family protein;(source:Araport11)	PGD1	0.331046290647463	4.39701060212856e-05
AT1G64230	ubiquitin-conjugating enzyme 28;(source:Araport11)	UBC28	0.242517975117929	0.00133075714499745
AT1G64330	myosin heavy chain-like protein;(source:Araport11)	NA	1.16201037482915	1.97506196146228e-06
AT1G64350	seh1-like protein	SEH1H	0.324767628533978	0.0344530133393636
AT1G64440	Encodes a protein with UDP-D-glucose 4-epimerase activity. Mutants in RHD1 have abnormally shaped root hairs with a bulbous region at the base. Allelic to REB1 encoding a UDP-D-glucose 4-epimerase involved in cell wall biosynthesis.Involved in growth and cell wall carbohydrate biosynthesis.	REB1,RHD1,UGE4	0.657010786519183	4.7890648235547e-08
AT1G64460	Phosphatidylinositol 4-kinase involved in root elongation and hypersensitive response.Affects stability of MIEL1 which in turn affects MYB30 turnover.	NA	1.45132262677384	4.19154074086486e-27
AT1G64550	Encodes a member of GCN subfamily. Predicted to be involved in stress-associated protein translation control. The mutant is affected in MAMP ((microbe-associated molecular patterns)-induced stomatal closure, but not other MAMP-induced responses in the leaves. Arabidopsis has five ABCF proteins, which are all closely related by sequence to yeast GCN20. None of these five are individually required …	ABCF3,AtABCF3,AtGCN20,ATGCN3,GCN20,GCN3,SCORD5	0.251940793508517	0.00114441779249288
AT1G64610	Transducin/WD40 repeat-like superfamily protein;(source:Araport11)	NA	0.323235193974584	0.036101524595259
AT1G64640	early nodulin-like protein 8;(source:Araport11)	AtENODL8,ENODL8	1.55299819159392	8.86885806701026e-21
AT1G64660	Encodes a functional methionine gamma-lyase, a cytosolic enzyme catalyzes the degradation of methionine into methanethiol, alpha-ketobutyrate and ammonia. The catabolism of excess methionine is important to methionine homeostasis. The mRNA is cell-to-cell mobile.	ATMGL,MGL	2.37754800869042	4.62773254665257e-134
AT1G64670	Encodes a epidermally expressed extracellular protein that likely functions as an alpha-beta hydrolase and is required for normal cuticle formation. Homozygous mutant plants are dwarfed and have abnormal leaves, collapsed cells, reduced numbers of trichomes. The specific role of BDG is unclear: it may function in cutin biosynthesis or as a cross-linking enzyme in the cell wall itself.	BDG1,CED1	0.373134210149229	0.00160969842087763
AT1G64700	PADRE protein up-regulated after infection by S. sclerotiorun.	NA	0.882395197453592	0.0343470880491814
AT1G64710	GroES-like zinc-binding alcohol dehydrogenase family protein;(source:Araport11)	NA	0.35844793325707	0.0396450552259287
AT1G64750	Involved in the maintenance of genome integrity through homologous recombination. This function of DSS1 is performed through its interaction with the BRCA2 protein.	ATDSS1(I),DSS1(I)	0.748780424159501	0.0336954441876973
AT1G64990	Encodes a GPCR-type G protein receptor with nine predicted transmembrane domains. The protein binds abscisic acid (ABA) and is predicted to function as an ABA receptor. It has GTP-binding and GTPase activity and binds to ABA more effectively in the presence of GDP. GTG1 binds to GPA1, the alpha subunit of the heterotrimeric G protein. GPA1 (in its GTP-bound state) affects the GTP binding and GTPa…	GTG1	0.499720280711859	0.00158498801753158
AT1G65090	nucleolin;(source:Araport11)	NA	3.77721912828409	0.0447175310151323
AT1G65180	Cysteine/Histidine-rich C1 domain family protein;(source:Araport11)	NA	0.723301138195792	0.0016403031257453
AT1G65220	ARM repeat superfamily protein;(source:Araport11)	NA	0.753150034493931	3.95070128629391e-16
AT1G65280	DNAJ heat shock N-terminal domain-containing protein;(source:Araport11)	NA	0.992115783494418	8.01775516644538e-12
AT1G65290	Encodes a member of the mitochondrial acyl carrier protein (ACP) family that forms part of the membrane arm of mitochondrial complex and contributes to the mitochondrial respiratory chain. The mRNA is cell-to-cell mobile. The designations of mtACP-1 and mtACP-2 in Klusch et al. 2021 (DOI:10.1093/plcell/koab092)are flipped with respect to the nomenclature published by Meyer et al. 2007 (DOI:10.100…	mtACP2	0.273386468939421	0.00338535982916512
AT1G65310	Encodes a xyloglucan endotransglucosylase/hydrolase with only only the endotransglucosylase (XET; EC 2.4.1.207) activity towards xyloglucan and non-detectable endohydrolytic (XEH; EC 3.2.1.151) activity. Expressed in the mature or basal regions of both the main and lateral roots, but not in the tip of these roots where cell division occurs.	ATXTH17,XTH17	2.01105515835602	5.60195181774558e-14
AT1G65330	Type I MADS-box protein, regulated by MEA and FIE, expressed transiently after fertilization in embryo and endosperm.	AGL37,PHE1	1.95779982372315	0.00306581128606753
AT1G65370	TRAF-like family protein;(source:Araport11)	NA	1.103435706926	8.82408363539383e-12
AT1G65430	IBR domain-containing protein;(source:Araport11)	ARI8,ATARI8	0.317533341155032	0.00434179823186079
AT1G65440	Related to yeast Spt6 protein, which functions as part of a protein complex in transcription initiation and also plays a role in chromatin structure / assembly. It encodes a putative WG/GW-repeat protein involved in the regulation of apical-basal polarity of embryo	GTB1,SPT6L	0.681417628497668	1.0478643251182e-14
AT1G65580	Endonuclease/exonuclease/phosphatase family protein;(source:Araport11)	FRA3	0.604540843437935	1.52175143707726e-14
AT1G65660	Encodes a CCHC zinc finger protein that may function as a step II splicing factor. In an epigenetic allele of SMP1 (in which SMP1 and SMP2 mRNA is reduced) organs are smaller and contain fewer cells.	SMP1	1.03401610273925	5.59010313530153e-07
AT1G65840	encodes a peroxisomal polyamine oxidase, involved in the back-conversion polyamine degradation pathway. Among the five polyamine oxidases in the Arabidopsis genome, PAO4 is the major isoform in root peroxisomes. The mRNA is cell-to-cell mobile.	ATPAO4,PAO4	0.362678757633037	0.000132956554100455
AT1G65920	Regulator of chromosome condensation (RCC1) family with FYVE zinc finger domain-containing protein;(source:Araport11)	NA	2.10574160014707	2.46727017703236e-42
AT1G65930	Encodes a NADP+-isocitrate dehydrogenase that is believed to function in the cytosol. It appears to contribute to NADPH production under oxidative stress, and thereby to participate in redox signalling linked to defense responses. The mRNA is cell-to-cell mobile.	cICDH	0.558113980243125	9.10510815632428e-16
AT1G65970	thioredoxin-dependent peroxidase 2	TPX2	1.12451489302438	3.3665349585895e-23
AT1G65985	transmembrane protein, putative (DUF247);(source:Araport11)	NA	0.688805682768593	4.34796333217232e-05
AT1G66040	predicted to encode a protein with an N-terminal PHD domain and two RING domains surrounding an SRA domain. Attempts to isolate ORTH4/VIM4 cDNA through RT-PCR were unsuccessful and analysis of the expression of this gene is difficult since it shares 99% nucleotide identity with ORTH5/VIM2.	ORTH4,VIM4	1.11959046350461	0.0475234202211594
AT1G66140	Encodes a zinc finger protein containing only a single zinc finger.	ZFP4	0.661657296208391	5.46199110873245e-05
AT1G66150	Receptor-like transmembrane kinase I (TMK1); key regulator in auxin signaling. High auxin and TMK1 play essential and positive roles in ABA signaling through regulating ABA INSENSITIVE 1 and 2 (ABI1/2). Inhibits the phosphatase activity of ABI2 by direct phosphorylation of threonine 321 (T321), a conserved phosphorylation site in ABI2 proteins, whose phosphorylation status is important for both a…	TMK1	0.206494537071968	0.0229315886300001
AT1G66180	The gene encodes a putative aspartyl protease (ASP). Its expression is induced in response to light and ascorbate. The mRNA is cell-to-cell mobile.	NA	0.793465207254861	7.47303018652412e-10
AT1G66260	RNA-binding (RRM/RBD/RNP motifs) family protein;(source:Araport11)	ALY3	0.561845064418916	5.33183376485495e-05
AT1G66270	BGLU21 encodes a beta-glucosidase that has a high level of activity against the naturally occuring secondary metabolite scopolin. Recombinant BGLU21 produced in insect cells shows lower levels of activity using the structurally similar substrates esculin (33%) and 4-MU-glucoside (9%). BGLU21 is glycosylated in planta and has a C-terminal ER retention signal. Transcript analysis as well as protein…	BGLU21	1.24855180515154	1.96651534990573e-24
AT1G66280	Glycosyl hydrolase superfamily protein;(source:Araport11)	BGLU22	1.56560913753675	6.06278909230011e-55
AT1G66350	Negative regulator of GA responses, member of GRAS family of transcription factors. Also belongs to the DELLA proteins that restrain the cell proliferation and expansion that drives plant growth. RGL1 may be involved in reducing ROS accumulation in response to stress by up-regulating the transcription of superoxide dismutases. Rapidly degraded in response to GA. Involved in flower and fruit devel…	RGL,RGL1	1.76699473617323	1.68507532373767e-27
AT1G66400	Encodes a calmodulin-like protein. Regulates nitric oxide levels and transition to flowering.	CML23	2.2915016770838	0.00370472117560801
AT1G66410	encodes a calmodulin	ACAM-4,CAM4	1.06436044724235	5.67011805771036e-09
AT1G66450	Cysteine/Histidine-rich C1 domain family protein;(source:Araport11)	NA	1.63430521236265	1.30555043522199e-07
AT1G66460	Protein kinase superfamily protein;(source:Araport11)	NA	2.27718073489417	0.00551058586378566
AT1G66500	Pre-mRNA cleavage complex II;(source:Araport11)	NA	0.650192325839131	0.0217495615493313
AT1G66580	senescence associated gene 24;(source:Araport11)	RPL10C,SAG24	0.588057603841672	4.47335928921381e-08
AT1G66680	unknown function	AR401	0.7082190163396	6.84863473332267e-13
AT1G66700	A member of the Arabidopsis SABATH methyltransferase gene family. Encodes PXMT1, a methyltransferase that methylates 1,7-paraxanthine.	PXMT1	3.2159866775415	2.59750510576214e-06
AT1G66730	Encodes a novel plant specific DNA ligase that is involved in seed germination and DNA repair.	AtLIG6,LIG6	0.256598113911682	0.0140660748073781
AT1G66780	MATE efflux family protein;(source:Araport11)	NA	4.29700185628822	4.3652778568621e-08
AT1G66870	Carbohydrate-binding X8 domain superfamily protein;(source:Araport11)	NA	3.24678642398263	0.000157933287589683
AT1G66890	50S ribosomal-like protein;(source:Araport11)	NA	0.799147006548854	0.0024596273493319
AT1G67040	DnaA initiator-associating protein;(source:Araport11)	TRM22	0.476672328857772	0.00515545360810991
AT1G67050	membrane-associated kinase regulator;(source:Araport11)	NA	0.402510419551471	0.0385083522407238
AT1G67100	LOB domain-containing protein 40;(source:Araport11)	LBD40	2.96541230231833	0.00266545238224451
AT1G67105	other_RNA;(source:Araport11)	NA	0.45522731569783	0.0352355184587521
AT1G67110	cytochrome P450, family 735, subfamily A, polypeptide 2;(source:Araport11)	CYP735A2	1.22267607705982	2.00304077404502e-14
AT1G67190	F-box/RNI-like superfamily protein;(source:Araport11)	NA	0.533273688916163	0.00127314387133503
AT1G67230	Encodes a nuclear coiled-coil protein related to the carrot peripheral nuclear protein NMCP1 that is involved in the determination of plant nuclear structure. Member of a small gene family in Arabidopsis containing 4 proteins (LNC1-4 or CRWN 1-4) with redundant functions in protection from oxidative damage, control of nuclear morphology and degradation of ABI5.	AtLINC1,CRWN1,KAKU2,LINC1	0.832788102693981	1.9299407402885e-21
AT1G67250	Proteasome maturation factor UMP1;(source:Araport11)	NA	0.338361435849846	0.0103018884630542
AT1G67265	ROTUNDIFOLIA like 21;(source:Araport11)	DVL3,RTFL21	7.51373306430437	6.08627604345467e-09
AT1G67270	Zinc-finger domain of monoamine-oxidase A repressor R1 protein;(source:Araport11)	NA	2.11848993552224	0.00144420641932301
AT1G67300	Major facilitator superfamily protein;(source:Araport11)	NA	0.731729205987627	6.28655381090813e-07
AT1G67310	Calmodulin-binding transcription activator protein with CG-1 and Ankyrin domain;(source:Araport11)	NA	0.295212608365777	0.000477979950073834
AT1G67328	Natural antisense transcript overlaps with AT1G67330;(source:Araport11)	NA	0.729237594715373	0.0251673699399177
AT1G67340	HCP-like superfamily protein with MYND-type zinc finger;(source:Araport11)	NA	0.250894629781514	0.022206366460028
AT1G67350	NADH-ubiquinone oxidoreductase;(source:Araport11)	NA	0.363701227770611	0.000940272963029303
AT1G67480	Galactose oxidase/kelch repeat superfamily protein;(source:Araport11)	NA	0.7448869889241	3.31389789022267e-24
AT1G67500	Encodes the catalytic subunit of DNA polymerase zeta.Mutants are sensitive to UV-B radiation. Gene is involved in damage-tolerance mechanisms through translesion synthesis(TLS).	ATREV3,REV3	0.227407632148649	0.0310682901513857
AT1G67550	Encodes a nickel-containing urea hydrolase involved in nitrogen recycling. It requires three urease accessory proteins for its activation. The mRNA is cell-to-cell mobile.	URE	0.693628401756039	4.36875942221849e-05
AT1G67560	PLAT/LH2 domain-containing lipoxygenase family protein;(source:Araport11)	ATLOX6,LOX6	0.301596423264847	0.00562910915793587
AT1G67580	Protein kinase superfamily protein;(source:Araport11)	CDKG2	0.586791558662608	3.04775481214504e-14
AT1G67590	Remorin family protein;(source:Araport11)	NA	2.31193006381759	5.53489931116614e-18
AT1G67600	Acid phosphatase/vanadium-dependent haloperoxidase-related protein;(source:Araport11)	NA	0.736556684289581	0.00518739253531523
AT1G67792	Natural antisense transcript overlaps with AT1G67790;(source:Araport11)	NA	0.307247713114507	0.0397276308462376
AT1G67810	Encodes a protein capable of stimulating the cysteine desulfurase activity of CpNifS (AT1G08490) in vitro. SufE2:GFP localizes to the chloroplasts where it is likely to play a role in iron-sulfur cluster assembly. Transcript levels for this gene are high in the pollen relative to other organs based on RT-PCR analysis. The mRNA is cell-to-cell mobile.	SUFE2	4.16160378979166	1.66742301192963e-74
AT1G67860	transmembrane protein;(source:Araport11)	NA	3.23399644940748	0.0167285628929934
AT1G67865	hypothetical protein;(source:Araport11)	NA	2.91991885513447	2.93017037704177e-05
AT1G67870	glycine-rich protein;(source:Araport11)	NA	0.523308816284418	0.000378744325709025
AT1G67910	hypothetical protein;(source:Araport11)	NA	5.19672841597414	1.51974729756637e-113
AT1G67920	hypothetical protein;(source:Araport11)	NA	1.19837446054119	0.0113072433189007
AT1G67940	member of NAP subfamily The mRNA is cell-to-cell mobile.	ABCI17,ATNAP3,AtSTAR1,NAP3,NAP3	0.902555363405402	2.97460193180166e-09
AT1G68020	Encodes an enzyme putatively involved in trehalose biosynthesis. The protein has a trehalose synthase (TPS)-like domain and a trehalose phosphatase (TPP)-like domain. It can complement a yeast mutant lacking both of these activities suggesting that this is a bifunctional enzyme.	ATTPS6,TPS6	1.33973479458371	5.24966842860546e-36
AT1G68050	Encodes FKF1, a flavin-binding kelch repeat F box protein, is clock-controlled, regulates transition to flowering. Forms a complex with GI on the CO promoter to regulate CO expression.	ADO3,FKF1	0.840039624066628	0.000317576586425597
AT1G68060	Encodes a microtubule associated protein (MAP70-1). Expressed in all tissues.	ATMAP70-1,MAP70-1	1.02265144621579	3.97511409390072e-19
AT1G68100	member of IAA-alanine resistance protein 1	IAR1	0.663618699525929	6.86107881261779e-09
AT1G68110	An ENTH (Epsin NH2 terminal homology)/ANTH/VHS superfamily protein with adenylate cyclase activity and a role in clathrin assembly and endocytosis.	ClAP,EAP1,PICALM9b	1.31601084448996	2.64734174820674e-06
AT1G68140	zinc finger/BTB domain protein, putative (DUF1644);(source:Araport11)	NA	0.840288430940017	4.79102164708968e-23
AT1G68190	B-box zinc finger family protein;(source:Araport11)	BBX27	0.967448396140238	2.48457253658977e-21
AT1G68200	Zinc finger C-x8-C-x5-C-x3-H type family protein;(source:Araport11)	AtC3H15,CDM1	0.94158374001125	0.033407764616229
AT1G68220	aerobic coproporphyrinogen-III oxidase (DUF1218);(source:Araport11)	NA	0.584211160222606	0.000247689545351133
AT1G68300	Adenine nucleotide alpha hydrolases-like superfamily protein;(source:Araport11)	NA	0.398176946475404	0.000878886689860998
AT1G68330	membrane-associated kinase regulator;(source:Araport11)	NA	1.10663043100719	4.12251765811065e-05
AT1G68490	translocase subunit seca;(source:Araport11)	NA	0.777123481765816	1.1837883862509e-24
AT1G68500	hypothetical protein;(source:Araport11)	NA	4.18988174608107	1.19765317112886e-07
AT1G68520	B-box type zinc finger protein with CCT domain-containing protein;(source:Araport11)	BBX14	0.5774110785266	5.68863811355123e-06
AT1G68550	encodes a member of the ERF (ethylene response factor) subfamily B-6 of ERF/AP2 transcription factor family. The protein contains one AP2 domain. There are 12 members in this subfamily including RAP2.11.	CRF10	0.262841303676382	0.0122646396835033
AT1G68560	Encodes a bifunctional alpha-l-arabinofuranosidase/beta-d-xylosidase that belongs to family 3 of glycoside hydrolases.	ATXYL1,AXY3,GH31,TRG1,XYL1	0.460398531040812	5.52262494067899e-13
AT1G68580	Agenet and bromo-adjacent homology (BAH) domain-containing protein;(source:Araport11)	NA	0.684099726493522	7.48328259089543e-09
AT1G68620	alpha/beta-Hydrolases superfamily protein;(source:Araport11)	NA	0.583184364388694	0.00131087776567283
AT1G68670	HHO2 is a HRS1 homolog. Nitrate-inducible expression. Also induced in roots by low Pi and is likely involved in maintaining phosphate homeostasis. It is target of PHR1.Both HHO2 and HRS1 are involved in Ni cross regulation of Pi signaling. They function as transcriptional repressors of SPX1, SPX2, and SPX4 as part of a cascade to regulate nitrogen and phosphorus balance. Transcriptional repressor…	HHO2,NIGT1.2	1.09103834123039	1.14478936329412e-24
AT1G68710	ATPase E1-E2 type family protein / haloacid dehalogenase-like hydrolase family protein;(source:Araport11)	NA	0.524571820350372	2.61429809819487e-08
AT1G68820	Putative C3HC4 zinc-finger ubiquitin E3 ligase, negative regulator in ABA and drought stress response. May act as a positive role in regulating the high temperature by mediating the degradation of unknown target proteins.	PPRT1	0.48410268181628	1.16240532231321e-06
AT1G68840	Rav2 is part of a complex that has been named `regulator of the (H+)-ATPase of the vacuolar and endosomal membranes' (RAVE) The mRNA is cell-to-cell mobile.	AtRAV2,EDF2,RAP2.8,RAV2,TEM2	1.06573955752064	3.64066148462864e-36
AT1G69020	Prolyl oligopeptidase family protein;(source:Araport11)	NA	1.49559636577345	1.34314084722608e-08
AT1G69030	BSD domain-containing protein;(source:Araport11)	NA	0.80412468662311	4.47332289334473e-05
AT1G69040	ACT-domain containing protein involved in feedback regulation of amino acid metabolism	ACR4	2.82530253116492	2.13120369591532e-200
AT1G69080	Adenine nucleotide alpha hydrolases-like superfamily protein;(source:Araport11)	NA	1.65309055650339	0.00123284519362861
AT1G69220	Encodes serine/threonine kinase 1 (SIK1), a Hippo homolog. Regulates cell proliferation and cell expansion.	SIK1	0.869578852616354	2.58039791879106e-21
AT1G69252	other_RNA;(source:Araport11)	NA	0.532589309734491	7.80260755055147e-07
AT1G69260	ABI five binding protein;(source:Araport11)	AFP1	0.688536311367946	0.000618704809406943
AT1G69270	RPK1 is a leucine-rich receptor-like kinase located in the plasma membrane which is upregulated by abscisic acid, dehydration, high salt, low temperature, but not by other plant hormones. RPK1 knock-out and antisense plants show an ABA-insensitive phenotype. RPK1 plays a role in ABA-controlled cell proliferation and is a regulator of the ABA signal transduction pathway. Overexpression of the LRR …	AtRPK1,RPK1	0.870420655055479	6.83188059307523e-11
AT1G69280	hypothetical protein;(source:Araport11)	NA	0.715104716085467	0.02203654629717
AT1G69360	T-box transcription factor, putative (DUF863);(source:Araport11)	NA	0.56550638151406	1.32584574284491e-06
AT1G69410	Encodes eIF5A-2, a putative eukaryotic translation initiation factor. There are three eIF5A coding genes in Arabidopsis: eIF5A-1/At1g13950, eIF5A-2/At1g26630 and eIF5A-3/At1g69410.	ATELF5A-3,ELF5A-3	0.580637130184034	4.97022061899269e-08
AT1G69440	Encodes ARGONAUTE7, a member of the ARGONAUTE family, characterised by the presence of PAZ and PIWI domains. Involved in the regulation of developmental timing. Required for the accumulation of TAS3 ta-siRNAs but not for accumulation of miR171, miR173, miR390 or mi391. Localized in mature rosette leaves and floral buds.	AGO7,ZIP	0.731457514965254	2.20003708990771e-07
AT1G69490	Encodes a member of the NAC transcription factor gene family. It is expressed in floral primordia and upregulated by AP3 and PI. Its expression is associated with leaf senescence. The mRNA is cell-to-cell mobile.	ANAC029,ATNAP,NAP	4.50776637129936	1.50065030906971e-31
AT1G69510	cAMP-regulated phosphoprotein 19-related protein;(source:Araport11)	NA	0.707467778898223	9.61853873495064e-07
AT1G69526	S-adenosyl-L-methionine-dependent methyltransferases superfamily protein;(source:Araport11)	NA	1.1447520611411	2.42820586977304e-24
AT1G69570	CDF5 is a circadian regulated transcript that is antiphasic with respect to its natural antisense transcript (NAT) FLORE (AT1G69572).CDF5 transcript accumulation delays flowering. CDF5 links circadian oscillation and photoperiodism.	CDF5	1.6364108909787	9.52785187750182e-17
AT1G69572	Circadian regulated lncRNA, natural antisense gene of CDF5 (AT1G69570). Displays antiphasic expression pattern in relation to CDF5 expression (PMID:28758689).	FLORE	1.14235504149128	0.0225639241530489
AT1G69690	AtTCP15 is involved in the regulation of endoreduplication. Modulates GA-dependent stamen filament elongation by direct activation of SAUR63 subfamily genes through conserved target sites in their promoters.	AtTCP15,TCP15	0.356571843701365	0.0262390371268466
AT1G69750	cytochrome c oxidase 19-2;(source:Araport11)	ATCOX19-2,COX19-2	0.933487340993562	0.00125597374513804
AT1G69840	SPFH/Band 7/PHB domain-containing membrane-associated protein family;(source:Araport11)	AtHIR1	0.814364304995577	1.2637512886282e-05
AT1G69890	Encodes a member of a conserved DUF domain family that is induced by NO. Based on mutant phenotype may be involved in NO stress response.	NA	0.789130723353971	1.04210489751829e-06
AT1G70060	Encodes a homolog of the transcriptional repressor SIN3 (AT1G24190). The mRNA is cell-to-cell mobile.	SNL4	0.33867917927352	0.000268225300932199
AT1G70130	Concanavalin A-like lectin protein kinase family protein;(source:Araport11)	LecRK-V.2	2.57481342243351	0.0177619609804151
AT1G70180	Sterile alpha motif (SAM) domain-containing protein;(source:Araport11)	NA	0.620764405943051	5.51181783511996e-11
AT1G70260	Encodes an endoplasmic reticulum (ER)-localized nodulin MtN21-like transporter family protein that negatively regulates resistance against biotrophic pathogens but not the necrotrophic pathogen, B. cinerea, possibly by regulating ROS production, cell death and PR1 expression.	RTP1,UMAMIT36	5.96457489594815	3.2249704438673e-45
AT1G70290	Encodes an enzyme putatively involved in trehalose biosynthesis. Though the protein has both trehalose-6-phosphate synthase (TPS)-like and trehalose-6-phosphate phosphatase (TPP)-like domains, neither activity has been detected in enzymatic assays nor has the protein been able to complement yeast TPS or TPP mutants.	ATTPS8,ATTPSC,TPS8	0.64310330883985	1.27463908750179e-12
AT1G70310	Spermidine synthase.	SPDS2	0.311975502589335	0.00477761862819825
AT1G70330	encodes an adenosine transporter that catalyze a proton-dependent adenosine transport. The mRNA is cell-to-cell mobile.	ENT1,ENT1,AT	0.250541461182388	0.014285737353432
AT1G70420	DNA ligase-like protein, putative (DUF1645);(source:Araport11)	NA	0.629677149494743	0.0108668308224678
AT1G70480	Protein residing in the chloroplast outer membrane, has channel-like properties facilitating the export of the jasmonate precursor 12-oxophytodienoic acid (OPDA) from the chloroplast.	NA	0.509884604770288	0.000109976445961555
AT1G70530	Encodes a cysteine-rich receptor-like protein kinase.	CRK3	0.483641689369569	6.08304101209003e-06
AT1G70560	TAA1 is involved in the shade-induced production of indole-3-pyruvate (IPA), a precursor to IAA, a biologically active auxin. It is also involved in regulating many aspects of plant growth and development from embryogenesis to flower formation and plays a role in ethylene-mediated signaling. This enzyme can catalyze the formation of IPA from L-tryptophan. Though L-Trp is expected to be the prefer…	CKRC1,SAV3,TAA1,TIR2,WEI8	1.73679245166797	3.77533823350053e-27
AT1G70570	anthranilate phosphoribosyltransferase;(source:Araport11)	NA	0.549310811100407	3.33535654429125e-07
AT1G70590	F-box family protein;(source:Araport11)	NA	0.500624193167585	4.18440707312984e-05
AT1G70600	Ribosomal protein L18e/L15 superfamily protein;(source:Araport11)	NA	0.474796403281744	5.51418153123772e-09
AT1G70620	cyclin-like protein;(source:Araport11)	NA	0.600050961070231	2.45123171855005e-12
AT1G70690	Encodes a plasmodesmal protein that may be involved in the intercellular movement of molecules through the plasmodesmata. The protein has two DUF26 domains and a single transmembrane domain.	HWI1,PDLP5	0.704630479658442	0.000407303621074868
AT1G70710	endo-1,4-beta-glucanase. Involved in cell elongation.	ATGH9B1,CEL1,GH9B1	2.86179592410596	9.75724611625305e-191
AT1G70740	Protein kinase superfamily protein;(source:Araport11)	NA	0.514685698343672	0.00204670068206226
AT1G70770	Involved in cell wall modifications resulting in resistance to the biotroph Hpa.	NA	0.57367747488021	6.37750933373114e-17
AT1G70830	MLP-like protein 28;(source:Araport11)	MLP28	0.456761754686137	4.61861466669245e-05
AT1G70950	Microtubule-stabilizing protein. Module with MREL57 regulates microtubule disassembly to mediate stomatal closure in response to drought stress and ABA treatment. MREL57 interacts with, ubiquitinates and degrades WDL7, effect is enhanced by ABA.	NA	1.12279488555263	0.000904547459229375
AT1G70980	Class II aminoacyl-tRNA and biotin synthetases superfamily protein;(source:Araport11)	SYNC3	0.517340493711193	8.89980924267797e-07
AT1G70990	Short extensin family protein required during the first phase of dark-grown hypocotyl elongation, regulates the moment and extent of the growth acceleration by modulating cell wall extensibility.	NA	1.19021156451267	2.90186757986933e-05
AT1G71010	Encodes a protein that is predicted to act as a phosphatidylinositol-3P 5-kinase, but, because it lacks a FYVE domain, it is unlikely to be efficiently targeted to membranes containing the proposed phosphatidylinositol-3P substrate. Therefore, its molecular function remains unknown. The mRNA is cell-to-cell mobile.	FAB1C	0.392557011595029	3.42747469295695e-08
AT1G71020	Encodes a nuclear localized plant U-Box protein that interacts with MYC2 and regulates its stability by acting as an E3 ubiquitin ligase and polyubiquitinating MYC2. By this mechanism, it targets MYC2 for destruction thereby affecting JA signaling.	PUB10	0.432650158598934	2.61485056803153e-05
AT1G71080	RNA polymerase II transcription elongation factor;(source:Araport11)	NA	0.524877249753183	1.51497288108502e-05
AT1G71110	transmembrane protein;(source:Araport11)	NA	1.15687341581606	4.90714915656126e-25
AT1G71350	eukaryotic translation initiation factor SUI1 family protein;(source:Araport11)	NA	0.39446842038513	0.0162944932043093
AT1G71360	Encodes a member of the mid-SUN subfamily of SUN-domain proteins that is localized to both the nuclear envelope and the ER. It is involved in early seed development and nuclear morphology.	AtSUN4,SUN4	1.00842185479303	1.31488883893051e-05
AT1G71410	One of two paralogs in Arabidopsis.SCYL2B is a membrane localized protein that interacts with components of clathrin-mediated vesicle trafficking pathways. Loss of both SCYL2B and .SCYL2A results in severe growth defects.	SCYL2B	1.03844579145825	6.97073273921736e-44
AT1G71692	Encodes a member of the MADS box family of transcription factors. Involved in root cell differentiation and flowering time. Loss of function mutations have abnormal cellular differentiation in the roots and are late flowering. AGL12 along with AGL14, and AGL17 is preferentially expressed in root tissues and represent the only characterized MADS box genes expressed in roots.	AGL12,XAL1	1.09220377726951	0.00532341285836687
AT1G71697	Encodes choline kinase. mRNA levels are increased in response to wounding. The mRNA is cell-to-cell mobile.	ATCK1,CEK1,CK,CK1	0.719155048769929	4.90775956775274e-07
AT1G71710	DNAse I-like superfamily protein;(source:Araport11)	NA	0.64487607414722	1.68635980876178e-08
AT1G71720	Encodes a chloroplast localized protein that regulates the translation of Ycf1 by binding to its mRNA. It is involved in the biogenesis of photosynthetic complexes.	PBR1,PDE338,RLSB	0.501432505351119	0.000322237924609332
AT1G71740	nucleolar protein;(source:Araport11)	NA	1.85062160284687	7.9949002690602e-05
AT1G71790	Encodes a heterodimeric actin binding protein composed of an alpha and a beta sumunit. Stabilizes actin filament cytoskeleton by capping.	AtCPB,CPB	0.704900773216845	2.50636538252148e-07
AT1G71870	Metabolite transporter involved in the anthocyanin response to anthocyanin induction conditions. Affects ABA signaling and localization.	bige1a	0.688878320895467	0.00329847084362459
AT1G71900	magnesium transporter, putative (DUF803);(source:Araport11)	ENOR3L4	0.355394446481843	0.012681180235256
AT1G71950	SPI-1 is a member of the I9 inhibitor family. It is an inhibitor of SBT4.13 subtilase.	SPI-1	0.333449125800026	0.00425067353227465
AT1G71960	Encodes a plasma membrane localized ABC transporter involved in abscisic acid transport and responses.	ABCG25,ATABCG25	0.446567393823092	6.54584148720631e-05
AT1G71970	hypothetical protein;(source:Araport11)	NA	1.06513398070307	6.67318499264759e-23
AT1G71980	RMR2 is a secretory pathway protein localized to the trans-golgi network. It belongs to a family of vacuolar sorting receptors. If forms heterodimers with RMR1.	RMR2	0.21665232122951	0.00544090023217013
AT1G71990	This gene encodes a Lewis-type alpha 1,4-fucosyltransferase	ATFT4,ATFUT13,FT4-M,FUCTC,FUT13	0.781024239480774	4.22579567463847e-05
AT1G72000	Plant neutral invertase family protein;(source:Araport11)	A/N-InvF	3.47032307541758	0.0258846402508067
AT1G72050	Encodes a transcriptional factor TFIIIA required for transcription of 5S rRNA gene. 5S rRNA is the smallest constituent of the ribosome. Work on one of the gene models AT1G72050.2 showed that it encodes a protein with nine Cys(2)-His(2)-type zinc fingers, a characteristic feature of TFIIIA proteins. AT1G72050.2 also contains a 23 amino acid spacer between fingers 1 and 2, a 66 amino acid spacer b…	TFIIIA	0.624902838265112	6.99385256009832e-06
AT1G72070	Chaperone DnaJ-domain superfamily protein;(source:Araport11)	NA	2.71263561703017	3.21811046271579e-52
AT1G72150	novel cell-plate-associated protein that is related in sequence to proteins involved in membrane trafficking in other eukaryotes The mRNA is cell-to-cell mobile.	PATL1	1.03427192049488	5.91681387351095e-32
AT1G72180	Encodes a leucine-rich repeat receptor kinase that functions as a receptor for CEP1 peptide. Mediates nitrate uptake signaling.	CEPR2	0.271797285675408	0.0101541860698771
AT1G72200	RING/U-box superfamily protein;(source:Araport11)	NA	0.872841962570339	1.64947842186758e-17
AT1G72340	NagB/RpiA/CoA transferase-like superfamily protein;(source:Araport11)	NA	0.453489608637572	0.000388862562751211
AT1G72410	COP1-interacting protein-like protein;(source:Araport11)	NA	1.47008053001352	3.28748901986338e-54
AT1G72470	A member of EXO70 gene family, putative exocyst subunits, conserved in land plants. Arabidopsis thaliana contains 23 putative EXO70 genes, which can be classified into eight clusters on the phylogenetic tree.	ATEXO70D1,EXO70D1	1.24314980712524	4.50174904144113e-17
AT1G72520	PLAT/LH2 domain-containing lipoxygenase family protein;(source:Araport11)	ATLOX4,LOX4	0.446323007790236	0.00576506906179366
AT1G72600	hydroxyproline-rich glycoprotein family protein;(source:Araport11)	NA	1.33065853789594	7.4008707396011e-06
AT1G72650	Arabidopsis thaliana myb family transcription factor (At1g72650)	TRFL6	0.818535946583616	5.01685414889573e-13
AT1G72680	cinnamyl-alcohol dehydrogenase;(source:Araport11)	ATCAD1,CAD1	0.629537363263219	3.88920499599944e-05
AT1G72790	hydroxyproline-rich glycoprotein family protein;(source:Araport11)	NA	0.535249746804545	4.35003480557894e-05
AT1G72820	Mitochondrial substrate carrier family protein;(source:Araport11)	NA	1.04205610821478	6.74213848950671e-21
AT1G72840	NBS TIR LRR protein. It is induced in response to bacterial pathogens and overexpression results in cell death in leaves.	NA	1.09972293904865	1.22457039452537e-22
AT1G72850	Disease resistance protein (TIR-NBS class);(source:Araport11)	NA	0.541213526358943	0.0306909319402154
AT1G72852	Natural antisense transcript overlaps with AT1G72850;(source:Araport11)	NA	0.828843953999753	3.40169725607632e-05
AT1G73020	anoctamin-like protein;(source:Araport11)	NA	0.390651501181989	0.0174154353987421
AT1G73066	Leucine-rich repeat family protein;(source:Araport11)	NA	1.12969858997327	1.21919044934483e-09
AT1G73080	Encodes a leucine-rich repeat receptor kinase. Functions as a receptor for AtPep1 to amplify innate immunity response to pathogen attacks. The mRNA is cell-to-cell mobile.	ATPEPR1,PEPR1	0.522071591730596	1.23930482845987e-08
AT1G73090	WD repeat protein;(source:Araport11)	NA	1.05068828898028	5.43946074254224e-13
AT1G73120	F-box/RNI superfamily protein;(source:Araport11)	NA	5.60149318122475	1.28549112284284e-111
AT1G73130	ATG8A/F interacting protein containing a WxxL LIR motif at the C terminus which is essential for interaction with ATG8. Stress (abiotic or biotic) results in the formation of ATG8- and ATI3-labeled punctate structures, likely reflecting increased formation of ATG8-labeled phagophores or autophagosomes. ATI3 proteins probably act as selective autophagy receptors that target specific cellular compo…	ATI3C	0.342573257913777	0.0172150247182908
AT1G73160	UDP-Glycosyltransferase superfamily protein;(source:Araport11)	NA	0.825131697081157	0.0428716874602991
AT1G73180	Eukaryotic translation initiation factor eIF2A family protein;(source:Araport11)	NA	0.336230097456437	0.00330044627481324
AT1G73200	testis-expressed sequence 2-like protein (DUF2404);(source:Araport11)	NA	0.226793163104793	0.0393752970888104
AT1G73220	Encodes Organic Cation Transporter 1 (OCT1), likely to be involved in polyamine transport.	AtOCT1,OCT1	3.50841383080097	1.07666444533725e-35
AT1G73260	Encodes a trypsin inhibitor involved in modulating programmed cell death in plant-pathogen interactions.	ATKTI1,AtKTI4,KTI1	0.413786616240831	0.000146845277959431
AT1G73320	S-adenosyl-L-methionine-dependent methyltransferases superfamily protein;(source:Araport11)	NA	0.469242558432539	0.0323451942013982
AT1G73370	Encodes a protein with sucrose synthase activity (SUS6).	ATSUS6,SUS6	0.285435863630191	0.0393449542844453
AT1G73380	hypothetical protein;(source:Araport11)	NA	0.727789497163035	1.5568220786466e-08
AT1G73390	Endosomal targeting BRO1-like domain-containing protein;(source:Araport11)	NA	0.563427996320345	8.23839668156305e-05
AT1G73500	member of MAP Kinase Kinase family. Autophosphorylates and also phosphorylates MPK3 and MPK6. Independently involved in ethylene and calmalexin biosynthesis. Induces transcription of ACS2, ACS6, ERF1, ERF2, ERF5, ERF6, CYP79B2, CYP79B3, CYP71A13 and PAD3.	ATMKK9,MKK9	1.3713274816785	5.88948103555661e-17
AT1G73640	RAB GTPase homolog A6A;(source:Araport11)	AtRABA6a,RABA6a	1.18889367673477	0.000242839135337982
AT1G73720	Encodes SMU1, a protein involved in RNA splicing.	SMU1	0.420779745197324	0.000667692264653542
AT1G73960	Member of TFIID complex.	TAF2	0.246923372648637	0.00675685872681564
AT1G73980	TTM1 is a triphosphate tunnel metalloenzyme that displays pyrophosphatase activity. It contains both a uridine kinase (UK) domain,CYTH domain, a coiled-coil domain and a transmembrane domain at the C-terminal Mutants show a delay in leaf senescence. Can functionally complement TTM1 and vise versa. (PMID:28733390)	AtTTM1,TTM1	0.316123505145007	0.000946427856644898
AT1G74030	Encodes the plastid-localized phosphoenolpyruvate enolase. Mutant plants have abnormal trichomes, defects in fatty acid metabolism.	ENO1	0.776642675988455	2.17803248474734e-08
AT1G74050	Ribosomal protein L6 family protein;(source:Araport11)	NA	0.872396123206793	6.06659056357666e-20
AT1G74060	Ribosomal protein L6 family protein;(source:Araport11)	NA	0.361941276018272	5.8032574119919e-06
AT1G74230	encodes a glycine-rich RNA binding protein. The mRNA is cell-to-cell mobile.	GR-RBP5,ORRM4,RBGA2	0.804296828183802	1.39720009958569e-09
AT1G74320	encodes a choline kinase, whose expression is induced by high salt and mannitol.	CEK2	0.833121497555182	5.60377775197355e-06
AT1G74380	xyloglucan xylosyltransferase 5;(source:Araport11)	XXT5	0.21981603365926	0.02961285379802
AT1G74420	Predicted fucosyltransferase, based on similarity to FUT1, but not functionally redundantwith FUT1.	ATFUT3,FUT3	1.48642065087013	0.00106060301664889
AT1G74450	Plants overexpressing At1g74450 are stunted in height and have reduced male fertility.	NA	0.697519011999614	0.00353514645556931
AT1G74470	Encodes for a multifunctional protein with geranylgeranyl reductase activity shown to catalyze the reduction of prenylated geranylgeranyl-chlorophyll a to phytyl-chlorophyll a (chlorophyll a) and free geranylgeranyl pyrophosphate to phytyl pyrophosphate. The mRNA is cell-to-cell mobile.	NA	0.493549388922292	1.35171769747072e-09
AT1G74490	Protein kinase superfamily protein;(source:Araport11)	NA	2.56990568996124	5.28959683690529e-15
AT1G74510	Galactose oxidase/kelch repeat superfamily protein;(source:Araport11)	NA	0.425744586577993	0.00968974548115214
AT1G74690	Encodes a microtubule-associated protein.Member of IQ67 (CaM binding) domain containing family.	IQD31	0.325273806932663	0.000613313466252188
AT1G74740	member of Calcium Dependent Protein Kinase	ATCPK30,CDPK1A,CPK30	1.09751196768812	2.81781565910577e-15
AT1G74790	catalytics;(source:Araport11)	NA	0.921395381092018	2.56495659044488e-22
AT1G74800	Encodes a Golgi-localized hydroxyproline galactosyltransferase GALT5. Functions together with GALT2 as redundant GALTs that control AGP (arabinogalactan-proteins) O-glycosylation, which is essential for normal growth and development. Mutants display multiple phenotypes including reduced root hair growth.	GALT5	0.529686501641486	6.99094585562331e-05
AT1G74840	Homeodomain-like superfamily protein;(source:Araport11)	NA	0.3286290977097	0.00125390509708957
AT1G74880	Encodes subunit NDH-O of NAD(P)H:plastoquinone dehydrogenase complex (Ndh complex) present in the thylakoid membrane of chloroplasts. This subunit is thought to be required for Ndh complex assembly.	NDH-O,NdhO	0.37414238816623	0.000286643548075217
AT1G74910	KONJAC1 is imilar to sugar pyrophosphorylases but has an insertion of 2 AA in the pyrophosphorylase consensus motif that is highly conserved in GMPPs. It lacks GDP-mannose pyrophosphorylase activity but can simulate the GDP-mannose pyrophosphorylase activity of VTC1.	KJC1	0.467774174970546	1.0458218247146e-07
AT1G74920	ALDH10A8 encodes a protein that has not been functionally characterized, but it is similar to an Arabidopsis protein that has betaine aldehyde dehydrogenase and aminoaldehyde dehydrogenase activity. ALDH10A8 localizes to leucoplasts. aldh10a8 mutant plants are more susceptible to NaCl and dehydration stress.	ALDH10A8	1.49054145190865	2.00585127750713e-88
AT1G75110	Encodes an arabinosyltransferase that modifies extensin proteins in root hair cells.	RRA2	1.61224846995717	0.000108564985154025
AT1G75120	Encodes an arabinosyltransferase that modifies extensin proteins in root hair cells.	RRA1	1.39620059312437	1.10717286271225e-08
AT1G75125	plastid transcriptionally active protein;(source:Araport11)	NA	0.858999877057378	0.00426711600840162
AT1G75130	member of CYP721A	CYP721A1	1.05943553723856	1.5061757252403e-14
AT1G75140	membrane protein;(source:Araport11)	NA	0.597651422999303	1.47800341922317e-05
AT1G75180	Erythronate-4-phosphate dehydrogenase family protein;(source:Araport11)	NA	1.18416510199326	3.26360864889676e-36
AT1G75190	hypothetical protein;(source:Araport11)	NA	2.10611250400399	0.011451226885786
AT1G75220	Encodes a vacuolar glucose exporter that is induced in response to factors that activate vacuolar glucose pools like darkness, heat stress and wounding and repressed during conditions that trigger glucose accumulation in the vacuole like cold stress and external sugar supply.	AtERDL6,ERDL6	0.290003188162773	0.00101612701791719
AT1G75240	Encodes a zinc finger-homeodomain transcription factor ZHD5. Nuclear import and DNA binding of the ZHD5 transcription factor is modulated by a competitive peptide inhibitor MIF1 (AT1G74660).	AtHB33,HB33,ZHD5	1.81260713348623	1.83033973040824e-47
AT1G75295	Natural antisense transcript overlaps with AT1G75290 and AT1G75300;(source:Araport11)	NA	0.982755261123356	1.32136780578232e-11
AT1G75310	auxin-like 1 protein;(source:Araport11)	AUL1	1.1561927301169	2.42474215853298e-12
AT1G75390	basic leucine-zipper 44;(source:Araport11)	AtbZIP44,bZIP44	0.419266519243705	0.020285026039675
AT1G75420	UDP-Glycosyltransferase superfamily protein;(source:Araport11)	NA	0.366319741811382	0.0305812360967986
AT1G75430	BEL1-like homeodomain 11;(source:Araport11)	BLH11	1.66732781597301	0.0265236241981901
AT1G75450	This gene used to be called AtCKX6. It encodes a protein whose sequence is similar to cytokinin oxidase/dehydrogenase, which catalyzes the degradation of cytokinins.	ATCKX5,ATCKX6,CKX5	3.55858331375631	1.43620784204784e-158
AT1G75540	Encodes a B-box zinc finger transcription factor BBX21 (also named STH2/salt tolerance homolog2 and LHUS/long hypocotyl under shade). Interacts with COP1 to control de-etiolation. Also genetically interacts with COP1 to regulate shade avoidance. The mRNA is cell-to-cell mobile.	AtBBX21,BBX21,LHUS,STH2	0.807842332852133	4.15110560712522e-22
AT1G75580	SAUR-like auxin-responsive protein family;(source:Araport11)	SAUR51	1.12453089167988	2.65949725596192e-05
AT1G75590	SAUR-like auxin-responsive protein family;(source:Araport11)	SAUR52	2.33896364796092	4.3894288464185e-11
AT1G75620	Galactose oxydase; may function in tissues that require mechanical reinforcements in the absence of lignification.	NA	1.07198667898041	7.93193063676946e-08
AT1G75630	vacuolar H+-pumping ATPase 16 kD proteolipid (ava-p) mRNA, The mRNA is cell-to-cell mobile.	AVA-P4	0.921392618106129	4.7440154119391e-28
AT1G75660	Encodes a protein with similarity to yeast 5'-3'exonucleases and can functionally complement the yeast mutations. In Arabidopsis XRN3 acts as a suppressor of posttranscriptional gene silencing. Mutants accumulate excised miRNA products suggesting that XRN3 is involved in degradation of these products.	AtXRN3,XRN3	0.26957798574715	0.000572949353250286
AT1G75710	C2H2-like zinc finger protein;(source:Araport11)	NA	0.290896770664303	0.0191616757067625
AT1G75750	GA-responsive GAST1 protein homolog regulated by BR and GA antagonistically. Possibly involved in cell elongation based on expression data The mRNA is cell-to-cell mobile.	GASA1	1.93072361607308	1.02763488469028e-56
AT1G75770	hypothetical protein;(source:Araport11)	NA	0.930607674688942	0.00157525412535268
AT1G75780	beta tubulin gene downregulated by phytochrome A (phyA)-mediated far-red light high-irradiance and the phytochrome B (phyB)-mediated red light high-irradiance responses	TUB1	2.97128658849979	3.01681959763189e-108
AT1G75800	Pathogenesis-related thaumatin superfamily protein;(source:Araport11)	NA	0.561805307154019	5.82515992438481e-13
AT1G75840	Belongs to the plant-specific ROP group of Rho GTPases; localized to the plasma membrane of tips of root hairs; involved in polar growth control. The mRNA is cell-to-cell mobile.	ARAC5,ATGP3,ATROP4,ROP4	0.491221424243937	7.0702413180711e-06
AT1G75850	VPS35 homolog B;(source:Araport11)	LAZ4,VPS35B	0.52913894105585	1.78974989613717e-08
AT1G75900	GDSL-motif esterase/acyltransferase/lipase. Enzyme group with broad substrate specificity that may catalyze acyltransfer or hydrolase reactions with lipid and non-lipid substrates.	NA	1.11409350220538	1.39134397517374e-10
AT1G75950	SKP1 is core component of the SCF family of E3 ubiquitin ligases and serves to tether the rest of the complex to an F-box protein, which provides specificity in binding to ubiquitin ligase substrate proteins. Predominately expressed from leptotene to pachytene. Negatively regulates recombination. Interacts with P0, a silencing suppressor protein encoded by poleroviruses by means of a conserved mi…	ASK1,ATSKP1,SKP1,SKP1A,UIP1	0.309291718011806	0.00011409575868801
AT1G76010	Alba DNA/RNA-binding protein;(source:Araport11)	NA	0.304578872764519	2.2062573508389e-05
AT1G76090	Encodes S-adenosyl-methionine-sterol-C-methyltransferase, an enzyme in the sterol biosynthetic pathway.	SMT3	1.23022328593753	2.99319315122322e-32
AT1G76140	Putative prolyl oligopeptidase.	NA	0.21753330424924	0.0242343912739156
AT1G76150	Encodes a monofunctional enoyl-CoA hydratase 2, involved in the degradation of even cis-unsaturated fatty acids, gene expression is enhanced during the first 2 days of germination, as well as in senescent leaves.	ATECH2,ECH2	0.424505823781163	3.9461073609171e-05
AT1G76180	Encodes a dehydrin protein whose expression is induced early on in response to dehydration stress. This gene's expression to cold occurs in two waves, with early induction occurring within 1 h and secondary induction occurring 5 h after the beginning of cold stress. Expression is also induced in response to ABA but not in response to 2,4-D, BA, and GA3. ERD14 protein is capable of binding Ca2+, e…	ERD14	0.904516264955241	3.17779704528388e-13
AT1G76200	NADH dehydrogenase ubiquinone 1 beta subcomplex subunit;(source:Araport11)	NA	1.28562686834314	2.72355924899315e-23
AT1G76220	hypothetical protein (DUF241);(source:Araport11)	NA	1.74962869524544	0.00438211345366663
AT1G76240	DUF241 domain protein (DUF241);(source:Araport11)	NA	2.20931379295163	3.07218271408412e-41
AT1G76320	FAR1-related sequence 4;(source:Araport11)	CPD25,FRS4	0.362045652169096	0.00277865440595733
AT1G76380	DNA-binding bromodomain-containing protein, interacts with core SWI/SNF complex components.	NA	0.753644605482791	6.26435375610058e-07
AT1G76405	outer envelope pore 21B-like protein;(source:Araport11)	NA	0.730248185128694	0.00305903096479443
AT1G76410	RING/U-box superfamily protein;(source:Araport11)	ATL8	1.73771416692496	1.0664053725706e-20
AT1G76430	Encodes Pht1;9, a member of the Pht1 family of phosphate transporters which include: Pht1;1/At5g43350, Pht1;2/At5g43370, Pht1;3/At5g43360, Pht1;4/At2g38940, Pht1;5/At2g32830, Pht1;6/At5g43340, Pht1;7/At3g54700, Pht1;8/At1g20860, Pht1;9/At1g76430 (Plant Journal 2002, 31:341).	PHT19	1.5871910356929	0.00722412941932221
AT1G76460	RNA-binding (RRM/RBD/RNP motifs) family protein;(source:Araport11)	NA	0.322144234426856	0.00141922027670762
AT1G76490	Encodes a 3-hydroxy-3-methylglutaryl coenzyme A reductase, which is involved in melavonate biosynthesis and performs the first committed step in isoprenoid biosynthesis. Expression is activated in dark in leaf tissue but not controlled by light in the root (confine The mRNA is cell-to-cell mobile.	AtHMGR1,HMG1,HMGR1,MAD3	0.64886845637725	1.45758516113592e-18
AT1G76500	Encodes an AT hook domain containing protein. Identified in a screen of activation tagged lines that suppress the long-hypocotyl phenotype of a weak phyB allele. Affects cell elongation in the hypocotyl and leaves.Acts redundantly with ESC to modulate hypocotyl growth inhibition in response to light	AHL29,SOB3	0.497566911980529	0.000354313414477372
AT1G76510	ARID/BRIGHT DNA-binding domain-containing protein;(source:Araport11)	ARID4	0.581436750983794	2.95205587575056e-05
AT1G76580	Squamosa promoter-binding protein-like (SBP domain) transcription factor family protein;(source:Araport11)	NA	0.328418366566295	0.00405676791454709
AT1G76590	PLATZ transcription factor family protein;(source:Araport11)	NA	0.941367328810287	2.01135629681141e-08
AT1G76700	DNAJ heat shock N-terminal domain-containing protein;(source:Araport11)	NA	0.430104752886762	0.0385308361110024
AT1G76710	SET domain group 26;(source:Araport11)	ASHH1,SDG26	1.03754272046451	1.39312038870914e-05
AT1G76790	Encodes a protein with similarity to N-acetylserotonin O-methyltransferase (ASMT) but it does not have ASMT activity in vitro.	IGMT5	0.698501478843347	5.14603572999209e-06
AT1G76810	eukaryotic translation initiation factor 2 (eIF-2) family protein;(source:Araport11)	eIF5B1	0.608612849283463	1.94523764966857e-14
AT1G76820	eukaryotic translation initiation factor 2 (eIF-2) family protein;(source:Araport11)	NA	0.945286610209018	0.00562274396394648
AT1G76860	Small nuclear ribonucleoprotein family protein;(source:Araport11)	LSM3B	0.866162144884835	0.000101503860641562
AT1G76930	Encodes an Arabidopsis extensin gene that belongs to cell-wall hydroxyproline-rich glycoproteins. The cross-link of extensins enforces cell wall strength. Transgenic plants overexpressing this gene show an increase in stem thickness.	ATEXT1,ATEXT4,EXT1,EXT4,ORG5	0.581485142460844	0.00606564670858869
AT1G76970	Encodes a member of the Arabidopsis TOL (TOM1-LIKE) family of ubiquitin binding proteins that acts redundantly in the recognition and further endocytic sorting of a PIN-FORMED (PIN)-type auxin carrier protein at the plasma membrane, modulating dynamic auxin distribution and associated growth responses.	NA	0.568223608509354	3.95635110721362e-05
AT1G77020	DNAJ heat shock N-terminal domain-containing protein;(source:Araport11)	NA	0.639619673948317	0.000501491768637976
AT1G77080	MADS domain protein - flowering regulator that is closely related to FLC. Deletion of this locus in Nd ecotype is correlated with earlier flowering in short days suggesting function as a negative regulator of flowering.	AGL27,FLM,MAF1	0.50523455495811	0.000230372780374084
AT1G77120	Catalyzes the reduction of acetaldehyde using NADH as reductant. Requires zinc for activity. Dimer. Anaerobic response polypeptide (ANP). Fermentation. The protein undergoes thiolation following treatment with the oxidant tert-butylhydroperoxide. The mRNA is cell-to-cell mobile.	ADH,ADH1,ATADH,ATADH1	2.5562644965757	4.20701382681794e-40
AT1G77145	transmembrane protein, putative (DUF506);(source:Araport11)	NA	1.73908206412516	0.00254611873717105
AT1G77180	Encodes a putative transcriptional factor. Shows transcriptional activator activity in yeast. Involved in response to abscisic acid, salt and osmotic stress. SKIP lengthens period of the circadian clock by impairing the alternative splicing of PRR7 and PRR9. SKIP regulates the splicing of SEF pre-mRNA and suppresses flowering by activation of FLC.	SKIP	1.17890205724364	9.82880897901093e-48
AT1G77200	encodes a member of the DREB subfamily A-4 of ERF/AP2 transcription factor family. The protein contains one AP2 domain. There are 17 members in this subfamily including TINY.	NA	1.7170638374064	1.40717509082205e-08
AT1G77210	AtSTP14 belongs to the family of sugar transport proteins (AtSTPs)in volved in monosaccharide transport. Heterologous expression in yeast revealed that AtSTP14 is the transporter specifc for galactose and does not transport other monosaccharides such as glucose or fructose.	AtSTP14,STP14	1.10474858184464	8.90241325632043e-10
AT1G77220	LAZ1H1 is a DUF300 that is localized to the tonoplast. Along with LAZ1 it appears to play a role in maintaining the structural integrity of vacuoles and regulating BR signaling by modulating downstream subcellular distribution of BAK1.	LAZ1H1	0.690308887533038	2.01415242506033e-08
AT1G77230	Tetratricopeptide repeat (TPR)-like superfamily protein;(source:Araport11)	NA	0.332060508539438	0.00612477736104433
AT1G77250	RING/FYVE/PHD-type zinc finger family protein;(source:Araport11)	NA	0.886783876111461	4.10036001188468e-07
AT1G77270	hypothetical protein;(source:Araport11)	NA	2.30395545378889	1.12986595101125e-09
AT1G77290	Glutathione S-transferase family protein;(source:Araport11)	NA	0.476161249972739	0.0239714164738585
AT1G77320	Mutant is defective in meiosis and produces abnormal microspores. Encodes a BRCT-domain-containing protein that could be specific to the meiotic cell cycle and that plays a crucial role in some DNA repair events independent of SPO11 DSB recombination repair.	MEI1	0.401602309694829	0.00751232362428178
AT1G77330	similar to 1-aminocyclopropane-1-carboxylate oxidase GI:3386565 from (Sorghum bicolor)	ACO5	1.57321837740738	3.10041349208159e-32
AT1G77380	Amino acid permease which transports basic amino acids.	AAP3,ATAAP3	1.694985333495	1.16377883444841e-34
AT1G77450	NAC domain transcriptional regulator that is induced by ROS in roots where it regulates the expression of downstream genes such as MYB30.	anac032,NAC032	0.767602557349885	1.83437006270005e-08
AT1G77500	DUF630 family protein, putative (DUF630 and DUF632);(source:Araport11)	NA	0.948126464181377	6.75751816943615e-19
AT1G77640	encodes a member of the DREB subfamily A-5 of ERF/AP2 transcription factor family. The protein contains one AP2 domain. There are 15 members in this subfamily including RAP2.1, RAP2.9 and RAP2.10.	NA	1.90195845764979	0.00022942721956857
AT1G77680	Ribonuclease II/R family protein;(source:Araport11)	AtRRP44B,RRP44B,SOV	0.789656056005872	3.10671701660812e-22
AT1G77690	Encodes an auxin influx carrier LAX3 (Like Aux1) that promotes lateral root emergence. Auxin-induced expression of LAX3 in turn induces a selection of cell-wall-remodelling enzymes, which are likely to promote cell separation in advance of developing lateral root primordia.	LAX3	0.905362806213644	7.83845073893276e-18
AT1G77700	Osmotin-like protein.	NA	0.701951945069761	0.0110588606773331
AT1G77740	Encodes PIP5K2, a phosphatidylinositol-4-phosphate 5-kinase (PtdIns(4)P 5-kinase 2; or PIP5K2 that is involved in regulating lateral root formation and root gravity response. The mRNA is cell-to-cell mobile.	PIP5K2	0.261004061528298	0.015176895330054
AT1G77760	Encodes the cytosolic minor isoform of nitrate reductase (NR). Involved in the first step of nitrate assimilation, it contributes about 15% of the nitrate reductase activity in shoots. Similar to molybdopterin oxidoreductases at the N-terminus, and to FAD/NAD-binding cytochrome reductases at the C-terminus. Cofactors: FAD, heme iron (cytochrome B-557), and molybdenum-pterin.	GNR1,NIA1,NR1	0.867523201982928	2.57201245658795e-21
AT1G77810	Galactosyltransferase family protein;(source:Araport11)	NA	0.430735254292769	0.0211632592307237
AT1G77870	membrane-anchored ubiquitin-fold protein 5 precursor;(source:Araport11)	MUB5	2.69622066653243	0.000803145530916892
AT1G77880	Galactose oxidase/kelch repeat superfamily protein;(source:Araport11)	NA	2.8195143797004	0.01615887710087
AT1G78010	tRNA modification GTPase;(source:Araport11)	TrmE	0.795977661031235	6.66906816935987e-11
AT1G78040	Pollen Ole e 1 allergen and extensin family protein;(source:Araport11)	NA	0.763603941372073	1.80072327007279e-20
AT1G78080	Encodes a member of the DREB subfamily A-6 of ERF/AP2 transcription factor family (RAP2.4). The protein contains one AP2 domain. Role in mediating light and ethylene signaling. The mRNA is cell-to-cell mobile.	AtWIND1,RAP2.4,WIND1	0.267004792663697	0.000807606697431418
AT1G78130	Major facilitator superfamily protein;(source:Araport11)	UNE2	1.35929794731691	4.68733518317295e-14
AT1G78150	N-lysine methyltransferase;(source:Araport11)	NA	1.50463528125706	5.18920497602375e-41
AT1G78240	Encodes TSD2 (TUMOROUS SHOOT DEVELOPMENT2), a putative methyltransferase with an essential role in cell adhesion, anthocyanin accumulation, and coordinated plant development.	OSU1,QUA2,TSD2	0.479594265852128	6.16277484635597e-11
AT1G78260	RNA-binding (RRM/RBD/RNP motifs) family protein;(source:Araport11)	NA	1.54765113731546	9.16324339078237e-19
AT1G78265	Natural antisense transcript overlaps with AT1G78270;(source:Araport11)	NA	0.790351460728743	6.88012249967253e-09
AT1G78270	UDP-glucosyl transferase 85A4;(source:Araport11)	AtUGT85A4,UGT85A4	1.76686100130919	9.41130178017836e-15
AT1G78340	Encodes glutathione transferase belonging to the tau class of GSTs. Naming convention according to Wagner et al. (2002).	ATGSTU22,GSTU22	1.08252415769855	7.09990942223861e-05
AT1G78390	Encodes 9-cis-epoxycarotenoid dioxygenase, a key enzyme in the biosynthesis of abscisic acid. The expression of this gene increases during the first 6h of imbibition.	ATNCED9,NCED9	2.54751422491964	6.83160375047249e-05
AT1G78550	2-oxoglutarate (2OG) and Fe(II)-dependent oxygenase superfamily protein;(source:Araport11)	NA	0.652971417265826	0.00176914682752409
AT1G78660	The Arabidopsis protein AtGGH1 is a gamma-glutamyl hydrolase cleaving pentaglutamates to yield di- and triglutamates. The enzyme is involved in the tetrahydrofolate metabolism and located to the vacuole.	ATGGH1,GGH1	0.645222564105588	4.55054574939688e-17
AT1G78700	BES1/BZR1 homolog 4;(source:Araport11)	BEH4	0.434075711333458	0.00013810189990705
AT1G78750	F-box/RNI-like superfamily protein;(source:Araport11)	NA	1.30433342452808	0.00020181513613818
AT1G78860	curculin-like (mannose-binding) lectin family protein, low similarity to Ser/Thr protein kinase (Zea mays) GI:2598067; contains Pfam profile PF01453: Lectin (probable mannose binding) but not the protein kinase domain of the Z. mays protein	GAL2	1.80903449851916	2.74619272172519e-14
AT1G78880	Plasma membrane-localized proteins that negatively regulate cellulose synthesis by inhibiting the exocytosis of CESAs.	SHOU4	0.403567972064342	3.64388606445467e-07
AT1G78910	Pseudouridine synthase family protein;(source:Araport11)	NA	0.887950867840675	0.00234377250320151
AT1G78920	Encodes a type II H+-PPases that localizes to and function as a proton pump of the Golgi apparatus in most tissues except for mature leaves.	AtVHP21,AVP2,AVPL1,VHP21,VP2	0.502153316978714	1.72913829614344e-11
AT1G78960	Encodes a multifunctional 2-3-oxidosqualene (OS)-triterpene cyclase that can cyclize OS into lupeol, alpha- and beta-amyrin.	ATLUP2,LUP2	0.775097008578444	9.78844968722325e-08
AT1G78970	Lupeol synthase. Converts oxidosqualene to multiple triterpene alcohols and a triterpene diols. This conversion proceeds through the formation of a 17&	ATLUP1,LUP1	0.757680156146001	1.08581926145831e-08
AT1G79000	Homologous to CREB-binding protein, a co-activator of transcription with histone acetyl-transferase activity. No single prior lysine acetylation is sufficient to block HAC1 acetylation of the H3 or H4 peptides, suggesting that HAC1, HAC5, and HAC12 can acetylate any of several lysines present in the peptides. HAM2 acetylates histone H4 lysine 5. A plant line expressing an RNAi construct targeted …	ATHAC1,ATHPCAT2,HAC1,PCAT2	0.214881384089917	0.0023666727964631
AT1G79160	filamentous hemagglutinin transporter;(source:Araport11)	NA	0.299560493332077	0.0351682475757361
AT1G79340	Encodes MCP2d, the predominant and constitutively expressed member of type II metacaspases (MCPs). MCP2d plays a positive regulatory role in biotic and abiotic stress-induced programmed cell death (PCD). Arabidopsis contains three type I MCP genes (MCP1a-c) and six type II MCP genes (MCP2a?f): AtMCP1a/At5g64240, AtMCP1b/At1g02170, AtMCP1c/At4g25110, AtMCP2a/At1g79310, AtMCP2b/At1g79330, AtMCP2c/A…	AtMC4,AtMCP2d,MC4,MCP2d	0.281213812776628	0.000654396176134071
AT1G79360	organic cation/carnitine transporter 2;(source:Araport11)	ATOCT2,OCT2,OCT2	1.94672496109521	4.05101609563428e-16
AT1G79380	Encodes a ubiquitin ligase that is an essential upstream modulator of JA signaling in response to various stimuli.	RGLG4	0.319737205406257	0.000694905609411446
AT1G79420	C-type mannose receptor (DUF620);(source:Araport11)	BDR2	0.564013173030071	0.0292216839570284
AT1G79440	Encodes a mitochondrial succinic semialdehyde dehydrogenase (SSADH). Nomenclature according to Kirch, et al (2004).	ALDH5F1,ENF1,SSADH,SSADH1	1.22776362908973	3.96650081767522e-23
AT1G79450	ALA-interacting subunit 5;(source:Araport11)	ALIS5	0.699429740029384	0.0117138288467318
AT1G79460	Encodes for a protein with ent-kaurene synthase B activity which catalyzes the second step in the cyclization of GGPP to ent-kaurene in the gibberellins biosynthetic pathway.	ATKS,ATKS1,GA2,KS,KS1	0.466290403448838	0.0498906827748915
AT1G79530	Encodes one of the chloroplast/plastid localized GAPDH isoforms (GAPCp1/At1g79530 and GAPCp2/At1g16300). gapcp double mutants display a drastic phenotype of arrested root development, dwarfism and sterility. GAPCps are important for the synthesis of serine in roots.	GAPCP-1	0.273505007491991	0.00474617661107411
AT1G79550	Encodes cytosolic phosphoglycerate kinase (PGK3). Expression studies in PGK mutants showed that PGK1 and PGK3 were down-regulated in pgk3.2 and pgk1.1, respectively. These results indicate that the down-regulation of photosynthetic activity could be a plant strategy when glycolysis is impaired to achieve metabolic adjustment and optimize growth.	PGK,PGK3	0.189478446793545	0.00661975882545804
AT1G79590	Encodes one of 24 Arabidopsis syntaxins. Its mRNA has been shown to be expressed.	ATSYP52,SYP52	0.994222153860707	6.54453297941584e-18
AT1G79620	VRLK1 is a LRR kinase involved in switching between cell elongation and secondary cell wall thickening.VRLK1 is a member of a gene family that includes a small number of recently duplicated paralogs.	VRLK1	0.65617287636297	1.89124945157182e-05
AT1G79700	WRI4 encodes an AP2/ERF-type transcriptional activator that specifically controls cuticular wax biosynthesis in Arabidopsis stems. It also functions to activate transcription of genes involved fatty acid biosynthesis during seed and flower development as well as stem wax biosynthesis. Targets identified by ChIP-seq include: LACS1, KCR1, PAS2, ECR, and WSD1.	WRI4	2.14496288919018	8.67622884375826e-45
AT1G79730	Encodes a PAF1 homolog that is involved in the control of flowering time by elevating FLC expression to a level that creates the vernalization-responsive, winter-annual habit. Yeast PAF1 is a component of a five-member complex that associates with RNA pol II and is thought to regulate gene expression by recruiting SET1 (a histone 3 Lys 4 [H3-K4] methyl transferase) to the initially transcribed [5…	ELF7	0.270592571059835	0.012352579316493
AT1G79740	hAT transposon superfamily;(source:Araport11)	NA	0.247086520116761	0.0177332356484441
AT1G79750	The malic enzyme (EC 1.1.1.40) encoded by AtNADP-ME4 is localized to chloroplasts. The gene is expressed throughout the whole plant and during embryogenesis and germination. A possible involvement in the fatty acid biosynthesis has been proposed.	ATNADP-ME4,NADP-ME4	0.557152291805692	2.33221446837456e-19
AT1G79820	Major facilitator superfamily protein;(source:Araport11)	SGB1	0.701130260886094	2.19620019626799e-06
AT1G79830	This gene is predicted to encode a protein that functions as a Golgi apparatus structural component known as a golgin in mammals and yeast. A fluorescently-tagged version of GC5 co-localizes with Golgi markers, and this localization appears to be replicated using the C-terminal (139 aa) portion of the protein. The C-terminal portion of the protein can also specifically interact with two members o…	GC5	1.02621233349649	4.39060831901945e-39
AT1G79880	RNA recognition motif (RRM)-containing protein;(source:Araport11)	AtLa2,La2	0.474213172712878	0.00388861431546836
AT1G79900	encodes a mitochondrial ornithine transporter that exports ornithine from the mitochondria to the cytosol	ATMBAC2,BAC2	1.74216809159331	1.86540268825044e-15
AT1G79930	encodes high molecular weight heat shock protein 70 not a HSP90 homolog, mRNA is constitutively expressed but transiently induced after heat shock	AtHsp70-14,HSP91	0.581032293699823	3.93461433570355e-16
AT1G79940	J domain protein localized in ER membrane. Mutants have defective pollen germination.	ATERDJ2A	0.306192869940969	0.000238991436428415
AT1G79990	coatomer subunit beta-2;(source:Araport11)	NA	0.850347380436812	7.63001438024802e-25
AT1G80160	Vicinal oxygen chelate (VOC) superfamily member.	GLYI7	0.545526970652675	0.00605642104492639
AT1G80210	Mov34/MPN/PAD-1 family protein;(source:Araport11)	AtBRCC36A,BRCC36A	0.658054991709825	1.17996645169836e-06
AT1G80240	DUF642 gene	DGR1	1.44942821143068	7.08118080547806e-18
AT1G80260	Spc97 / Spc98 family of spindle pole body (SBP) component;(source:Araport11)	emb1427	0.192194023530834	0.0331048998051779
AT1G80280	alpha/beta-Hydrolases superfamily protein;(source:Araport11)	NA	1.57095984024533	5.40012327833104e-42
AT1G80290	a member of the Glycosyltransferase Family 64 (according to CAZy Database)	NA	0.449431378348654	0.00382353131239714
AT1G80350	encodes a p60 katanin protein that is expressed throughout the plant. Required for the specification of cell fates from early in development (in the meristem) through differentiation and for normal postmitotic organization of cortical microtubules into transverse arrays in root epidermis cells. Mutants display cytoskeletal defects.	AAA1,ATKTN1,BOT1,ERH3,FRA2,FRC2,FRC4,FTR,KTN1,LUE1	0.309909332684728	0.00382149630769977
AT1G80360	Encodes a methionine-specific aminotransferase that uses the ethylene biosynthetic intermediate methionine as an amino donor and the auxin biosynthetic intermediate indole-3-pyruvic acid as an amino acceptor to produce L-tryptophan and 2-oxo-4-methylthiobutyric acid. These actions allow VAS1 to coordinate both auxin and ethylene biosynthesis. It functions downstream of TAA1/SAV3 but upstream of Y…	ISS1,VAS1	0.230079944737831	0.0443966091109249
AT1G80410	Encodes the catalytic subunit of a N-terminal acetyltransferase.	EMB2753,NAA15,OMA	0.169353394244027	0.0349380342993232
AT1G80420	Encodes a component of plant break excision repair and functions at several stages during active DNA demethylation in Arabidopsis.	ATXRCC1,XRCC1	0.985288504204261	2.64734174820674e-06
AT1G80440	Encodes a member of a family of F-box proteins, called the KISS ME DEADLY (KMD) family, that targets type-B ARR proteins for degradation and is involved in the negative regulation of the cytokinin response. Also named as KFB20, a member of a group of Kelch repeat F-box proteins that negatively regulate phenylpropanoid biosynthesis by targeting the phenypropanoid biosynthesis enzyme phenylalanine …	KFB20,KMD1	0.634689751050801	7.34890669891135e-11
AT1G80460	Encodes a protein similar to glycerol kinase, which converts glycerol to glycerol 3-phosphate and performs a rate-limiting step in glycerol metabolism. This gene is required for both general and specific resistance against bacteria and fungi. Arabidopsis thaliana glycerol kinase (GLR1) mRNA.Involved in flagellin-induced non-host resistance to Pseudomonas. Coronatine partially suppresses flagellin…	GLI1,NHO1	0.949181534657125	3.22149102322598e-22
AT1G80490	Encodes a protein with a Lissen-cephaly type-1-like homology (LisH) domain at the N terminus,a C-terminal to LisH (CTLH) domain, and 12 WD (tryptophan-aspartic acid)-40 repeats at the C terminus. It is closely related to Topless (TPL), which mediates auxin-dependent transcriptional repression during embryogenesis.	TPR1	0.54498500456219	5.44912618918083e-16
AT1G80520	Sterile alpha motif (SAM) domain-containing protein;(source:Araport11)	NA	1.40666765954887	6.82884084439302e-07
AT1G80550	Pentatricopeptide repeat (PPR) superfamily protein;(source:Araport11)	NA	0.568727090015725	0.00314330989862032
AT1G80570	RNI-like superfamily protein;(source:Araport11)	NA	1.41296613592128	2.26506845768051e-33
AT1G80670	This gene is predicted to encode a protein with a DWD motif. It can bind to DDB1a in Y2H assays, and may be involved in the formation of a CUL4-based E3 ubiquitin ligase	RAE1	0.213183844910682	0.0376227746823928
AT1G80790	Belongs to a subgroup of SGS3-like proteins that act redundantly in RNA-directed DNA methylation: AT1G15910 (FDM1), AT4G00380 (FDM2), AT3G12550 (FDM3), AT1G13790 (FDM4), AT1G80790 (FDM5). The mRNA is cell-to-cell mobile.	FDM5	0.28245321616188	0.0479748386464096
AT1G80830	Thought to be involved in iron homeostasis. Induced in leaves in response to iron deficiency. Transgenic plants accumulate toxic levels of iron. Gene complements yeast iron uptake mutants.	ATNRAMP1,NRAMP1,PMIT1	0.847172341836243	6.6637533777076e-18
AT1G80900	Transmembrane magnesium transporter. One of nine family members.	ATMGT1,MGT1,MRS2-10	0.867481321272446	4.10684395146833e-05
AT1G80920	A nuclear encoded soluble protein found in the chloroplast stroma. Negatively regulated by light and has rapid turnover in darkness.	AtJ8,AtToc12,DJC22,J8,Toc12	1.22412549078196	1.26885933692609e-27
AT1G80930	MIF4G domain-containing protein / MA3 domain-containing protein;(source:Araport11)	NA	0.213844522974296	0.0151352394086894
AT2G01080	Late embryogenesis abundant (LEA) hydroxyproline-rich glycoprotein family;(source:Araport11)	NA	1.3555656612661	1.41347513053472e-24
AT2G01090	Ubiquinol-cytochrome C reductase hinge protein;(source:Araport11)	NA	0.847731786301113	0.0340244920014639
AT2G01100	FAM133-like protein;(source:Araport11)	NA	1.05414720651312	2.85982231895356e-10
AT2G01130	DEA(D/H)-box RNA helicase family protein;(source:Araport11)	NA	0.522226828685762	3.71054421561128e-06
AT2G01150	Encodes a RING-H2 finger protein that is expressed in vascular tissue, root tips, embryos and pistils.	RHA2B	0.825236970223398	8.60699215831292e-07
AT2G01170	Encodes a bidirectional amino acid transporter that can transport ala, arg, glu and lys, GABA but not pro with both export and import activity. Its expression is localized in the vascular tissues suggesting a function in amino acids export from the phloem into sink tissue.	AtGABP,BAT1,GABP	0.307487082112771	0.00209253522825944
AT2G01190	Octicosapeptide/Phox/Bem1p family protein;(source:Araport11)	PDE331	0.454289532488221	5.29712070379055e-09
AT2G01200	Belongs to auxin inducible gene family.	IAA32,MEE10	3.6730022683819	1.20929032965619e-09
AT2G01220	Nucleotidylyl transferase superfamily protein;(source:Araport11)	NA	0.369818855857407	0.00227011556588902
AT2G01300	mediator of RNA polymerase II transcription subunit;(source:Araport11)	NA	1.54961051309853	0.00200418550585056
AT2G01320	ABC-2 type transporter family protein;(source:Araport11)	ABCG7	0.863212956288452	3.08880537682385e-17
AT2G01340	Encodes a protein whose expression is responsive to nematode infection; PADRE protein up-regulated after infection by S. sclerotiorun.	At17.1	1.23620527970937	0.00217898707454663
AT2G01400	hypothetical protein;(source:Araport11)	NA	1.05718145687788	0.00153053098666384
AT2G01420	Encodes a putative auxin efflux carrier that is localized in developing and mature root meristems. It is involved in the maintenance of embryonic auxin gradients. A role for AtPIN4 in generating a sink for auxin below the quiescent center of the root meristem that is essential for auxin distribution and patterning is proposed. In the root, PIN4 is detected around the quiescent center and cells su…	ATPIN4,PIN4	0.269780821006684	0.00406600101766954
AT2G01450	MPK17 Map kinase family member. Mutants have increased numbers of peroxisomes a phenotype that can be suppressed by mutations in PMD1. This and other treatments, suggests a function in control of peroxisome proliferation in salt stress.	ATMPK17,MPK17	2.72946902707283	4.00856221024395e-291
AT2G01460	P-loop containing nucleoside triphosphate hydrolases superfamily protein;(source:Araport11)	NA	0.462273981622905	2.04147970826463e-06
AT2G01470	Sec12p-like protein (GTP exchange protein) that functionally complements yeast sec12 null mutant. Protein is localized to the ER.	ATSEC12,STL2P	0.963584385300843	1.04777546710622e-13
AT2G01480	ESMD1 is a golgi localized putative O-fucosyltransferase.	ESMD1	0.205875921981568	0.0386748125859464
AT2G01570	Member of the VHIID/DELLA regulatory family. Contains homopolymeric serine and threonine residues, a putative nuclear localization signal, leucine heptad repeats, and an LXXLL motif. Putative transcriptional regulator repressing the gibberellin response and integration of phytohormone signalling. DELLAs repress cell proliferation and expansion that drives plant growth. The protein undergoes degra…	RGA,RGA1,RGA24	0.5829646063704	2.84402989940452e-14
AT2G01610	Plant invertase/pectin methylesterase inhibitor superfamily protein;(source:Araport11)	NA	0.933763494658382	0.000136666237566867
AT2G01650	encodes a peripheral membrane protein that contains UBX domain and interacts with AtCDC48 in vitro and co-fractionates with membrane-associated but not soluble AtCDC48 in vivo.	PUX2	0.372911996371608	0.00164240158201667
AT2G01680	Ankyrin repeat family protein;(source:Araport11)	NA	0.373084380178221	0.00919471233485799
AT2G01735	encodes a RING-H2 zinc finger protein essential for seed development.	RIE1	0.325802387905418	0.0498294050939588
AT2G01770	Encodes an iron transporter required for iron sequestration into vacuoles. Expressed in developing embryo and seed. Localized in the vacuolar membrane.	ATVIT1,VIT1	6.8344355749799	5.38011628760752e-07
AT2G01930	BASIC PENTACYSTEINE1 (BPC1) is a regulator of the homeotic Arabidopsis thaliana gene SEEDSTICK (STK), which controls ovule identity. BPC1 induces conformational changes by cooperative binding to purine-rich elements present in the STK regulatory sequence. STK is upregulated in bpc1 mutant.Along with BPC2, BPC1 binds to the promoter of and represses GALS1 thereby reducing beta 1,4- galactan accumu…	ATBPC1,BBR,BPC1	0.995158770358745	3.50959097178222e-16
AT2G01940	Encodes a transcription factor that, together with IDD14 and IDD16, regulates auxin biosynthesis and transport and thus aerial organ morphogenesis and gravitropic responses. May be involved in an early event in shoot gravitropism such as gravity perception and/or a signaling process subsequent to amyloplast sedimentation as a putative transcription factor in gravity-perceptive cells.	ATIDD15,IDD15,SGR5	0.500245037958633	0.00111263005273208
AT2G02050	NADH-ubiquinone oxidoreductase B18 subunit;(source:Araport11)	NA	0.822205285214848	1.31769494792268e-10
AT2G02060	Homeodomain-like superfamily protein;(source:Araport11)	NA	1.20586273998145	0.00186550537545219
AT2G02080	C2H2 BIRD transcription factor family.	AtIDD4,IDD4,IME	1.54377365623729	2.41396178703216e-41
AT2G02100	Predicted to encode a PR (pathogenesis-related) protein. Belongs to the plant defensin (PDF) family with the following members: At1g75830/PDF1.1, At5g44420/PDF1.2a, At2g26020/PDF1.2b, At5g44430/PDF1.2c, At2g26010/PDF1.3, At1g19610/PDF1.4, At1g55010/PDF1.5, At2g02120/PDF2.1, At2g02100/PDF2.2, At2g02130/PDF2.3, At1g61070/PDF2.4, At5g63660/PDF2.5, At2g02140/PDF2.6, At5g38330/PDF3.1 and At4g30070/PDF…	LCR69,PDF2.2	0.640668709180003	3.00163679029364e-13
AT2G02160	Non- tandem CCCH zinc finger protein.	AtC3H17,C3H17	1.22673509810683	2.25806131391555e-43
AT2G02170	Remorin family protein;(source:Araport11)	NA	1.92435515618895	1.45780491159163e-24
AT2G02220	Encodes a protein interacting with phytosulfokine, a five amino acid sulfated peptide (YIYTQ). Contains dual guanylate cyclase and kinase catalytic activities that operate in vivo.	ATPSKR1,PSKR1	0.560259783251519	2.62250536955768e-08
AT2G02230	phloem protein 2-B1;(source:Araport11)	AtPP2-B1,PP2-B1	0.8252518750126	0.00329827176156204
AT2G02360	Encodes an F-box protein containing a Nictaba-related lectin domain that can act as a carbohydrate-binding protein.Expression is induced by SA and pathogenic bacteria.	AtPP2-B10,PP2-B10	0.691634592089603	0.00103900916702949
AT2G02370	SNARE associated Golgi protein family;(source:Araport11)	NA	0.705171432182848	5.44841164593172e-07
AT2G02450	NAC domain containing protein 35;(source:Araport11)	ANAC034,ANAC035,AtLOV1,LOV1,NAC035	0.517572192148211	0.0344714370012794
AT2G02470	Encodes a member of the Alfin1-like family of nuclear-localized PHD (plant homeodomain) domain containing proteins that acts as a novel upstream regulator of root hair formation during Pi starvation. All AL proteins except AL3 bind to di- or trimethylated histone H3 (H3K4me3/2). Members of this family include: AT5G05610 (AL1), AT3G11200 (AL2), AT3G42790 (AL3), AT5G26210 (AL4), AT5G20510 (AL5), AT…	AL6	0.39047327685533	0.0452806306633541
AT2G02560	Arabidopsis thaliana homolog of human CAND1 (cullin-associated and neddylation-dissociated). Putative similarity to TBP-interacting protein TIP120. Ubiquitously expressed in plant tissues throughout development. T-DNA insertion mutant plants were completely sterile and resistant to sirtinol and auxin, but not to gibberellins or brassinolide. Displayed developmental phenotypes similar to those of …	ATCAND1,CAND1,ETA2,HVE,TIP120	0.178024269657636	0.0188430009319092
AT2G02570	Similar to SPF30 splicing factor. Under circadian control. Mutants have defects in alternative splicing and show more intron retention compared to wt.	NA	2.01286431530075	2.35280301349792e-36
AT2G02610	Cysteine/Histidine-rich C1 domain family protein;(source:Araport11)	NA	0.66548147510779	0.0096362158521386
AT2G02630	Cysteine/Histidine-rich C1 domain family protein;(source:Araport11)	NA	1.57608824008542	1.55908302219476e-06
AT2G02640	Cysteine/Histidine-rich C1 domain family protein;(source:Araport11)	NA	4.51846451680896	0.00802766152394293
AT2G02680	Cysteine/Histidine-rich C1 domain family protein;(source:Araport11)	NA	0.593097926275541	4.52453607108058e-05
AT2G02700	Cysteine/Histidine-rich C1 domain family protein;(source:Araport11)	NA	3.02344688035698	0.000166008051935503
AT2G02710	Encodes a putative blue light receptor protein.	PLP,PLPA,PLPB,PLPC	0.826437045554704	3.9221671657005e-16
AT2G02730	GRIP/coiled-coil protein, putative (DUF1664);(source:Araport11)	NA	0.857037210057515	0.00236097586632303
AT2G02790	Encodes a microtubule-associated protein.Member of IQ67 (CaM binding) domain containing family.	IQD29	0.306470115629751	0.0206555743610712
AT2G02870	Galactose oxidase/kelch repeat superfamily protein;(source:Araport11)	NA	0.438139002207265	1.77987648924181e-05
AT2G02930	Encodes glutathione transferase belonging to the phi class of GSTs. Naming convention according to Wagner et al. (2002).	ATGSTF3,GST16,GSTF3	2.20735379800286	2.76679171140914e-10
AT2G02950	Encodes a basic soluble protein which can independently bind to either PHYA or PHYB, regardless of whether the phytochromes are in the Pr or Pfr state. PKS1 can be phosphorylated by oat phyA in vitro in a light regulated manner. It is postulated to be a negative regulator of phyB signalling.	PKS1	1.00148267769448	4.00038632382111e-07
AT2G02960	RING/FYVE/PHD zinc finger superfamily protein;(source:Araport11)	NA	0.520079528810485	1.1163728449506e-08
AT2G02970	Encodes a putative apyrase involved in pollen exine pattern formation and anther dehiscence.	APY6,AtAPY6	0.291666197751988	0.000552228929511055
AT2G02990	Encodes a member of the ribonuclease T2 family that responds to inorganic phosphate starvation, and inhibits production of anthocyanin. Also involved in wound-induced signaling independent of jasmonic acid. Its expression is responsive to both phosphate (Pi) and phosphite (Phi) in roots.	ATRNS1,RNS1	0.812217328301817	0.00122567689989771
AT2G03150	Encodes a nuclear-localized calcium-binding protein RSA1 (SHORT ROOT IN SALT MEDIUM 1), which is required for salt tolerance.	emb1579,RSA1	0.302211327600884	0.00496736025558555
AT2G03330	transmembrane protein;(source:Araport11)	NA	0.765009177160889	0.000132648204533419
AT2G03470	ELM2 domain-containing protein;(source:Araport11)	NA	1.02841417671033	1.97056908419614e-09
AT2G03510	SPFH/Band 7/PHB domain-containing membrane-associated protein family;(source:Araport11)	NA	0.271308625889862	0.0471746716583897
AT2G03590	Encodes a member of a class of allantoin transporters.	ATUPS1,UPS1	1.68123957343766	8.1844865449891e-10
AT2G03620	Transmembrane magnesium transporter. One of nine family members.	AtMGT3,AtMRS2-5,MGT3,MRS2-5	0.570979519891559	0.00147242842626857
AT2G03680	The SPR1 gene encodes a plant-specific 12-kD protein which has a repeated motif at both ends, separated by a predicted rod-like domain, suggesting that it may act as an intermolecular linker. Ubiquitously expressed and belongs to a six-member gene family in Arabidopsis; expressed in transgenic seedlings localized to microtubules within the cortical array, preprophase band, phragmoplast, and mitot…	SKU6,SPR1	0.261826075030676	0.0170102231175639
AT2G03690	Ubiquinone biosynthesis protein COQ4 homolog.	NA	0.659121136072042	0.000308542085716967
AT2G03870	Small nuclear ribonucleoprotein family protein;(source:Araport11)	EMB2816,LSM7	0.564723679717248	0.00127011354522201
AT2G03890	Phosphoinositide kinase which undergo autophosphorylation and phosphorylate serine/threonine residues of protein substrates. Contains phosphoinositide 3/4-kinase and ubiquitin-like domains. The mRNA is cell-to-cell mobile.	ATPI4K_GAMMA_7,PI4K_GAMMA_7,UBDK_GAMMA_7	1.00191407870874	3.63199158542827e-40
AT2G03980	GDSL-motif esterase/acyltransferase/lipase. Enzyme group with broad substrate specificity that may catalyze acyltransfer or hydrolase reactions with lipid and non-lipid substrates.	NA	0.632959937494094	0.000311851763709295
AT2G04038	basic leucine-zipper 48;(source:Araport11)	AtbZIP48,bZIP48	4.28900942531574	1.59511812309798e-05
AT2G04240	Encodes a small protein with an N-terminal trans-membrane domain and a RING-H2 zinc finger motif located at the C-terminus. Gene expression is induced by salt and osmotic stress. Transcrips levels are induced by DELLA proteins and repressed by gibberellic acid. Involved in ABA metabolism.	XERICO	0.78742946185435	3.02667707698186e-09
AT2G04270	Similar to E.coli endoribonuclease E. Functions as a ribonuclease, is located in the chloroplast, and is involved in chloroplast development. Loss of function mutants are white and arrest at the cotyledon stage. The phenotype is rescued by providing sucrose.	RNE,RNEE/G	0.375744476267496	0.00127078815645378
AT2G04305	Magnesium transporter CorA-like family protein;(source:Araport11)	NA	0.469956587147806	0.000691114219946661
AT2G04430	nudix hydrolase homolog 5;(source:Araport11)	atnudt5,NUDT5	0.619217852389367	0.0341265485353071
AT2G04500	Cysteine/Histidine-rich C1 domain family protein;(source:Araport11)	NA	2.8236909717918	3.45757282860804e-12
AT2G04520	Nucleic acid-binding, OB-fold-like protein;(source:Araport11)	NA	0.426772347806994	0.00598349059113198
AT2G04540	Encodes a mitochondrial beta-ketoacyl-ACP synthase.	mtKAS	0.76409371189887	6.55506629335916e-09
AT2G04570	GDSL-motif esterase/acyltransferase/lipase. Enzyme group with broad substrate specificity that may catalyze acyltransfer or hydrolase reactions with lipid and non-lipid substrates. The mRNA is cell-to-cell mobile.	NA	1.17553161385197	1.4752414080559e-17
AT2G04690	Pyridoxamine 5-phosphate oxidase family protein;(source:Araport11)	NA	1.24088682551601	7.51547563195276e-30
AT2G04865	Encodes a nuclear localized aminotransferase-like protein containing a plant mobile domain. The mRNA is cell-to-cell mobile.	MAIL2	0.926550920284318	2.15339398179546e-12
AT2G04890	Encodes a scarecrow-like protein (SCL21). Member of GRAS gene family.	SCL21	0.83204896461808	1.46766688257262e-08
AT2G04900	hypothetical protein;(source:Araport11)	NA	0.504121950247021	0.000133586289776486
AT2G04940	scramblase-like protein;(source:Araport11)	NA	0.4391864611036	0.000228817646674219
AT2G05180	member of CYP705A	CYP705A6	0.822011203208631	0.00139204135183878
AT2G05185	hypothetical protein;(source:Araport11)	NA	0.929083727115529	0.00237992091029385
AT2G05330	BTB/POZ domain-containing protein;(source:Araport11)	NA	4.04823611229096	0.0203300881398777
AT2G05380	glycine-rich protein 3 short isoform (GRP3S) mRNA, complete The mRNA is cell-to-cell mobile.	GRP3S	2.72210680333377	2.18795446090224e-72
AT2G05400	Ubiquitin-specific protease family C19-related protein;(source:Araport11)	NA	2.1667312966424	4.06180008019718e-10
AT2G05510	Glycine-rich protein family;(source:Araport11)	NA	0.820517140964279	0.000641840505853744
AT2G05830	Encodes a 5-methylthioribose-1-phosphate isomerase.	MTI1,MTI1	0.289067897583581	0.00710186842994199
AT2G06010	encodes a novel protein whose expression level is induced in lines overexpressing salicylic-acid (SA)-inducible Arabidopsis DNA binding with one finger (Dof) transcription factor, called OBF-binding protein 3.	ORG4	0.457050783175732	0.00217886446187773
AT2G06050	Encodes a 12-oxophytodienoate reductase that is required for jasmonate biosynthesis. Mutants are male sterile and defective in pollen dehiscence. Shows activity towards 2,4,6-trinitrotoluene. CFA-Ile, CFA-Leu, CFA-Val, CFA-Met and CFA-Ala can restore the fertility of opr3 plants by inducing filament elongation and anther dehiscence.	AtOPR3,DDE1,OPR3	1.15720939068473	3.74577496781777e-14
AT2G06200	Growth regulating factor encoding transcription activator. One of the nine members of a GRF gene family, containing nuclear targeting domain. Involved in leaf development and expressed in root, shoot and flower	AtGRF6,GRF6	1.29342279966065	0.00166939553316508
AT2G06510	Encodes a homolog of Replication Protein A that is involved in meiosis I in pollen mother cells. rpa1a mutants have a reduced number of class I crossovers. The protein is located in chromatin-associated foci in early leptotene and can be detected in these foci until late pachytene of meiosis I.	ATRPA1A,ATRPA70A,RPA1A,RPA70A	0.462544968378904	0.012450976974431
AT2G06530	SNF7 family protein;(source:Araport11)	VPS2.1	0.49646120392614	0.00354242499466002
AT2G06850	endoxyloglucan transferase (EXGT-A1) gene	EXGT-A1,EXT,XTH4	0.875866638575103	5.58887362630462e-11
AT2G06990	Encodes a putative DExH-box RNA helicase that acts redundantly with HEN1, HUA1, and HUA2 in the specification of floral organ identity in the third whorl.	HEN2,SOP3	0.317541353223669	0.00104855711616752
AT2G07180	Protein kinase superfamily protein;(source:Araport11)	NA	2.1205734464014	2.66368313873817e-43
AT2G07671	ATP synthase subunit C family protein;(source:Araport11)	NA	0.224939918399173	9.88302739372575e-05
AT2G07675	Ribosomal protein S12/S23 family protein;(source:Araport11)	NA	0.398983906491133	0.00174597267187893
AT2G07676	hypothetical protein;(source:Araport11)	NA	0.681830785507944	0.0109327296136893
AT2G07687	Cytochrome c oxidase, subunit III;(source:Araport11)	NA	0.52592752640578	3.41078796171359e-08
AT2G07695	Cytochrome C oxidase subunit II-like, transmembrane domain-containing protein;(source:Araport11)	NA	0.211923919535886	0.0261231292988046
AT2G07698	ATPase, F1 complex, alpha subunit protein;(source:Araport11)	NA	1.26457086488853	1.44556166745795e-54
AT2G07707	Plant mitochondrial ATPase, F0 complex, subunit 8 protein;(source:Araport11)	NA	1.30309516260113	4.24691959153164e-43
AT2G07708	hypothetical protein;(source:Araport11)	NA	0.742807936821312	7.54435946780469e-14
AT2G07725	Ribosomal L5P family protein;(source:Araport11)	NA	0.603593052884813	2.25470459497474e-13
AT2G07727	cytochrome b;(source:Araport11)	NA	0.272367440270288	0.000169866683491955
AT2G07732	Ribulose bisphosphate carboxylase large chain, catalytic domain-containing protein;(source:Araport11)	NA	0.505628266255795	0.000316658641767156
AT2G07741	ATPase, F0 complex, subunit A protein;(source:Araport11)	NA	15.1744819928095	2.20250411825301e-32
AT2G07771	Cytochrome C assembly protein;(source:Araport11)	ABCI5	0.836759804624655	3.14819603795289e-14
AT2G07773	cytochrome B/B6 protein;(source:Araport11)	NA	1.03338205606307	7.33090995049653e-30
AT2G09090	Natural antisense transcript overlaps with AT2G39930;(source:Araport11)	NA	1.2895335195861	0.0145464083831997
AT2G10931	hypothetical protein;(source:Araport11)	NA	0.889994604189162	0.00886793147553374
AT2G11225	hypothetical protein;(source:Araport11)	NA	1.19068361592045	3.31819054014756e-14
AT2G11810	MGD3 is the major enzyme for galactolipid metabolism during phosphate starvation. Does not contribute to galactolipid synthesis under P1-sufficient conditions.	ATMGD3,MGD3,MGDC	1.65927944576102	0.0158393701463017
AT2G12170	hypothetical protein;(source:Araport11)	NA	4.43601251570433	0.0105054077329065
AT2G12462	sterile alpha motif (SAM) domain protein;(source:Araport11)	NA	1.39138442189433	6.69738667356454e-08
AT2G12550	ubiquitin-associated (UBA)/TS-N domain-containing protein;(source:Araport11)	NUB1	0.653587074691287	0.00281241845067121
AT2G13370	Chromatin-remodeling factor; has large number of MAPK docking sites (D-sites).	CHR5	0.229037151970458	0.0127925491314763
AT2G13540	Encodes a nuclear cap-binding protein that forms a heterodimeric complex with CBP20 and is involved in ABA signaling and flowering. Mutants are early flowering and exhibit hypersensitive response to ABA in germination inhibition.Loss of ABH1 function results in abnormal processing of mRNAs for several important floral regulators (FLC, CO, FLM). Analysis of loss of function mutations suggests a ro…	ABH1,ATCBP80,CBP80,ENS	0.226995934899285	0.0192155801780453
AT2G13547	hypothetical protein;(source:Araport11)	NA	3.09880180416747	0.00190098453232978
AT2G13665	Natural antisense transcript overlaps with AT2G13660;(source:Araport11)	NA	1.67239231288344	9.6925921300396e-11
AT2G13840	Polymerase/histidinol phosphatase-like protein;(source:Araport11)	NA	1.25744919800917	4.04979748684997e-07
AT2G14060	encodes a protein whose sequence is similar to SAM:salicylic acid carboxyl methyltransferase (SAMT) (GI:6002712)(Clarkia breweri) and to SAM:benzoic acid carboxyl methyltransferase (BAMT)(GI:9789277)(Antirrhinum majus)	NA	1.38779114380079	1.74761927762652e-06
AT2G14100	a member of the cytochrome P450 family	CYP705A13	0.37986512709302	0.0485577668904307
AT2G14120	Encodes a dynamin related protein. DRPs are self-assembling GTPasse involved in fission and fusion of membranes. DRP3B functions in mitochondrion and peroxisome fission in combination with DRP3A.	DRP3B	0.3721318861508	0.000190969903802079
AT2G14170	Arabidopsis thaliana methylmalonate-semialdehyde dehydrogenase	ALDH6B2	1.2875763184215	1.59710275980302e-59
AT2G14210	MADS box gene, transcription factor	AGL44,ANR1,AtANR1	2.00788464863027	1.03528081109657e-13
AT2G14247	Expressed protein;(source:Araport11)	NA	1.84345646581636	0.00057323417579261
AT2G14260	encodes proline iminopeptidase	PIP	0.695649812264423	4.9713930443702e-07
AT2G14680	myosin heavy chain-like protein;(source:Araport11)	MEE13	0.532088502452998	0.00279864900476009
AT2G14720	encodes a vacuolar sorting receptor	BP80-21,MTV4,VSR21,VSR4	0.5698519007772	4.83029049466449e-11
AT2G14740	Encodes a vacuolar sorting receptor that participates in vacuolar sorting in vegetative tissues and in seeds. The mRNA is cell-to-cell mobile.	ATVSR3,BP80-22,UXS2,VSR22,VSR3,VSR3	0.296409346064555	0.0168516504238779
AT2G14820	A member of the NPY gene family (NPY1/AT4G31820, NPY2/AT2G14820, NPY3/AT5G67440, NPY4/AT2G23050, NPY5/AT4G37590). Involved in auxin-mediated organogenesis.	MEL3,NPY2	0.869121698911028	0.0131955306207605
AT2G14835	RING/U-box superfamily protein;(source:Araport11)	NA	0.33370778956658	0.00101601334601285
AT2G14878	other_RNA;(source:Araport11)	NA	1.22852451158491	1.46515983128724e-53
AT2G14890	putative proline-rich protein (At2g14890) mRNA, complete The mRNA is cell-to-cell mobile.	AGP9	0.566168762770947	6.6850182024667e-06
AT2G14900	Gibberellin-regulated family protein;(source:Araport11)	NA	3.25218637258753	3.2316910528732e-17
AT2G14960	encodes a protein similar to IAA-amido synthases. Lines carrying an insertion in this gene are hypersensitive to auxin.	GH3.1	1.83409976525633	1.37758216524967e-09
AT2G15090	Encodes KCS8, a member of the 3-ketoacyl-CoA synthase family involved in the biosynthesis of VLCFA (very long chain fatty acids). The mRNA is cell-to-cell mobile.	KCS8	0.671291520659179	6.62115274525679e-08
AT2G15270	PRKR-interacting protein;(source:Araport11)	NA	1.71050849144749	9.52752634890491e-05
AT2G15292	other_RNA;(source:Araport11)	NA	0.416680436574311	0.00159812779684695
AT2G15300	Leucine-rich repeat protein kinase family protein;(source:Araport11)	NA	0.773893172888463	0.00312013529333603
AT2G15490	UDP-glycosyltransferase 73B4;(source:Araport11)	UGT73B4	0.735325283337582	0.00183666228600827
AT2G15560	Putative endonuclease	NA	0.337061270243642	0.00493980220698818
AT2G15680	Encodes a calmodulin-like protein.	AtCML30,CML30	1.8711101906026	0.00230006592160983
AT2G15830	hypothetical protein;(source:Araport11)	NA	2.04796805424617	1.55222849312537e-25
AT2G15880	Pollen expressed protein required for pollen tube growth.Along with other members of the LRX family, itnteracts with RALF4 to control pollen tube growth and integrity. Loss of function results in premature pollen tube rupture and reduced fertility.	LRX10	2.5926521414249	3.08524382934979e-110
AT2G15890	Encodes CBP1, a regulator of transcription initiation in central cell-mediated pollen tube guidance.	CBP1,MEE14	1.93006223425283	5.14295858671299e-40
AT2G15910	CSL zinc finger domain-containing protein;(source:Araport11)	NA	0.512811637902247	0.00795196261696771
AT2G16050	Cysteine/Histidine-rich C1 domain family protein;(source:Araport11)	NA	0.747904302942351	0.0198555057663285
AT2G16060	Encodes a class 1 nonsymbiotic hemoglobin induced by low oxygen levels with very high oxygen affinity. It is not likely to be a hemoglobin transporter because of its extremely high affinity for oxygen. Overexpression impairs cold stress-induced nitric oxide (NO) production.	AHB1,ARATH_GLB1,ATGLB1,GLB1,HB1,NSHB1,Pgb1	3.26137223231495	4.69399848938344e-21
AT2G16230	O-Glycosyl hydrolases family 17 protein;(source:Araport11)	NA	0.945861754691579	0.00541752819642087
AT2G16390	Putative chromatin remodeling protein, member of a plant-specific subfamily of SWI2/SNF2-like proteins. Mutations nearly eliminate non-CpG methylation at a target promoter but do not affect rDNA or centromere methylation. Cooperates with PolIVb to facilitate RNA-directed de novo methylation and silencing of homologous DNA. Endogenous targets include intergenic regions near retrotransposon LTRs or…	CHR35,DMS1,DRD1	0.663853455919299	1.60128773917594e-05
AT2G16405	Transducin/WD40 repeat-like superfamily protein;(source:Araport11)	NA	0.394296824213381	0.00112497191654788
AT2G16580	SAUR-like auxin-responsive protein family;(source:Araport11)	SAUR8	1.75658019527144	0.0120907826309792
AT2G16595	Translocon-associated protein (TRAP), alpha subunit;(source:Araport11)	NA	0.483948046007397	0.0401272576259865
AT2G16600	Encodes cytosolic cyclophilin ROC3. The mRNA is cell-to-cell mobile.	AtCYP19-1,CYP19,ROC3	1.16676977195826	1.52108904974101e-24
AT2G16710	Iron-sulfur cluster biosynthesis family protein;(source:Araport11)	NA	0.668331534475993	0.00336985247295098
AT2G16720	Encodes a member of MYB3R- and R2R3- type MYB- encoding gene family that acts as a repressor of flavonol biosynthesis. AtMYB7 gene expression is induced by salt treatment.	ATMYB7,ATY49,MYB7	0.882206779296483	2.5516894780561e-06
AT2G16740	ubiquitin-conjugating enzyme 29;(source:Araport11)	UBC29	0.488623152397588	0.000968421557276162
AT2G16750	kinase with adenine nucleotide alpha hydrolases-like domain-containing protein;(source:Araport11)	NA	0.305822730929921	0.0202822433583493
AT2G16860	GCIP-interacting family protein;(source:Araport11)	AtSYF2	0.503024956177547	0.00886192979341598
AT2G16930	Ribosomal protein L27 family protein;(source:Araport11)	NA	0.807012774306482	2.45605491145637e-07
AT2G16940	Splicing factor which interacts with IRR and SR45 to mediate pre-mRNA splicing to facilitate protein function, however not contributing to target specificity.	NA	0.832292109756182	2.77402405471978e-19
AT2G16970	Major facilitator superfamily protein;(source:Araport11)	MEE15	1.14124921273927	0.00635410820730405
AT2G16980	Major facilitator superfamily protein;(source:Araport11)	NA	0.987287861810143	4.25639939944119e-06
AT2G17020	F-box/RNI-like superfamily protein;(source:Araport11)	NA	0.504519899755865	7.16826333644166e-06
AT2G17030	Encodes a SKP1/ASK-interacting protein.	AtSKIP23,SKIP23	0.516107356831108	0.000726699742209874
AT2G17036	F-box SKIP23-like protein (DUF295);(source:Araport11)	NA	2.0735788865756	1.92811059652795e-24
AT2G17060	Disease resistance protein (TIR-NBS-LRR class) family;(source:Araport11)	NA	1.34764430990512	6.41273636279635e-05
AT2G17130	Encodes a regulatory subunit of the mitochondrially-localized NAD+- dependent isocitrate dehydrogenase.	IDH-II,IDH2	0.784657455557052	1.57330460795902e-11
AT2G17200	Encodes a ubiquitin receptor protein that specifically associates with PEX2 and PEX12.	DSK2,DSK2b	0.265789016194169	0.000288663835324802
AT2G17280	Phosphoglycerate mutase family protein;(source:Araport11)	NA	0.971358224277938	9.52740072263522e-07
AT2G17290	Encodes calcium dependent protein kinase 6 (CPK6), a member of the Arabidopsis CDPK gene family. CDPKs contain an intrinsic Ca2+-activation domain with four EF hand Ca2+-binding sites. CDPKs protein kinases have been proposed to function in multiple plant signal transduction pathways downstream of [Ca2+]cyt elevations, thus transducing various physiological responses. CPK6 is expressed in both gu…	ATCDPK3,ATCPK6,CPK6	0.66311635863264	1.8569930269769e-13
AT2G17320	pantothenate kinase;(source:Araport11)	NA	1.03681399096068	9.836791626667e-13
AT2G17370	Encodes a 3-hydroxy-3-methylglutaryl-CoA reductase (HMGR) that is involved in the synthesis of sterol and triterpenoid compounds.	HMG2,HMGR2	0.815561635703185	2.22669644634024e-12
AT2G17390	Highly homologous to AKR2A. Involved in chloroplast biogenesis. Double mutants of AKR2A and AKR2B have yellow leaves, significantly reduced chloroplast proteins, and no thylakoid membranes. The mRNA is cell-to-cell mobile.	AKR2B	0.425272743416932	2.42982543821458e-07
AT2G17410	AT Rich domain protein.	ARID2	0.402892980932493	6.3115390346112e-05
AT2G17440	Encodes PIRL5, a member of the Plant Intracellular Ras-group-related LRRs (Leucine rich repeat proteins). PIRLs are a distinct, plant-specific class of intracellular LRRs that likely mediate protein interactions, possibly in the context of signal transduction. The mRNA is cell-to-cell mobile.	PIRL5	0.295598087597039	0.00047116823317265
AT2G17450	Encodes a putative RING-H2 finger protein RHA3a.	RHA3A	1.15644754719317	3.45072867529839e-30
AT2G17510	ribonuclease II family protein;(source:Araport11)	AtRRP44A,EMB2763,RRP44A	0.29299934407192	0.00573280725615299
AT2G17520	Encodes a endoribonuclease/protein kinase IRE1-like protein that is predicted to form a type I transmembrane protein structure and contain kinase/endoribonuclease domains at their C-terminal halves. The transcript levels for several ER-stress responsive genes, including six protein disulfide isomerases (PDIs), BiP2, and AtbZIP60 are not affected in ire1-2 null mutants. The mRNA is cell-to-cell mo…	ATIRE1-2,AtIRE1A,IRE1-2,IRE1A	0.487259428266351	1.04209283617844e-09
AT2G17530	Protein kinase superfamily protein;(source:Araport11)	NA	0.411709553785112	0.00327182337587708
AT2G17550	RB1-inducible coiled-coil protein;(source:Araport11)	TRM26	0.868836381079186	1.398961262332e-10
AT2G17570	Undecaprenyl pyrophosphate synthetase family protein;(source:Araport11)	AtcPT1,cPT1	0.887543806905918	0.00018364930211801
AT2G17705	methionine-S-oxide reductase;(source:Araport11)	NA	0.47633186519815	0.015176895330054
AT2G17710	Big1;(source:Araport11)	NA	1.70686859267582	1.03525136092134e-67
AT2G17720	Encodes a prolyl 4-hydroxylase that modifies the extensin proteins in root hair cells.	P4H5	1.06307052068095	2.31884215752595e-15
AT2G17730	Intrinsic thylakoid membrane protein that fixes RPOTmp on the stromal side of the thylakoid membrane.	NIP2	0.331877200737802	0.00393270241309767
AT2G17787	cylicin;(source:Araport11)	NA	0.678486825312898	4.05082152409153e-05
AT2G17840	Identified as drought-inducible gene by differential hybridization. Upregulated by high light, drought, cold and salt stress determined by microarray analysis.	ERD7	1.0177734490349	8.54337503338206e-20
AT2G17850	Rhodanese/Cell cycle control phosphatase superfamily protein;(source:Araport11)	NA	4.807132765384	0.000940272963029303
AT2G17870	Encodes COLD SHOCK DOMAIN PROTEIN 3 (CSP3), involved in the acquisition of freezing tolerance.	ATCSP3,CSP3	0.6485118463001	0.000385650398192349
AT2G17880	Chaperone DnaJ-domain superfamily protein;(source:Araport11)	DJC24	3.39291829047812	2.29695509892191e-101
AT2G17975	SRP1 is a C2C2 type zinc finger protein that binds RNA. It has a role in response to ABA.. It can bind the 3'UTR of ABI2 and appears to be involved in RNA turnover.	SRP1	0.608161843257891	0.00642213893099075
AT2G17980	member of SLY1 Gene Family The mRNA is cell-to-cell mobile.	ATSLY1	0.51684646624826	2.35897415290707e-10
AT2G17990	Calcium-dependent protein kinase 1 adaptor protein involved in vacuolar transport and lytic vacuole biogenesis.	AtCAP2	0.750614730927906	1.30738344782478e-06
AT2G18010	SAUR-like auxin-responsive protein family;(source:Araport11)	SAUR10	3.58775529417312	1.33460762895302e-05
AT2G18050	encodes a structurally divergent linker histone whose gene expression is induced by dehydration and ABA. The mRNA is cell-to-cell mobile.	HIS1-3	0.844035475606354	0.000181311709135857
AT2G18100	transmembrane/coiled-coil protein (DUF726);(source:Araport11)	NA	1.63226326855708	2.54844251033518e-06
AT2G18150	Peroxidase superfamily protein;(source:Araport11)	NA	0.79674156384244	0.00919471233485799
AT2G18170	MAP kinase 7;(source:Araport11)	ATMPK7,MPK7	1.45640067484209	3.49454227918183e-41
AT2G18196	Heavy metal transport/detoxification superfamily protein;(source:Araport11)	NA	0.749769519086602	0.0198379873259154
AT2G18250	At2g18250 encodes pantetheine-phosphate adenylyltransferase catalyzing the formation of dephospho-CoA from pantetheine 4'-phosphate. The enzyme is involved in coenzyme A biosynthesis.	ATCOAD,COAD	0.882565912285448	5.00817219804605e-05
AT2G18280	Member of TLP family The mRNA is cell-to-cell mobile.	AtTLP2,TLP2	0.512967047928278	6.25466667604789e-12
AT2G18300	DNA-binding bHLH protein involved in positive regulation of cell elongation and proliferation and, negative control of plant immunity.One component of PRE-IBH1-HBI1 tripartite module.	HBI1	0.36522161927683	0.00923088496103382
AT2G18350	homeobox protein 24;(source:Araport11)	AtHB24,HB24,ZHD6	0.968349818908434	0.000348160290124998
AT2G18440	Encodes a noncoding RNA, a member of an emerging class of transcripts that lack significant open reading frames and encode RNA as their final product. Has been identified as a translated small open reading frame by ribosome profiling.	GUT15,sORF20	1.21109664929598	1.19850088286651e-51
AT2G18620	Terpenoid synthases superfamily protein;(source:Araport11)	GGPPS2	0.860993300674066	0.0286280070949438
AT2G18670	RING/U-box superfamily protein;(source:Araport11)	NA	0.793855772638965	1.41892762621472e-07
AT2G18700	Encodes an enzyme putatively involved in trehalose biosynthesis. The protein has a trehalose synthase (TPS)-like domain that may or may not be active as well as a trehalose phosphatase (TPP)-like domain.	ATTPS11,ATTPSB,TPS11,TPS11	0.976317424871257	1.82379057130975e-20
AT2G18750	Calmodulin-binding protein;(source:Araport11)	NA	0.368019349620069	0.000117416325339752
AT2G18800	xyloglucan endotransglucosylase/hydrolase 21;(source:Araport11)	ATXTH21,XTH21	2.66027427639358	0.00277134528912509
AT2G18876	Encodes a microtubule-associated protein.	NA	1.15135577485693	6.48980010236222e-09
AT2G18915	encodes a member of F-box proteins that includes two other proteins in Arabidopsis (ZTL and FKF1). These proteins contain a unique structure containing a PAS domain at their N-terminus, an F-box motif, and 6 kelch repeats at their C-terminus. Overexpression results in arrhythmic phenotypes for a number of circadian clock outputs in both constant light and constant darkness, long hypocotyls under …	ADO2,LKP2	0.366689237751237	0.00368146098304557
AT2G18960	Encodes a plasma membrane proton ATPase. Mutants have a reduced ability to close their stomata in response to drought and are affected in stomatal but not seed responsiveness to ABA. The mRNA is cell-to-cell mobile.	AHA1,HA1,OST2,PMA	0.507157475220371	1.13555479557873e-13
AT2G18969	Encodes a atypical member of the bHLH (basic helix-loop-helix) family transcriptional factors.	NA	2.07236827779465	0.000247043117255997
AT2G18980	Class III peroxidase cell wall-targeted protein localized to the micropylar endosperm facing the radicle. Involved in seed germination.	NA	0.429157700893122	0.00331205677757815
AT2G18990	thioredoxin-like/ATP-binding protein;(source:Araport11)	TXND9	0.613464673439187	0.0155473639248694
AT2G19110	Encodes a protein with similarity to Zn ATPase. Can rescue Zn deficiency in yeast and Cd resistance, suggesting a role in Zn and Cd transport. The mRNA is cell-to-cell mobile.	ATHMA4,HMA4	0.374289894088998	2.27638880327759e-05
AT2G19260	RING/FYVE/PHD zinc finger superfamily protein;(source:Araport11)	NA	0.470464376941628	0.0170633467891364
AT2G19270	mitotic checkpoint protein PRCC-carboxy-term protein;(source:Araport11)	NA	0.430252771288184	9.66922419531891e-05
AT2G19350	transmembrane protein (DUF872);(source:Araport11)	NA	0.537991295623542	0.0345873654155201
AT2G19430	This gene is predicted to encode a protein with a DWD motif. It can bind to DDB1a in Y2H assays, and DDB1b in co-IP assays, and may be involved in the formation of a CUL4-based E3 ubiquitin ligase. Encodes a component of the putative Arabidopsis THO/TREX complex: THO1 or HPR1 (At5g09860), THO2 (At1g24706), THO3 or TEX1 (At5g56130), THO5 (At5g42920, At1g45233), THO6 (At2g19430), and THO7 (At5g1679…	AtTHO6,DWA1,THO6	0.367065090673793	0.0381423395724782
AT2G19450	Encodes Acyl-CoA:diacylglycerol acyltransferase (DGAT) catalyzes the final step of the triacylglycerol synthesis pathway. An insertion mutation in the TAG1 gene results in altered lipid phenotype. Role in senescence and seed development. Its preferred substrate is linolenoyl-CoA (C18:3-CoA).	ABX45,AS11,ATDGAT,AtDGAT1,DGAT1,RDS1,TAG1	0.992236860418488	6.97502868521408e-22
AT2G19480	This gene is predicted to encode a nucleosome assembly protein. Plant lines expressing an RNAi construct directed against this gene show a reduction in agrobacterium-mediated root transformation. The mRNA is cell-to-cell mobile. Plants mutated in three ubiquitously expressed NAP1 genes (NAP1;1~NAP1;3) and organ-specifically expressed NAP1;4 gene show hypersensitivity to genotoxic stresses includi…	NAP12,NFA02,NFA2	0.758426012571498	6.44996221943425e-14
AT2G19570	Encodes a cytidine deaminase that deaminates cytidine and deoxycytidine and is competitively inhibited by cytosine-containing compounds.	AT-CDA1,CDA1,DESZ	0.478703225313077	3.79732286650269e-07
AT2G19660	Cysteine/Histidine-rich C1 domain family protein;(source:Araport11)	NA	4.45428969293359	1.24876754177705e-90
AT2G19740	Ribosomal protein L31e family protein;(source:Araport11)	NA	0.84998582043443	0.00824397789808368
AT2G19760	first member of the Arabidopsis profilin multigene family, expressed in all organs of Arabidopsis. Binds poly-L-proline. The first intron of PRF1 enhances gene expression in vegetative tissues.	PFN1,PRF1	1.29115595739163	6.66424379055204e-23
AT2G19790	Encodes a component of the AP4 complex and is involved in vacuolar sorting of storage proteins.	AP4S	0.543700253451524	0.000794312296736827
AT2G19810	Encodes Oxidation-related Zinc Finger 1 (OZF1), a plasma membrane protein involved in oxidative stress.	AtOZF1,AtTZF2,OZF1,TZF2	1.74733100776013	1.57083725459154e-41
AT2G19950	This gene is predicted to encode a protein that functions as a Golgi apparatus structural component known as a golgin in mammals and yeast. A fluorescently-tagged version of GC1 co-localizes with Golgi markers, and this localization appears to be replicated using the C-terminal (558-715 aa) portion of the protein.	GC1	0.66533115532635	6.43968568298333e-10
AT2G19970	CAP (Cysteine-rich secretory proteins, Antigen 5, and Pathogenesis-related 1 protein) superfamily protein;(source:Araport11)	NA	0.752471281175375	0.00868261307022124
AT2G20010	Gls protein (DUF810);(source:Araport11)	NA	0.681680034143324	8.83435468536574e-12
AT2G20080	hypothetical protein;(source:Araport11)	TIE2	2.30205912054582	6.64447999145297e-09
AT2G20120	Encodes an integral membrane protein of unknown function, highly conserved between plants and bacteria; is likely to be involved in a mechanism that negatively regulates the differentiation of vascular tissue in the stem. Mutants display a dramatic increase in vascular tissue development in the stem in place of the interfascicular region that normally separates the vascular bundles.	COV1	0.552461897102065	3.58443689712939e-09
AT2G20142	Toll-Interleukin-Resistance (TIR) domain family protein;(source:Araport11)	NA	0.837896435374074	0.0383908947203379
AT2G20230	Tetraspanin family protein;(source:Araport11)	NA	0.175231307396744	0.0340424695164854
AT2G20440	Ypt/Rab-GAP domain of gyp1p superfamily protein;(source:Araport11)	NA	1.08578576462727	2.17288324675885e-05
AT2G20515	pollen Ole e I family allergen protein;(source:Araport11)	NA	1.29526593718716	0.0013796507623697
AT2G20670	sugar phosphate exchanger, putative (DUF506);(source:Araport11)	NA	0.897695663789116	6.64997161003889e-11
AT2G20680	Encodes a mannanase belonging to clade 1 of the GH5 7 phylogenetic tree that exhibits high substrate affinity and catalytic efficiency on mannan substrates with main chains containing both glucose and mannose units such as konjac glucomannan and spruce galactoglucomannan. It is likely a glycoprotein.	AtMAN2,MAN2,MAN5-2	1.05171411695996	1.73966275186113e-09
AT2G20770	Encodes a protein with reported similarity to GCR2 a putative G protein coupled receptor thought to be an ABA receptor.GCL2 also has similarity to LANCL1 and LANCL2, human homologs of bacterial lanthionine synthetase.	GCL2	0.875631431752451	0.039439227099075
AT2G20780	Major facilitator superfamily protein;(source:Araport11)	NA	1.05128540526563	4.15104936124078e-27
AT2G20835	hypothetical protein;(source:Araport11)	NA	1.83299508424838	0.000680505101668958
AT2G20840	Secretory carrier membrane protein (SCAMP) family protein;(source:Araport11)	AtSCAMP3,SCAMP3	0.4934622881086	0.000158469436933252
AT2G20880	Encodes ERF53, a drought-induced transcription factor. Belongs to the AP2/ERF superfamily, and has a highly conserved AP2 domain. Regulates drought-responsive gene expressions by binding to the GCC box and/or dehydration-responsive element (DRE) in the promoter of downstream genes. Overexpression of AtERF53 driven by the CaMV35S promoter resulted in an unstable drought-tolerant phenotype in T2 tr…	AtERF53,ERF53	1.77586050396023	0.000288062886093218
AT2G20960	phospholipase-like protein (PEARLI 4) family protein;(source:Araport11)	pEARLI4	0.614865718640416	1.71381357291884e-13
AT2G21060	Glycine-rich protein (AtGRP2b). Also named as CSP4 (cold shock domain protein 4) containing a well conserved cold shock domain (CSD) and glycine-rich motifs interspersed by two retroviral-like CCHC zinc fingers. AtCSP4 is expressed in all tissues but accumulates in reproductive tissues and those undergoing cell divisions. Overexpression of AtCSP4 reduces silique length and induces embryo lethalit…	ATCSP4,ATGRP2B,GRP2B	2.2553351268653	2.54894242935125e-49
AT2G21130	Cyclophilin-like peptidyl-prolyl cis-trans isomerase family protein;(source:Araport11)	NA	1.06192962639227	0.00230147365107837
AT2G21140	Proline-rich protein expressed in expanding leaves, stems, flowers, and siliques.	ATPRP2,PRP2	1.16320051714001	3.42875747435892e-15
AT2G21195	hypothetical protein;(source:Araport11)	NA	0.659798631679268	0.0367081173346347
AT2G21240	Encodes a member of the BASIC PENTACYSTEINE (BPC) proteins. BPC proteins are plant-specific transcription factors present throughout land plants. BPC transcription factor family is integral for a wide range of processes that support normal growth and development.	ATBPC4,BBR,BPC4	0.583439451626608	1.19089051941529e-08
AT2G21300	ATP binding microtubule motor family protein;(source:Araport11)	NA	0.389382908459031	0.00218691396068597
AT2G21390	Coatomer subunit alpha-2. Part of endomembrane trafficking system. Interacts with SINAT1.	NA	0.428605851666436	2.4366358534275e-10
AT2G21410	Vacuolar proton ATPase subunit VHA-a isoform 2. Localized in the tonoplast. Required for efficient nutrient storage but not for sodium accumulation.	VHA-A2	0.254194860818545	0.000294507150864514
AT2G21430	Papain family cysteine protease;(source:Araport11)	NA	0.719846978387137	0.0099795799753743
AT2G21450	chromatin remodeling 34;(source:Araport11)	CHR34	3.93574835171382	0.038182745700703
AT2G21500	RING/U-box superfamily protein;(source:Araport11)	NA	0.336576698149518	0.0126154124233985
AT2G21520	Sec14p-like phosphatidylinositol transfer family protein;(source:Araport11)	NA	0.249332839661613	0.00127562407279701
AT2G21540	SEC14-like 3;(source:Araport11)	ATSFH3,SFH3	1.79640676789863	3.01451069394965e-62
AT2G21580	Ribosomal protein S25 family protein;(source:Araport11)	NA	0.616184289584105	8.77002267125438e-11
AT2G21660	Encodes a small glycine-rich RNA binding protein that is part of a negative-feedback loop through which AtGRP7 regulates the circadian oscillations of its own transcript. Gene expression is induced by cold. GRP7 appears to promote stomatal opening and reduce tolerance under salt and dehydration stress conditions, but, promotes stomatal closing and thereby increases stress tolerance under conditio…	ATGRP7,CCR2,GR-RBP7,GRP7,RBGA3	2.30525950055457	5.10659986626318e-119
AT2G21720	ArgH (DUF639);(source:Araport11)	NA	0.977563332895842	0.0173679714889036
AT2G21820	seed maturation protein;(source:Araport11)	NA	4.34122794473848	0.00951090384651516
AT2G21850	Cysteine/Histidine-rich C1 domain family protein;(source:Araport11)	NA	0.557731093897168	3.1839785704723e-05
AT2G21880	RAB GTPase homolog 7A;(source:Araport11)	ATRAB7A,ATRABG2,RAB7A	1.34066438221148	0.000193517637076194
AT2G21900	member of WRKY Transcription Factor; Group II-c	ATWRKY59,WRKY59	3.92595646338027	0.0257572750741008
AT2G21910	member of CYP96A	CYP96A5	9.45889126351937	2.95738679233961e-28
AT2G22080	transmembrane protein;(source:Araport11)	NA	1.47179284544705	9.14569867770271e-12
AT2G22090	encodes a nuclear protein that binds to RNA with a specificity for oligouridylates in vitro. As with UBP1, transient overexpression of UBA1a in protoplasts increases the steady-state levels of reporter mRNAs in a promoter-dependent manner. Along with UBP1 and UBA2a, it may act as a component of a complex recognizing U-rich sequences in plant 3'-UTRs and contributing to the stabilization of mRNAs …	UBA1A	0.490456842419482	0.000145779668150694
AT2G22122	hypothetical protein;(source:Araport11)	NA	1.10474717946198	0.0327218610031286
AT2G22170	Lipase/lipooxygenase, PLAT/LH2 family protein;(source:Araport11)	PLAT2	0.704080123532638	1.15462591681297e-08
AT2G22200	encodes a member of the DREB subfamily A-6 of ERF/AP2 transcription factor family. The protein contains one AP2 domain. There are 8 members in this subfamily including RAP2.4.	NA	1.41070248836698	8.09734892147432e-10
AT2G22300	Encodes a putative CAM binding transcription factor. Loss of function mutations show enhanced resistance to fungal and bacterial pathogens suggesting that CAMTA functions to suppress defense responses.It acts in the cold response pathway, it can bind to and activate the expression of DREB1 genes.	CAMTA3,SR1	0.255661402913256	0.003683408785666
AT2G22310	Encodes a ubiquitin-specific protease.	ATUBP4,UBP4	0.852971755426329	0.00155473941004015
AT2G22400	TRM4B is a cytosine-5--methyltransferase. Mutants have decreased methyl cytosine and defects in root development.	AtTRM4b,TRM4B	0.888509490758503	2.37402456102867e-21
AT2G22425	Microsomal signal peptidase 12 kDa subunit (SPC12);(source:Araport11)	NA	0.986890000274107	0.00770200839279107
AT2G22430	Encodes a homeodomain leucine zipper class I (HD-Zip I) protein that is a target of the protein phosphatase ABI1 and regulates hormone responses in Arabidopsis.	ATHB6,HB6	0.629096724862846	4.31163227623876e-10
AT2G22450	riboflavin biosynthesis protein;(source:Araport11)	AtRIBA2,RIBA2	1.70496568464808	5.43556177639201e-21
AT2G22475	Encodes GL2-expression modulator (GEM). Involved in the spatial control of cell division, patterning and differentiation of Arabidopsis root epidermal cells. GEM interacts with CDT1, a DNA replication protein and TTG1 (TRANSPARENT TESTA GLABRA1), a WD40-repeat protein involved in GL2-dependent cell fate decision. GEM seems to participate in the maintenance of a repressor histone H3 epigenetics st…	GEM	0.34263695006643	0.0222711248773547
AT2G22480	Phosphofructokinase isoform; target of plastidic thioredoxin-f-dependent redox regulation.	PFK5	0.209642041088431	0.0372575836241186
AT2G22500	Encodes one of the mitochondrial dicarboxylate carriers (DIC): DIC1 (AT2G22500), DIC2 (AT4G24570), DIC3 (AT5G09470).	ATPUMP5,DIC1,UCP5	1.01632851706804	6.33043384351193e-11
AT2G22560	Kinase interacting (KIP1-like) family protein;(source:Araport11)	NET2D	0.900215580854228	2.14984720608694e-06
AT2G22600	RNA-binding KH domain-containing protein;(source:Araport11)	NA	1.23375469385169	0.0422996270847539
AT2G22620	Rhamnogalacturonate lyase family protein;(source:Araport11)	NA	0.844035989959278	0.00546437887404874
AT2G22650	FAD-dependent oxidoreductase family protein;(source:Araport11)	NA	0.994244055230436	3.85295137261809e-09
AT2G22660	Encodes a member of a family of DUF1399 domain containing proteins. GRDP1 is involved in germination and response to ABA. Loss of function mutants have reduced germination in the presence of osmotic stressors.	AtGRDP1	1.64919907055008	5.11770903711774e-101
AT2G22680	Zinc finger (C3HC4-type RING finger) family protein;(source:Araport11)	WAVH1	0.772278795419716	7.43007656040218e-17
AT2G22720	SPT2 chromatin protein;(source:Araport11)	NA	0.49870242891125	4.02957187535504e-07
AT2G22730	Major facilitator superfamily protein;(source:Araport11)	NA	0.793194465942445	0.00686541303052897
AT2G22780	encodes an peroxisomal NAD-malate dehydrogenase that is involved in fatty acid beta-oxidation through providing NAD to the process of converting fatty acyl CoA to acetyl CoA.	PMDH1	0.702328914262905	1.57443760865424e-18
AT2G22830	squalene epoxidase 2;(source:Araport11)	SQE2	0.509309163946271	0.0122362477004405
AT2G22840	Growth regulating factor encoding transcription activator. One of the nine members of a GRF gene family, containing nuclear targeting domain. Mutants result in smaller leaves indicating the role of the gene in leaf development. Expressed in root, shoot and flower	AtGRF1,GRF1	0.814020894686627	1.28069440843812e-10
AT2G22860	Phytosulfokine 2 precursor, coding for a unique plant peptide growth factor. The mRNA is cell-to-cell mobile.	ATPSK2,PSK2	1.29578539832007	0.000252913119884845
AT2G22880	VQ motif-containing protein;(source:Araport11)	VQ12	1.76042875192186	0.00837437362049477
AT2G22890	Kua-ubiquitin conjugating enzyme hybrid localization domain-containing protein;(source:Araport11)	NA	2.54600111156111	2.86788621769714e-34
AT2G22930	UDP-Glycosyltransferase superfamily protein;(source:Araport11)	NA	1.77942791431993	0.00013457865925865
AT2G22970	serine carboxypeptidase-like 11;(source:Araport11)	SCPL11	0.682146237489815	7.92478130535933e-06
AT2G23030	encodes a member of SNF1-related protein kinases (SnRK2)	SNRK2-9,SNRK2.9	2.34426520324114	8.71078676643656e-17
AT2G23050	A member of the NPY gene family (NPY1/AT4G31820, NPY2/AT2G14820, NPY3/AT5G67440, NPY4/AT2G23050, NPY5/AT4G37590). Involved in auxin-mediated organogenesis.	MEL4,NPY4	1.02919204372139	0.0010371267469877
AT2G23090	Uncharacterized protein family SERF;(source:Araport11)	NA	0.409516152058539	0.0246071210350352
AT2G23120	Late embryogenesis abundant protein, group 6;(source:Araport11)	NA	0.474297785377966	0.0261570848880926
AT2G23140	PUB4 encodes a functional ubiquitin-protein ligase. The gene is expressed in most plant tissues and the protein localizes to the nucleus. PUB4 has been recovered as a second site suppressor from several different genetic screens and from these, it has been inferred to have roles in regulating root development, pollen tapetum development and ROS induced chloroplast degredation.	AtPUB4,PUB4	0.385911512570537	9.43509158565267e-05
AT2G23170	encodes an IAA-amido synthase that conjugates Asp and other amino acids to auxin in vitro.	GH3.3	1.38228176842868	7.50720265515434e-10
AT2G23290	Member of the R2R3 factor gene family.	AtMYB70,MYB70	0.782954433162758	0.00086312238349307
AT2G23360	filament-like protein (DUF869);(source:Araport11)	NA	0.428546445004504	0.0369794076714987
AT2G23380	Similar to the product of the Polycomb-group gene Enhancer of zeste. Catalytic component of the PRC2 complex.Required for stable repression of AG and AP3. Putative role in cell fate determination. Involved in the control of leaf morphogenesis. mutants exhibit curled, involute leaves. AGAMOUS and APETALA3 are ectopically expressed in the mutant.	CLF,ICU1,SDG1,SET1	0.502816769642216	0.000268265709886941
AT2G23400	Undecaprenyl pyrophosphate synthetase family protein;(source:Araport11)	AtCPT2,CPT2	1.90611239592103	0.0318426412920122
AT2G23410	Encodes cis-prenyltransferase involved in dolichol biosynthesis.	ACPT,AtcPT3,CPT,cPT3	1.81994492373232	0.000348139684168495
AT2G23450	Protein kinase superfamily protein;(source:Araport11)	NA	0.394859106066488	4.96441644319141e-06
AT2G23460	encodes a novel G-alpha protein that shares similarity to plant, yeast, and animal G-alpha proteins at the C-terminus. It contains an N-terminus that is as large as the C-terminus, is a member of a small family, and is expressed in all tissues examined, including roots, leaves, stems, flowers, and fruits.	ATXLG1,XLG1	0.480112017935529	2.37075764432422e-07
AT2G23520	Pyridoxal phosphate (PLP)-dependent transferases superfamily protein;(source:Araport11)	NA	0.284664151910742	0.0368115571210028
AT2G23620	Encodes a protein shown to have carboxylesterase activity, methyl salicylate esterase activity, methyl jasmonate esterase activity, and methyl IAA esterase activity in vitro. MES1 appears to be involved in MeSA hydrolysis in planta. Expression of MES1 can restore systemic acquired resistance in SAR-deficient tobacco plants. This protein does not act on MeGA4, or MEGA9 in vitro.	ATMES1,MES1	1.18232120216836	1.51712736973773e-12
AT2G23780	Leucine rich extensin protein involved in cell wall biogenesis and organization. Interacts with several members of the RALF family of ligand peptides.	LRX4	0.309421135325101	0.00651195523149044
AT2G23790	calcium uniporter (DUF607);(source:Araport11)	NA	1.70844307473724	6.62605517706867e-31
AT2G23810	Member of TETRASPANIN family	TET8	0.474195895989742	2.33014209651961e-06
AT2G23980	Encodes a cyclic GMP-activated non-selective cation channel in the plasma membrane of guard cells. Required for constitutive growth of root hairs as Ca2+-permeable channels.	ATCNGC6,CNGC6	0.518303308868295	6.70825289924973e-10
AT2G23985	hypothetical protein;(source:Araport11)	NA	1.15698169222152	0.0434399678239769
AT2G24070	QWRF motif protein (DUF566);(source:Araport11)	QWRF4	1.68244063698004	1.26061862860244e-06
AT2G24130	Leucine-rich receptor-like protein kinase family protein;(source:Araport11)	NA	2.65705661070468	6.03921518845275e-06
AT2G24200	Cytosol aminopeptidase family protein;(source:Araport11)	atLAP1,LAP1	0.188791254770271	0.0202157470132801
AT2G24220	Member of a family of proteins related to PUP1, a purine transporter. May be involved in the transport of purine and purine derivatives such as cytokinins, across the plasma membrane.	ATPUP5,PUP5	0.543570704714623	0.0255809674839278
AT2G24240	BTB/POZ domain with WD40/YVTN repeat-like protein;(source:Araport11)	NA	0.815696592943739	5.32987348839812e-09
AT2G24260	Encodes a basic helix-loop-helix (bHLH) protein that regulates root hair and sperm cell development. One of the three Arabidopsis homologs of the Lotus japonicus ROOTHAIRLESS1 (LjRHL1) gene: At2g24260 (AtLRL1), At4g30980 (AtLRL2), and At5g58010 (AtLRL3).	DROP1,LRL1	0.320105267370685	0.00186768036604049
AT2G24290	ubiquitin-associated protein (DUF1068);(source:Araport11)	NA	0.414530467434399	0.00139420217911641
AT2G24300	Calmodulin-binding protein;(source:Araport11)	NA	2.70503118750302	5.73444926738256e-46
AT2G24360	STYK serine threonine kinase that phosphorylates several oil body proteins including OLE1 and CLO4/CAL4.	RAF22,STYK	0.680046567959439	1.63656763987984e-13
AT2G24400	SAUR-like auxin-responsive protein family;(source:Araport11)	SAUR38	1.73185458498549	0.0404769750126602
AT2G24450	Fasciclin-like arabinogalactan protein. Possibly involved in embryogenesis and seed development.	FLA3	4.15970751550782	5.22082518248019e-05
AT2G24520	plasma membrane H+-ATPase;(source:Araport11)	AHA5,HA5	0.282952429164081	0.0306053986091263
AT2G24530	Member of SAGA complex, SPT modulu subunit, interacts with HAG1.	NA	1.06764433629661	5.57992563093038e-07
AT2G24535	hypothetical protein;(source:Araport11)	NA	2.22956863851794	0.00987238534742541
AT2G24550	major centromere autoantigen B-like protein;(source:Araport11)	NA	0.605184015977073	0.000905155019526943
AT2G24590	Barta et al (2010) have proposed a nomenclature for Serine/Arginine-Rich Protein Splicing Factors (SR proteins): Plant Cell. 2010, 22:2926.	At-RSZ22a,RSZ22a	0.355269078872996	0.000267555352904227
AT2G24610	member of Cyclic nucleotide gated channel family	ATCNGC14,CNGC14	0.901646530206055	8.19488133776723e-05
AT2G24640	ubiquitin-specific protease 19;(source:Araport11)	UBP19	0.269166141821654	0.0218615694779056
AT2G24650	B3 domain-containing protein REM13;(source:Araport11)	NA	0.560272131167987	0.00462659996257737
AT2G24755	Natural antisense transcript overlaps with AT2G24750 and AT2G24760;(source:Araport11)	NA	0.459209755372593	5.42439037421221e-08
AT2G24765	GTPase required for Golgi targeting of GRIP domain proteins. AtARL1 binds directly to the GRIP domain of AtGRIP in a GTP-dependent manner	ARF3,ARL1,ATARL1	1.29119139232635	5.68756015118063e-21
AT2G24790	Positive regulator of photomorphogenesis that acts downstream of COP1 but can promote lateral root development independently of COP1 and also function as a daylength-sensitive regulator of shoot branching. The mRNA is cell-to-cell mobile.	ATCOL3,BBX4,COL3	0.274576931870601	0.00339024025943327
AT2G24800	Peroxidase superfamily protein;(source:Araport11)	NA	1.41981788596213	1.0343441088276e-06
AT2G25010	Encodes a nuclear localized aminotransferase like protein containing a plant mobile domain. MAIL1 is expressed in the root, SAM, leaves, flowers and embryo. Loss of function mutations display defects in root and shoot growth. In the root, primary root growth terminates early. In the shoot, leaf development is delayed, and lateral organs are smaller than normal. MAIL1 appears to affect meristem ce…	MAIL1	0.78838103782731	9.16901269519526e-06
AT2G25070	Protein phosphatase 2C family protein;(source:Araport11)	NA	0.44017327270871	3.67060405156401e-06
AT2G25095	Encodes a microRNA that targets several SPL family members, including SPL3,4, and 5. By regulating the expression of SPL3 (and probably also SPL4 and SPL5), this microRNA regulates vegetative phase change. MicroRNAs are regulatory RNAs with a mature length of ~21-nucleotides that are processed from hairpin precursors by Dicer-like enzymes. MicroRNAs can negatively regulate gene expression by atte…	MIR156A	3.00563786312593	5.49570504019919e-07
AT2G25130	ARM repeat superfamily protein;(source:Araport11)	NA	3.00058873076507	4.11425971225221e-07
AT2G25150	HXXXD-type acyl-transferase family protein;(source:Araport11)	NA	3.44834980799487	9.51496015805985e-13
AT2G25160	cytochrome P450, family 82, subfamily F, polypeptide 1;(source:Araport11)	CYP82F1	1.04893375354511	1.17539393339606e-13
AT2G25210	Ribosomal protein L39 family protein;(source:Araport11)	NA	0.52124687700824	0.00089406808083903
AT2G25220	Protein kinase superfamily protein;(source:Araport11)	NA	1.27044881880204	6.02701576009134e-10
AT2G25250	serine/arginine repetitive matrix-like protein;(source:Araport11)	NA	0.376880506145538	0.00675001002194155
AT2G25260	Hyp O-arabinosyltransferase-like protein;(source:Araport11)	HPAT2	0.53422067908964	0.00216307073244377
AT2G25350	Phox (PX) domain-containing protein;(source:Araport11)	NA	0.491938464906314	0.0131848061138306
AT2G25430	AP180 N-terminal homology domain, TPLATE complex protein involved in clathrin-mediated endocytosis.	AtECA4,PICALM4a	0.241147003927437	0.00170613642701572
AT2G25490	Encodes an F-box protein involved in the ubiquitin/proteasome-dependent proteolysis of EIN3. The mRNA is cell-to-cell mobile.	EBF1,FBL6	0.692996996272924	7.27516611184288e-20
AT2G25590	Plant Tudor-like protein;(source:Araport11)	NA	1.17903116472582	2.99684243951027e-13
AT2G25640	SPOC domain / Transcription elongation factor S-II protein;(source:Araport11)	NA	0.293589452010594	0.0437493549834344
AT2G25660	Translocon at the inner-envelope membrane of chloroplasts which binds to the outer-membrane channel TOC75.	emb2410,TIC236	0.309820126530874	0.000656301485746655
AT2G25690	DUF581 family protein, putative (DUF581);(source:Araport11)	NA	0.932258705837821	1.05716902595266e-07
AT2G25730	zinc finger FYVE domain protein;(source:Araport11)	NA	0.268838881008126	4.39600990105525e-05
AT2G25740	ATP-dependent protease La (LON) domain protein;(source:Araport11)	NA	0.626908079907492	5.48239521319926e-07
AT2G25760	Casein kinase involved in phosphorylation and ubiquination of RYR/PYLs, resulting in negative regulation of ABA response. Plays a role in repressing the transition from vegetative to reproductive phase.	AEL1,MLK3,PPK4	0.450322559253836	1.29940982692975e-06
AT2G25770	Polyketide cyclase/dehydrase and lipid transport superfamily protein;(source:Araport11)	NA	2.20454599372379	0.0188861661515401
AT2G25790	Leucine-rich receptor-like protein kinase family protein;(source:Araport11)	SKM1	0.469712005369679	7.21291016193824e-08
AT2G25800	elongation factor Ts (DUF810);(source:Araport11)	NA	0.209901592491516	0.00569498695531618
AT2G25850	Encodes a poly(A) polymerase. Located in the nucleus.	PAPS2	0.642434083330309	3.58480435369406e-13
AT2G25900	Encodes a protein with two tandem-arrayed CCCH-type zinc fingers that binds RNA and is involved in RNA turnover. The mRNA is cell-to-cell mobile.	ATCTH,ATTZF1,TZF1	0.767861191520356	1.65544135807569e-12
AT2G25910	3-5 exonuclease domain-containing protein / K homology domain-containing protein / KH domain-containing protein;(source:Araport11)	NA	0.699458685378492	2.57795246719803e-14
AT2G25930	Encodes a nuclear protein that is expressed rhythmically and interacts with phytochrome B to control plant development and flowering through a signal transduction pathway. Required component of the core circadian clock regardless of light conditions.	ELF3,PYK20	1.27424163763477	2.72756631080248e-62
AT2G25964	hypothetical protein;(source:Araport11)	NA	1.58376048192513	0.00017551007541785
AT2G25970	KH domain-containing protein;(source:Araport11)	NA	0.444795812943576	5.15085598509795e-09
AT2G25980	Mannose-binding lectin superfamily protein;(source:Araport11)	NA	0.596281462087576	0.00148829772138137
AT2G26030	F-box/RNI-like/FBD-like domains-containing protein;(source:Araport11)	NA	0.626832199783761	2.35393817576048e-05
AT2G26060	Encodes a homolog of the yeast Cytosolic Iron-sulfur protein Assembly protein CIA1.	CIA1,emb1345	0.565874219226619	5.53703914790509e-06
AT2G26070	Encodes a predicted membrane protein. Similar sequences are widely distributed and conserved in plants, animals and protists but absent in fungi and prokaryotes. The sequence has no known motifs and no biological function has been assigned in any species. In Arabidopsis, it appears to be involved in the negative regulation of the response to ethylene, is localized to the Golgi and is a positive r…	AtRTE1,RTE1	0.737263202878792	7.46080475266529e-07
AT2G26110	bromodomain protein (DUF761);(source:Araport11)	NA	0.614670226354396	0.000430061193940818
AT2G26210	Ankyrin repeat family protein;(source:Araport11)	NA	0.375012817899702	0.000795816396631592
AT2G26230	Encodes a urate oxidase that is involved in peroxisome maintenance.	UOX	0.365447578849062	2.632104970178e-05
AT2G26290	root-specific kinase 1;(source:Araport11)	ARSK1	1.04082196325914	0.0046305709504688
AT2G26300	Encodes an alpha subunit of a heterotrimeric GTP-binding protein. The active GTP-bound form of GPA1 binds to the GTG1 and GTG2 abscisic acid (ABA) receptors and appears to affect their GTPase and GTP-binding activity, and hence, ABA binding abilities. GPA1 is a positive regulator in ABA-mediated inhibition of stomatal opening. Plants with recessive mutant alleles have complex phenotypes including…	ATGPA1,GP_ALPHA_1,GPA1	0.824027658900935	2.88176119006528e-08
AT2G26330	Homologous to receptor protein kinases. Involved in specification of organs originating from the shoot apical meristem. Contains a cytoplasmic protein kinase catalytic domain, a transmembrane region, and an extracellular leucine-rich repeat. ER has been identified as a quantitative trait locus for transpiration efficiency by influencing epidermal and mesophyll development, stomatal density and po…	ER,QRP1	0.991320818394293	2.14896915425097e-36
AT2G26355	Natural antisense transcript overlaps with AT2G26360. The RNA is cell-to-cell mobile.	NA	0.658158800769731	1.58477734186184e-12
AT2G26360	Mitochondrial substrate carrier family protein;(source:Araport11)	NA	1.01178947757347	0.00491033701924141
AT2G26390	Serine protease inhibitor (SERPIN) family protein;(source:Araport11). Involved in stress response regulated cell death.	SERP4	2.60288820174905	2.66635595983703e-05
AT2G26430	Encodes an ania-6a type arginine-rich cyclin which confers tolerance to LiCl and NaCl when expressed in yeast.	ATRCY1,MOS12,RCY1	0.940050022887462	1.42476662747019e-21
AT2G26440	Plant invertase/pectin methylesterase inhibitor superfamily;(source:Araport11)	PME12	2.65345726133882	1.31250104070064e-15
AT2G26510	Encodes a plasma-membrane localized nucleobase transporter capable of transporting adenine, guanine, uracil and hypoxanthine. Likely to be a proton-nucleobase symporter.	NAT3,PDE135	0.369188086396409	0.000100724710212419
AT2G26650	Encodes AKT1, a member of the Shaker family inward rectifying potassium channel predominantly expressed in predominantly in root hairs and root endodermis. This family includes five groups based on phylogenetic analysis (FEBS Letters (2007) 581: 2357): I (inward rectifying channel): AKT1 (AT2G26650), AKT5 (AT4G32500) and SPIK (also known as AKT6, AT2G25600); II (inward rectifying channel): KAT1 (…	AKT1,ATAKT1,KT1	0.813384854463032	1.33715215406394e-16
AT2G26660	SPX domain-containing protein 2 (SPX2);(source:Araport11)	ATSPX2,SPX2	1.35373460971133	1.07809553939673e-05
AT2G26695	Ran BP2/NZF zinc finger-like superfamily protein;(source:Araport11)	NA	2.31906246561494	0.00246531287835528
AT2G26700	Member of AGC VIIIa Kinase gene family. Encodes PID2, a homolog of PID. Simultaneous disruption of PID(AT2G34650) and its 3 closest homologs (PID2/AT2G26700, WAG1/AT1G53700, and WAG2/AT3G14370) abolishes the formation of cotyledons.	AGC1-10,PID2	0.775728042066567	0.00199938135962985
AT2G26710	Encodes a member of the cytochrome p450 family that serves as a control point between multiple photoreceptor systems and brassinosteroid signal transduction. Involved in brassinolide metabolism. Mediates response to a variety of light signals including hypocotyl elongation and cotyledon expansion.	BAS1,CYP72B1,CYP734A1	1.04221108364427	7.03178692041283e-15
AT2G26740	Encodes a soluble epoxide hydrolase whose expression is induced by auxin and water stress.	ATSEH,SEH	0.295237802616994	0.0230225148708224
AT2G26990	Represses photomorphogenesis and induces skotomorphogenesis in the dark.	ATCSN2,COP12,CSN2,FUS12	0.487529896021733	3.51820762991553e-06
AT2G27010	member of CYP705A	CYP705A9	1.36591826843402	5.31283245390851e-15
AT2G27050	ethylene-insensitive3-like1 (EIL1) The mRNA is cell-to-cell mobile.	AtEIL1,EIL1	0.653907508026216	1.47162262359709e-13
AT2G27110	FAR1-related sequence 3;(source:Araport11)	FRS3	0.415141592207666	0.000164714180449108
AT2G27120	Encodes a protein with similarity to DNA polymerase epsilon catalytic subunit. Based on yeast two hybrid analysis, not predicted to be a subunit of the DNA polymerase epsilon complex. No phenotype observed in homozygous mutant embryos or plants but in combination with TIL1-1/til1-1 heterozygotes arrest earlier than til1 homozygotes suggesting TIL2 functions redundantly with TIL1.	POL2B,TIL2	2.71049746446805	0.0203882390066047
AT2G27190	Encodes a root-secreted purple acid phosphatase involved in extracellular phosphate-scavenging. PEP complex component.	ATPAP12,PAP12	0.520969181670499	0.00010074112122777
AT2G27200	Encodes a cytosolic protein that shares 77.3% identity with AtLSG1-2 at the protein sequence level. The mRNA is cell-to-cell mobile.	LSG1-1	1.12975964321669	2.75829755326933e-11
AT2G27230	Encodes a nuclear-localized transcriptional activator with weak sequence similarity to basic helix-loop-helix(bHLH)-domain proteins. It promotes the production of stele cells in root meristems and is required to establish and maintain the normal vascular cell number and pattern in primary and lateral roots.	LHW	0.619383531787005	1.66198007520826e-10
AT2G27340	N-acetylglucosaminylphosphatidylinositol de-N-acetylase family protein;(source:Araport11)	NA	0.816136029972354	1.8579963590432e-06
AT2G27350	Encodes an otubain-like histone deubiquitinase involved in chromatin modification and regulation of plant gene expression.	OTLD1	0.456351153556246	2.32051787748297e-05
AT2G27370	Uncharacterized protein family (UPF0497);(source:Araport11)	CASP3	1.38599784532988	9.54813379283166e-18
AT2G27380	Encodes an extensin like gene involved in seed germination.	ATEPR1,EPR1	1.07635923621747	0.0332948404082407
AT2G27480	Calcium-binding EF-hand family protein;(source:Araport11)	NA	0.644092111479792	0.00506127753511212
AT2G27490	AT2G27490 encodes dephospho-CoA kinase. The molecular function was shown to phosphorylate the ribosyl moiety forming CoA.	ATCOAE	1.03769864659708	3.28132203728627e-06
AT2G27510	ferredoxin 3;(source:Araport11)	ATFD3,FD3	0.754110636540591	2.61853765385042e-13
AT2G27600	Encodes a SKD1 (Suppressor of K+ Transport Growth Defect1) homolog. Localized to the cytoplasm and to multivesicular endosomes. Involved in multivesicular endosome function. The mRNA is cell-to-cell mobile.	ATSKD1,SKD1,VPS4	0.206850368597993	0.00375730807689543
AT2G27690	Encodes a CYP94C1. Has highest omega-hydroxylase activity with 9,10-epoxystearic acid, while also metabolized lauric acid (C12:0) and C18 unsaturated fatty acids. Gene expression is induced in response to wounding and jasmonic acid treatment.	CYP94C1	1.52244922582187	4.68810087592129e-06
AT2G27740	RAB6-interacting golgin (DUF662);(source:Araport11)	NA	1.22009848274684	0.0399844015659466
AT2G27830	hypothetical protein;(source:Araport11)	NA	2.02406487318669	3.09881291462858e-69
AT2G27860	Encodes UDP-d-apiose/UDP-d-xylose synthase that requires NAD+ for enzymatic activity and is strongly inhibited by UDP-d-galacturonate.	AXS1	0.648866926690551	8.86758760538026e-19
AT2G27900	coiled-coil protein;(source:Araport11)	NA	0.285220828342313	0.000189465054723183
AT2G27930	PLATZ transcription factor family protein;(source:Araport11)	NA	1.46321202890944	2.56354533734136e-05
AT2G27950	Ring/U-Box superfamily protein;(source:Araport11)	NA	0.403511368458552	0.000478327302995728
AT2G28040	Eukaryotic aspartyl protease family protein;(source:Araport11)	NA	1.20057768946736	0.00250548893440595
AT2G28070	ABC-2 type transporter family protein;(source:Araport11)	ABCG3	0.459480163089793	0.000222814304333334
AT2G28100	Encodes a protein with &	ATFUC1,FUC1	0.750874416728256	1.81589734842544e-09
AT2G28110	Homolog to AT5G22940, a member of glycosyltransferase family 47 that is involved in secondary cell wall biosynthesis. It exhibits high sequence similarity to tobacco (Nicotiana plumbaginifolia) pectin glucuronyltransferase. Protein has a domain that shares significant similarity with the pfam03016 domain. It is expressed specifically in developing vessels and fiber cells, and FRA8 is targeted to …	FRA8,IRX7	0.561692714084129	2.39877702453201e-06
AT2G28200	C2H2-type zinc finger family protein;(source:Araport11)	NA	1.0386243685411	2.71262476889809e-19
AT2G28270	Cysteine/Histidine-rich C1 domain family protein;(source:Araport11)	NA	1.71987982560024	0.0136839272107993
AT2G28290	Encodes a SWI2/SNF2-like protein in the SNF2 subclass. Homozygous plants with null mutations exhibit premature termination of the meristem and carpelloid structures from the inflorescence meristem. Co-activator of floral homeotic gene expression. Acts with LFY to regulate shoot apical meristem identity. Required for meristem maintenance. Regulates flowering under a non-inductive photoperiod. It p…	CHR3,SYD	0.372755615011264	1.24313431791265e-08
AT2G28315	UXT1 is a member of the NST-KT subfamily of nucleotide/sugar transporters. It is localized to the golgi and ER. UXT1 functions as a UDP-Xyl transporter. The mRNA is cell-to-cell mobile.	UXT1	0.571611887838111	0.00718449503020505
AT2G28350	Involved in root cap cell differentiation.	ARF10	0.663067991780168	1.5251517776631e-11
AT2G28360	SIT4 phosphatase-associated family protein;(source:Araport11)	NA	0.683298448865184	1.76518349901128e-10
AT2G28370	Uncharacterized protein family (UPF0497);(source:Araport11)	CASPL5A2	0.476941891152564	3.76102889386371e-08
AT2G28400	senescence regulator (Protein of unknown function, DUF584);(source:Araport11)	NA	2.69375782189946	2.68419346122396e-08
AT2G28460	Cysteine/Histidine-rich C1 domain family protein;(source:Araport11)	NA	0.700013574791531	0.00135127234155809
AT2G28570	hypothetical protein;(source:Araport11)	NA	2.03967239312054	4.7265188061469e-15
AT2G28630	Encodes KCS12, a member of the 3-ketoacyl-CoA synthase family involved in the biosynthesis of VLCFA (very long chain fatty acids).	KCS12	2.52610166370876	1.30431239173866e-38
AT2G28670	Encodes a protein of unknown function that is involved in formation of the casparian strip. ESB1 is localized to the casparian strip and this localization is depended on CASP1 and 2. esb1 mutants have increased levels of suberin, disordered casparian strip and altered levels of several ions in their leaves.	ESB1	1.89737742139329	8.46935466594875e-73
AT2G28760	Encodes a cytosolic isoform of UDP-glucuronic acid decarboxylase.	UXS6	0.416492222950902	0.0203559778997112
AT2G28780	P-hydroxybenzoic acid efflux pump subunit;(source:Araport11)	NA	3.49309695762371	1.31242395980277e-207
AT2G28790	Pathogenesis-related thaumatin superfamily protein;(source:Araport11)	NA	0.489331204410162	0.000109299222515622
AT2G28830	Encodes a U-box E3 ubiquitin ligase involved in ubiquitination of pattern recognition receptor FLS2.pub12/pub13 double mutants enhanced chitin-induced ROS production and callose deposition suggesting they function redundantly to negatively regulate immune response to fungal elicitor.	AtPUB12,PUB12	0.746952544476534	0.000127800527871298
AT2G28840	Putative E3 Ub protein ligase; regulates thermoresponsive hypocotyl growth through mediating degradation of the thermosensor ELF3.	XBAT31	2.03757045400686	1.32140340493734e-163
AT2G28850	member of CYP710A	CYP710A3	5.15486250661619	0.00118059411321491
AT2G28860	member of CYP710A	CYP710A4	0.720227340479195	1.24976132392762e-05
AT2G28890	Encodes a protein phosphatase 2C like gene, similar to POL. Involved in leaf development. Knockout mutants have abnormally shaped leaves.	PLL4	0.698708687674413	1.02604163512515e-16
AT2G28910	Encodes a CAX-interacting protein (CXIP4). The gene product is located in the nucleus of GFP-CXIP4-expressing yeast cells. When transiently expressed in the tobacco leaves, GFP-CXIP4 locates to the nucleus as well as in discrete areas of the cytoplasm (which do not overlap with mitochondria).	CXIP4	1.02167155159909	2.43929161227228e-19
AT2G28940	Protein kinase superfamily protein;(source:Araport11)	NA	0.97957813906049	6.83886558694817e-07
[truncated: 3,970 more rows]

## Sheet: Down
GeneID	Description	Aliases	Log2FC	AdjustPvalue
AT1G01060	LHY encodes a myb-related putative transcription factor involved in circadian rhythm along with another myb transcription factor CCA1	LHY,LHY1	-2.71960504920509	1.71869958064377e-200
AT1G01080	RNA-binding (RRM/RBD/RNP motifs) family protein;(source:Araport11)	NA	-0.878613098979834	1.01558401874866e-13
AT1G01090	pyruvate dehydrogenase E1 alpha subunit	PDH-E1_ALPHA	-0.409807996227059	1.25576734698652e-08
AT1G01180	S-adenosyl-L-methionine-dependent methyltransferases superfamily protein;(source:Araport11)	NA	-0.637405873349341	8.46402157157705e-08
AT1G01190	cytochrome P450, family 78, subfamily A, polypeptide 8;(source:Araport11)	CYP78A8	-2.69533730642643	1.66414575641454e-14
AT1G01210	DNA-directed RNA polymerase, subunit M, archaeal;(source:Araport11)	NA	-0.584380855082416	0.0027691382173343
AT1G01220	Encodes a bifunctional enzyme that has both L-fucokinase and GDP-L-fucose pyrophosphorylase activities. It catalyzes the two steps of the L-fucose salvage pathway for the generation of activated GDP-L-fucose. This pathway seems to be of minor importance for cell wall polysaccharide biosynthesis compared to the de novo GDP-L-fucose biosynthesis pathway in Arabidopsis.	AtFKGP,FKGP	-0.269227402690531	0.00974582120031762
AT1G01320	Encodes REDUCED CHLOROPLAST COVERAGE 1 (REC1) a protein with similarity to the FLOURY locus in maize. Located in the nucleus and cytosol. Contributes to establishing the size of the chloroplast compartment.	REC1	-0.260504653962119	0.00679600007880453
AT1G01420	Phosphatidylinositol 4-phosphate 5-kinase (PIP5K) enzyme family member.	UGT72B3	-3.18054832450879	2.89709803271716e-48
AT1G01430	Encodes a member of the TBL (TRICHOME BIREFRINGENCE-LIKE) gene family containing a plant-specific DUF231 (domain of unknown function) domain. TBL gene family has 46 members, two of which (TBR/AT5G06700 and TBL3/AT5G01360) have been shown to be involved in the synthesis and deposition of secondary wall cellulose, presumably by influencing the esterification state of pectic polymers.Functions as a …	MOAT3,TBL25	-1.38491985628899	4.26372455167792e-54
AT1G01453	HeLo domain-containing mixed lineage kinase domain-like protein (MLKL). A pseudokinase, mediates necroptotic cell death in animals.	NA	-2.00870416748598	2.80101199236549e-06
AT1G01500	Erythronate-4-phosphate dehydrogenase family protein;(source:Araport11)	NA	-0.372514212884082	0.0195185601675933
AT1G01520	RVE3 is one of eleven homologous MYB-like transcription factors in Arabidopsis and a member of the RVE8 clade. Plays a minor role in clock regulation.	ASG4,REV3	-3.9347722775965	3.57375246432179e-31
AT1G01540	Protein kinase superfamily protein;(source:Araport11)	NA	-0.57471245896273	3.61873439927282e-09
AT1G01610	bifunctional sn-glycerol-3-phosphate 2-O-acyltransferase/phosphatase. Involved in cutin assembly and is functionally redundant with GPAT8.	ATGPAT4,GPAT4	-0.836424892995634	1.1080642784389e-17
AT1G01630	Sec14p-like phosphatidylinositol transfer family protein;(source:Araport11)	NA	-1.03835760723352	6.21684667835317e-18
AT1G01710	acyl-CoA thioesterase II;(source:Araport11)	NA	-0.274021739636946	0.00764444122378949
AT1G01740	kinase with tetratricopeptide repeat domain-containing protein;(source:Araport11)	BSK4	-0.520725287410629	0.0433750332511066
AT1G01750	actin depolymerizing factor 11;(source:Araport11)	ADF11	-0.934809776305371	3.83836365388989e-05
AT1G01790	Encodes a member of the cation/proton antiporters-2 antiporter superfamily, the K efflux antiporter KEA1 that is localized to the chloroplast envelope.	ATKEA1,KEA1	-1.36465853184189	3.31401803927949e-73
AT1G01860	dimethyladenosine transferase	PFC1	-0.472338591757323	0.00792586284328492
AT1G01970	Tetratricopeptide repeat (TPR)-like superfamily protein;(source:Araport11)	NA	-0.7012014481955	1.639859856595e-13
AT1G02000	UDP-D-glucuronate 4-epimerase The mRNA is cell-to-cell mobile.	GAE2	-0.802165353350067	1.48702038621246e-15
AT1G02020	nitroreductase family protein;(source:Araport11)	NA	-0.558900056202736	1.93778742629356e-06
AT1G02090	encodes a phosphoprotein that is a subunit of the COP9 signalosome. Mutants exhibit constitutive photomorphogenic phenotype.	ATCSN7,COP15,CSN7,FUS5	-0.778893951549755	1.52487334382424e-16
AT1G02130	Belongs to the Rab1 GTPase subfamily. This small GTP-binding protein is required in ER to Golgi transportation.	ARA-5,ARA5,ATRAB1B,ATRABD2A,RA-5,RABD2A	-0.267031764195868	0.0152437642867766
AT1G02170	Encodes a type I metacaspase. Two Arabidopsis metacaspases, AT1G02170 (MC1) and AT4G25110 (MC2) antagonistically control programmed cell death in Arabidopsis. MC1 is a positive regulator of cell death and requires conserved caspase-like putative catalytic residues for its function. MC2 negatively regulates cell death. This function is independent of the putative catalytic residues. A third type I…	ATMC1,AtMCP1b,ATMCPB1,LOL3,MC1,MCP1b	-0.325667725670856	0.000477532110157393
AT1G02220	NAC domain transcription factor which functions as a negative regulator of the TDIF-PXY module and fine-tunes TDIF signaling in vascular development. Controls the balance of xylem formation and cambial cell divisions.	ANAC003,NAC003	-0.560280239484733	0.00158293285174761
AT1G02270	Calcium-binding endonuclease/exonuclease/phosphatase family;(source:Araport11)	NA	-0.464158792730321	0.000270265133301662
AT1G02380	transmembrane protein;(source:Araport11)	NA	-2.00008474600586	9.78445756027941e-07
AT1G02390	putative sn-glycerol-3-phosphate 2-O-acyltransferase	ATGPAT2,GPAT2	-1.75482978455855	1.92723898180524e-09
AT1G02475	Polyketide cyclase/dehydrase and lipid transport superfamily protein;(source:Araport11)	NA	-1.5709619300133	2.85438233424336e-22
AT1G02560	One of several nuclear-encoded ClpPs (caseinolytic protease). Contains a highly conserved catalytic triad of Ser-type proteases (Ser-His-Asp). The name reflects nomenclature described in Adam et. al (2001). The mRNA is cell-to-cell mobile.	CLPP5,NCLPP1,NCLPP5	-1.5439604817936	1.51111573646279e-75
AT1G02705	hypothetical protein;(source:Araport11)	NA	-2.64902825140705	1.4783849454841e-11
AT1G02720	Encodes a protein with putative galacturonosyltransferase activity.	AtGATL5,GATL5	-0.888893757179395	1.76228797164872e-11
AT1G02730	Encodes a gene similar to cellulose synthase. Knock-out mutant has reduced growth, reduced xylan level and reduced xylan synthase activity in stems.It's expression is cell cycle dependent and it appears to function in cell plate formation.	ATCSLD5,CSLD5,CSLD5,SOS6	-0.802765888881868	2.01151307982876e-19
AT1G02820	Late embryogenesis abundant 3 (LEA3) family protein;(source:Araport11)	AtLEA3,LEA2,LEA3	-3.91747446807047	4.85792795917727e-21
AT1G02860	Encodes a ubiquitin E3 ligase with RING and SPX domains that is involved in mediating immune responses and mediates degradation of PHT1s at plasma membranes. Targeted by MIR827. Ubiquitinates PHT1;3, PHT1;2, PHT1;1/AtPT1 and PHT1;4/AtPT2.	BAH1,NLA,SYG1	-0.238482394290815	0.0481141820019042
AT1G02870	nucleolar-like protein;(source:Araport11)	NA	-0.872034832632846	1.03190586686957e-07
AT1G02880	Encodes a thiamine pyrophosphokinase capable of producing thiamine pyrophosphate from free thiamine.	TPK1	-0.931819867272102	6.55759102364863e-14
AT1G02910	Mutants defective in this gene were shown to have a reduced PSII content (overall reduction in the levels of several PSII subunits) and a disrupted grana stack structure. The N-terminal half of the protein contains two tetratricopeptide repeat (TPR) motifs that are arranged tandemly, each consisting of a 34-residue degenerate consensus sequence. The N-terminal sequence is rich in positive and hyd…	LPA1	-1.01525590869213	3.01865197950248e-18
AT1G02930	Encodes glutathione transferase belonging to the phi class of GSTs. Naming convention according to Wagner et al. (2002).	ATGST1,ATGSTF3,ATGSTF6,ERD11,GST1,GSTF6	-2.76512862071875	1.92190949050884e-61
AT1G02940	Encodes glutathione transferase belonging to the phi class of GSTs. Naming convention according to Wagner et al. (2002).	ATGSTF5,GSTF5	-3.97713072087044	0.0457502771595642
AT1G02970	Protein kinase that negatively regulates the entry into mitosis.	ATWEE1,WEE1	-0.650671076119307	0.0484983301367963
AT1G03040	Governs the competence of pericycle cells to initiate lateral root primordium formation.	NA	-0.286101556062948	0.00702631841541266
AT1G03055	Encodes the ortholog of rice D27. It is plastid-localized and is required for the inhibition of secondary bud outgrowth and operates on a nonmobile precursor upstream of MAX1 in the SL biosynthesis pathway.	AtD27,D27	-7.90406237932253	2.37003049531334e-10
AT1G03070	Bax inhibitor-1 family protein;(source:Araport11)	AtLFG4,LFG4	-0.900049684217371	0.000293626840690941
AT1G03110	Encodes a gene involved in the modification of nucleosides in tRNA. Mutants have no 7-methylguanosine.	AtTRM82,TRM82	-0.796250114036857	5.45520479742951e-09
AT1G03130	Encodes a protein predicted by sequence similarity with spinach PsaD to be photosystem I reaction center subunit II (PsaD2)	PSAD-2	-2.42102179578382	2.01323772262907e-152
AT1G03150	Acyl-CoA N-acyltransferases (NAT) superfamily protein;(source:Araport11)	NA	-0.39980161507644	0.0452817015988954
AT1G03160	A new plant-specific member of the dynamin superfamily; defines a new protein class within the dynamin superfamily of membrane remodeling GTPases that regulates organization of the thylakoid network in plants. Targeted to chloroplasts and associated with thylakoid and envelope membranes as punctate structures. Knockout mutants have abnormalities in chloroplast and thylakoid morphology, including …	FZL	-0.233234223048873	0.0265847528081865
AT1G03220	Eukaryotic aspartyl protease family protein;(source:Araport11)	NA	-1.06712627029065	3.56050321535912e-33
AT1G03250	R3H domain protein involved in ribosome biogenesis.	NA	-0.869155415507614	1.55518390735062e-09
AT1G03310	Encodes a protein with strong similarity to isoamylase (EC:3.2.1.68) however lacks critical residues known to be important for activity. Appears to co localize with ISA1 in the chloroplast isoamylase complex. Mutations in this gene cause the loss of detectable isoamylase activity and the disruption of normal starch structure. It has been postulated that AtISA2 interacts with AtISA1 to form the Is…	AtBE2,ATISA2,BE2,DBE1,ISA2	-2.09439807213891	1.40700323568059e-85
AT1G03400	A single copy gene that encodes a protein with sequence similarity to tomato E8 (ACC oxidase, the last step in ethylene biosynthesis) involved in ethylene synthesis and fruit ripening in tomato. This gene is not induced by ethylene in siliques. The transcript is found in siliques, etiolated seedlings, leaves, stems and flowers.	NA	-2.16137777834389	8.92842566275186e-35
AT1G03410	2-oxoglutarate (2OG) and Fe(II)-dependent oxygenase superfamily protein;(source:Araport11)	2A6	-0.567407228204341	0.000480178104909682
AT1G03440	Leucine-rich repeat (LRR) family protein;(source:Araport11)	NA	-1.29849680583338	5.7696997214804e-31
AT1G03475	Encodes coproporphyrinogen III oxidase, a key enzyme in the biosynthetic pathway of chlorophyll and heme, a tetrapyrrole pathway. Mutants express cytological and molecular markers associated with the defense responses, usually activated by pathogen infection.	ATCPO-I,HEMF1,LIN2	-0.871966474611594	7.60572825083623e-23
AT1G03495	HXXXD-type acyl-transferase family protein;(source:Araport11)	NA	-6.20635831260531	1.87692733516395e-35
AT1G03530	nuclear assembly factor 1;(source:Araport11)	ATNAF1,NAF1	-0.539970249726756	1.52134236614063e-05
AT1G03600	PSB27 is a chloroplast lumen localized protein that is involved in adaptation to changes in light intensity.	PSB27	-1.64285383146949	3.39062539542333e-87
AT1G03630	Encodes for a protein with protochlorophyllide oxidoreductase activity. The enzyme is NADPH- and light-dependent.	POR_C,PORC	-3.27501207825018	1.02134064991419e-269
AT1G03680	Encodes a m-type thioredoxin (Trx-m1) localized in chloroplast stroma.	ATHM1,ATM1,THM1,TRX-M1	-2.10084020333835	3.21202651714671e-157
AT1G03780	Homolog of vertebrate TPX2. Protein has three domains involved in nuclear targeting, one in nuclear export and two in microtubule binding. Involved in mitotic spindle assembly during late prophase and early prometaphase.	AtTPX2,TPX2	-0.49951423216731	0.00532202366478653
AT1G03820	E6-like protein;(source:Araport11)	NA	-0.974331829703972	0.00293986405189396
AT1G03860	prohibitin 2	ATPHB2,PHB2	-0.490825597027989	6.3228896621272e-07
AT1G03930	Phosphorylates serine, threonine, and tyrosine	ADK1,CKL9ALPHA,CKL9BETA	-0.318982919036889	0.000930025497671136
AT1G03940	HXXXD-type acyl-transferase family protein;(source:Araport11)	NA	-4.43562235153312	3.37474467704925e-41
AT1G04020	Encodes a protein containing two tandem BRCA1 C-Terminal (BRCT) domains, which function in phosphorylation-dependent protein-protein interactions. Loss of function mutations cause defects in meristem organization due to failure to repress WUS. BARD1 binds to WUS promoter and over expression of BARD reduces the extent of WUS expression.	ATBARD1,BARD1,ROW1	-0.872612748301743	1.01362067709436e-07
AT1G04110	Initially identified as a mutation affecting stomatal development and distribution. Encodes a protein similar to serine proteases.	AtSDD1,SDD1	-2.68769344376685	1.81079077117705e-37
AT1G04170	protein synthesis initiation factor eIF2 gamma The mRNA is cell-to-cell mobile.	EIF2_GAMMA	-0.176828041499825	0.0207732804495002
AT1G04200	dyggve-melchior-clausen syndrome protein;(source:Araport11)	NA	-0.298441720997321	0.00890392063938002
AT1G04260	Encodes protein that interacts with CaMV movement protein. Colocalizes in the cytoplasm with the movement protein. Has similarity to mammalian proteins (such as the rat PRA1) which have been described as rab acceptors.	MPI7,MPIP7,PRA1.D	-0.440856539891546	0.00011612439498612
AT1G04290	Thioesterase superfamily protein;(source:Araport11)	NA	-1.76678624252988	2.57433878274389e-35
AT1G04350	encodes a protein whose sequence is similar to 2-oxoglutarate-dependent dioxygenase	NA	-3.41244679297916	1.39379708609432e-115
AT1G04360	RING/U-box superfamily protein;(source:Araport11)	ATL1	-0.442596910681746	0.0337137100097204
AT1G04420	NAD(P)-linked oxidoreductase superfamily protein;(source:Araport11)	NA	-0.640775173064655	5.17039612053819e-11
AT1G04520	Encodes a plasmodesmal protein that may be involved in the intercellular movement of molecules through the plasmodesmata.	PDLP2	-1.19785381927873	1.86238672493268e-11
AT1G04530	Encodes one of the 36 carboxylate clamp (CC)-tetratricopeptide repeat (TPR) proteins (Prasad 2010, Pubmed ID: 20856808) with potential to interact with Hsp90/Hsp70 as co-chaperones.	TPR4	-0.498882266229914	0.000354771457485405
AT1G04570	Similar to plastid solute transporters.	NA	-0.75158938610146	0.0318707565110214
AT1G04640	Lipoyltransferase, located in mitochondria but not found in chloroplasts	LIP2	-1.54915670986135	2.70390992798188e-30
AT1G04650	FLIP is a member of a conserved gene family with wide distribution across taxa. In Arabidopsis, it forms a complex with FIGL1 regulates meiotic crossover formation via RAD51 and DMC1.	FLIP	-1.70911383120725	2.28526335427502e-13
AT1G04710	EC2.3.1.16 thiolase. Its transcript levels change after inducing MUTE expression in a mute background.	KAT1,PKT4	-0.837990903095011	2.53264878891546e-05
AT1G04730	Necessary for sister chromatid cohesion. Acts in synergy with ETG1.	CTF18	-0.503537623870872	0.0186626587858395
AT1G04760	member of Synaptobrevin -like protein family	ATVAMP726,VAMP726	-0.685772759503349	0.0299825222878185
AT1G04880	Encodes a ARID-HMG DNA-binding protein that functions in pollen tube growth through the regulation of gene expression by interacting with the transcription factors AGL66 and AGL104.	AtHMGB15,HMGBD15	-2.47331977903071	7.59159106134441e-07
AT1G04900	NADH dehydrogenase ubiquinone complex I, assembly factor-like protein (DUF185);(source:Araport11)	NA	-0.595994024623244	0.00194731289089798
AT1G04940	Tic20 is believed to function as a component of the protein-conducting channel at the inner envelope membrane. Genes AT1G04940 and AT1G04945 were switched for the TAIR7 genome release to give consistency with MIPs annotation. The Arabidopsis genome encodes four Tic20 homologous proteins, AT1G04940(Tic20-I), AT2G47840(Tic20-II), AT4G03320(Tic20-IV) and AT5G55710(Tic20-V).	atTIC20,AtTic20-I,TIC20,Tic20-I	-0.937455493148083	2.03298455287268e-25
AT1G04945	HIT-type Zinc finger family protein;(source:Araport11)	NA	-1.12145122219924	1.36598545745481e-09
AT1G05057	U2;(source:Araport11)	U2-14	-0.580443251478916	0.000368318893824937
AT1G05060	coiled-coil protein;(source:Araport11)	NA	-0.756639817522866	3.23494030680407e-06
AT1G05070	transmembrane protein, putative (DUF1068);(source:Araport11)	NA	-0.911353108581544	1.04183338532799e-12
AT1G05140	Peptidase M50 family protein;(source:Araport11)	NA	-1.14245344035978	7.88553687415117e-39
AT1G05190	Encodes the plastid 50S ribosomal protein L6.	EMB2394,RPL6	-0.247755888817375	0.0261026161430952
AT1G05200	Encodes a putative glutamate receptor GLR3 with dual localization in plastid and plasma membrane.	ATGLR3.4,GLR3.4,GLUR3	-1.42790712931194	4.35477102096693e-46
AT1G05210	Transmembrane protein 97, Putative;(source:Araport11)	NA	-0.690499006490627	0.0110806049590656
AT1G05230	Encodes a homeobox-leucine zipper family protein belonging to the HD-ZIP IV family. Mutants have trichomes that appear glass-like under a dissecting microscope as compared to the wild-type trichomes. The mutations do not affect trichome growth or branch number.	HDG2	-0.543468639067607	8.66134130048491e-07
AT1G05250	Encodes a cationic cell-wall-bound peroxidase homolog that is involved in the lignification of cell walls. Regulated by COG1, involved in seed longevity.	AtPRX1,PRX2	-1.43206231156045	3.08039272853337e-05
AT1G05300	member of Fe(II) transporter isolog family	ZIP5	-0.885909056180274	1.94028017310555e-05
AT1G05333	Natural antisense transcript overlaps with AT1G17810;(source:Araport11)	NA	-0.602041461021092	3.87730337394457e-07
AT1G05340	cysteine-rich TM module stress tolerance protein;(source:Araport11)	AthCYSTM1	-1.09965847647024	4.02358318869897e-06
AT1G05430	Hypothetical protein, expression induced by Al.	NA	-0.644559914176541	1.37252135865846e-06
AT1G05460	Encodes a protein with similarity to RNA helicases. Mutants are defective in post-transcriptional gene silencing.	SDE3	-0.368935805867906	0.023401963107865
AT1G05540	hypothetical protein (DUF295);(source:Araport11)	NA	-2.83865682608194	3.80721632005823e-06
AT1G05560	A UDP-glucose transferase localized in the phragmoplast. It has been co-purified with the callose synthase complex and may transfer UDP-glucose from sucrose synthase to the callose synthase and thus help form a substrate channel for the synthesis of callose at the forming cell plate. Induced by salicylic acid. Independent of NPR1 for their induction by salicylic acid. UGT1 encodes a protein with …	UGT1,UGT75B1	-1.13772004542144	4.33842748541385e-17
AT1G05562	Natural antisense transcript overlaps with AT1G05560;(source:Araport11)	NA	-1.65356223716403	3.1858778701461e-35
AT1G05590	Encodes a protein with &	ATHEX3,HEXO2	-0.327827493190184	0.00912837315490063
AT1G05630	Encodes an inositol polyphosphate 5-phosphatase with phosphatase activity toward only Ins(1,4,5)P3. Induced in response to ABA and wounding treatments. Expressed in young seedlings and flowers, while no transcripts were detectable in maturated roots, stems, and rosette leaves Modulates the development of cotyledon veins through its regulation of auxin homeostasis. Involved in blue light light?sti…	5PTASE13,AT5PTASE13	-0.787439803070857	5.63361632812873e-10
AT1G05680	Encodes a UDP-glucosyltransferase, UGT74E2, that acts on IBA (indole-3-butyric acid) and affects auxin homeostasis. The transcript and protein levels of this enzyme are strongly induced by H2O2 and may allow integration of ROS (reactive oxygen species) and auxin signaling. This enzyme can also transfer glycosyl groups to several compounds related to the explosive TNT when this synthetic compound …	UGT74E2	-1.95675694772886	8.35225990912445e-10
AT1G05690	BTB and TAZ domain protein. Acts redunantly with BT1 and BT2 during female gametophyte development. Acts with BT2 during male gametophyte development.	BT3	-2.24634751378024	1.2384946080773e-14
AT1G05710	basic helix-loop-helix (bHLH) DNA-binding superfamily protein;(source:Araport11)	NA	-0.469303734379134	0.0335767822257119
AT1G05850	Encodes an endo chitinase-like protein AtCTL1. Essential for tolerance to heat, salt and drought stresses. Also involved in root hair development, cell expansion and response to cytokinin. Allelic to erh2. 11 alleles described in Hauser (1995). Mutant is defective in acquired thermotolerance, appears semidwarf throughout its life cycle and has extra lateral branches. There are two EMS alleles. Ex…	ATCTL1,CTL1,ELP,ELP1,ERH2,HOT2,POM1	-1.07010331303034	1.5584521132992e-26
AT1G05870	hypothetical protein (DUF1685);(source:Araport11)	NA	-0.314042775551655	0.00220623254369276
AT1G05900	endonuclease III 2;(source:Araport11)	ATNTH2,NTH2	-1.27334397646478	8.42475478216834e-13
AT1G05910	Encodes an acetylated histone-binding protein BRAT1. BRAT1 forms a complex with BRP1 to prevent transcriptional silencing.	BRAT1	-0.237404115169564	0.0138032619811196
AT1G05940	Encodes a member of the cationic amino acid transporter (CAT) subfamily of amino acid polyamine choline transporters.	CAT9	-0.95417532868013	2.19981871496086e-36
AT1G06000	encodes a flavonol-7-O-rhamnosyltransferase involved in the formation of rhamnosylated flavonols	UGT89C1	-2.62388750679785	1.11582183297696e-96
AT1G06040	Encodes salt tolerance protein (STO) which confers salt tolerance to yeast cells. Fully complements calcineurin deficient yeast but does not encode a phosphoprotein phosphatase. Sequence has similarities to CONSTANS. STO co-localizes with COP1 and plays a role in light signaling.STO transcript levels are regulated by photoperiod and phtyohormones. STO competes with FLC in the regulation of floral…	BBX24,STO	-2.78628566167002	2.84650684306978e-177
AT1G06100	Fatty acid desaturase family protein;(source:Araport11)	NA	-7.43448873214141	2.35332513801794e-08
AT1G06143	basic helix loop helix DNA-binding superfamily protein;(source:Araport11)	NA	-1.05301604451389	4.00818182557913e-05
AT1G06177	None;(source:Araport11)	NA	-1.33266014222506	0.000142069638364661
AT1G06180	member of MYB3R- and R2R3- type MYB- encoding genes	ATMYB13,ATMYBLFGN,MYB13	-2.52830969628186	8.61889708806765e-26
AT1G06190	Encodes a novel ribonucleic acid-binding protein that interacts with the endonuclease RNase E and supports its function in processing plastid ribonucleic acids.	RHON1	-0.626543012227579	6.837708946534e-11
AT1G06220	Encodes a protein with similarity to splicing factor Snu114. Snu114 is thought to be involved in activation of the splicosome. Loss of GFA1 function results in reduced female fertility. Approximately 50% of ovules abort due to defects in the female gametophyte. In mutant gametophytes antipodal cells express egg cell markers suggesting a defect in specification of cell fate.GFA1 is also required t…	CLO,GFA1,MEE5	-0.379069967424006	2.61703564658751e-07
AT1G06240	diiron containing four-helix bundle family ferritin protein, putative (Protein of unknown function DUF455);(source:Araport11)	NA	-1.76622576787179	1.54296713359587e-33
AT1G06270	Pentatricopeptide repeat (PPR) superfamily protein;(source:Araport11)	NA	-1.28772988621593	4.94619971910013e-14
AT1G06380	Ribosomal protein L1p/L10e family;(source:Araport11)	NA	-0.851637706846546	1.94808546812007e-07
AT1G06430	encodes a FtsH protease that is localized to the chloroplast	FTSH8	-1.80504228846339	2.84385178929022e-94
AT1G06460	ACD32.1 encodes an alpha-crystallin domain containing protein with homology to small heat shock proteins.	ACD31.2,ACD32.1	-0.431943784610003	4.29171809639821e-05
AT1G06640	encodes a protein whose sequence is similar to a 2-oxoglutarate-dependent dioxygenase The mRNA is cell-to-cell mobile.	NA	-0.950024406185456	2.27357844551171e-15
AT1G06645	2-oxoglutarate (2OG) and Fe(II)-dependent oxygenase superfamily protein;(source:Araport11)	NA	-1.26243621674669	4.89833720461089e-08
AT1G06650	encodes a protein whose sequence is similar to 2-oxoglutarate-dependent dioxygenase The mRNA is cell-to-cell mobile.	NA	-1.57987143417633	3.2820463768273e-53
AT1G06680	Encodes a 23 kD extrinsic protein that is part of photosystem II and participates in the regulation of oxygen evolution. Phosphorylation of this protein is dependent on calcium. In plsp1-1 mutant plastids, the nonmature form of the protein localizes in the stroma. The mRNA is cell-to-cell mobile.	OE23,OEE2,PSBP-1,PSII-P	-2.31439815335898	2.53113448737412e-219
AT1G06690	NAD(P)-linked oxidoreductase superfamily protein;(source:Araport11)	NA	-2.10651813924558	2.85319887989347e-65
AT1G06720	P-loop containing nucleoside triphosphate hydrolases superfamily protein;(source:Araport11)	NA	-0.500267733852912	4.05082152409153e-05
AT1G06730	pfkB-like carbohydrate kinase family protein;(source:Araport11)	NA	-0.613245391741206	1.23441293791488e-06
AT1G06790	Encodes a subunit of RNA polymerase III involved in maintaining global RNA homeostasis, not just that of genes transcribed by RNA pol III.	NRPC7	-0.515914072916477	0.0195754549651915
AT1G06820	Encodes carotenoid isomerase. Catalyzes the isomerization of poly-cis-carotenoids to all-trans-carotenoids. Together with PDS and ZDS, CRTiso is required to complete the synthesis of lycopene from phytoene.	CCR2,CRTISO	-0.807991326569152	6.85156524598191e-14
AT1G06830	Encodes a member of the CC-type glutaredoxin (ROXY) family that has been shown to interact with the transcription factor TGA2. CEPD1 is a non secreted polypeptide that is highly similar to CEPD2 which is another member of a novel family related to glutaredoxins. It is induced by nitrogen starvation. It acts downstream of the CEP1 peptide in systemic N-demand signalling .The RNA is expressed in th…	CEPD1,ROXY6	-1.65299579473365	0.0329940083153803
AT1G06870	Peptidase S24/S26A/S26B/S26C family protein;(source:Araport11)	Plsp2A	-0.397245119672957	0.000193598337798317
AT1G06950	Encodes a protein thought to be a part of the translocon at the chloroplast inner envelope. Involved in protein import into the chloroplast and chloroplast biogenesis. C-terminal half of Tic110 functions as scaffolds for protein-protein interactions.	ATTIC110,TIC110	-0.744679260824534	6.76825123820531e-26
AT1G07010	Calcineurin-like metallo-phosphoesterase superfamily protein;(source:Araport11)	AtSLP1,SLP1	-2.8025935982183	2.32034940228109e-117
AT1G07030	Mitochondrial substrate carrier family protein;(source:Araport11)	NA	-0.279955583885196	0.0204889580155647
AT1G07080	Thioredoxin superfamily protein;(source:Araport11)	NA	-0.932156016399843	8.89601398072502e-29
AT1G07128	Natural antisense transcript overlaps with AT1G07130;(source:Araport11)	NA	-1.46697919545391	1.01150813347873e-06
AT1G07150	Member of MEKK subfamily. Involved in wound induced signaling where it interacts with At5g40440, and activates At1g59580.	MAPKKK13	-0.721789567605135	5.89652955020812e-06
AT1G07180	Internal NAD(P)H dehydrogenase in mitochondria. The predicted protein sequence has high homology with other designated NAD(P)H DHs from microorganisms; the capacity for matrix NAD(P)H oxidation via the rotenone-insensitive pathway is significantly reduced in the Atndi1 mutant plant line; the in vitro translation product of AtNDI1 is imported into isolated mitochondria and located on the inside of…	ATNDI1,NDA1	-9.97330449672903	2.07799657752045e-60
AT1G07210	Ribosomal protein S18;(source:Araport11)	NA	-0.561145283535273	1.1501525339573e-05
AT1G07220	O-glucosyltransferase rumi-like protein (DUF821);(source:Araport11)	NA	-0.56444562643945	7.00366636639154e-05
AT1G07250	UDP-glucosyl transferase 71C4;(source:Araport11)	UGT71C4	-1.67807462414618	6.00416963824731e-102
AT1G07280	Tetratricopeptide repeat (TPR)-like superfamily protein;(source:Araport11)	NA	-2.42573443111888	3.08510553447161e-103
AT1G07310	Calcium-dependent lipid-binding (CaLB domain) family protein;(source:Araport11)	NA	-0.249904934688173	0.0150158070654371
AT1G07330	dentin sialophosphoprotein;(source:Araport11)	NA	-3.43943443816015	0.000168038677268876
AT1G07370	Encodes putative proliferating cell nuclear antigen involved in cell cycle regulation. May be sumoylated.	ATPCNA1,PCNA1	-0.525694642204385	0.00679600007880453
AT1G07400	HSP20-like chaperones superfamily protein;(source:Araport11)	NA	-1.4608112284407	6.1883321094062e-05
AT1G07420	Arabidopsis thaliana sterol 4-alpha-methyl-oxidase mRNA. The sterol 4alpha-methyl oxidase2 family proteins SMO2-1 and SMO2-2 function partially through effects on auxin accumulation, auxin response and PIN1 expression to regulate embryogenesis in Arabidopsis.	ATSMO1,SMO2-1	-0.800484631637163	1.29516526795901e-13
AT1G07450	NAD(P)-binding Rossmann-fold superfamily protein;(source:Araport11)	NA	-8.66380870216451	6.25350709825294e-12
AT1G07490	ROTUNDIFOLIA like 3;(source:Araport11)	DVL9,RTFL3	-2.30744270717125	0.000132417606053432
AT1G07500	SMR5 is a member of the SIAMESE-RELATED Cyclin-Dependent Kinase Inhibitor family. It is induced by ROS/oxidative stress.	SMR5	-5.89873725218556	2.09082510215333e-05
AT1G07510	encodes an FtsH protease that is localized to the mitochondrion	AtFTSH10,FTSH10	-0.731753355466904	1.46445062381424e-12
AT1G07590	Tetratricopeptide repeat (TPR)-like superfamily protein;(source:Araport11)	NA	-0.486163685314281	5.29151644627178e-05
AT1G07700	Thioredoxin superfamily protein;(source:Araport11)	NA	-2.35872877171111	3.02911771705551e-66
AT1G07705	NOT2 / NOT3 / NOT5 family;(source:Araport11)	NOT2a	-0.221455888248577	0.032912742333089
AT1G07720	Encodes KCS3, a member of the 3-ketoacyl-CoA synthase family involved in the biosynthesis of VLCFA (very long chain fatty acids).	KCS3	-0.912443635523085	3.44269137988499e-12
AT1G07880	member of MAP Kinase	ATMPK13	-0.844330145060231	0.0062783868288732
AT1G07890	Encodes a cytosolic ascorbate peroxidase APX1. Ascorbate peroxidases are enzymes that scavenge hydrogen peroxide in plant cells. Eight types of APX have been described for Arabidopsis: three cytosolic (APX1, APX2, APX6), two chloroplastic types (stromal sAPX, thylakoid tAPX), and three microsomal (APX3, APX4, APX5) isoforms. At least part of the induction of heat shock proteins during light stres…	APX1,ATAPX01,ATAPX1,CS1,MEE6	-0.863916455778914	1.4493972637894e-24
AT1G07897	None;(source:Araport11)	NA	-1.54786863743421	0.00641084093657051
AT1G07930	GTP binding Elongation factor Tu family protein;(source:Araport11)	NA	-0.375203439571091	3.74823131400666e-06
AT1G07940	GTP binding Elongation factor Tu family protein;(source:Araport11)	NA	-0.232005341752281	0.0161474274647811
AT1G08000	Encodes a member of the GATA factor family of zinc finger transcription factors.	GATA10	-0.685814395028213	5.89617872416807e-06
AT1G08040	trimethylguanosine synthase (DUF707);(source:Araport11)	NA	-0.461180890176685	0.00560457515676776
AT1G08070	Encodes a chloroplast RNA editing factor.	EMB3102,OTP82	-0.633126681146287	0.0283008961177532
AT1G08130	Encodes the Arabidopsis DNA ligase 1 that provides the major DNA ligase activity in cells and plays a key role in both DNA replication and excision repair pathways. In addition, it is an important component of the active DNA demethylation machinery and is indispensable for cell viability. AtLIG1 expresses one major and two minor mRNA transcripts differing only in the length of the 5' untranslated…	ATLIG1,LIG1	-0.641011775341198	1.22048418979077e-11
AT1G08190	Might be involved in protein sorting to the vacuole. The mRNA is cell-to-cell mobile.	ATVAM2,ATVPS41,VAM2,VPS41,ZIP2	-0.392390220208154	1.47304967586742e-06
AT1G08200	Encodes a putative UDP-D-apiose/UPD-D-xylose synthetase.	AXS2	-0.404224428306728	8.97240586536809e-08
AT1G08250	Encodes a plastid-localized arogenate dehydratase involved in phenylalanine biosynthesis. Although this enzyme has sequence similarity to prephenate dehydratases, it is 98 times more active with arogenate than prephenate in enzymatic assays.	ADT6,AtADT6	-0.747922719503672	1.65844613731127e-11
AT1G08260	Similar to POL2A, DNA polymerase epsilon catalytic subunit. Essential for Arabidopsis growth. Null homozygotes are embryo lethal, partial loss of function alleles show embryo patterning defects such as root pole displacement. Delayed progression through cell cycle results in embryos with smaller numbers of larger cells.	ABO4,EMB142,EMB2284,EMB529,ESD7,POL2A,TIL1	-0.222798362922809	0.0430056369014459
AT1G08300	no vein-like protein;(source:Araport11)	NVL	-0.579844905109425	0.00750016641382767
AT1G08370	Encodes DCP1 involved in mRNA decapping. DCP1 forms a mRNA decapping complex with DCP2 (At5g13570) and VCS (VARICOSE) (At3g13300). However, unlike DCP2, DCP1 itself does not have mRNA decapping activity in vitro. DCP1, DCP2 and VCS colocalize in cytoplasmic loci, which are putative Arabidopsis mRNA processing bodies. Null mutants of DCP1, DCP2, and VCS accumulate capped mRNAs with a reduced degra…	ATDCP1,DCP1	-0.450603432905202	1.96516668993954e-06
AT1G08380	Encodes subunit O of photosystem I.	PSAO	-3.3021462020844	0
AT1G08390	Involved in preserving the stability of 45S rDNA repeats.	RMI2	-1.25035050308241	5.71470675875974e-05
AT1G08465	Member of the YABBY family of Arabidopsis proteins involved in the abaxial cell fate specification in lateral organs	YAB2	-0.729449150115325	0.00158608225197223
AT1G08470	Although this enzyme is predicted to encode a strictosidine synthase (SS), it lacks a conserved catalytic glutamate residue found in active SS enzymes and it is not expected to have SS activity.	SSL3	-0.634618533887155	3.46872779019836e-05
AT1G08490	Chloroplastic NifS-like protein that can catalyze the conversion of cysteine into alanine and elemental sulfur (S(0)) and of selenocysteine into alanine and elemental Se (Se(0)). Overexpression enhances selenium tolerance and accumulation.	ATCPNIFS,ATNFS2,ATSUFS,CPNIFS,SUFS	-0.864186499733926	6.56149853545108e-21
AT1G08520	Encodes the CHLD subunit of the Mg-chelatase enzyme involved in chlorophyll biosynthesis. Lines carrying recessive mutations of this locus are white and seedling lethal.	ALB-1V,ALB1,CHLD,PDE166,V157	-0.621475386853826	8.23720602929506e-15
AT1G08530	chitinase-like protein;(source:Araport11)	NA	-0.766301430792948	0.000836909798382554
AT1G08540	Enodes a subunit of chloroplast RNA polymerase, confers the ability to recognize promoter sequences on the core enzyme. SIG1 is induced by red and blue light.	ABC1,ATSIG1,ATSIG2,SIG1,SIG2,SIGA,SIGB	-1.65508819237765	1.09672842837188e-85
AT1G08550	Violaxanthin deepoxidase involved in xanthophyll cycle.Two major consequences of the npq1 mutation are the absence of zeaxanthin formation in strong light and the partial inhibition of the quenching of singlet excited chlorophylls in the photosystem II light-harvesting complex	AVDE1,NPQ1	-0.552257053375312	3.31493396053646e-07
AT1G08570	Encodes a member of the thioredoxin family protein. Located in the chloroplast. Shows high activity towards the chloroplast 2-Cys peroxiredoxin A, and poor activity towards the chloroplast NADP-malate dehydrogenase. The mRNA is cell-to-cell mobile.	ACHT4	-0.927277367883481	5.14335638952933e-25
AT1G08580	hypothetical protein;(source:Araport11)	NA	-0.774283919569169	0.00813123496037663
AT1G08610	Pentatricopeptide repeat (PPR) superfamily protein;(source:Araport11)	NA	-0.748353590322367	2.46054096790637e-06
AT1G08640	Encodes a choloroplast membrane protein CJD1 (Chloroplast J-like Domain 1). Predicted to contain a transit peptide, three transmembrane domains and an N-terminal J-like domain. Influences fatty acid composition of chloroplast lipids.	CJD1	-1.46912773851961	8.4087522438755e-50
AT1G08650	Encodes a phosphoenolpyruvate carboxylase kinase that is expressed at highest levels in leaves. Expression is induced by light. The mRNA is cell-to-cell mobile.	ATPPCK1,PPCK1	-0.412988604596254	1.55985218309709e-05
AT1G08680	A member of ARF GAP domain (AGD), A thaliana has 15 members, grouped into four classes. AGD14 belongs to the class 4, together with AGD15.	AGD14,ZIGA4	-0.266869104832009	0.00027569798559799
AT1G08700	Encodes a protein similar to animal presenilin whose expression is increased in response to potassium (K+) deprivation. Located in intracellular membrane compartments.	PS1	-0.299918788302932	0.000706957511153914
AT1G08750	GPI8/PIG-K homolog involved in stomata development. Loss of function alleles do not transmit through the pollen.	ATGPI8,GPI8	-0.430923667474527	0.0100440717421124
AT1G08770	prenylated RAB acceptor 1.E;(source:Araport11)	PRA1.E	-0.37772893738767	0.000723253471323225
AT1G08830	Encodes a cytosolic copper/zinc superoxide dismutase CSD1 that can detoxify superoxide radicals. Its expression is affected by miR398-directed mRNA cleavage. Regulated by biotic and abiotic stress. Activation of CSD1 in the cytoplasm involves both a CCS-dependent and -independent pathway.	AtSOD1,CSD1,SOD1	-0.411381132036009	5.0367336694149e-06
AT1G08845	Member of the uL18 RNA-binding protein family. uL18 proteins share a short structurally conserved domain that binds the 5S rRNA and allow its incorporation into ribosomes.	HES	-0.577624989810275	0.0265577326626473
AT1G08857	Natural antisense transcript overlaps with AT1G66880;(source:Araport11)	NA	-1.06902612650827	0.0480788041303601
AT1G08960	Encodes a member of the Potassium-dependent sodium-calcium exchanger like-family that localizes to the plasma membrane and nuclear periphery, and has a role in mediating high-af&	ATCAX11,AtCXX5,CAX11,CCX5	-0.686792767059176	1.22115853303295e-09
AT1G09020	Component of the regulatory subunit of SNF1-related protein kinase. As part of the regulatory complex it binds maltose which promotes kinase activity.	ATSNF4,KIN,SNF4	-0.43843495921053	1.26572015476791e-08
AT1G09130	ATP-dependent caseinolytic (Clp) protease/crotonase family protein;(source:Araport11)	NA	-1.54977732542655	1.35886724577863e-95
AT1G09180	A member of ARF-like GTPase family. A thaliana has 21 members, in two subfamilies, ARF and ARF-like (ARL) GTPases.	ATSAR1,ATSARA1A,SARA1A	-2.54481642188121	6.28298175153453e-05
AT1G09190	Tetratricopeptide repeat (TPR)-like superfamily protein;(source:Araport11)	NA	-1.12176190552899	4.24212673678957e-05
AT1G09200	Histone superfamily protein;(source:Araport11)	H3.1	-0.729674299887069	7.25963774228313e-06
AT1G09210	Encodes one of three Arabidopsis calreticulins.Post-transcriptionally regulates together with CRT1 VAMP721/722 levels under ER stress.	AtCRT1b,CRT1b,CRT2	-0.338084439527239	0.000195847177700948
AT1G09220	Pentatricopeptide repeat (PPR) superfamily protein;(source:Araport11)	NA	-1.25831382124885	0.00116949353388154
AT1G09240	Encodes a nicotianamine synthase.	ATNAS3,NAS3	-2.32148880036608	1.89477818236789e-06
AT1G09257	Natural antisense transcript overlaps with AT1G71490;(source:Araport11)	NA	-1.37672820614106	0.00544397528831606
AT1G09300	Encodes a mitochondrial protease ICP55. Alters the stability of proteins by removal of a single amino acid from their sequence.	AtICP55	-0.892350129674731	1.12439582720926e-07
AT1G09310	ABA responsive trichome formation regulator.	NA	-1.12955547176539	3.81668248437144e-24
AT1G09340	Encodes CHLOROPLAST RNA BINDING (CRB), a putative RNA-binding protein. CRB is important for the proper functioning of the chloroplast. Mutations in CRB also affects the circadian system, altering the expression of both oscillator and output genes. The mRNA is cell-to-cell mobile.	CRB,CSP41B,HIP1.3	-4.09246684257678	0
AT1G09350	Predicted to encode a galactinol synthase	AtGolS3,GolS3	-1.19650737341424	0.00239045509236341
AT1G09487	Natural antisense transcript overlaps with AT1G74550;(source:Araport11)	NA	-0.804623875902281	0.0453344291442964
AT1G09490	similar to Eucalyptus gunnii alcohol dehydrogenase of unknown physiological function (GI:1143445), Vigna unguiculata (gi:1854445), NOT a cinnamyl-alcohol dehydrogenase; Location of EST gb:H37170, gb:H77227 and gb:AA605565	NA	-0.786019057296367	1.22624505329093e-07
AT1G09500	similar to Eucalyptus gunnii alcohol dehydrogenase of unknown physiological function (GI:1143445), Vigna unguiculata (gi:1854445), NOT a cinnamyl-alcohol dehydrogenase	NA	-4.29515197382903	1.30714879738161e-19
AT1G09520	hypothetical protein;(source:Araport11)	NA	-0.548158996814736	3.39998007278502e-05
AT1G09560	Encodes a plasodesmata-located protein involved in regulating primary root growth by controlling phloem-mediated allocation of resources between the primary and lateral root meristems. The mRNA is cell-to-cell mobile.	GLP5,PDGLP1	-0.30025132768426	0.0187943417944775
AT1G09660	RNA-binding KH domain-containing protein;(source:Araport11)	NA	-0.577208097014573	5.28009421034436e-08
AT1G09680	Pentatricopeptide repeat (PPR) superfamily protein;(source:Araport11)	NA	-0.715336847677449	0.0327306735856804
AT1G09687	microRNA ath-MIR4228 precursor;(source:Araport11)	ath-MIR4228	-0.563419918840789	0.0216376430237902
AT1G09740	Adenine nucleotide alpha hydrolases-like superfamily protein;(source:Araport11)	NA	-0.426588984522869	4.22138088654554e-05
AT1G09795	ATP phosphoribosyl transferase, catalyses first step of histidine biosynthesis	ATATP-PRT2,ATP-PRT2,HISN1B	-1.15582980979639	3.43296639595501e-32
AT1G09810	evolutionarily conserved C-terminal region 11;(source:Araport11)	ECT11	-0.682212863614779	2.18628997121701e-05
AT1G09815	polymerase delta 4;(source:Araport11)	POLD4	-0.50416520043637	0.00211882399609009
AT1G09820	Pentatricopeptide repeat (PPR-like) superfamily protein;(source:Araport11)	NA	-0.549545709168741	0.0204310265044542
AT1G09830	glycinamide ribonucleotide synthetase (GAR synthetase) that catalyzes the conversion of phosphoribosyl amine to phosphoribosyl glycineamide	PUR2	-1.03167275561906	8.16998929779497e-28
AT1G09850	Arabidopsis thaliana papain-like cysteine peptidase	XBCP3	-1.23303042910532	2.88265014393212e-32
AT1G09900	Pentatricopeptide repeat (PPR-like) superfamily protein;(source:Araport11)	NA	-0.40456237541794	0.0218831934899241
AT1G10000	Ribonuclease H-like superfamily protein;(source:Araport11)	NA	-1.71278825550722	0.0346439753977121
AT1G10020	formin-like protein (DUF1005);(source:Araport11)	NA	-0.36760755753037	0.000267393259733285
AT1G10270	glutamine-rich protein 23;(source:Araport11)	GRP23	-1.47744010191237	6.49214621059277e-54
AT1G10280	Core-2/I-branching beta-1,6-N-acetylglucosaminyltransferase family protein;(source:Araport11)	NA	-0.833447580219942	1.07843096694084e-08
AT1G10310	encodes a NADPH-dependent pterin aldehyde reductase that accepts pterin aldehyde as well as dihydropterin aldehyde as substrates involved in metabolism and salvage of folate and its derivatives.	NA	-0.89728477289787	0.000824066049538335
AT1G10360	Encodes glutathione transferase belonging to the tau class of GSTs. Naming convention according to Wagner et al. (2002).	ATGSTU18,GST29,GSTU18	-1.65089519121136	2.51046245577762e-42
[truncated: 6,194 more rows]
