# Supplementary material
Source: HighWire-hosted journal article supplement (doi:10.1101/rna.080738.125)
Supplement: Supplemental_Data_Legends.docx [file Supplemental_Data_Legends.docx]

## **Supplementary Data**

**S1 Data.** Excel spreadsheet containing a list of differentially spliced genes (DSGs) in the wild type during de-etiolation, including annotations, alternative splicing mechanisms, the corresponding transcript isoforms involved, and the respective timepoints for comparison where changes were observed.

**S2 Data.** Excel spreadsheet containing a comprehensive list of DSGs changing between wild type and gun1 during de-etiolation, including annotations, alternative splicing mechanisms, the corresponding transcript isoforms involved, and the respective timepoints for comparison where changes were observed.

**S3 Data.** Excel spreadsheet containing 40 genes that were identified. All these genes are genes related to chloroplast or photosynthesis that exhibit transcript changes in wild-type plants during de-etiolation, and exhibit transcript alterations in gun1-102 plants compared to the wild-type.

**S4 Data.** Excel spreadsheet containing 40 identified genes and their associated transcripts that undergo isoform switch during de-etiolation. Transcripts with predicted premature termination codons (PTCs) are indicated.

**S5 Data.** Excel spreadsheet containing primer sequences used for validation of RNA-Seq profiles by qPCR.

**S6 Data.** Excel spreadsheet containing differentially expressed genes in wild-type plants upon light exposure obtained by comparing 0h versus 3h. DEGs annotations, Log2FC and Adjusted P values are available.

**S7 Data.** Excel spreadsheet containing differentially expressed genes in wild-type plants upon light exposure obtained by comparing 0h versus 24h. DEGs annotations, Log2FC and Adjusted P values are available.
